# Supplementary material
Source: MDPI journal article supplement (https://www.mdpi.com/1996-1073/10/11/1899)

# Central Africa

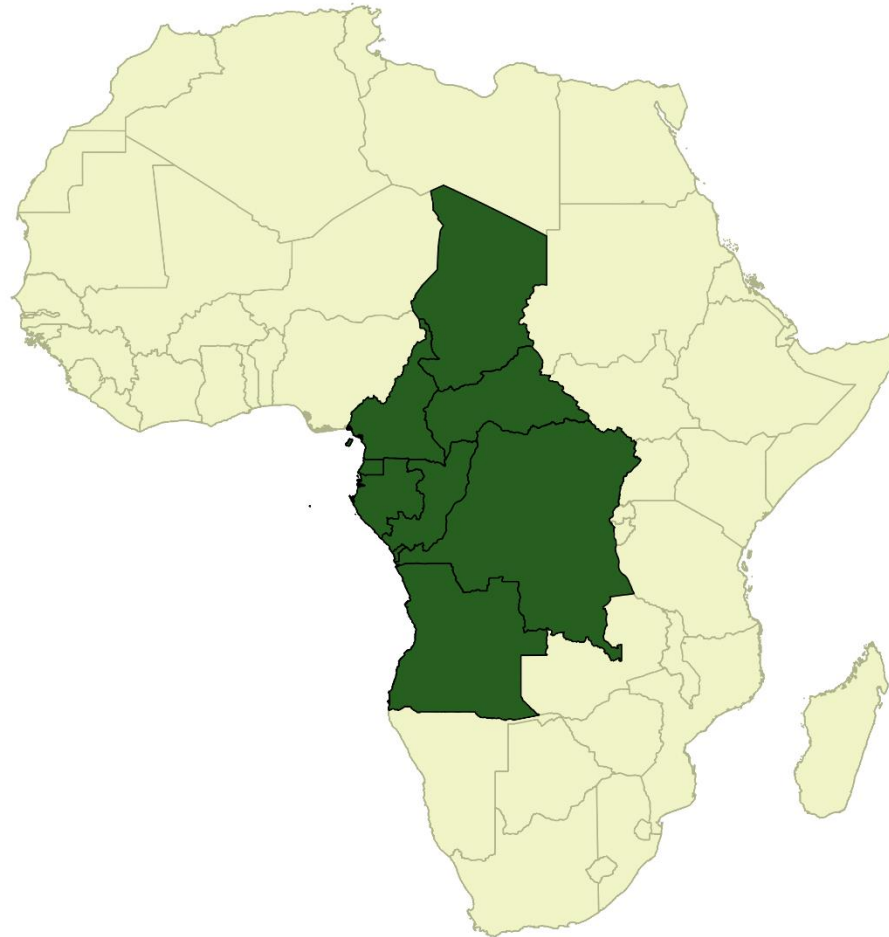

# Angola

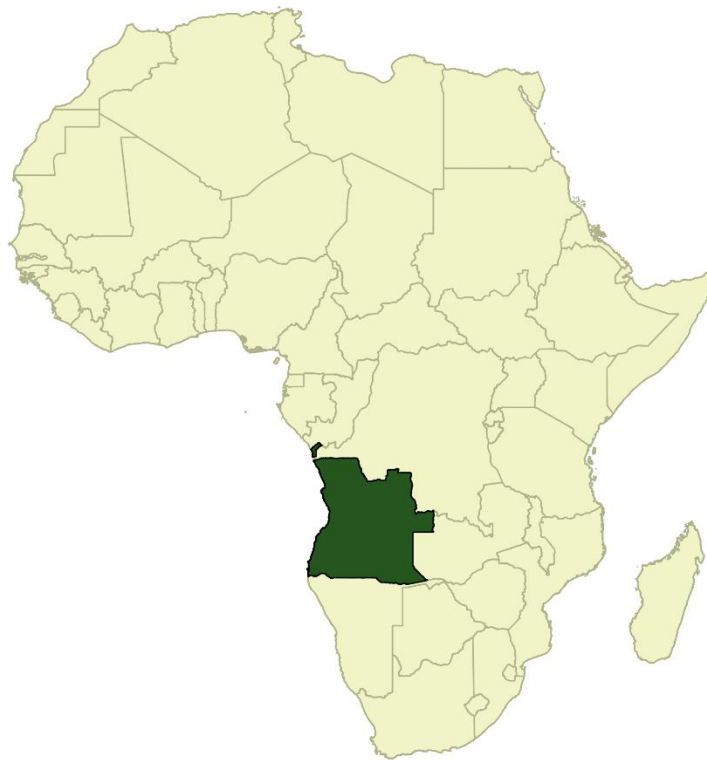

# Night light emission and Population of Angolan regions

**Night light emission in Angola**

Detected night lights

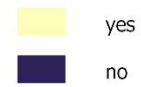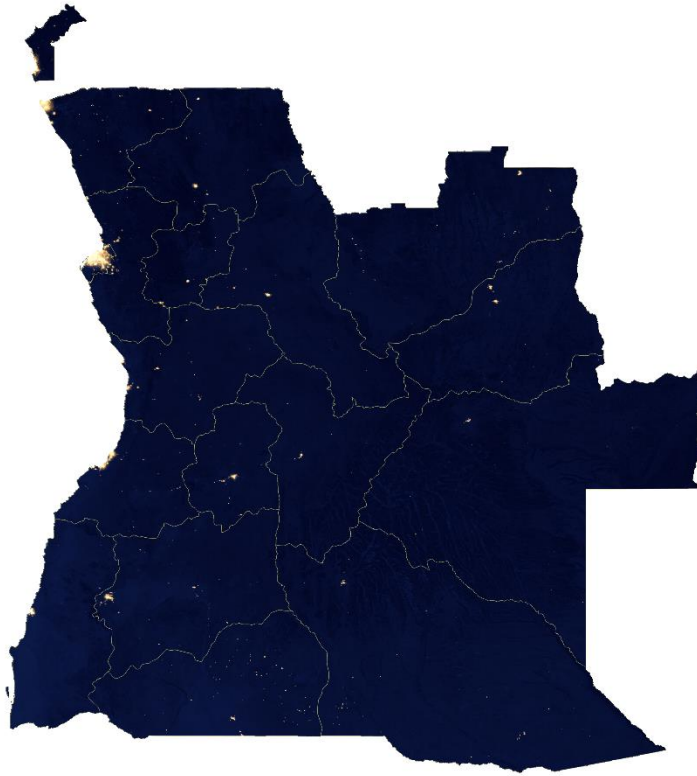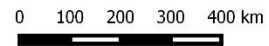

**Population structure of Angola**

Population density (people/750x750m<sup>2</sup>)

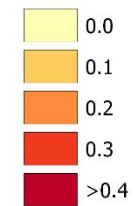

River and Lake (blue line)

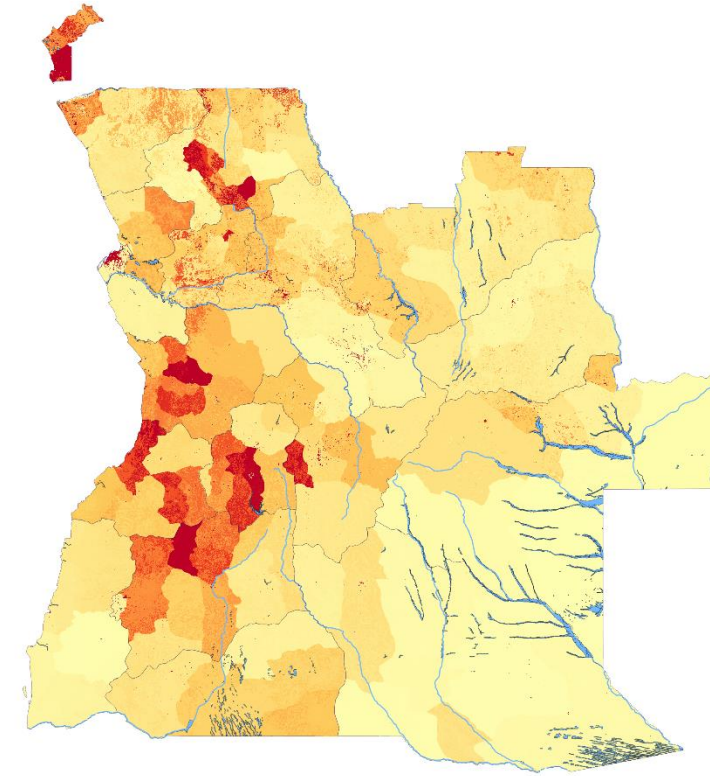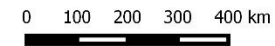

# Electrification option in all Angolan regions: GridBuilt-GridDom

## Electrification options of Angolan regions

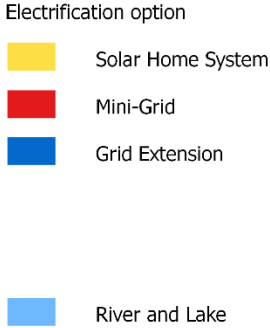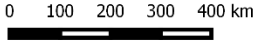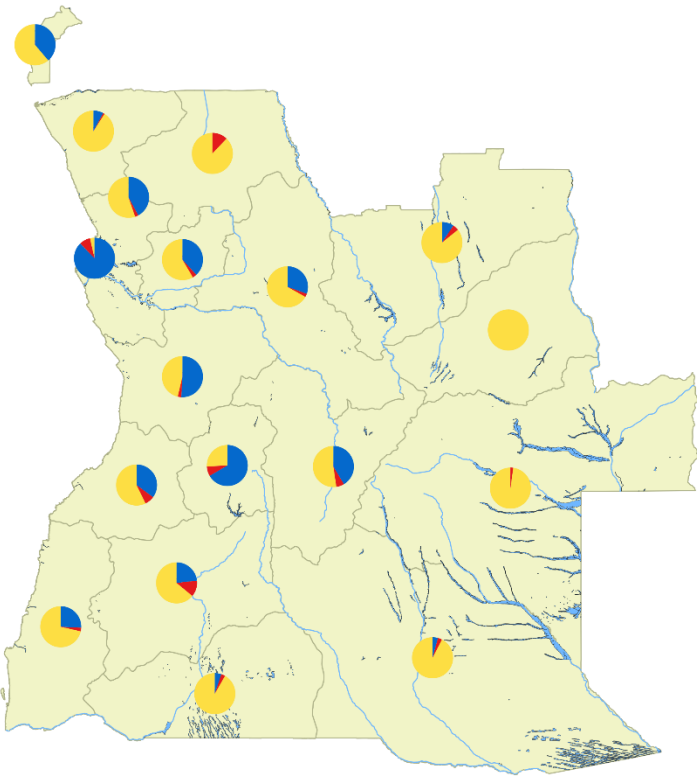

## Electrification options of Angolan regions

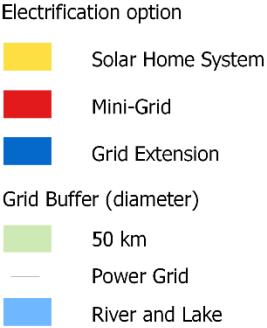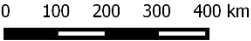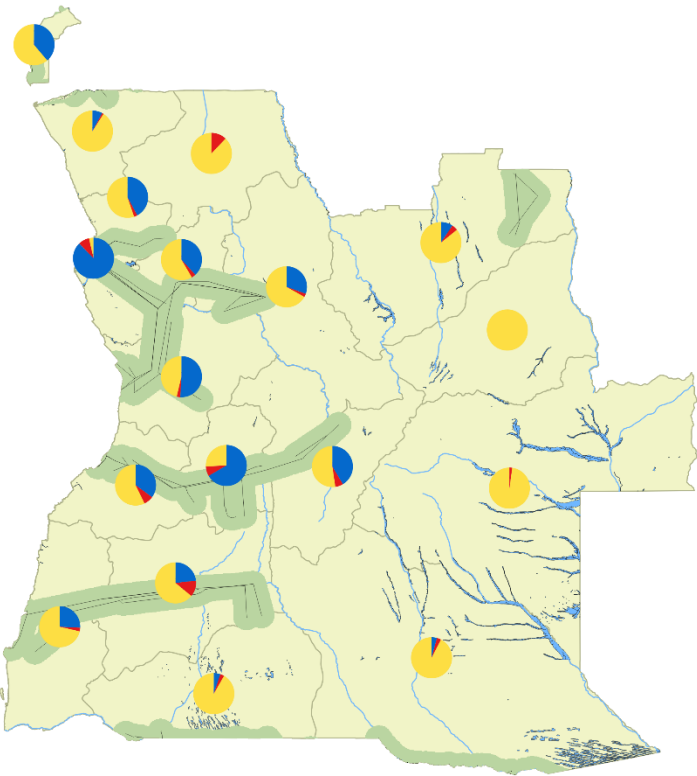

# Electrification option in all Angolan regions: GridBuilt-SHSDom

## Electrification options of Angolan regions

Electrification option

- Solar Home System
- Mini-Grid
- Grid Extension

River and Lake

0 100 200 300 400 km

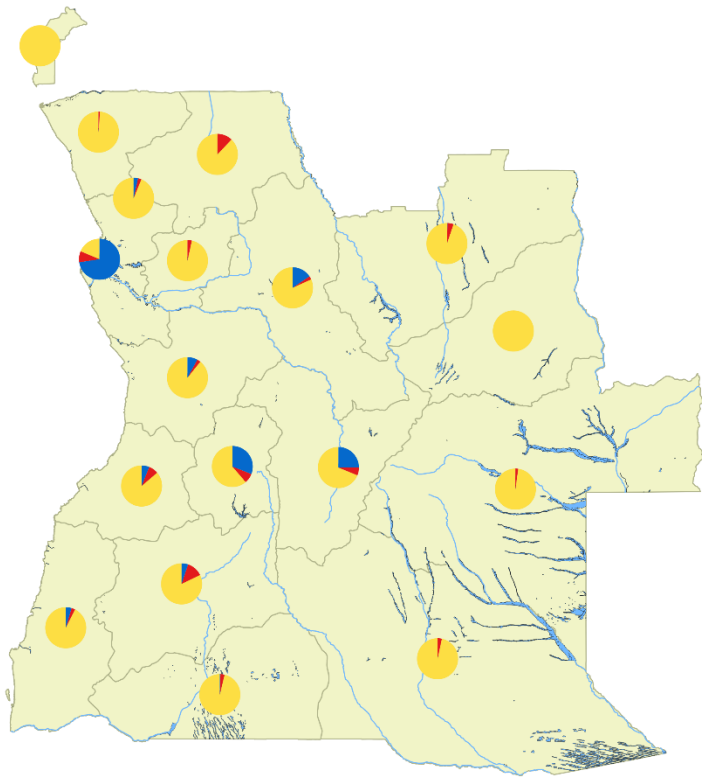

## Electrification options of Angolan regions

Electrification option

- Solar Home System
- Mini-Grid
- Grid Extension

Grid Buffer (diameter)

- 50 km
- Power Grid
- River and Lake

0 100 200 300 400 km

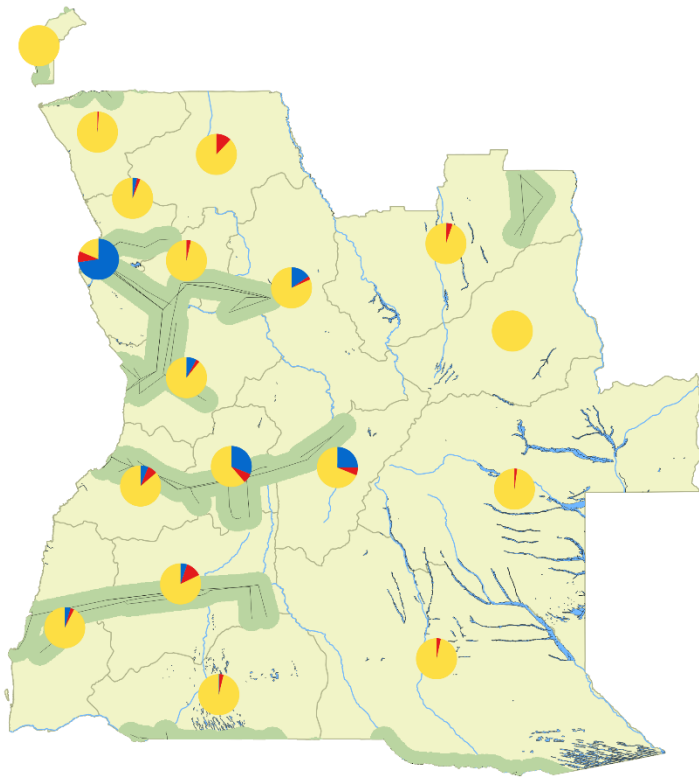

# Electrification option: GridBuilt-SHSDom

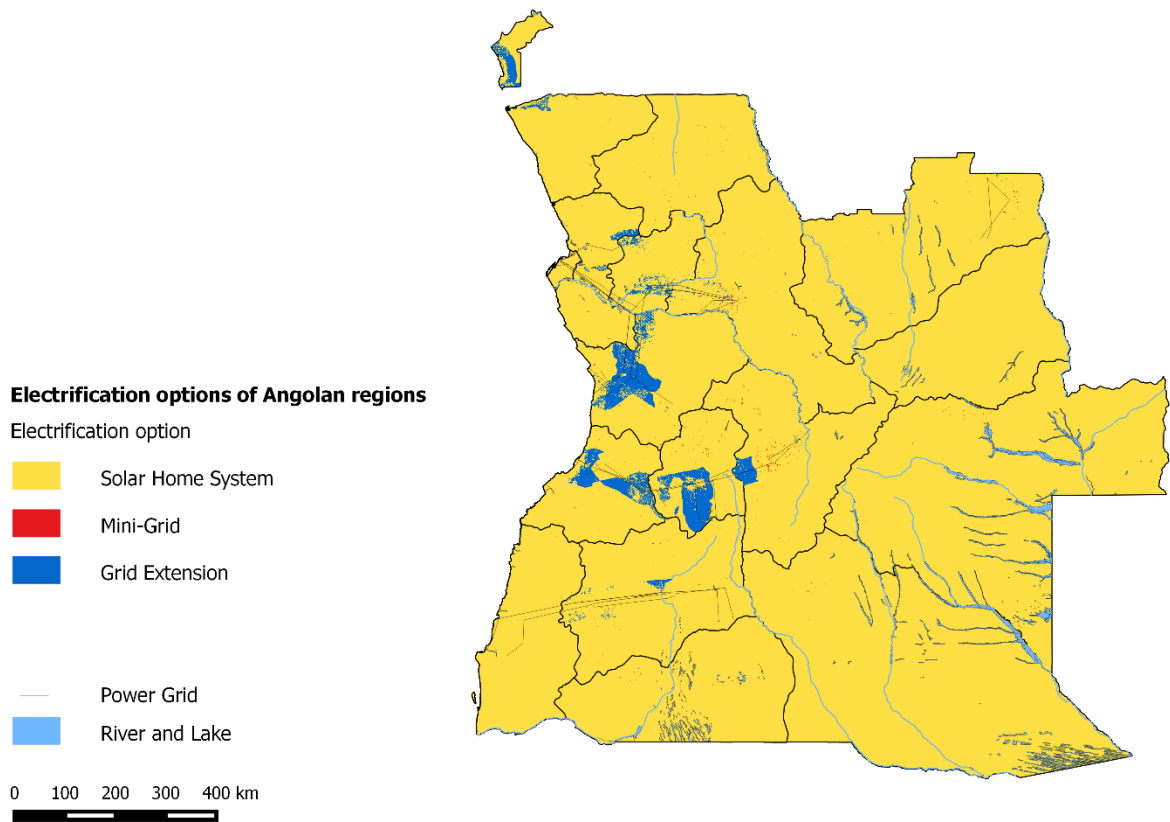

# Electrification option: GridBuilt-GridDom

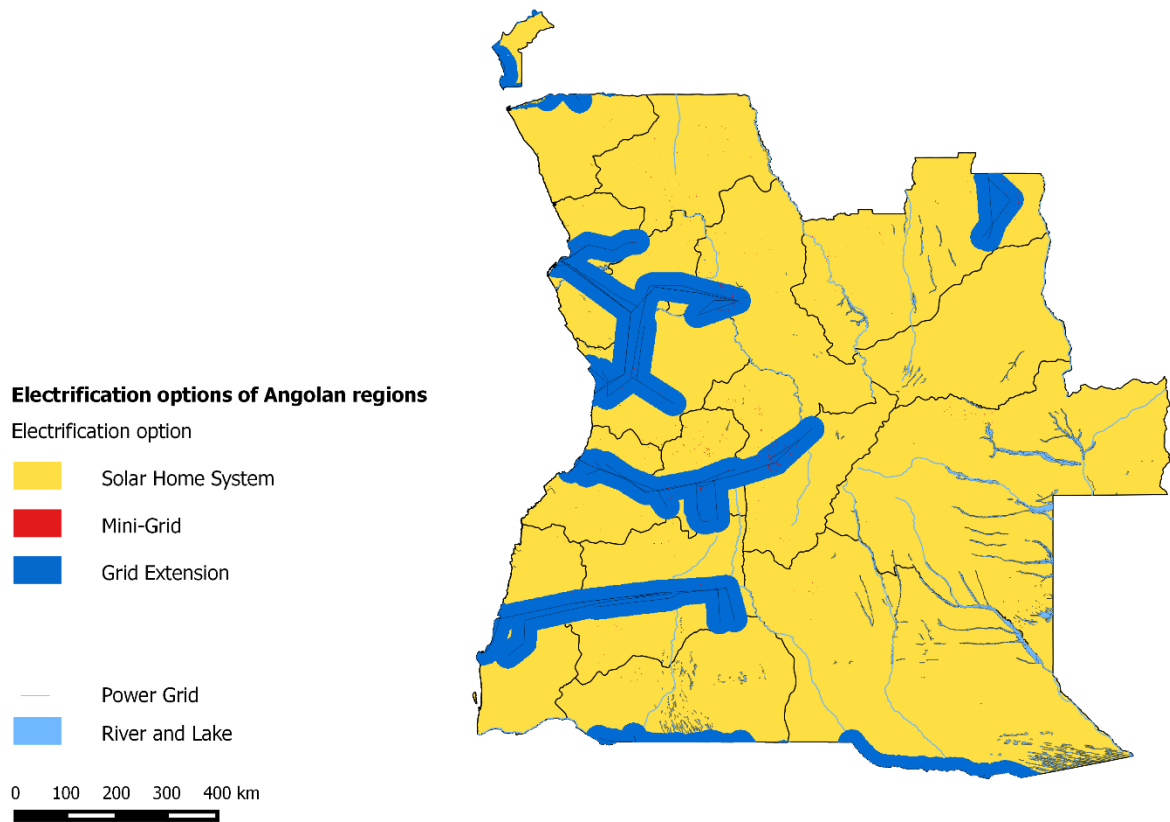

Share of electrification options in all Angolan regions

SHS (%) Mini-Grid (%) Grid (%)

GridBuilt-GridDom

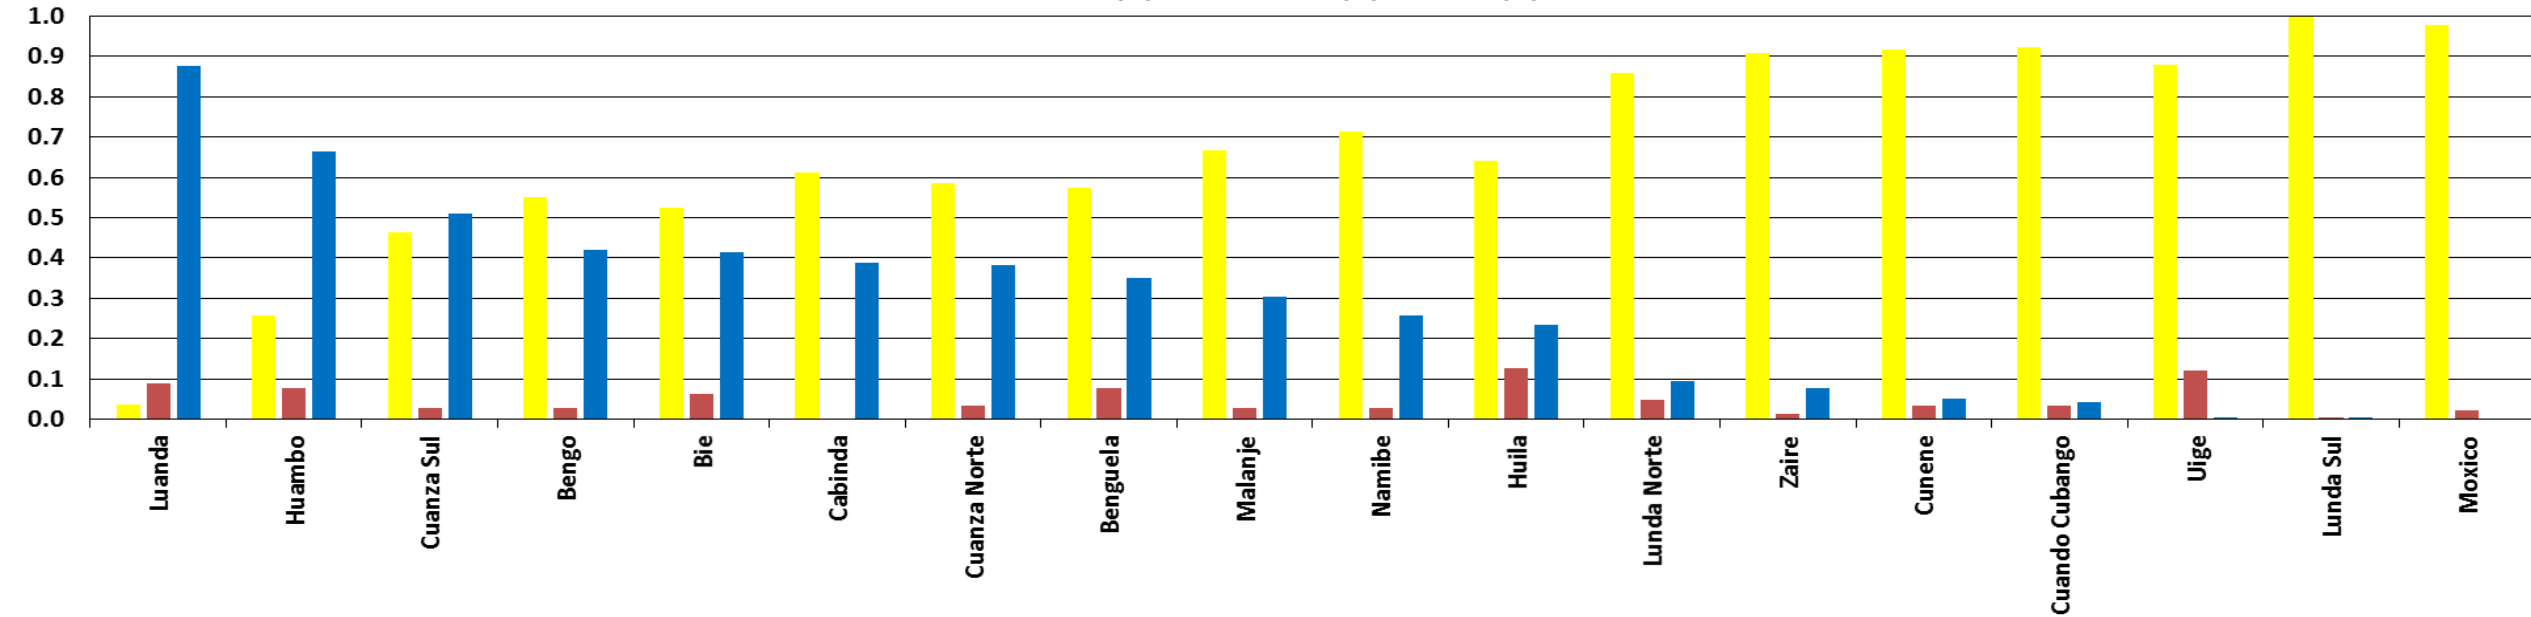

Share of electrification options in all Angolan regions

SHS (%) Mini-Grid (%) Grid (%)

GridBuilt-SHSDom

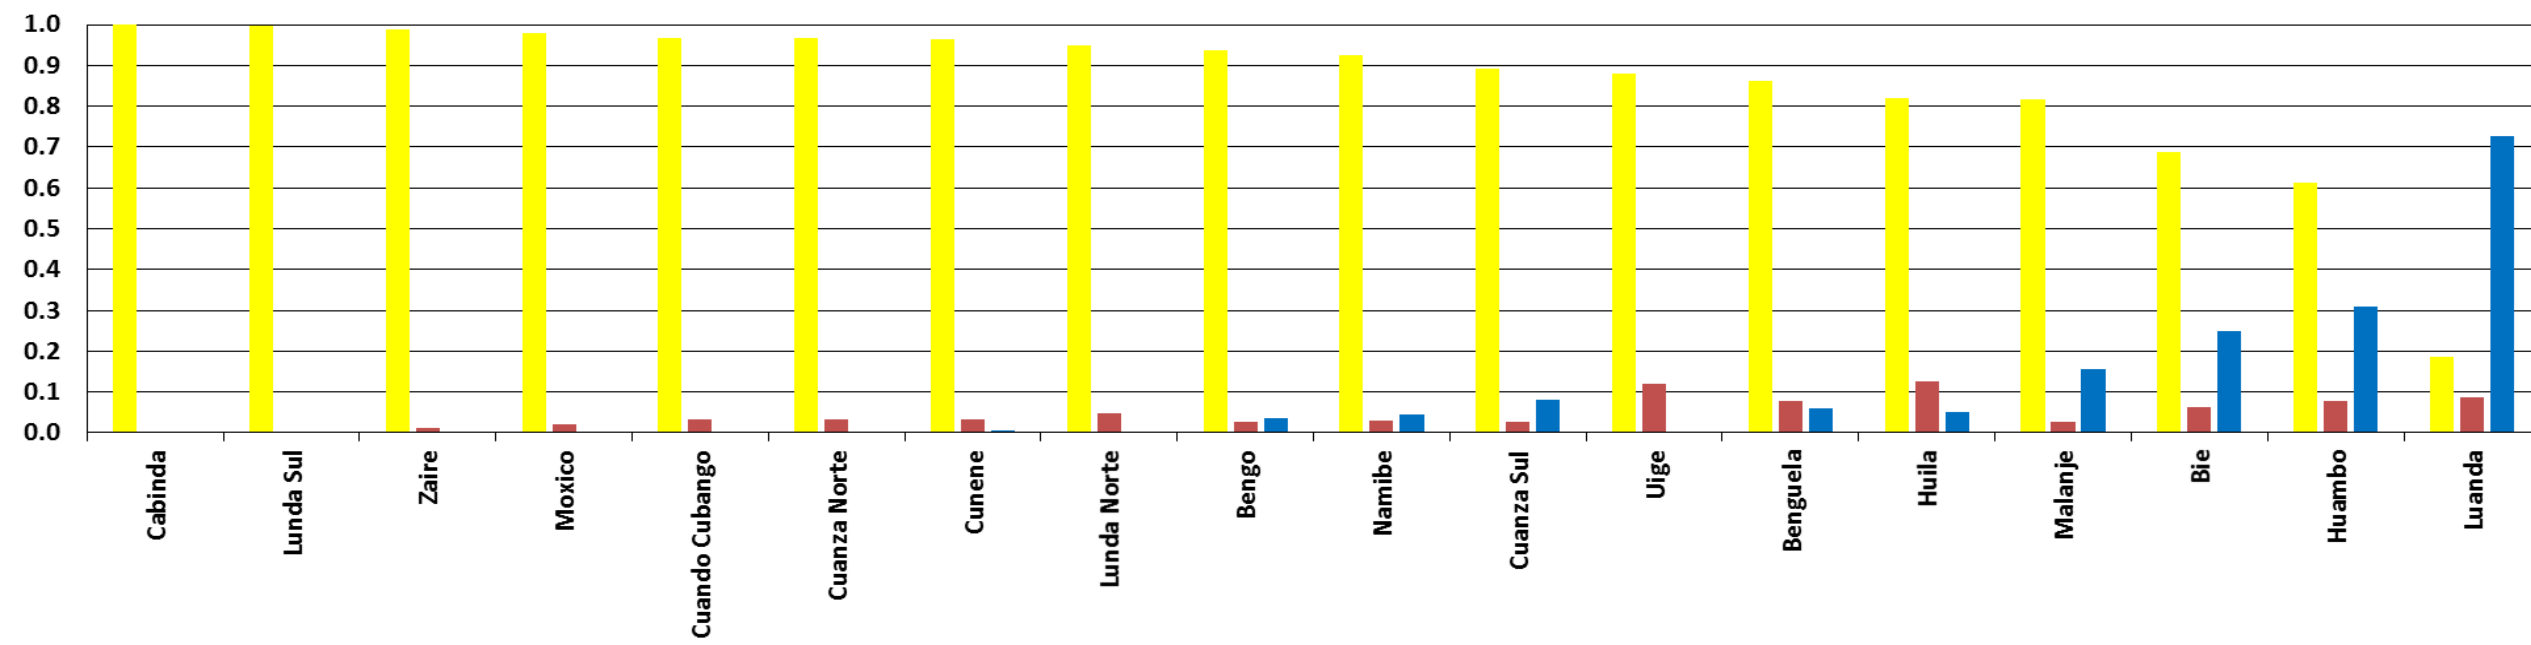

# Electrification option in all Angolan regions: GridPlanned-GridDom

## Electrification options of Angolan regions

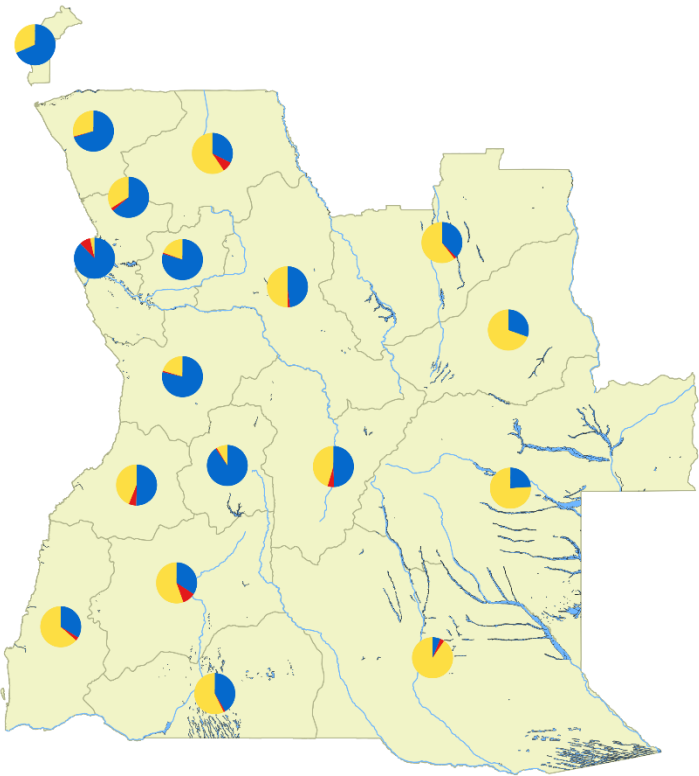

## Electrification options of Angolan regions

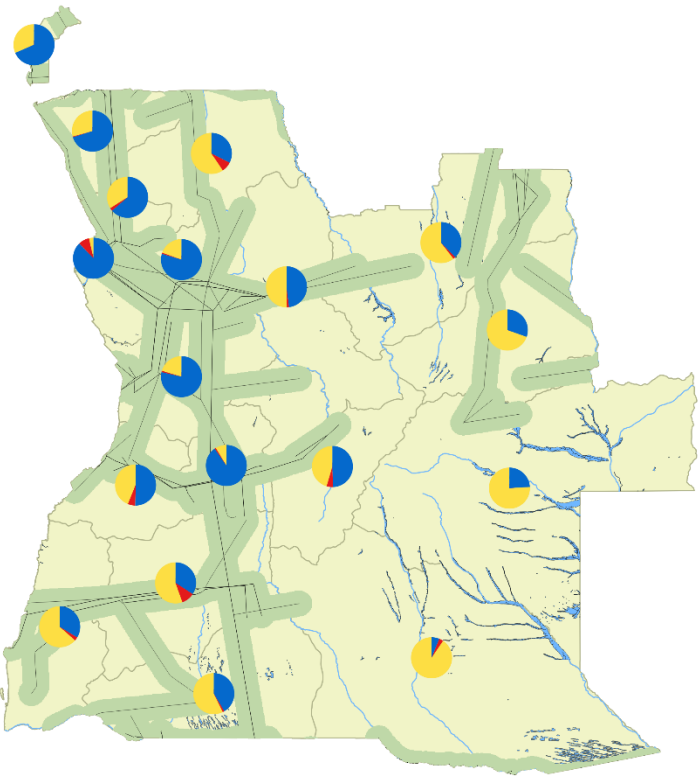

# Electrification option in all Angolan regions: GridPlanned-SHSDom

## Electrification options of Angolan regions

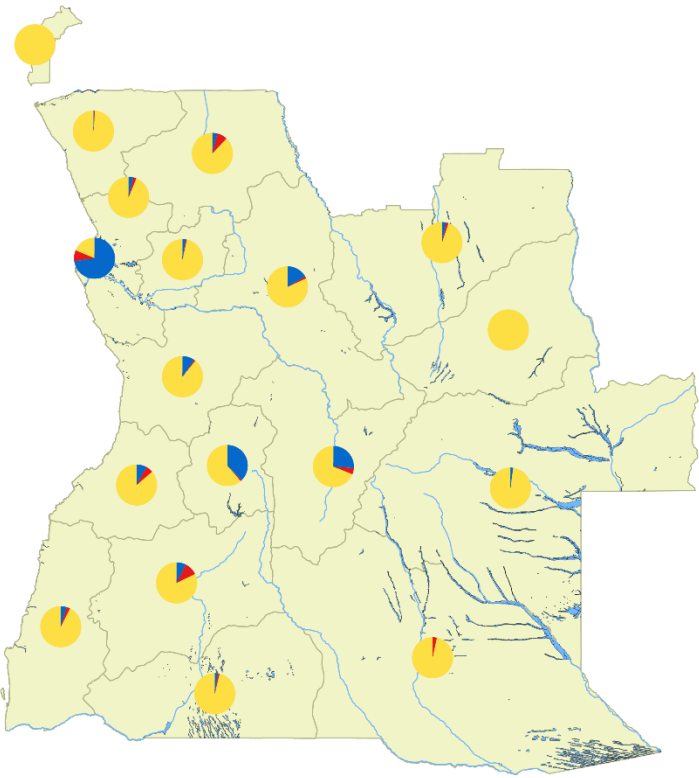

## Electrification options of Angolan regions

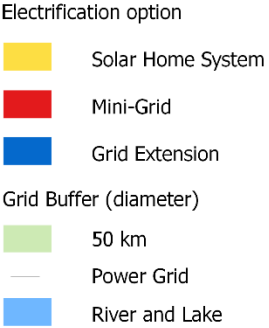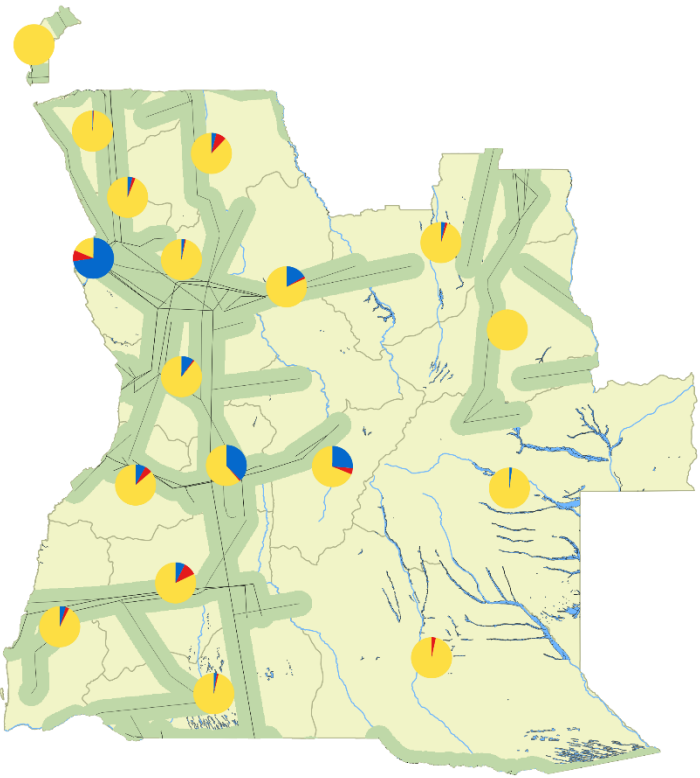

# Electrification option: GridPlanned-SHSDom

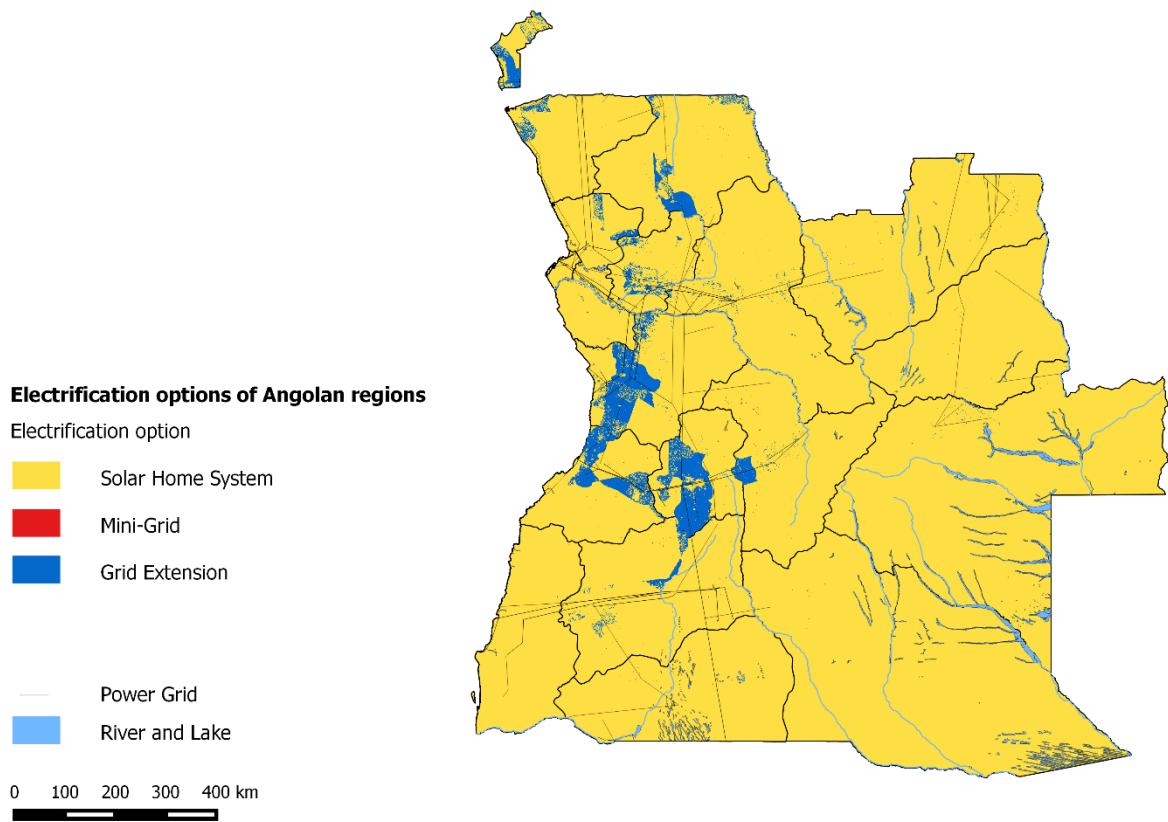

# Electrification option: GridPlanned-GridDom

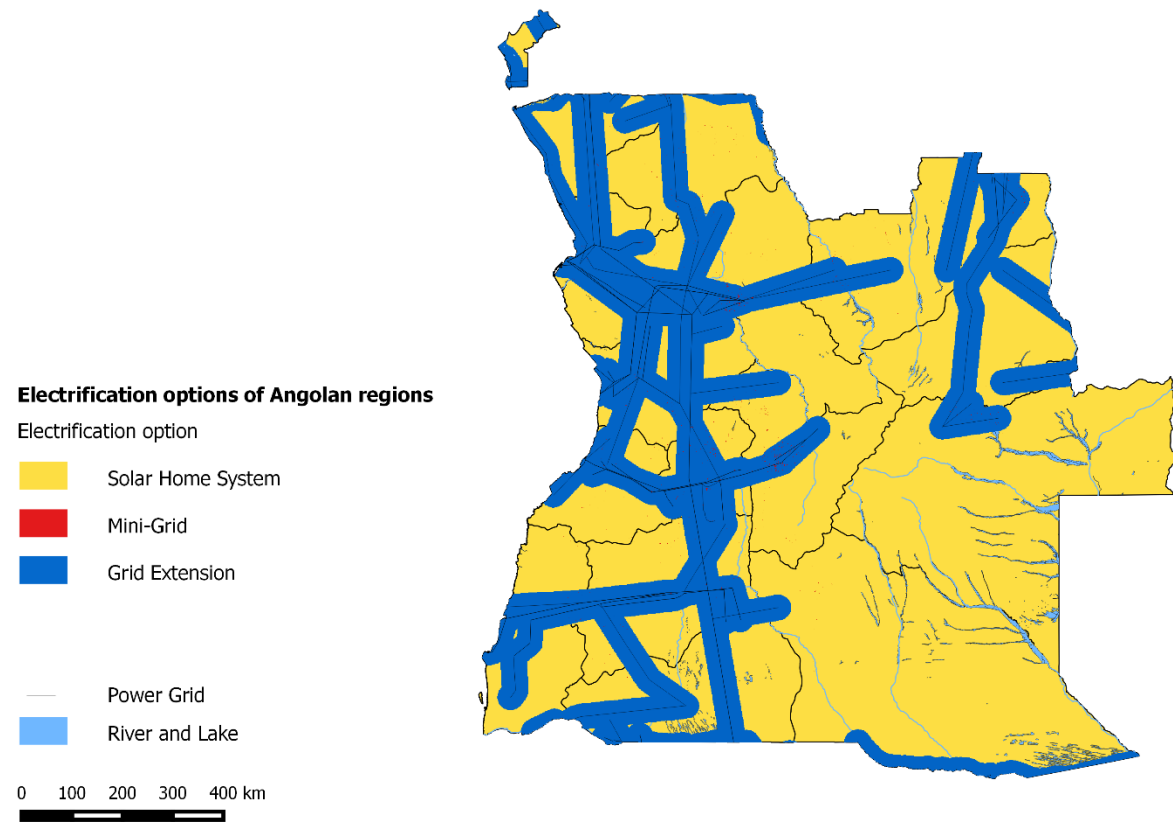

Share of electrification options in all Angolan regions

GridPlanned-GridDom

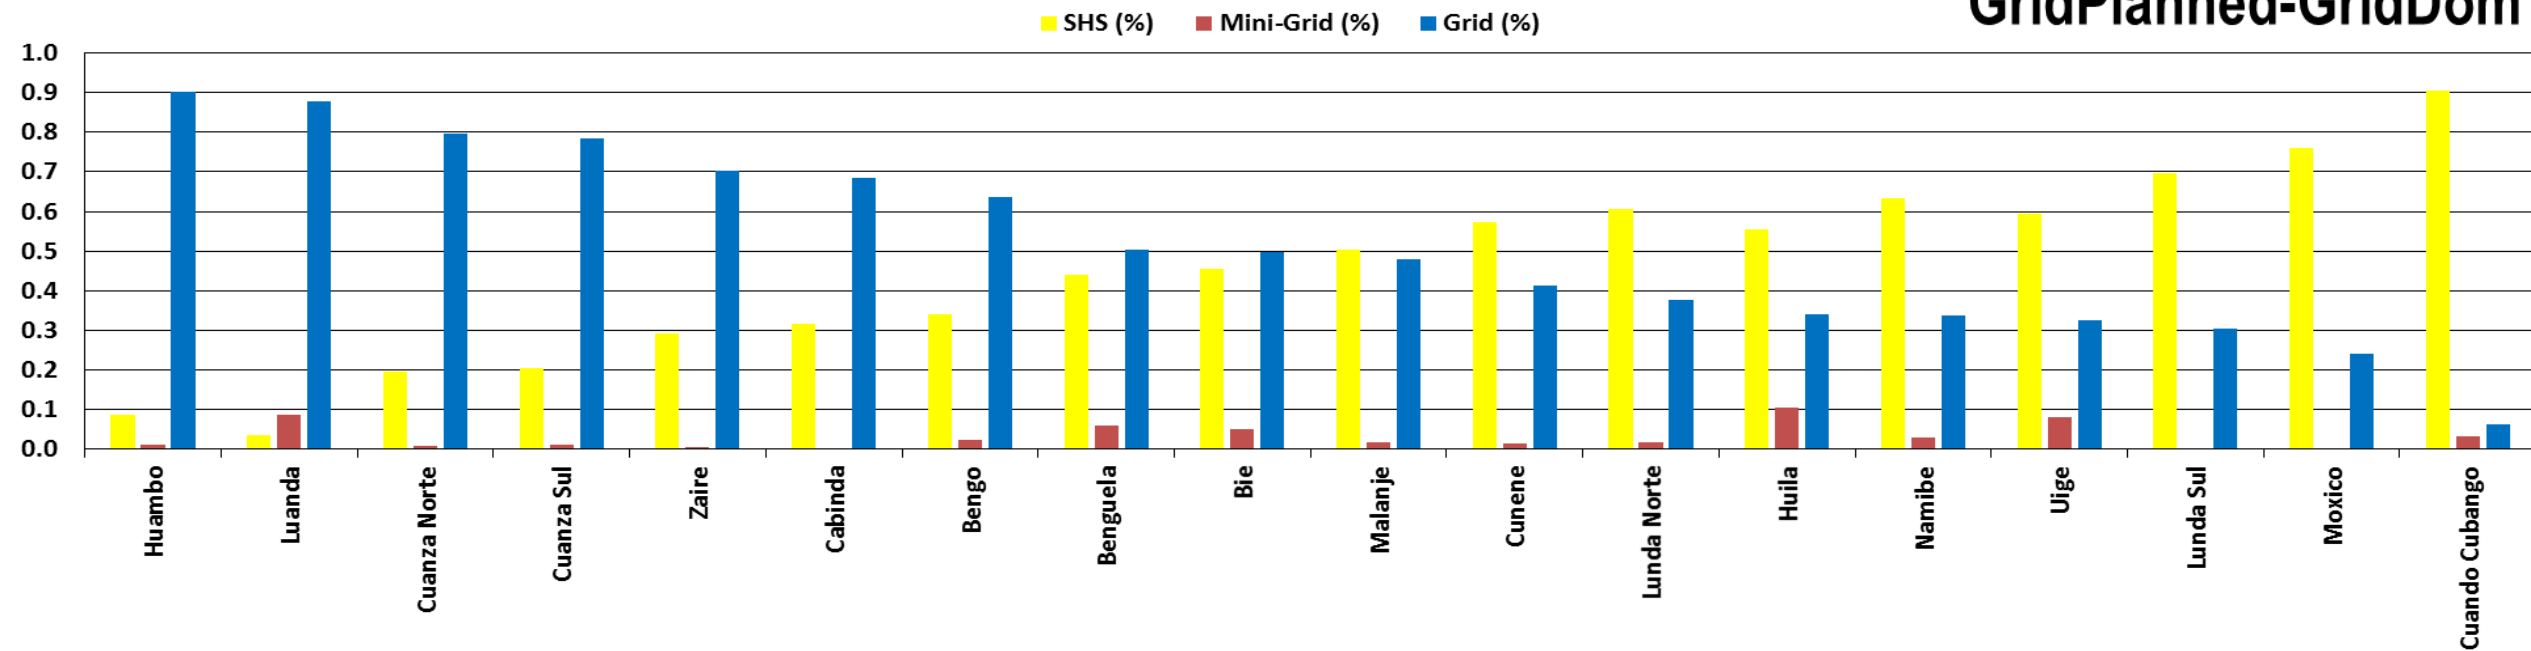

Share of electrification options in all Angolan regions

GridPlanned-SHSDom

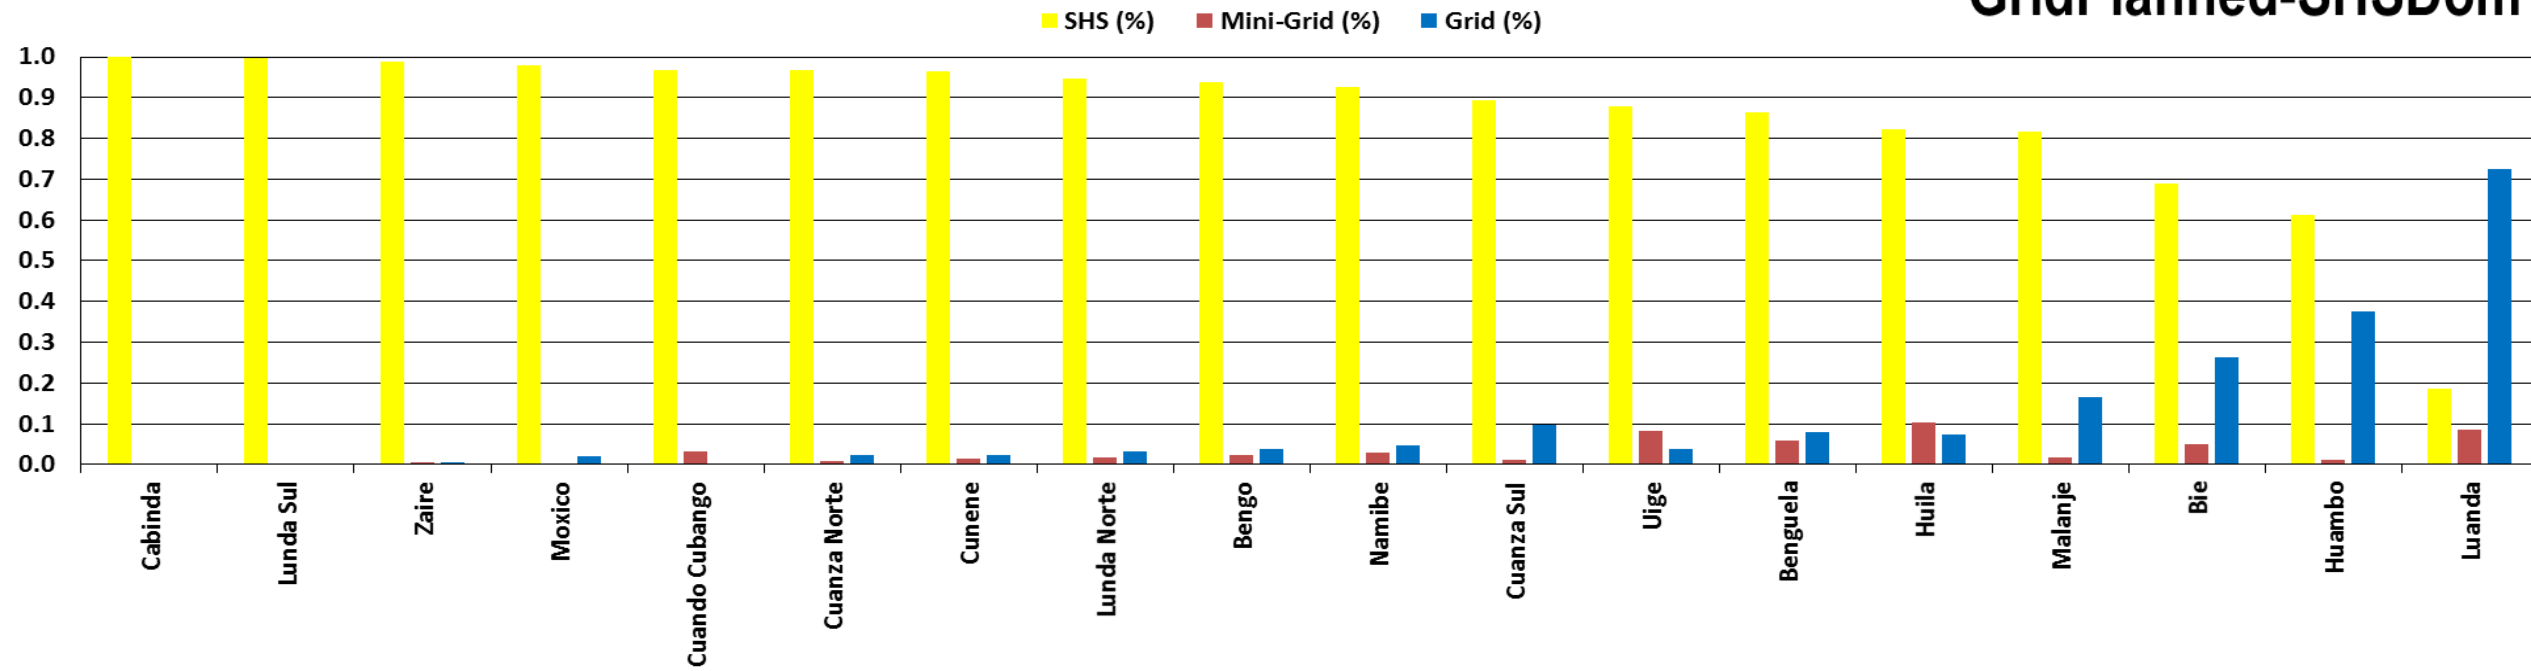

# Cameroon

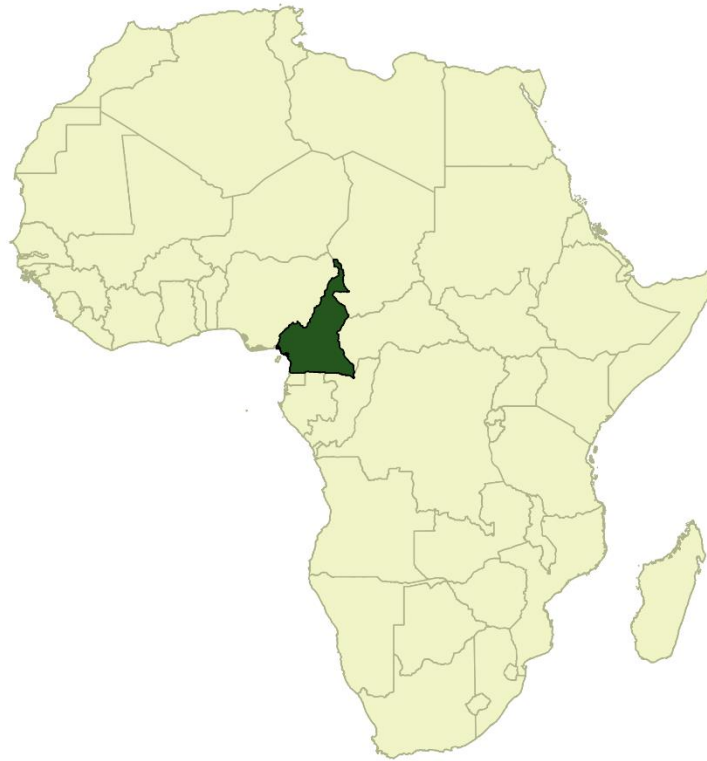

# Night light emission and Population of Cameroonian regions

## Night light emission in Cameroon

Detected night lights

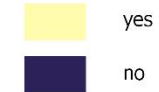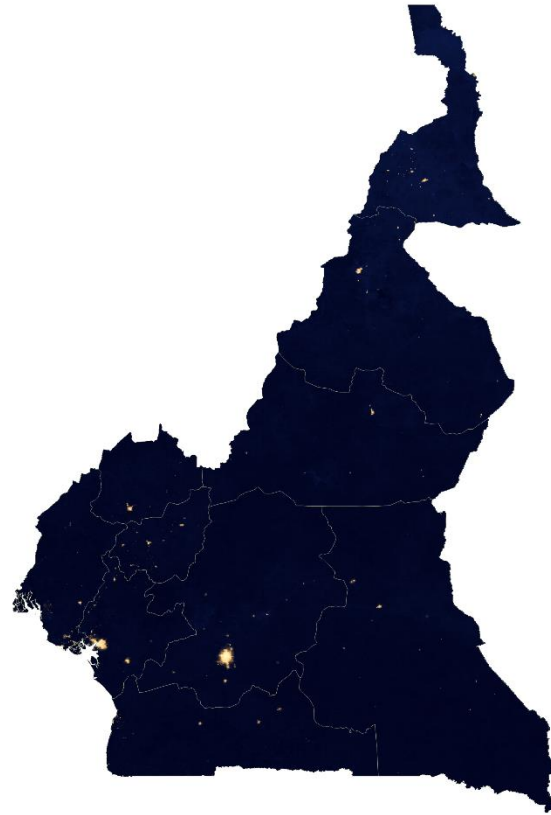

## Population structure of Cameroon

Population density (people/750x750m<sup>2</sup>)

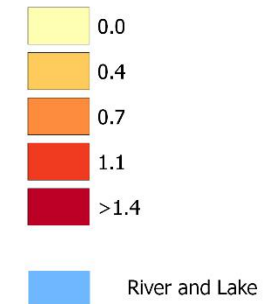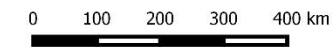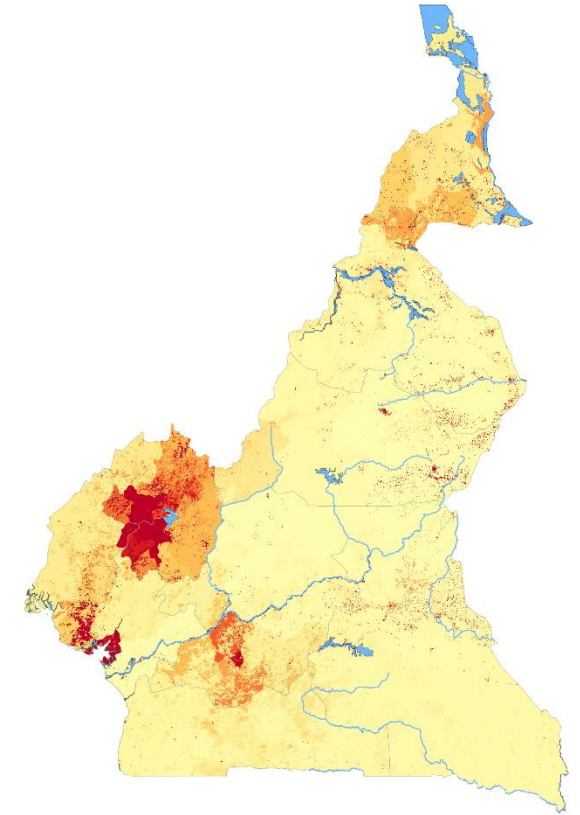

# Electrification option in all Cameroonian regions: GridBuilt-GridDom

## Electrification options of Cameroonian regions

Electrification option

-  Solar Home System
-  Mini-Grid
-  Grid Extension

 River and Lake

0 100 200 300 400 km

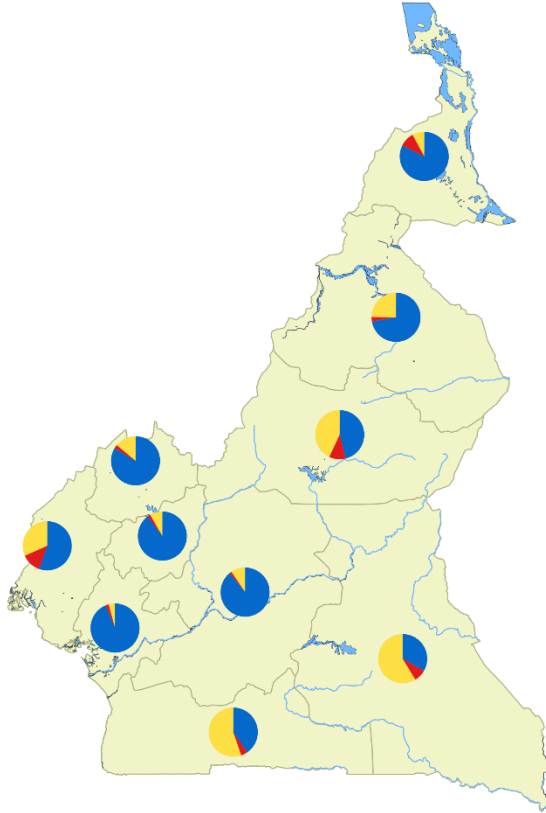

## Electrification options of Cameroonian regions

Electrification option

-  Solar Home System
-  Mini-Grid
-  Grid Extension

Grid Buffer (diameter)

-  50 km
-  Power Grid
-  River and Lake

0 100 200 300 400 km

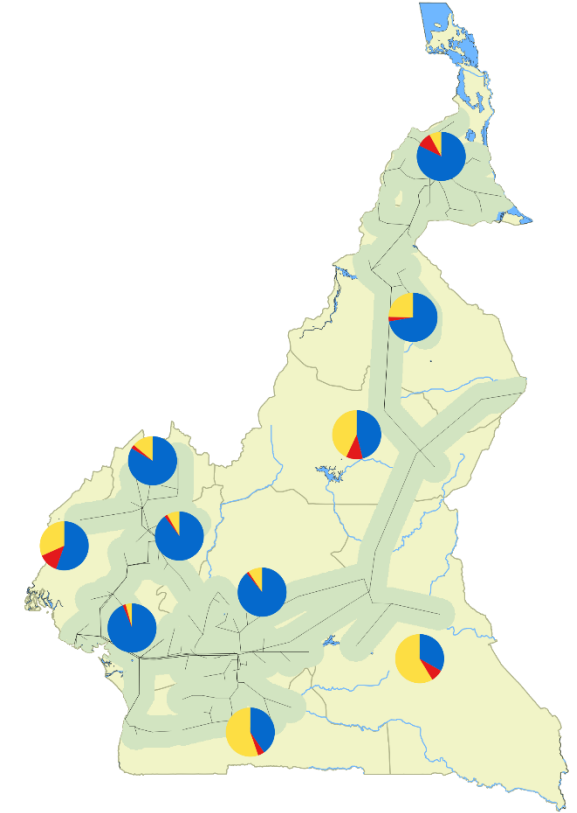

# Electrification option in all Cameroonian regions: GridBuilt-SHSDom

## Electrification options of Cameroonian regions

Electrification option

-  Solar Home System
-  Mini-Grid
-  Grid Extension

 River and Lake

0 100 200 300 400 km

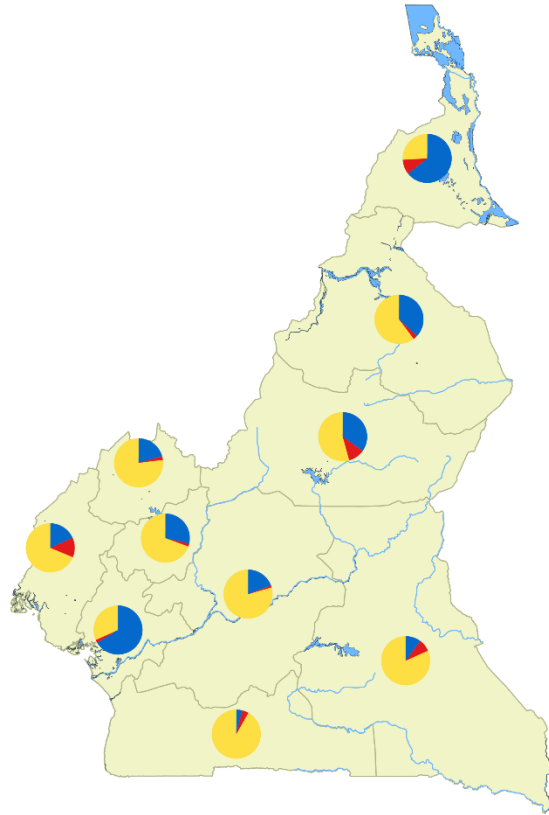

## Electrification options of Cameroonian regions

Electrification option

-  Solar Home System
-  Mini-Grid
-  Grid Extension

Grid Buffer (diameter)

-  50 km
-  Power Grid
-  River and Lake

0 100 200 300 400 km

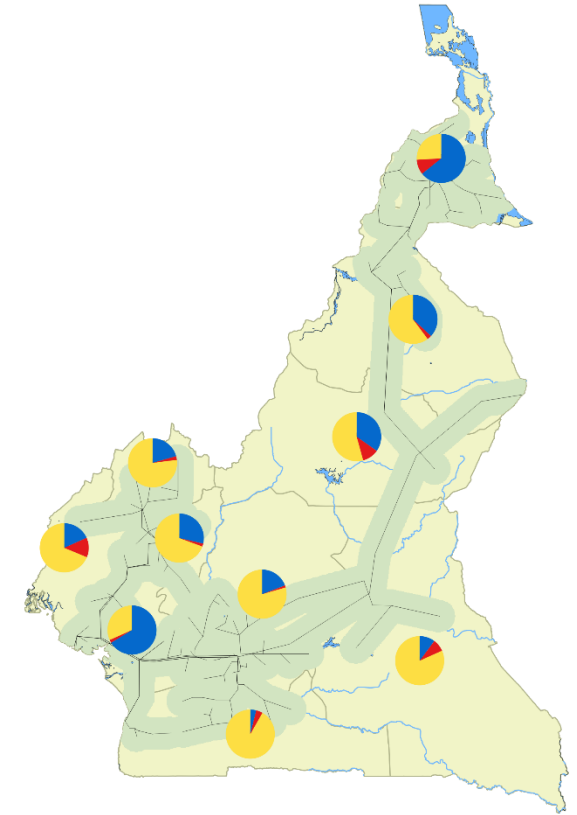

# Electrification option: GridBuilt-SHSDom

## Electrification options of Cameroonian regions

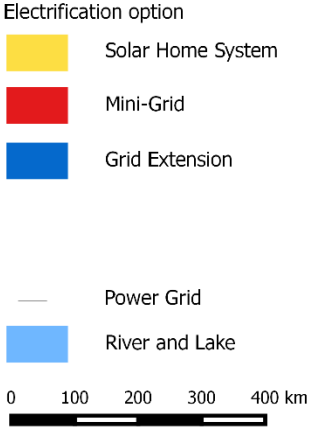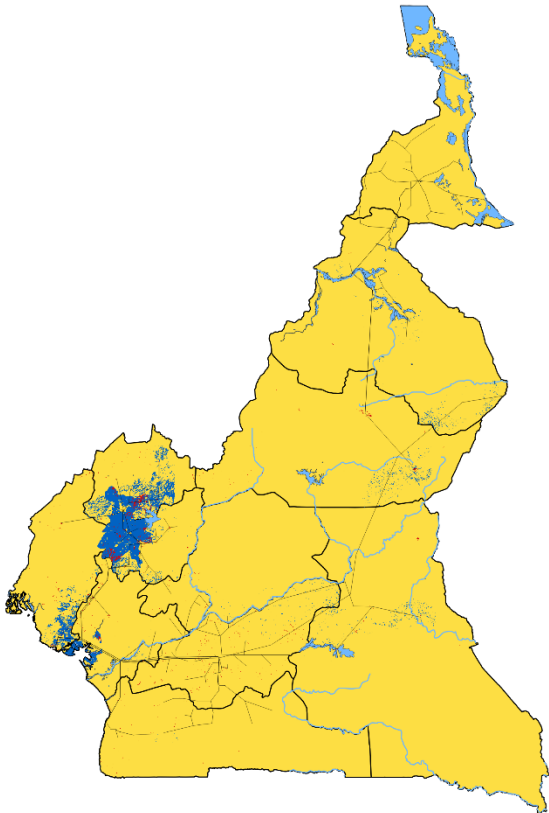

# Electrification option: GridBuilt-GridDom

## Electrification options of Cameroonian regions

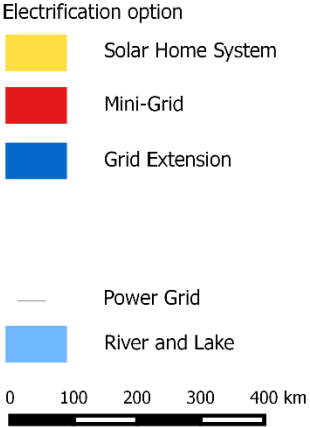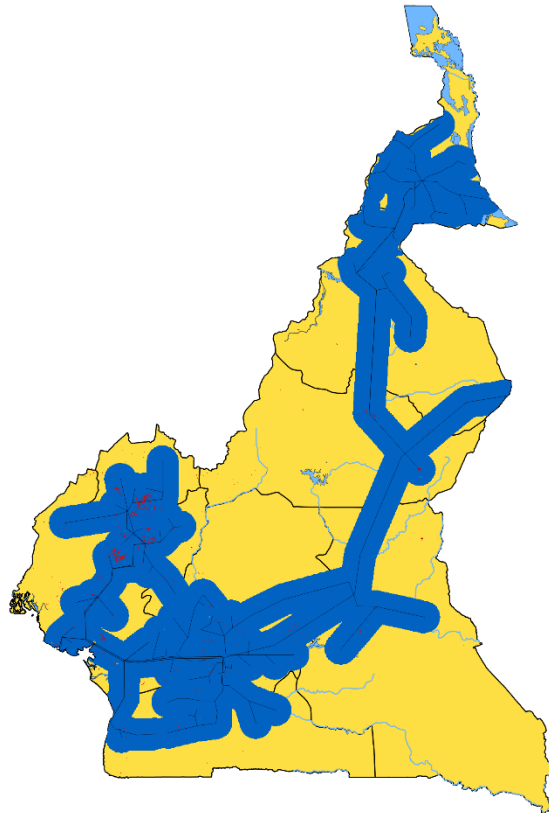

Share of electrification options in all Cameroonian regions

GridBuilt-GridDom

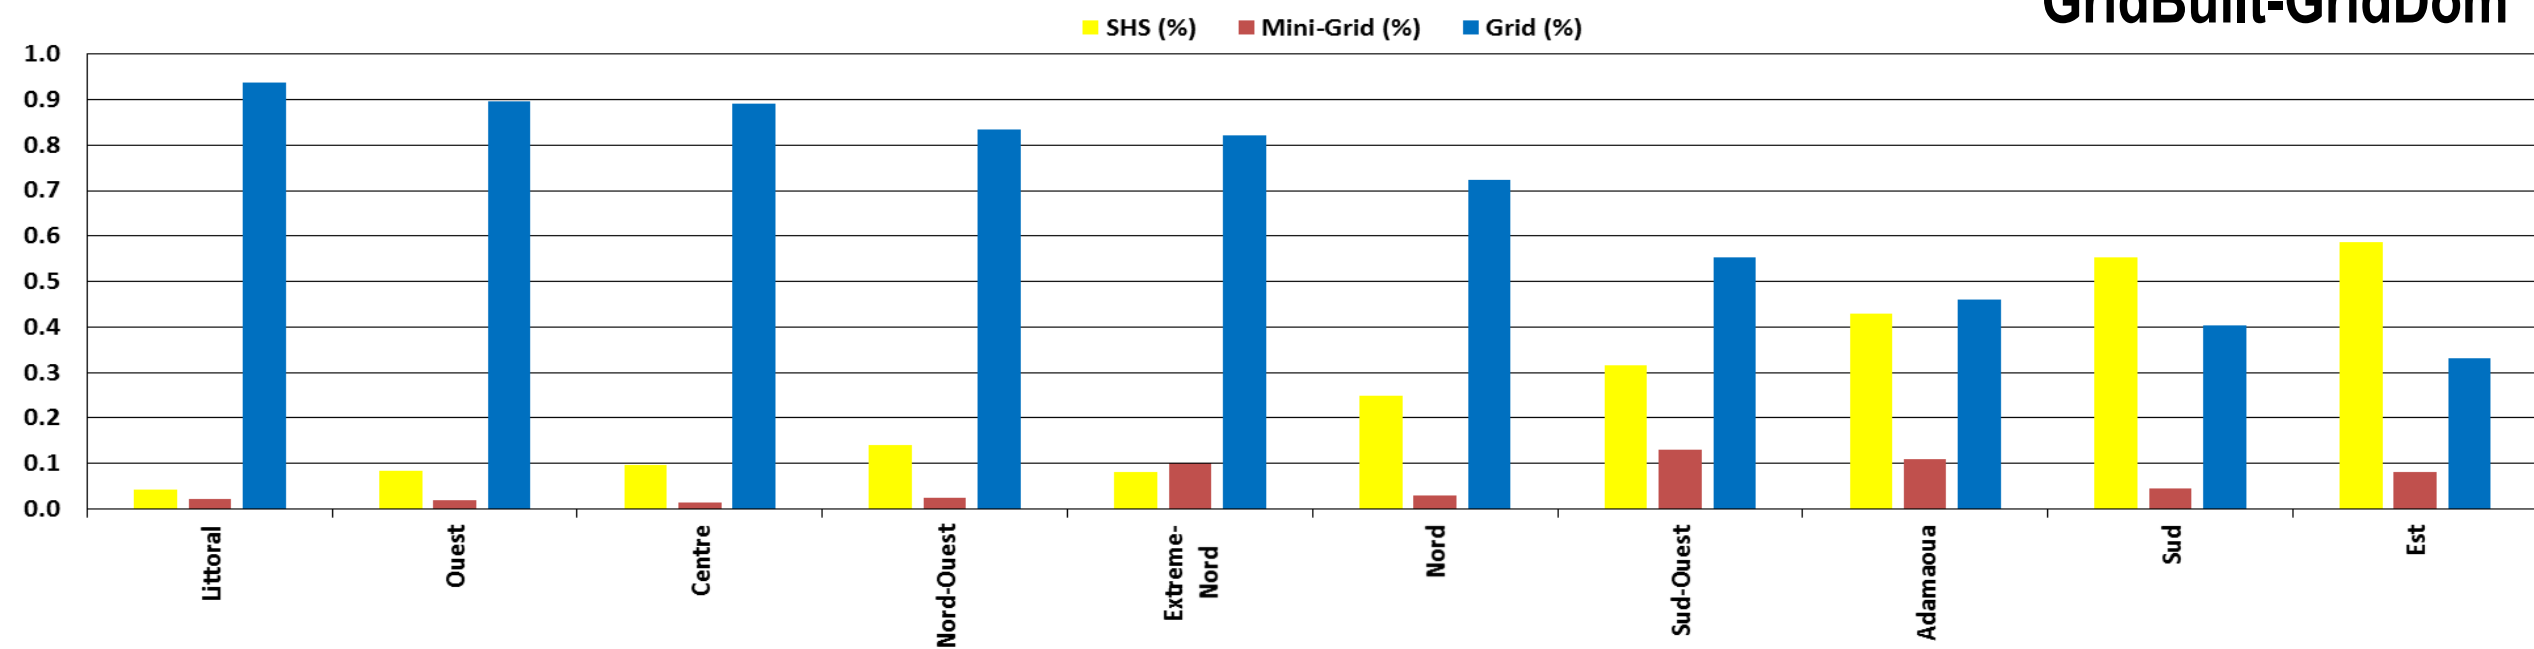

Share of electrification options in all Cameroonian regions

GridBuilt-SHSDom

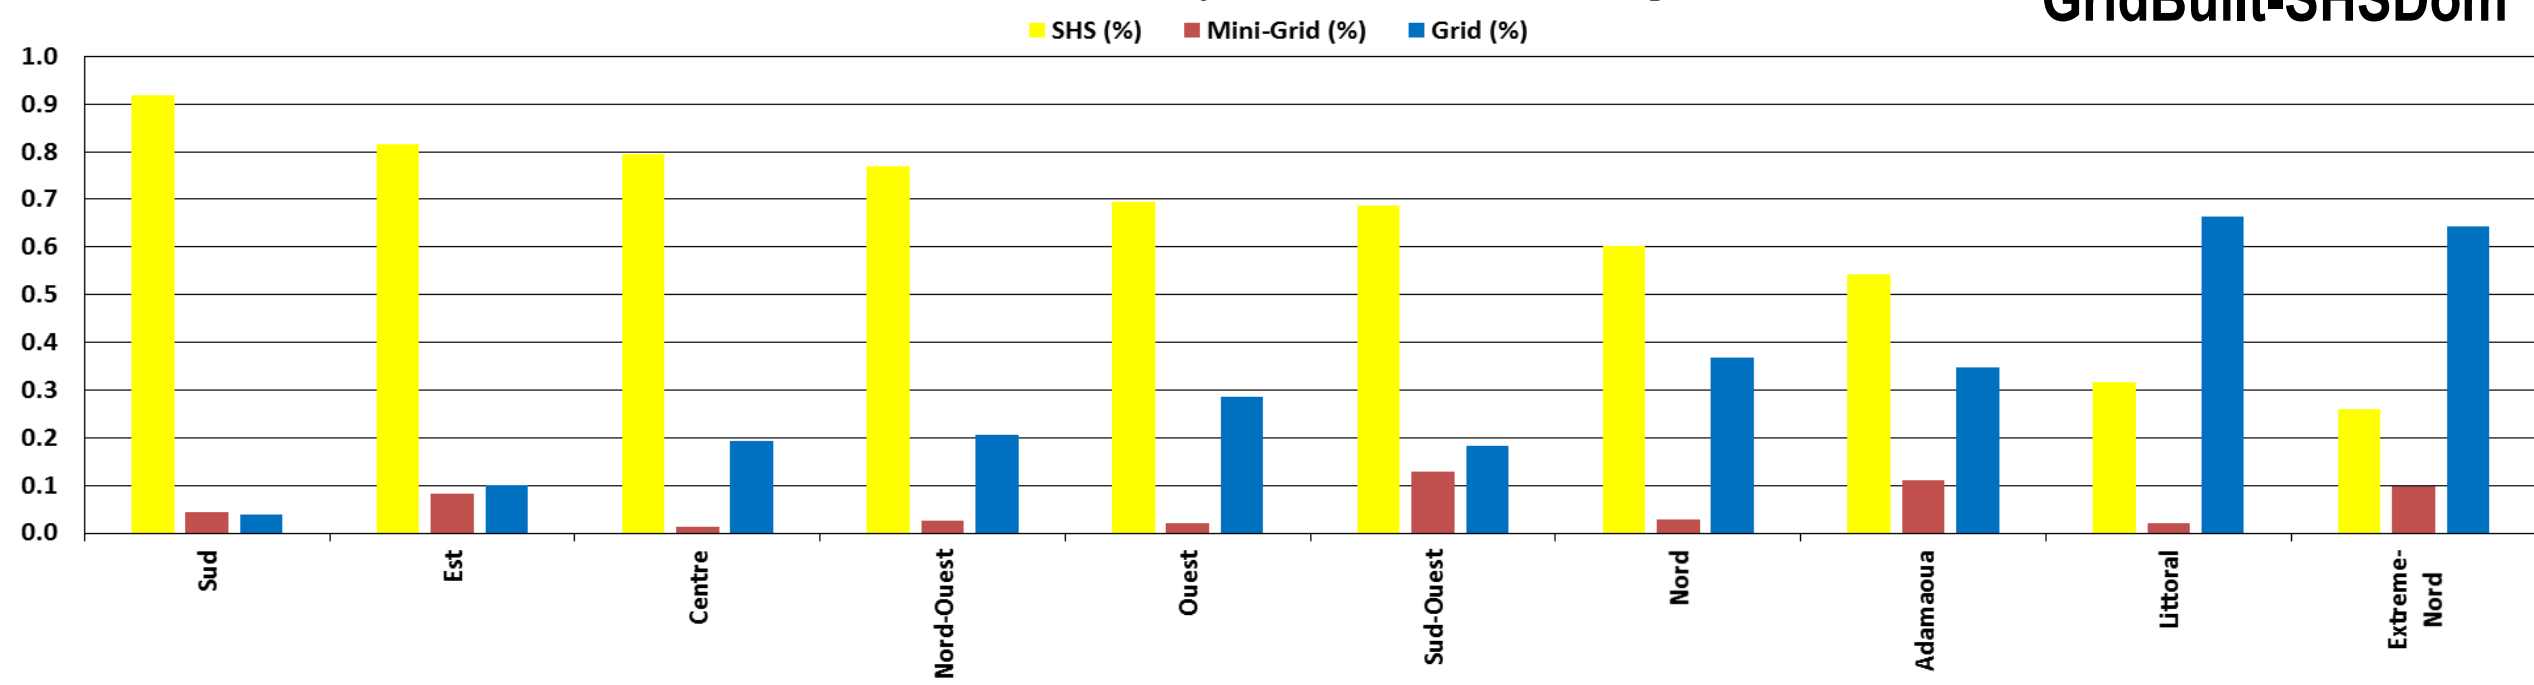

# Electrification option in all Cameroonian regions: GridPlanned-GridDom

## Electrification options of Cameroonian regions

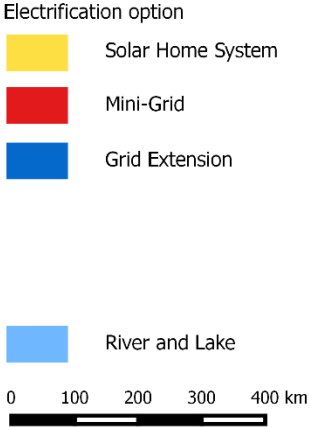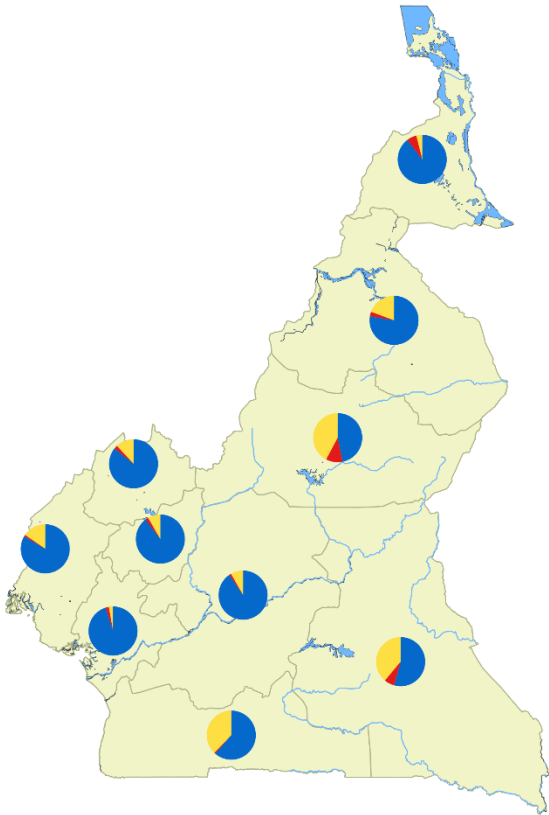

## Electrification options of Cameroonian regions

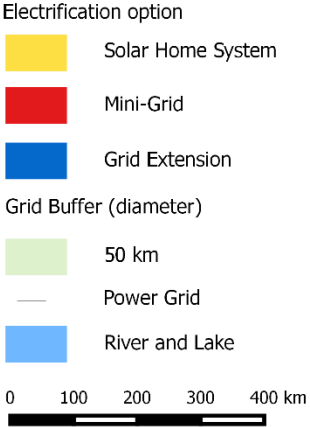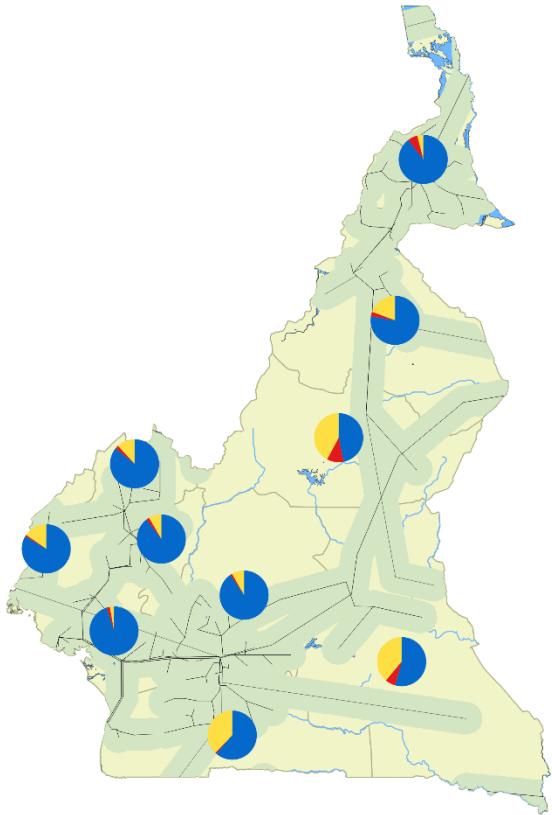

# Electrification option in all Cameroonian regions: GridPlanned-SHSDom

## Electrification options of Cameroonian regions

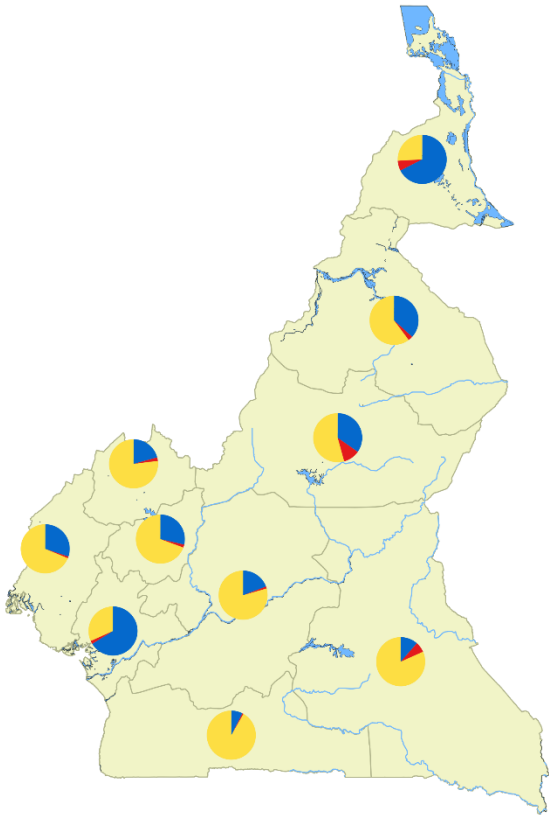

## Electrification options of Cameroonian regions

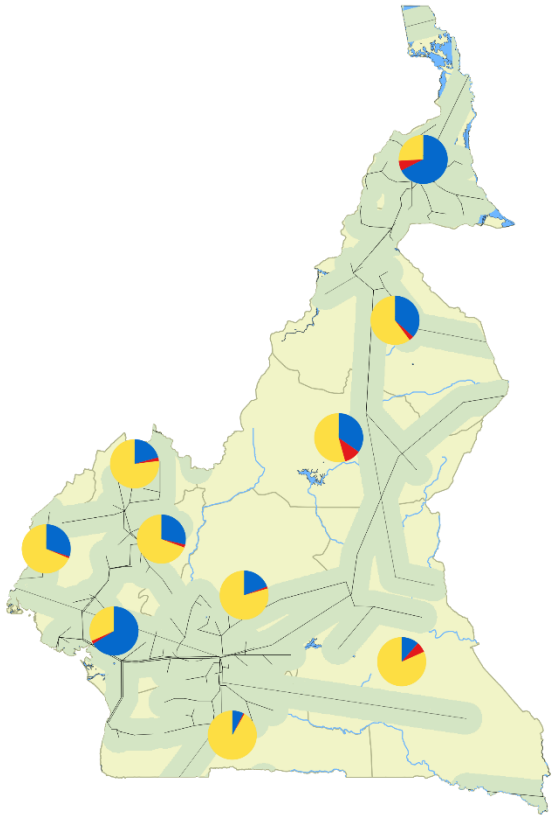

# Electrification option: GridPlanned-SHSDom

# Electrification option: GridPlanned-GridDom

Electrification options of Cameroonian regions

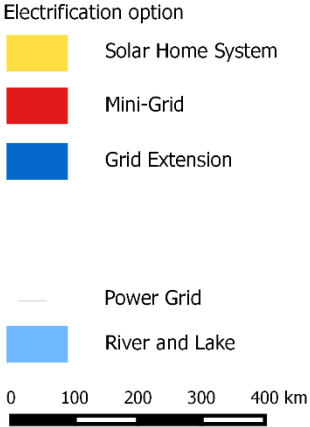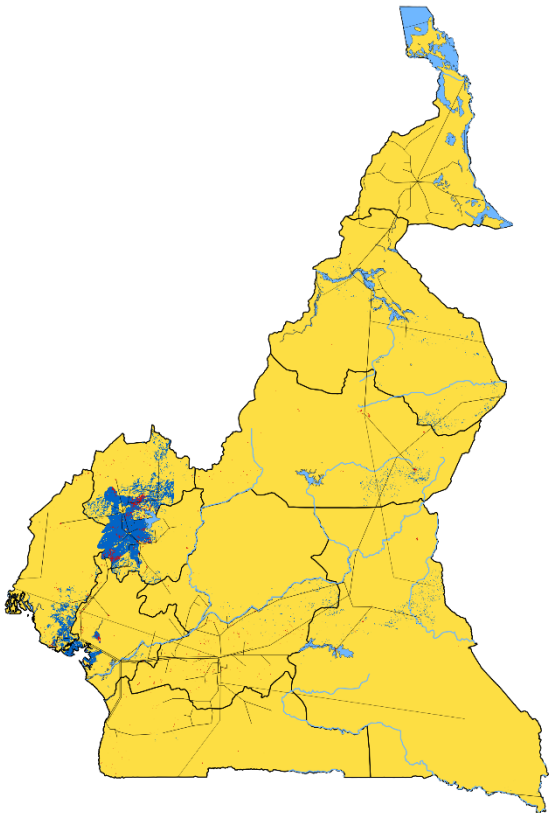

Electrification options of Cameroonian regions

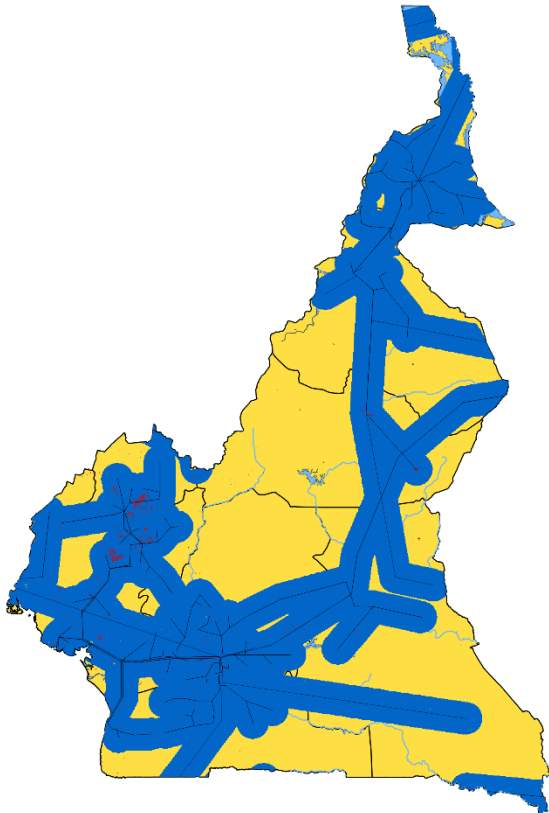

Share of electrification options in all Cameroonian regions

SHS (%) Mini-Grid (%) Grid (%)

GridPlanned-GridDom

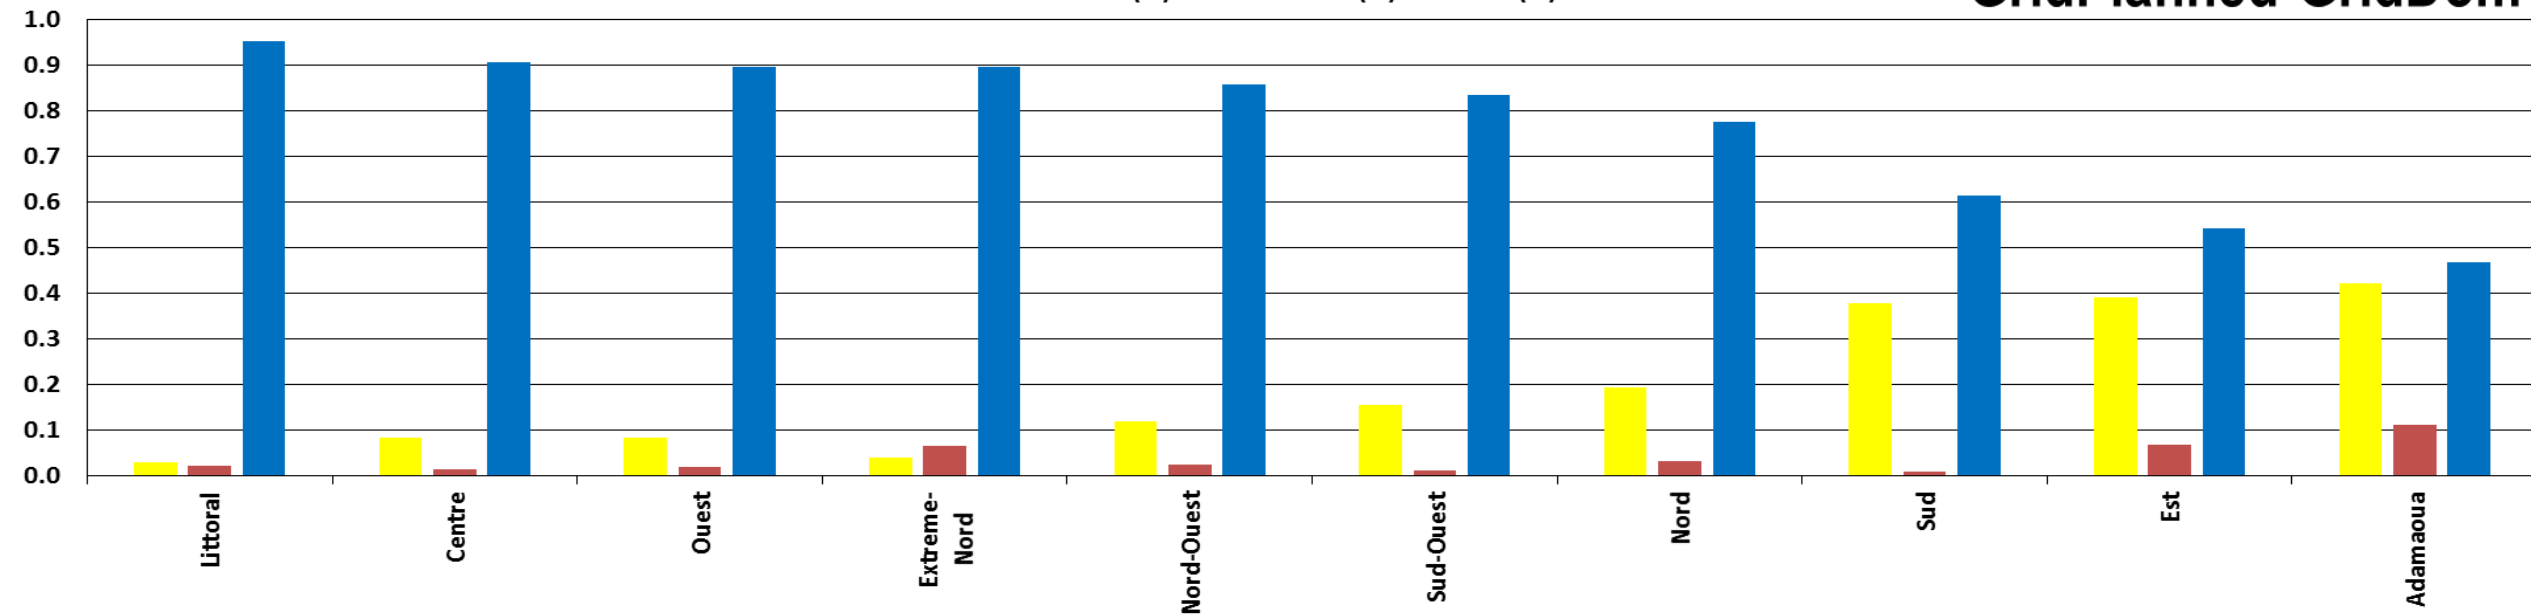

Share of electrification options in all Cameroonian regions

SHS (%) Mini-Grid (%) Grid (%)

GridPlanned-SHSDom

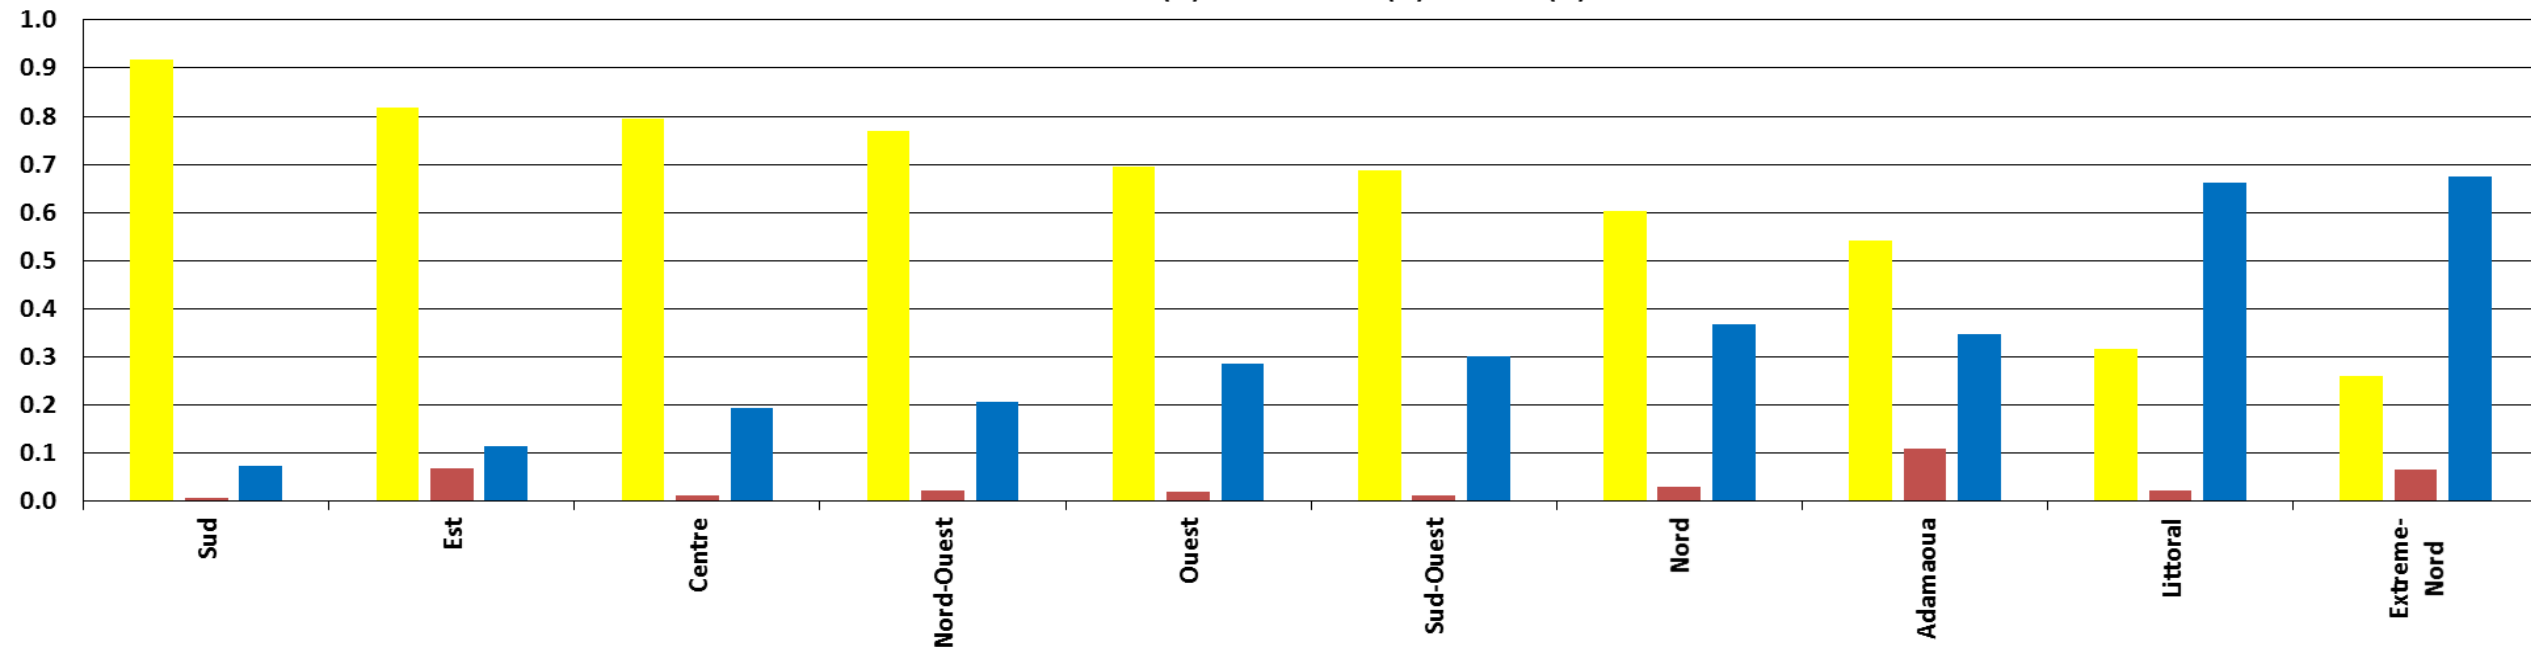

# Central African Republic

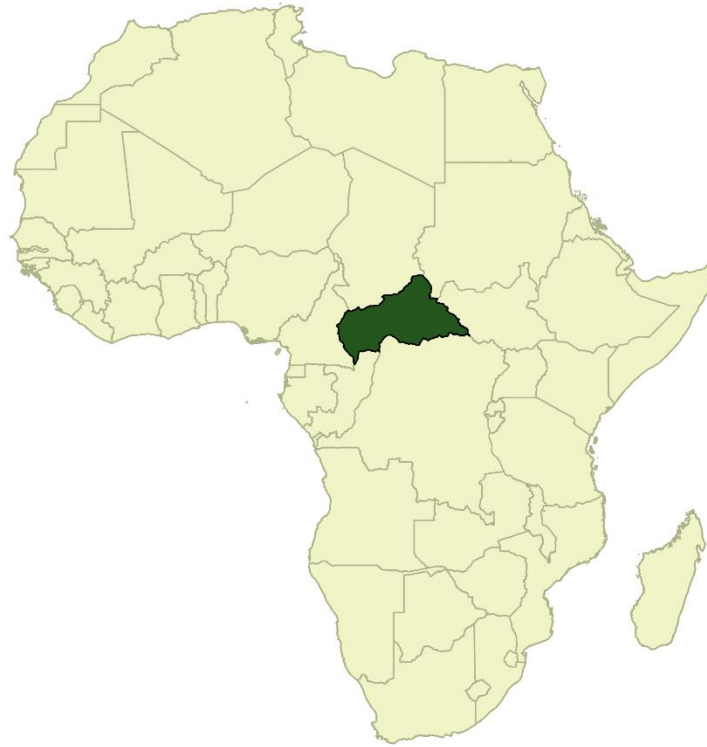

# Night light emission and Population of Central African Republic regions

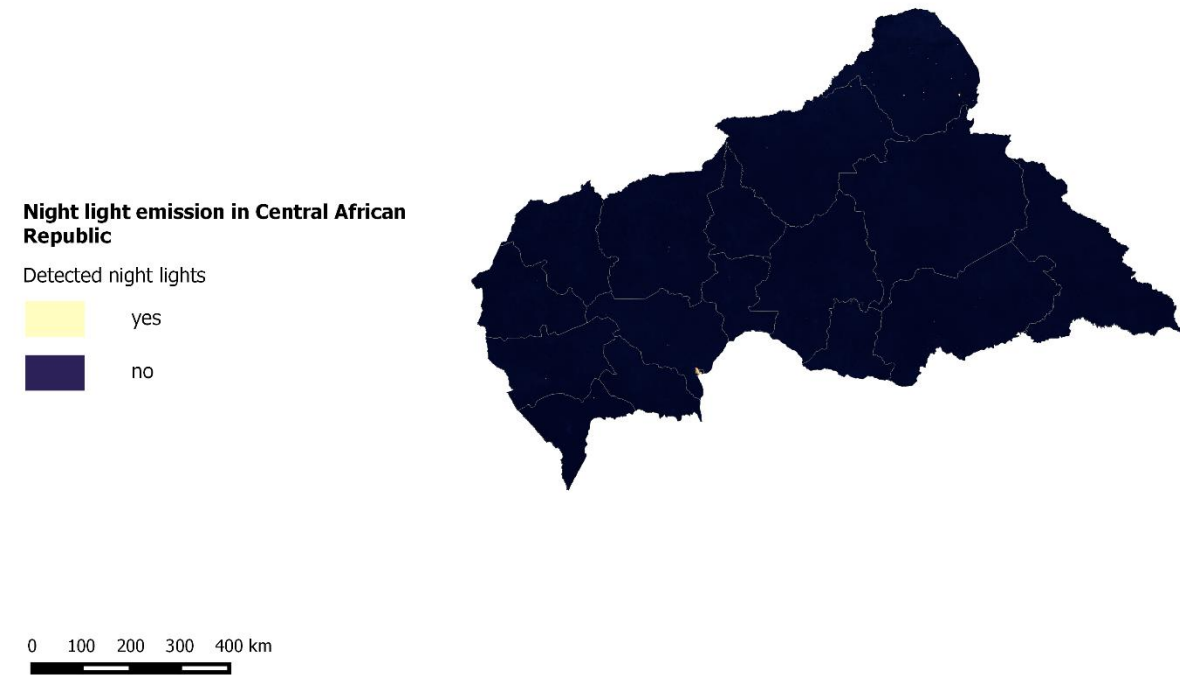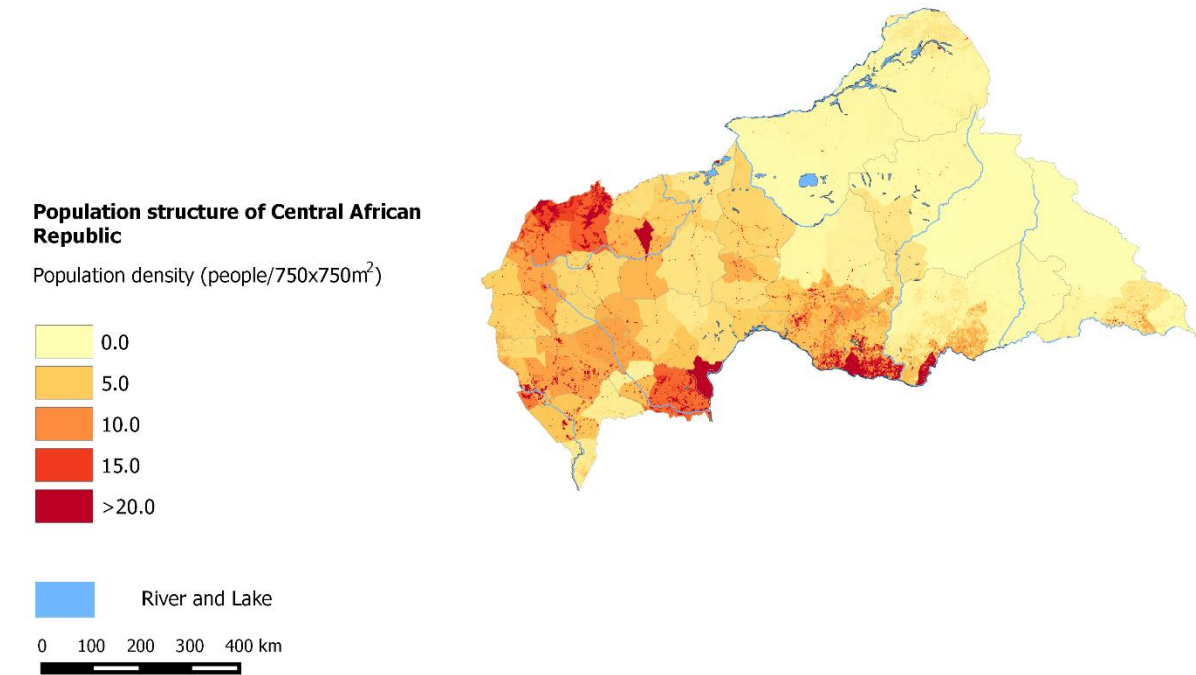

# Electrification option in all Central African Republic regions: GridBuilt-GridDom

## Electrification options of Central African Republic regions

- Electrification option
- Solar Home System
  - Mini-Grid
  - Grid Extension

River and Lake

0 100 200 300 400 km

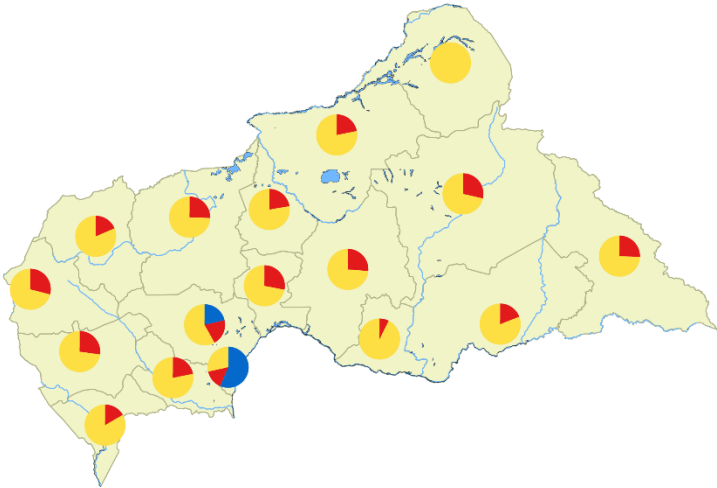

## Electrification options of Central African Republic regions

- Electrification option
- Solar Home System
  - Mini-Grid
  - Grid Extension

Grid Buffer (diameter)

50 km

Power Grid

River and Lake

0 100 200 300 400 km

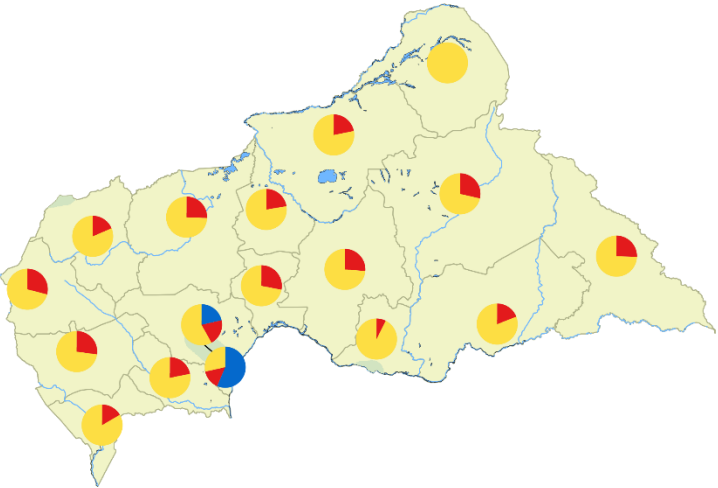

# Electrification option in all Central African Republic regions: GridBuilt-SHSDom

**Electrification options of Central African Republic regions**

- Electrification option
- Solar Home System
  - Mini-Grid
  - Grid Extension

River and Lake

0 100 200 300 400 km

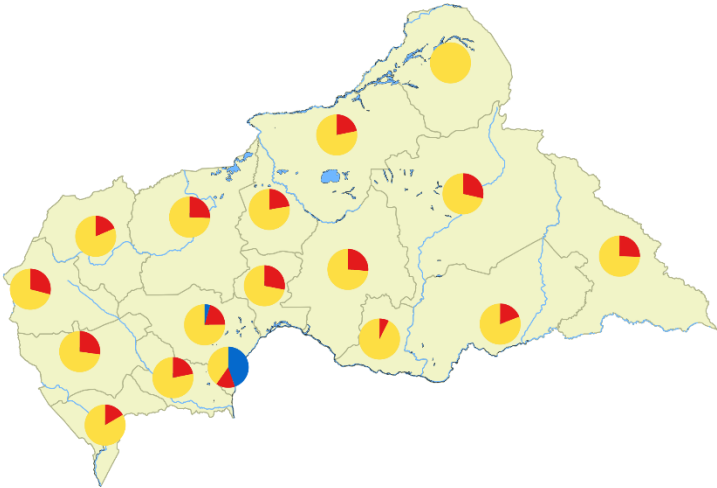

**Electrification options of Central African Republic regions**

- Electrification option
- Solar Home System
  - Mini-Grid
  - Grid Extension

Grid Buffer (diameter)

- 50 km
- Power Grid
- River and Lake

0 100 200 300 400 km

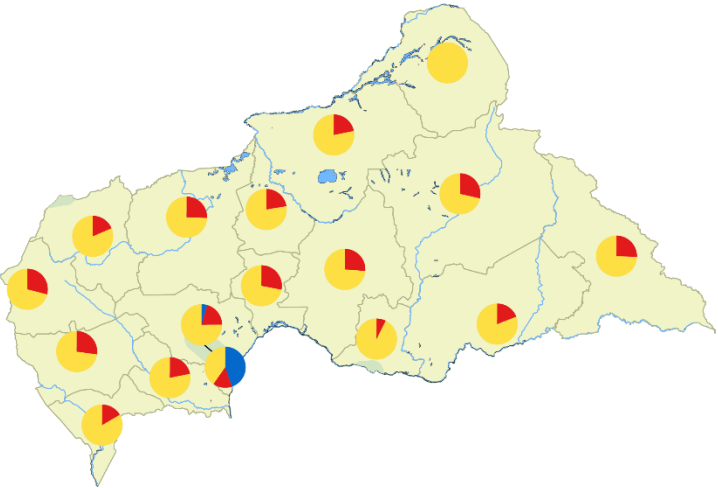

# Electrification option: GridBuilt-SHSDom

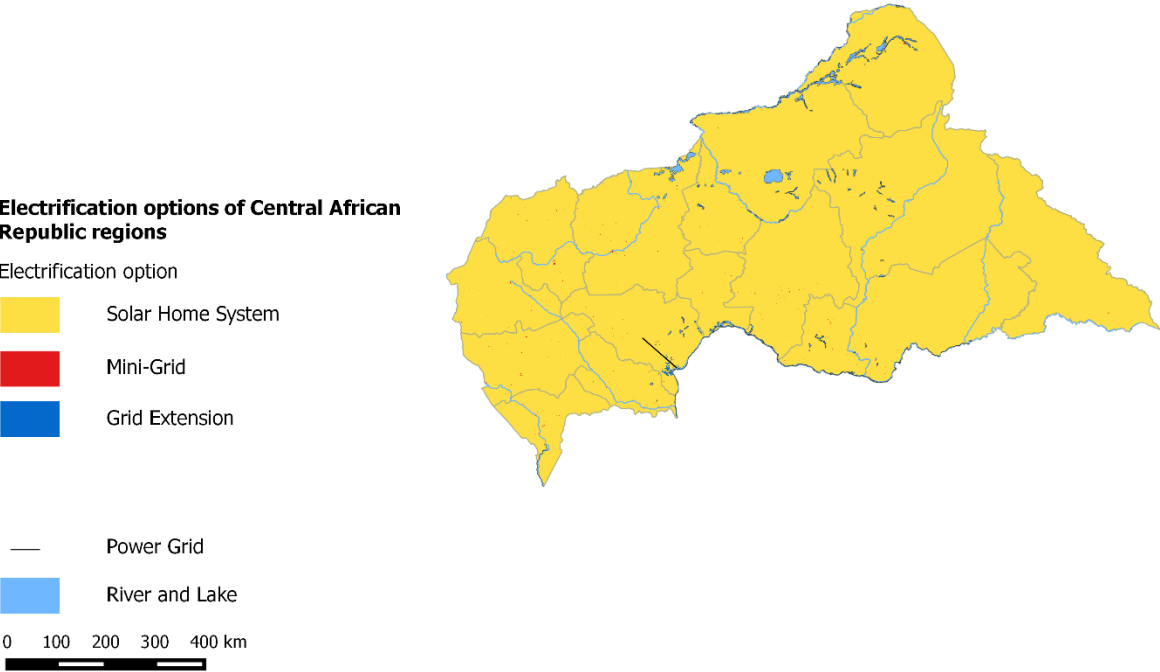

# Electrification option: GridBuilt-GridDom

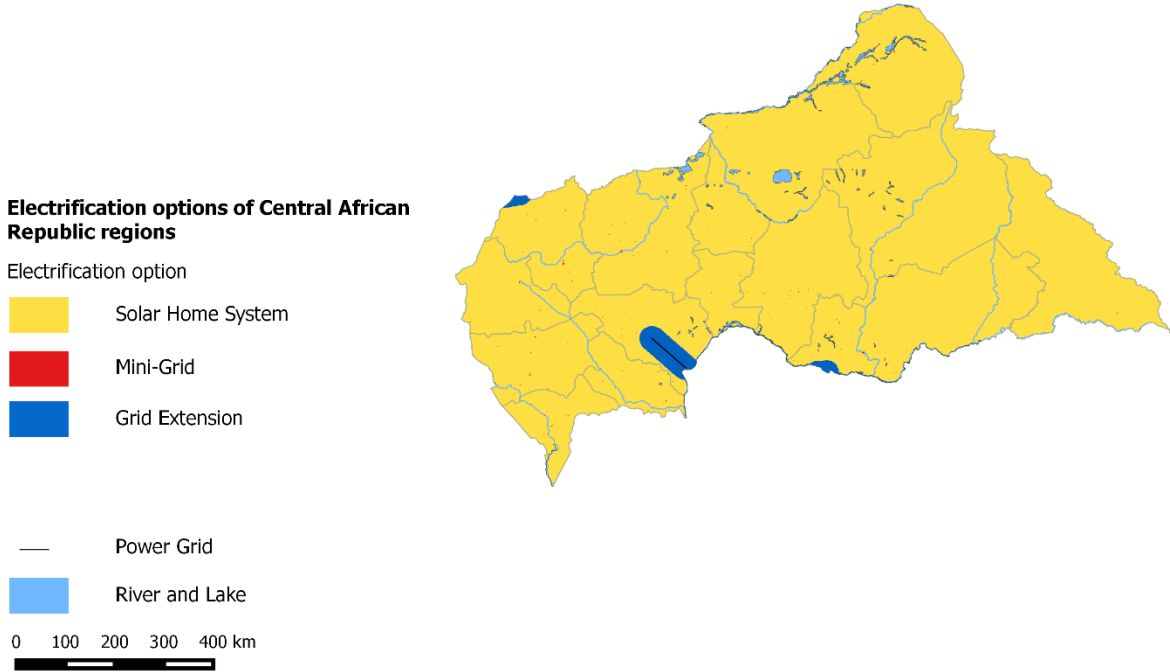

Share of electrification options in all Central African Republic regions

SHS (%) Mini-Grid (%) Grid (%)

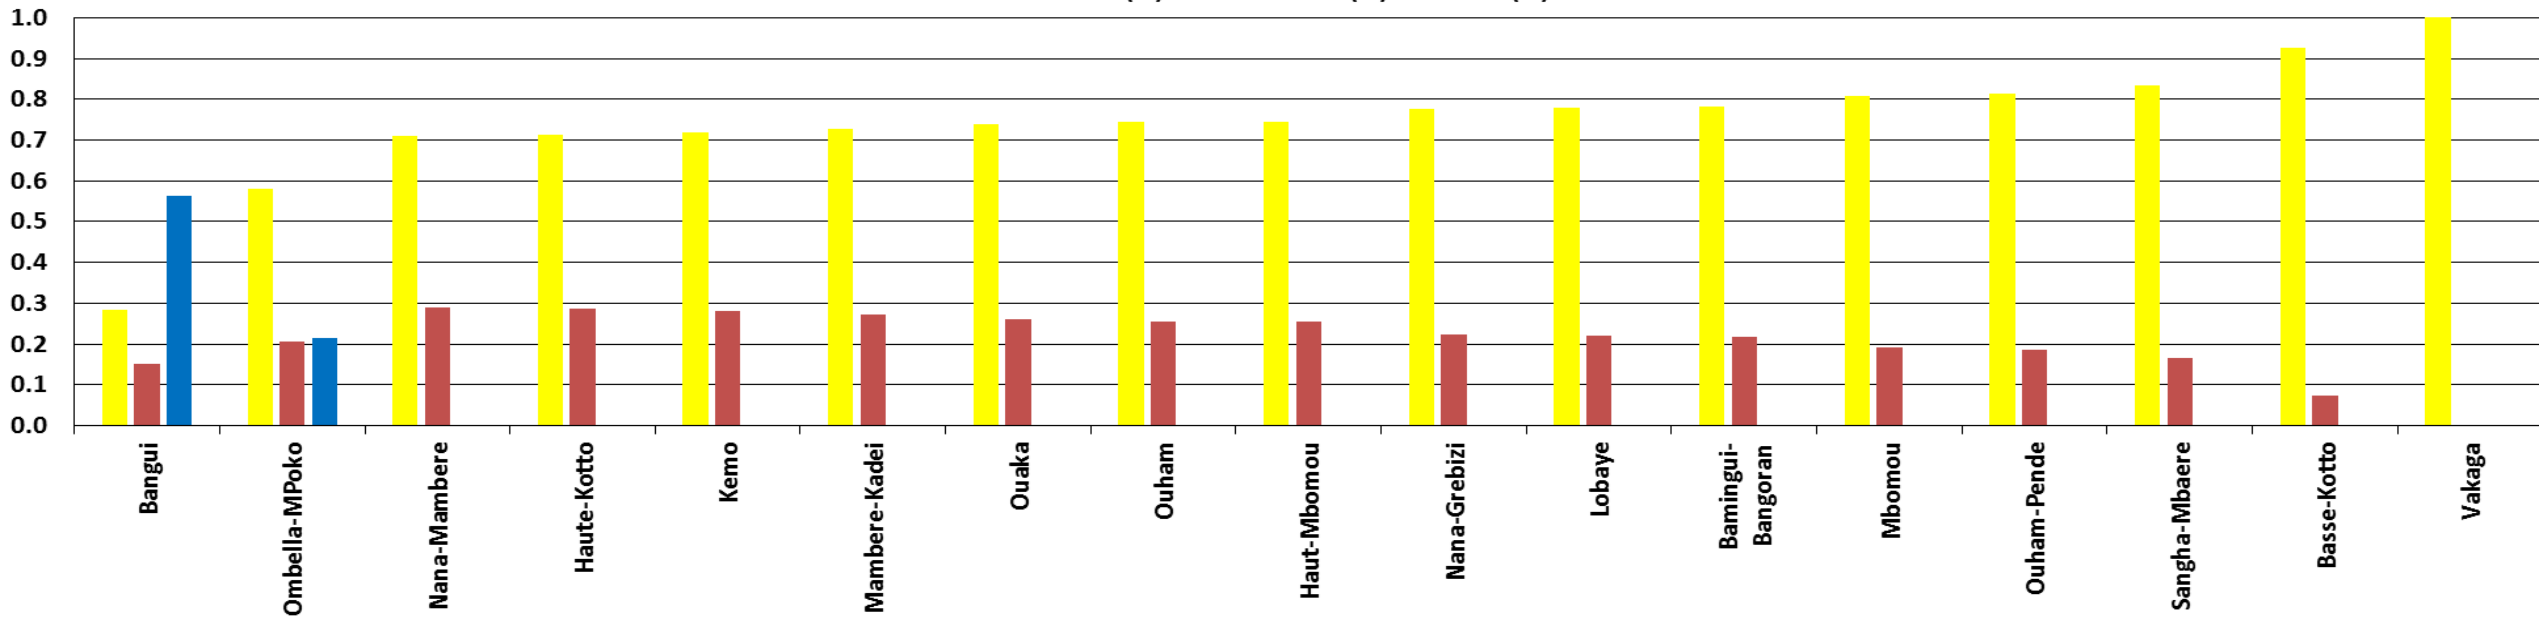

GridBuilt-GridDom

Share of electrification options in all Central African Republic regions

SHS (%) Mini-Grid (%) Grid (%)

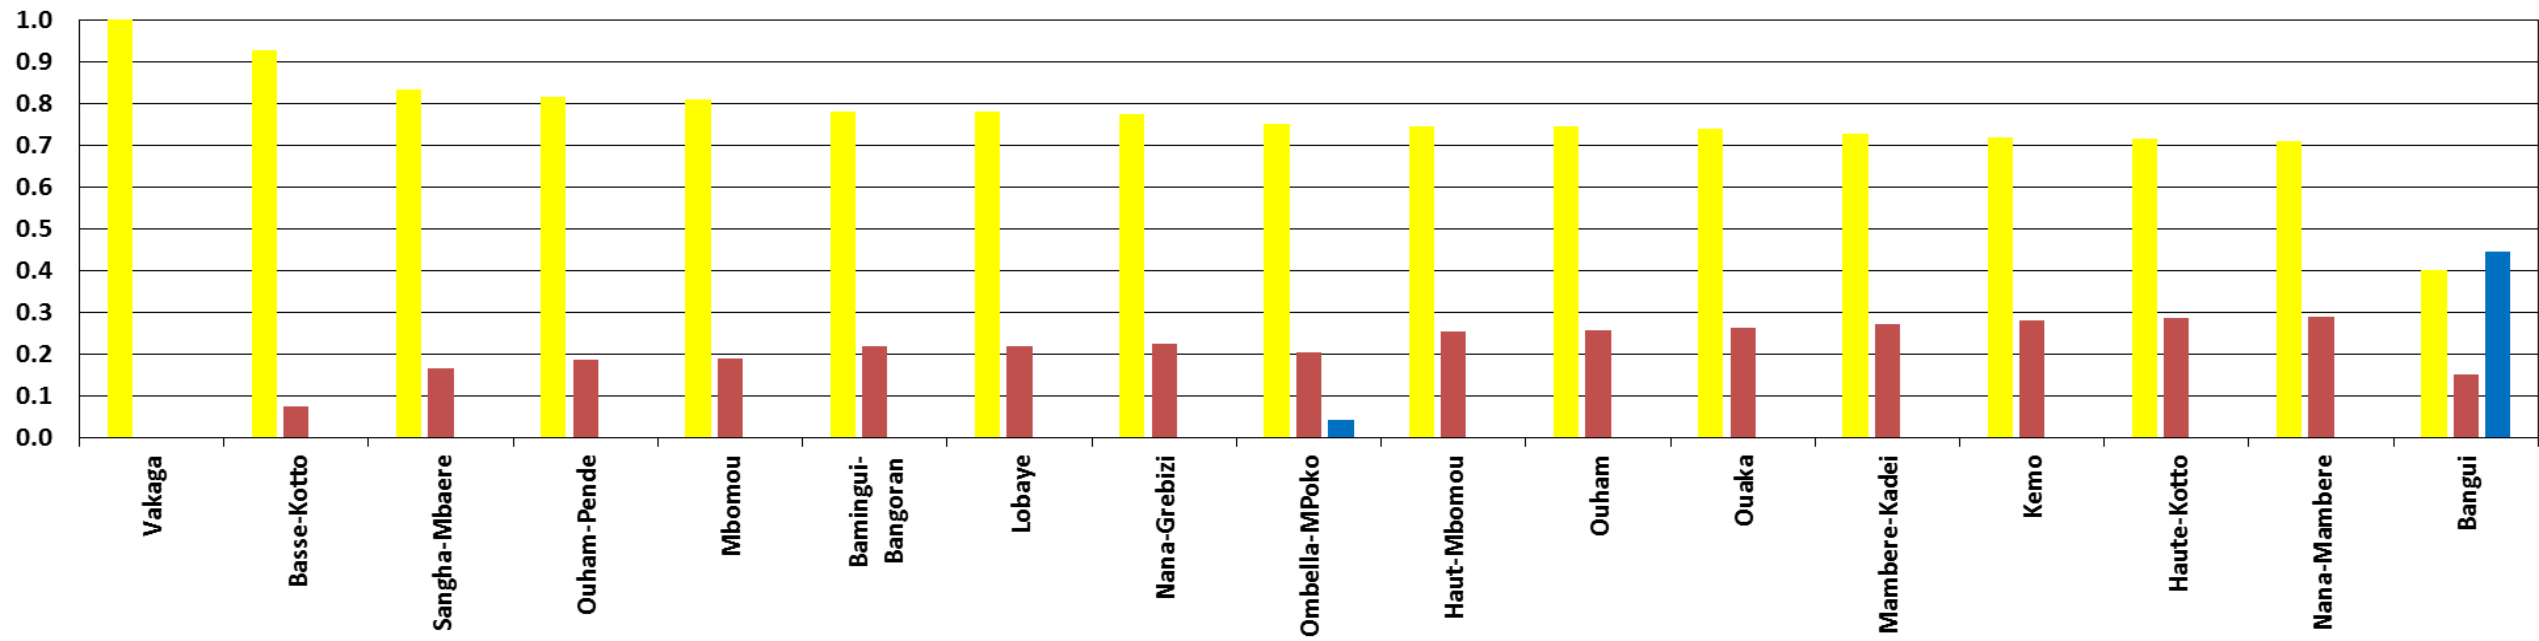

GridBuilt-SHSDom

# Electrification option in all Central African Republic regions: GridPlanned-GridDom

**Electrification options of Central African Republic regions**

- Electrification option
- Solar Home System
  - Mini-Grid
  - Grid Extension

River and Lake

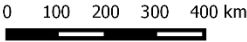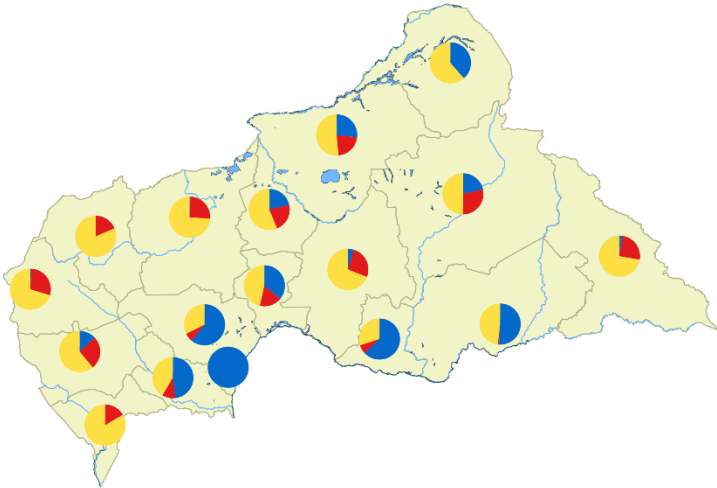

**Electrification options of Central African Republic regions**

- Electrification option
- Solar Home System
  - Mini-Grid
  - Grid Extension

Grid Buffer (diameter)

- 50 km
- Power Grid
- River and Lake

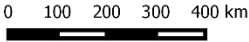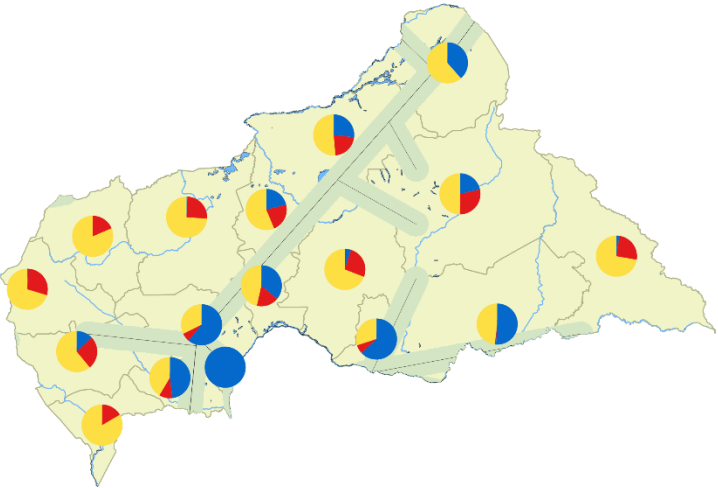

# Electrification option in all Central African Republic regions: GridPlanned-SHSDom

**Electrification options of Central African Republic regions**

- Electrification option
- Solar Home System
  - Mini-Grid
  - Grid Extension

River and Lake

0 100 200 300 400 km

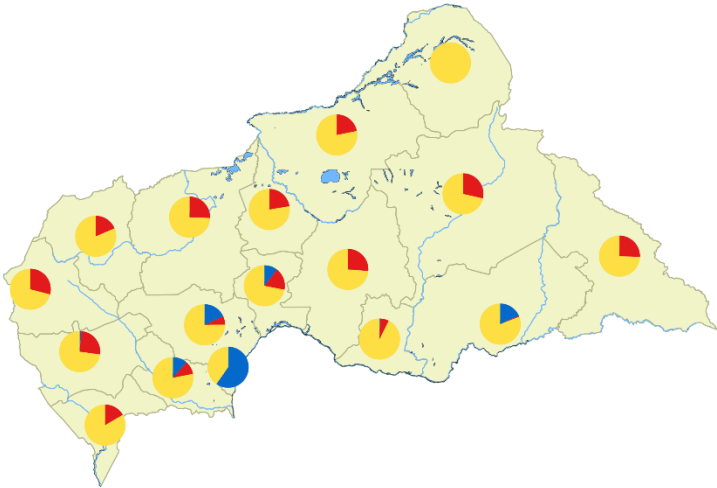

**Electrification options of Central African Republic regions**

- Electrification option
- Solar Home System
  - Mini-Grid
  - Grid Extension

Grid Buffer (diameter)

- 50 km
- Power Grid
- River and Lake

0 100 200 300 400 km

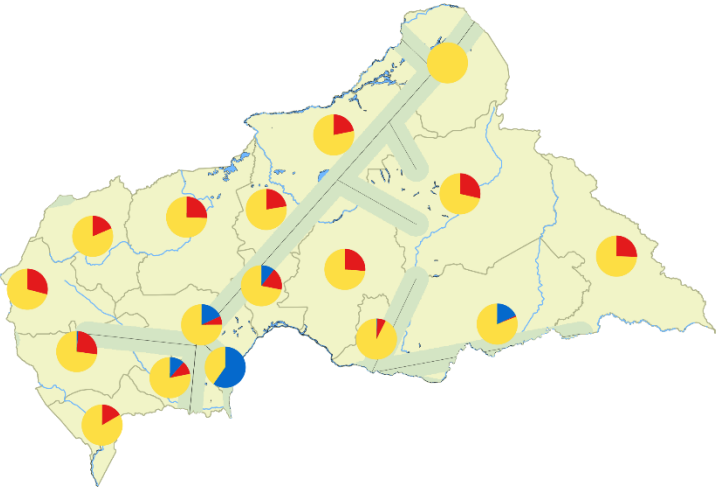

# Electrification option: GridPlanned-SHSDom

# Electrification option: GridPlanned-GridDom

**Electrification options of Central African  
Republic regions**

- Electrification option
- Solar Home System
  - Mini-Grid
  - Grid Extension

- Power Grid
- River and Lake

0 100 200 300 400 km

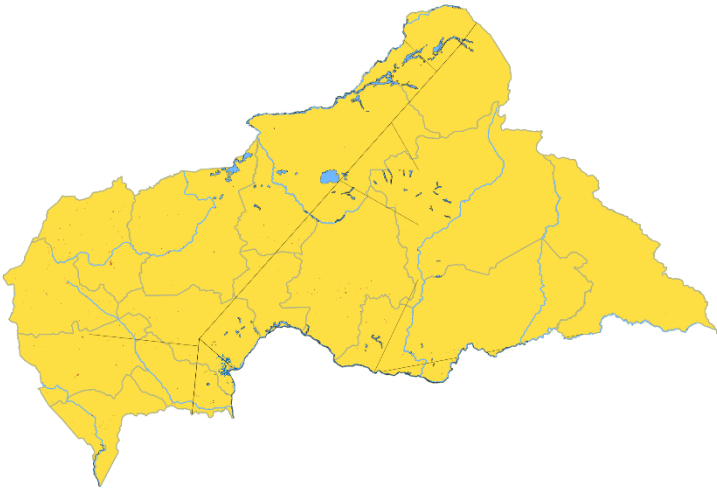

**Electrification options of Central African  
Republic regions**

- Electrification option
- Solar Home System
  - Mini-Grid
  - Grid Extension

- Power Grid
- River and Lake

0 100 200 300 400 km

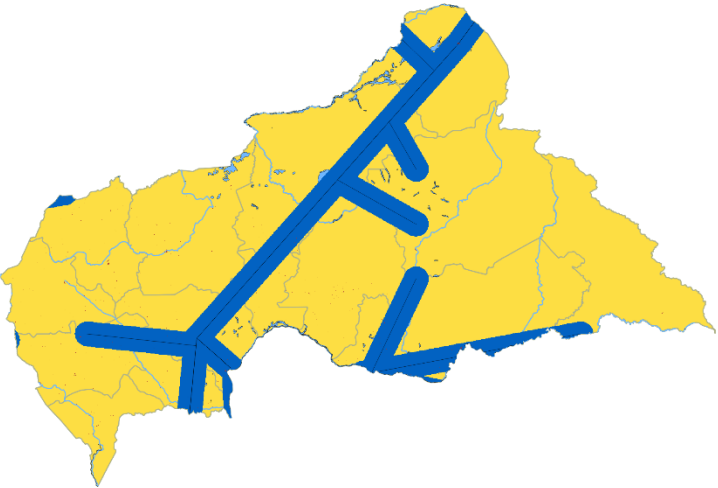

Share of electrification options in all Central African Republic regions

SHS (%) Mini-Grid (%) Grid (%)

GridPlanned-GridDom

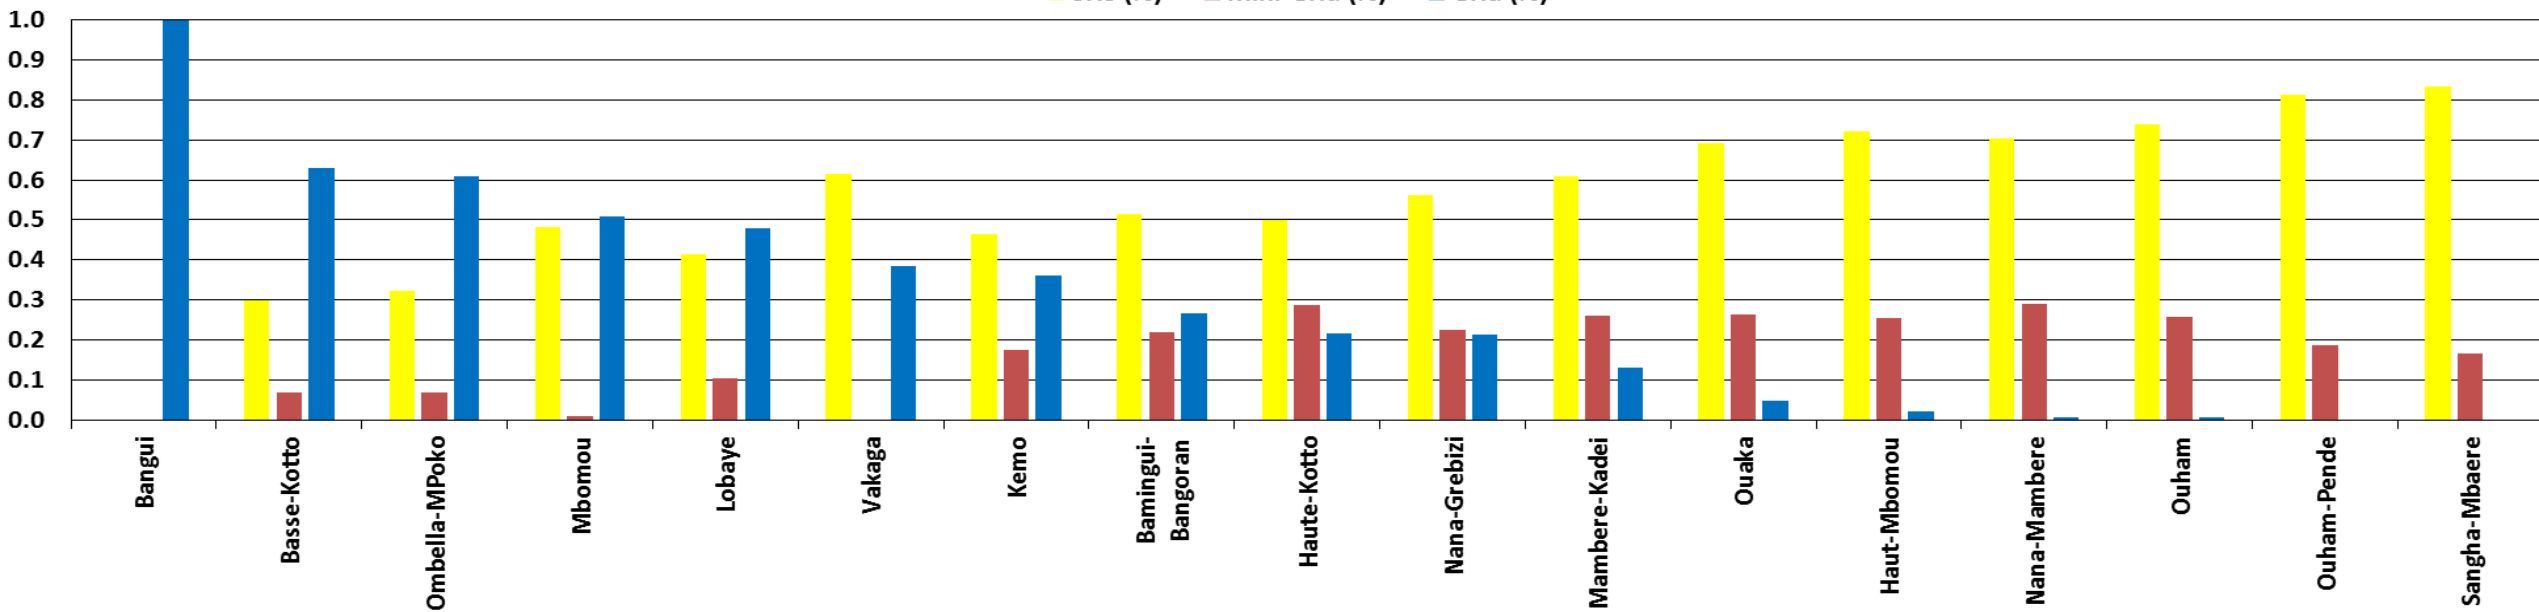

Share of electrification options in all Central African Republic regions

SHS (%) Mini-Grid (%) Grid (%)

GridPlanned-SHSDom

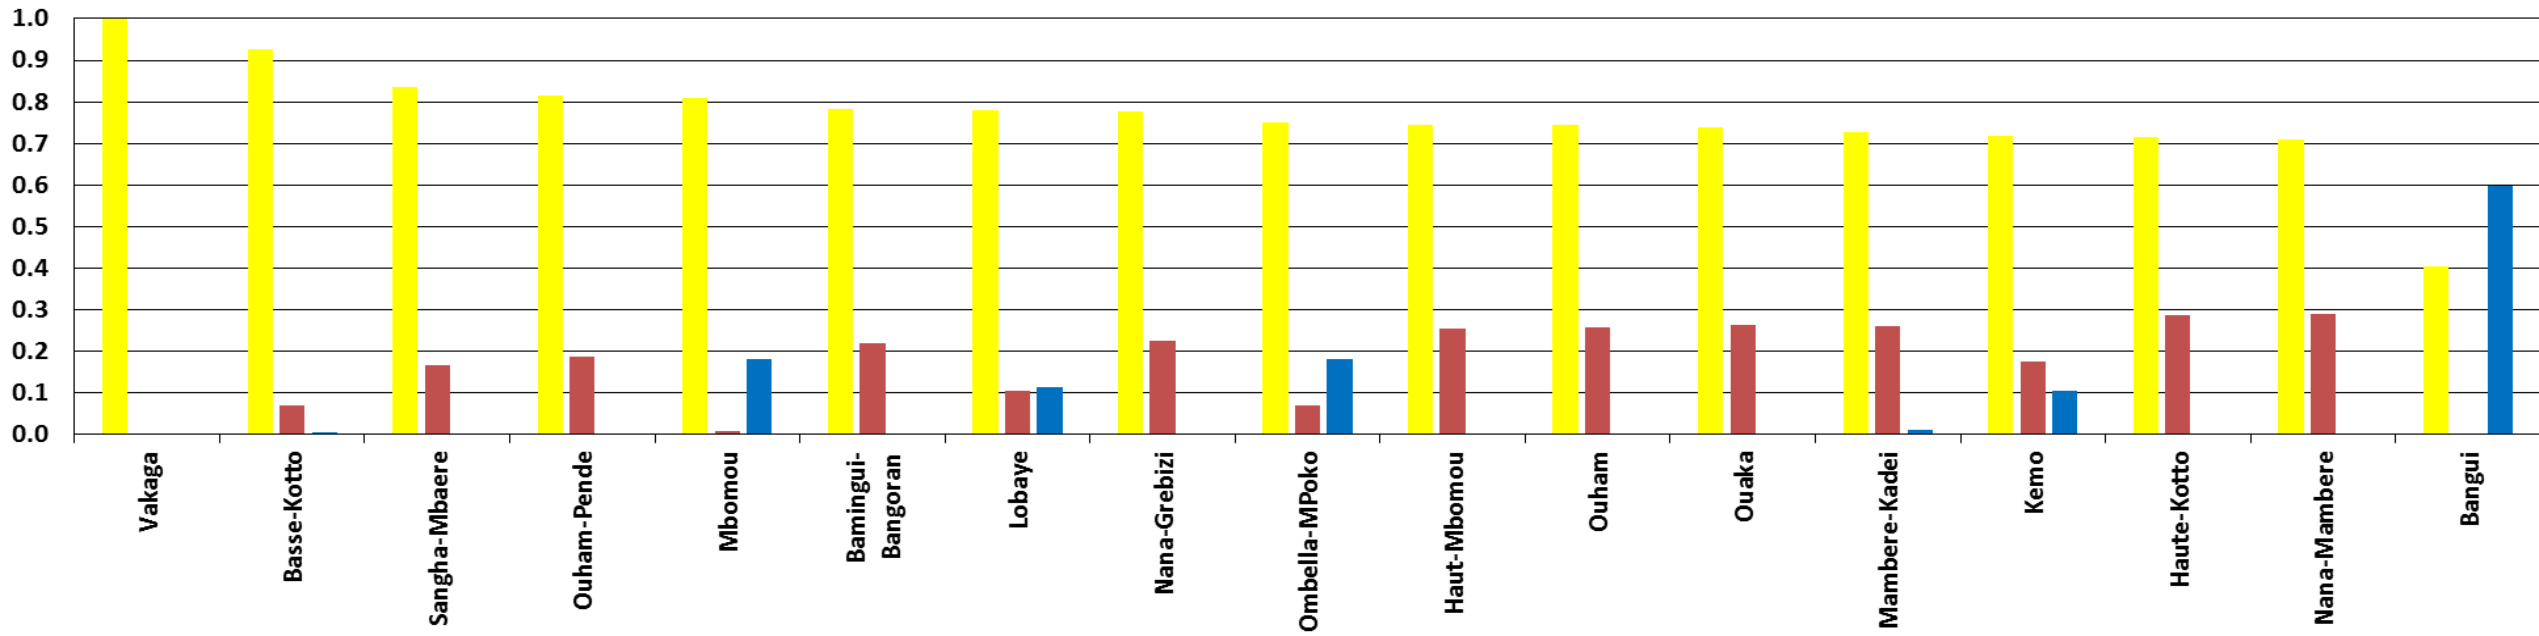

# Chad

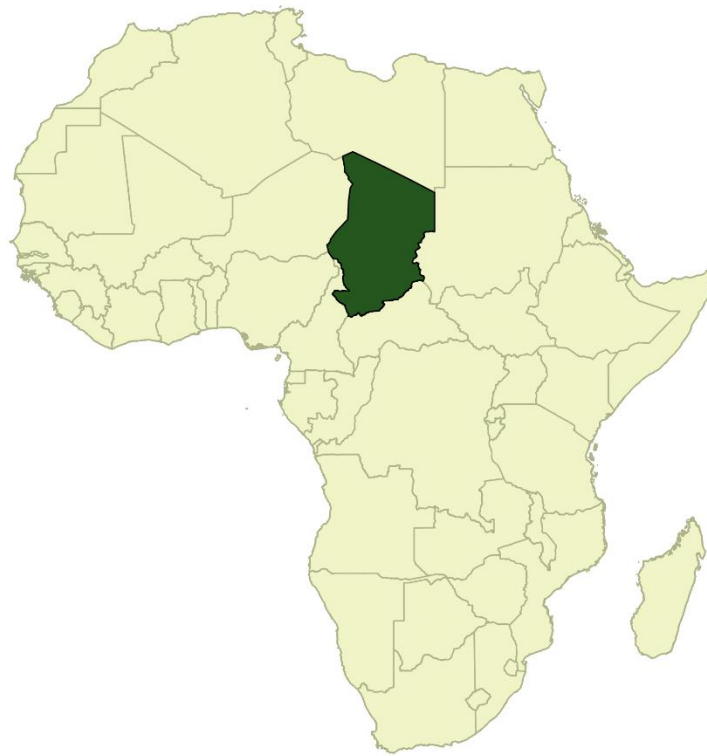

# Night light emission and Population of Chadian regions

## Night light emission in Chad

Detected night lights

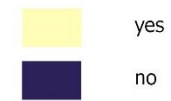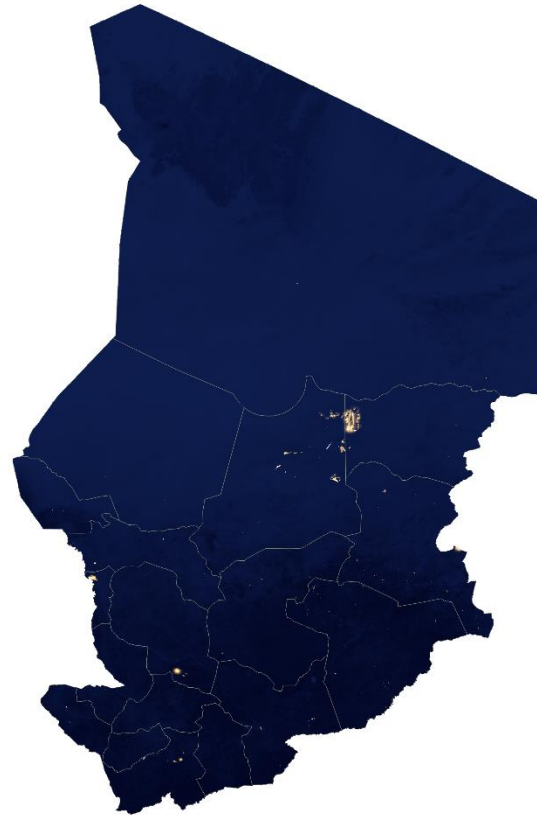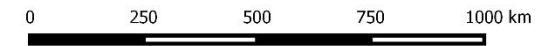

## Population structure of Chad

Population density (people/750x750m<sup>2</sup>)

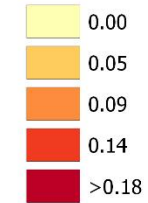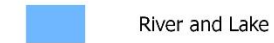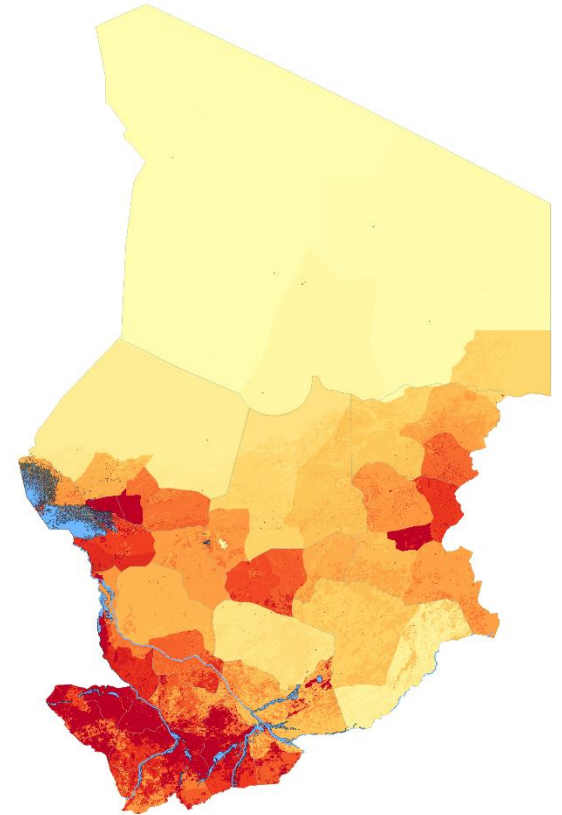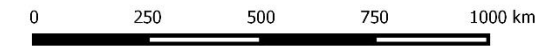

# Electrification option in all Chadian regions: GridBuilt-GridDom

## Electrification options of Chadian regions

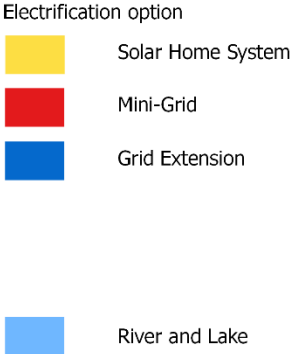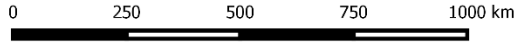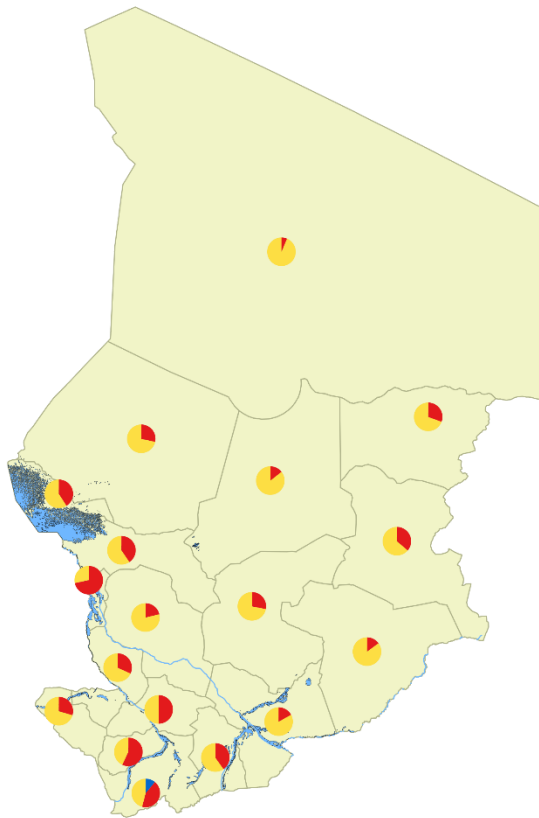

## Electrification options of Chadian regions

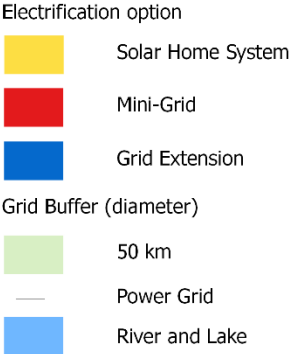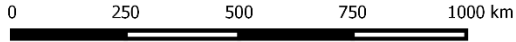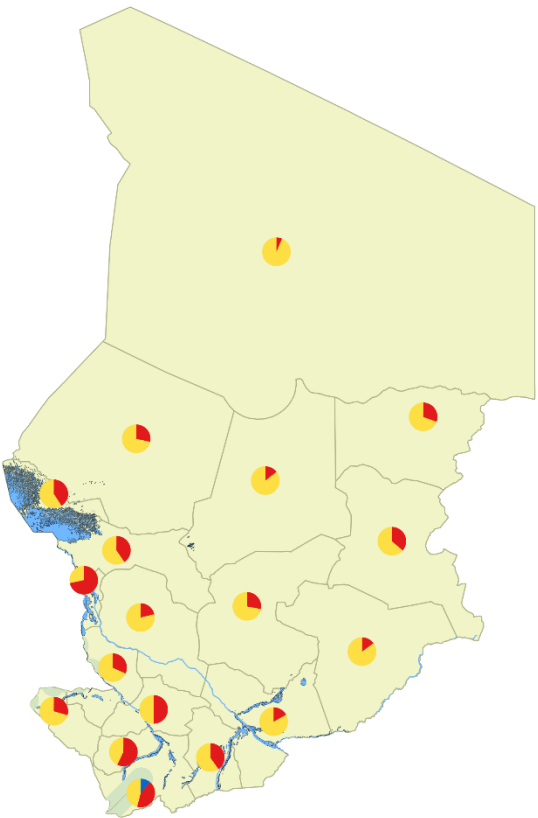

# Electrification option in all Chadian regions: GridBuilt-SHSDom

## Electrification options of Chadian regions

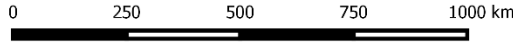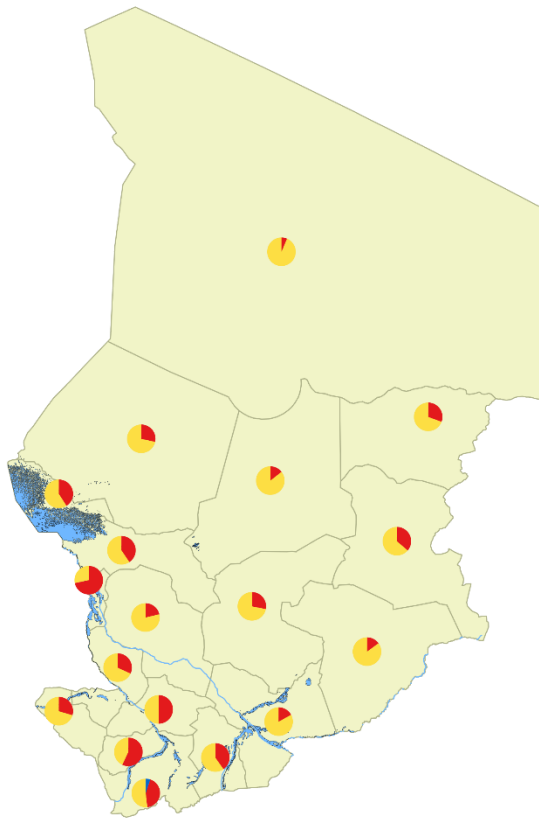

## Electrification options of Chadian regions

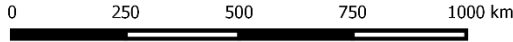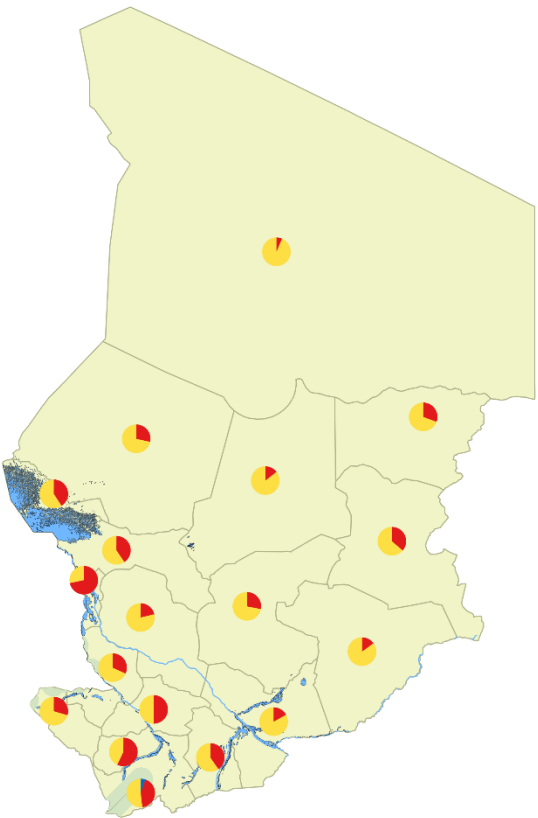

# Electrification option: GridBuilt-SHSDom

Electrification options of Chadian regions

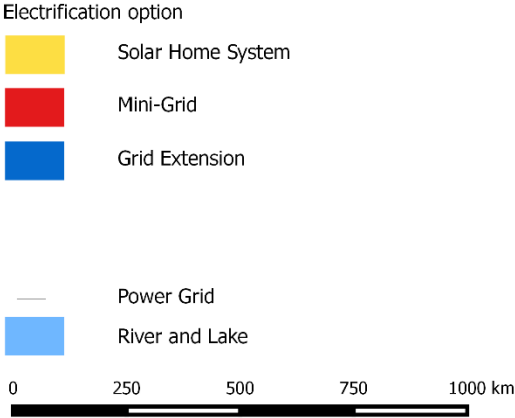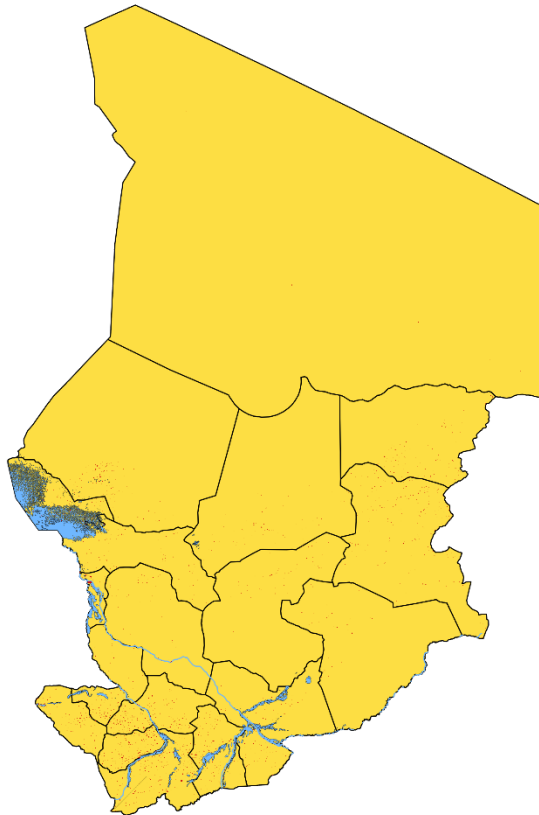

# Electrification option: GridBuilt-GridDom

Electrification options of Chadian regions

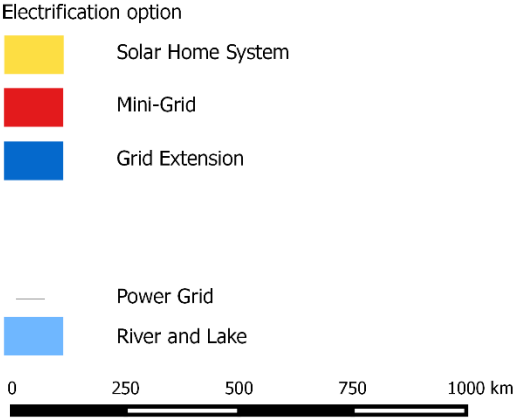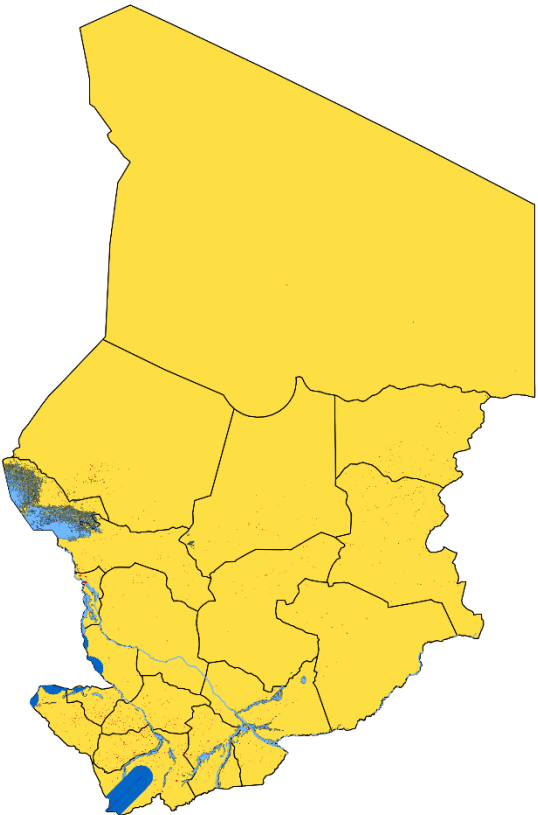

Share of electrification options in all Chadian regions

SHS (%) Mini-Grid (%) Grid (%)

GridBuilt-GridDom

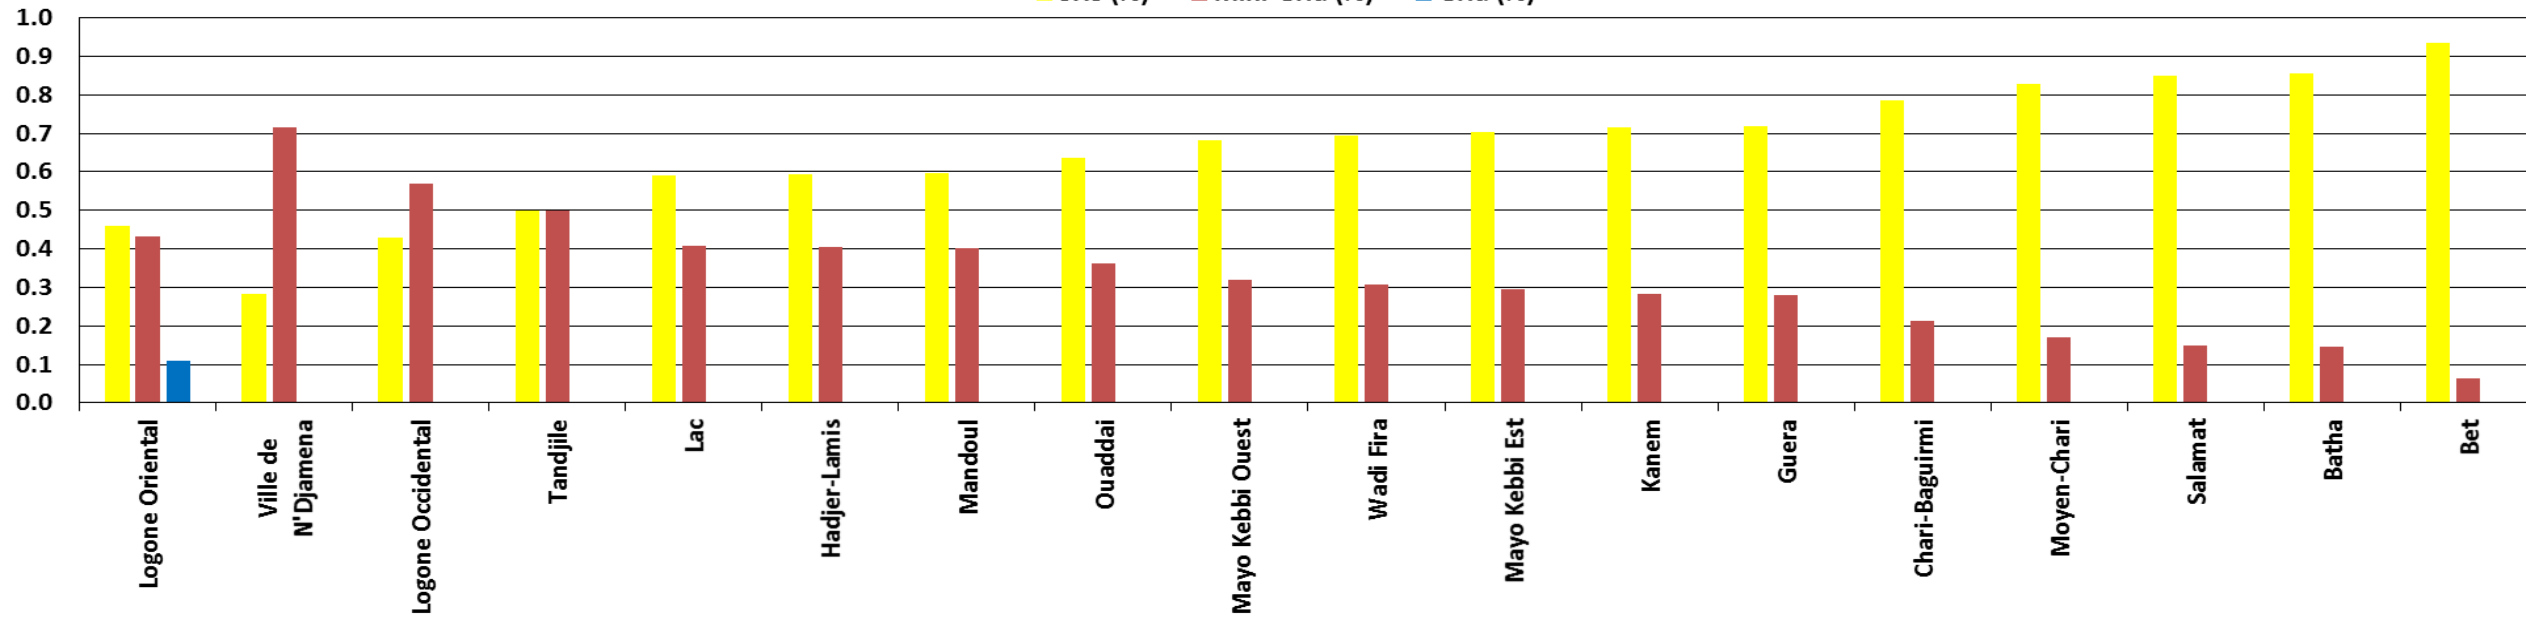

Share of electrification options in all Chadian regions

SHS (%) Mini-Grid (%) Grid (%)

GridBuilt-SHSDom

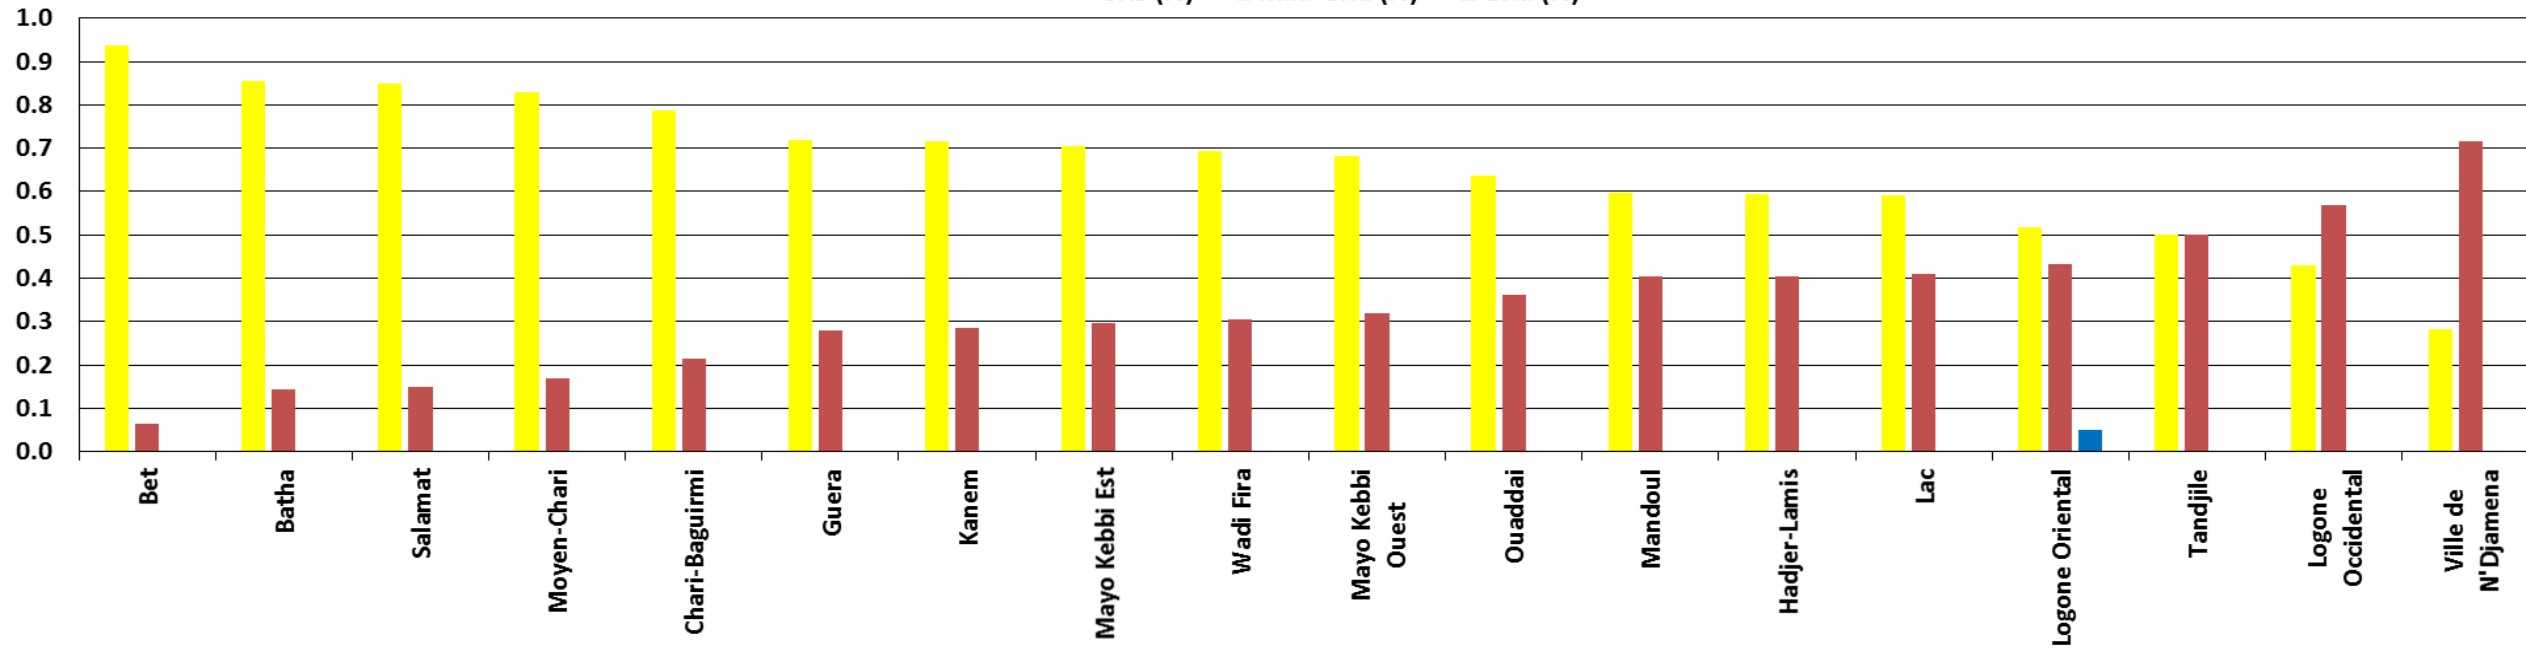

# Electrification option in all Chadian regions: GridPlanned-GridDom

Electrification options of Chadian regions

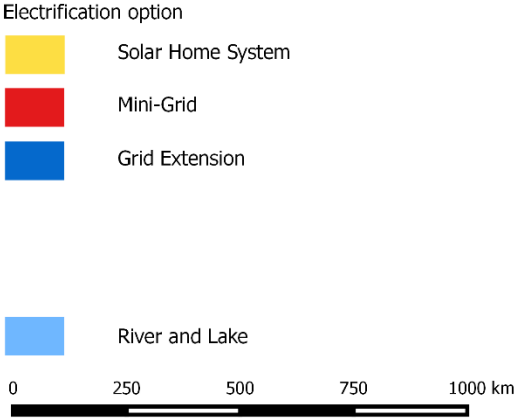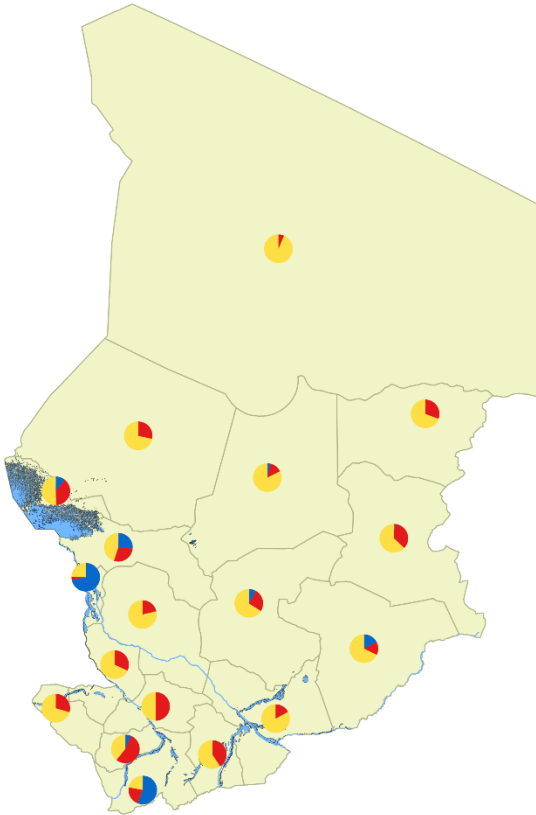

Electrification options of Chadian regions

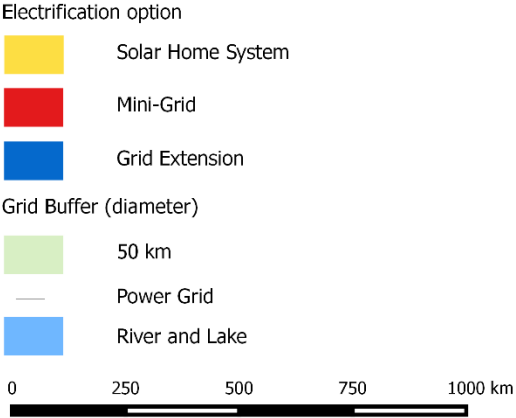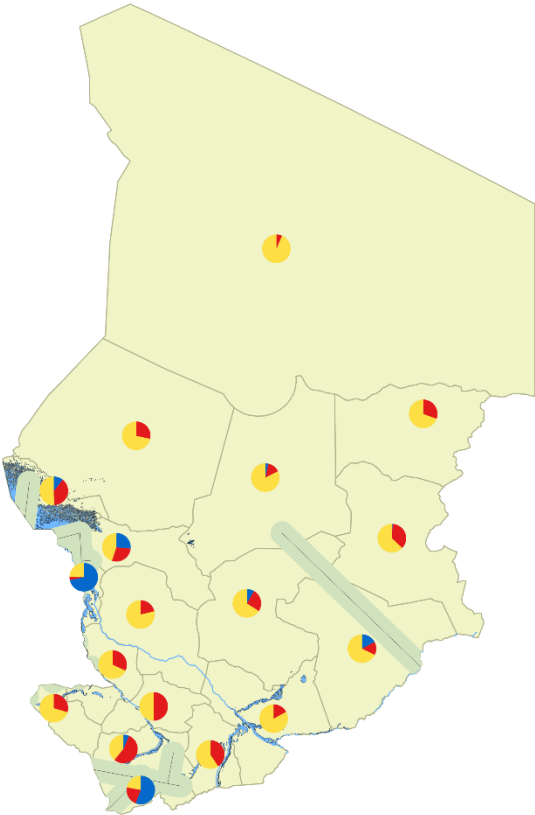

# Electrification option in all Chadian regions: GridPlanned-SHSDom

## Electrification options of Chadian regions

Electrification option

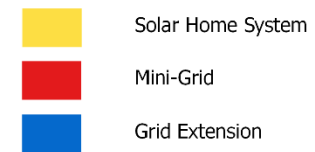

River and Lake

0 250 500 750 1000 km

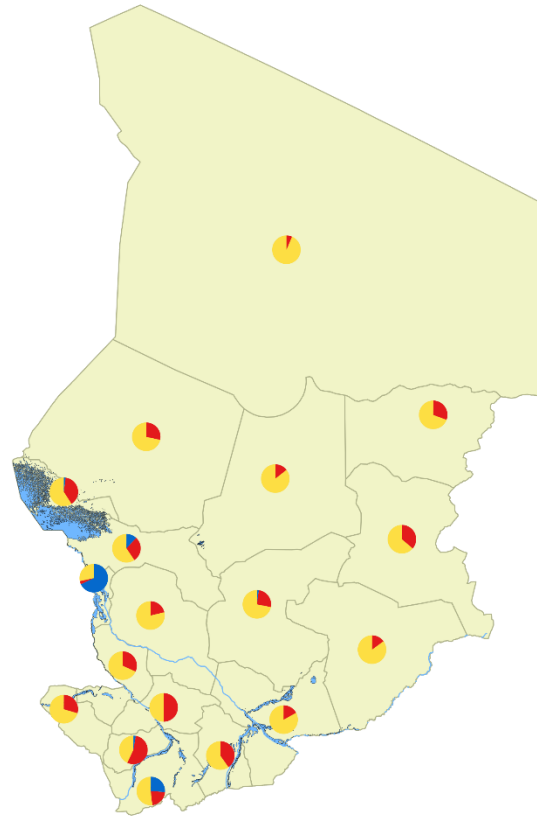

## Electrification options of Chadian regions

Electrification option

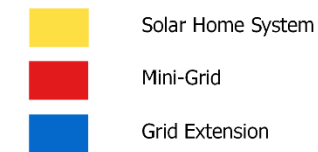

Grid Buffer (diameter)

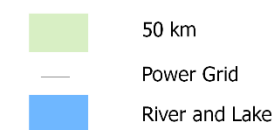

0 250 500 750 1000 km

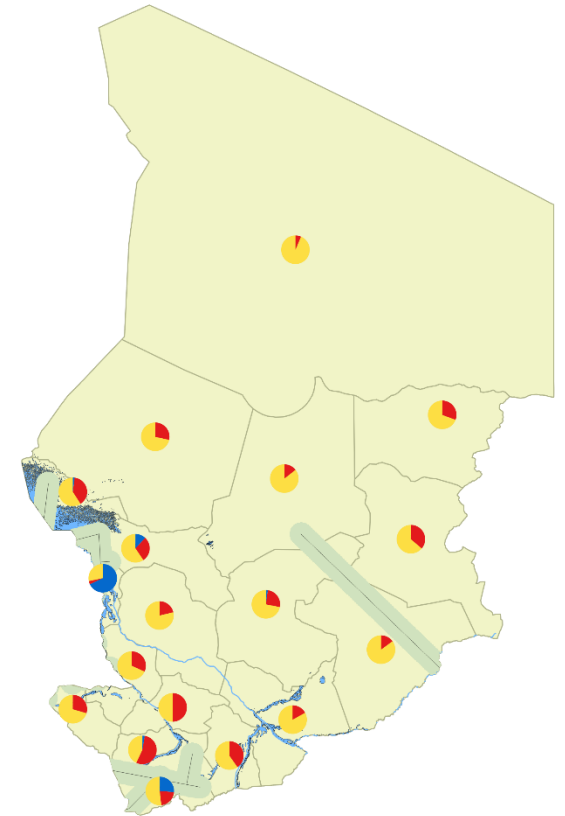

# Electrification option: GridPlanned-SHSDom

# Electrification option: GridPlanned-GridDom

Electrification options of Chadian regions

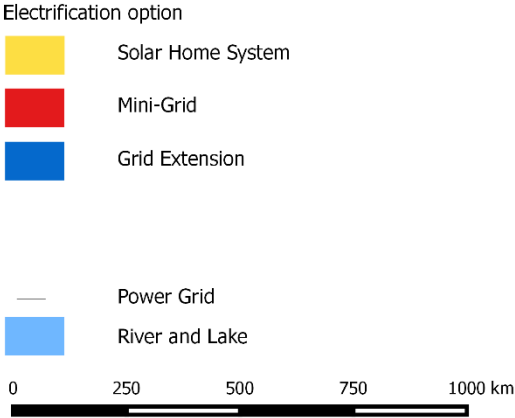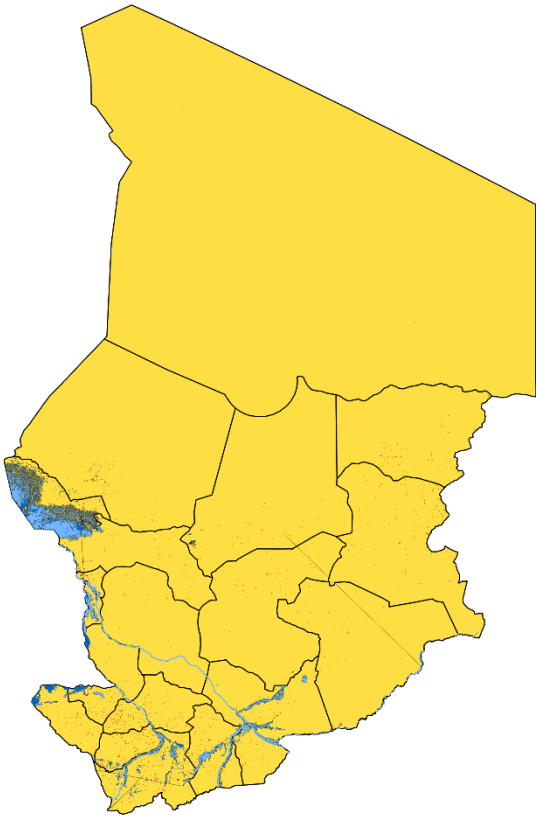

Electrification options of Chadian regions

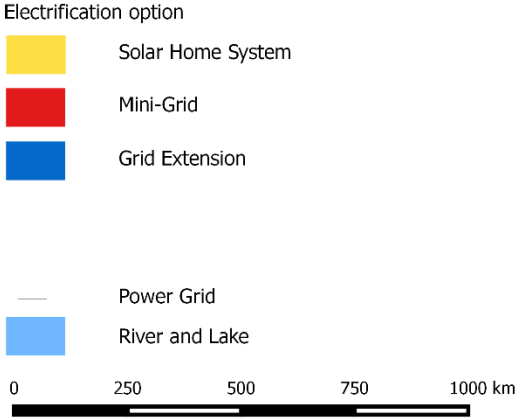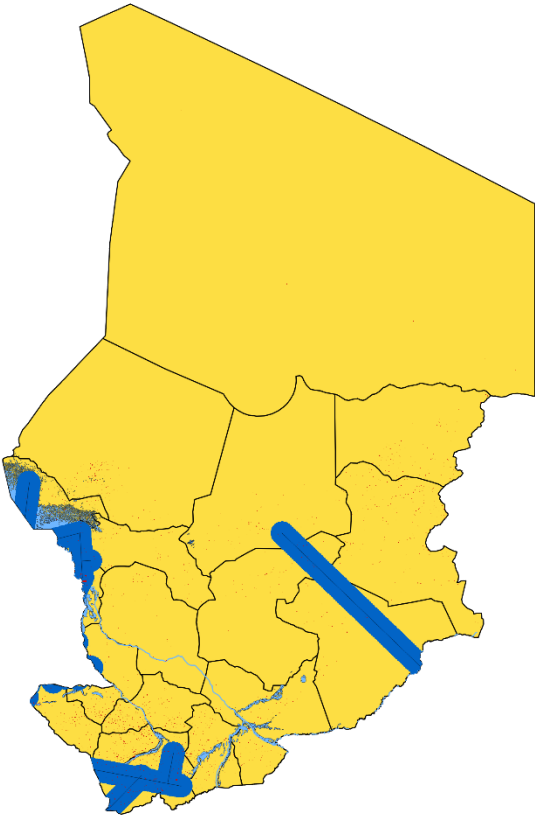

Share of electrification options in all Chadian regions

GridPlanned-GridDom

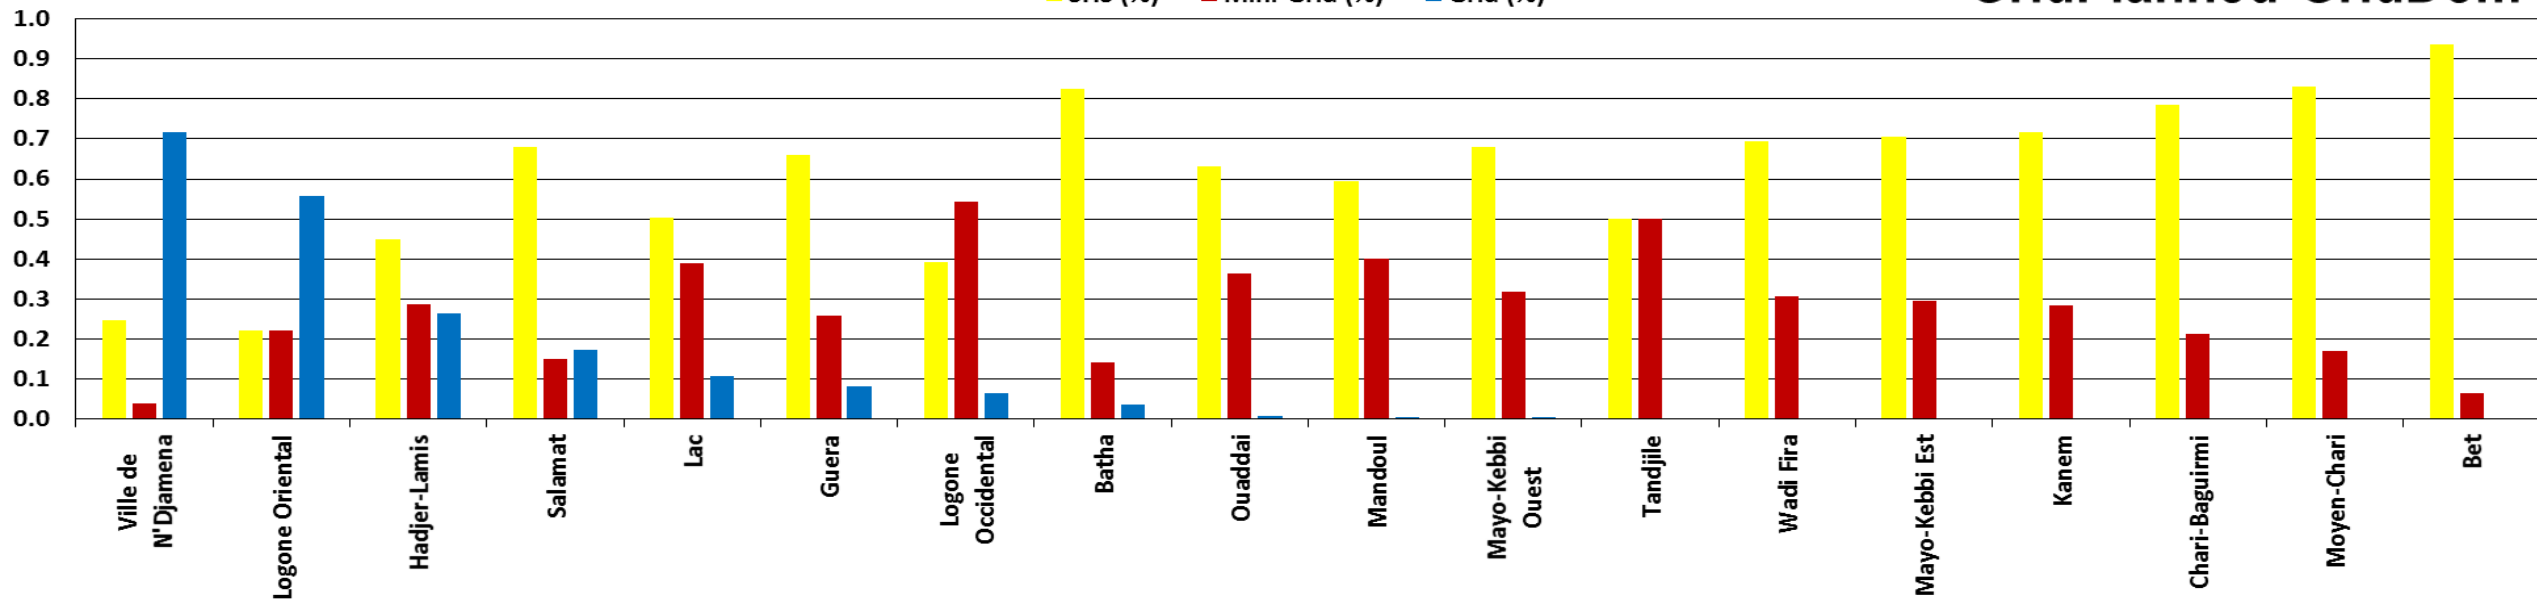

Share of electrification options in all Chadian region

GridPlanned-SHSDom

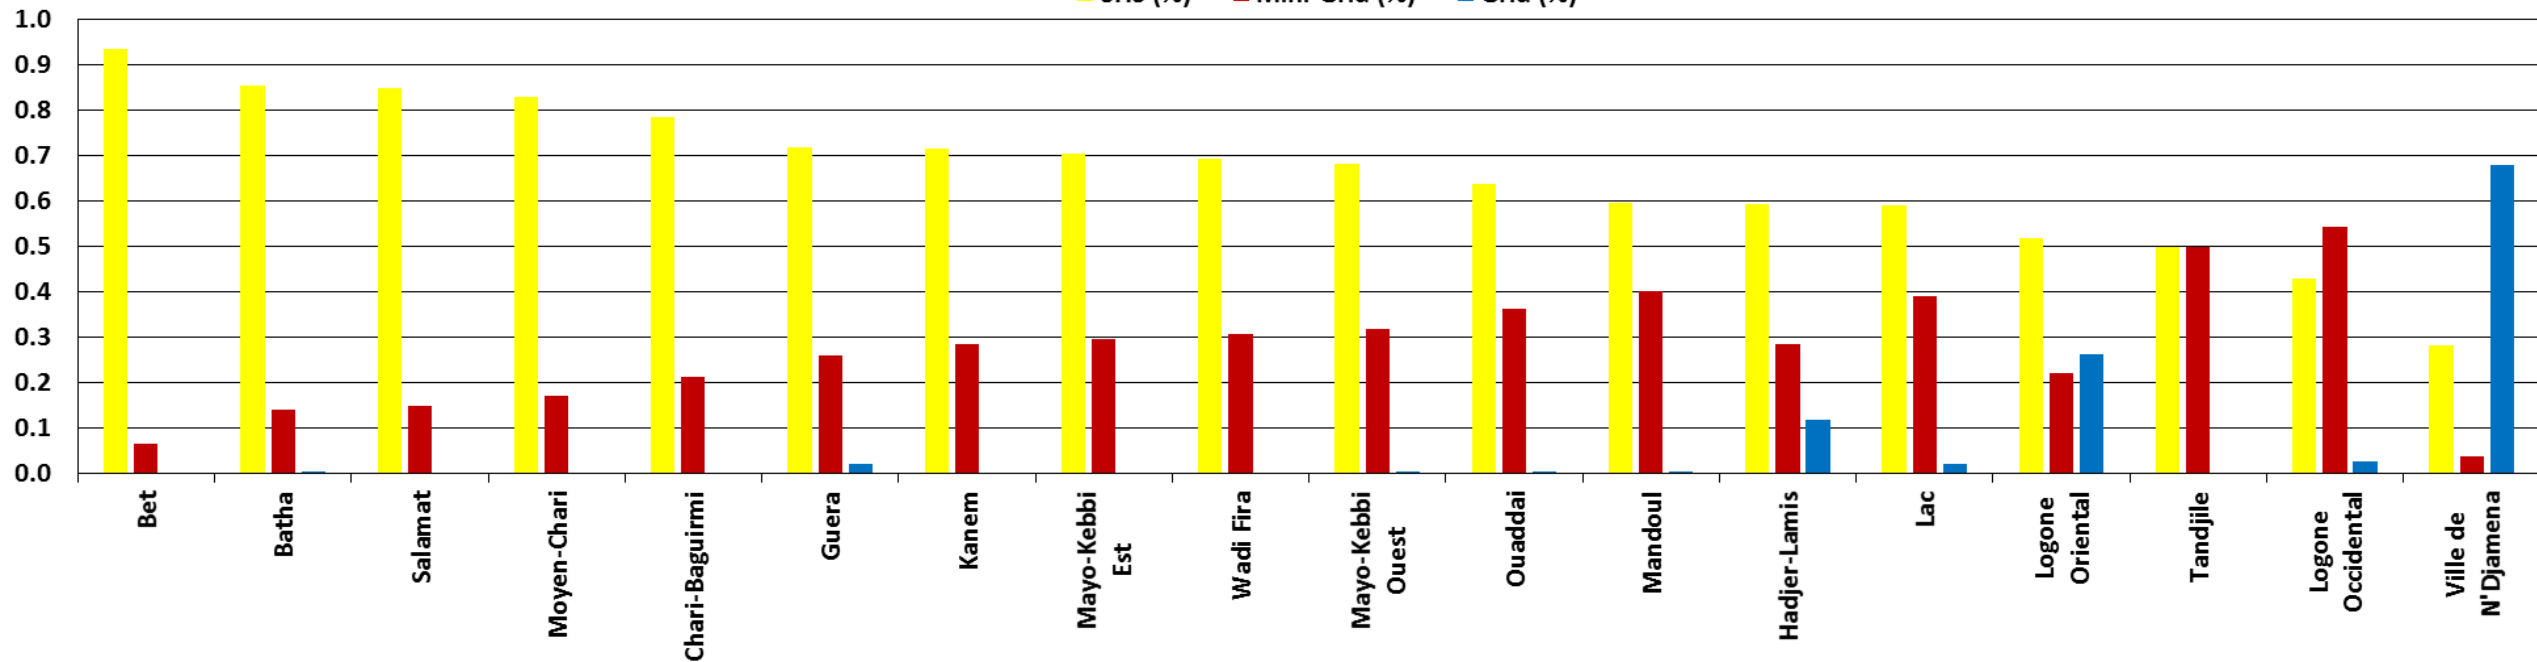

# DR Congo

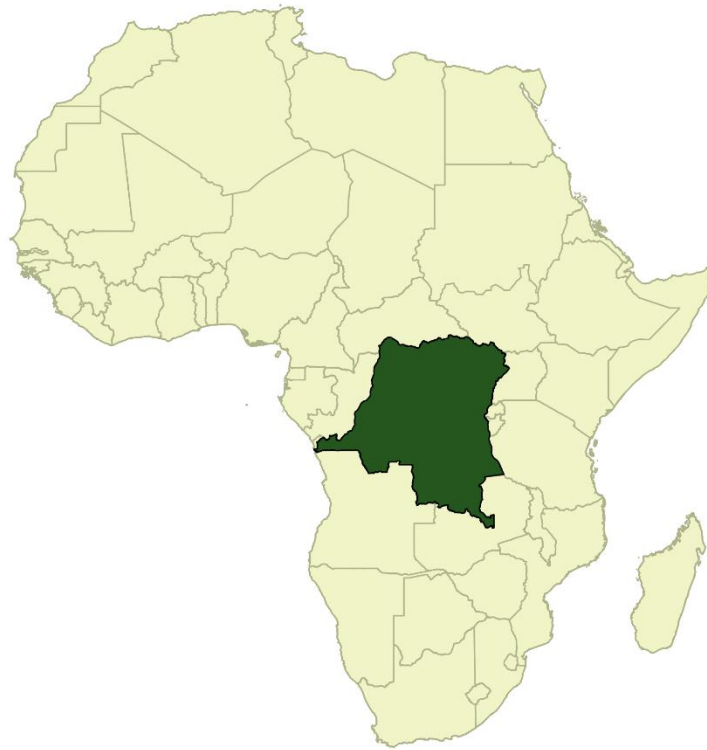

# Night light emission and Population of Congolese (DR) regions

Night light emission in DR Congo

Detected night lights

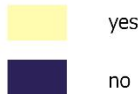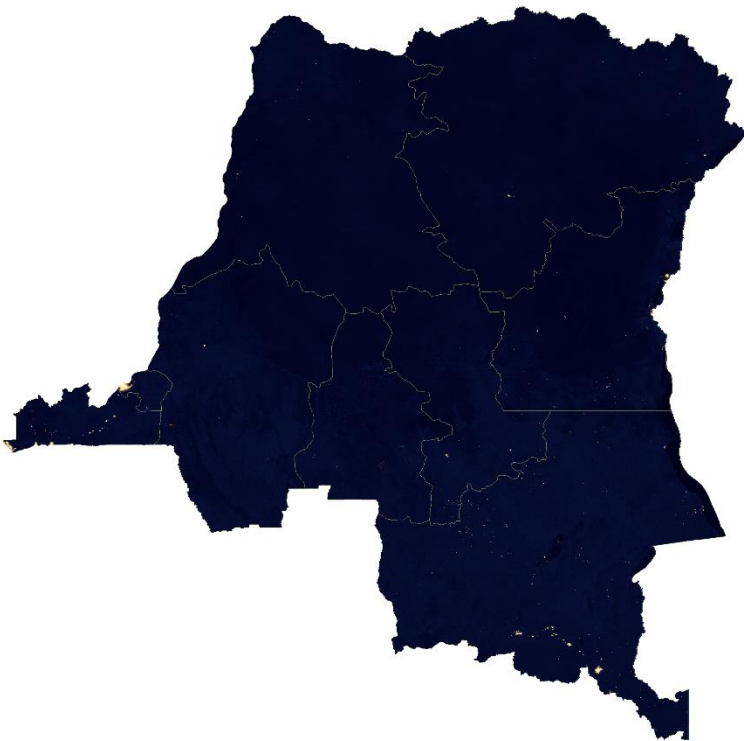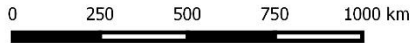

Population structure of DR Congo

Population density (people/750x750m<sup>2</sup>)

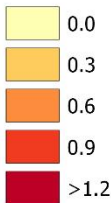

River and Lake

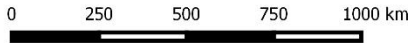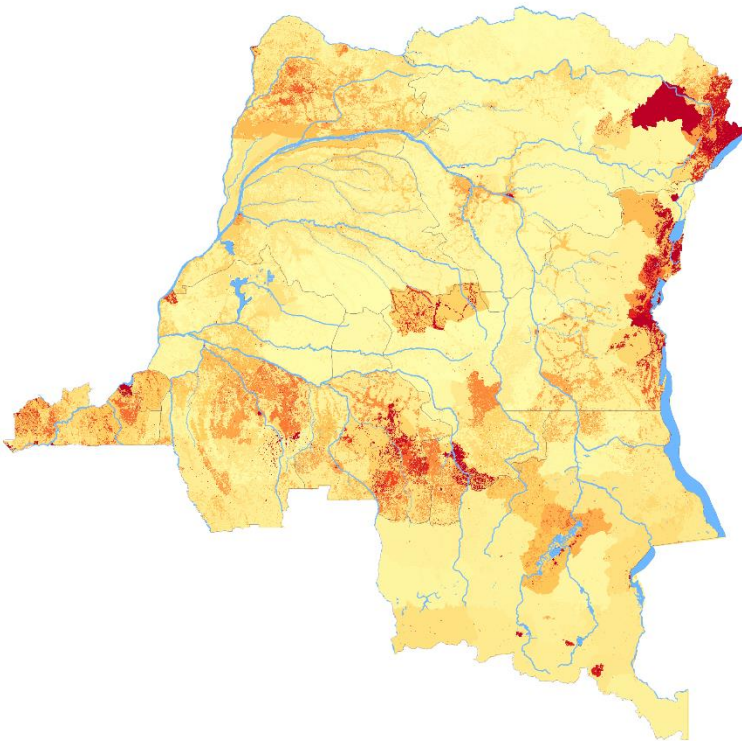

# Electrification option in all Congolese (DR) regions: GridBuilt-GridDom

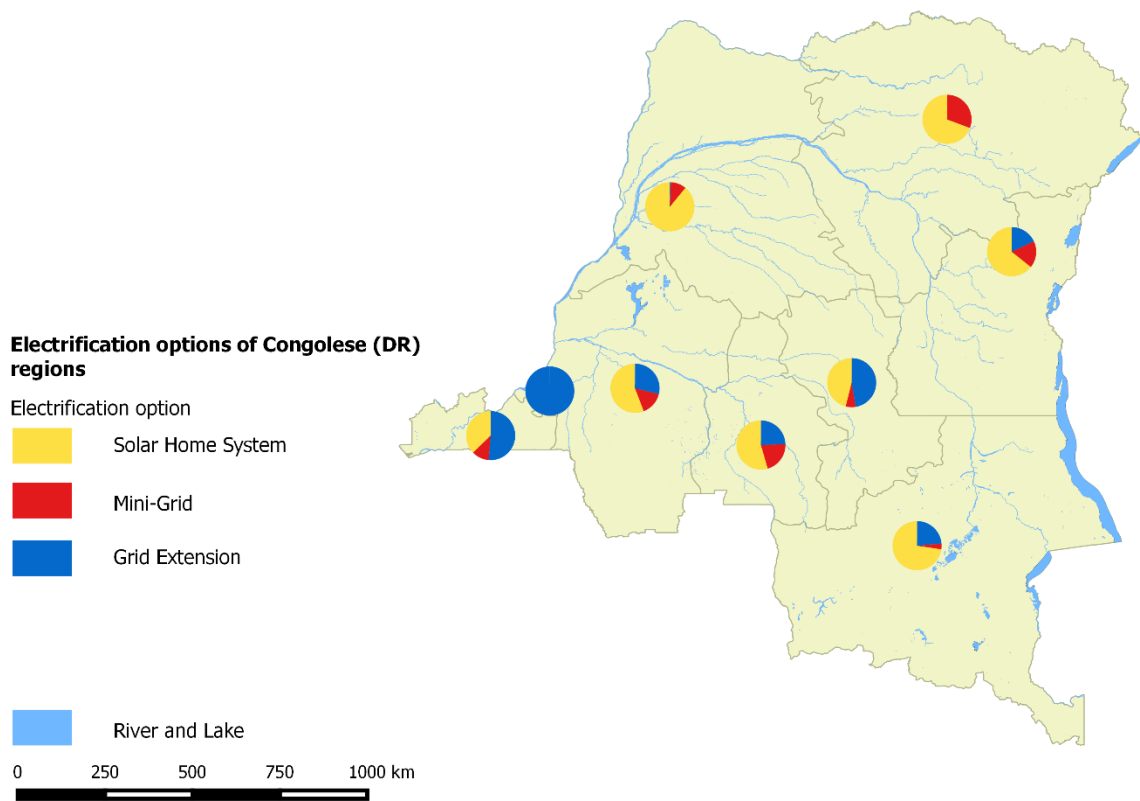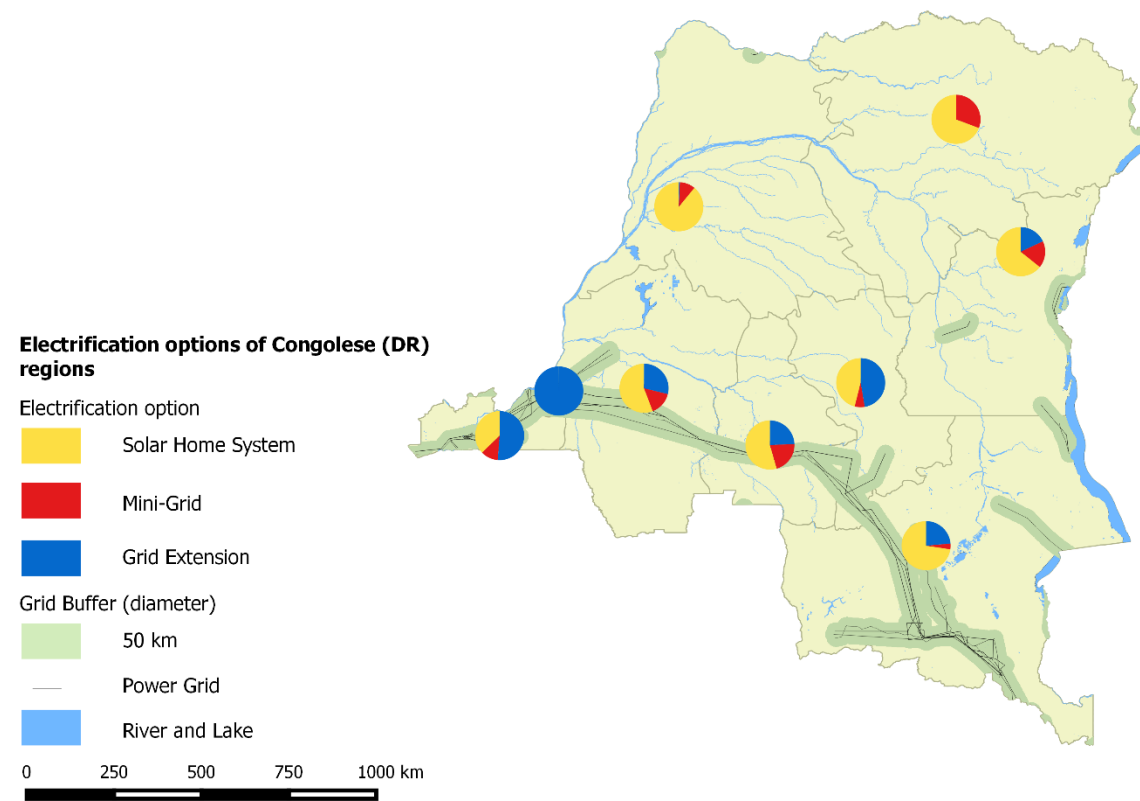

# Electrification option in all Congolese (DR) regions: GridBuilt-SHSDom

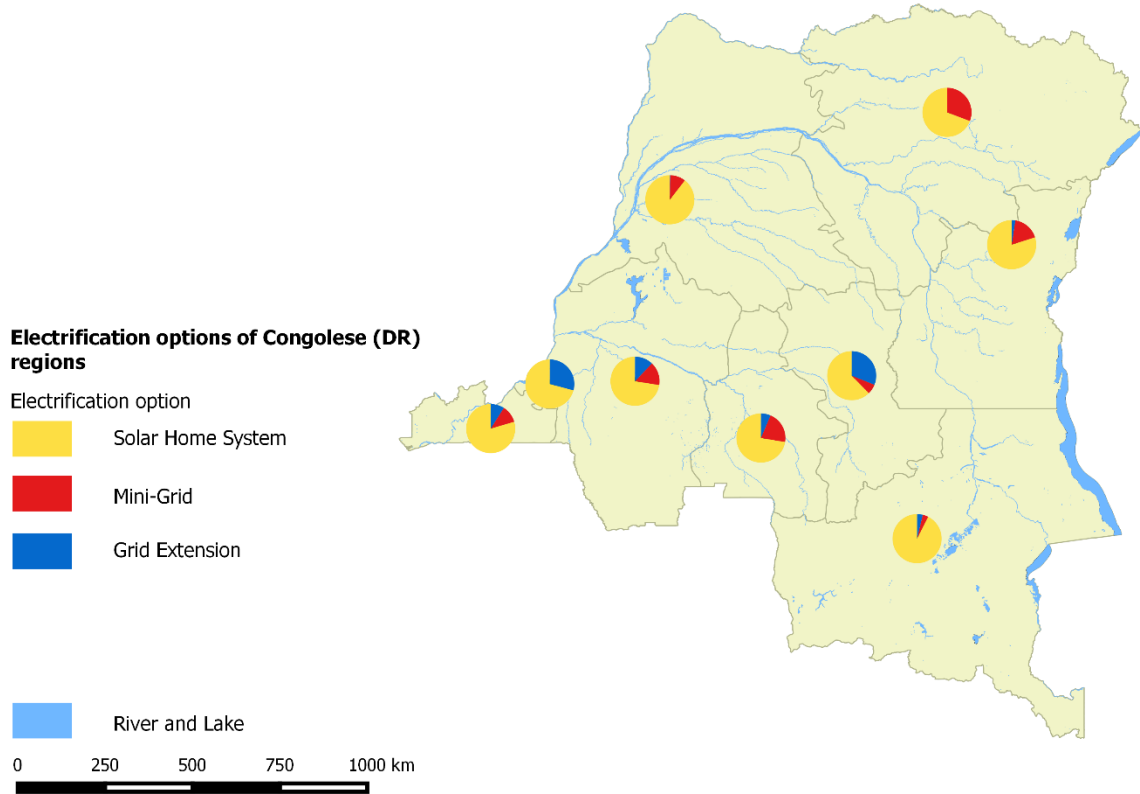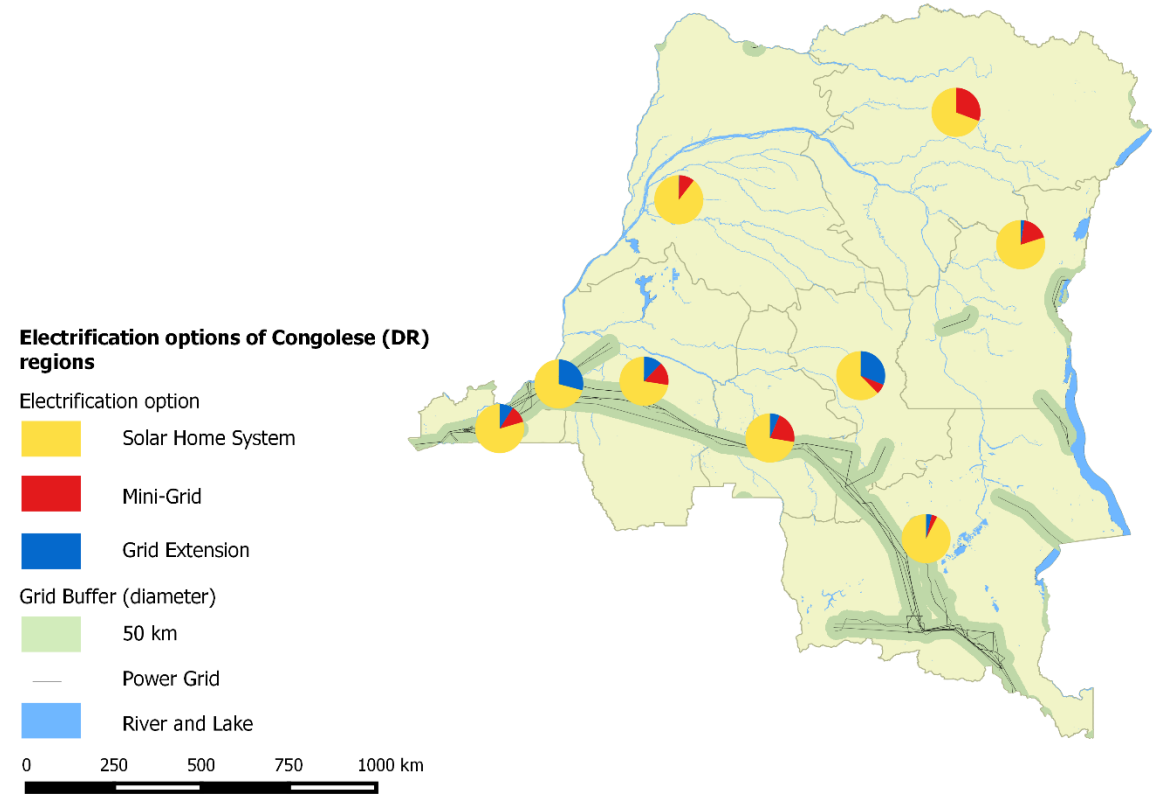

# Electrification option: GridBuilt-SHSDom

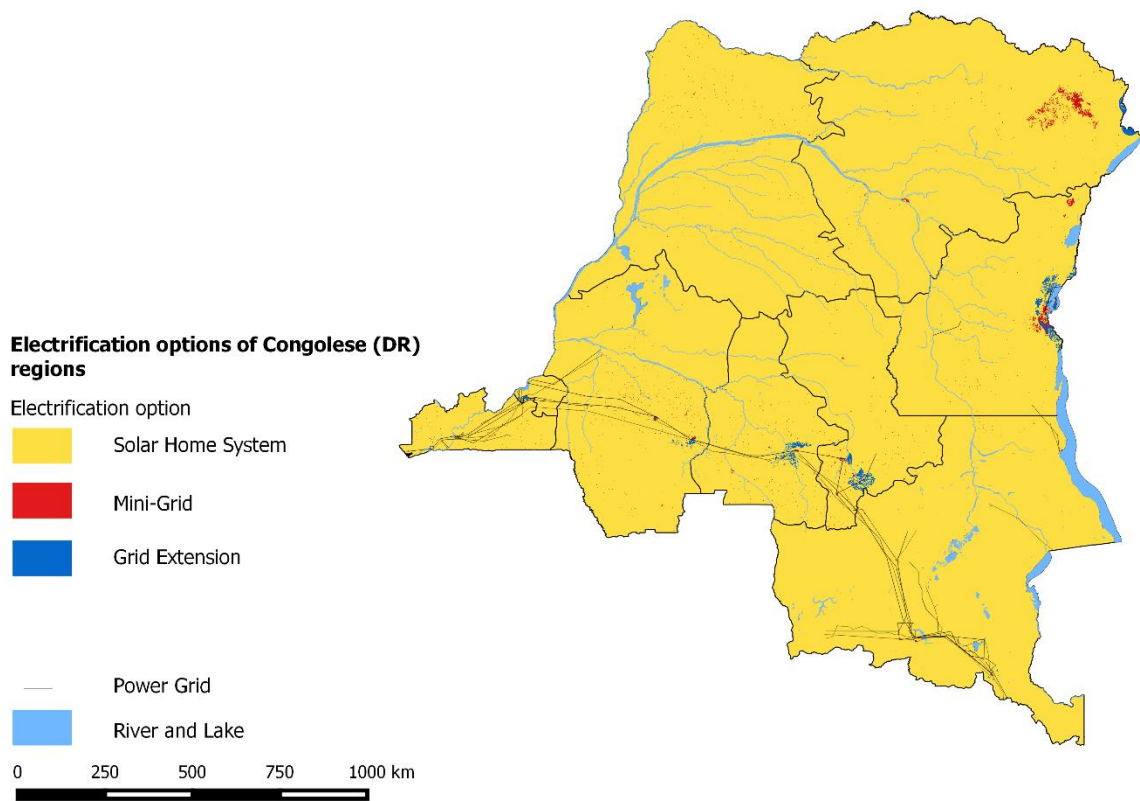

# Electrification option: GridBuilt-GridDom

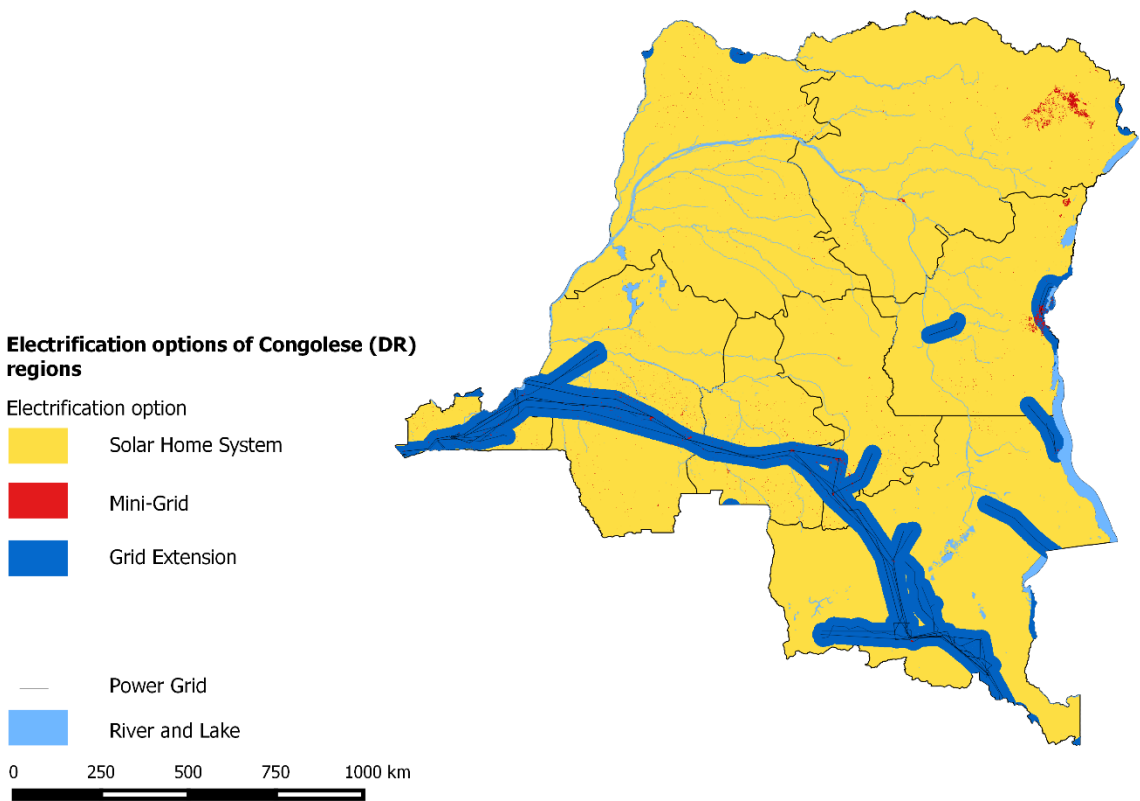

Share of electrification options in all Congolese (DR) regions

GridBuilt-GridDom

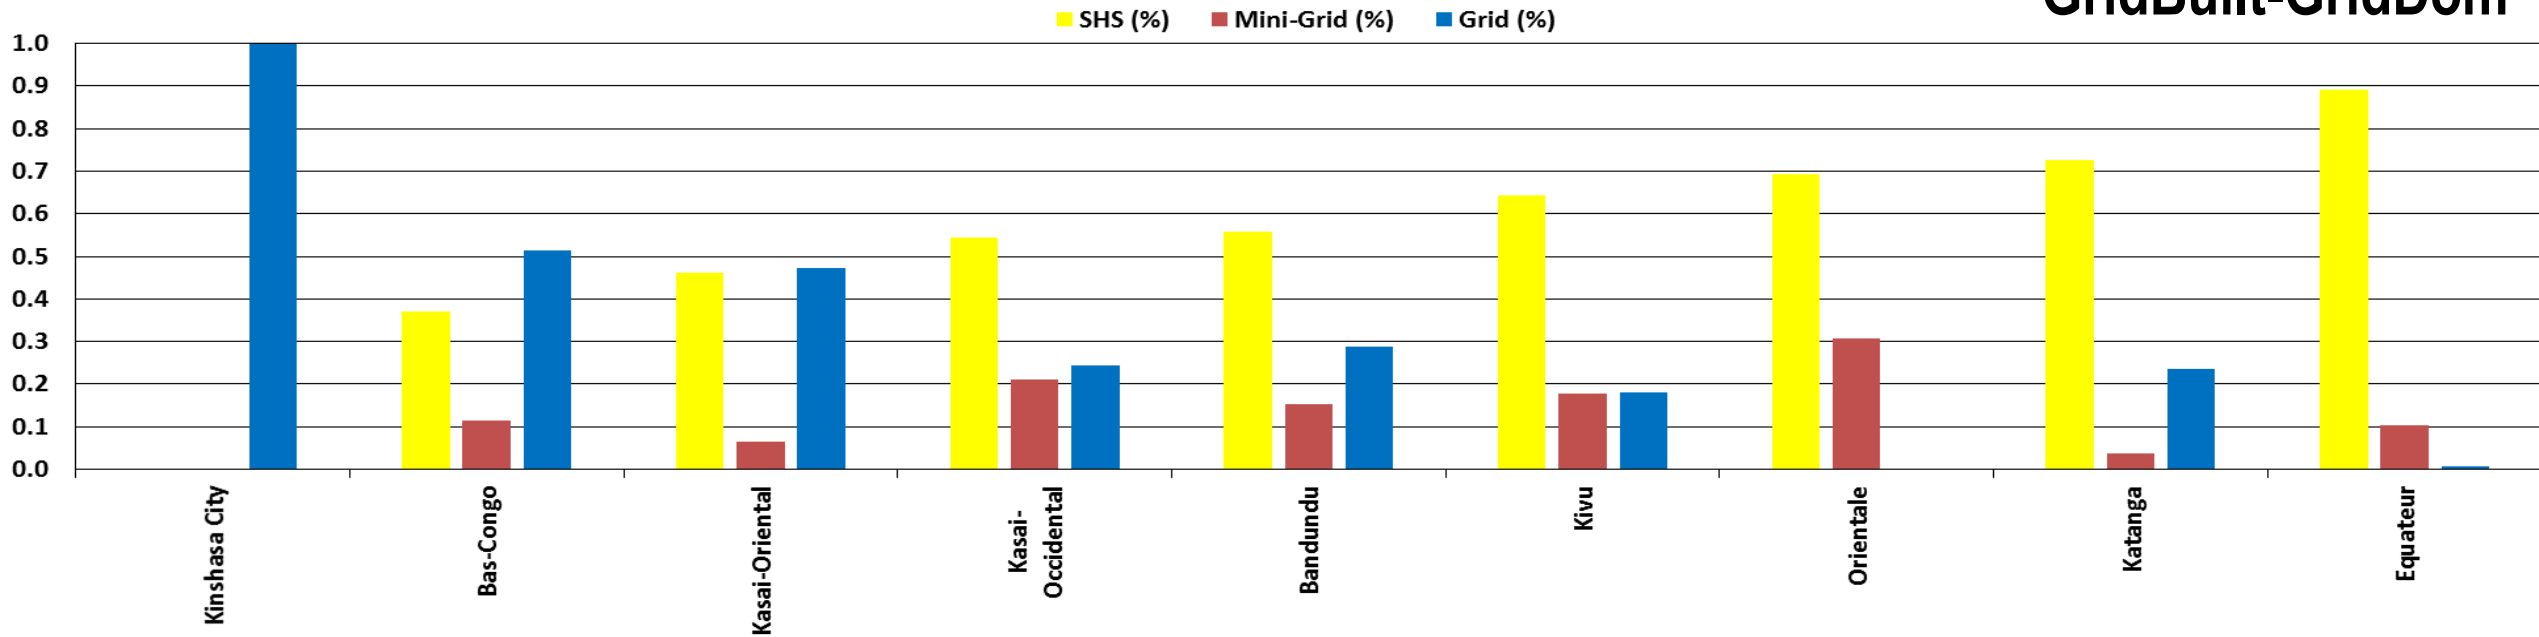

Share of electrification options in all Congolese (DR) regions

GridBuilt-SHSDom

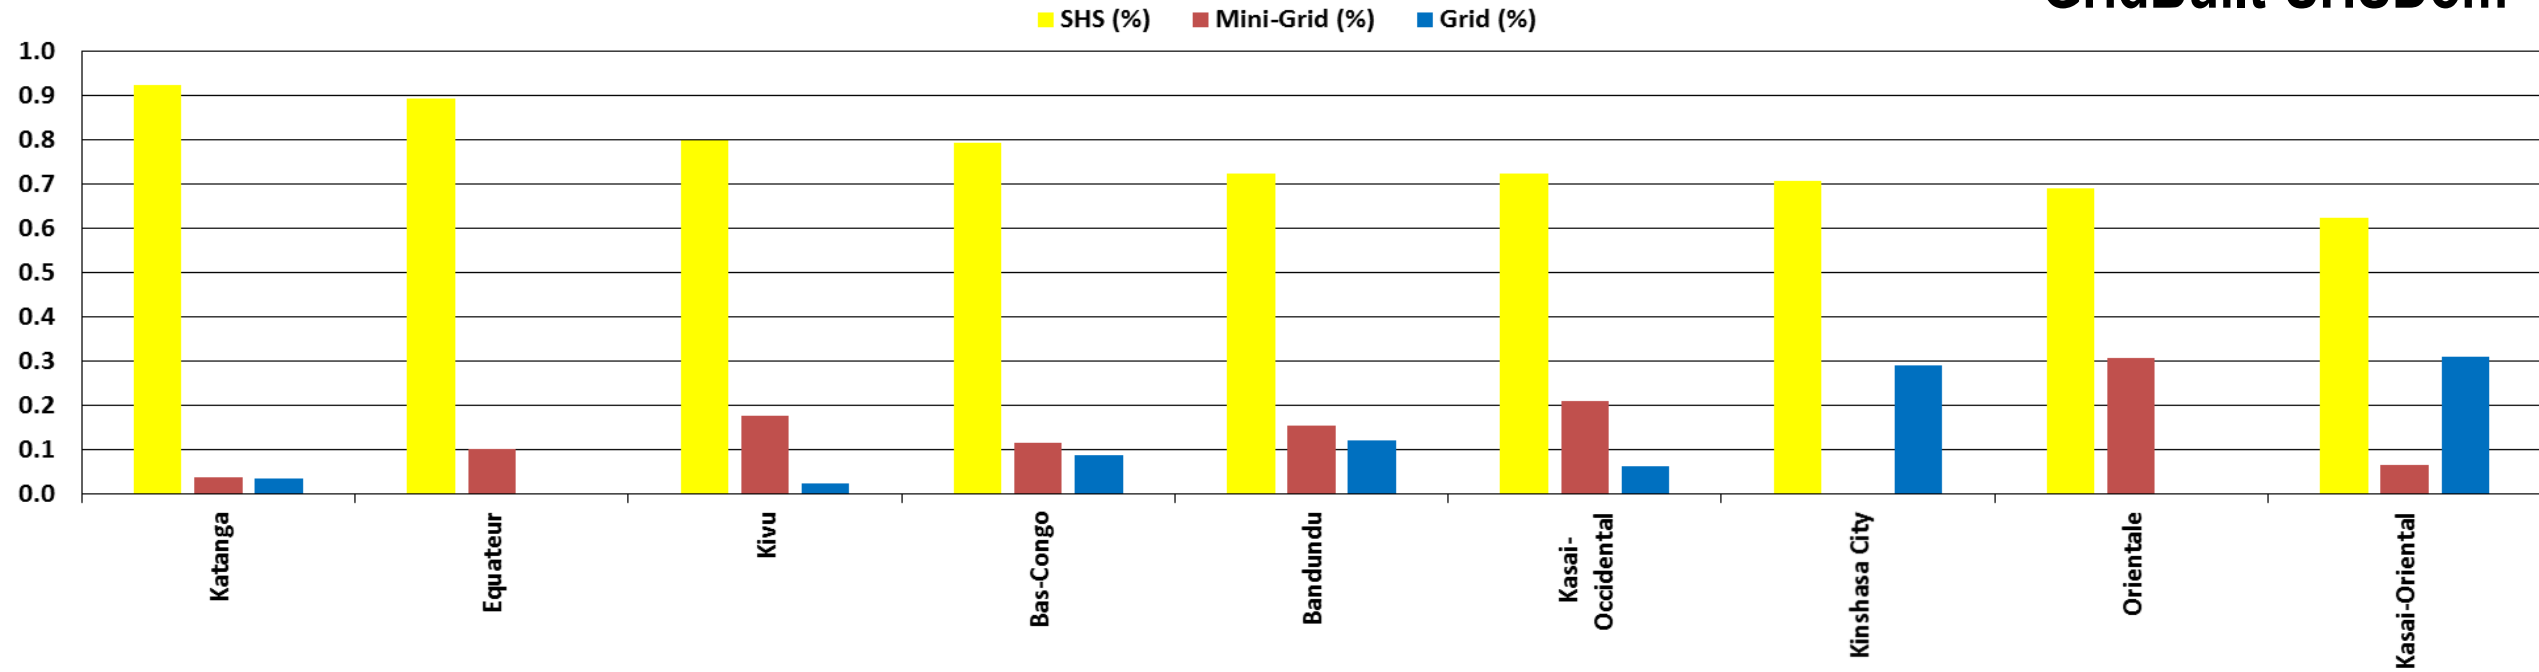

# Electrification option in all Congolese (DR) regions: GridPlanned-GridDom

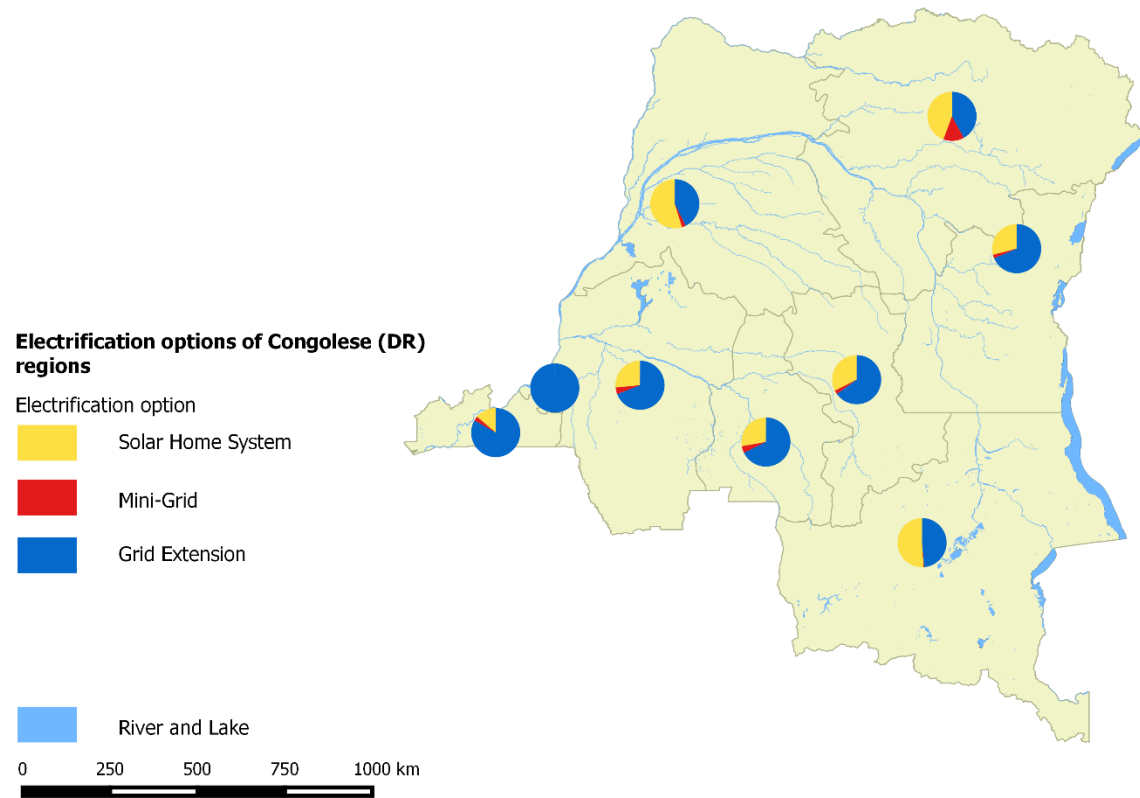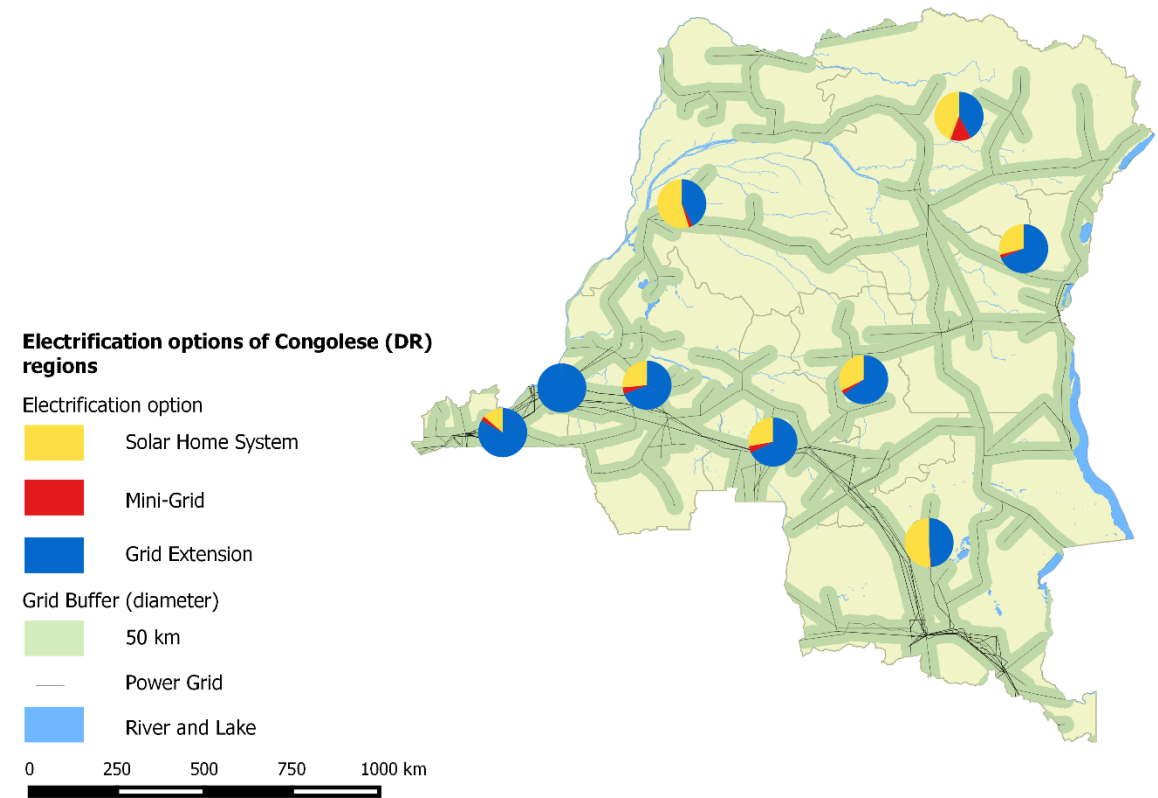

# Electrification option in all Congolese (DR) regions: GridPlanned-SHSDom

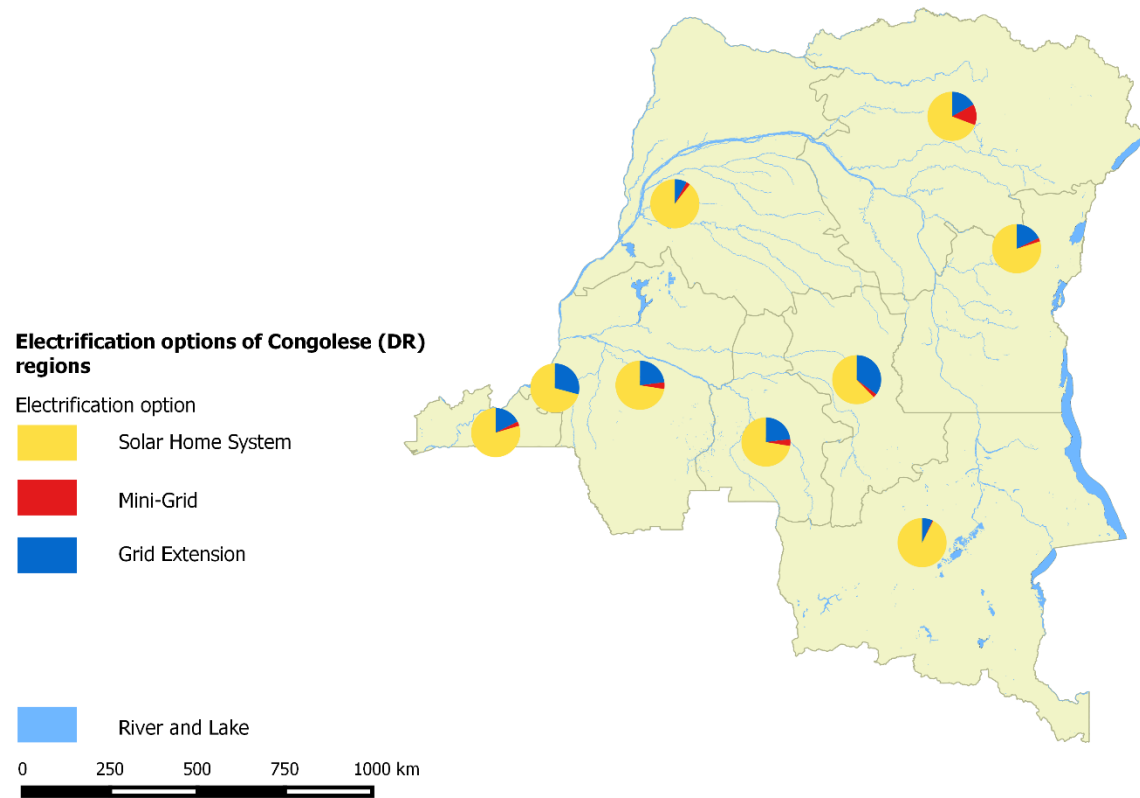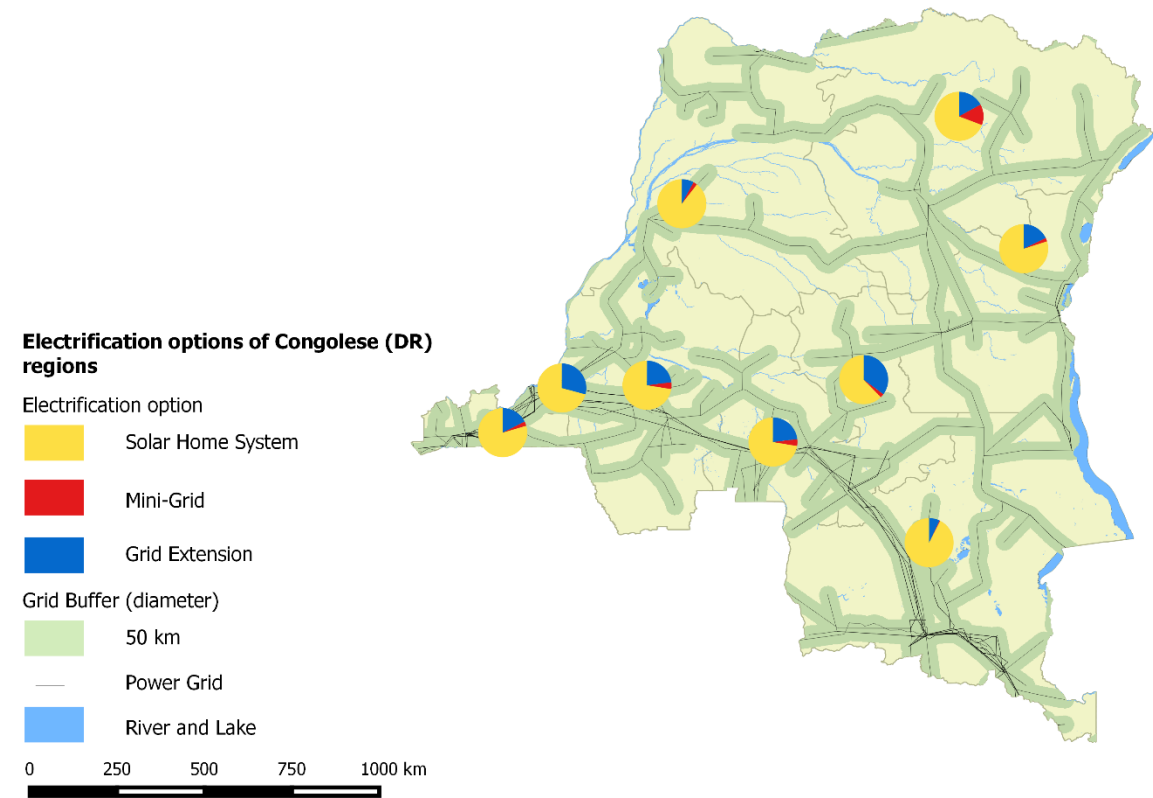

# Electrification option: GridPlanned-SHSDom

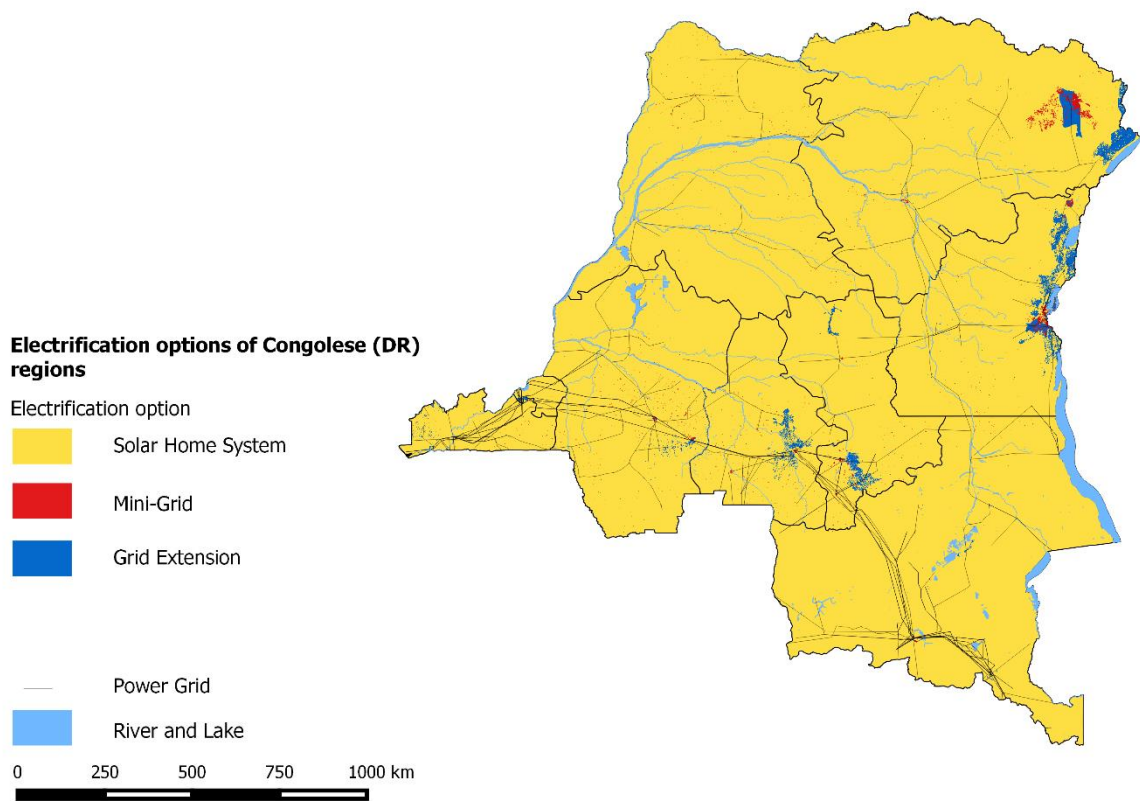

# Electrification option: GridPlanned-GridDom

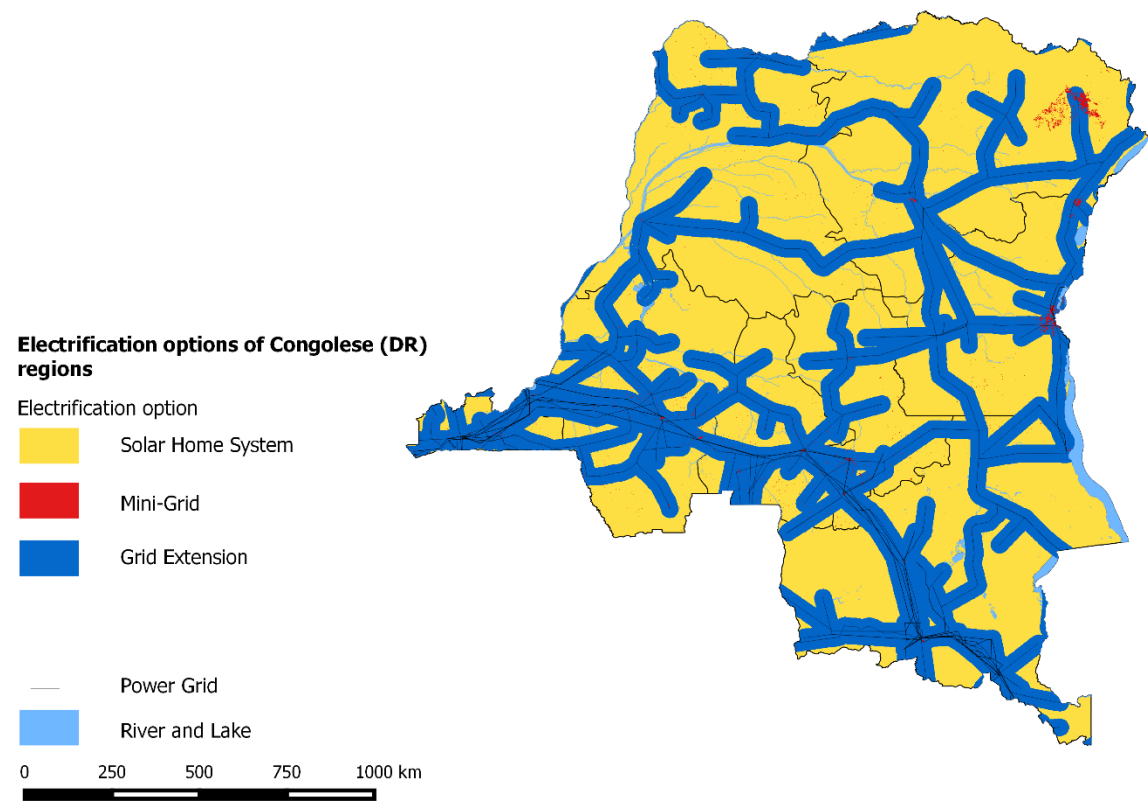

Share of electrification options in all Congolese (DR) regions

GridPlanned-GridDom

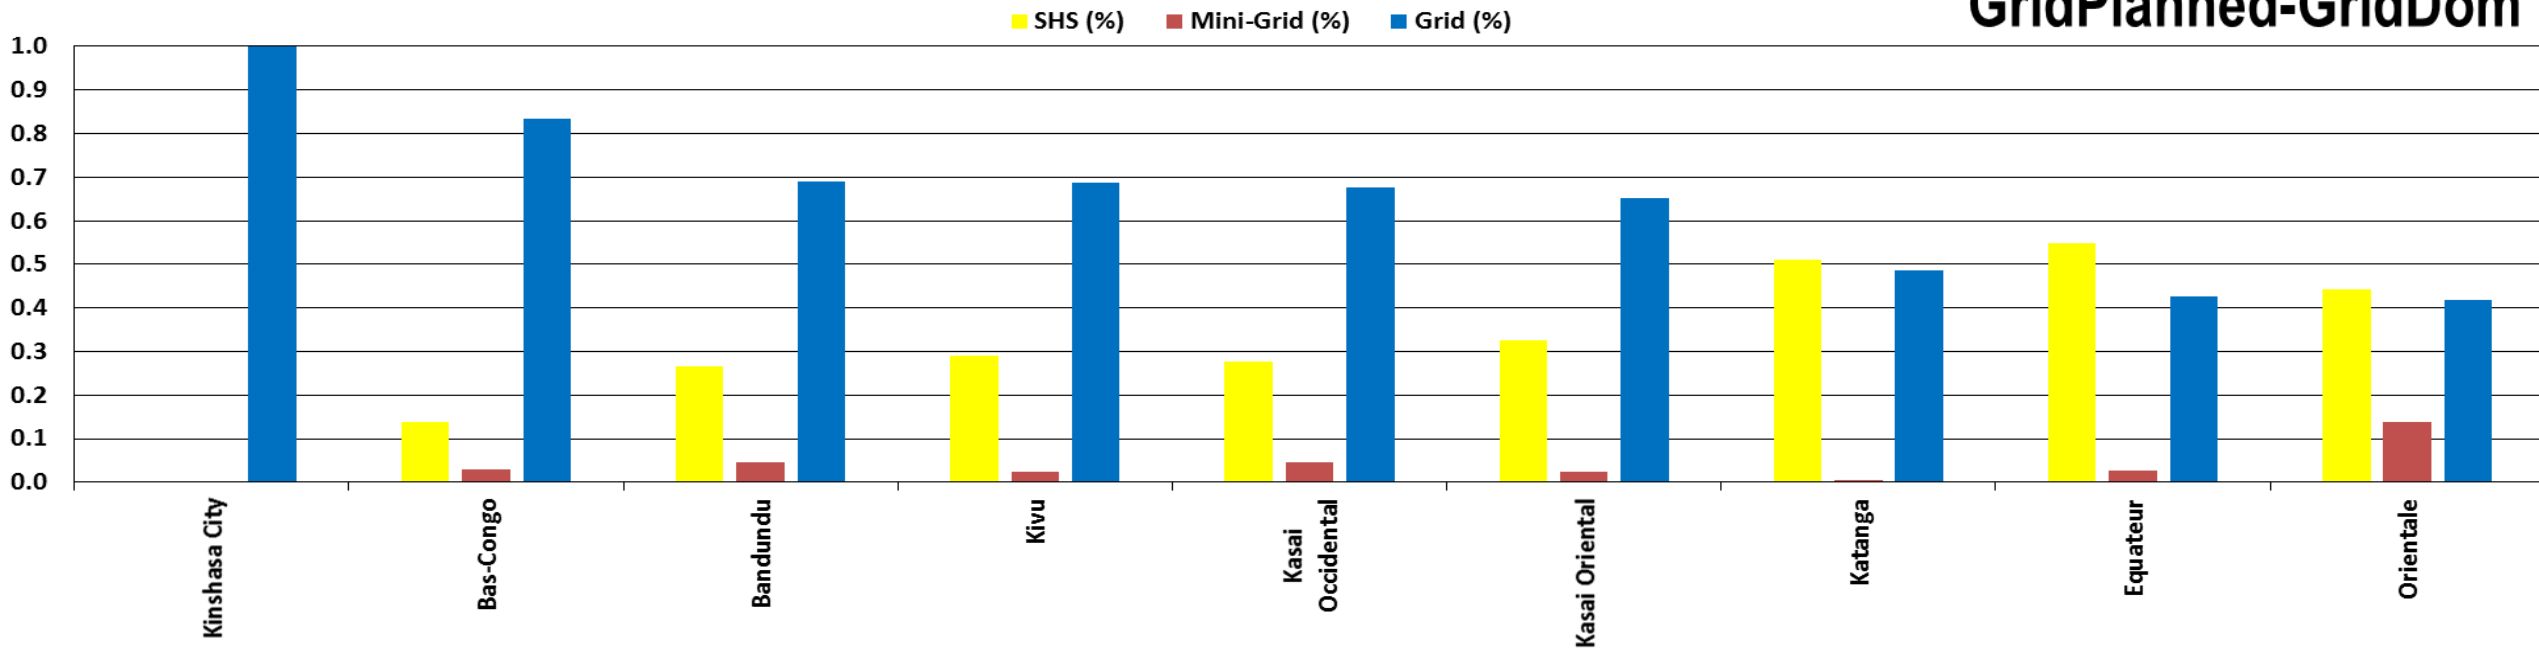

Share of electrification options in all Congolese (DR) regions

GridPlanned-SHSDom

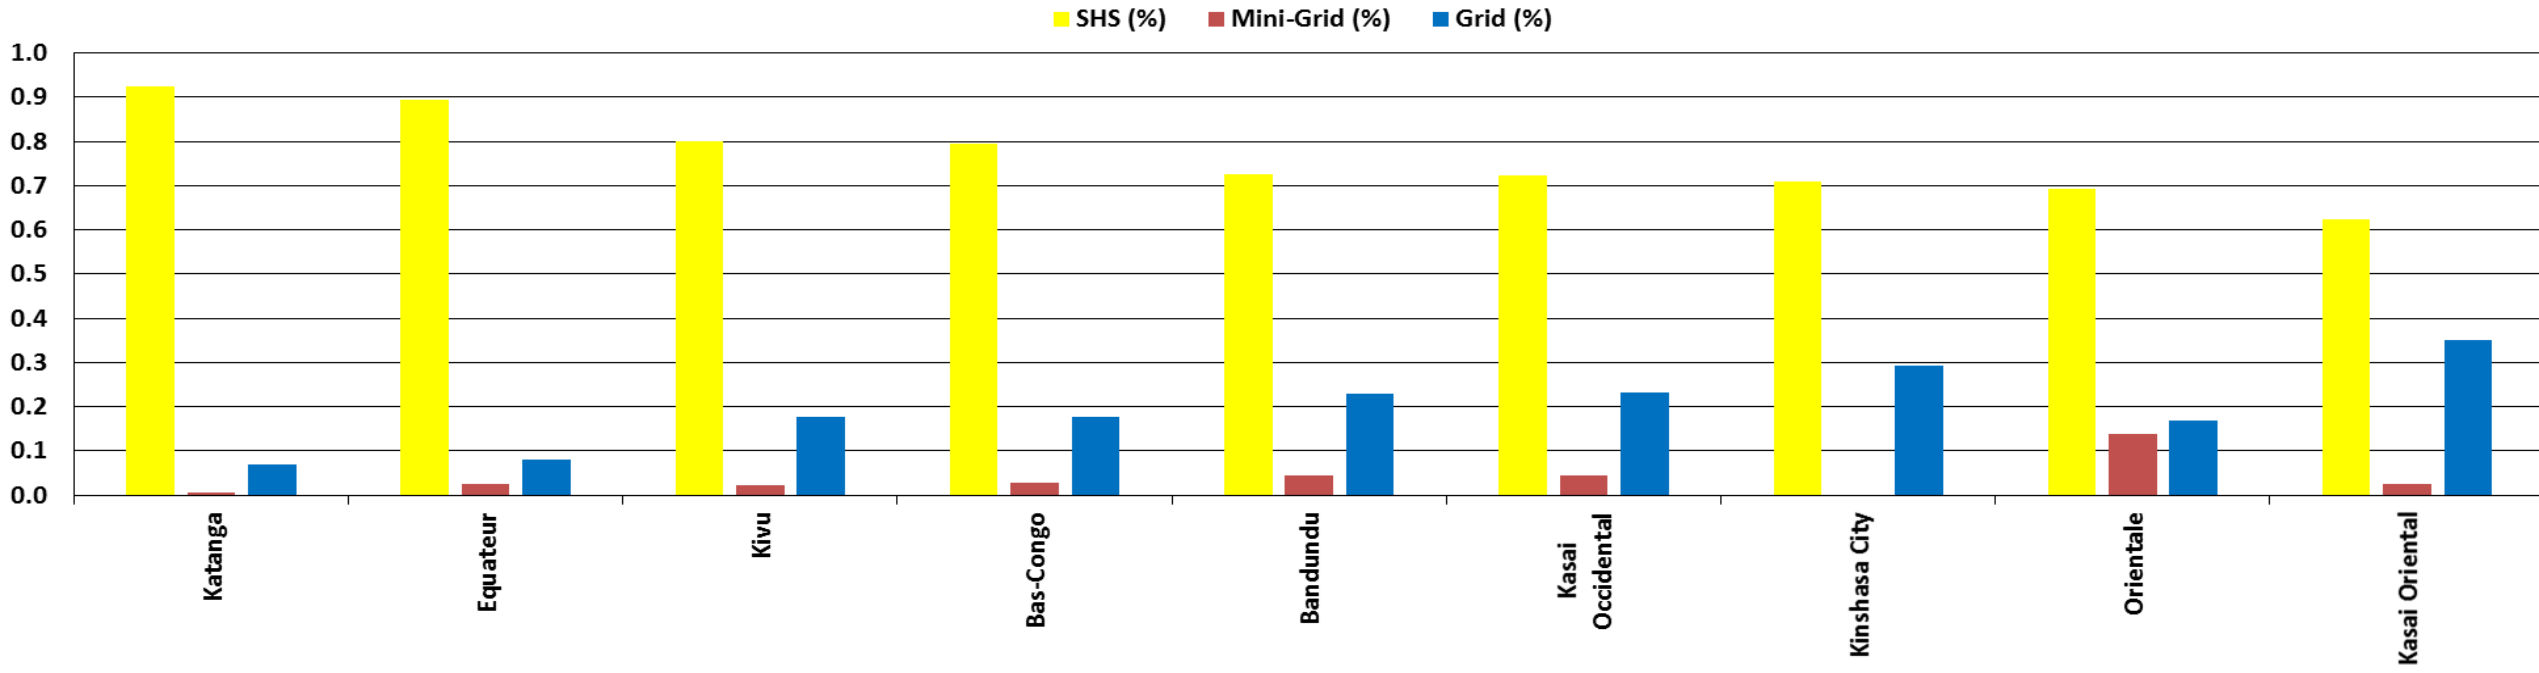

# Equatorial Guinea

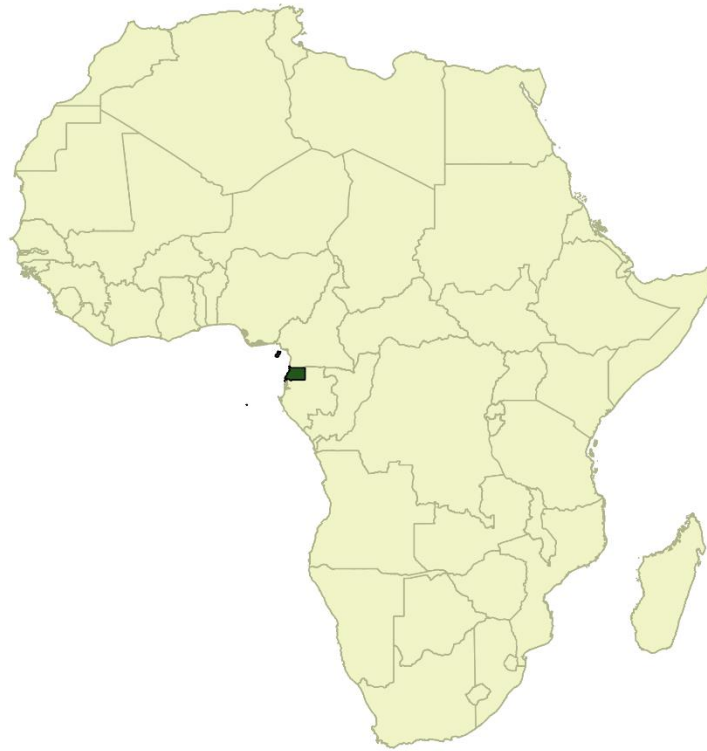

# Night light emission and Population of Equatorial Guinean regions

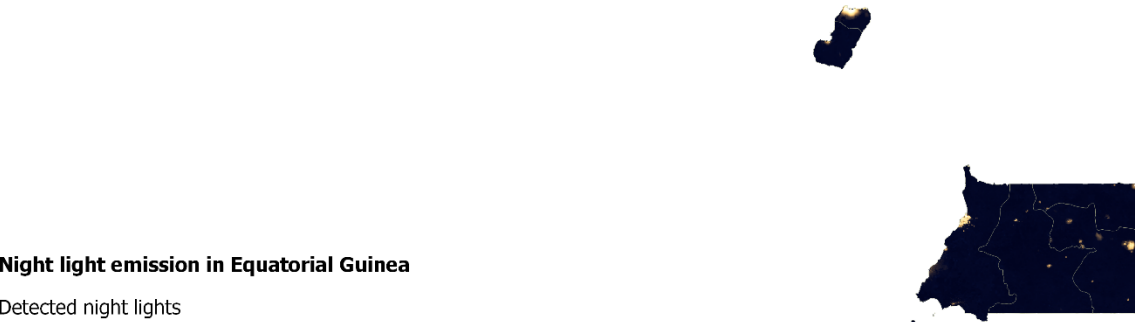

Night light emission in Equatorial Guinea

Detected night lights

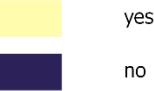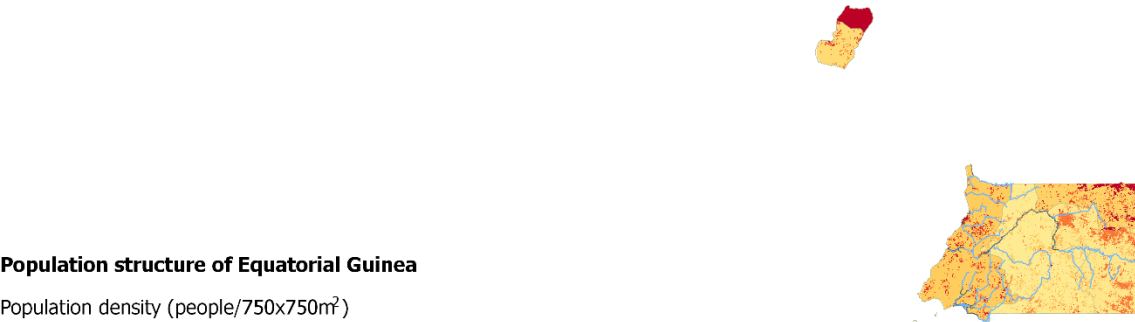

Population structure of Equatorial Guinea

Population density (people/750x750m<sup>2</sup>)

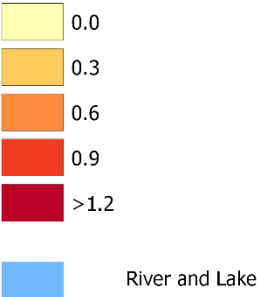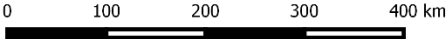

# Electrification option in all Equatorial Guinean regions: GridBuilt-GridDom

Electrification options of Equatorial Guinean regions

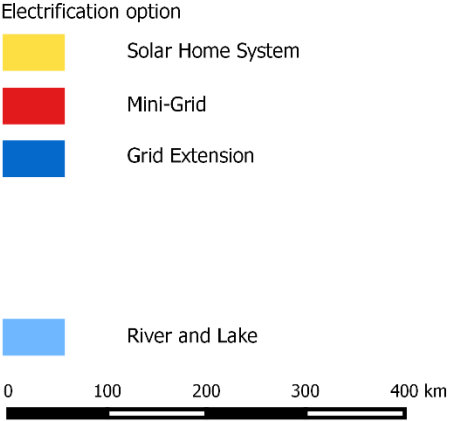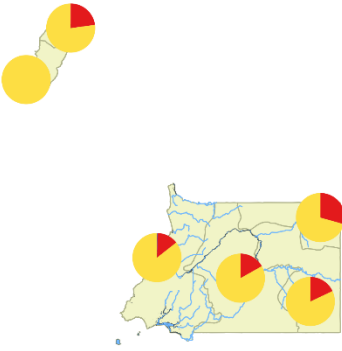

Electrification options of Equatorial Guinean regions

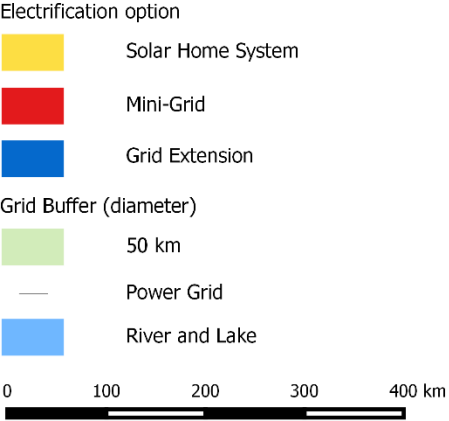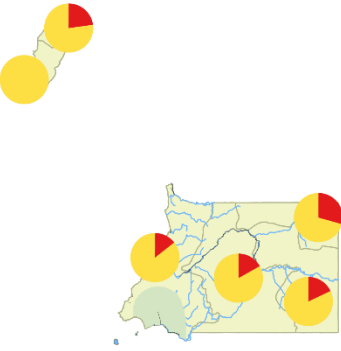

# Electrification option in all Equatorial Guinean regions: GridBuilt-SHSDom

Electrification options of Equatorial Guinean regions

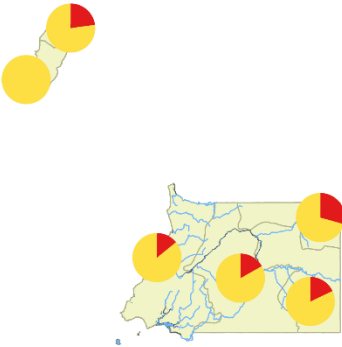

Electrification options of Equatorial Guinean regions

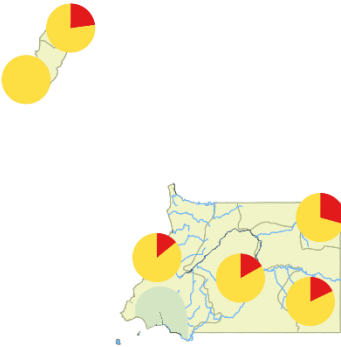

# Electrification option: GridBuilt-SHSDom

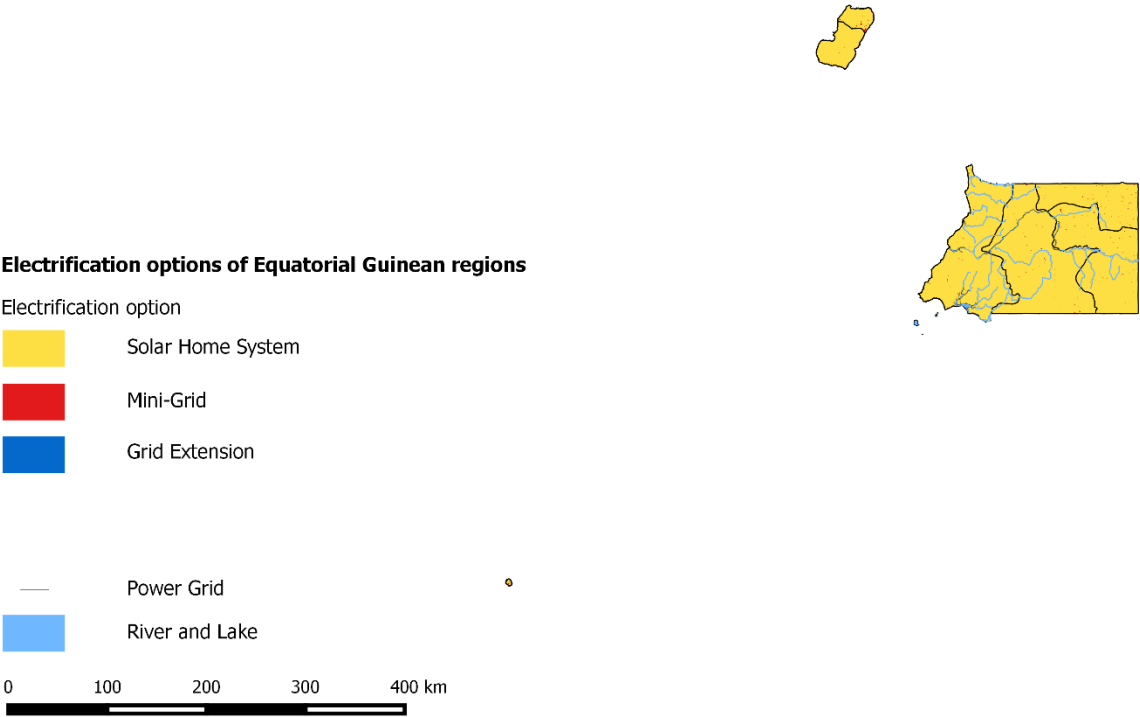

# Electrification option: GridBuilt-GridDom

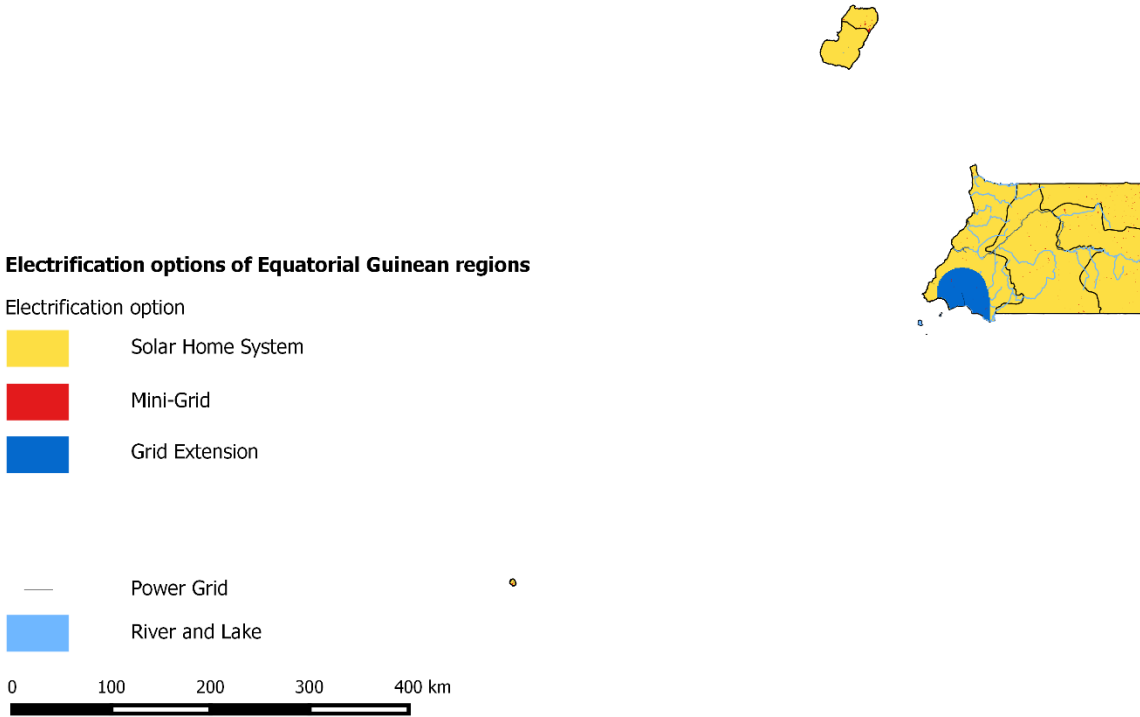

Share of electrification options in all Equatorial Guinean regions

SHS (%) Mini-Grid (%) Grid (%)

GridBuilt-GridDom

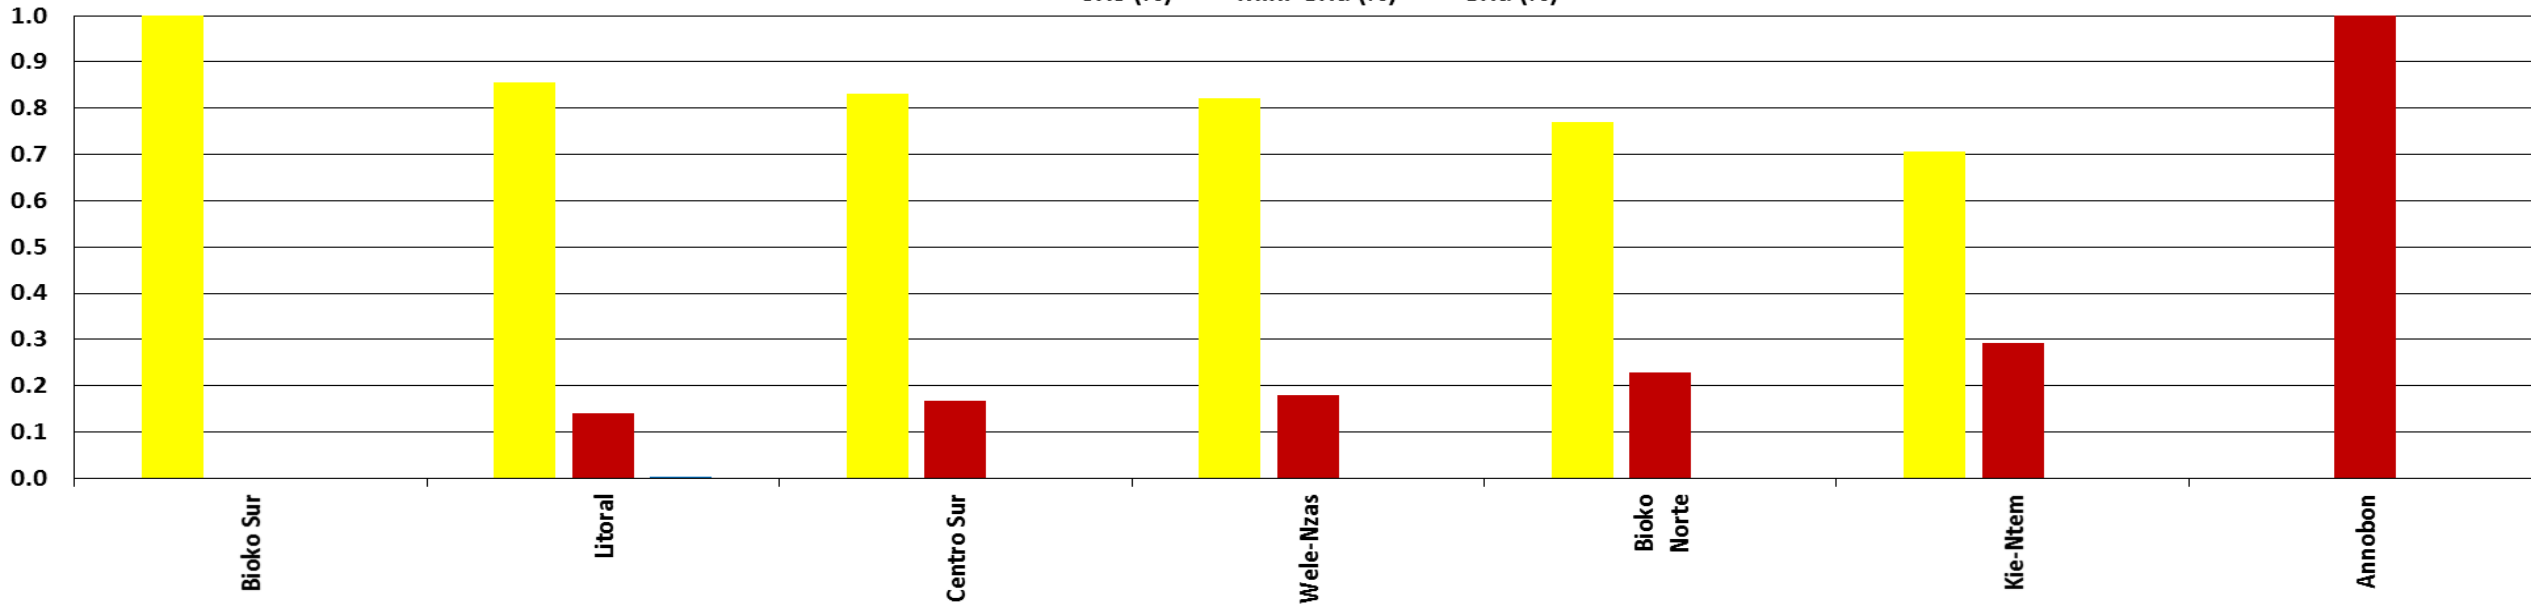

Share of electrification options in all Equatorial Guinean regions

SHS (%) Mini-Grid (%) Grid (%)

GridBuilt-SHSDom

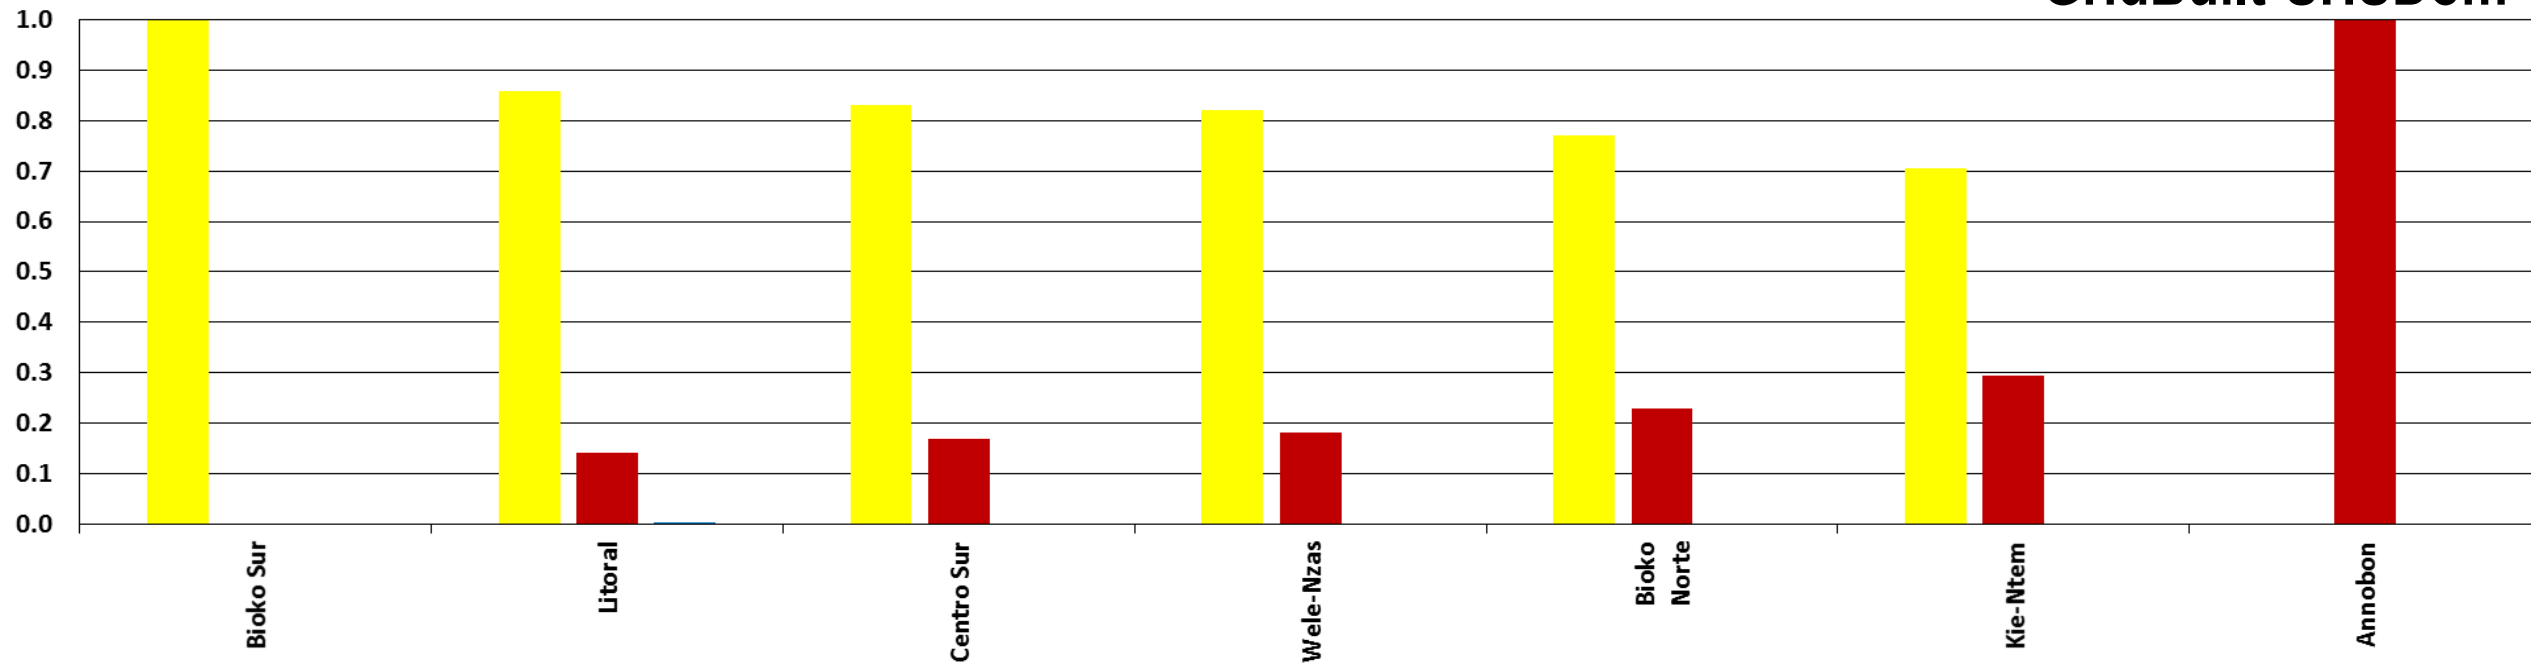

# Electrification option in all Equatorial Guinean regions: GridPlanned-GridDom

Electrification options of Equatorial Guinean regions

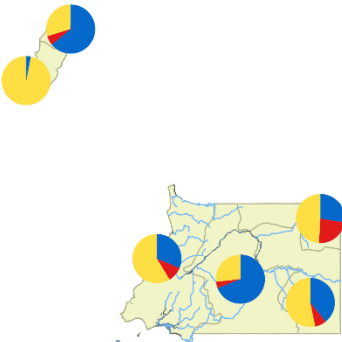

Electrification options of Equatorial Guinean regions

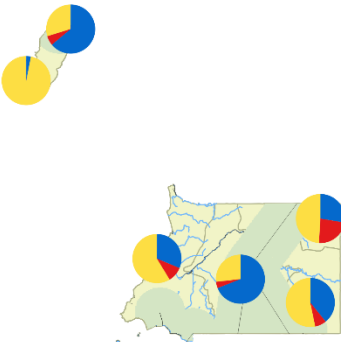

# Electrification option in all Equatorial Guinean regions: GridPlanned-SHSDom

Electrification options of Equatorial Guinean regions

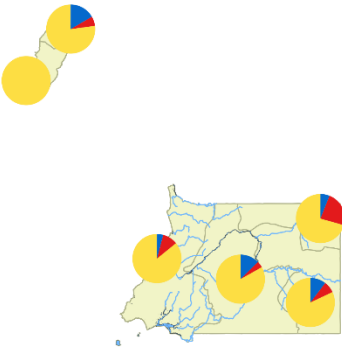

Electrification options of Equatorial Guinean regions

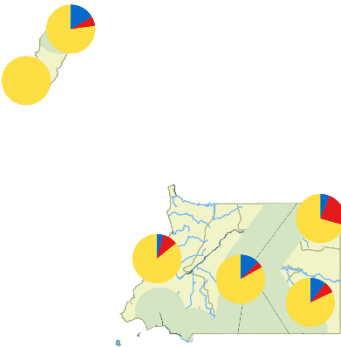

# Electrification option: GridPlanned-SHSDom

# Electrification option: GridPlanned-GridDom

Electrification options of Equatorial Guinean regions

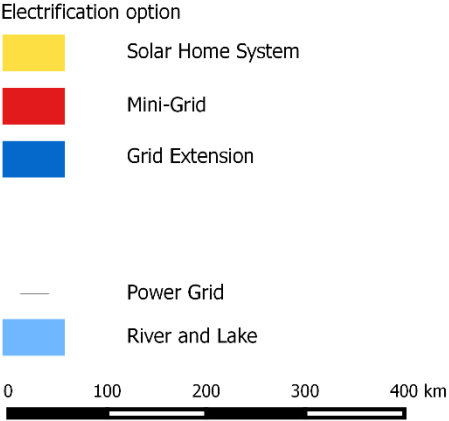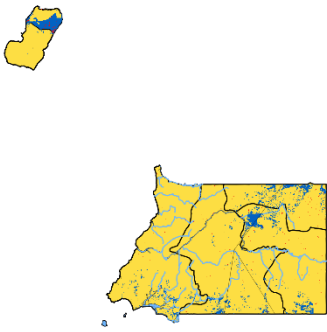

Electrification options of Equatorial Guinean regions

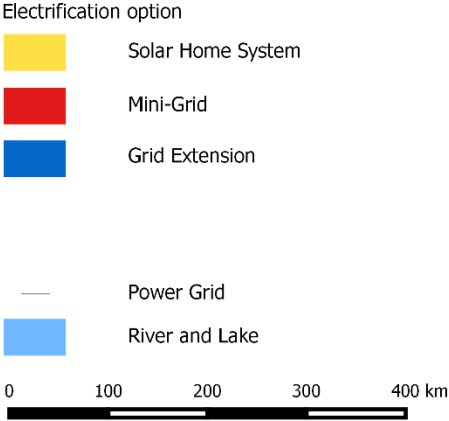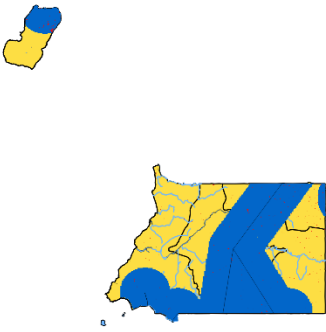

Share of electrification options in all Equatorial Guinean regions

SHS (%) Mini-Grid (%) Grid (%)

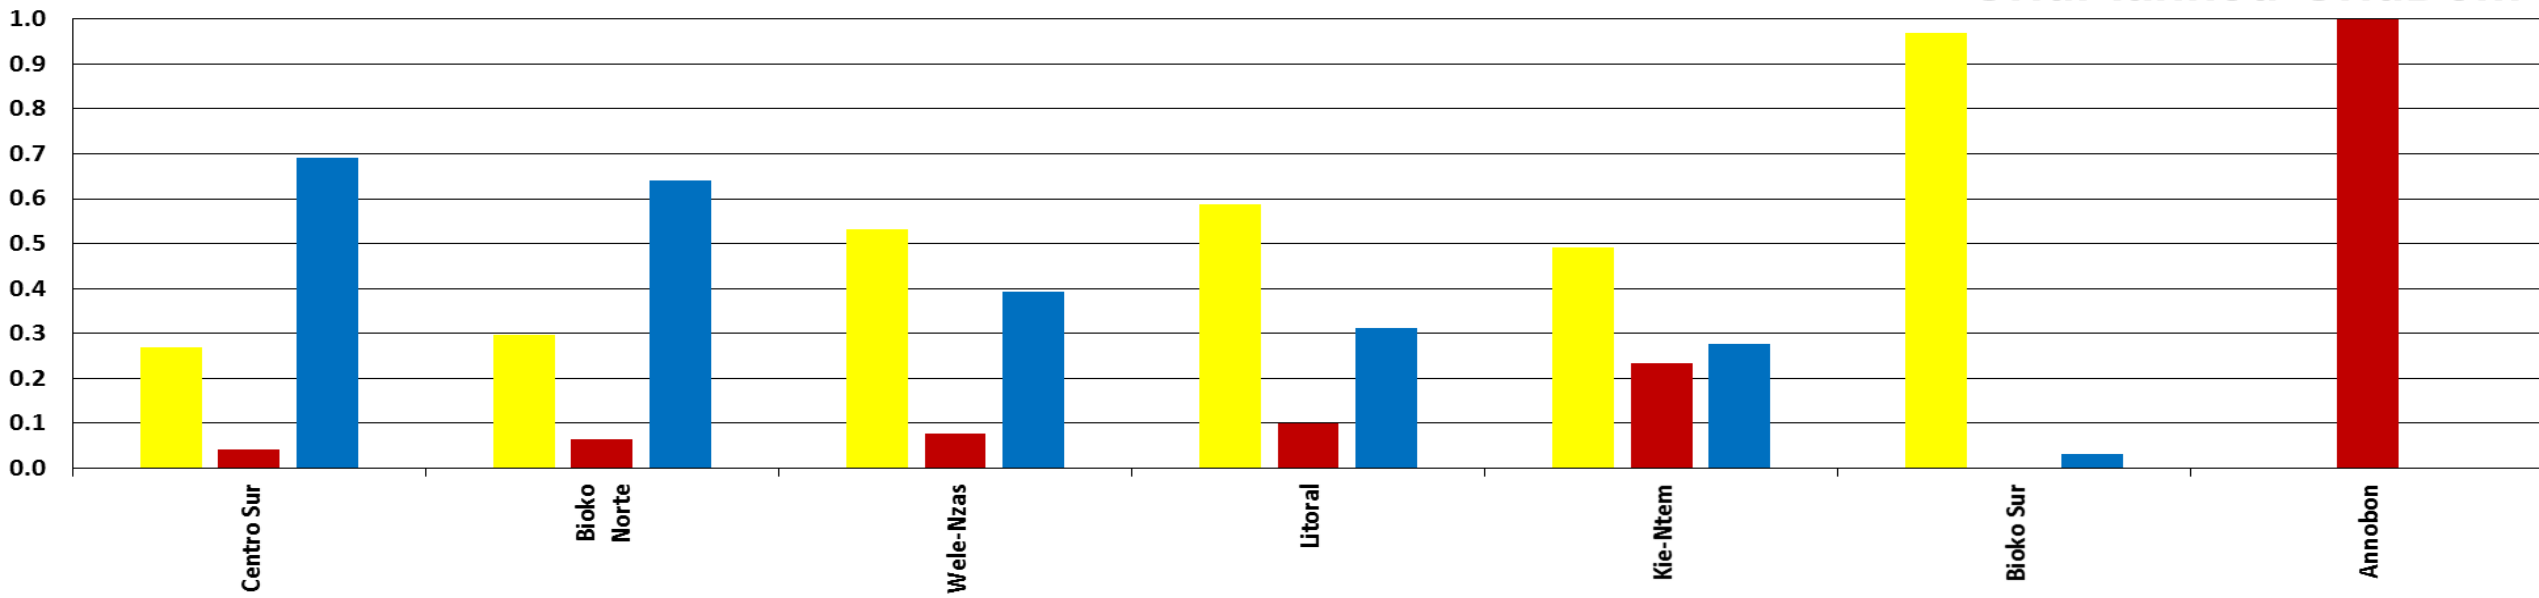

Share of electrification options in all Equatorial Guinean regions

SHS (%) Mini-Grid (%) Grid (%)

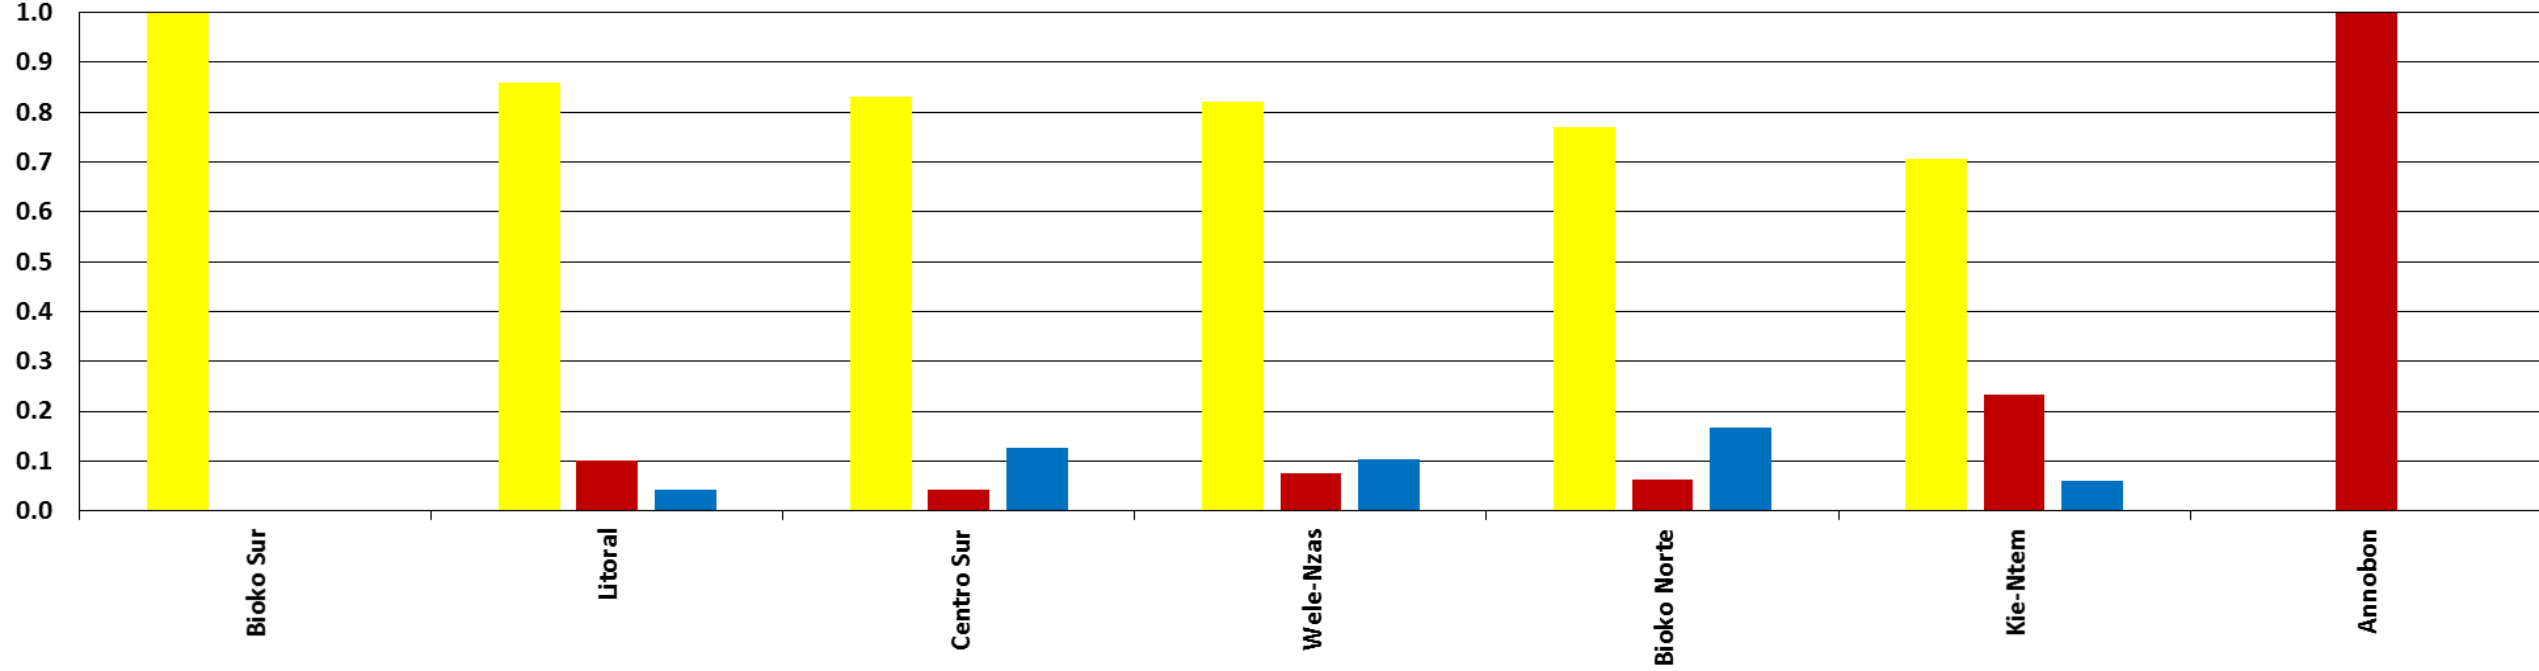

# Gabon

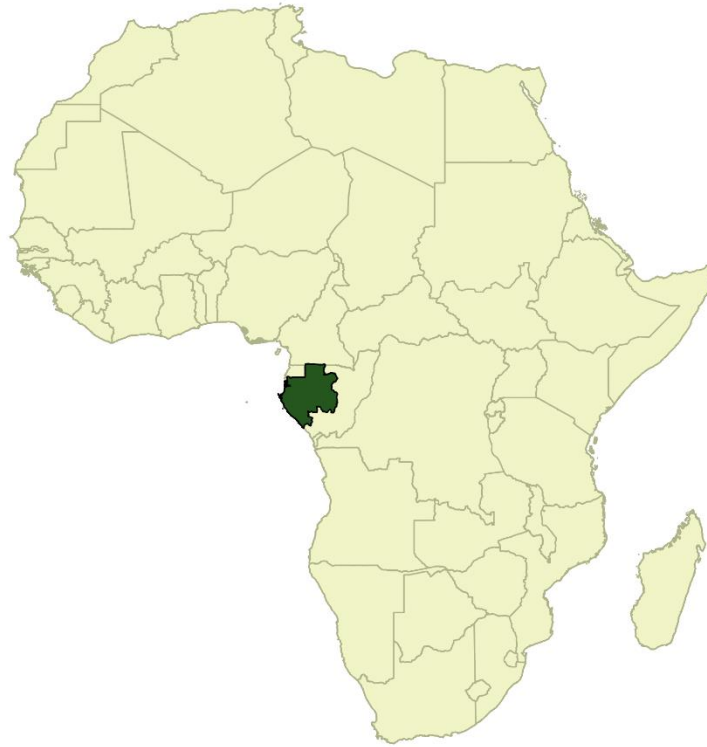

# Night light emission and Population of Gabonese regions

## Night light emission in Gabon

Detected night lights

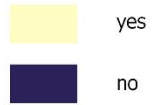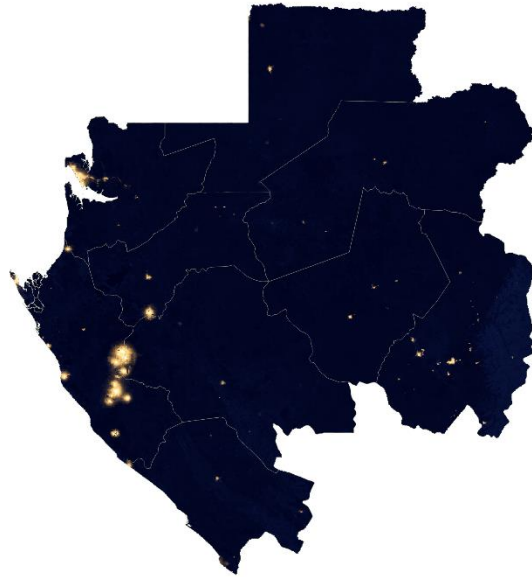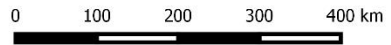

## Population structure of Gabon

Population density (people/750x750m<sup>2</sup>)

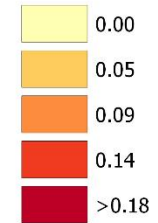

River and Lake (represented by a blue square)

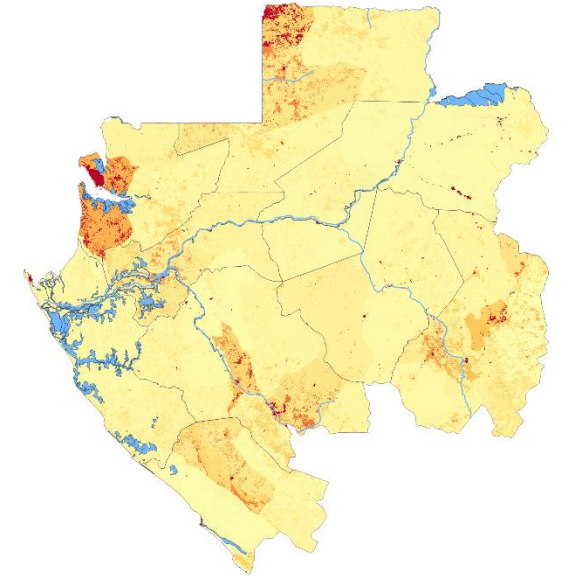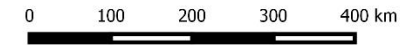

# Electrification option in all Gabonese regions: GridBuilt-GridDom

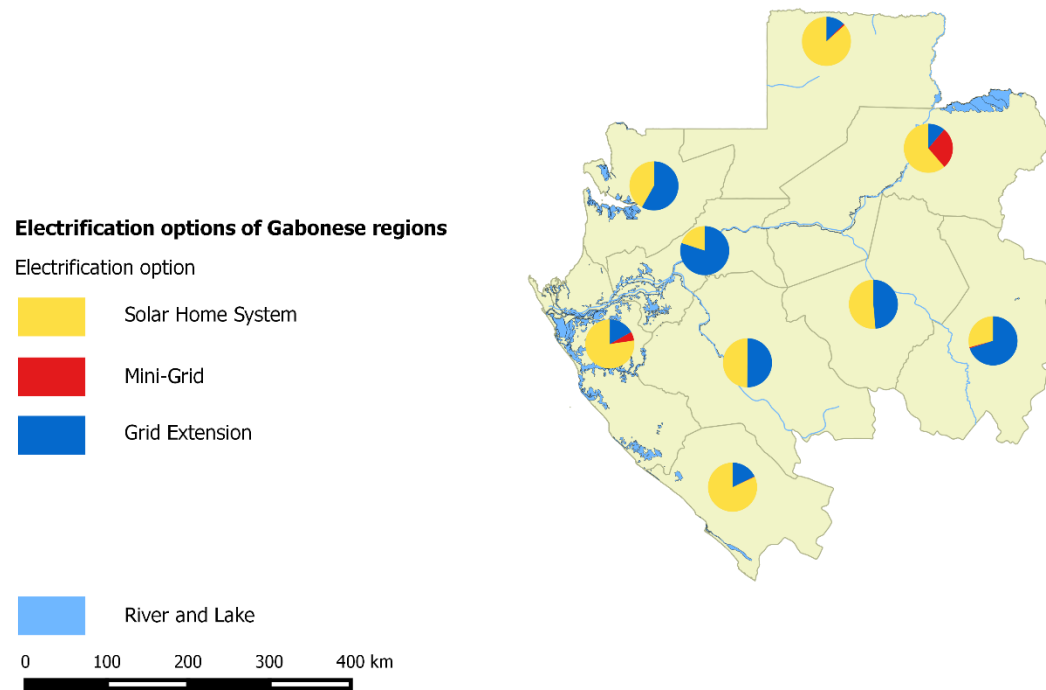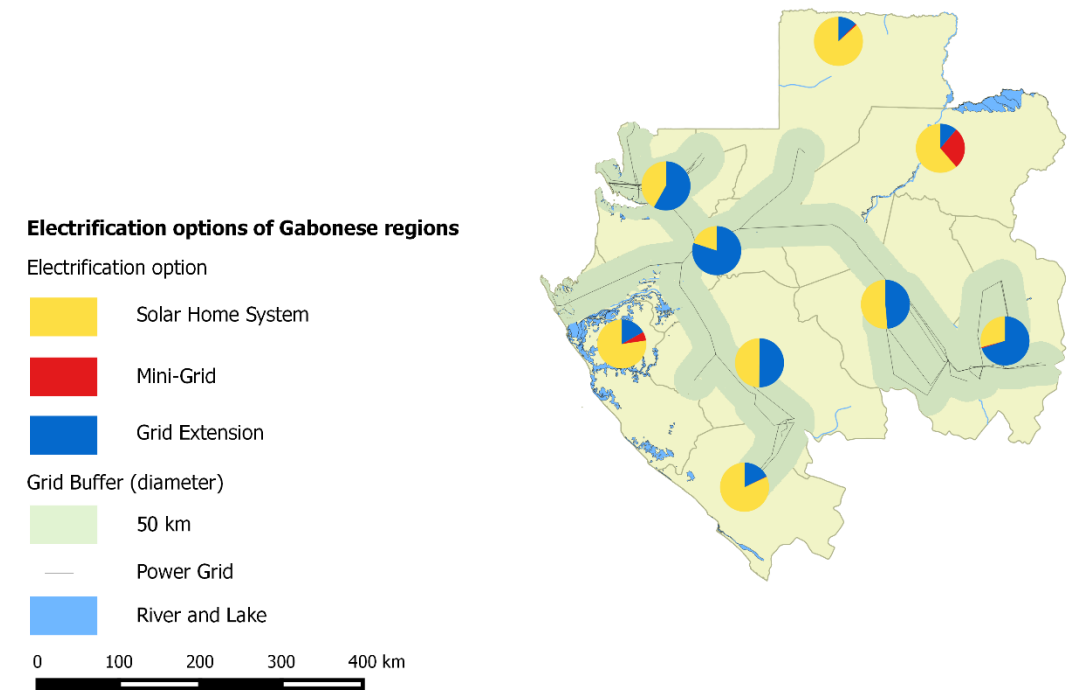

# Electrification option in all Gabonese regions: GridBuilt-SHSDom

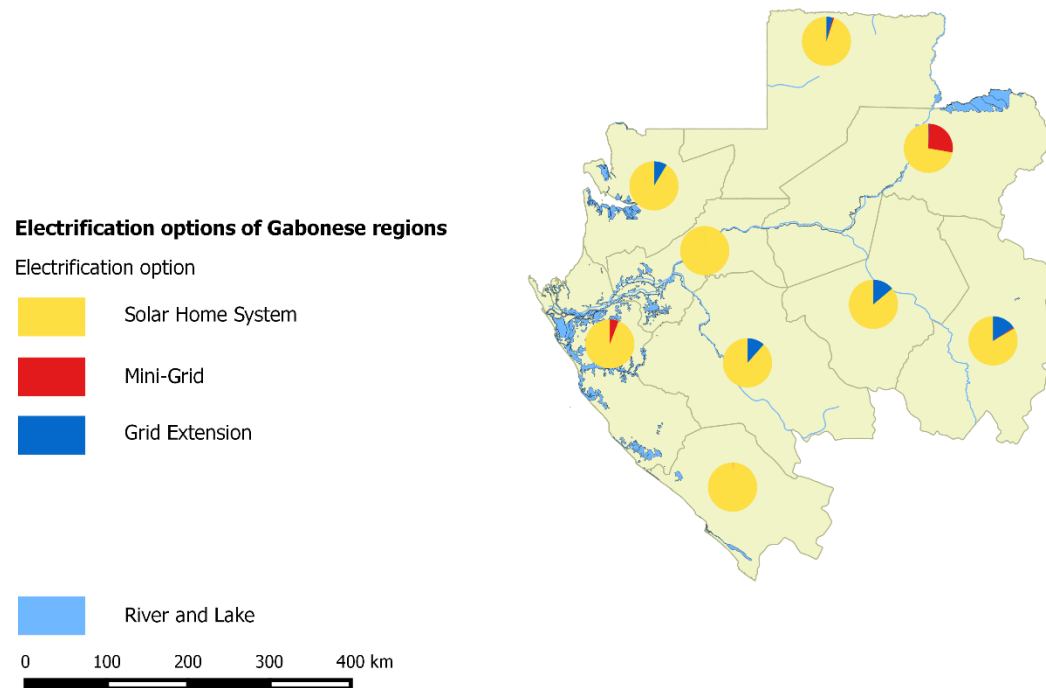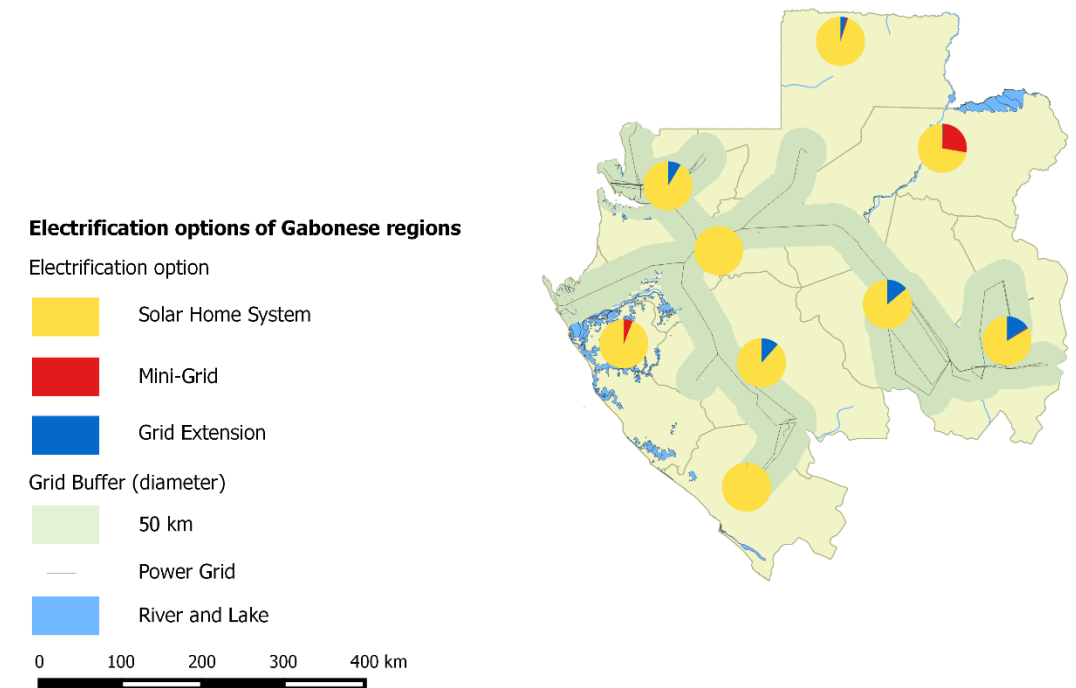

# Electrification option: GridBuilt-SHSDom

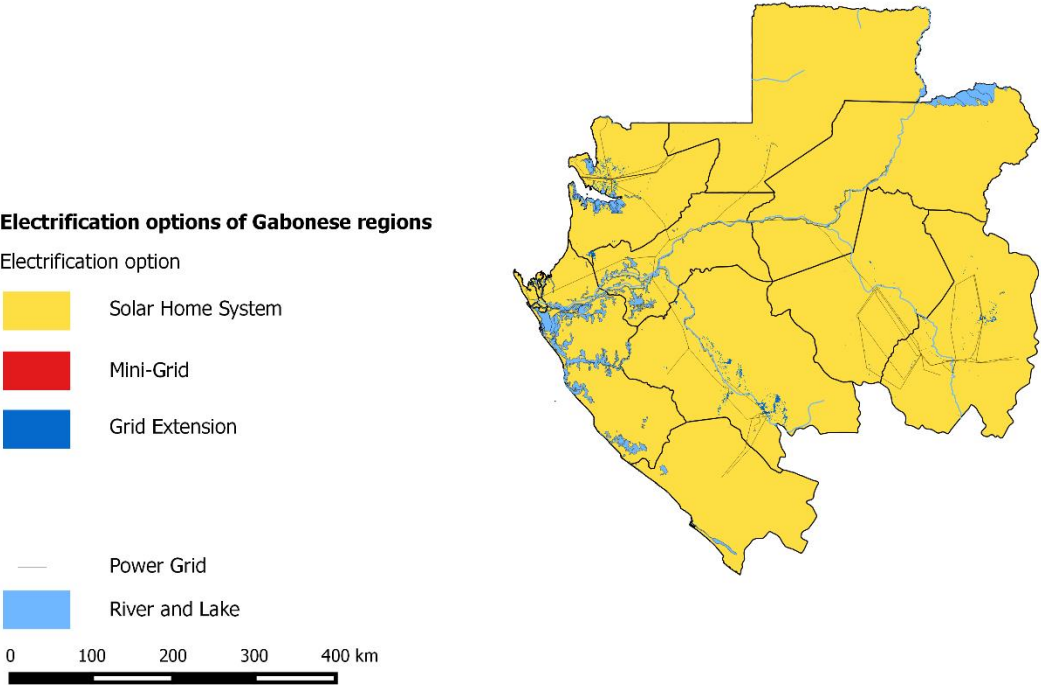

# Electrification option: GridBuilt-GridDom

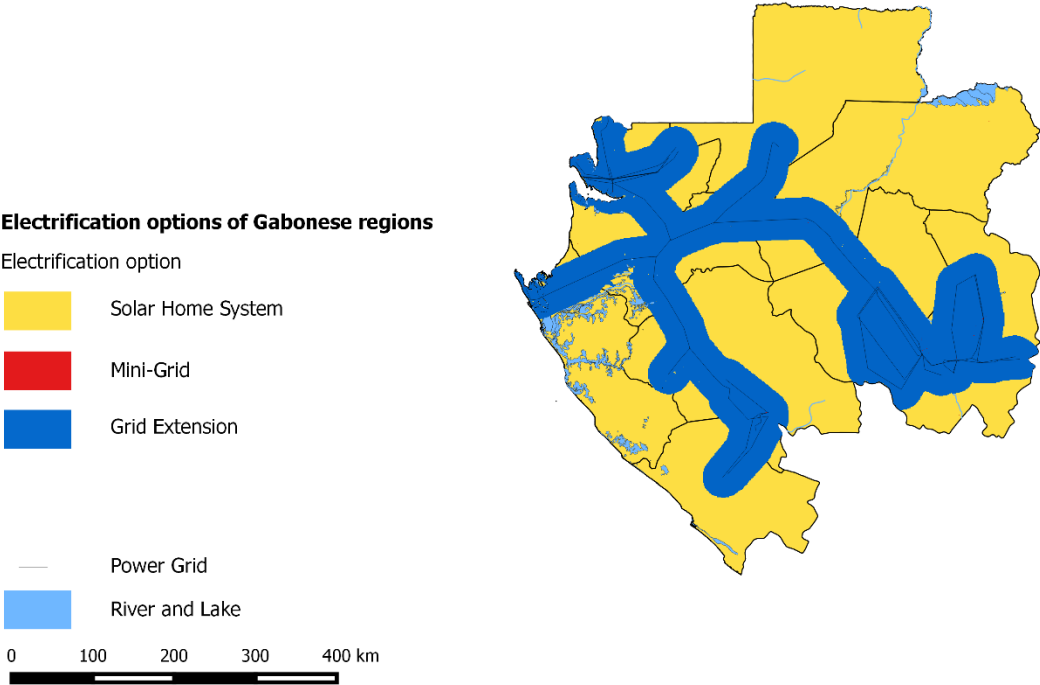

Share of electrification options in all Gabonese regions

SHS (%) Mini-Grid Grid (%)

GridBuilt-GridDom

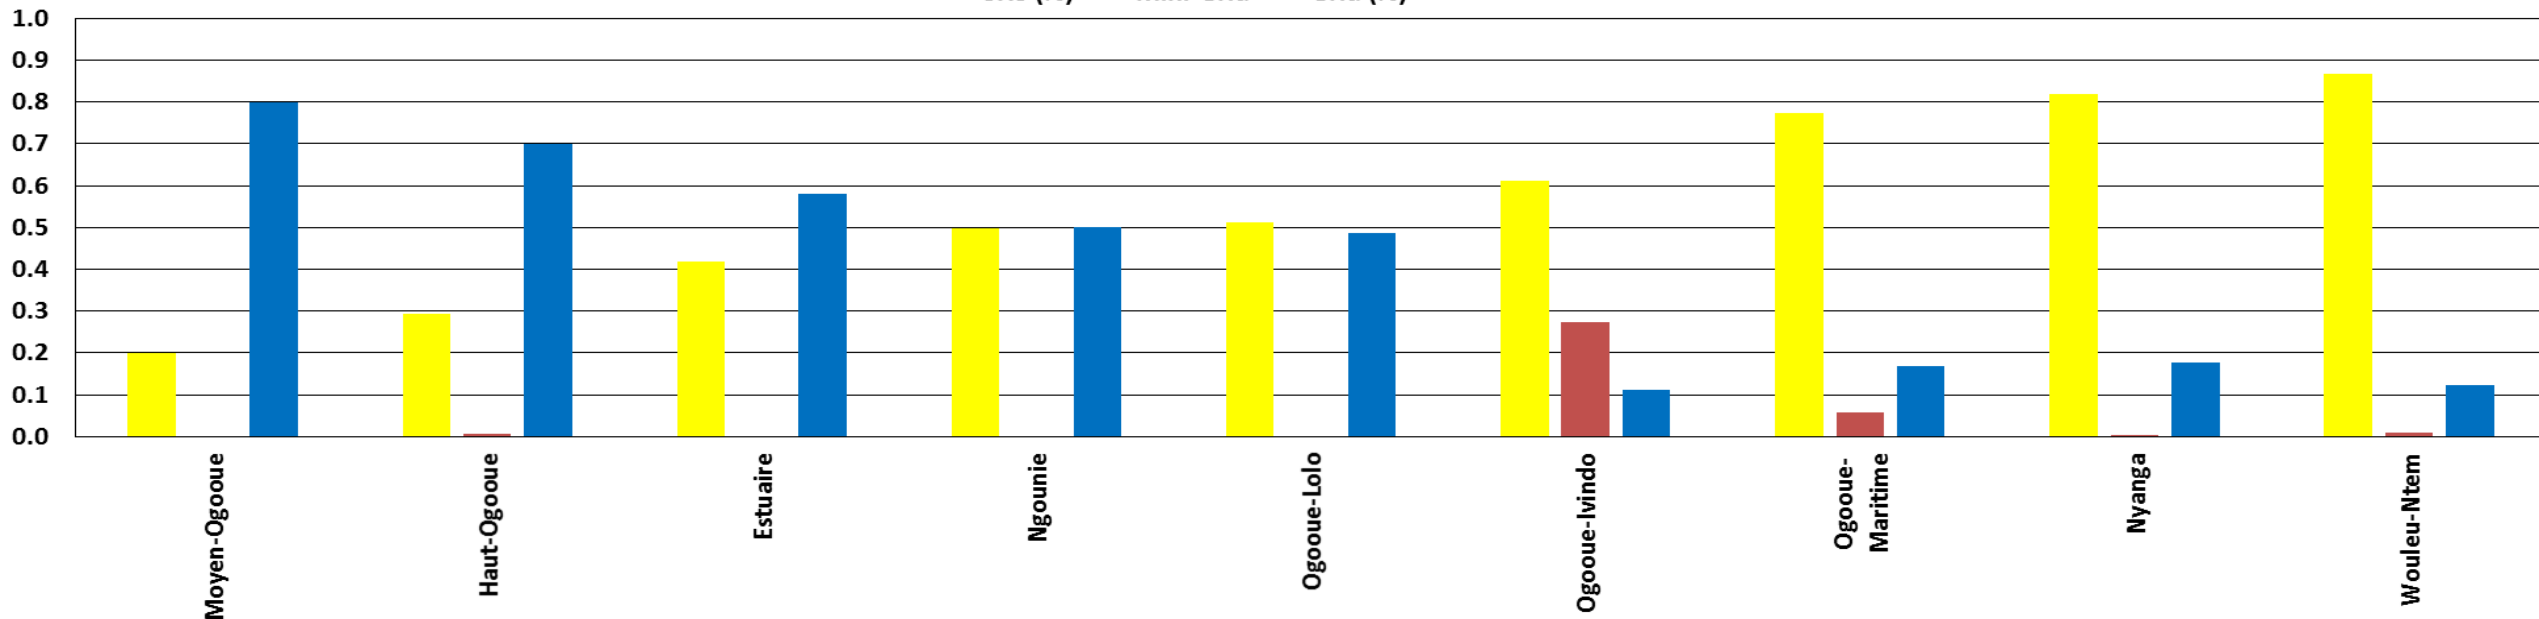

Share of electrification options in all Gabonese regions

SHS (%) Mini-Grid Grid (%)

GridBuilt-SHSDom

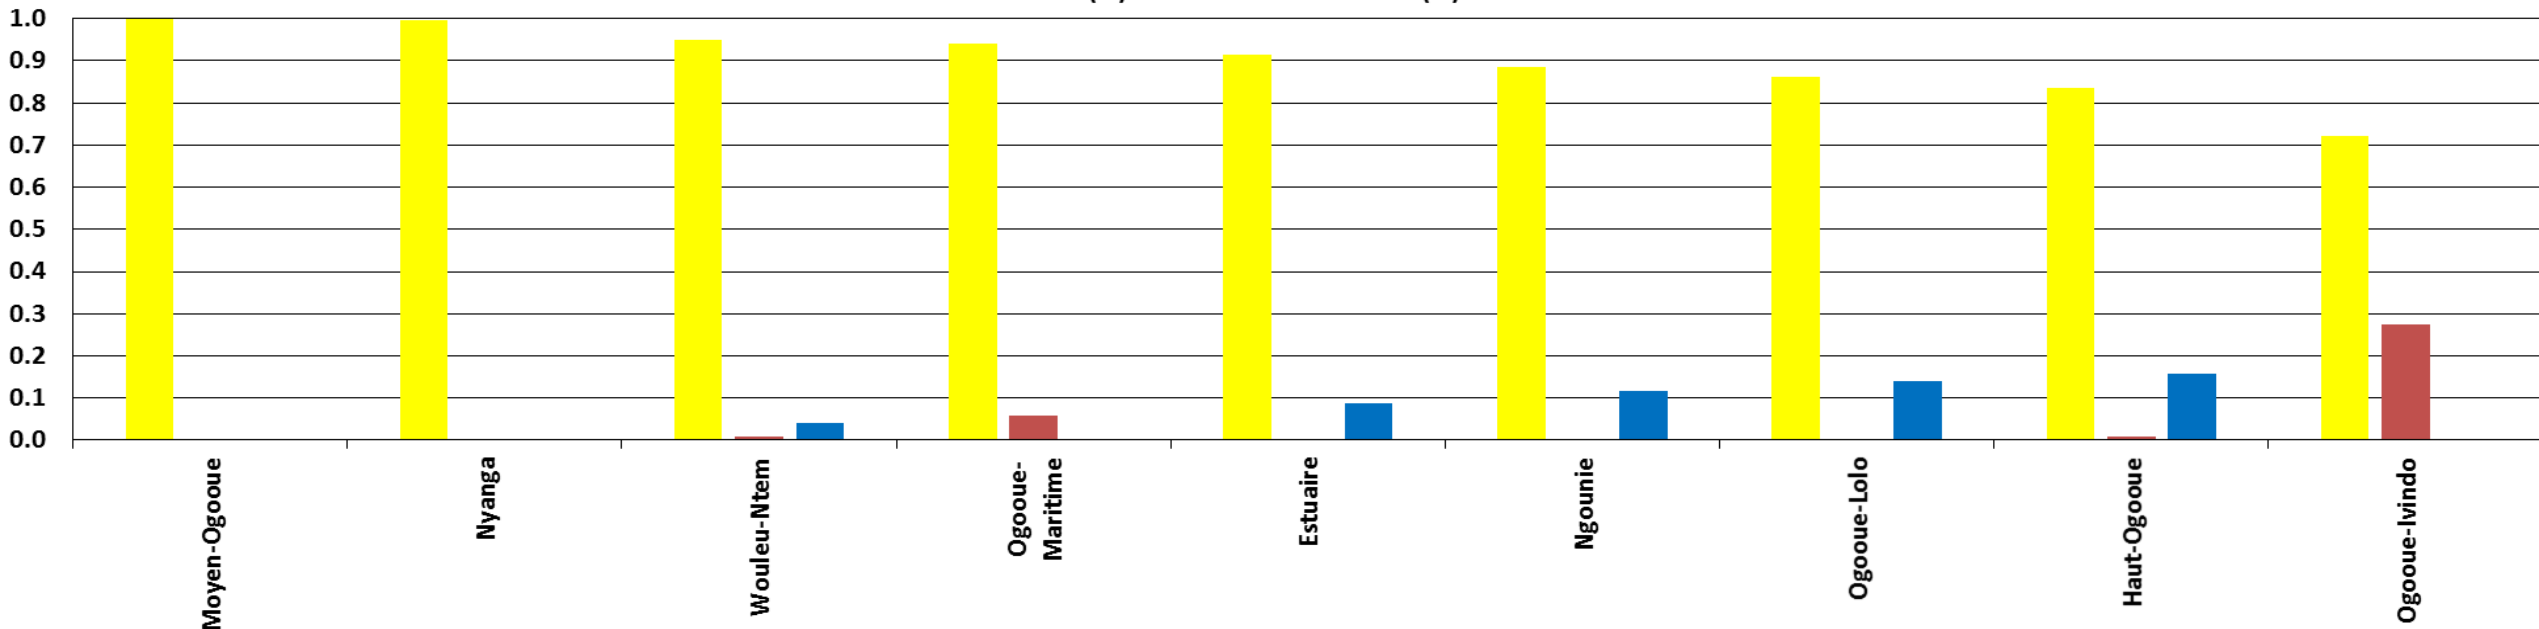

# Electrification option in all Gabonese regions: GridPlanned-GridDom

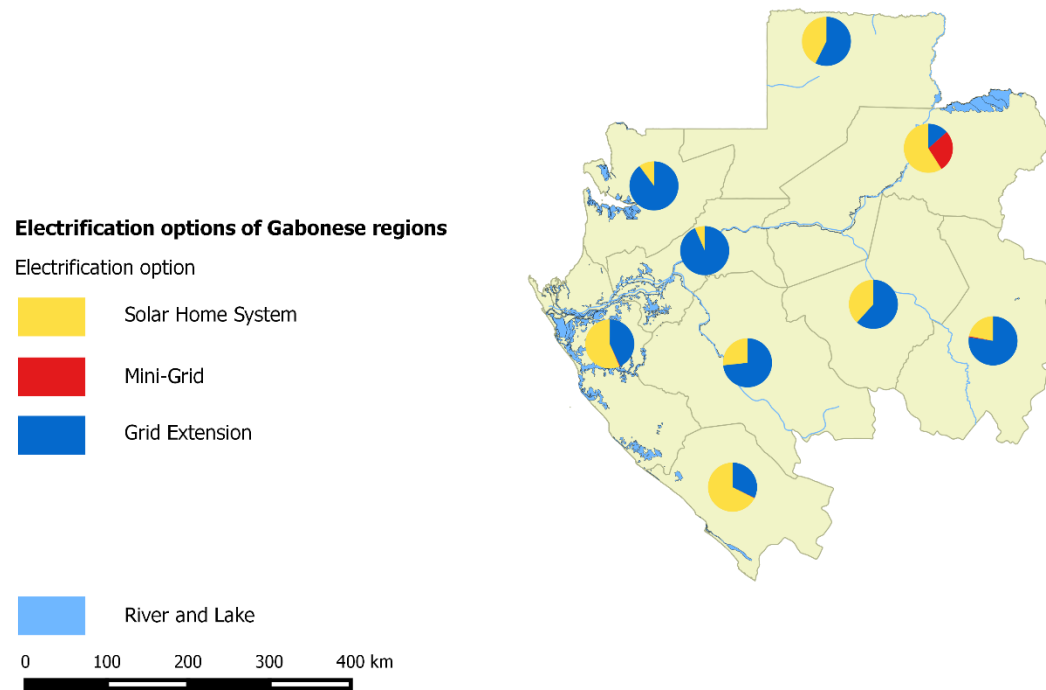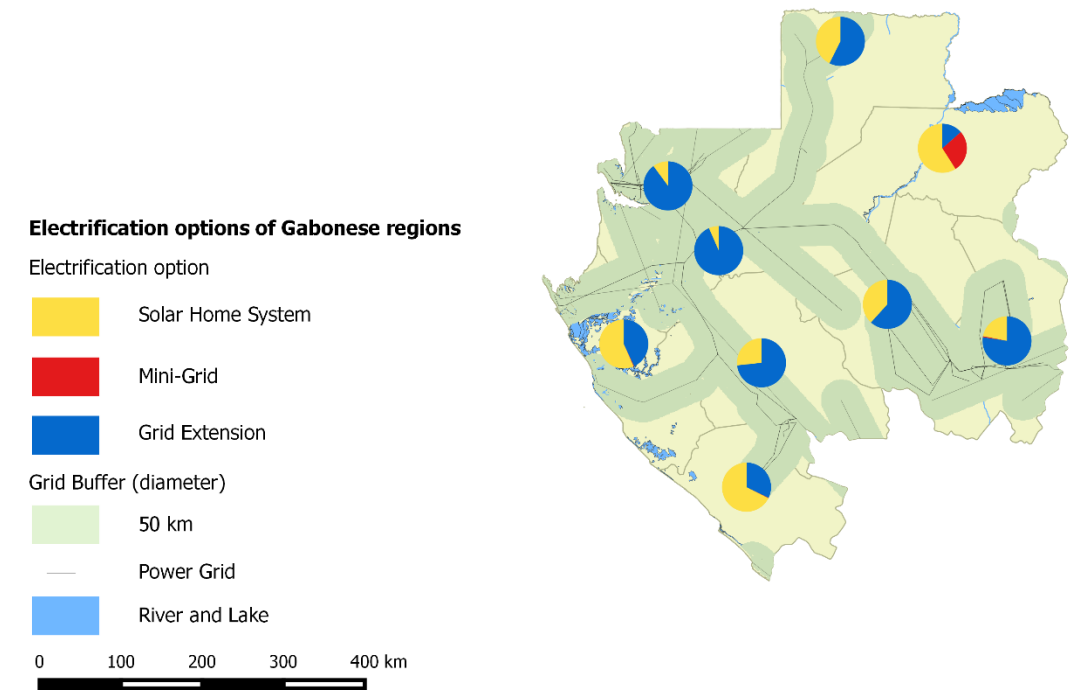

## Electrification option in all Gabonese regions: GridPlanned-SHSDom

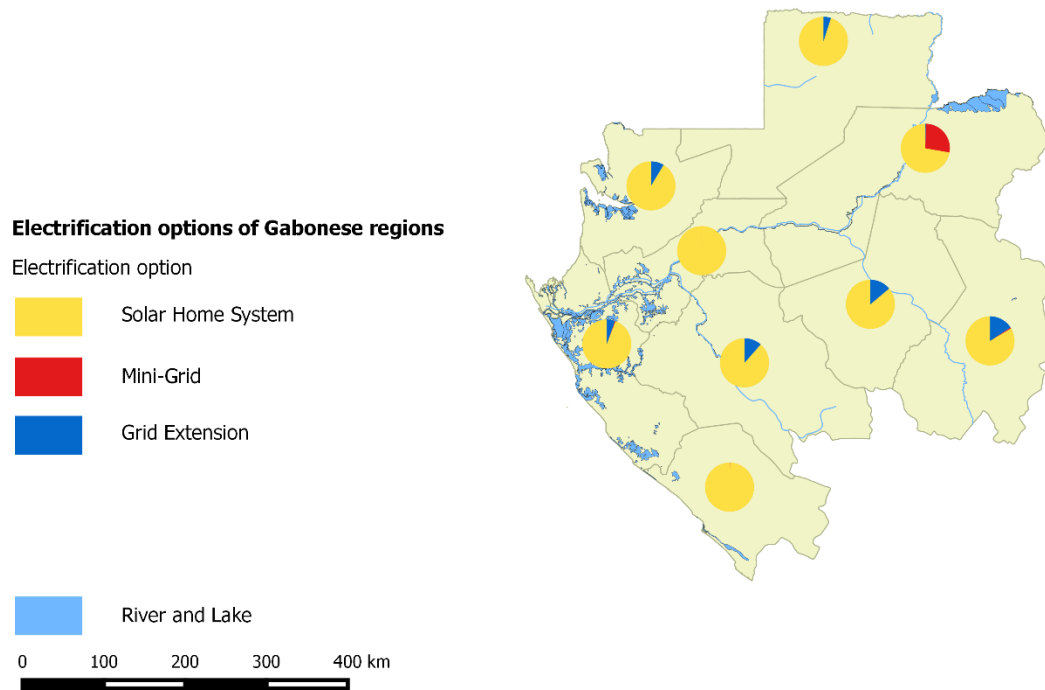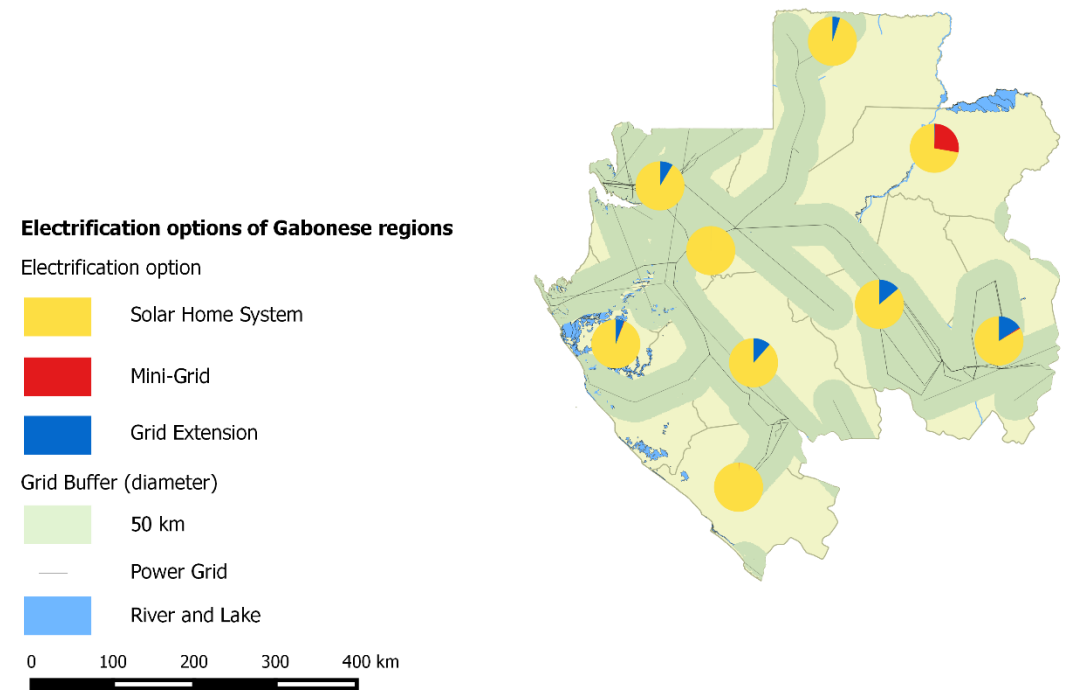

# Electrification option: GridPlanned-SHSDom

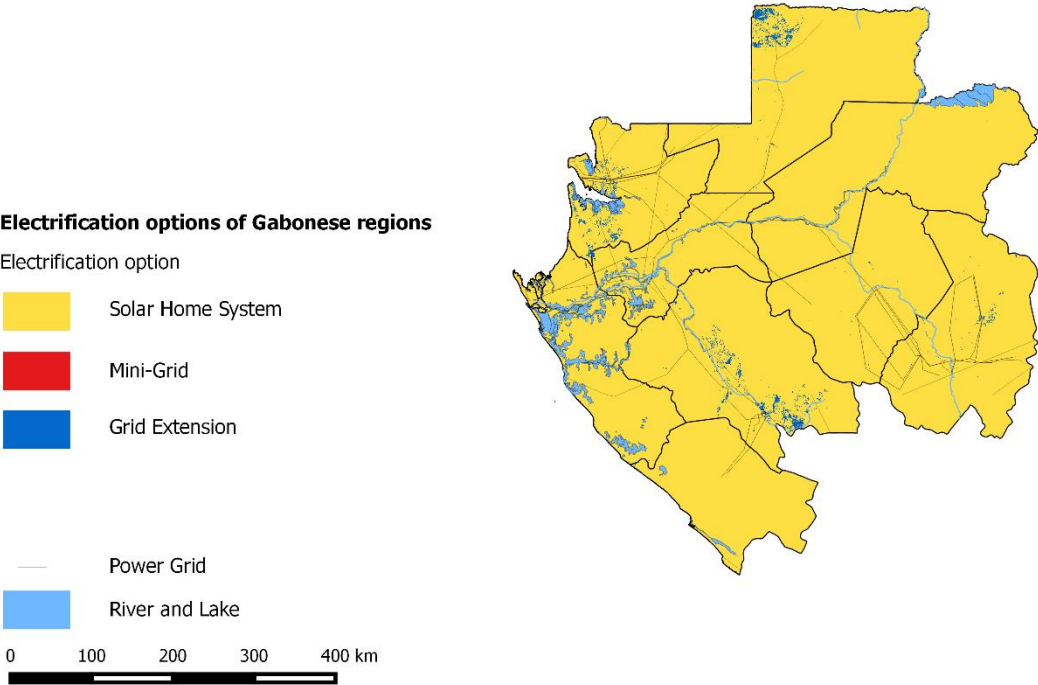

# Electrification option: GridPlanned-GridDom

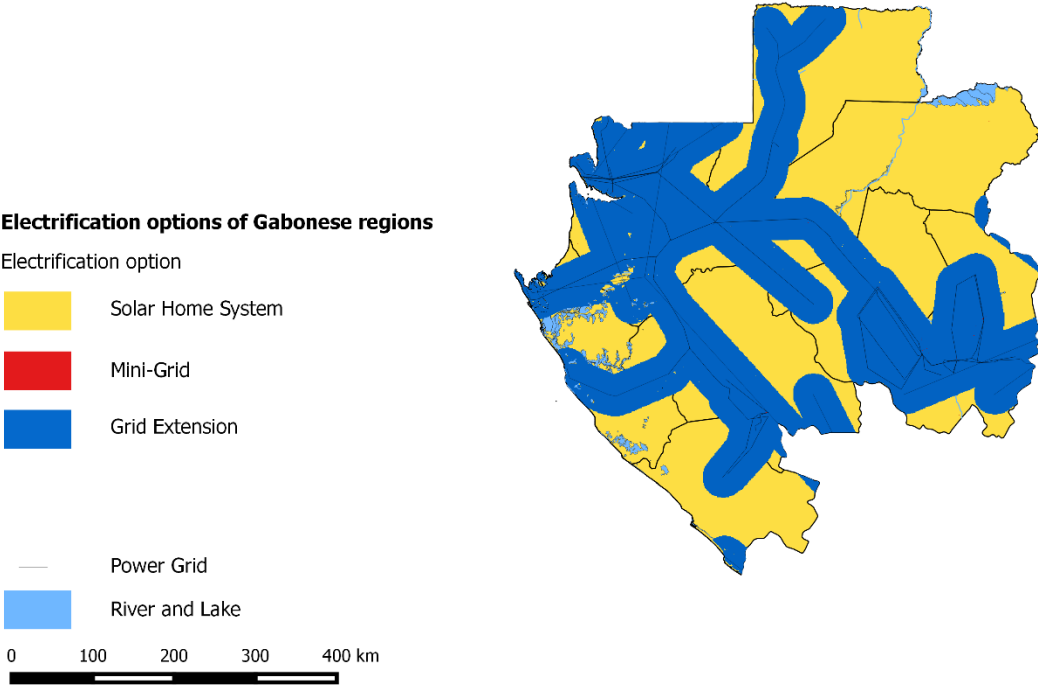

Share of electrification options in all Gabonese regions

SHS (%) Mini-Grid Grid (%)

GridPlanned-GridDom

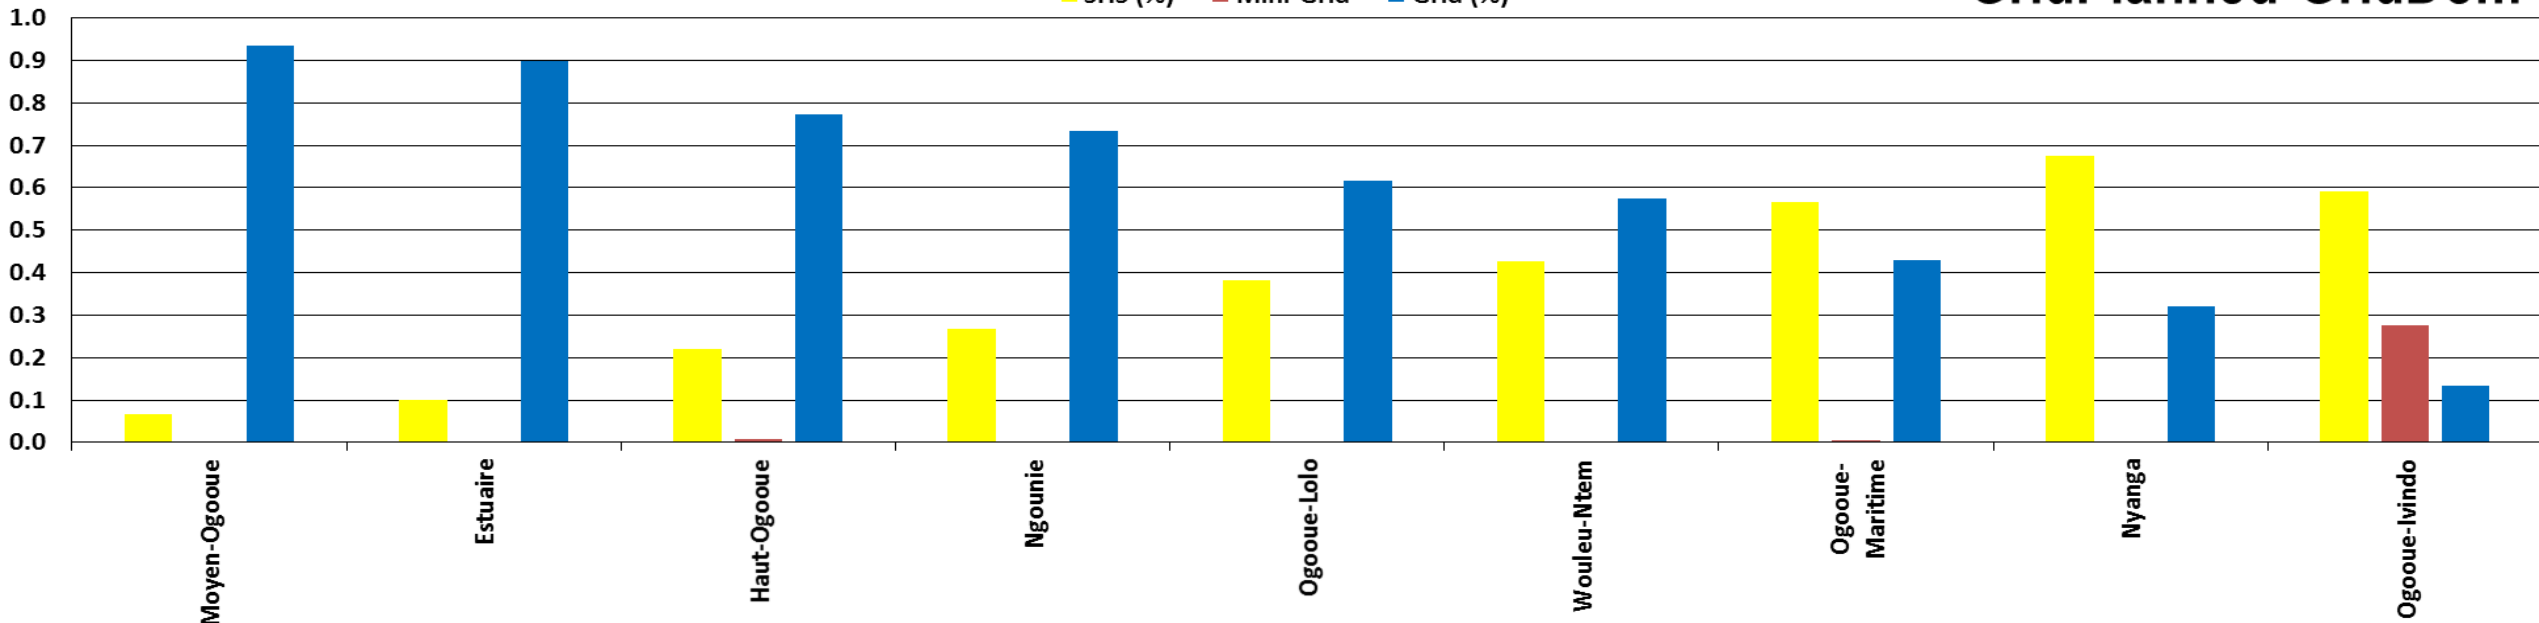

Share of electrification options in all Gabonese regions

SHS (%) Mini-Grid Grid (%)

GridPlanned-SHSDom

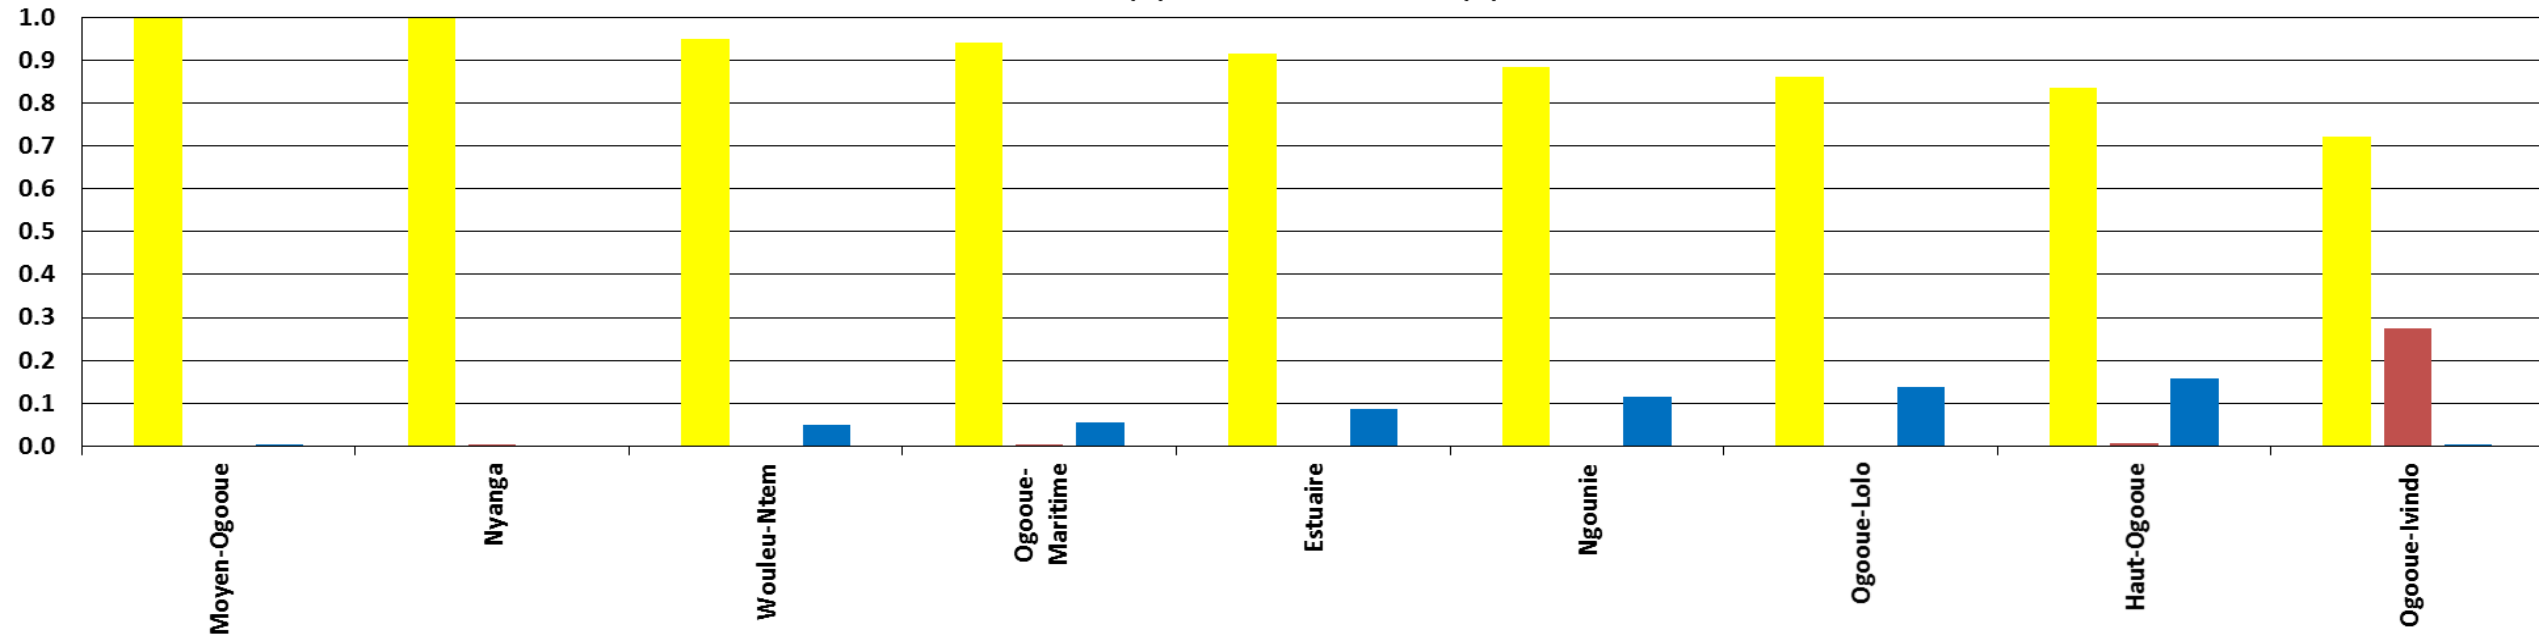

# Republic of Congo

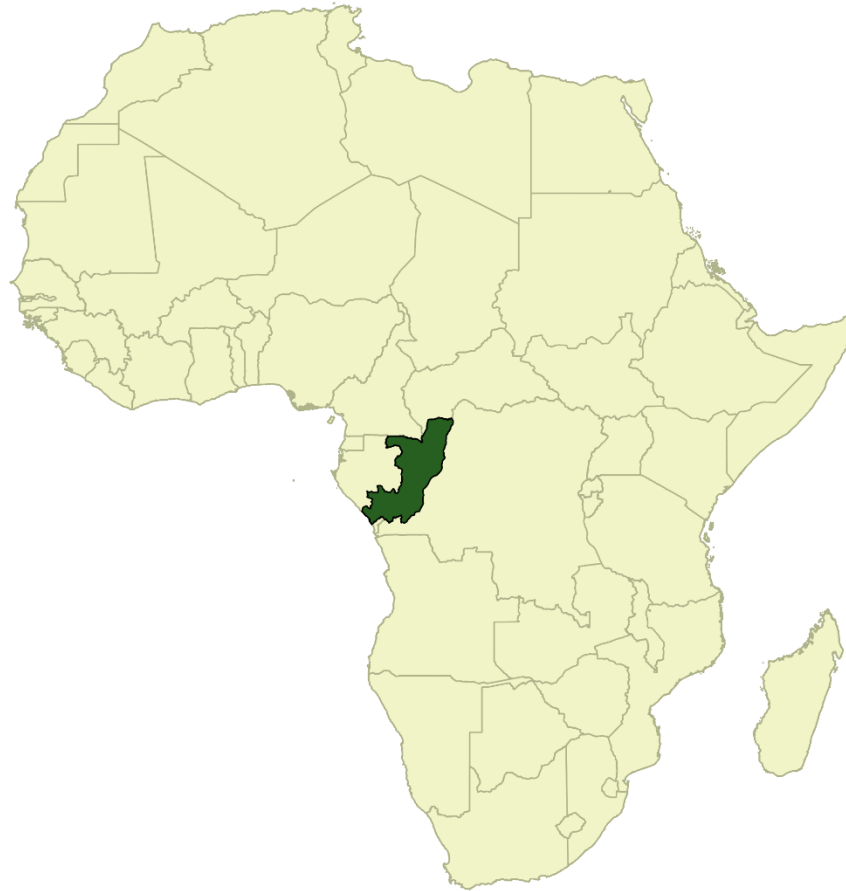

# Night light emission and Population of Congolese regions

Night light emission in Congo

Detected night lights

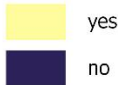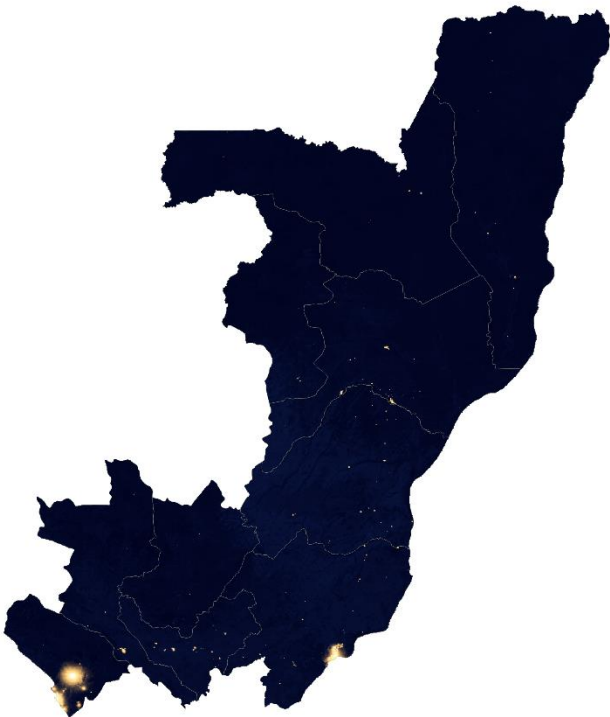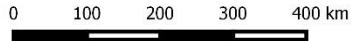

Population structure of Congo

Population density (people/750x750m<sup>2</sup>)

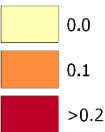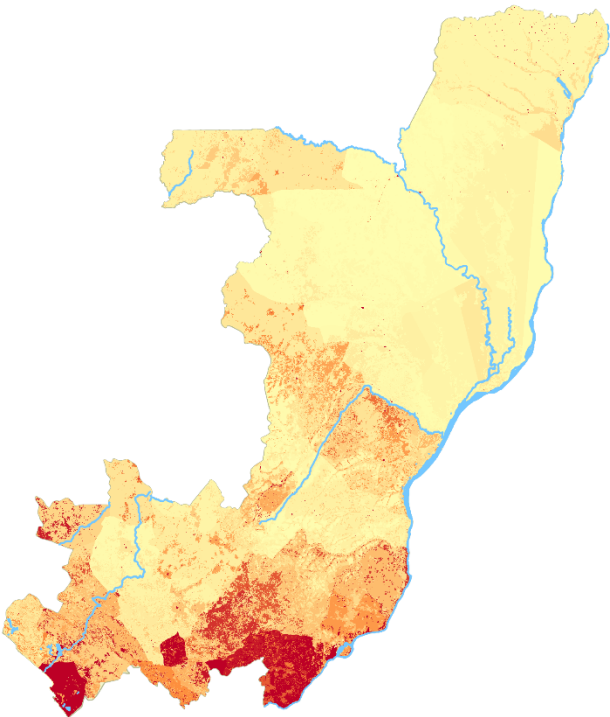

River and Lake

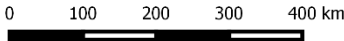

# Electrification option in all Congolese regions: GridBuilt-GridDom

## Electrification options of Congolese regions

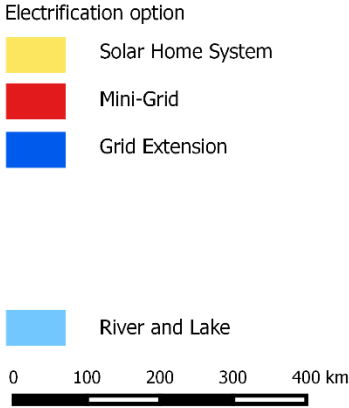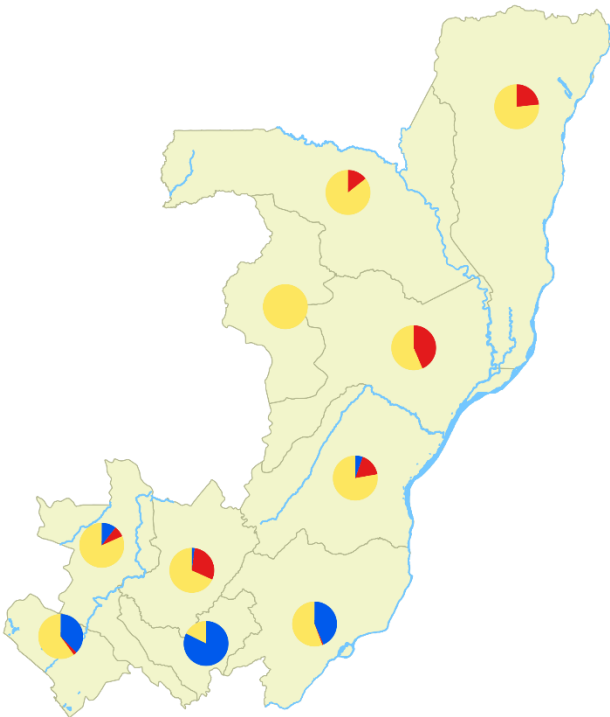

## Electrification options of Congolese regions

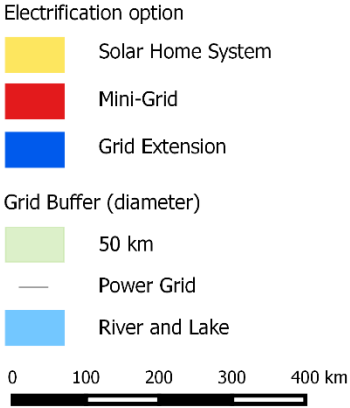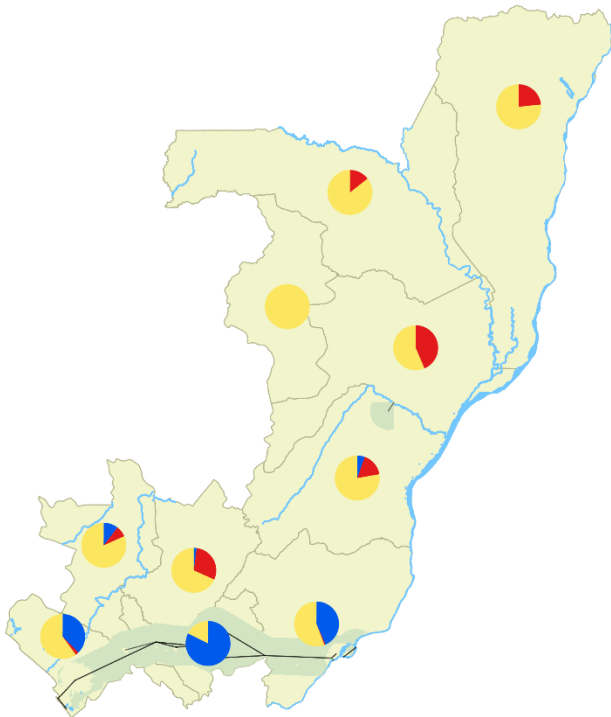

# Electrification option in all Congolese regions: GridBuilt-SHSDom

## Electrification options of Congolese regions

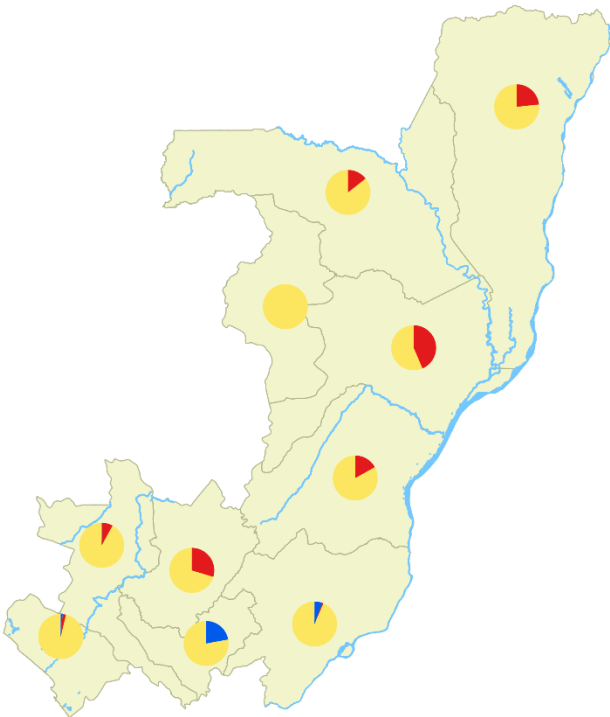

## Electrification options of Congolese regions

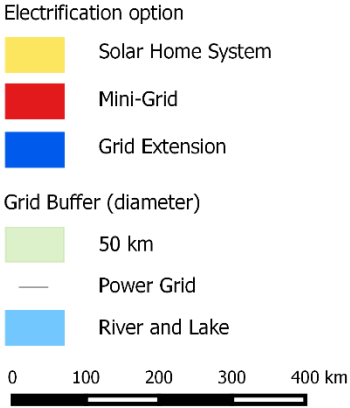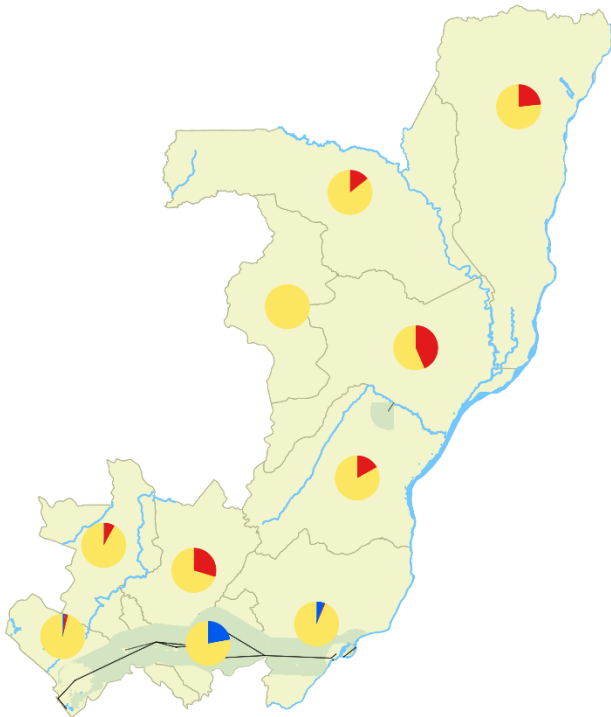

# Electrification option: GridBuilt-SHSDom

Electrification options of Congolese regions

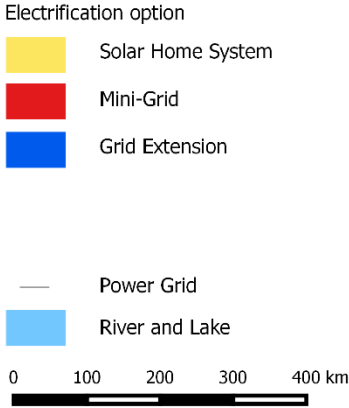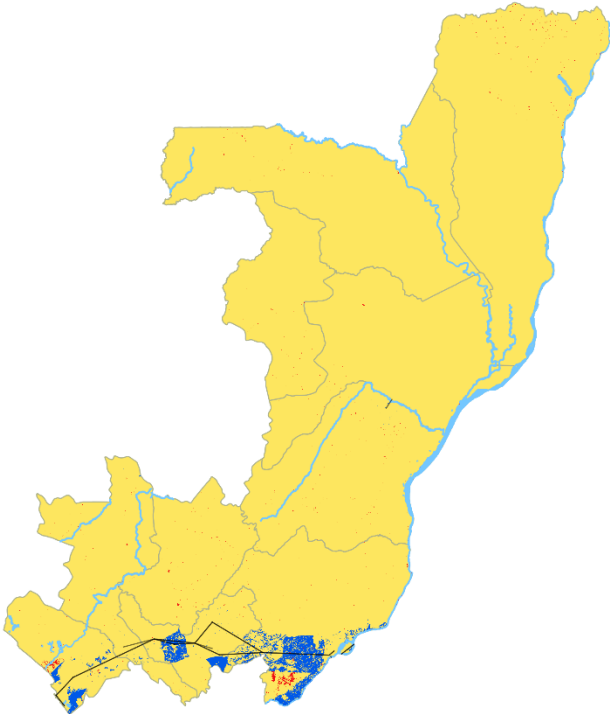

# Electrification option: GridBuilt-GridDom

Electrification options of Congolese regions

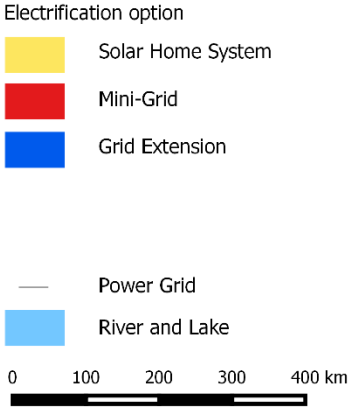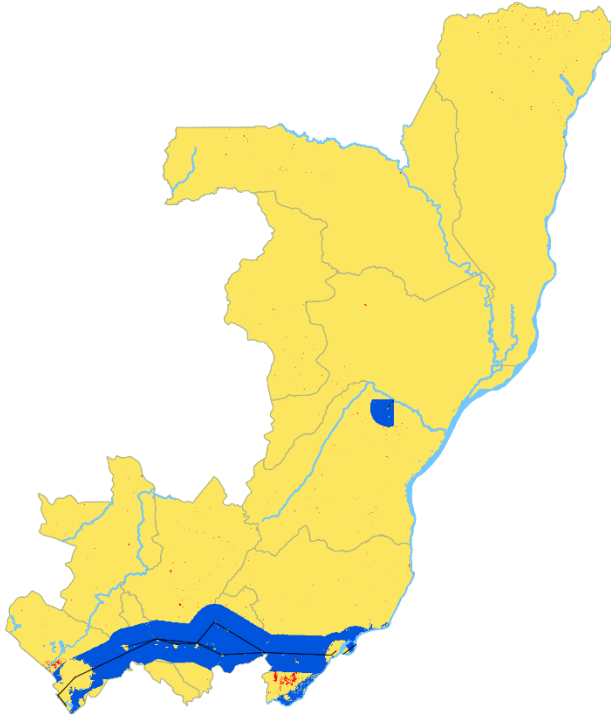

Share of electrification options in all Congolese regions

SHS (%) Mini-Grid (%) Grid (%)

GridBuilt-GridDom

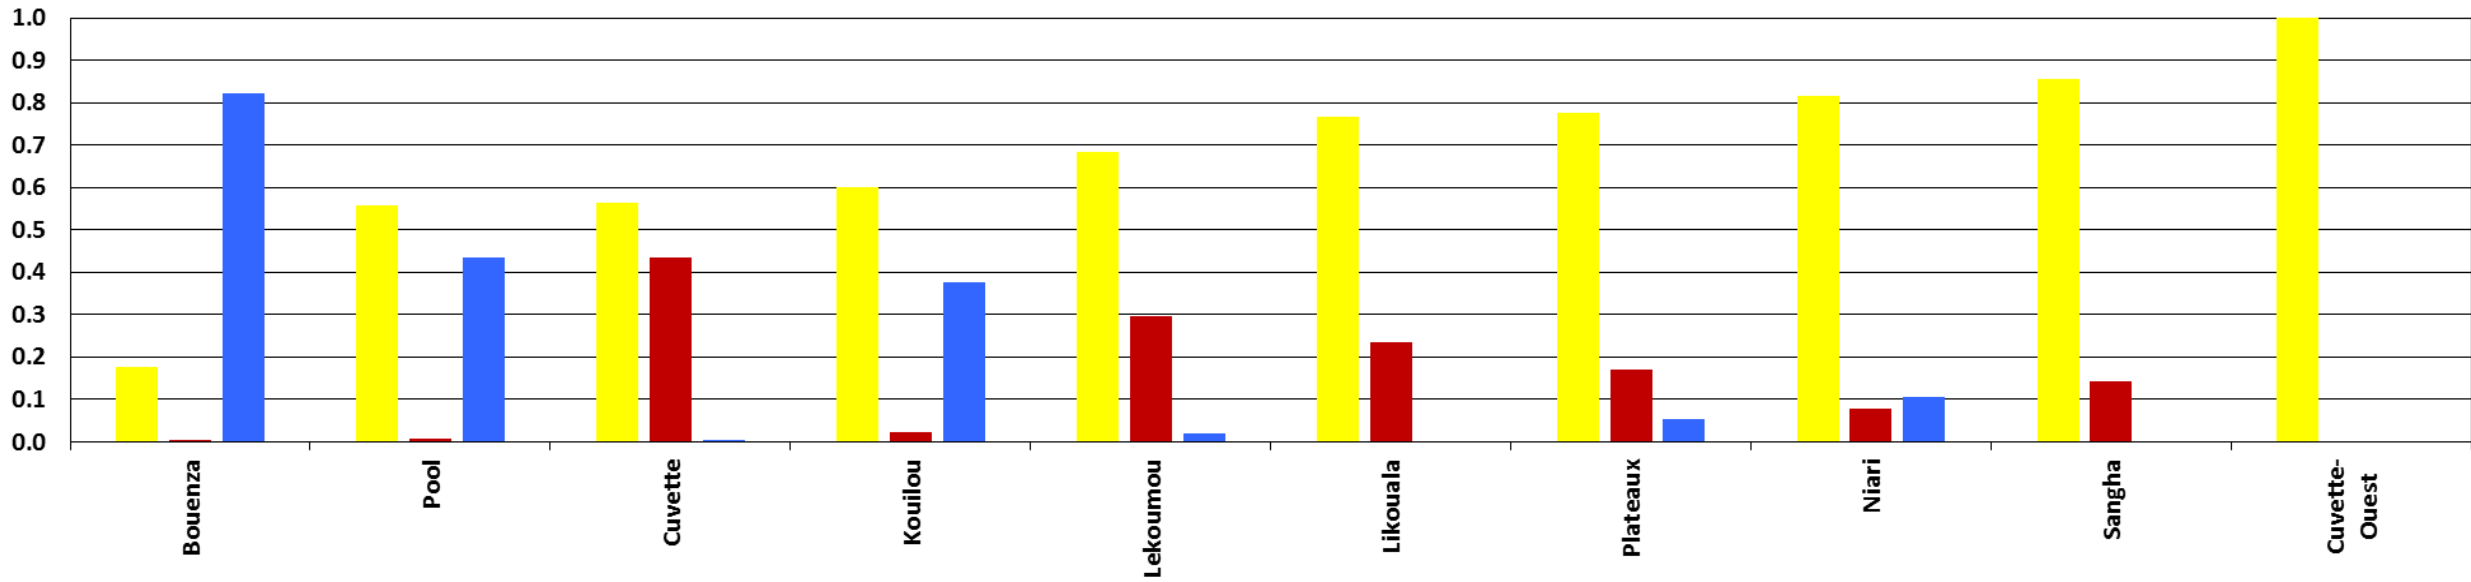

Share of electrification options in all Congolese regions

SHS (%) Mini-Grid (%) Grid (%)

GridBuilt-SHSDom

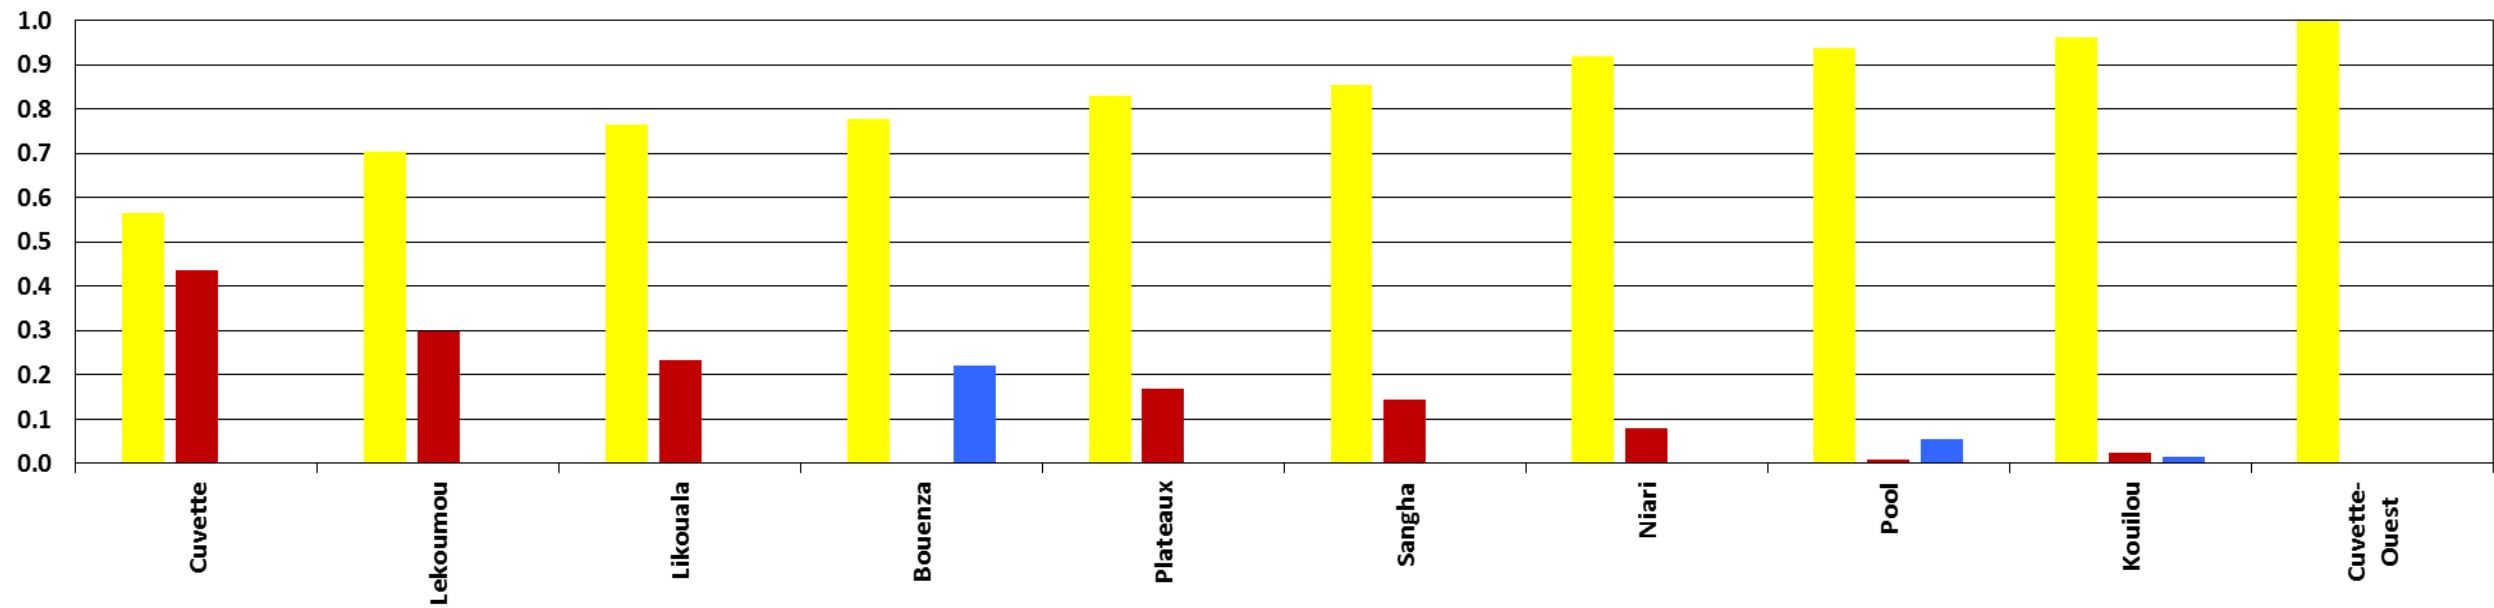

# Electrification option in all Congolese regions: GridPlanned-GridDom

## Electrification options of Congolese regions

Electrification option

-  Solar Home System
-  Mini-Grid
-  Grid Extension

 River and Lake

0 100 200 300 400 km

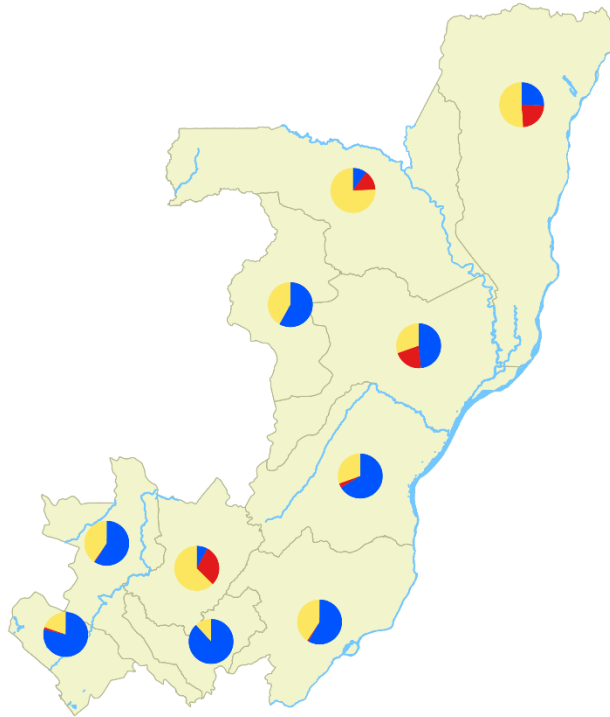

## Electrification options of Congolese regions

Electrification option

-  Solar Home System
-  Mini-Grid
-  Grid Extension

Grid Buffer (diameter)

-  50 km
-  Power Grid
-  River and Lake

0 100 200 300 400 km

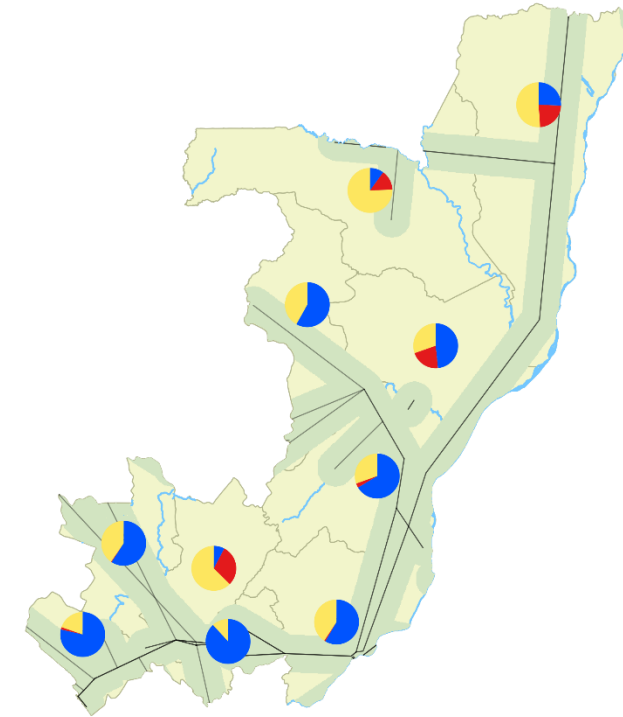

# Electrification option in all Congolese regions: GridPlanned-SHSDom

## Electrification options of Congolese regions

Electrification option

-  Solar Home System
-  Mini-Grid
-  Grid Extension

 River and Lake

0 100 200 300 400 km

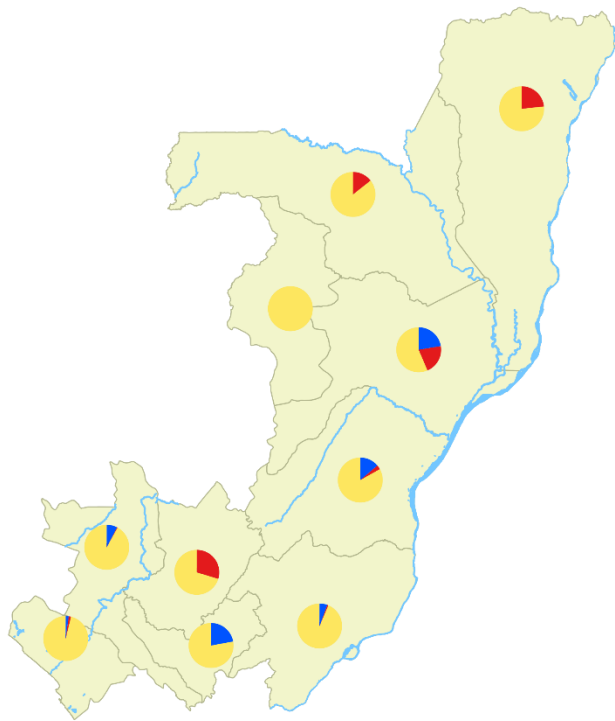

## Electrification options of Congolese regions

Electrification option

-  Solar Home System
-  Mini-Grid
-  Grid Extension

Grid Buffer (diameter)

-  50 km
-  Power Grid
-  River and Lake

0 100 200 300 400 km

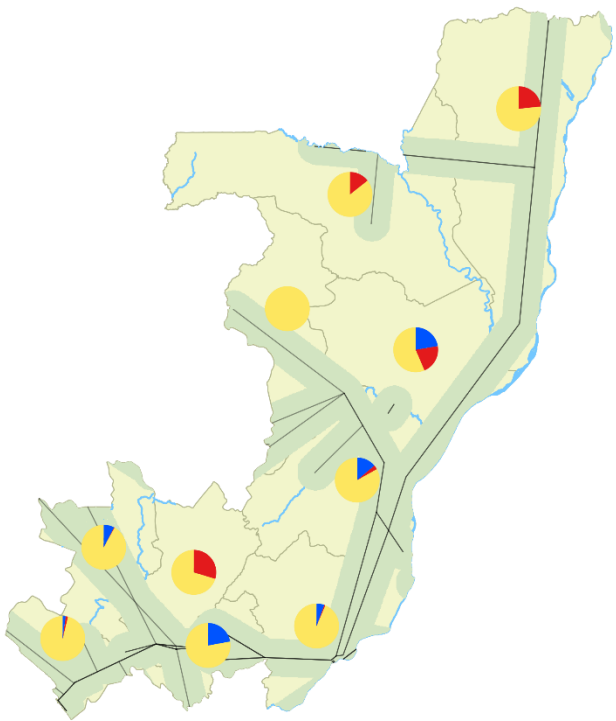

# Electrification option: GridPlanned-SHSDom

# Electrification option: GridPlanned-GridDom

Electrification options of Congolese regions

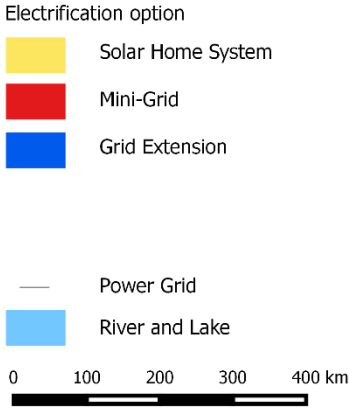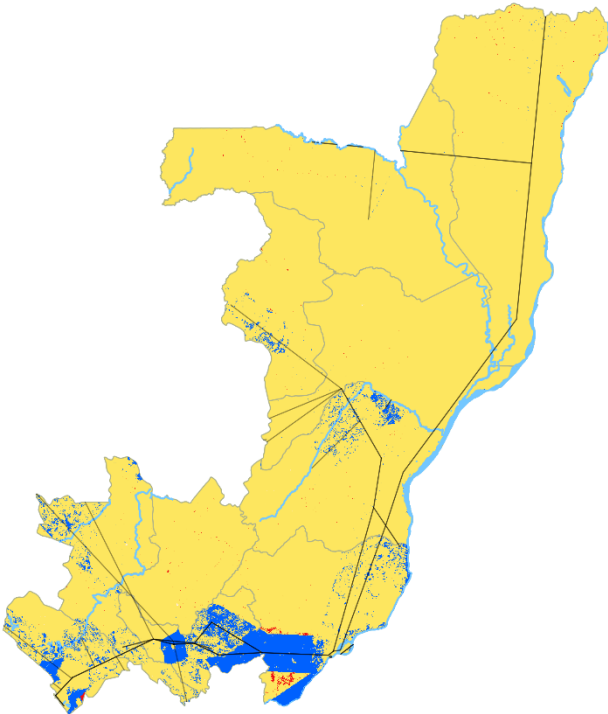

Electrification options of Congolese regions

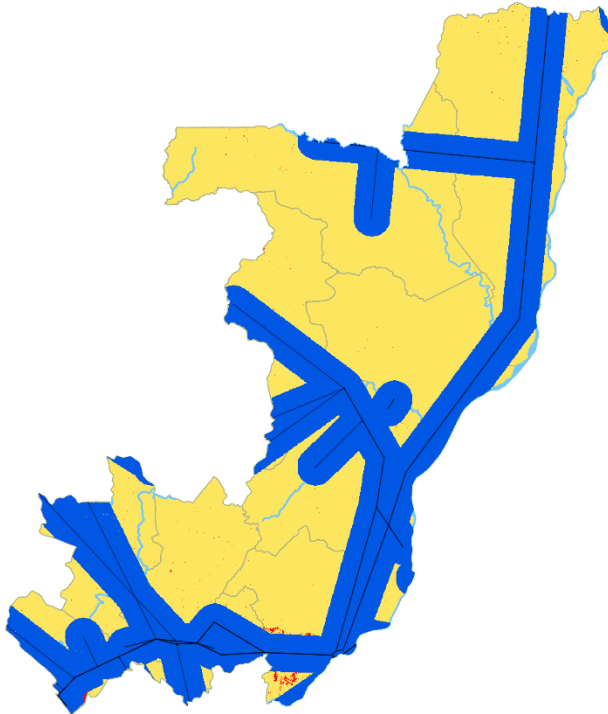

Share of electrification options in all Congolese regions

SHS (%) Mini-Grid (%) Grid (%)

GridPlanned-GridDom

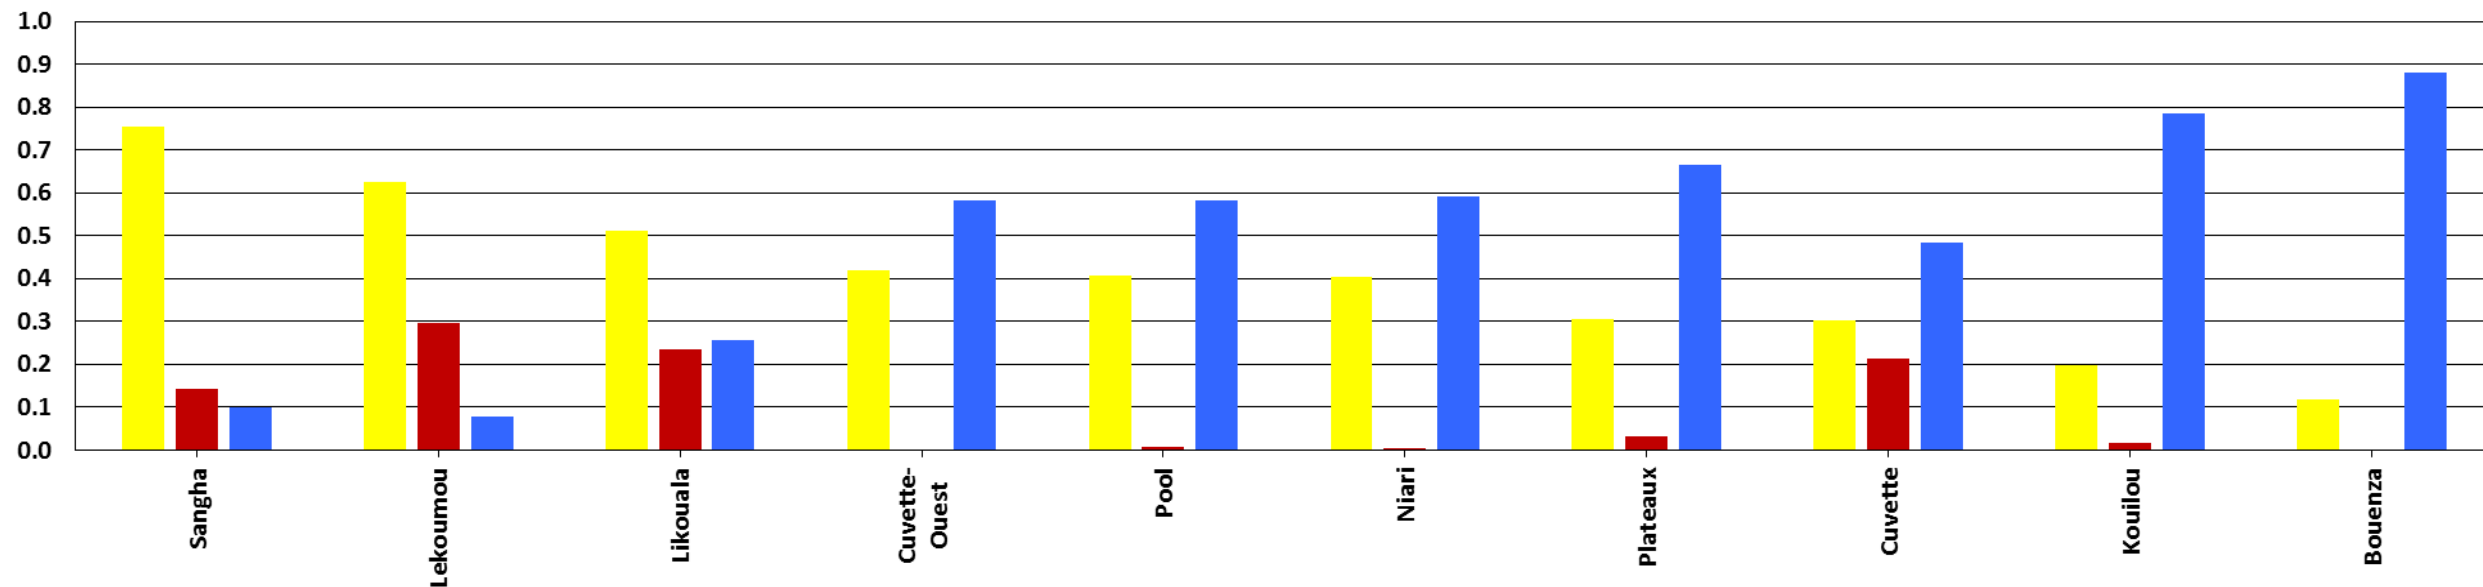

Share of electrification options in all Congolese regions

SHS (%) Mini-Grid (%) Grid (%)

GridPlanned-SHSDom

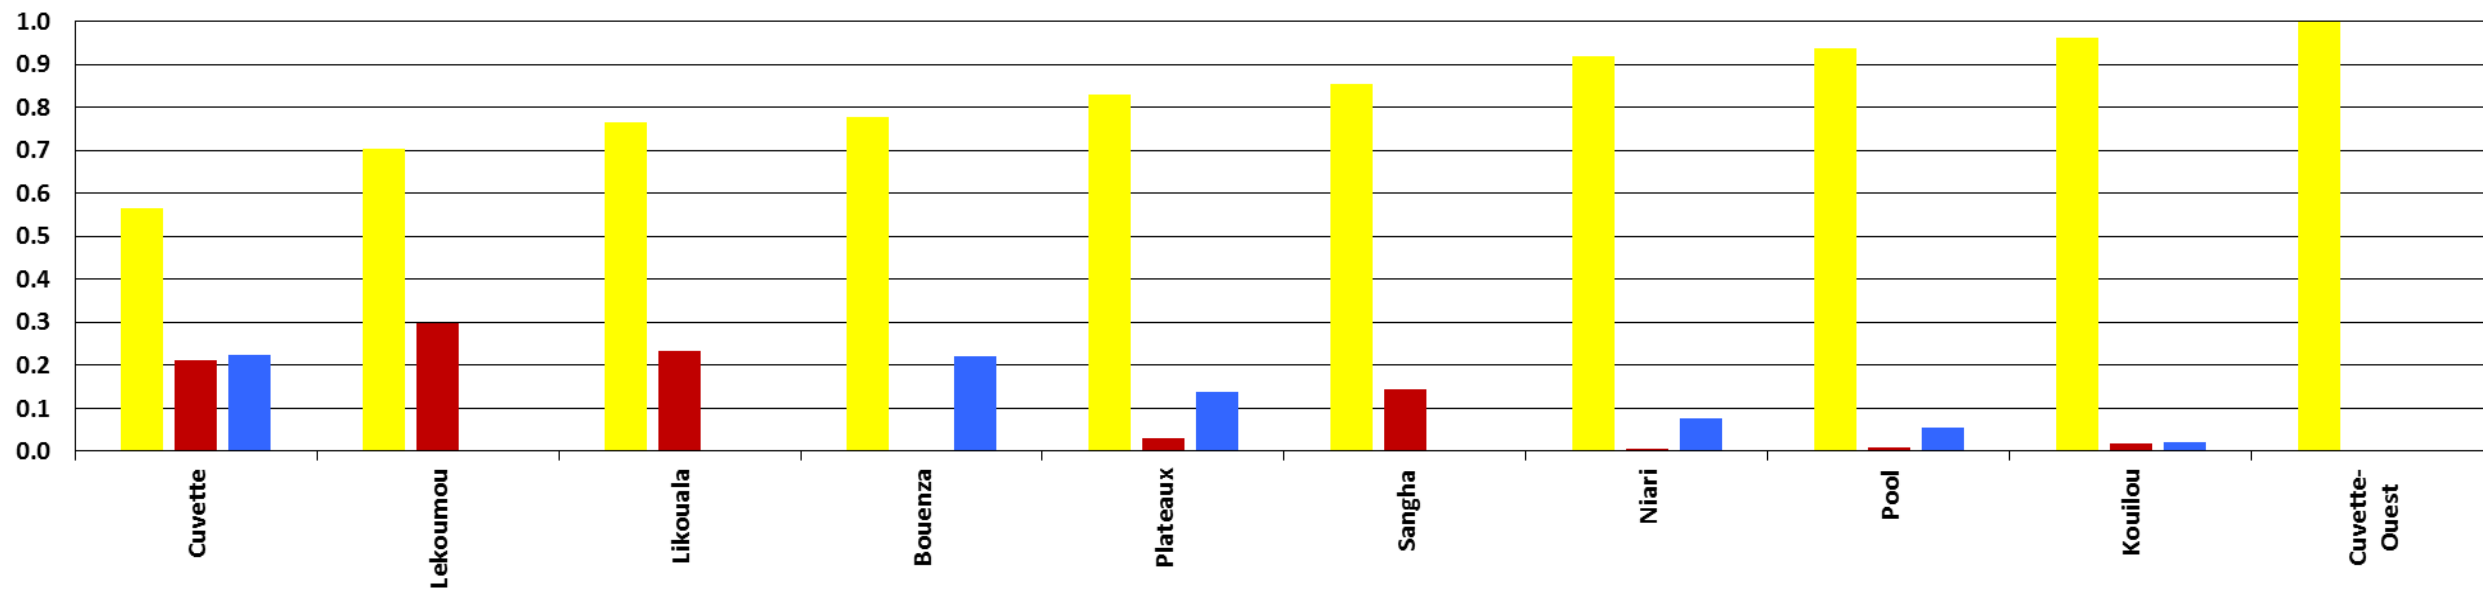

Supplement: s1 [file s1]
