# Supplementary material
Source: MDPI journal article supplement (https://www.mdpi.com/1996-1073/10/11/1899)

# East Africa

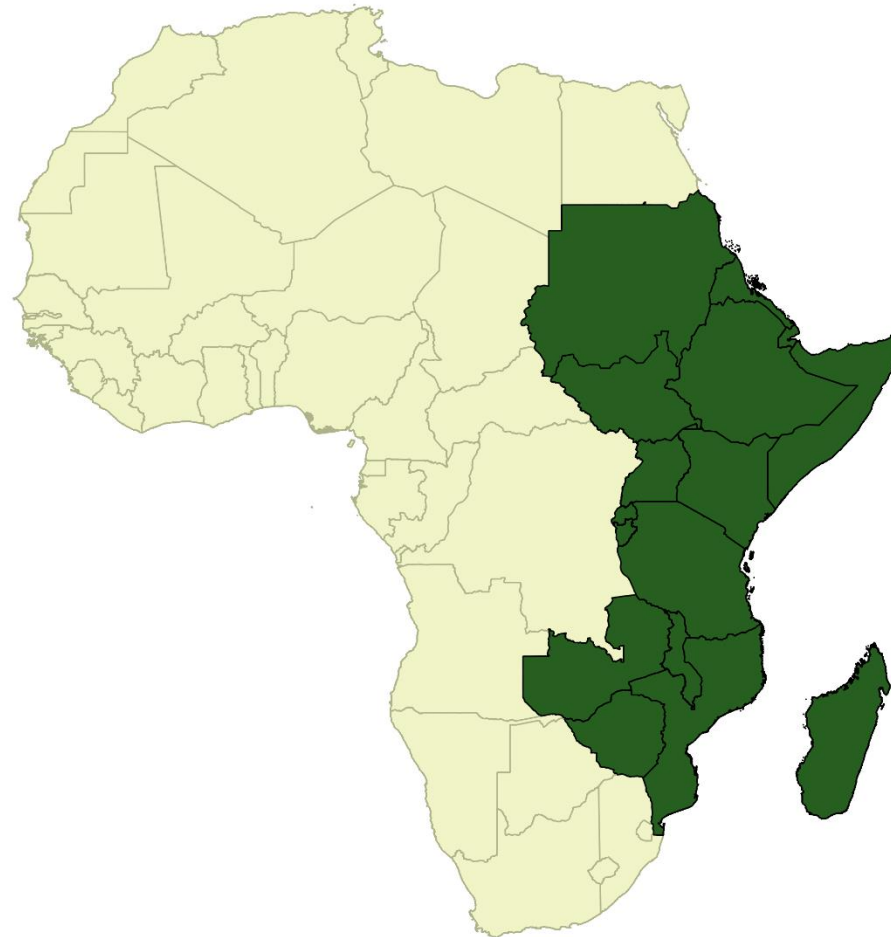

# Burundi

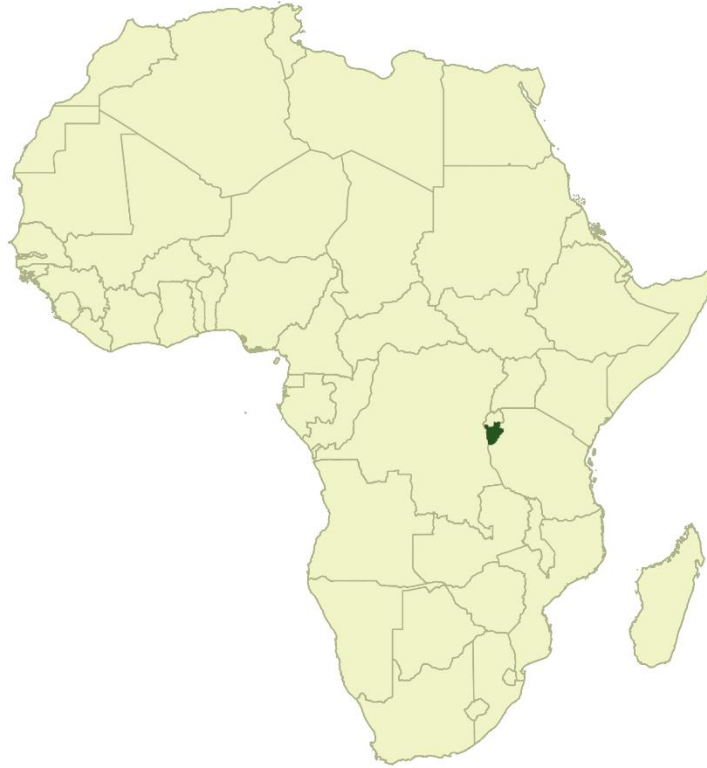

# Night light emission and Population of Burundian regions

## Night light emission in Burundi

Detected night lights

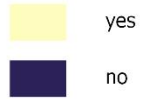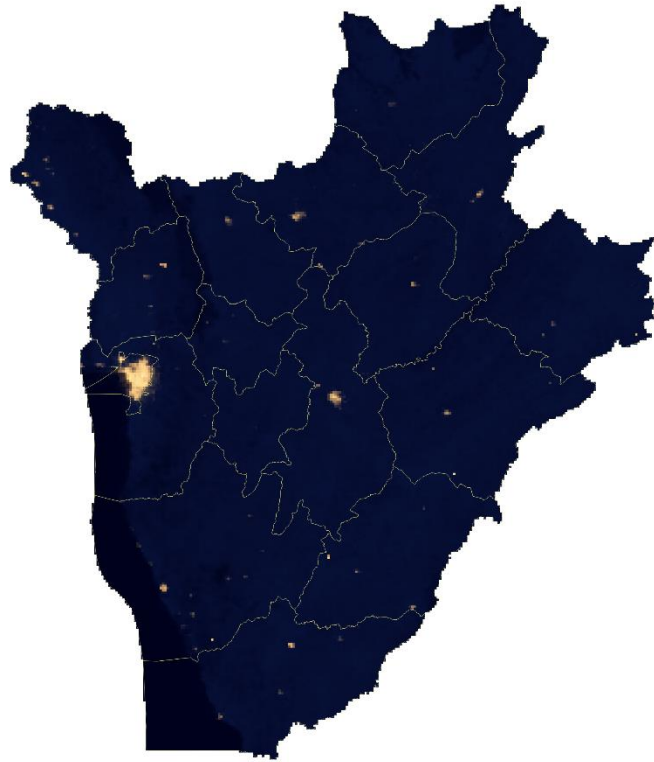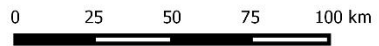

## Population structure of Burundi

Population density (people/750x750m<sup>2</sup>)

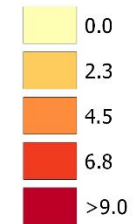

River and Lake (blue)

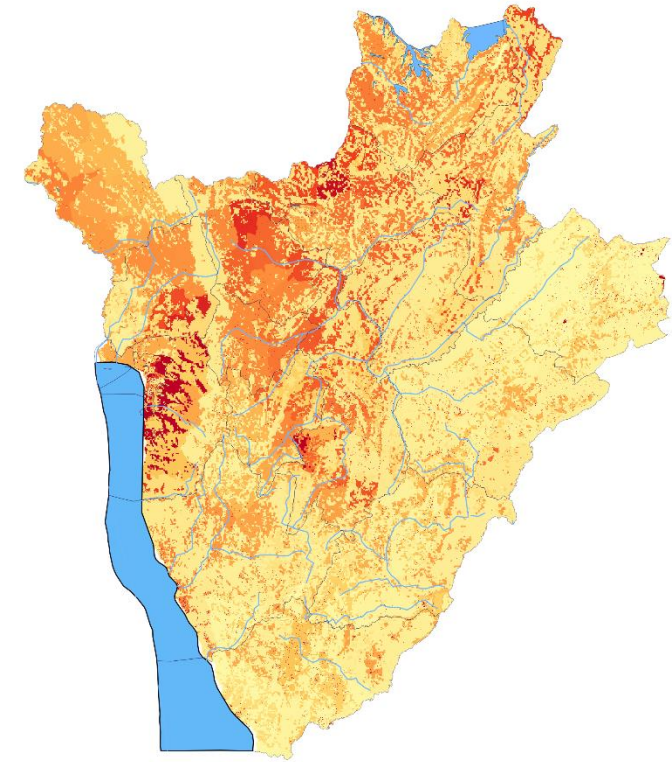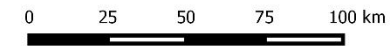

# Electrification option in all Burundian regions: GridBuilt-GridDom

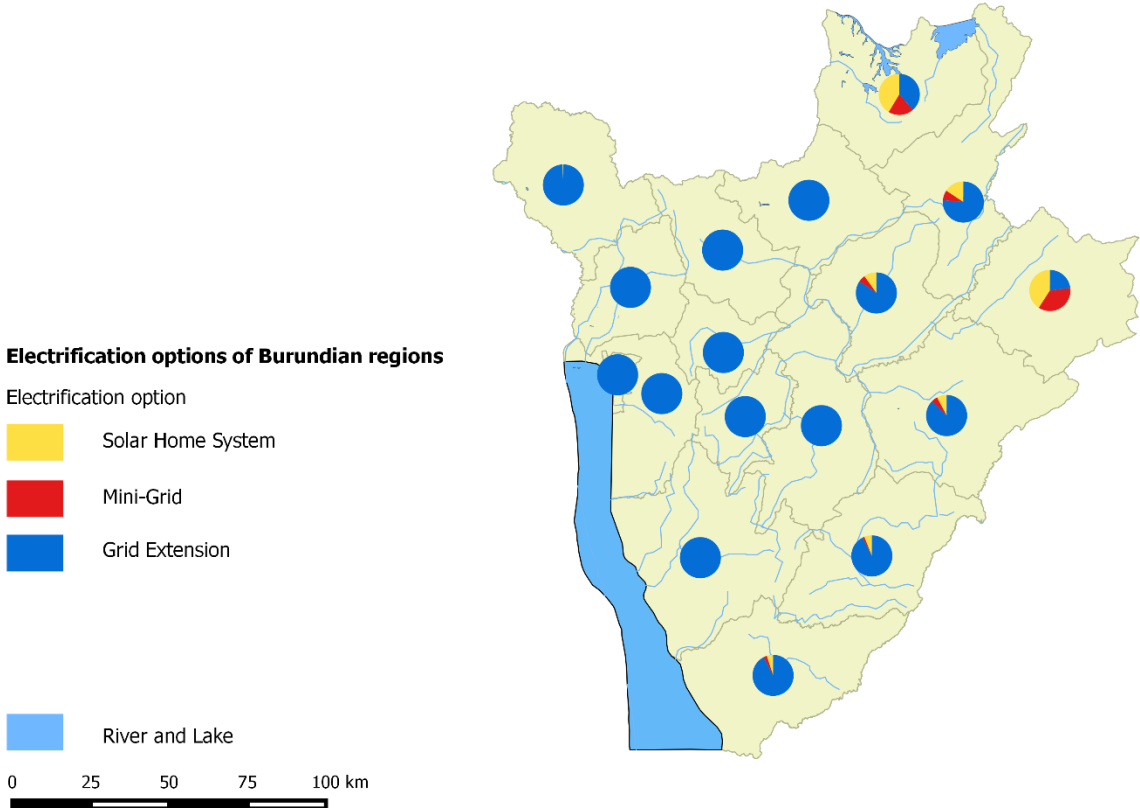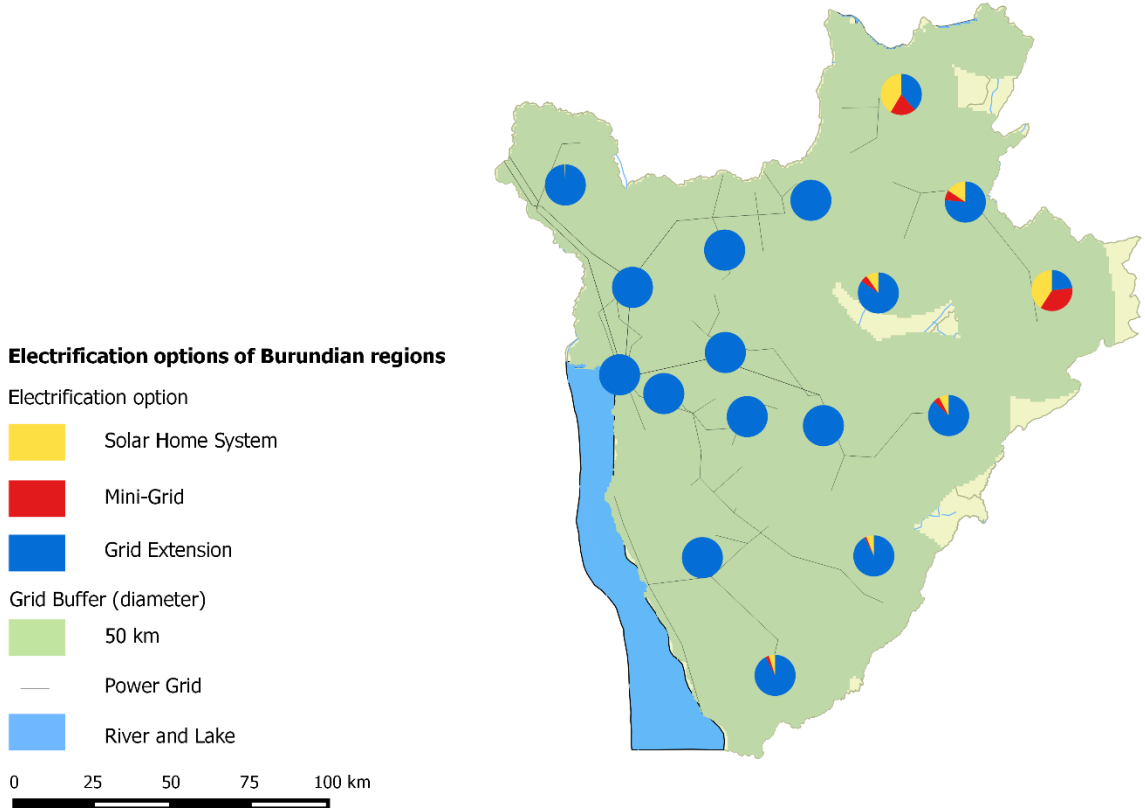

# Electrification option in all Burundian regions: GridBuilt-SHSDom

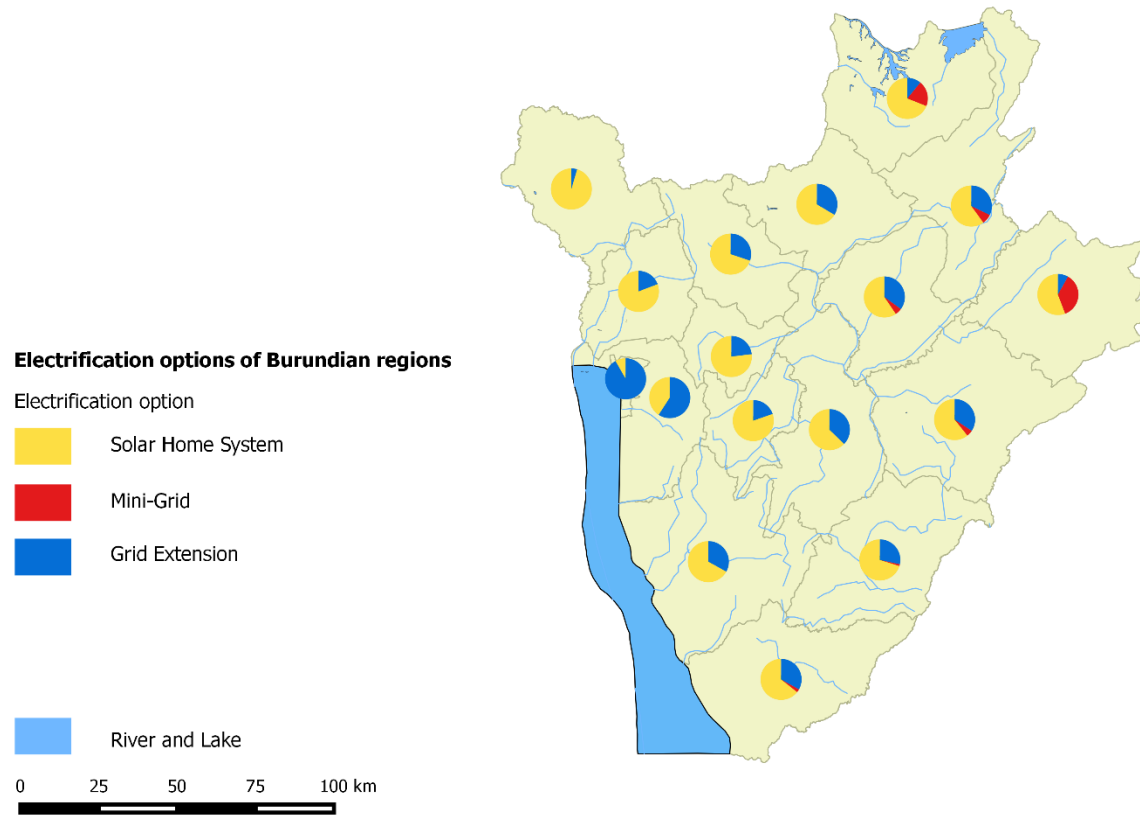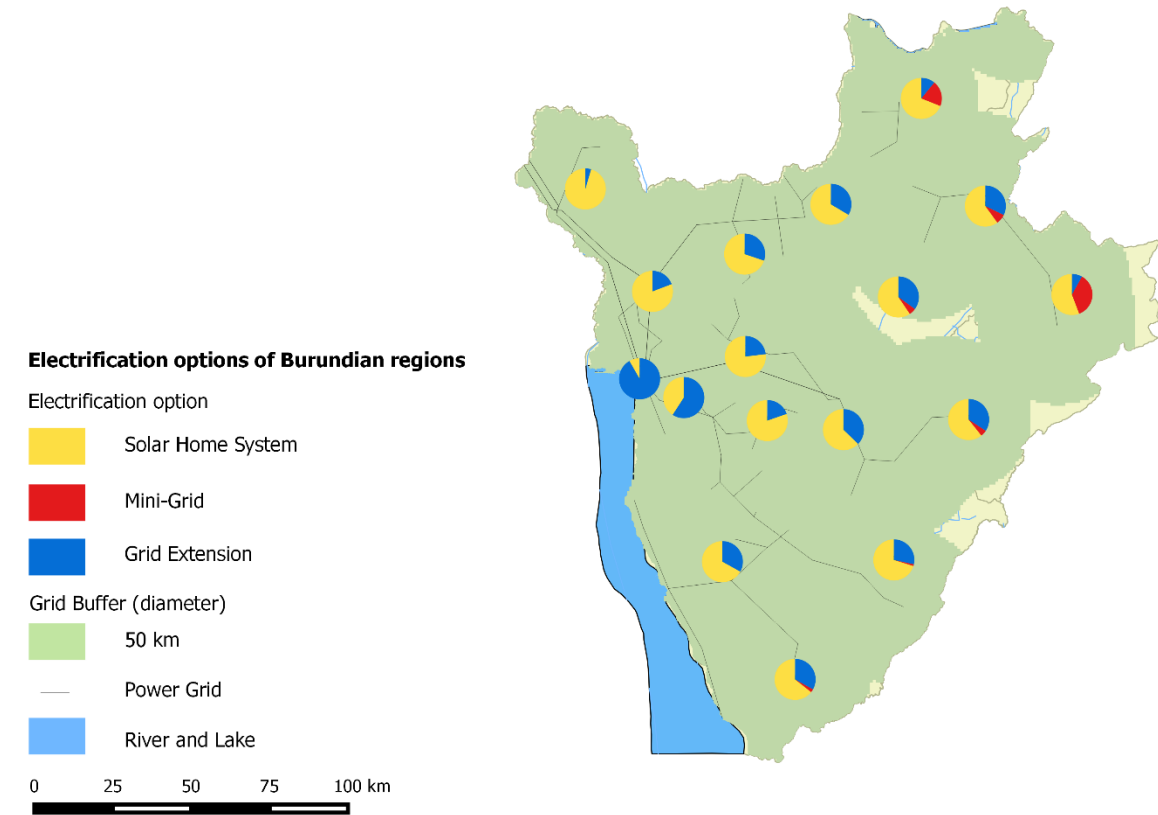

# Electrification option: GridBuilt-SHSDom

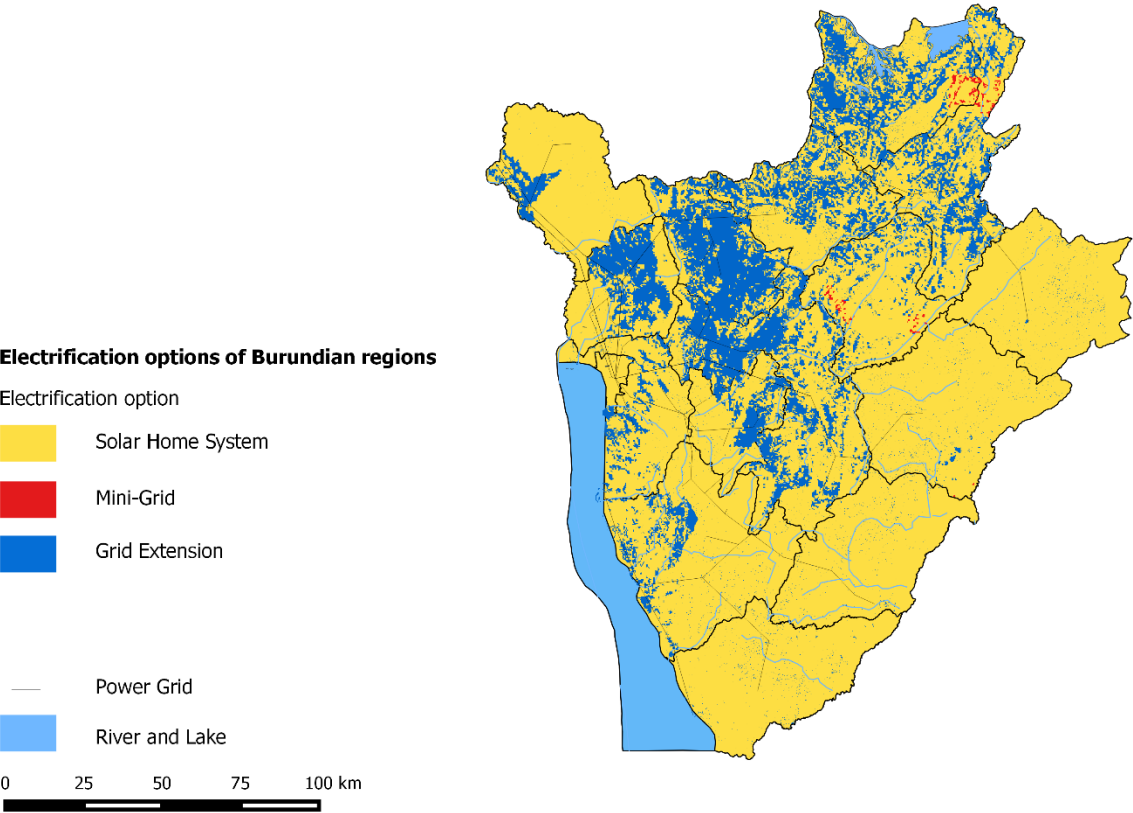

# Electrification option: GridBuilt-GridDom

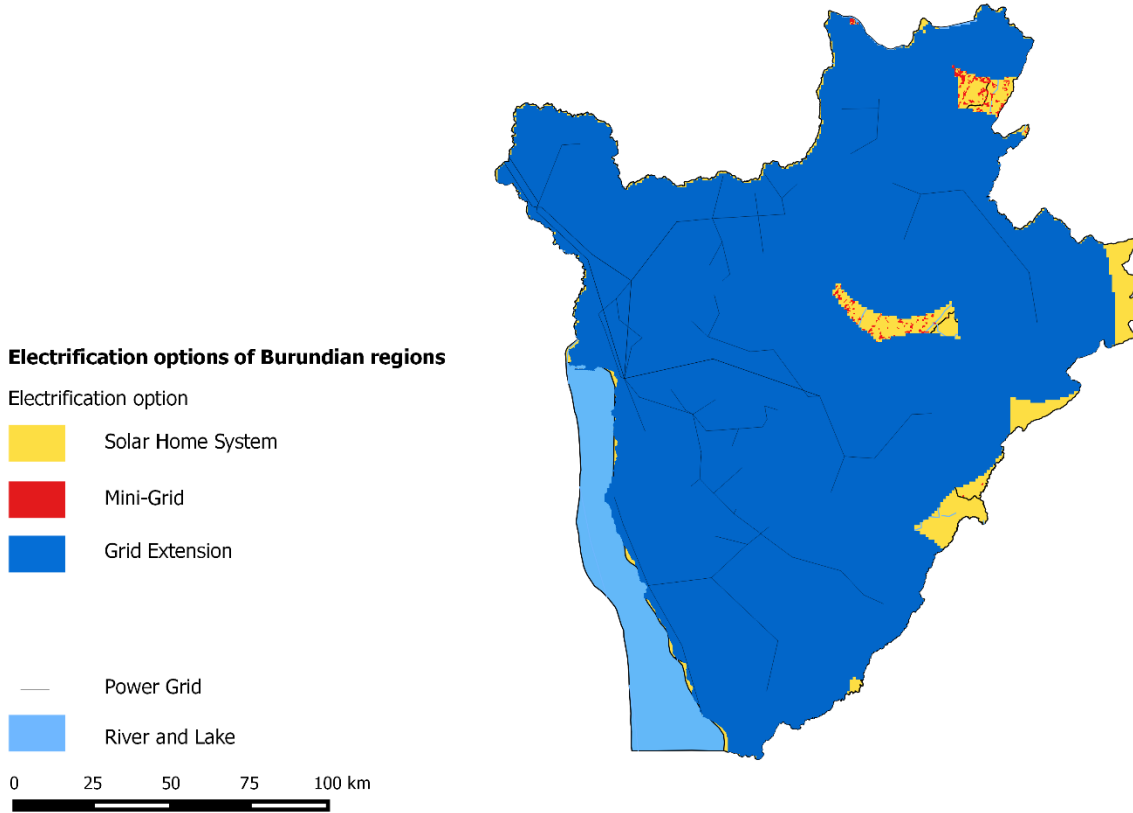

Share of electrification options in all Burundian regions

SHS (%) Mini-Grid (%) Grid (%)

GridBuilt-GridDom

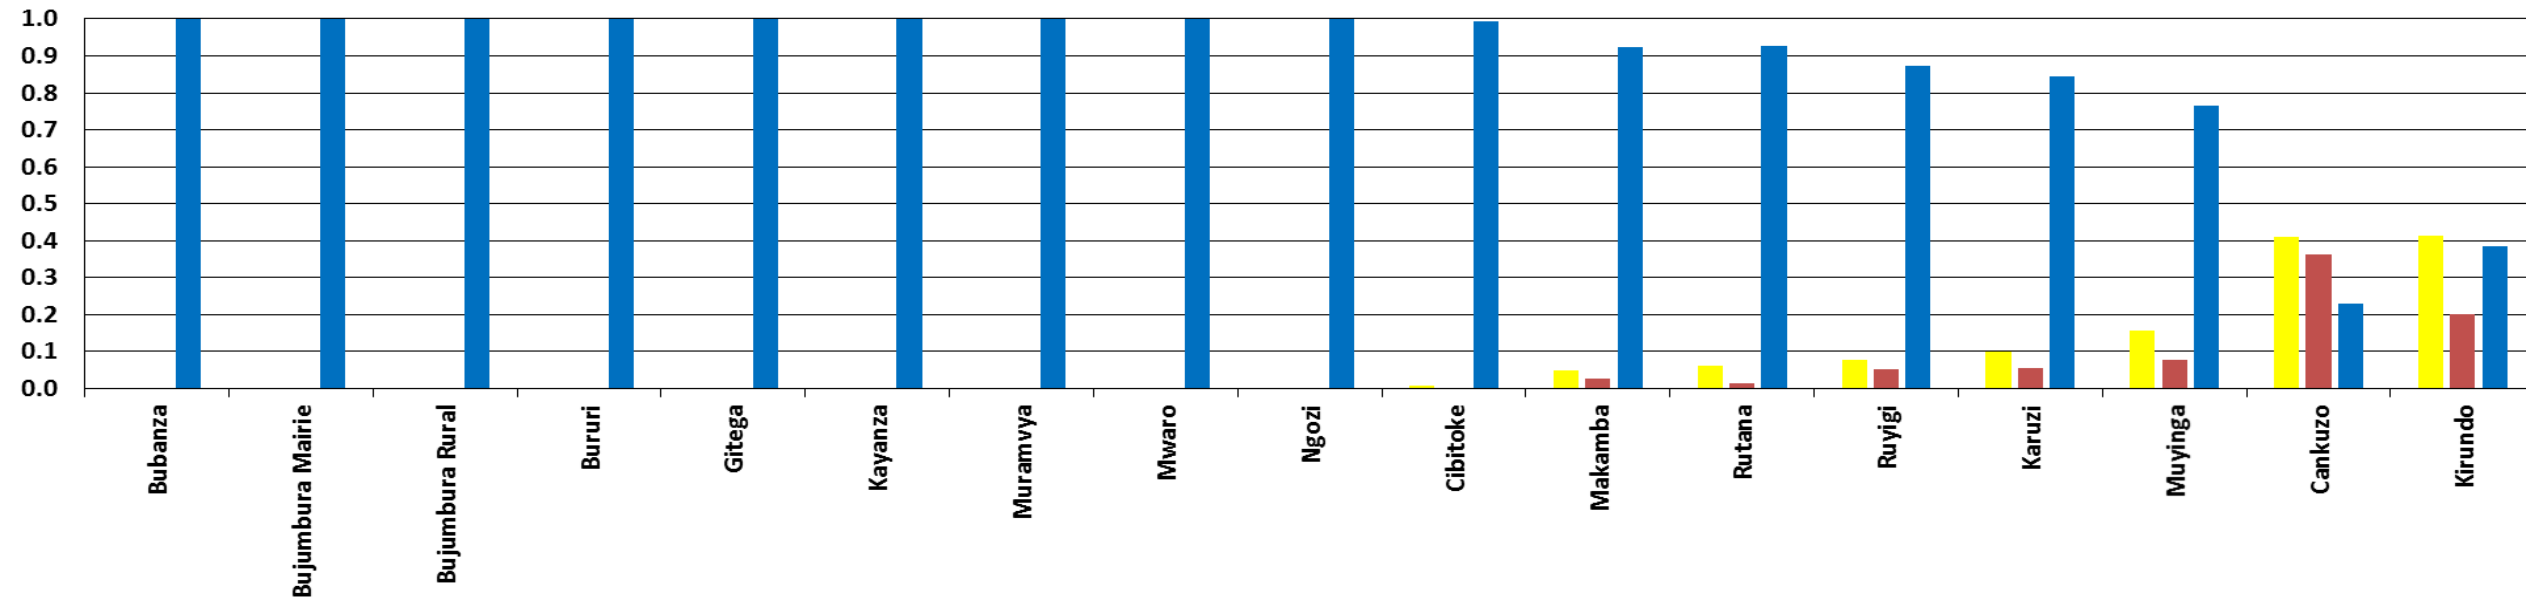

Share of electrification options in all Burundian regions

SHS (%) Mini-Grid (%) Grid (%)

GridBuilt-SHSDom

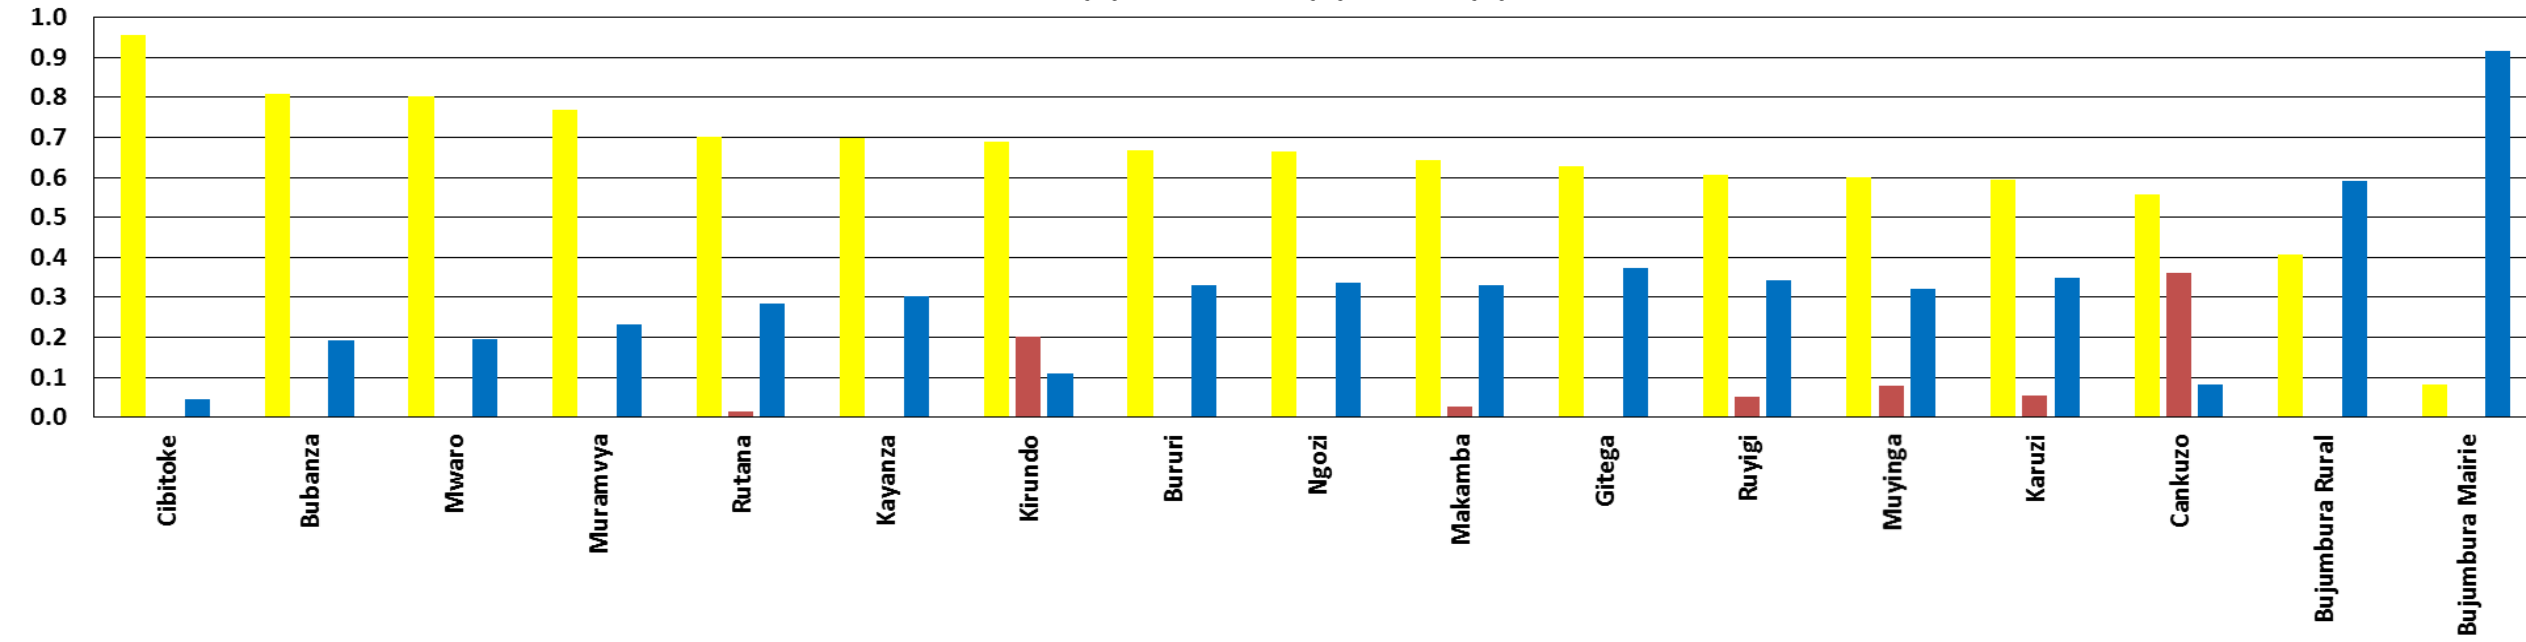

# Electrification option in all Burundian regions: GridPlanned-GridDom

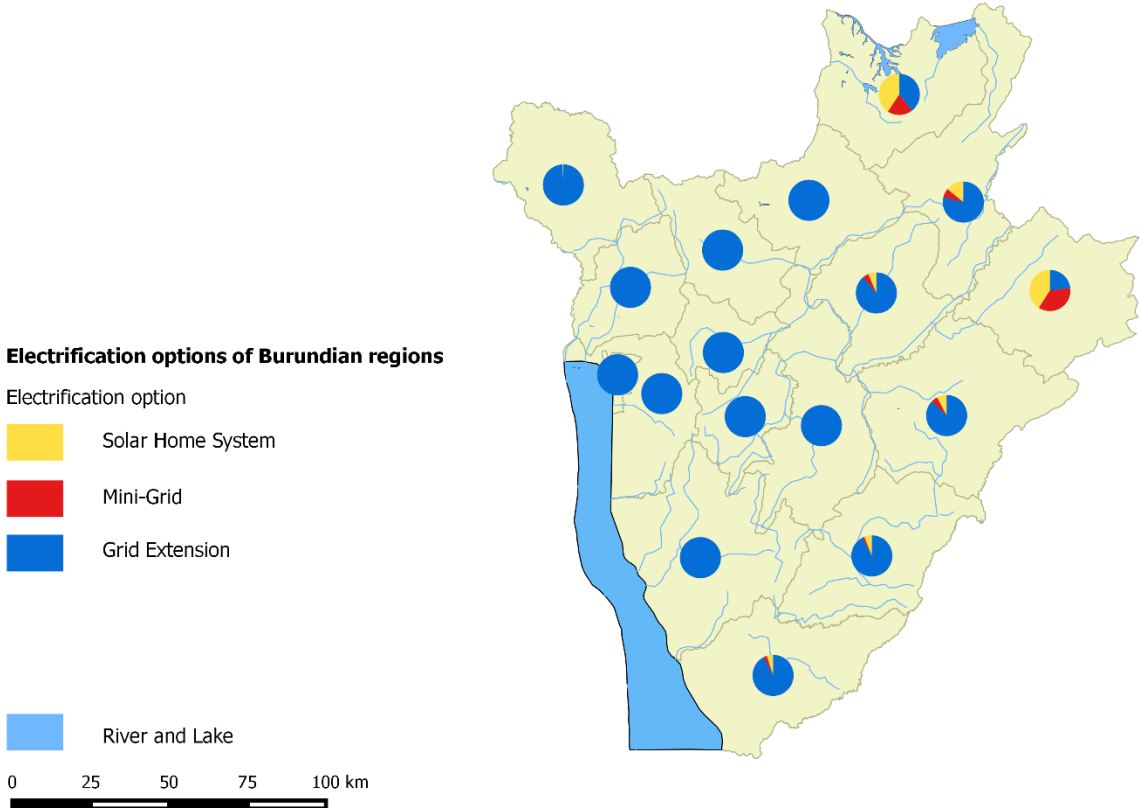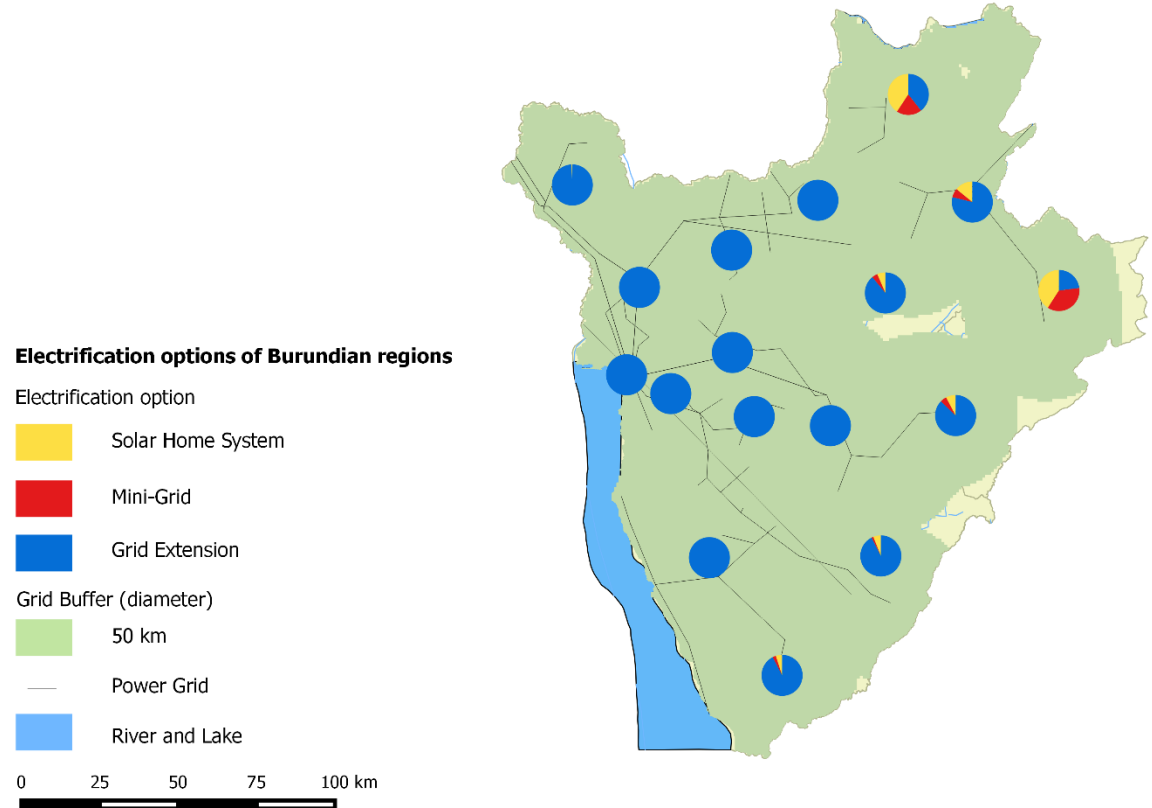

# Electrification option in all Burundian regions: GridPlanned-SHSDom

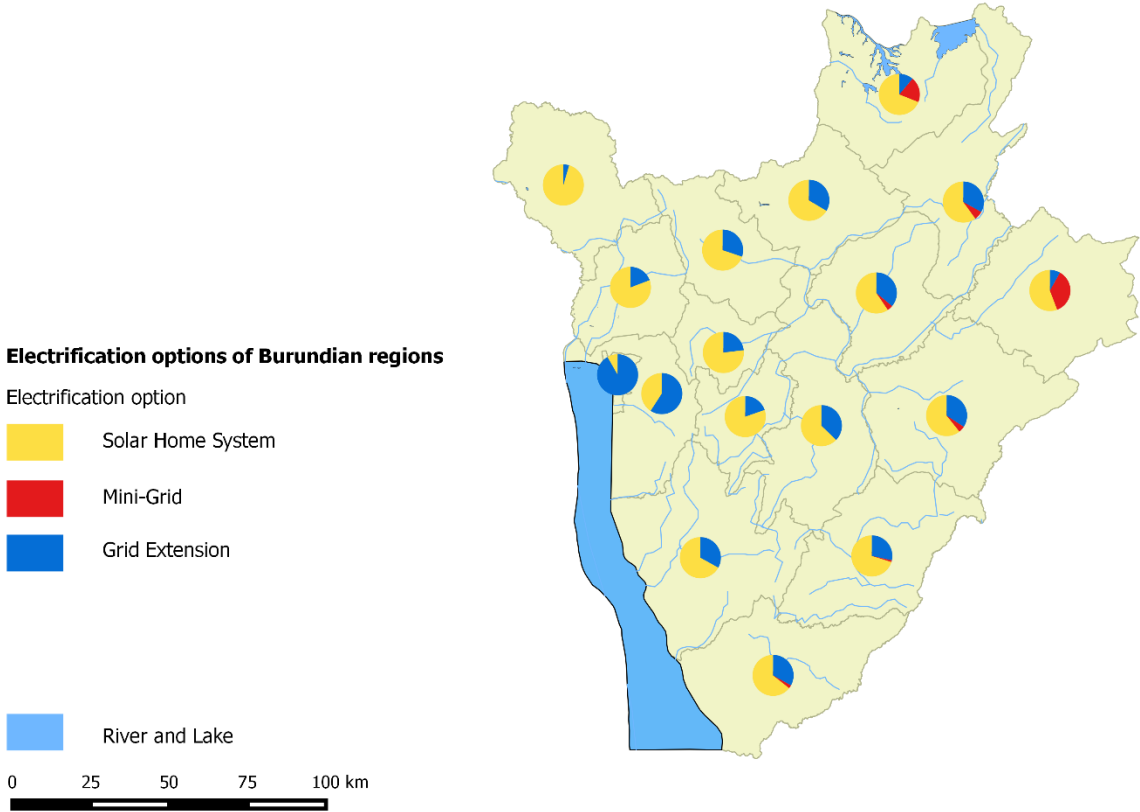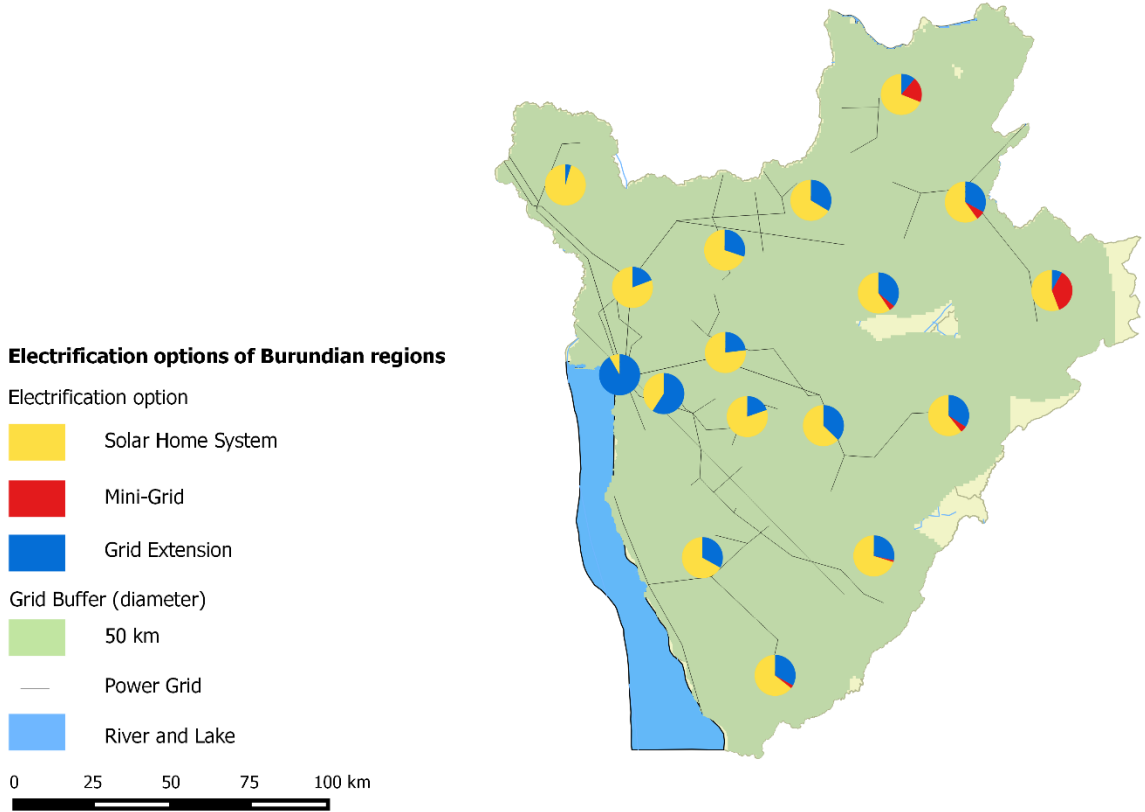

# Electrification option: GridPlanned-SHSDom

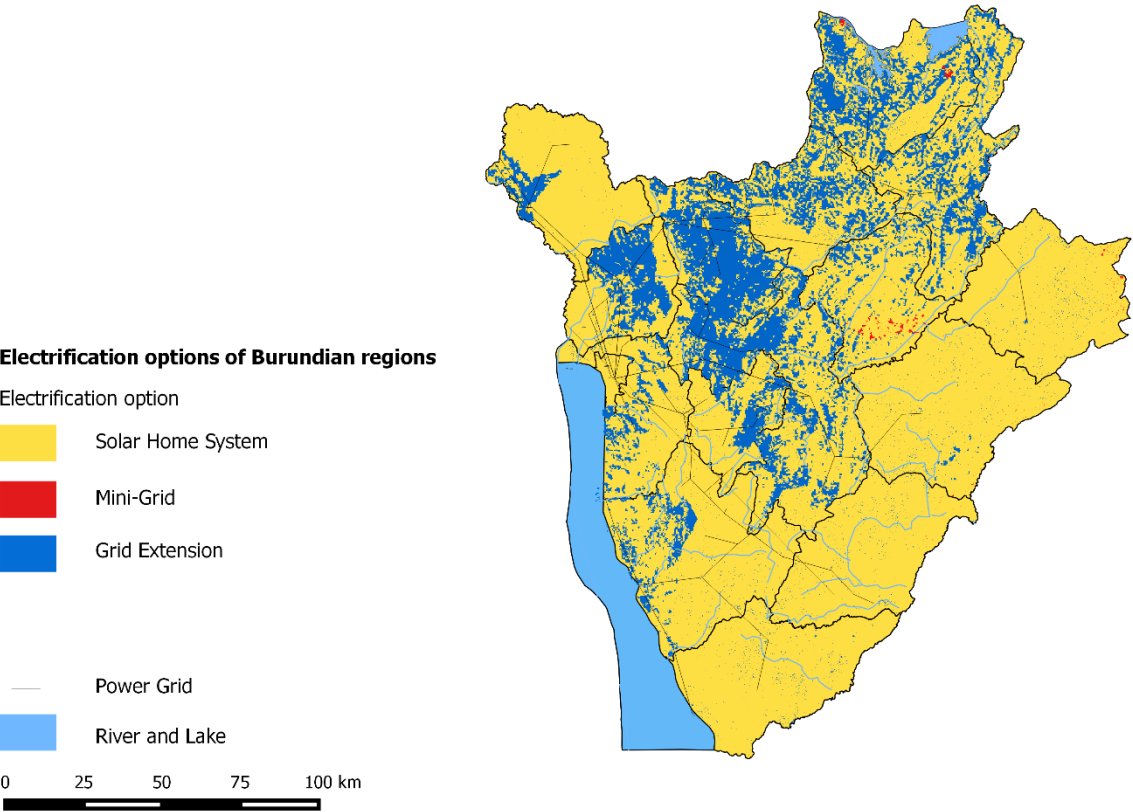

# Electrification option: GridPlanned-GridDom

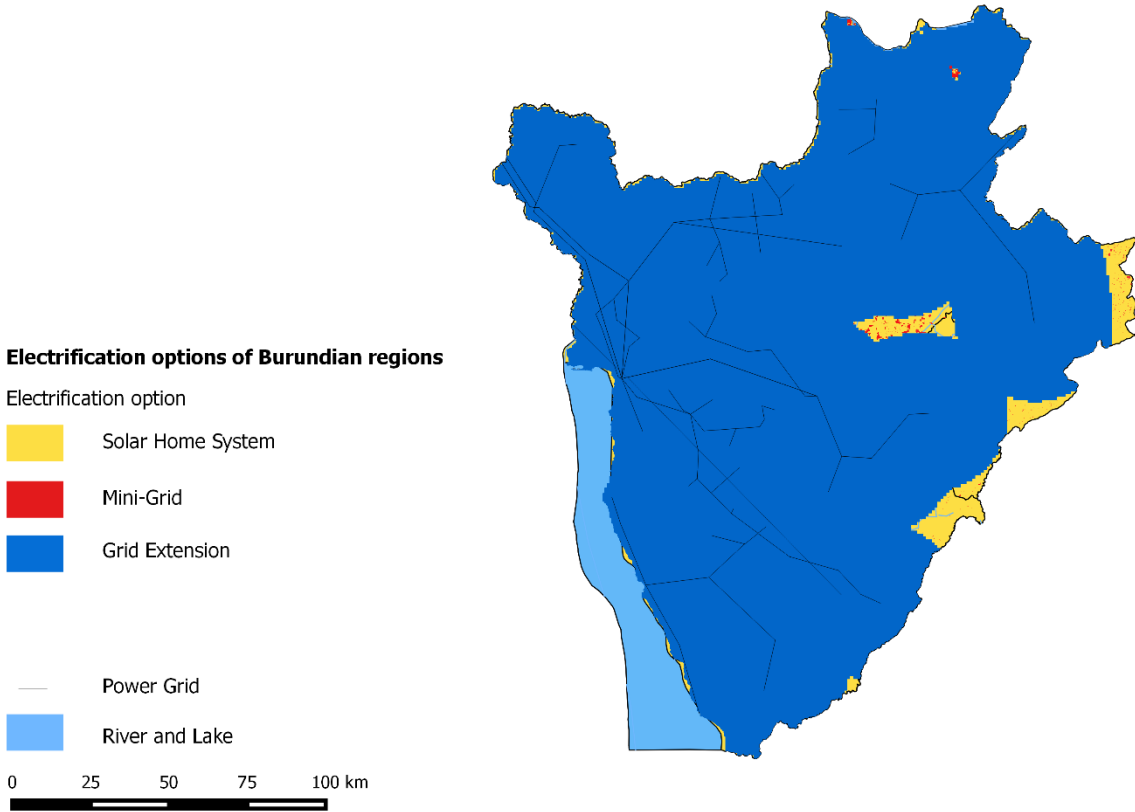

Share of electrification options in all Burundian regions

GridPlanned-GridDom

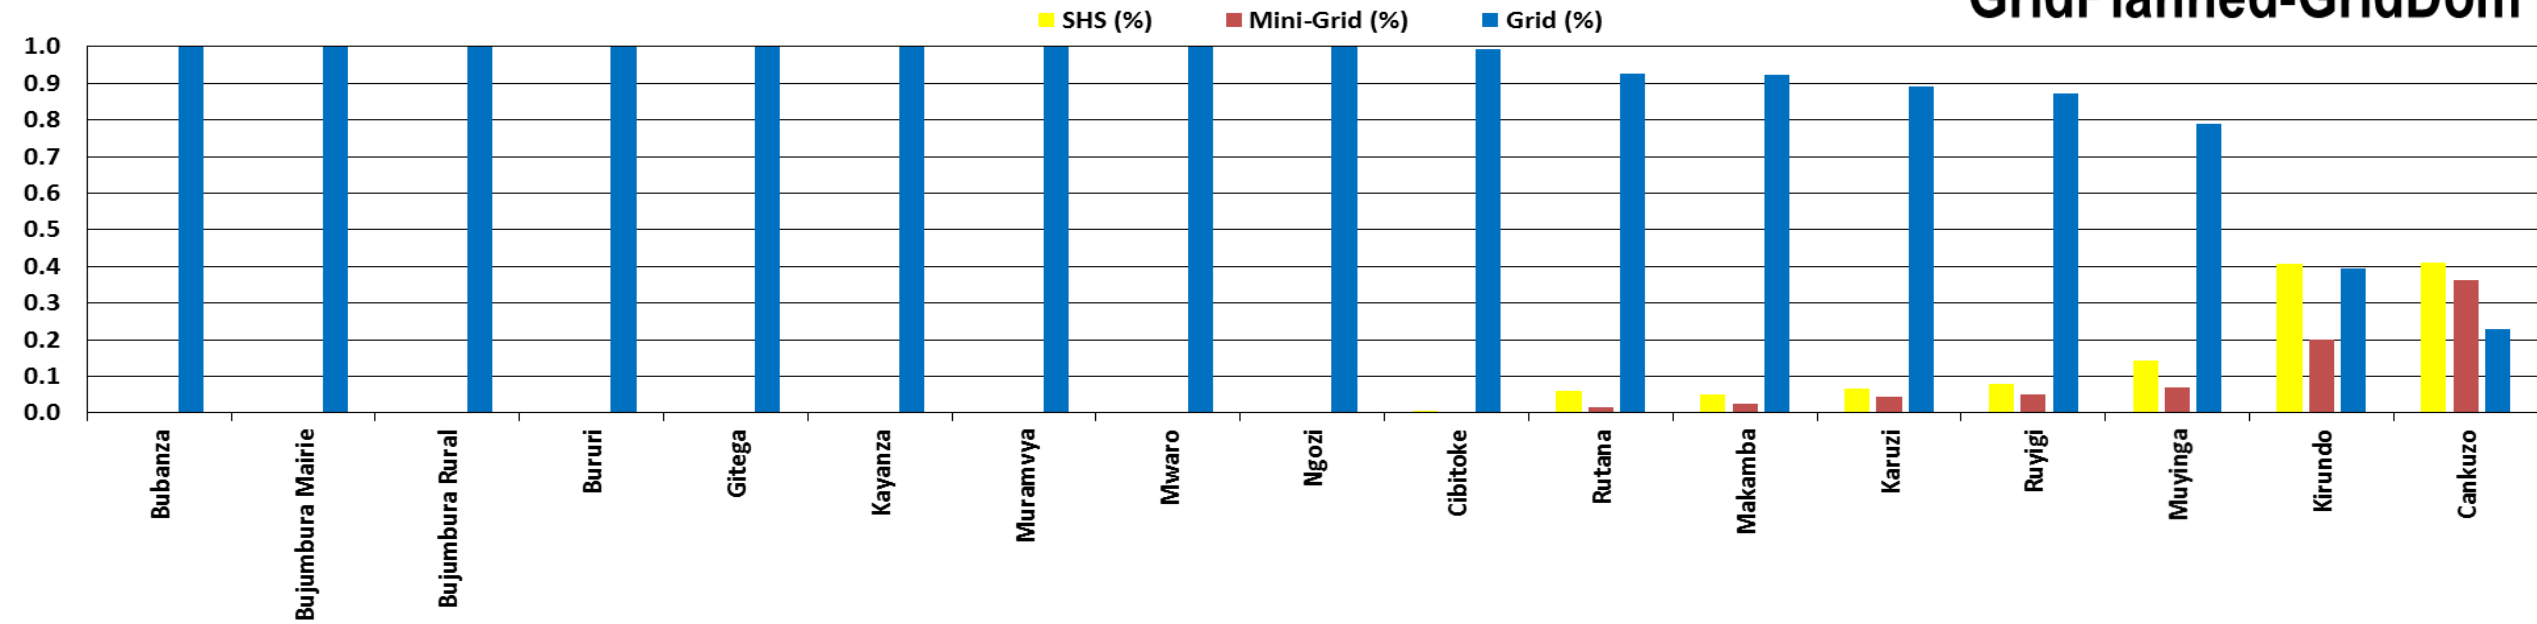

Share of electrification options in all Burundian regions

GridPlanned-SHSDom

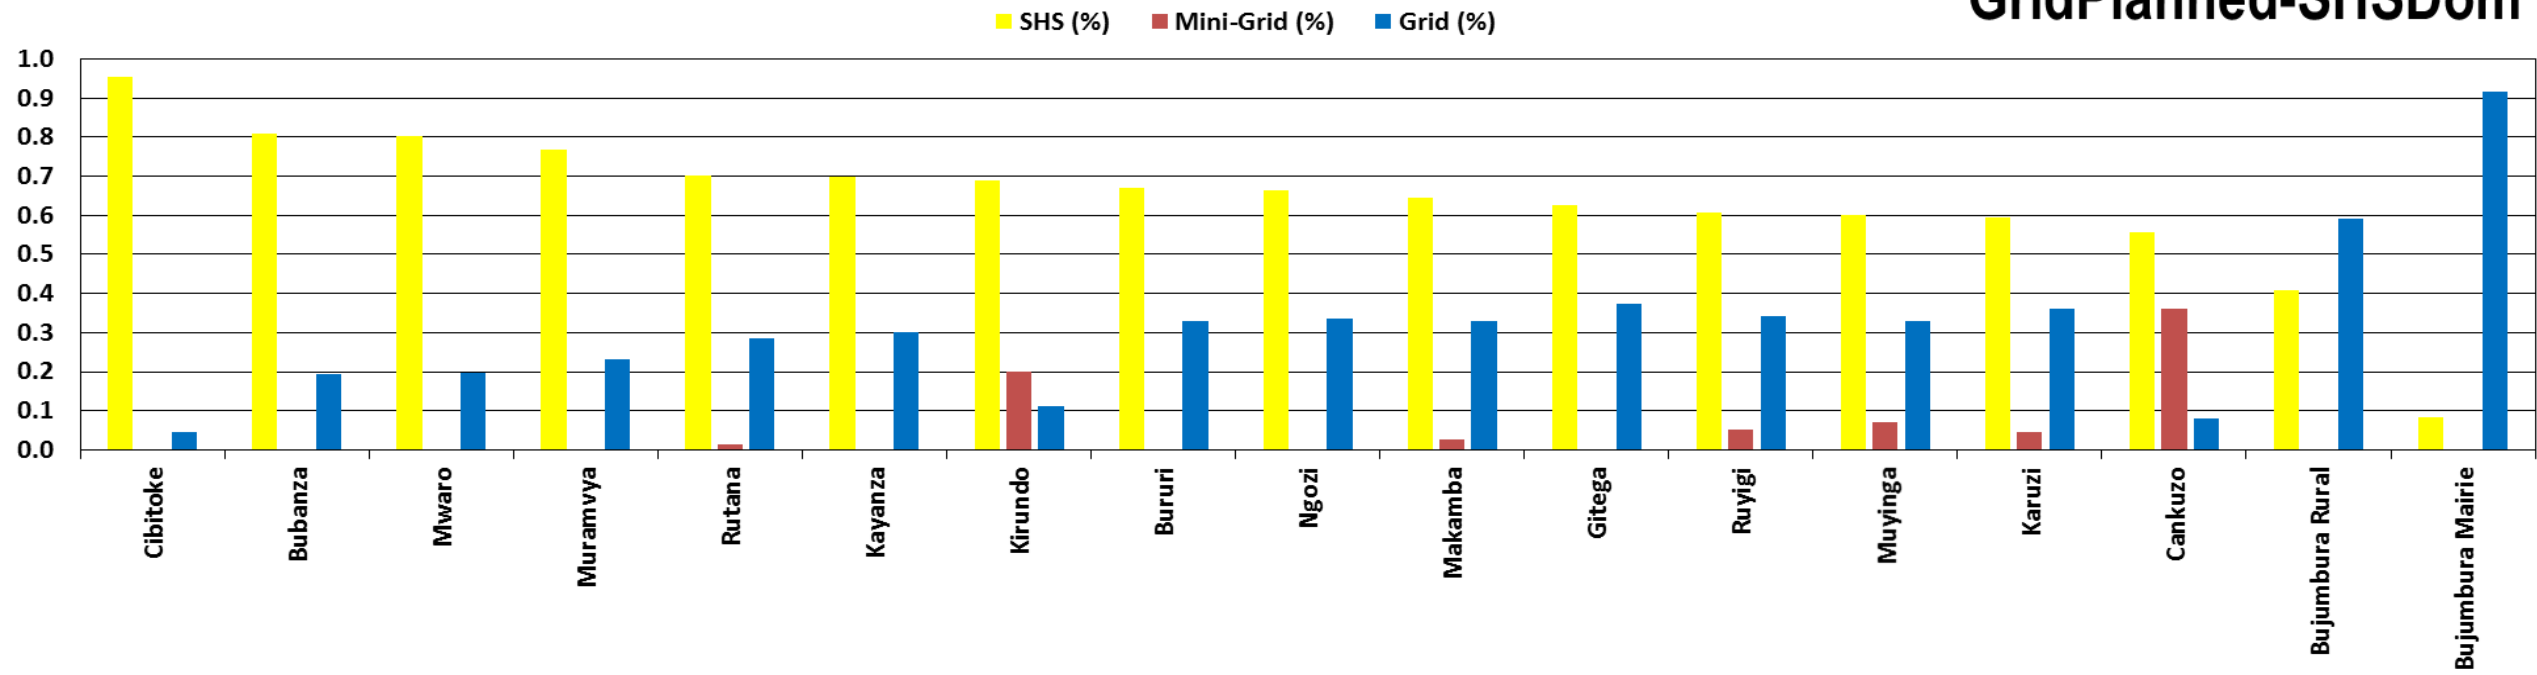

# Djibouti

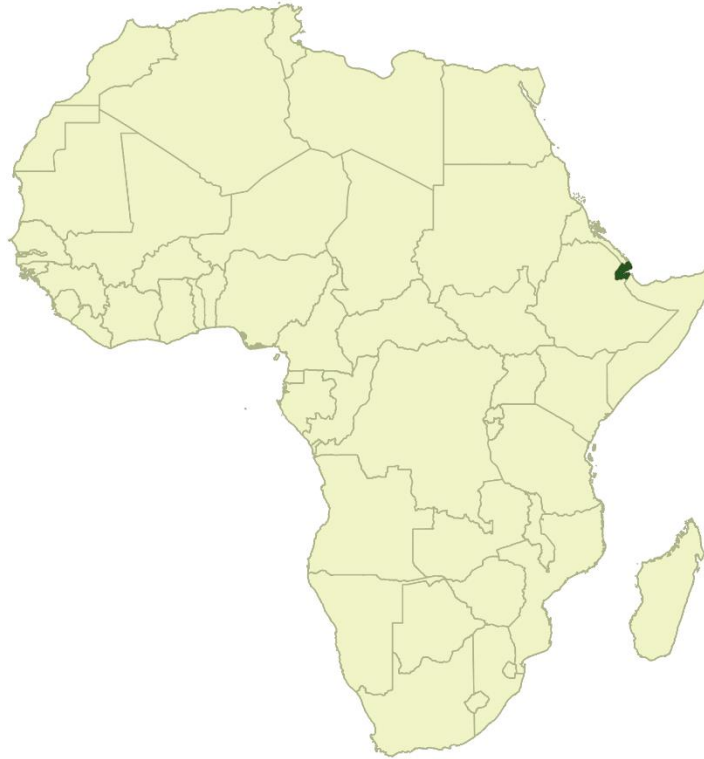

# Night light emission and Population of Djiboutian regions

## Night light emission in Djibouti

Detected night lights

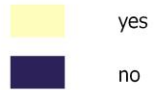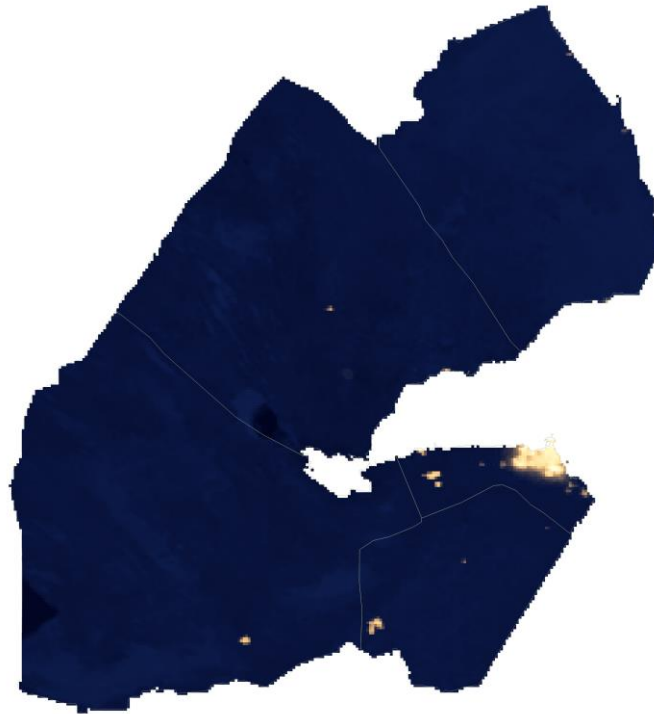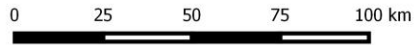

## Population structure of Djibouti

Population density (people/750x750m<sup>2</sup>)

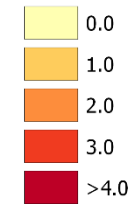

River and Lake (blue)

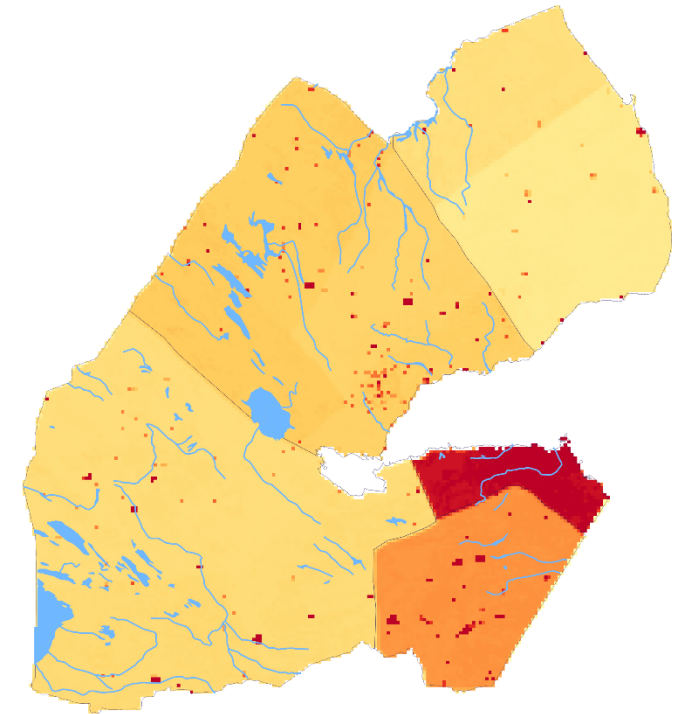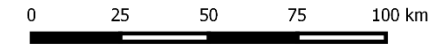

# Electrification option in all Djiboutian regions: GridBuilt-GridDom

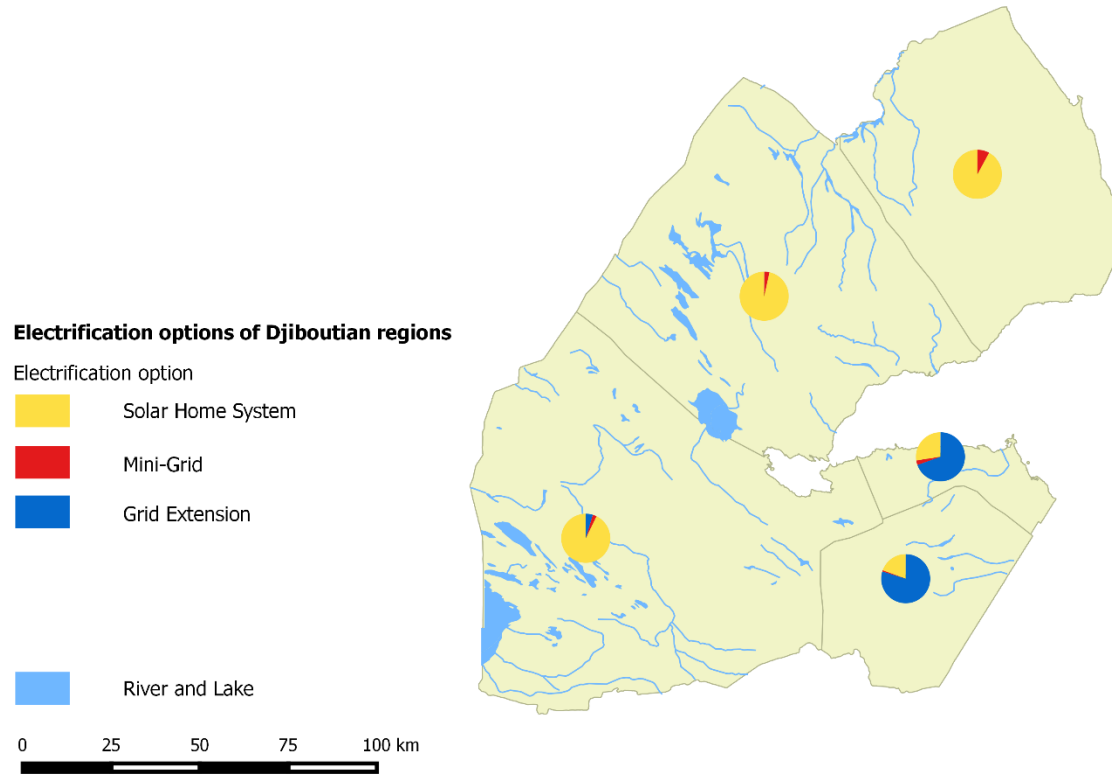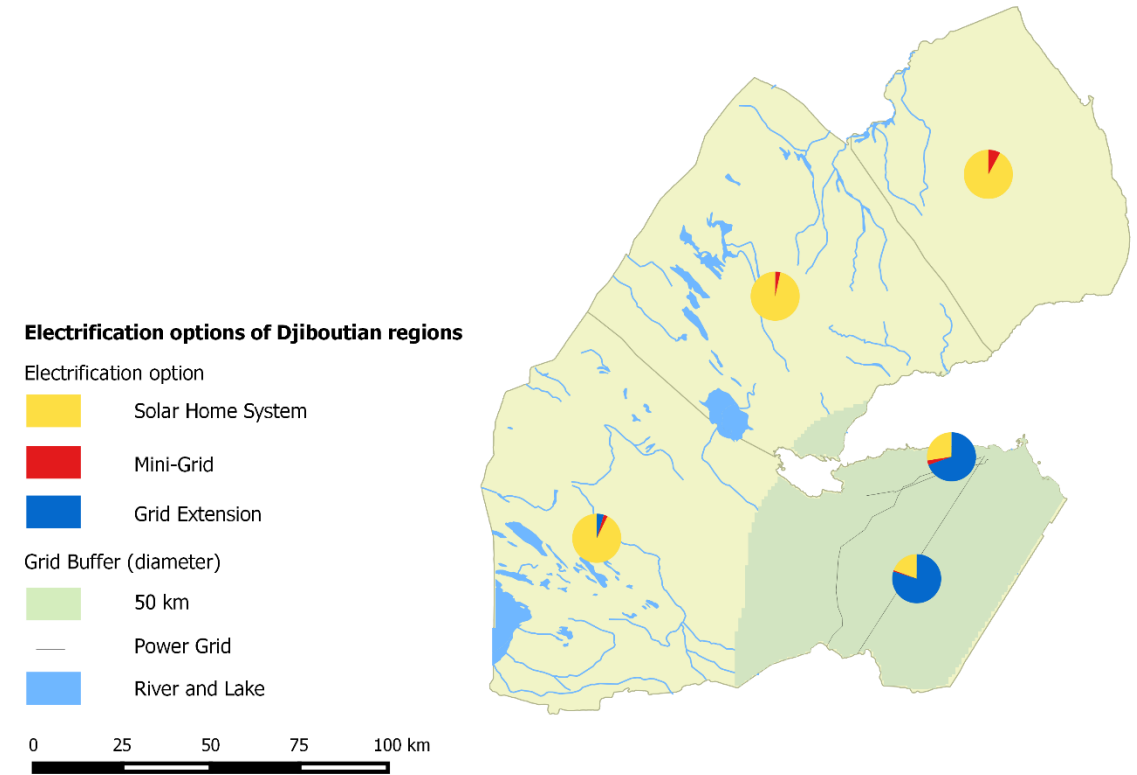

# Electrification option in all Djiboutian regions: GridBuilt-SHSDom

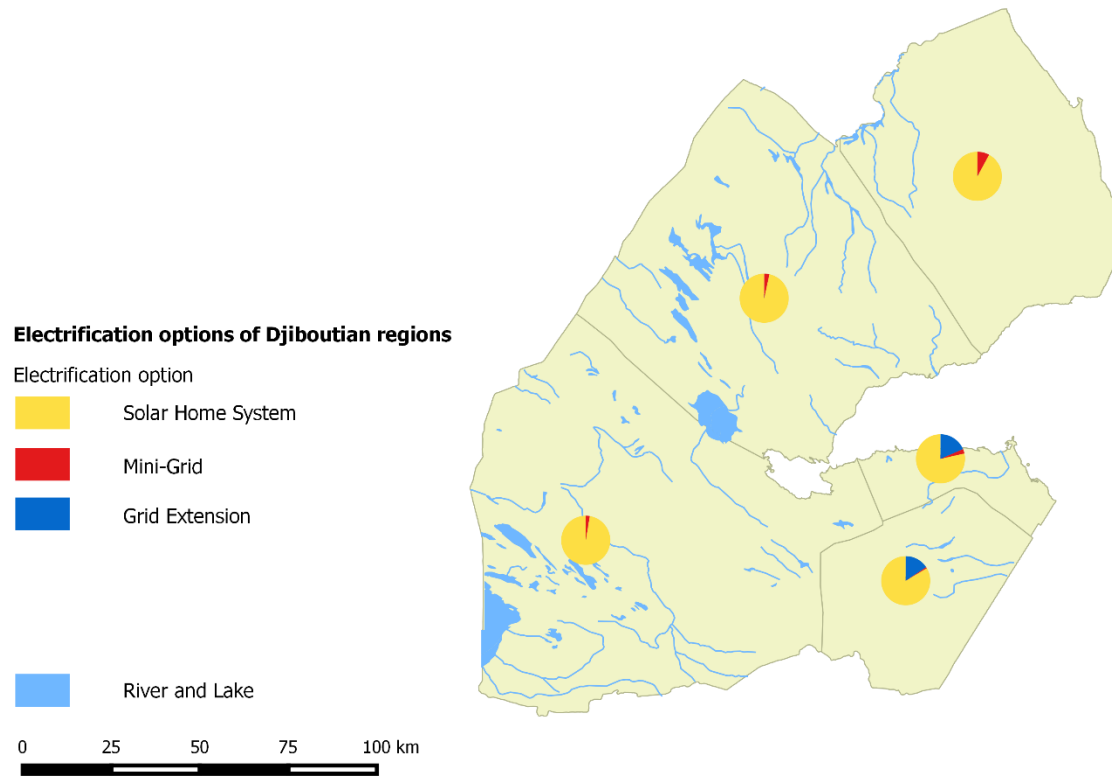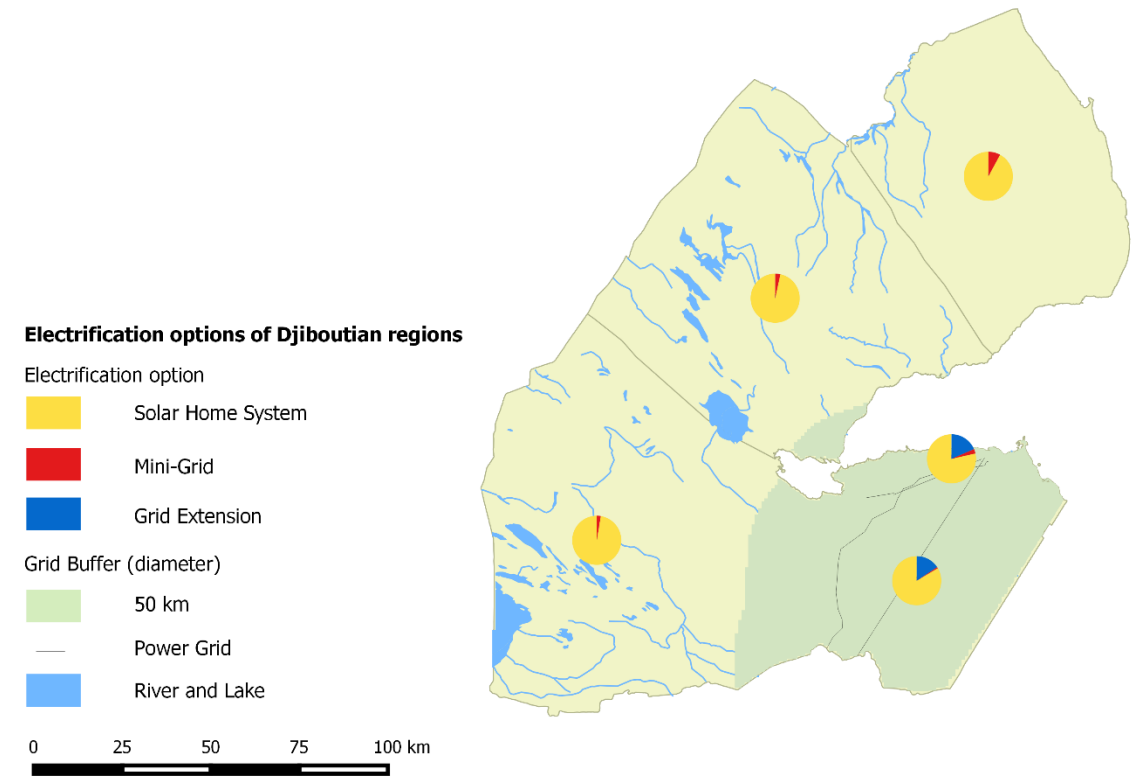

# Electrification option: GridBuilt-SHSDom

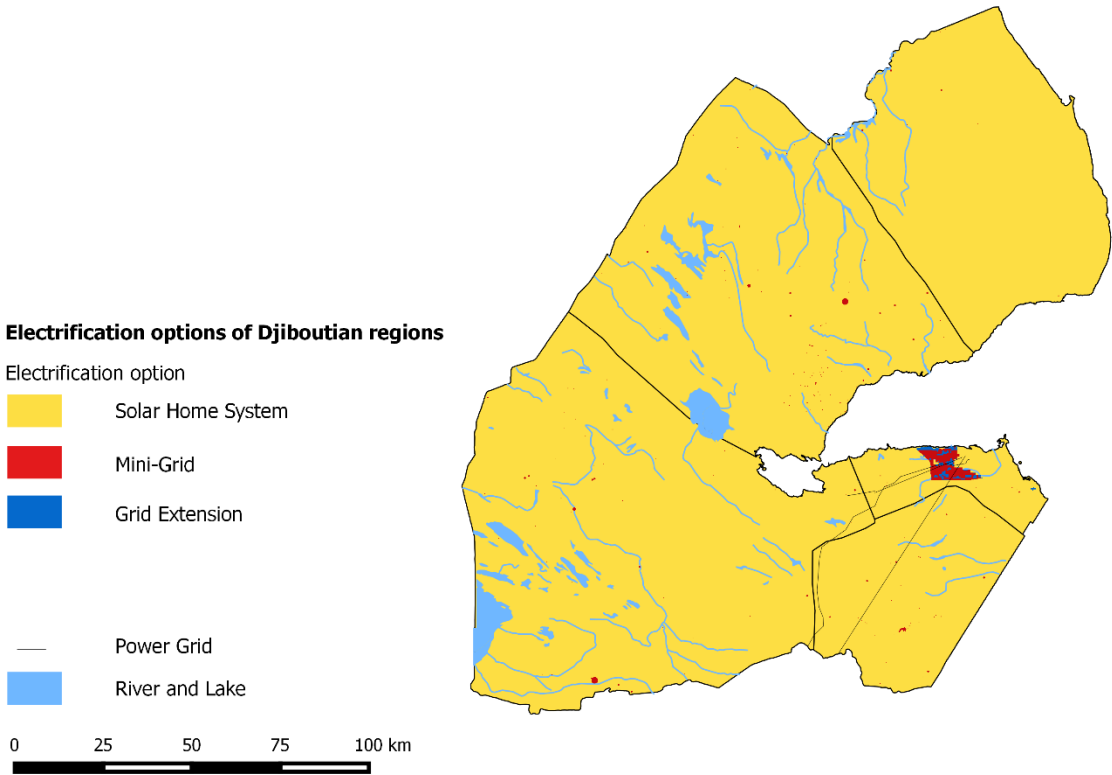

# Electrification option: GridBuilt-GridDom

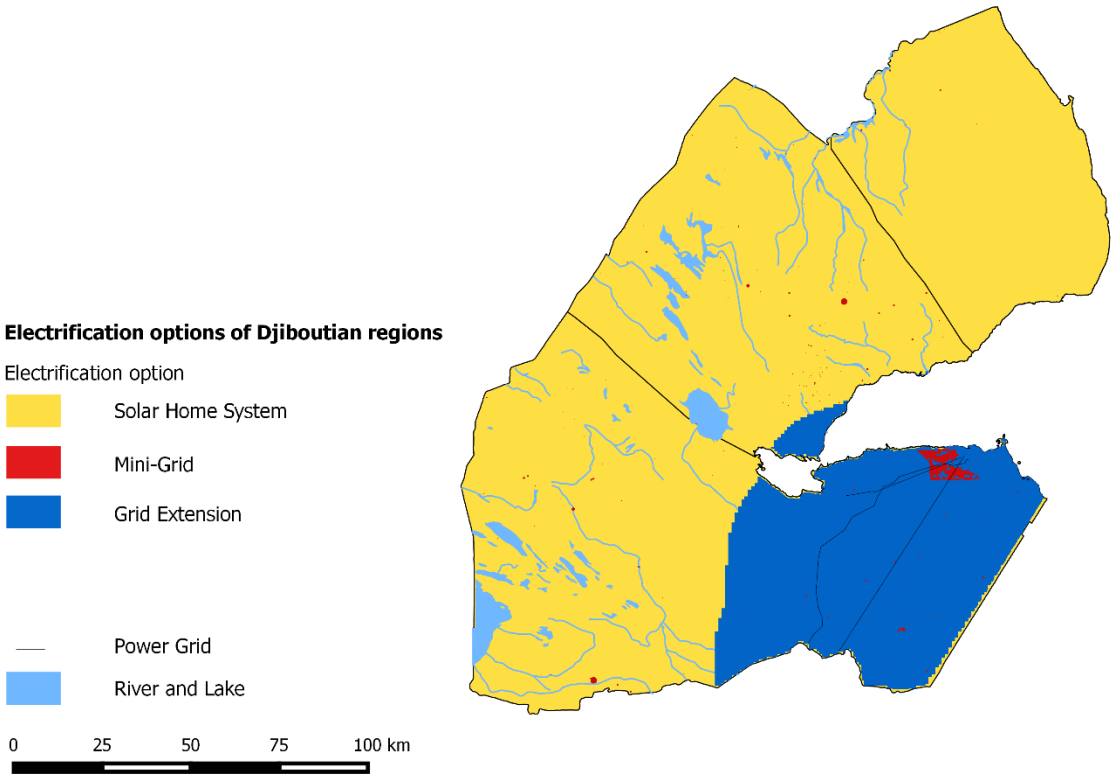

Share of electrification options in all Djiboutian regions

SHS (%) Mini-Grid (%) Grid (%)

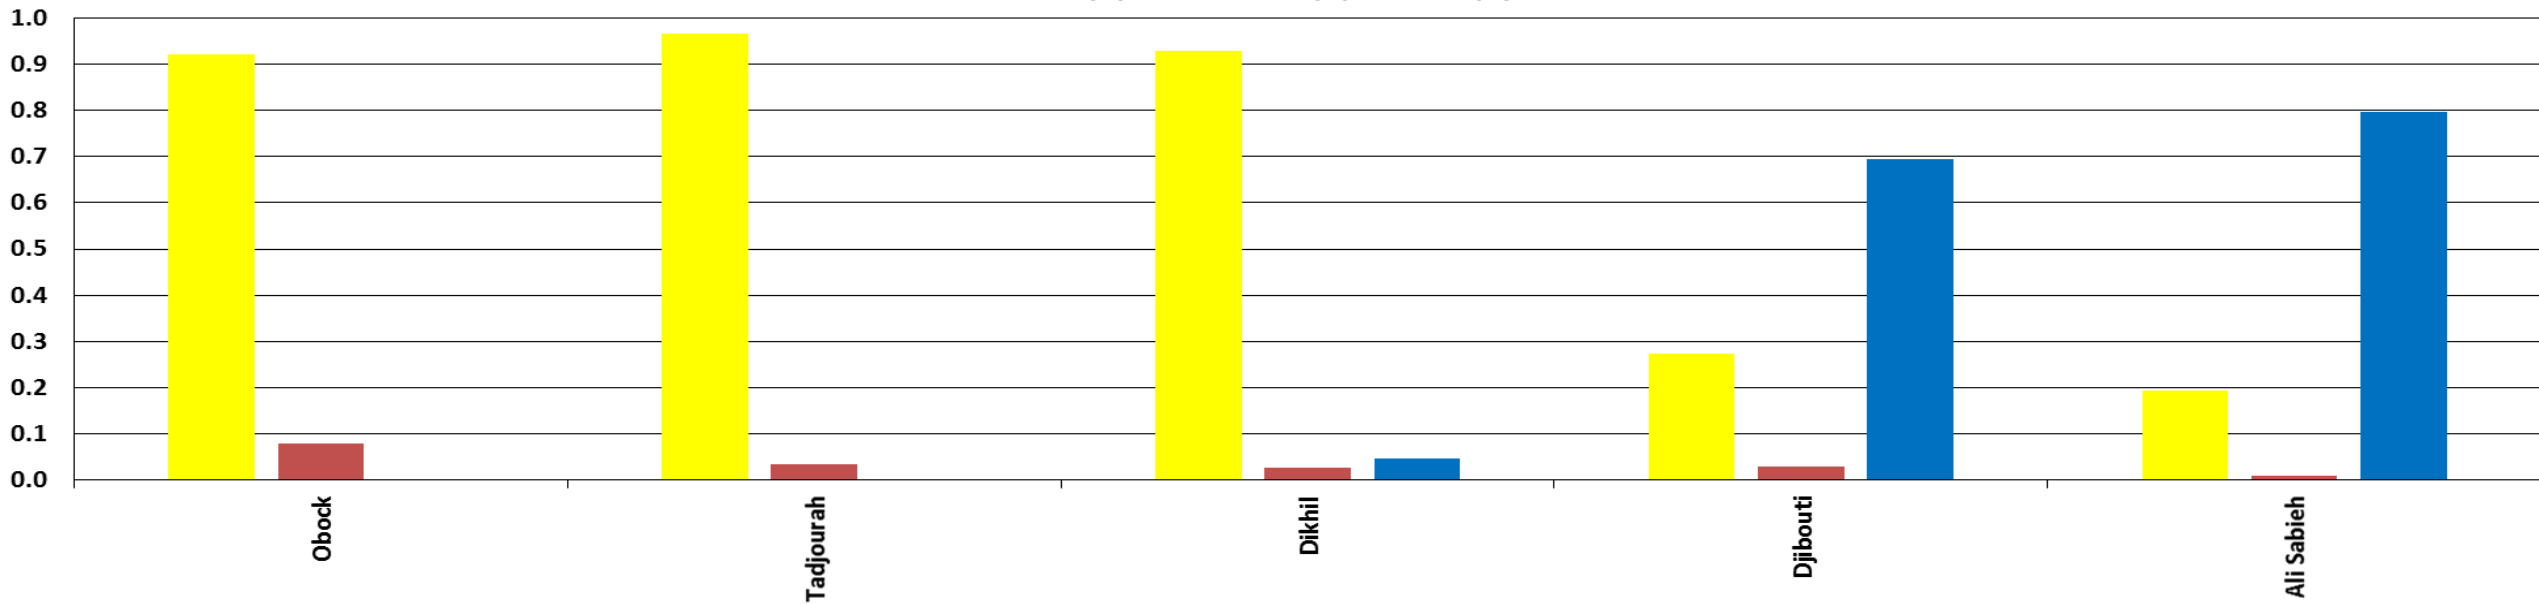

Share of electrification options in all Djiboutian regions

SHS (%) Mini-Grid (%) Grid (%)

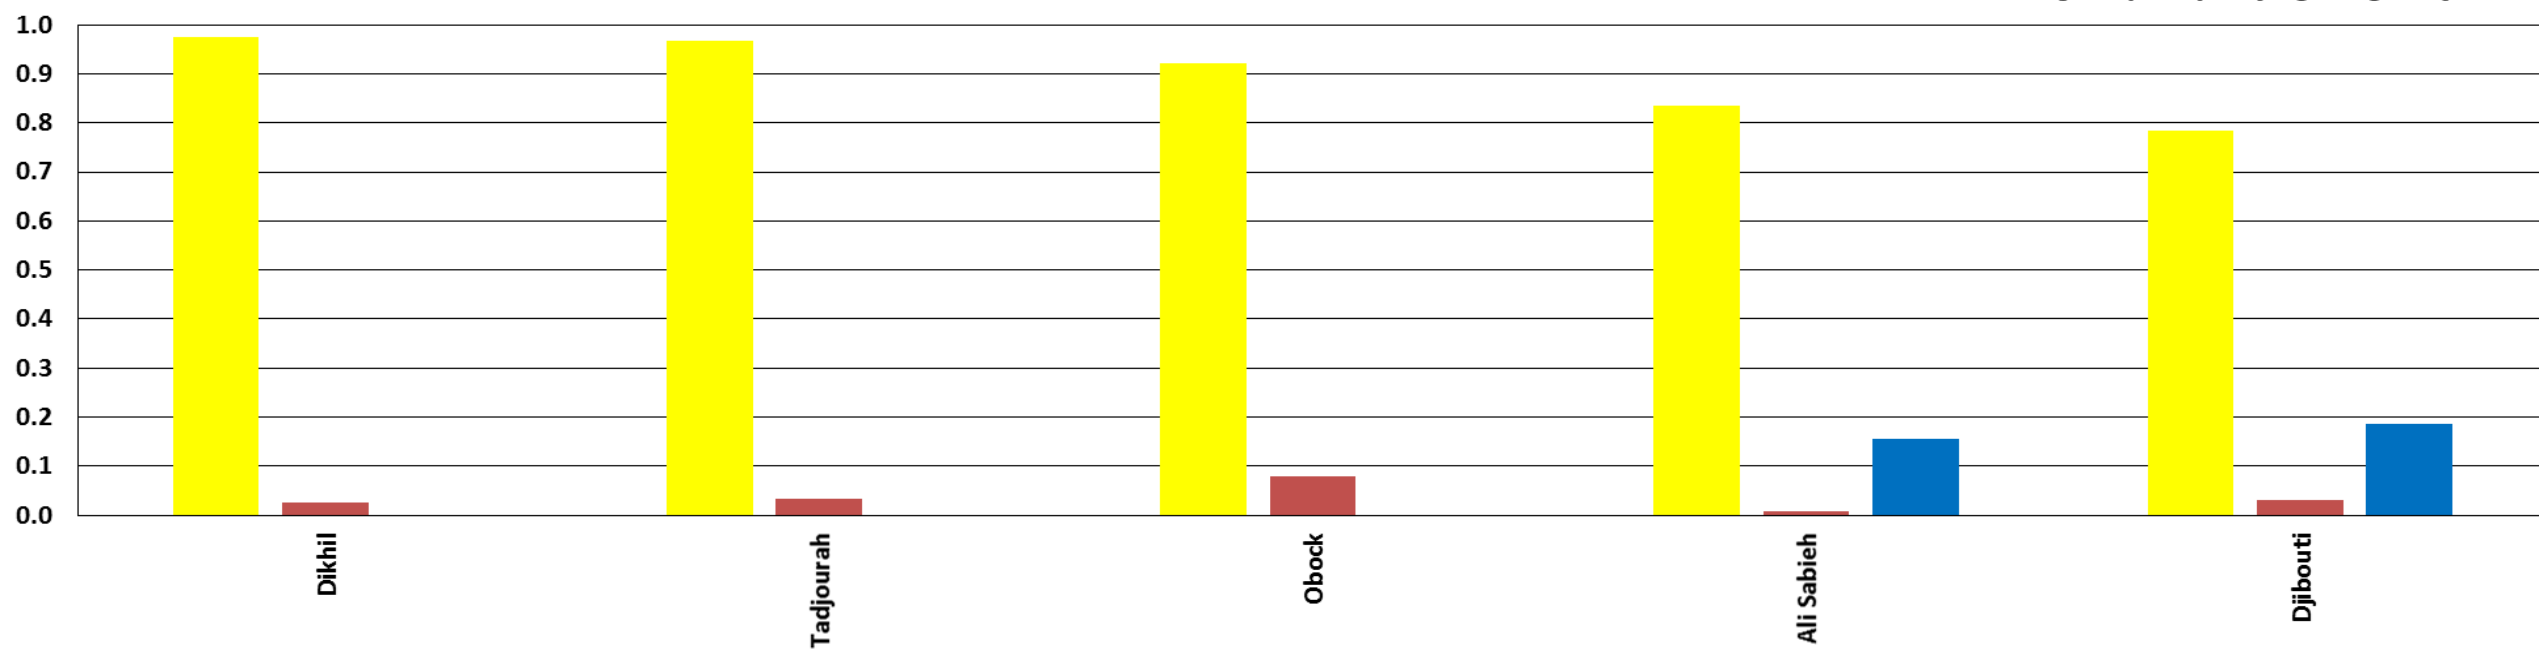

# Electrification option in all Djiboutian regions: GridPlanned-GridDom

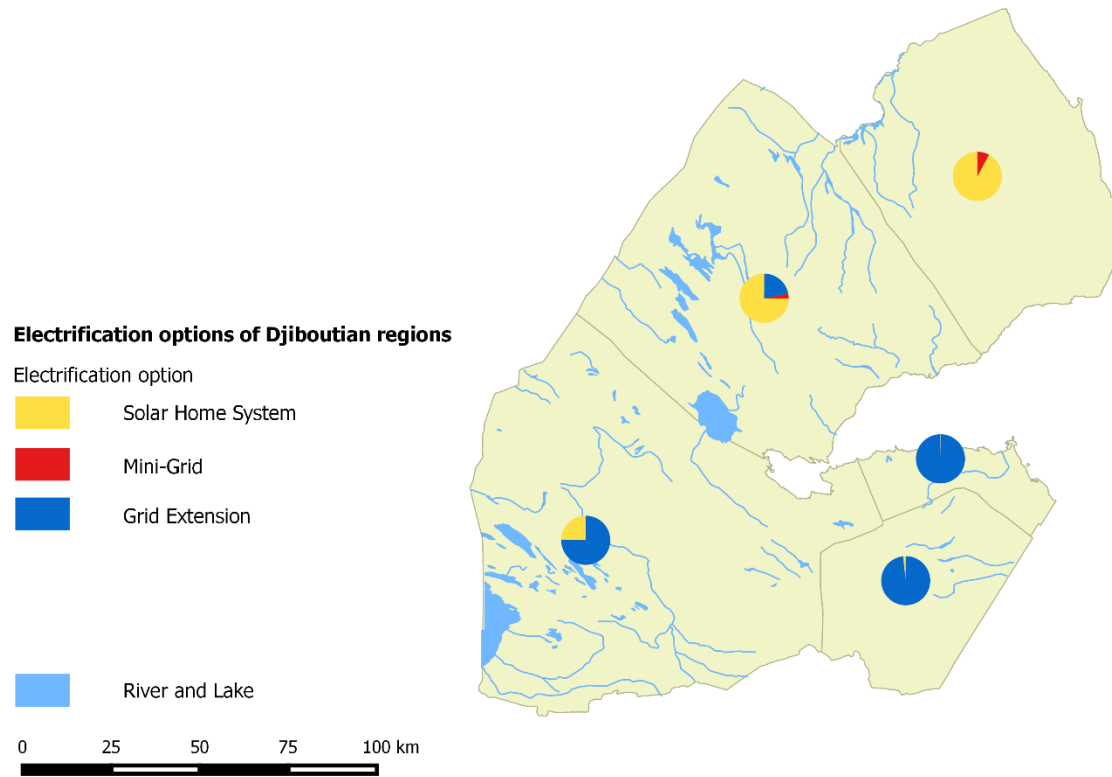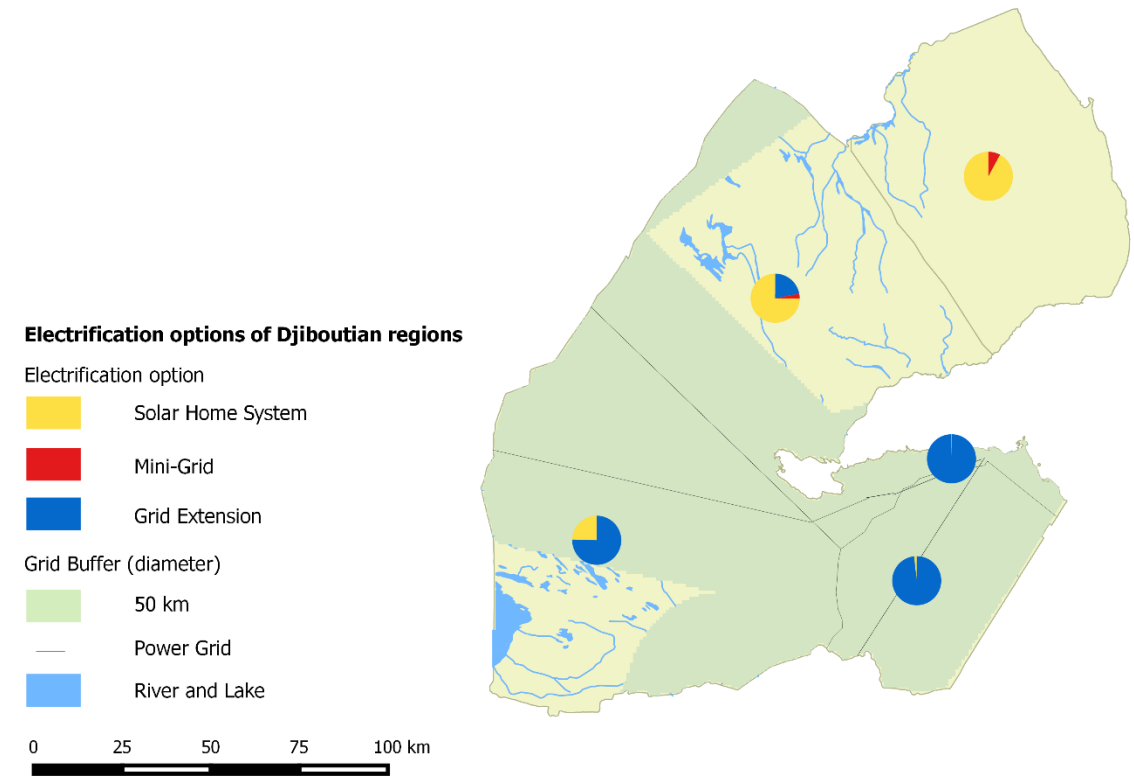

# Electrification option in all Djiboutian regions: GridPlanned-SHSDom

## Electrification options of Djiboutian regions

Electrification option

 Solar Home System

 Mini-Grid

 Grid Extension

 River and Lake

0 25 50 75 100 km

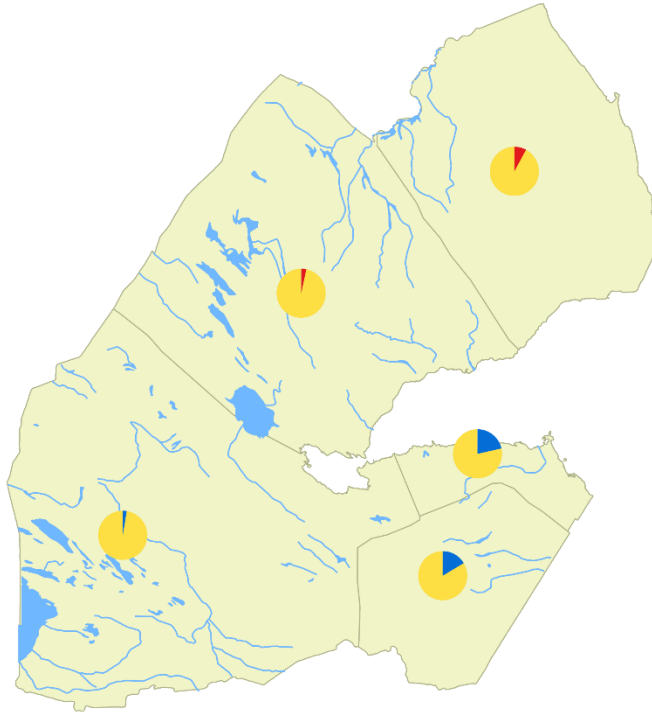

## Electrification options of Djiboutian regions

Electrification option

 Solar Home System

 Mini-Grid

 Grid Extension

Grid Buffer (diameter)

 50 km

 Power Grid

 River and Lake

0 25 50 75 100 km

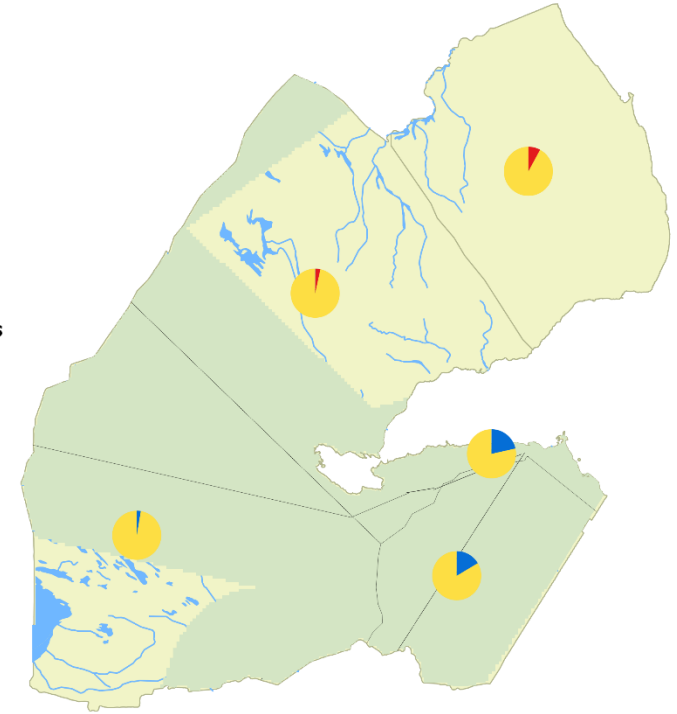

# Electrification option: GridPlanned-SHSDom

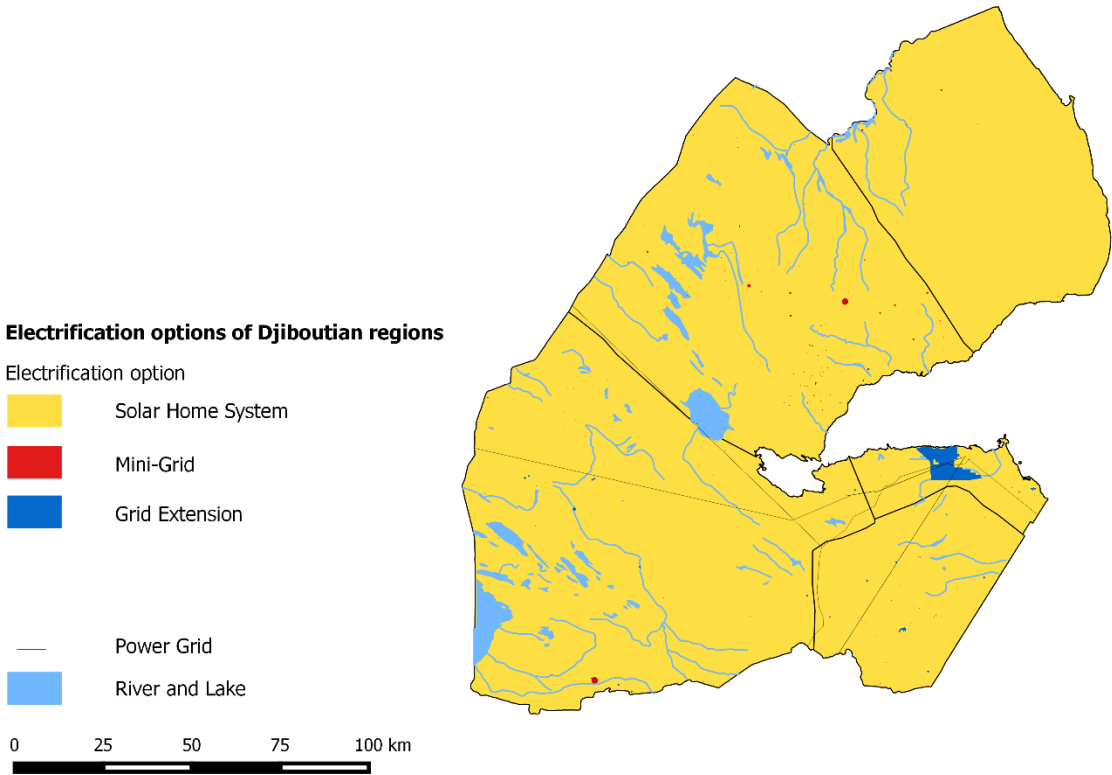

# Electrification option: GridPlanned-GridDom

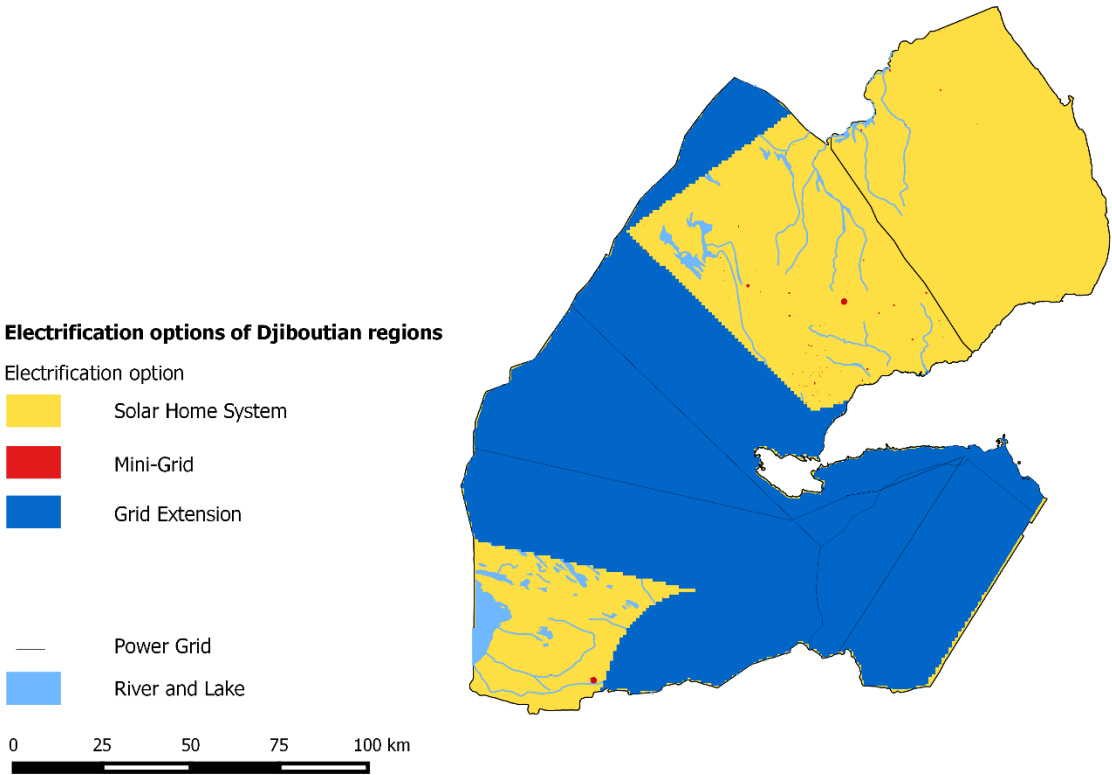

Share of electrification options in all Djiboutian regions

SHS (%) Mini-Grid (%) Grid (%)

GridPlanned-GridDom

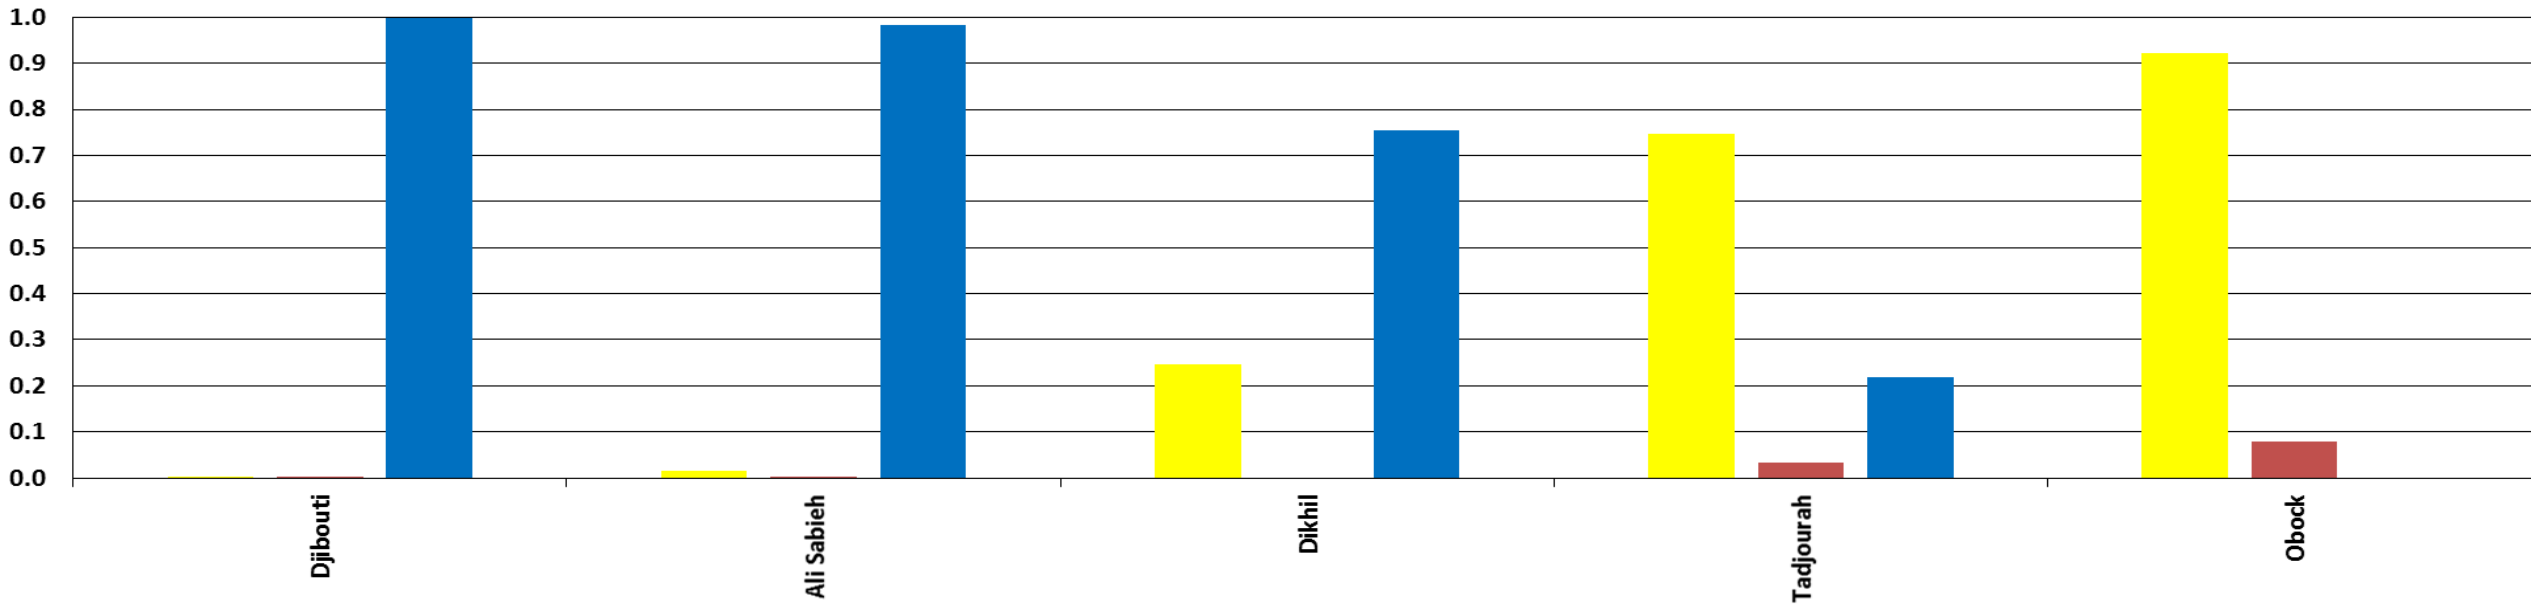

Share of electrification options in all Djiboutian regions

SHS (%) Mini-Grid (%) Grid (%)

GridPlanned-SHSDom

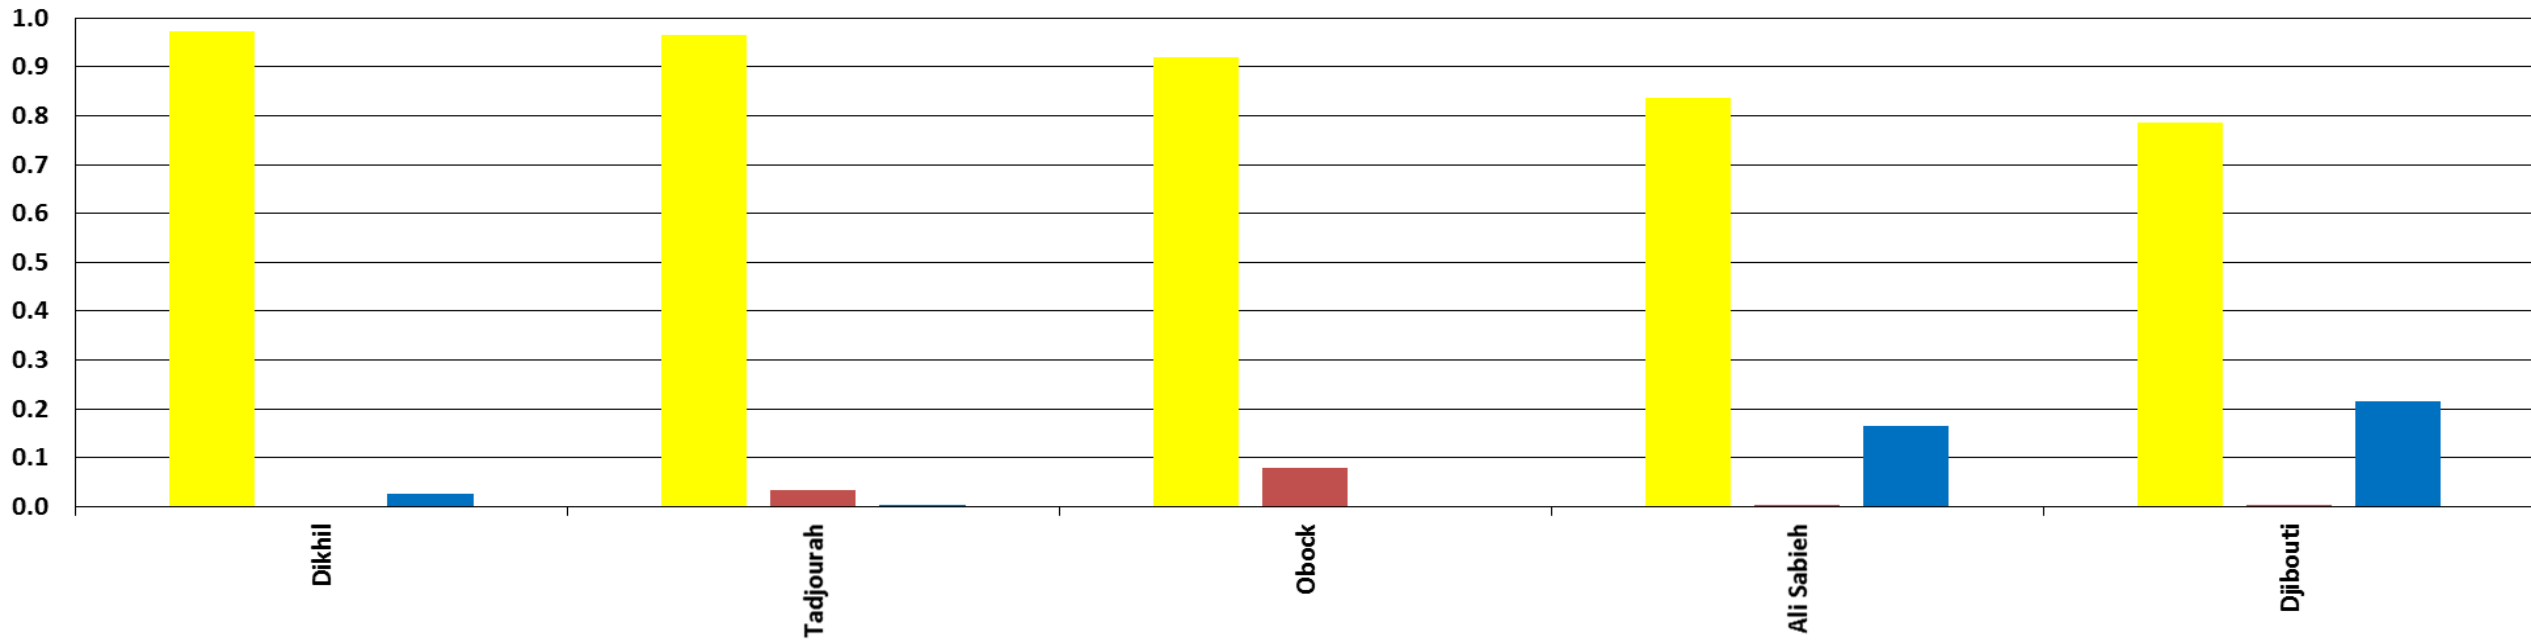

# Eritrea

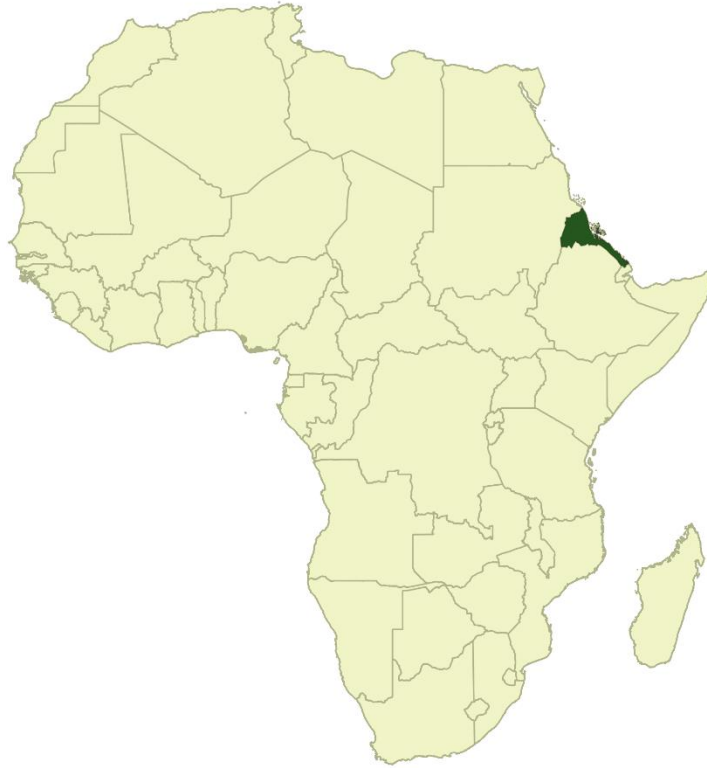

# Night light emission and Population of Eritrean regions

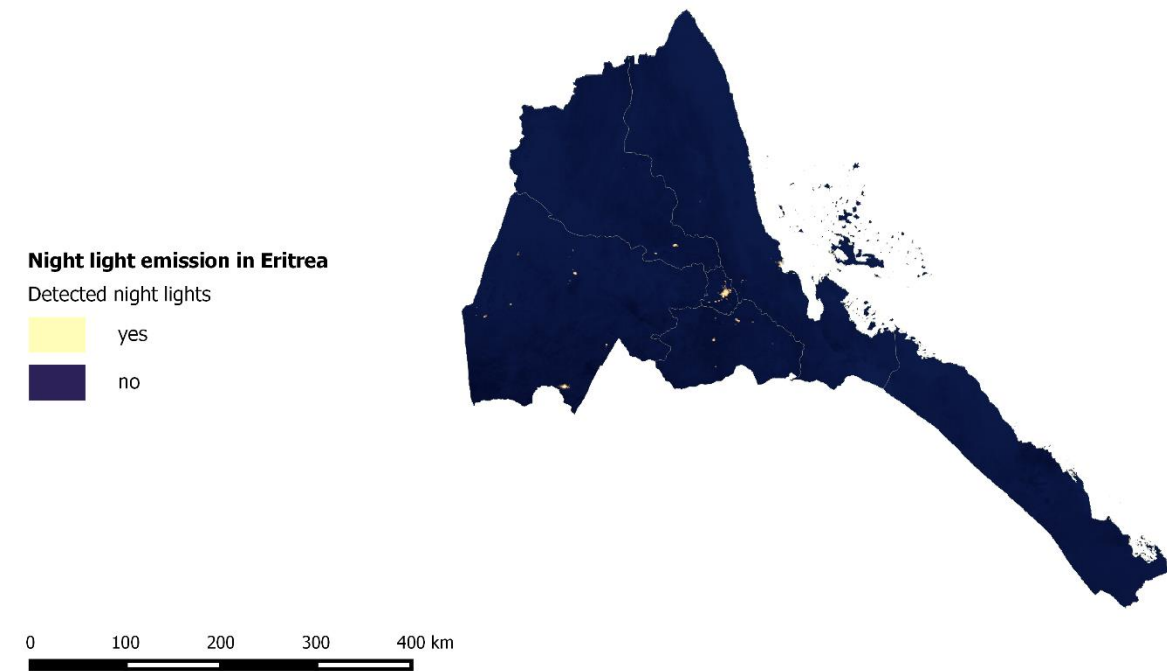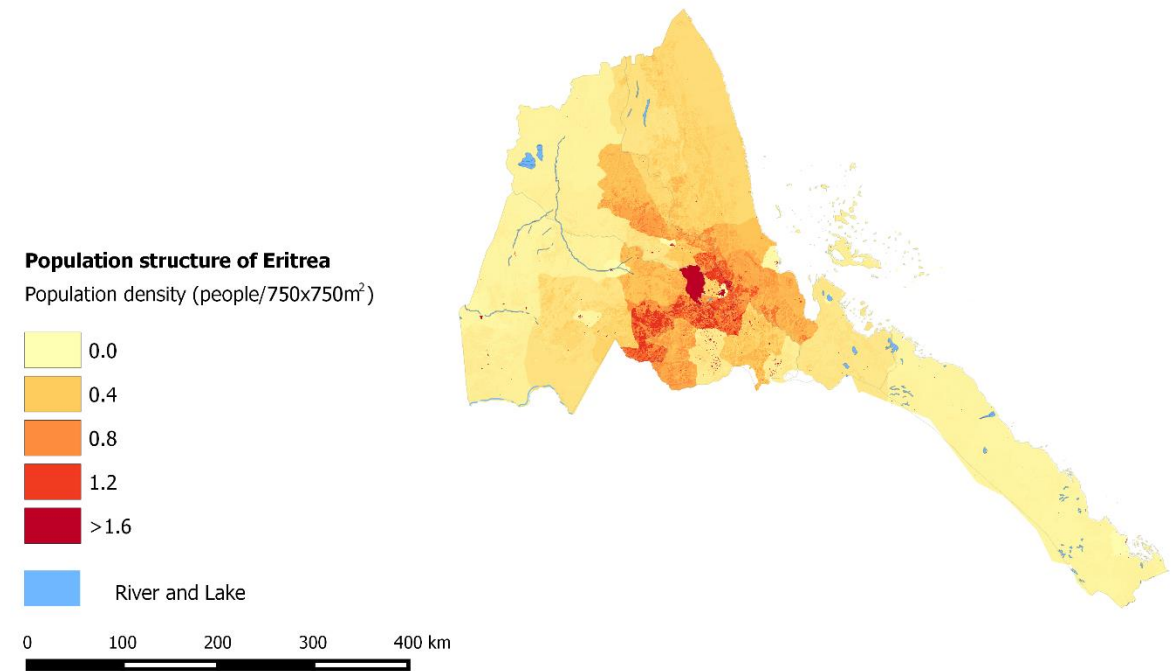

# Electrification option in all Eritrean regions: GridBuilt-GridDom

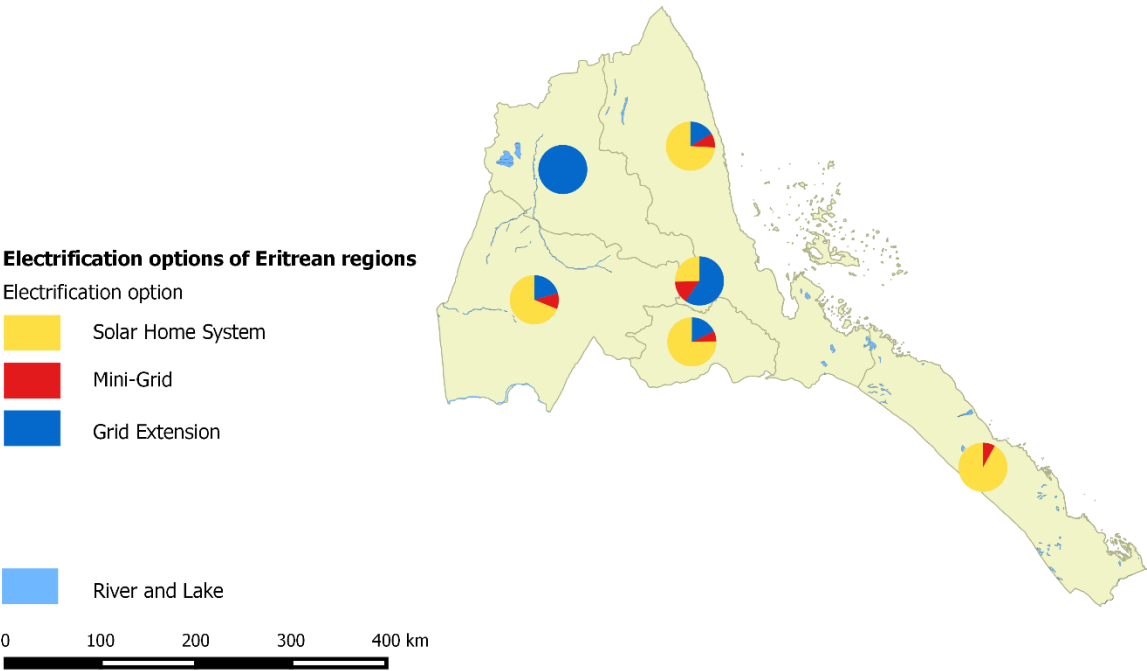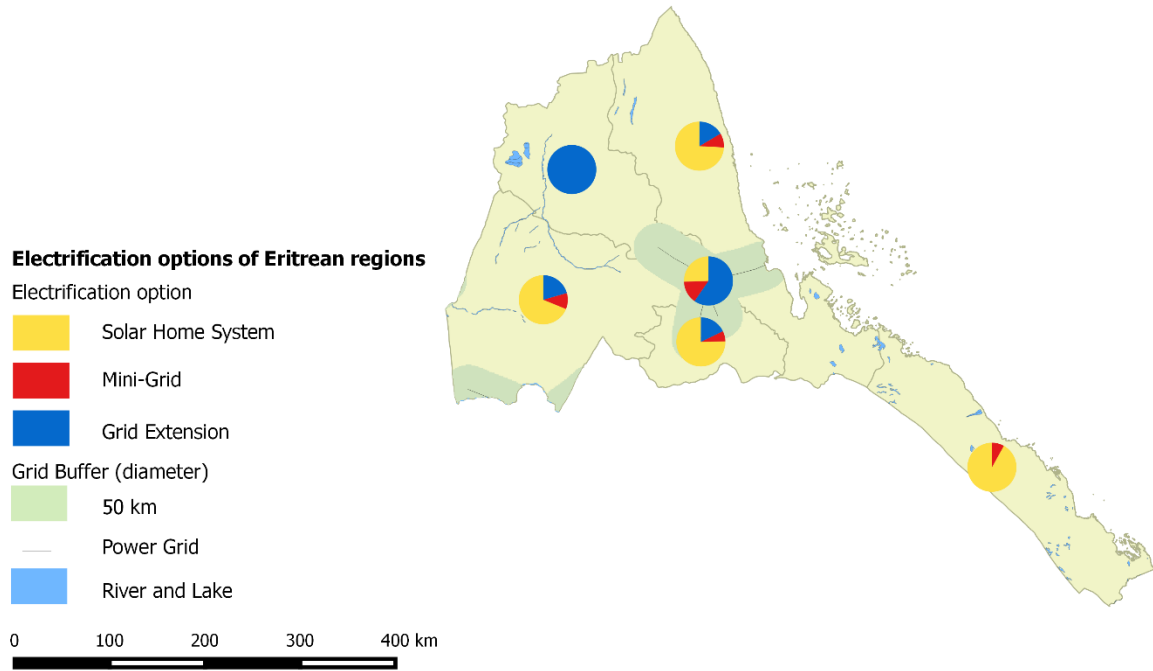

# Electrification option in all Eritrean regions: GridBuilt-SHSDom

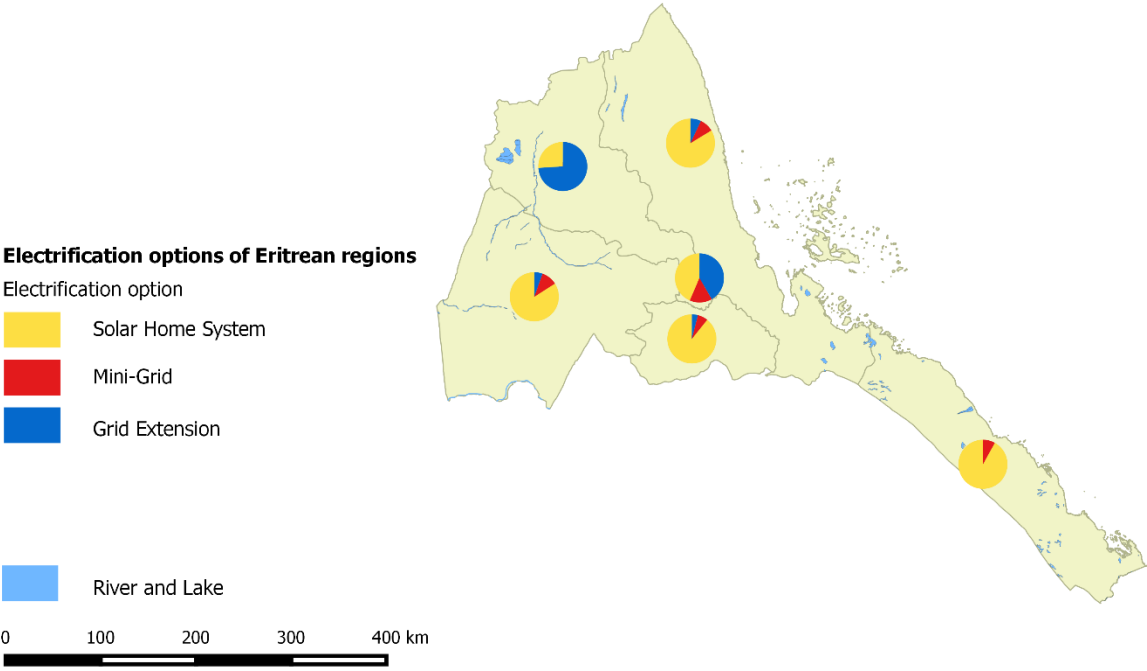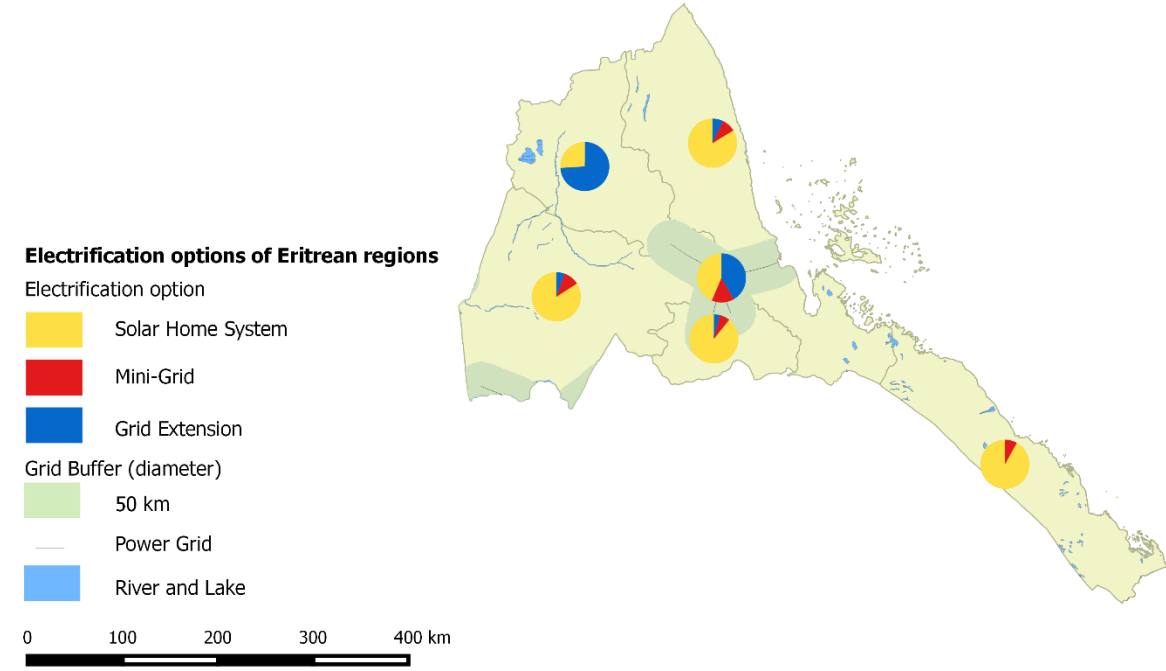

# Electrification option: GridBuilt-SHSDom

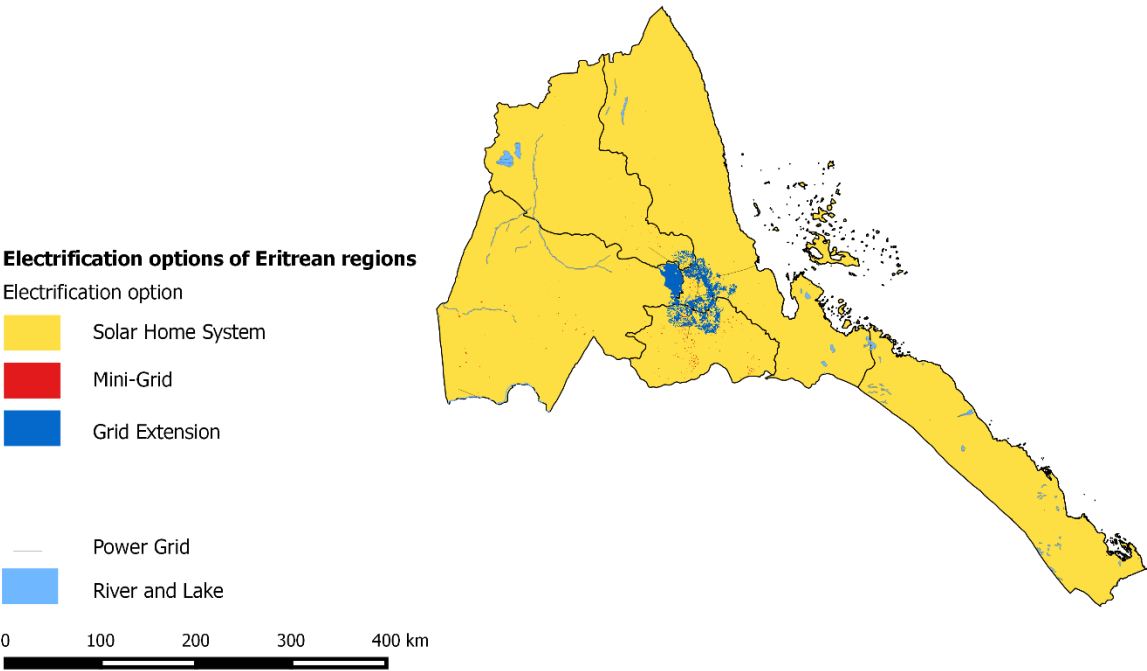

# Electrification option: GridBuilt-GridDom

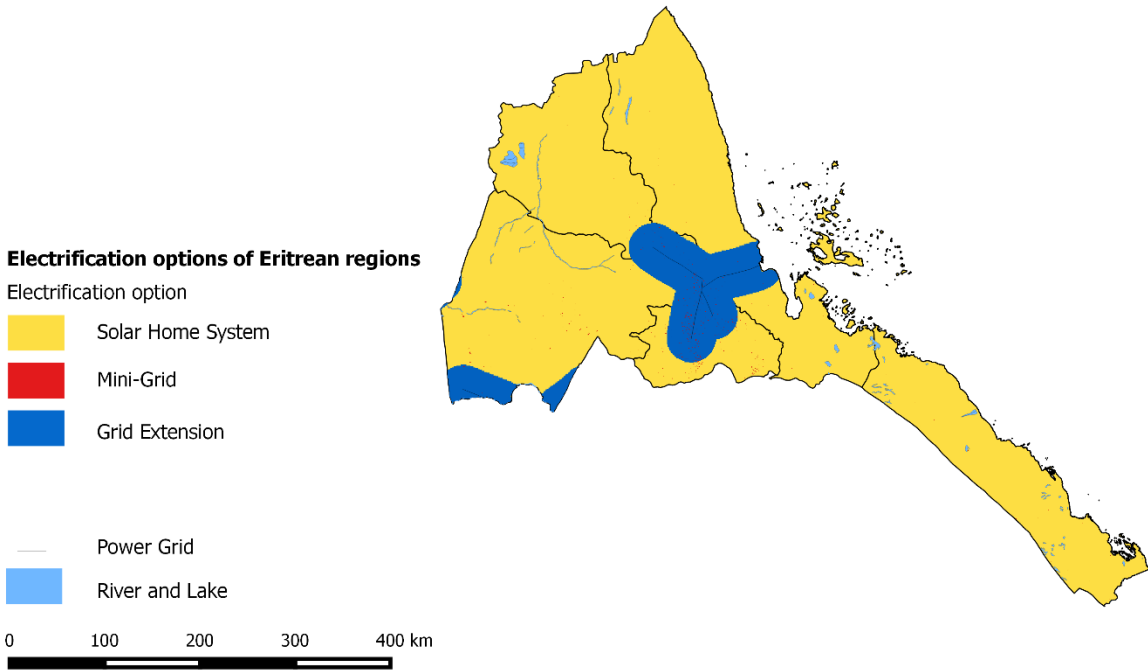

Share of electrification options in all Eritrean regions

SHS (%) Mini-Grid (%) Grid (%)

GridBuilt-GridDom

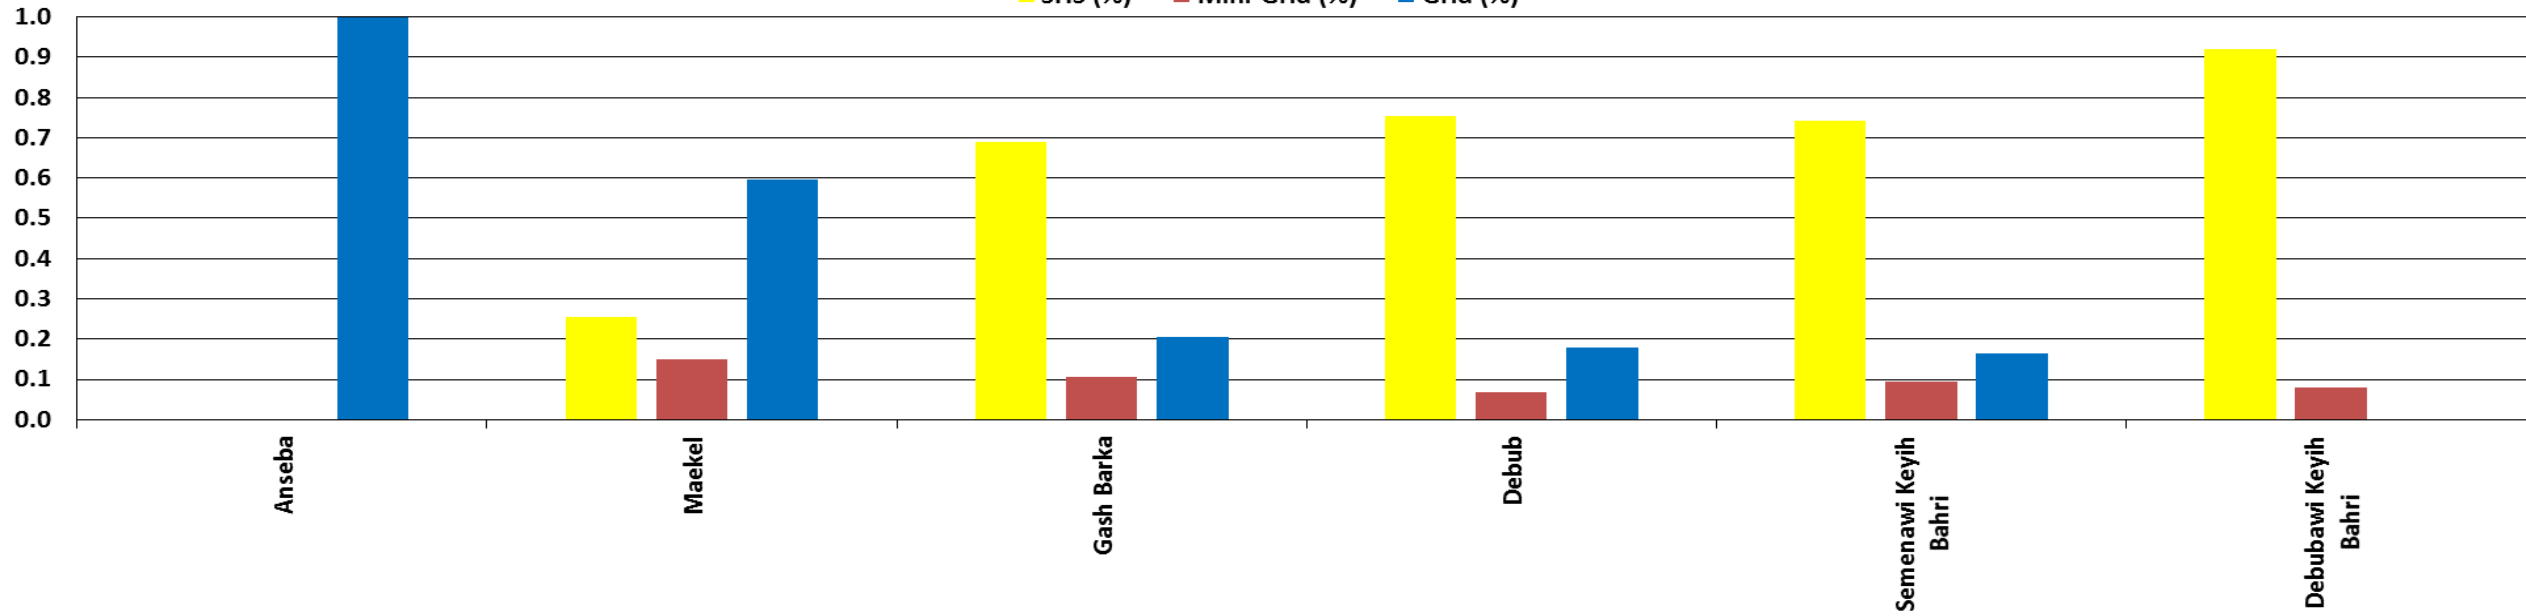

Share of electrification options in all Eritrean regions

SHS (%) Mini-Grid (%) Grid (%)

GridBuilt-SHSDom

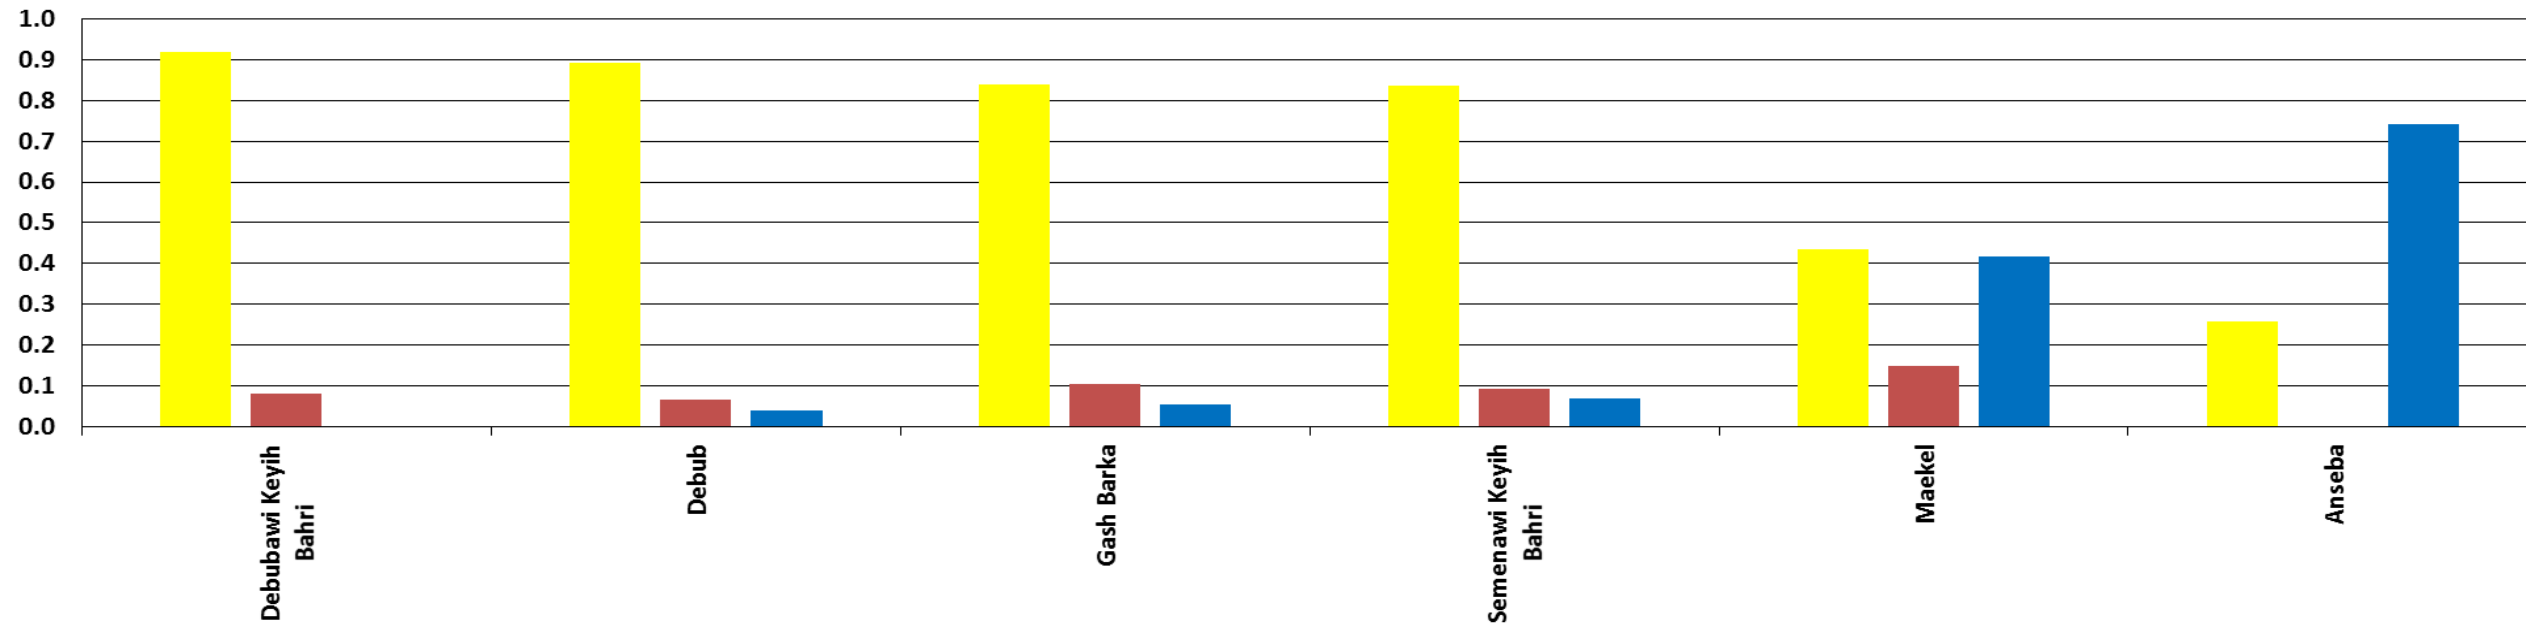

# Electrification option in all Eritrean regions: GridPlanned-GridDom

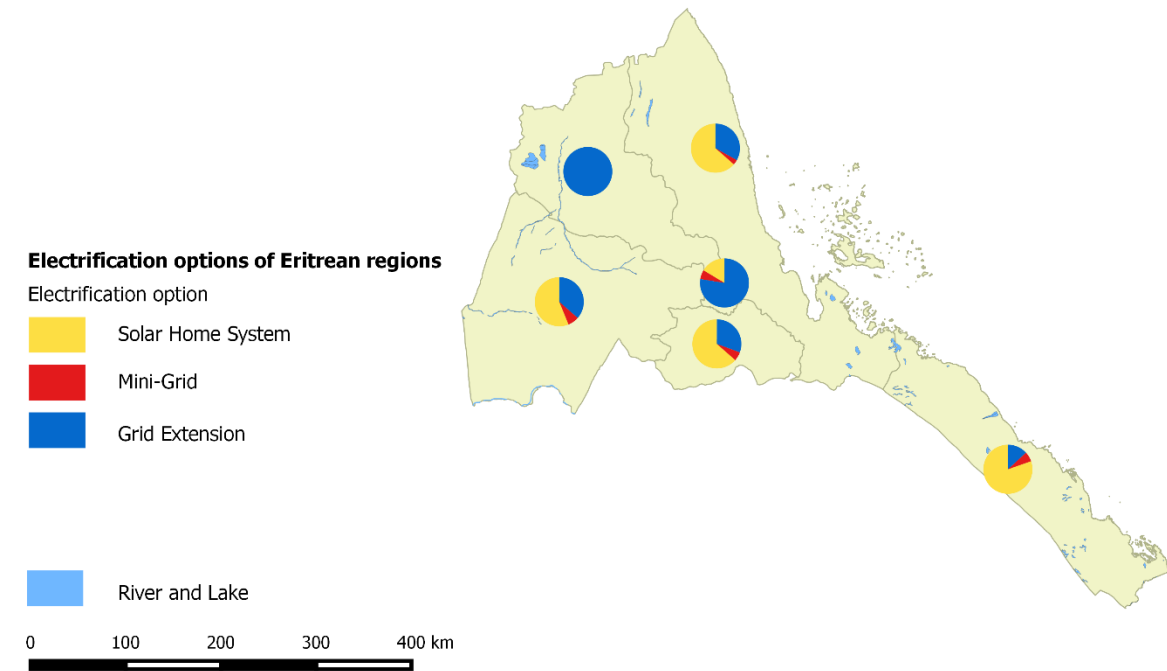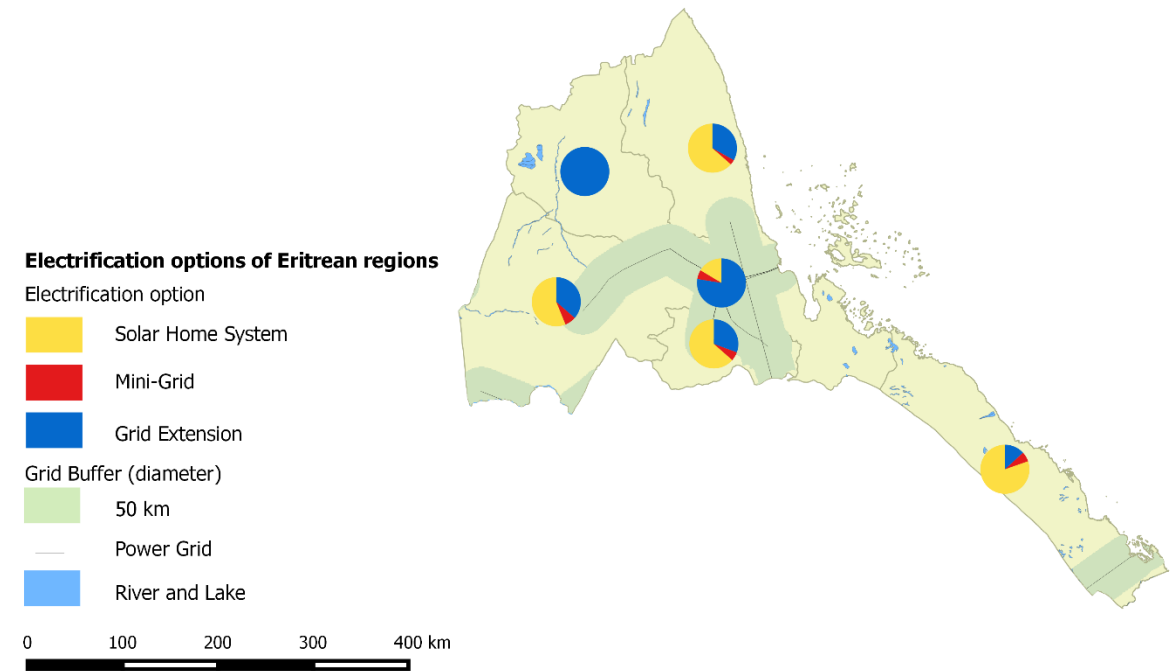

# Electrification option in all Eritrean regions: GridPlanned-SHSDom

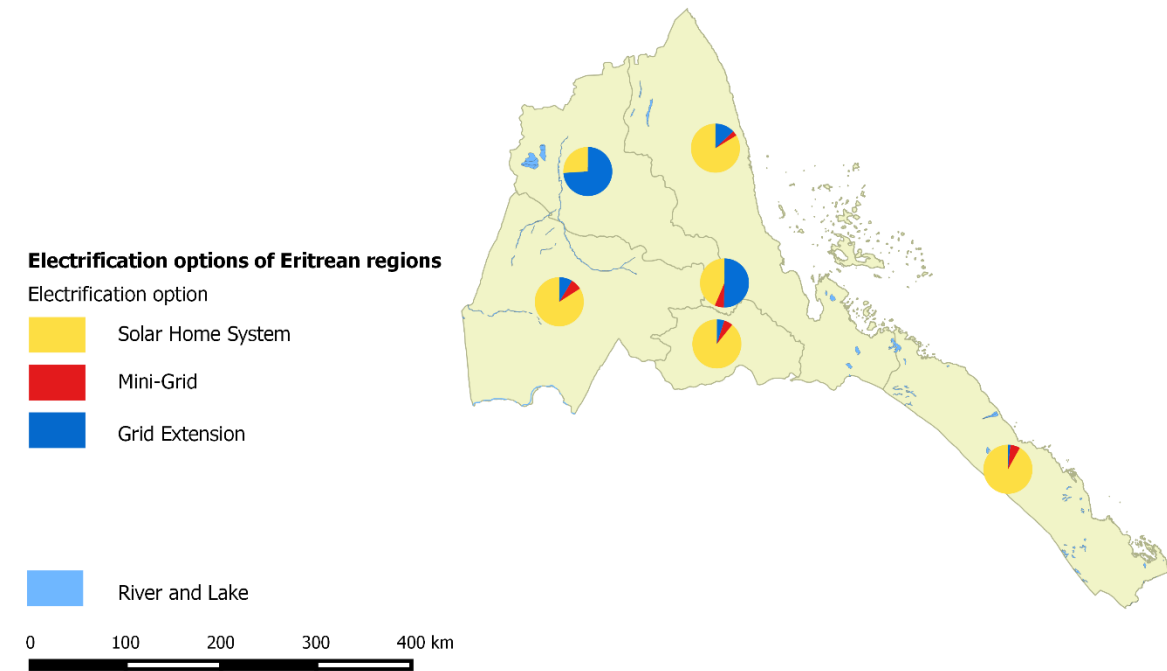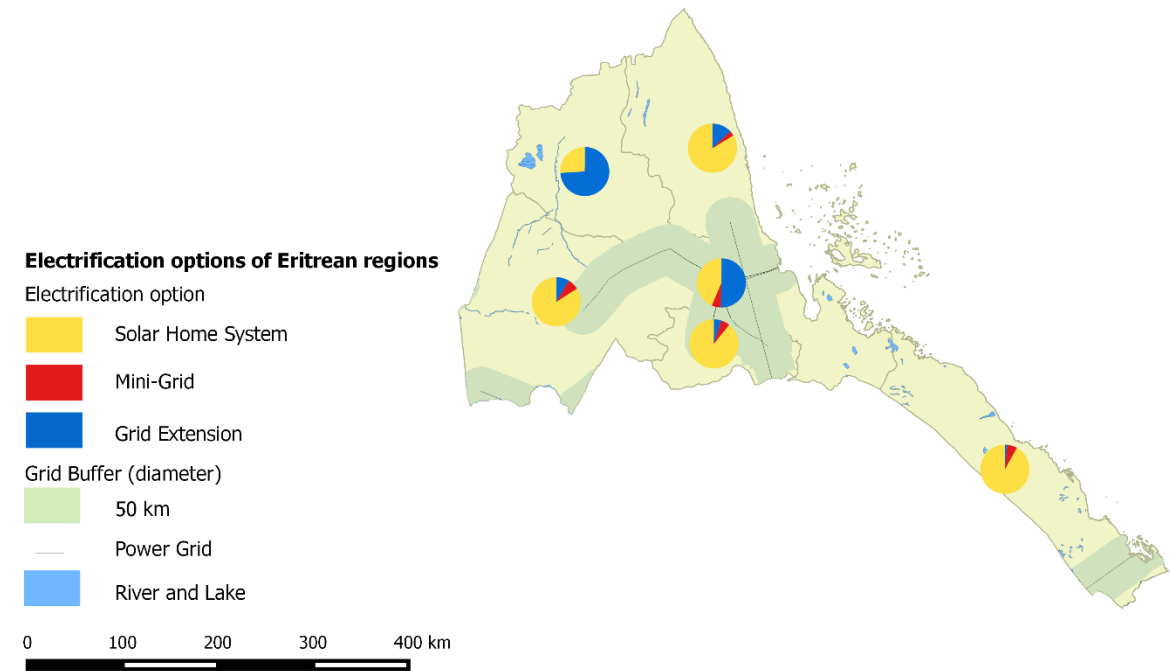

# Electrification option: GridPlanned-SHSDom

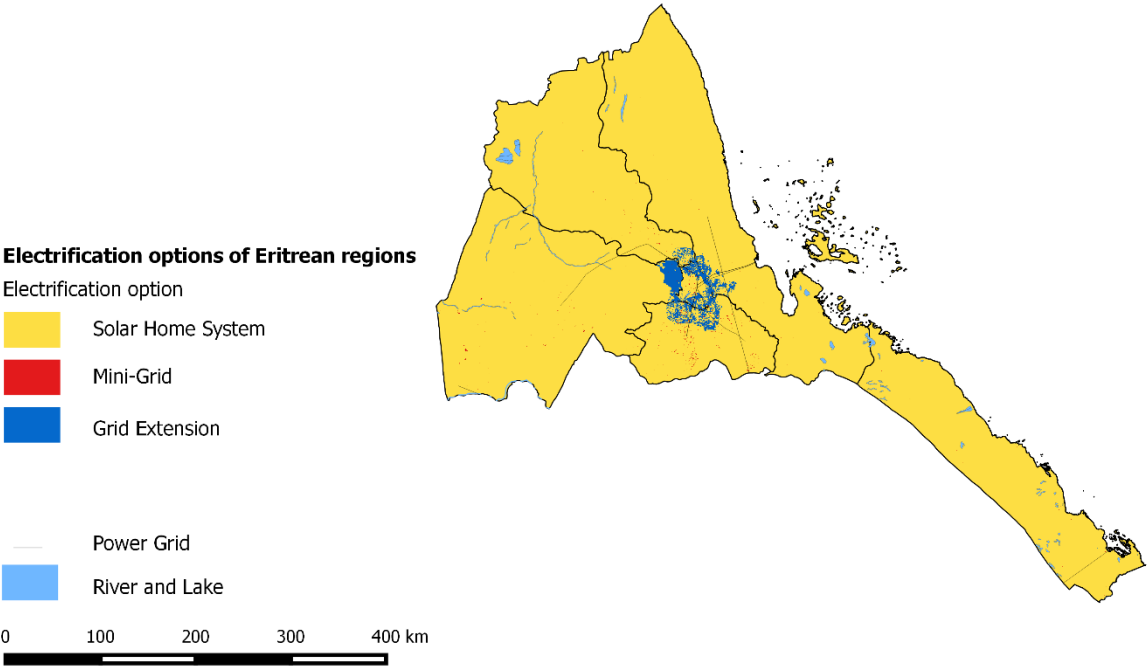

# Electrification option: GridPlanned-GridDom

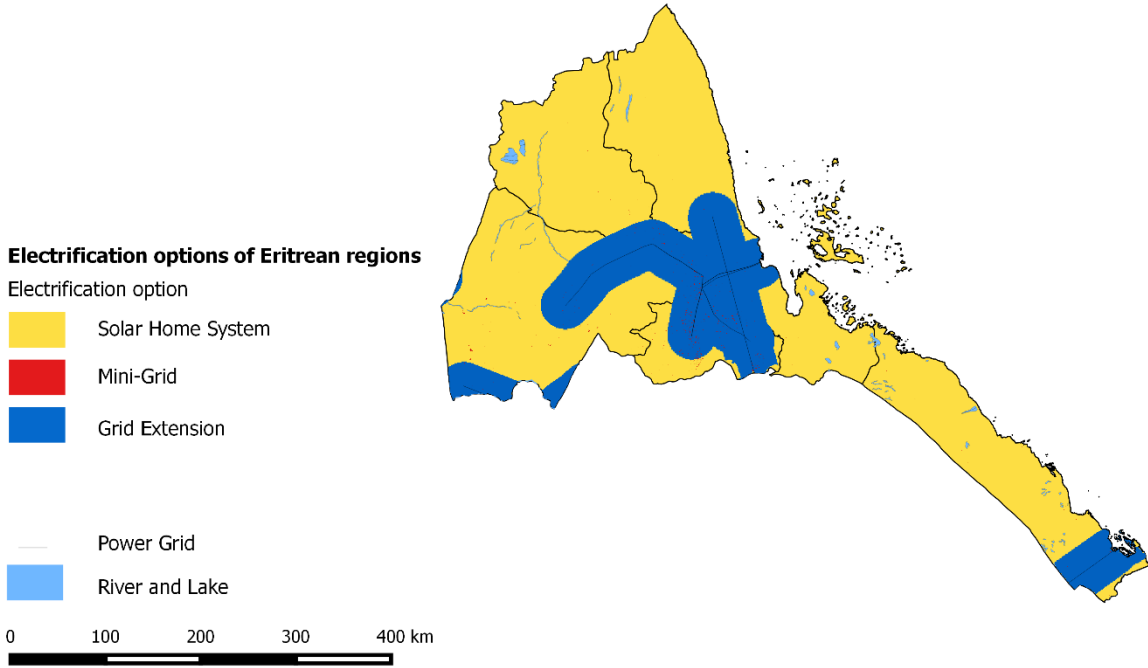

Share of electrification options in all Eritrean regions

SHS (%) Mini-Grid (%) Grid (%)

GridPlanned-GridDom

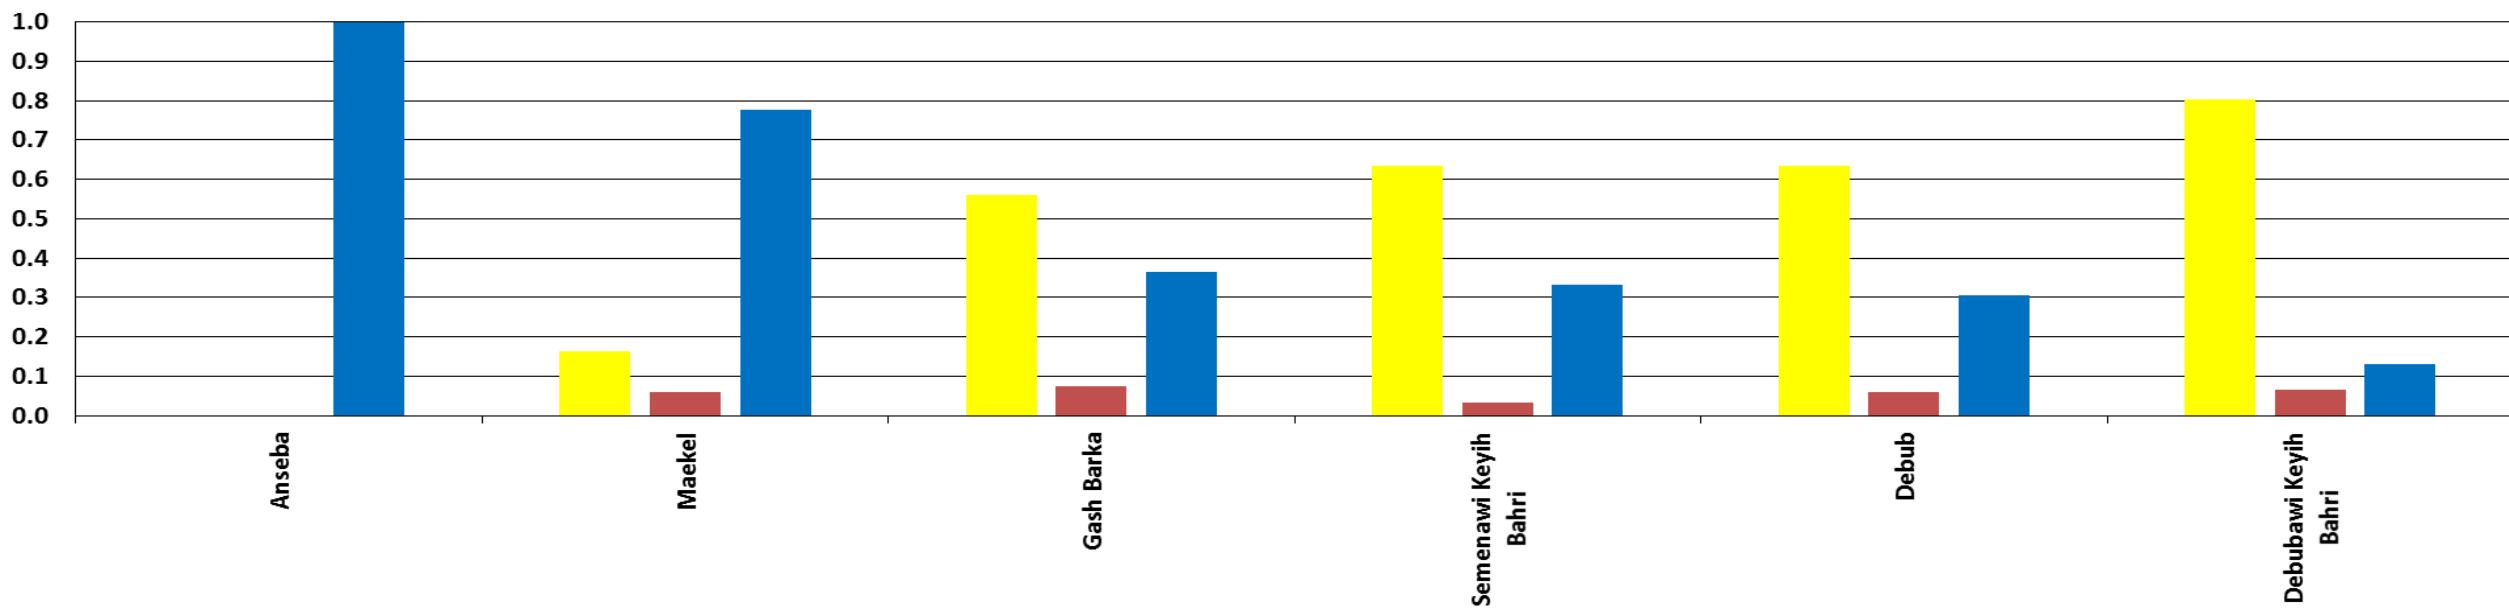

Share of electrification options in all Eritrean regions

SHS (%) Mini-Grid (%) Grid (%)

GridPlanned-SHSDom

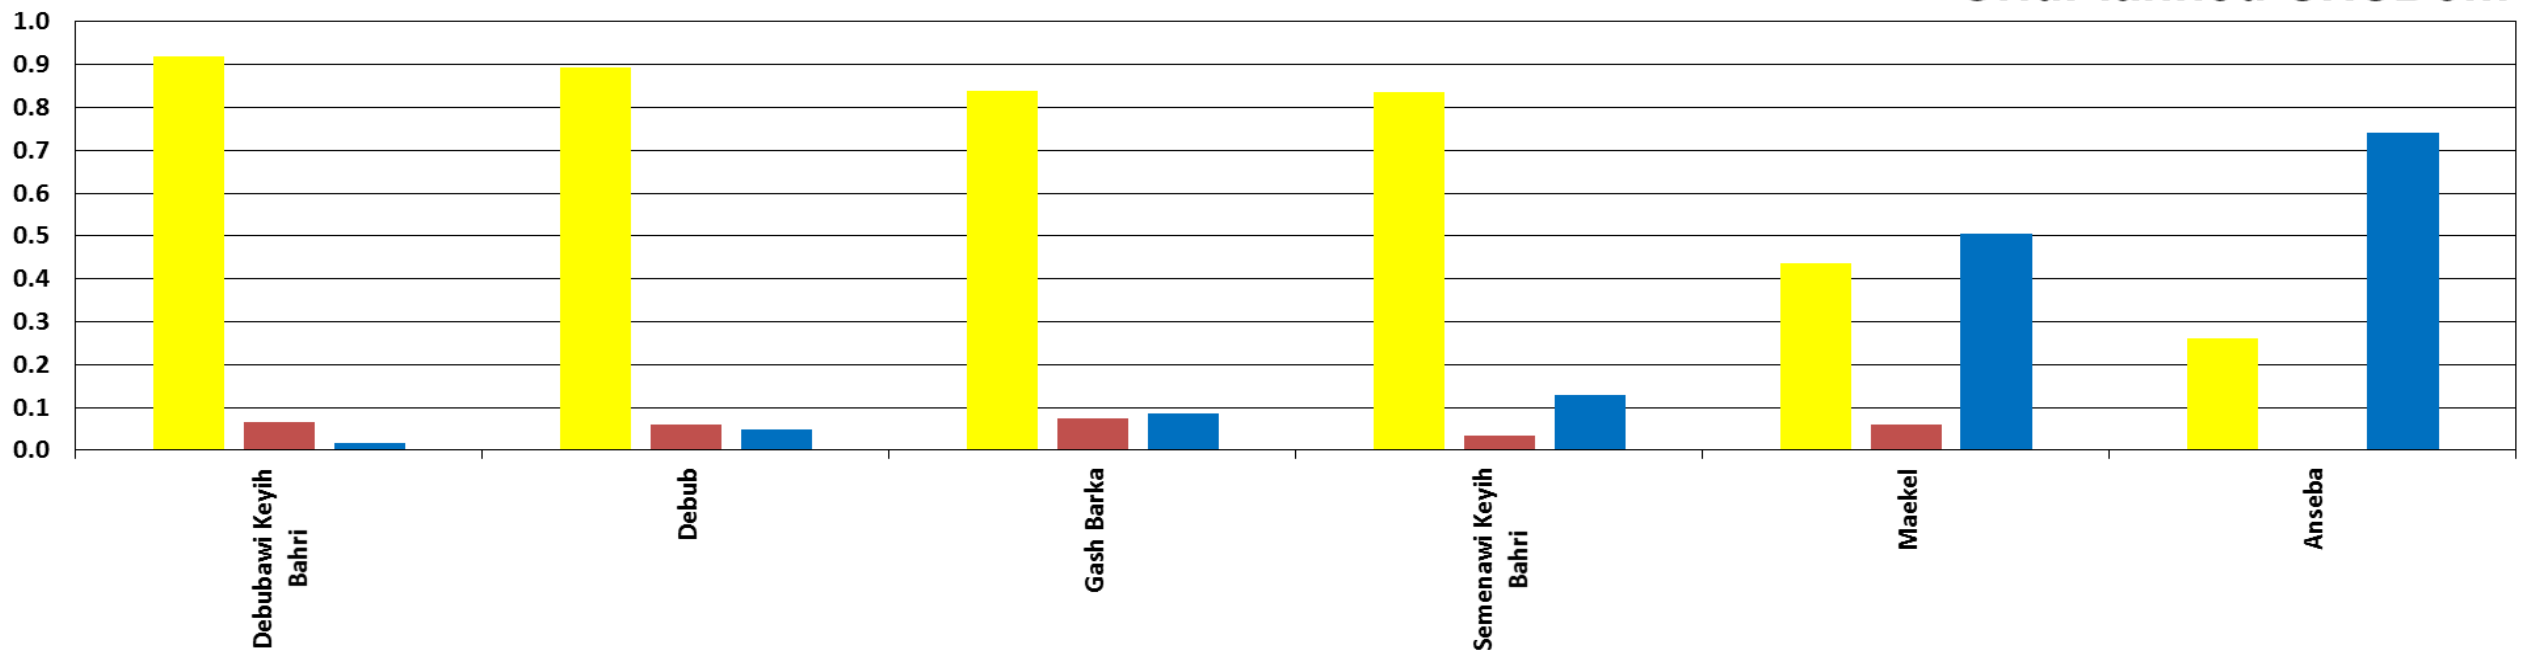

# Ethiopia

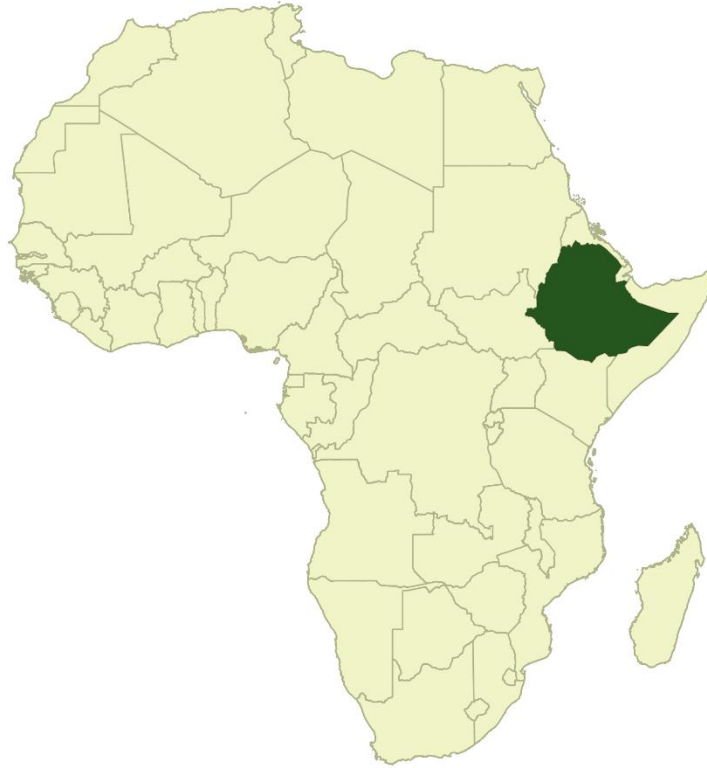

# Night light emission and Population of Ethiopian regions

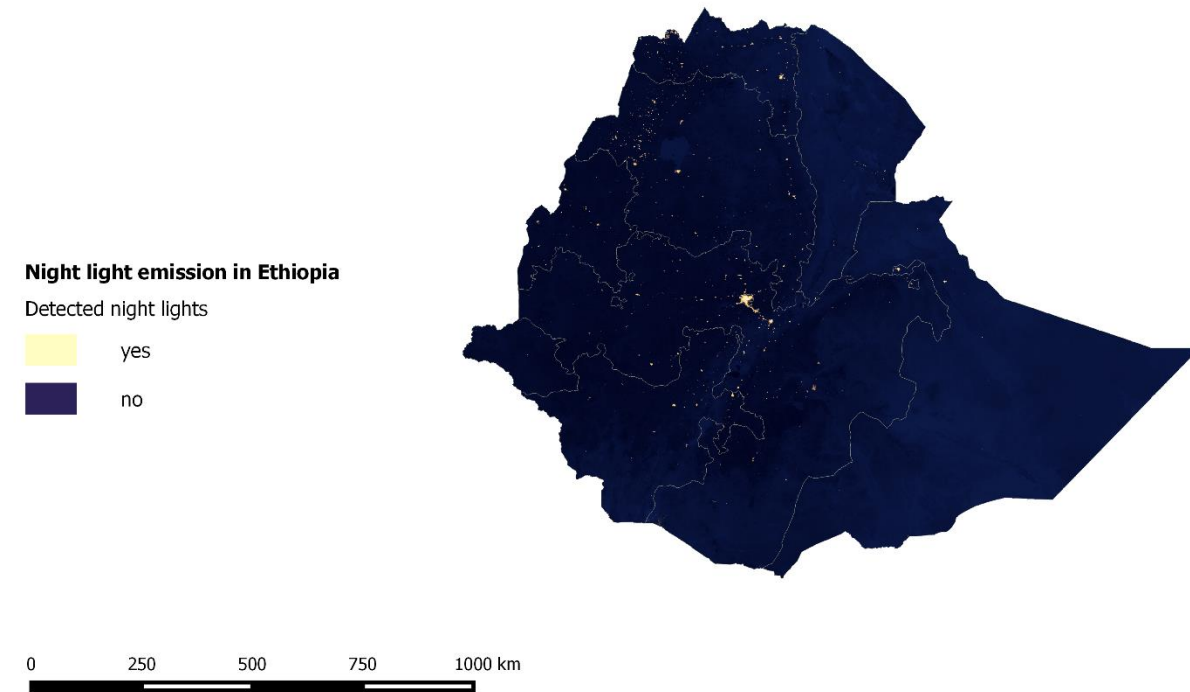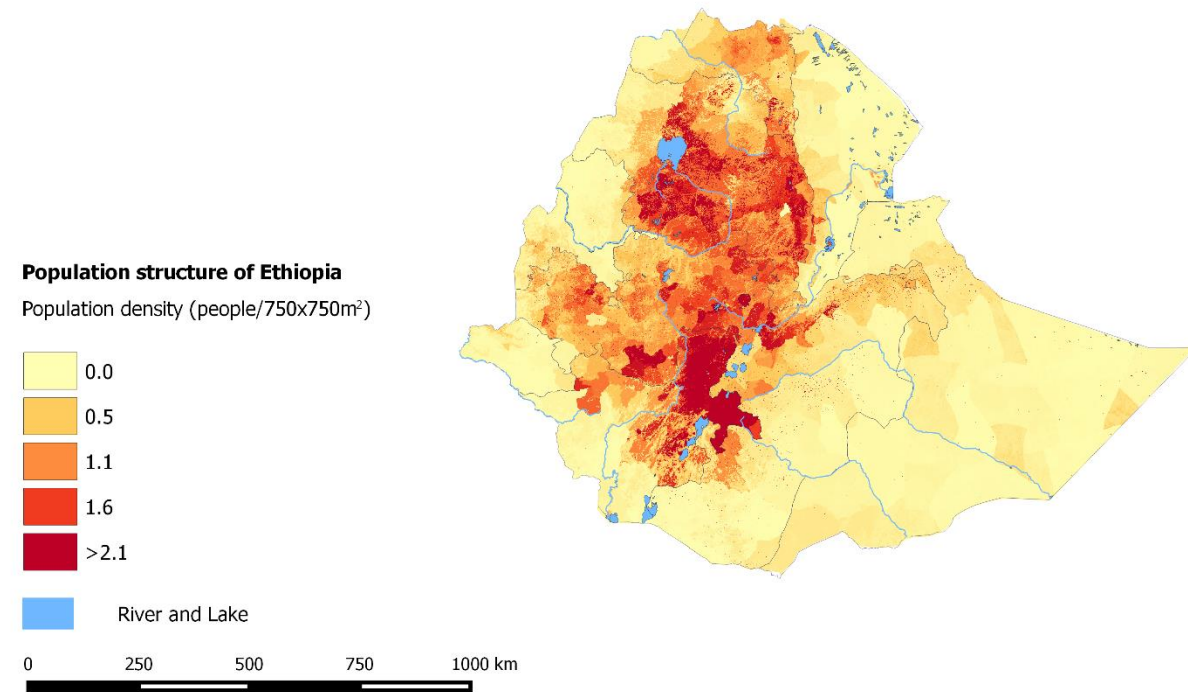

# Electrification option in all Ethiopian regions: GridBuilt-GridDom

Electrification options of Ethiopian regions

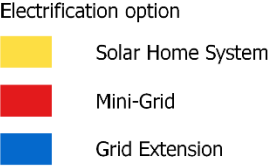

River and Lake

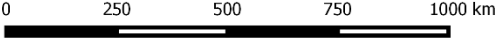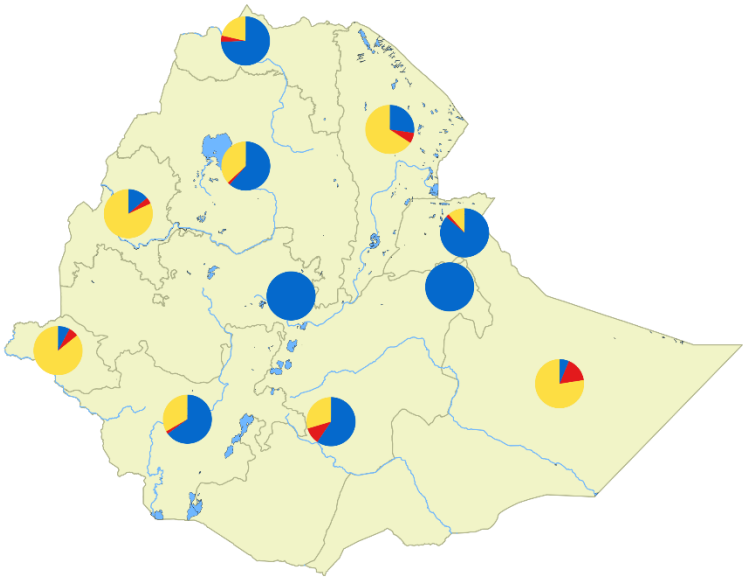

Electrification options of Ethiopian regions

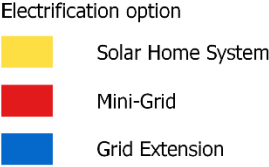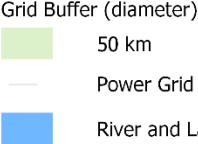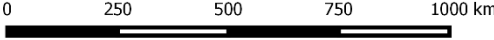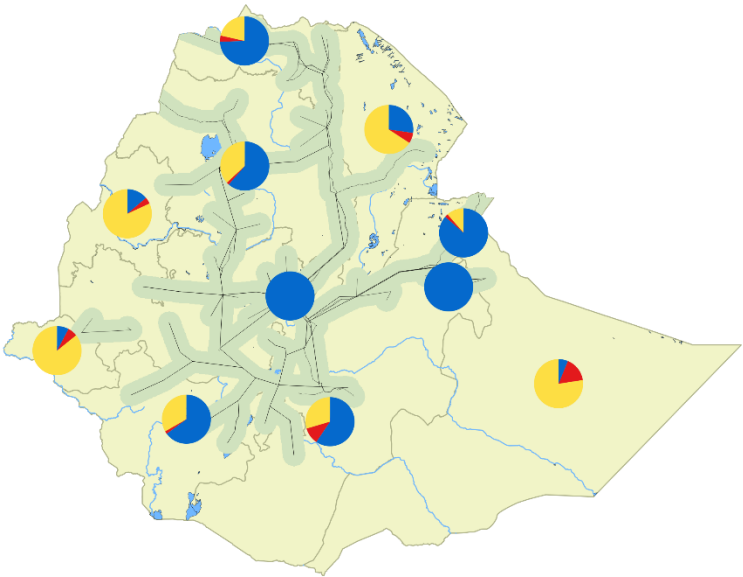

# Electrification option in all Ethiopian regions: GridBuilt-SHSDom

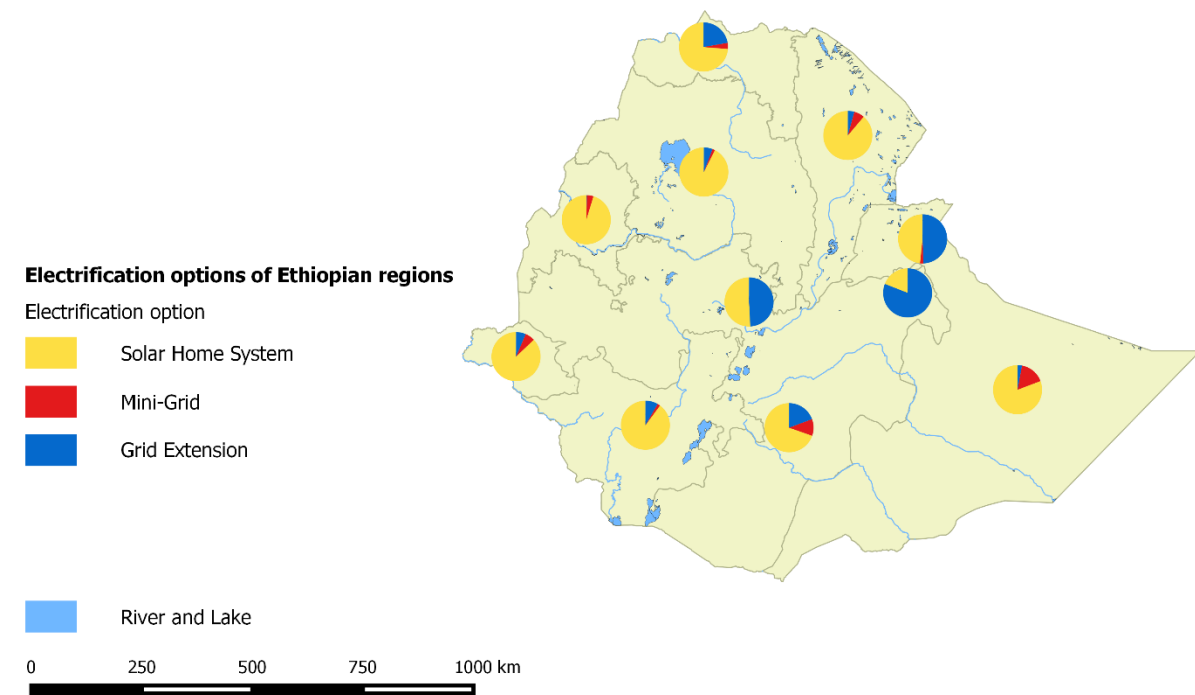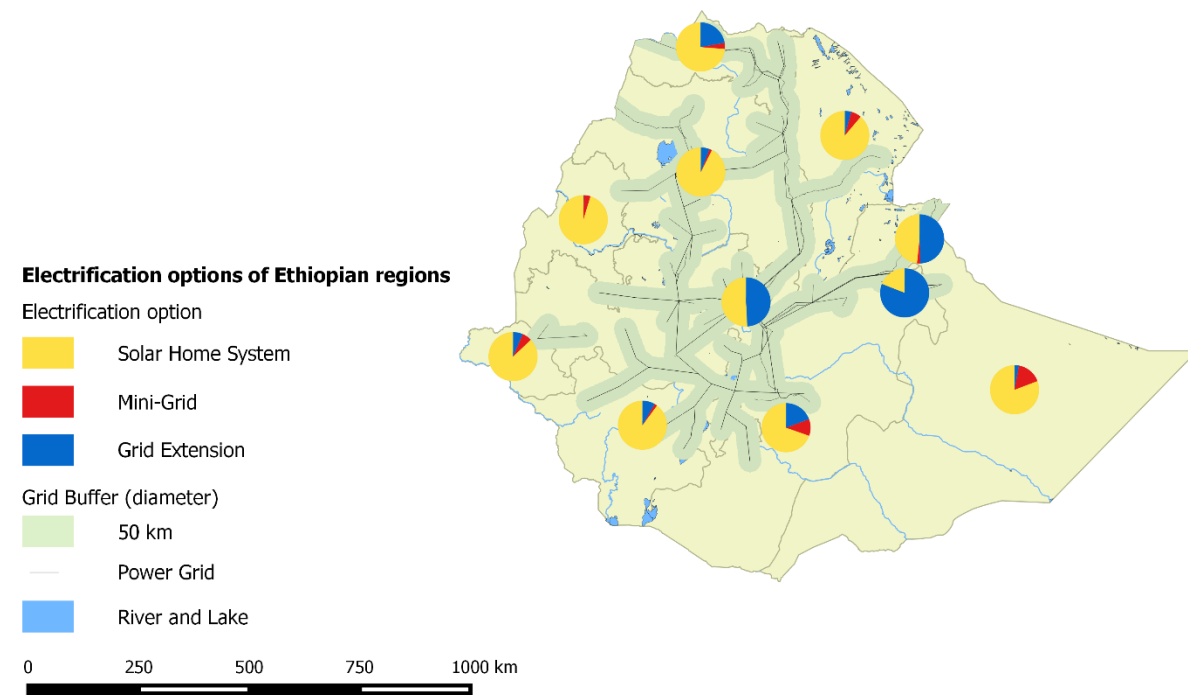

# Electrification option: GridBuilt-SHSDom

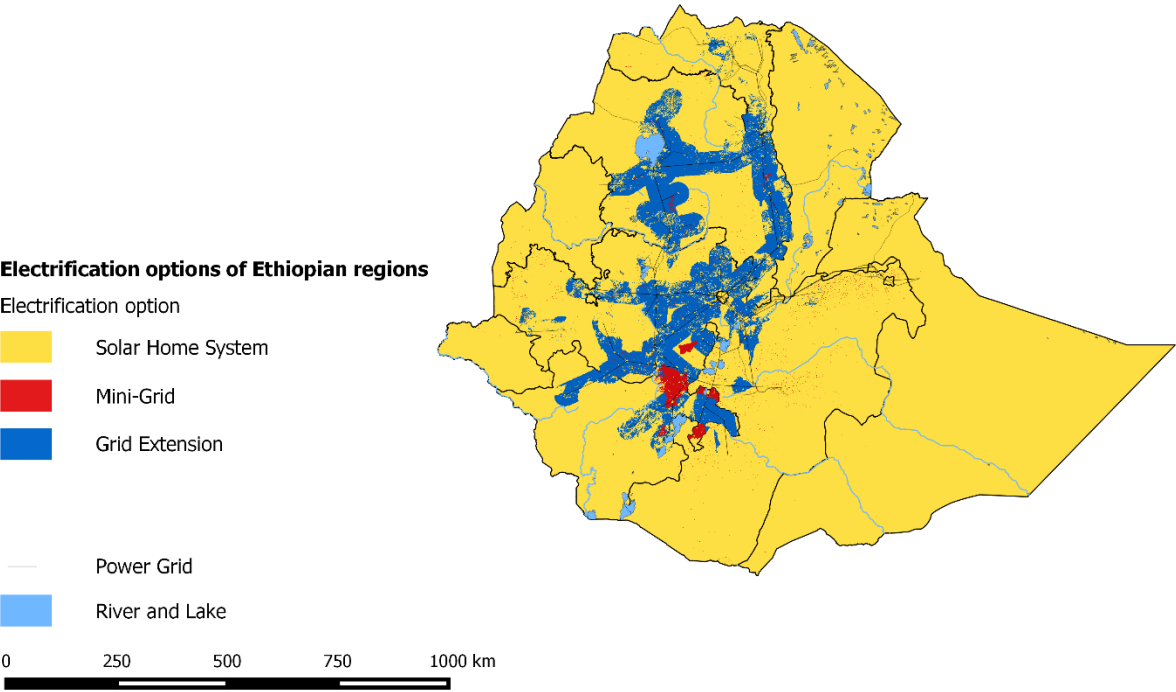

# Electrification option: GridBuilt-GridDom

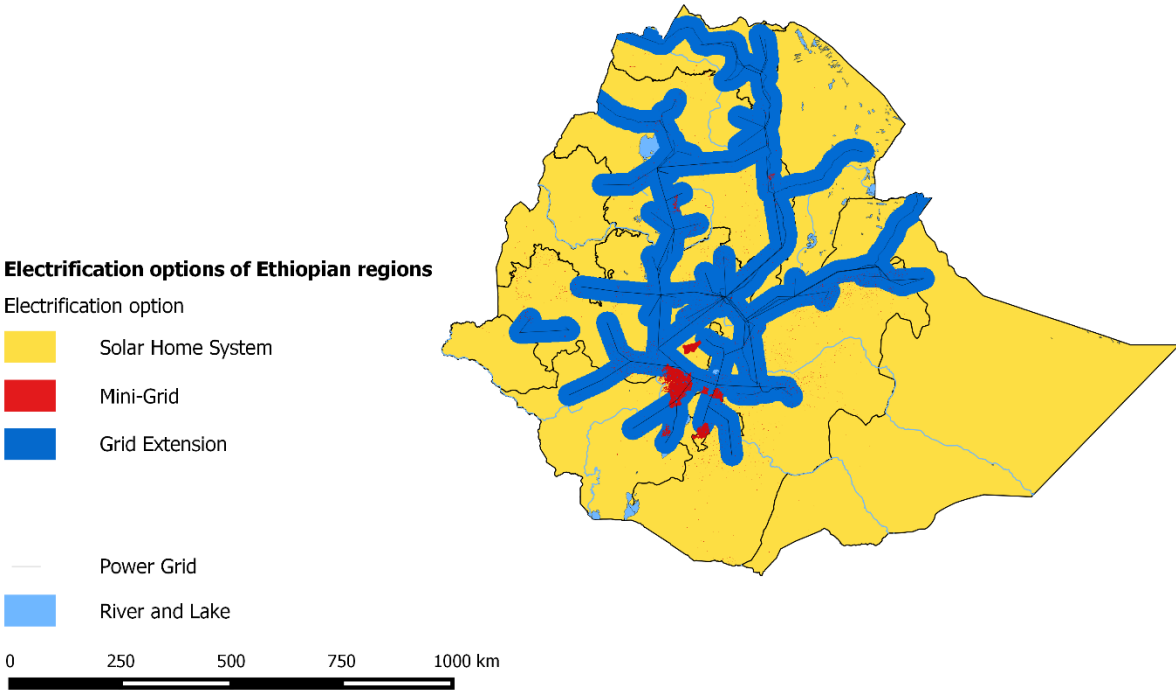

Share of electrification options in all Ethiopian regions

SHS (%) Mini-Grid (%) Grid (%)

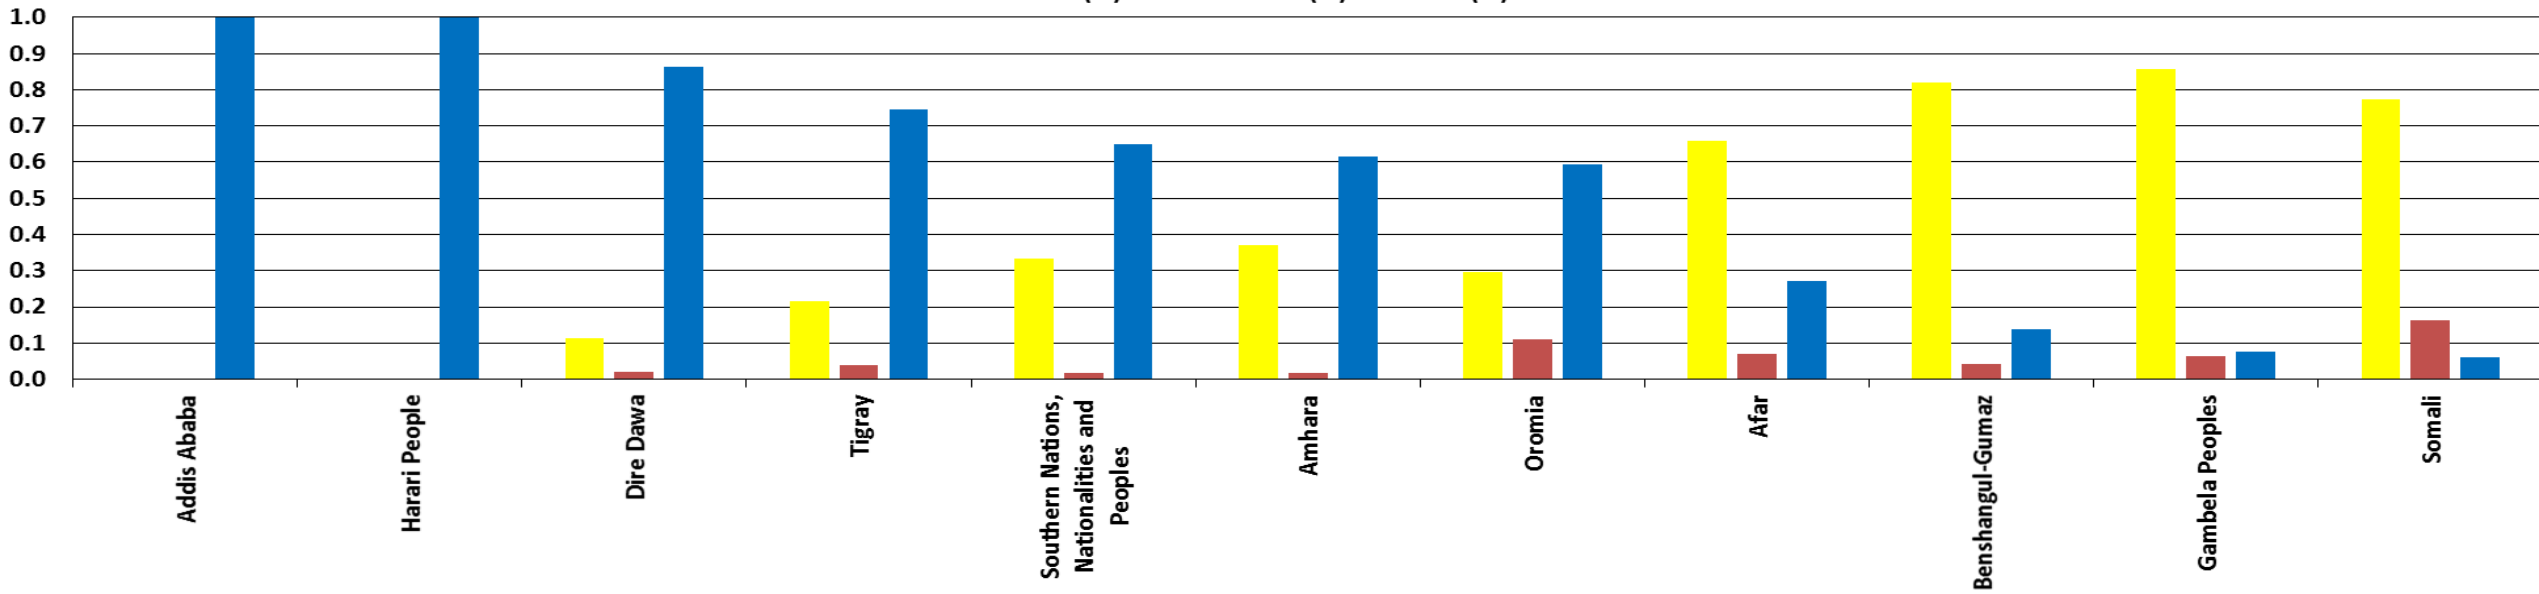

Share of electrification options in all Ethiopian regions

SHS (%) Mini-Grid (%) Grid (%)

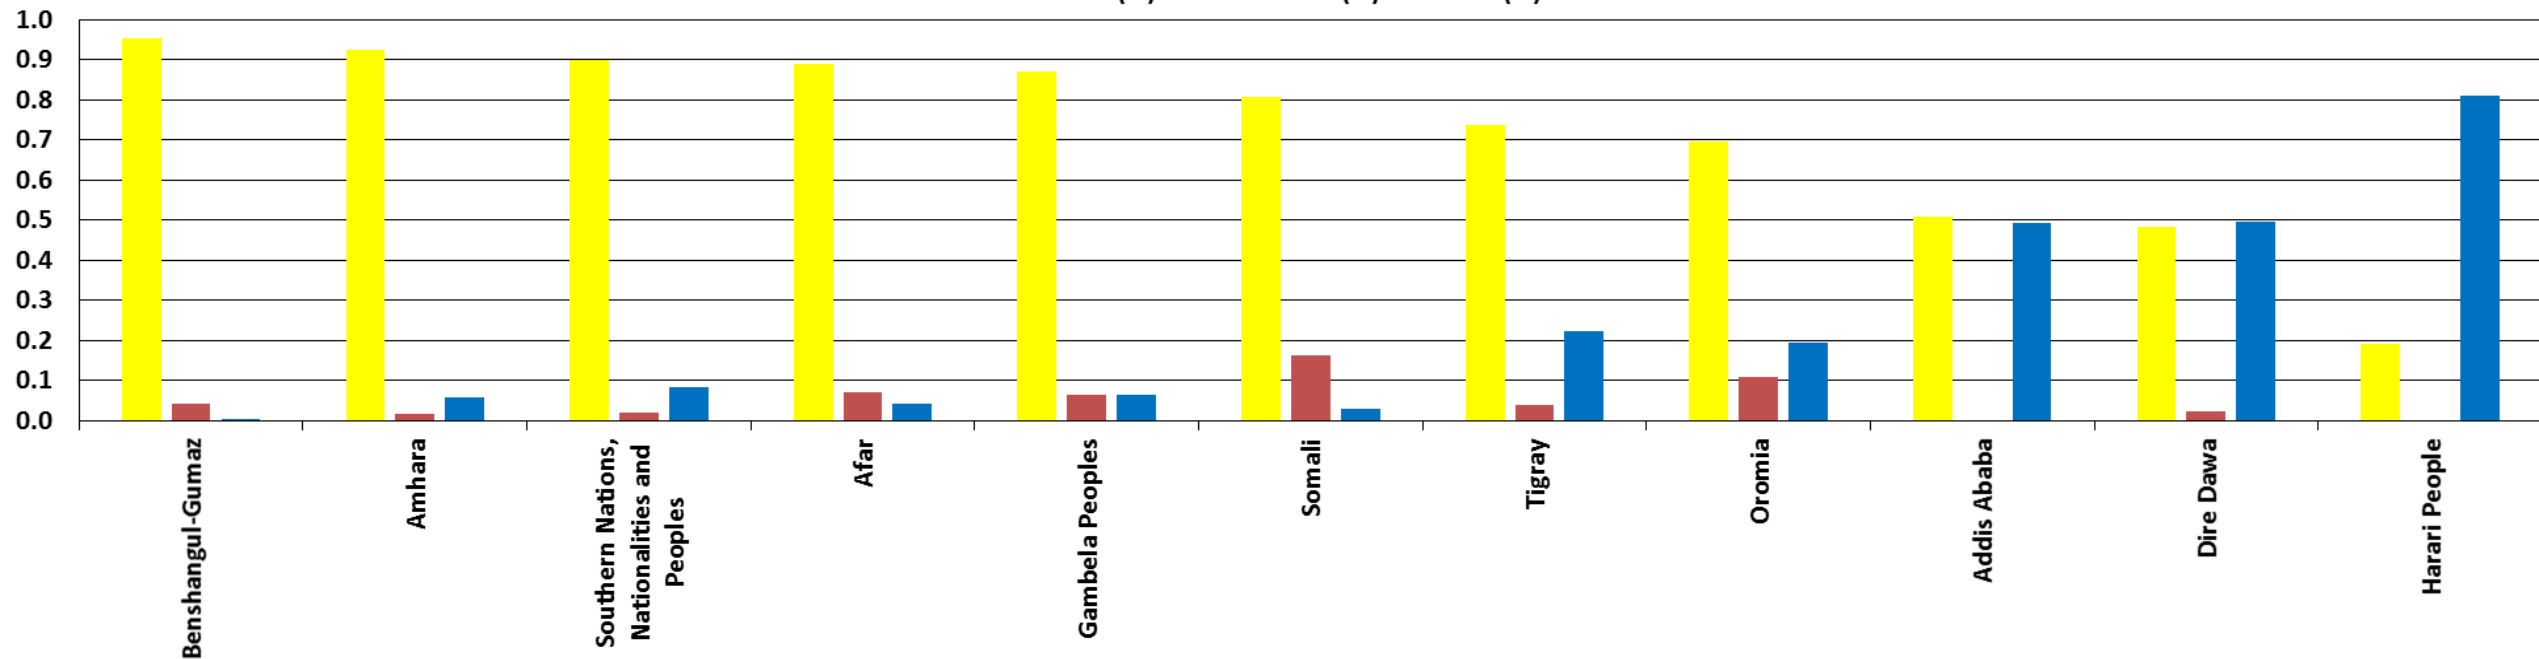

# Electrification option in all Ethiopian regions: GridPlanned-GridDom

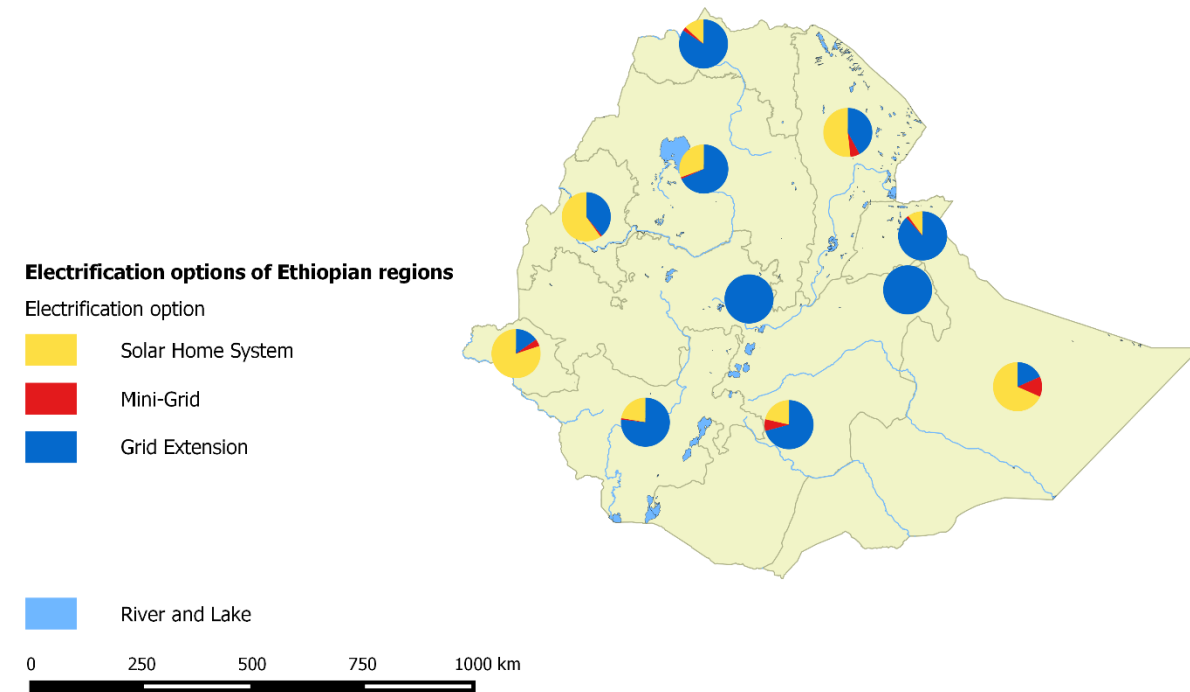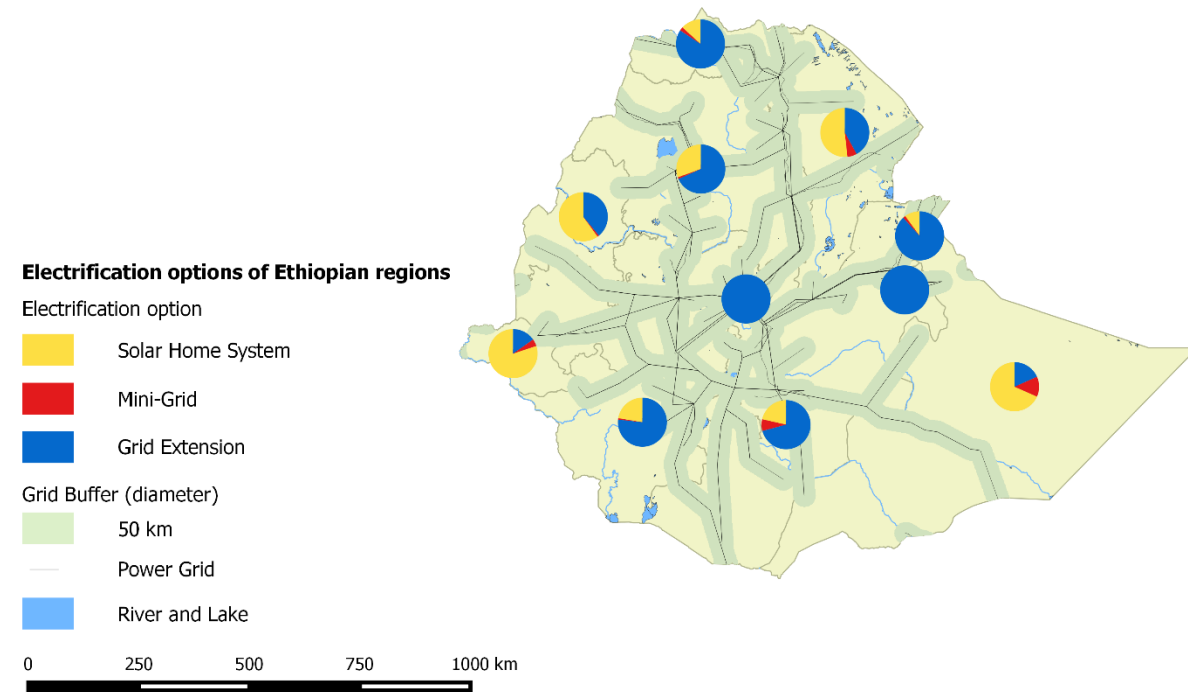

# Electrification option in all Ethiopian regions: GridPlanned-SHSDom

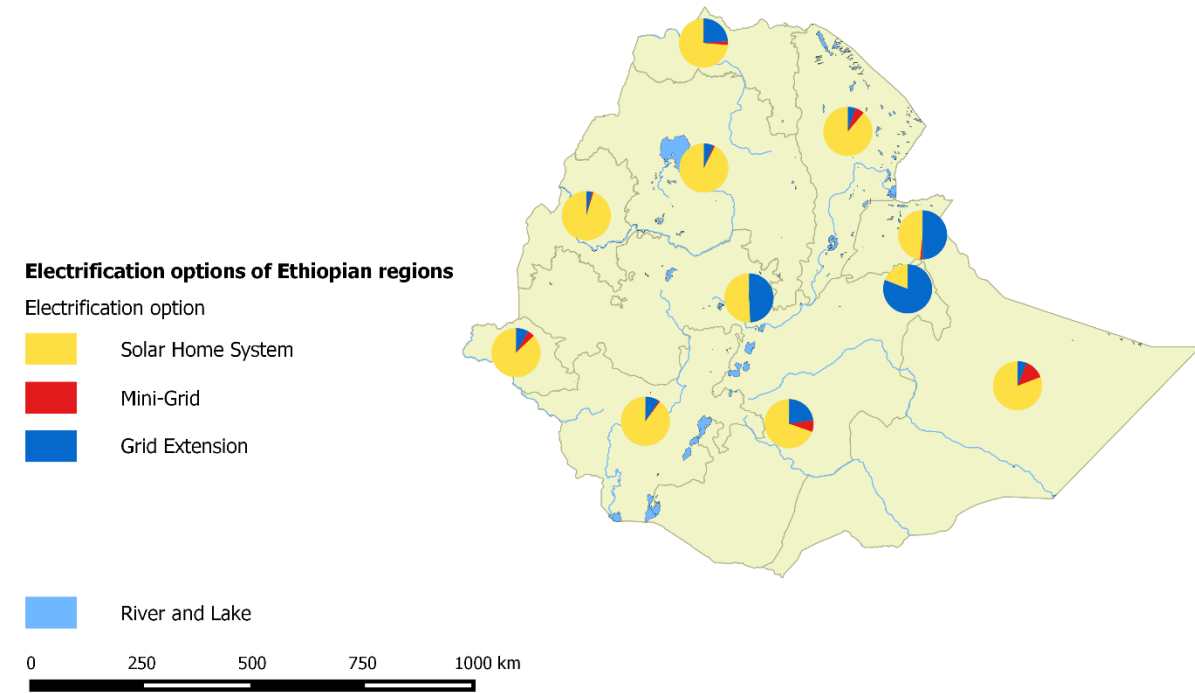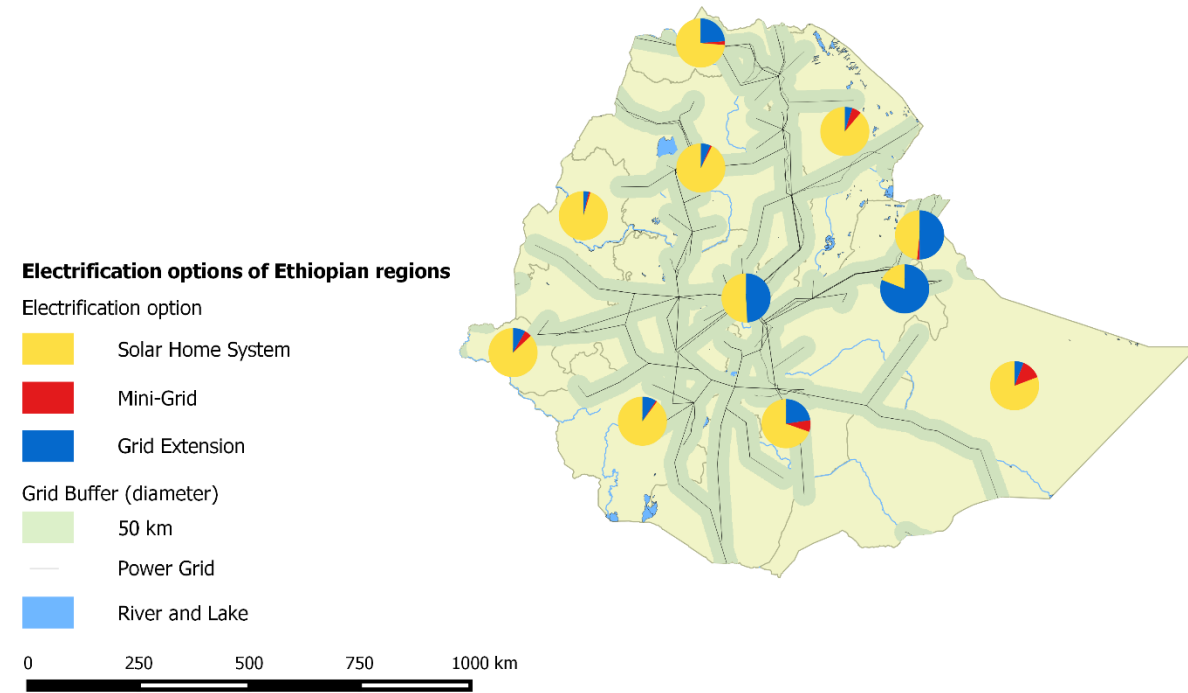

# Electrification option: GridPlanned-SHSDom

# Electrification option: GridPlanned-GridDom

Electrification options of Ethiopian regions

- Electrification option
- Solar Home System
  - Mini-Grid
  - Grid Extension

- Power Grid
- River and Lake

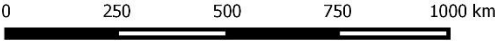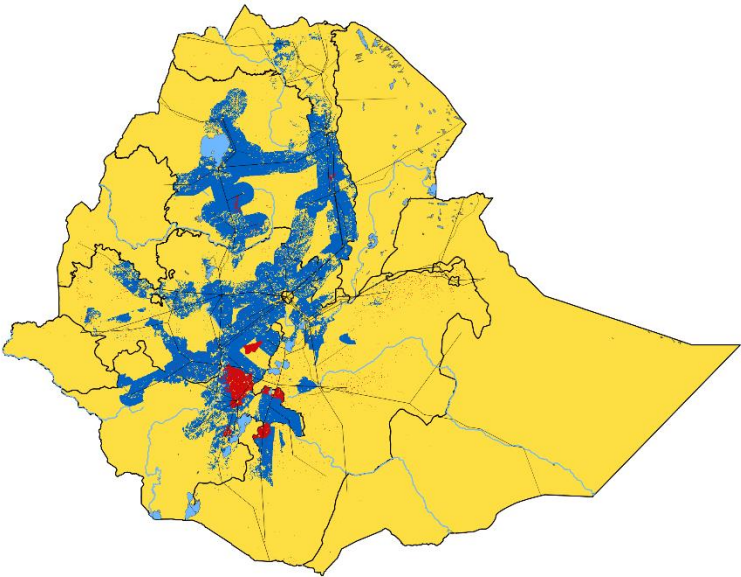

Electrification options of Ethiopian regions

- Electrification option
- Solar Home System
  - Mini-Grid
  - Grid Extension

- Power Grid
- River and Lake

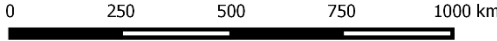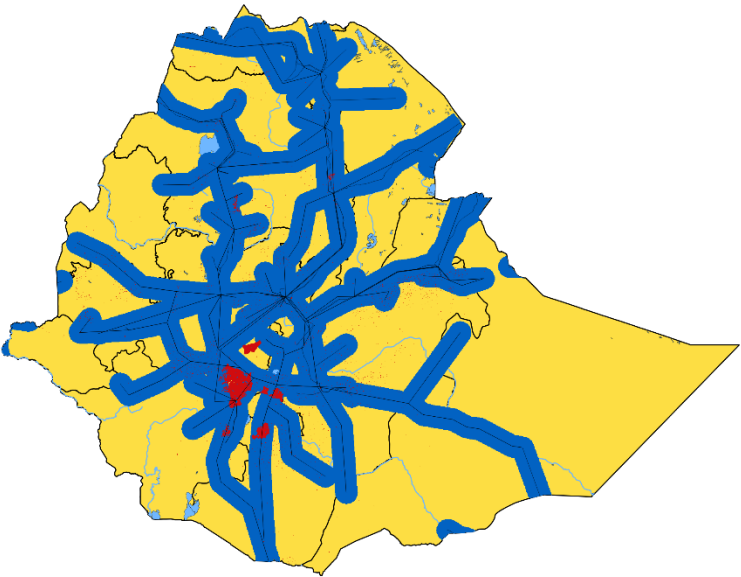

Share of electrification options in all Ethiopian regions

SHS (%) Mini-Grid (%) Grid (%)

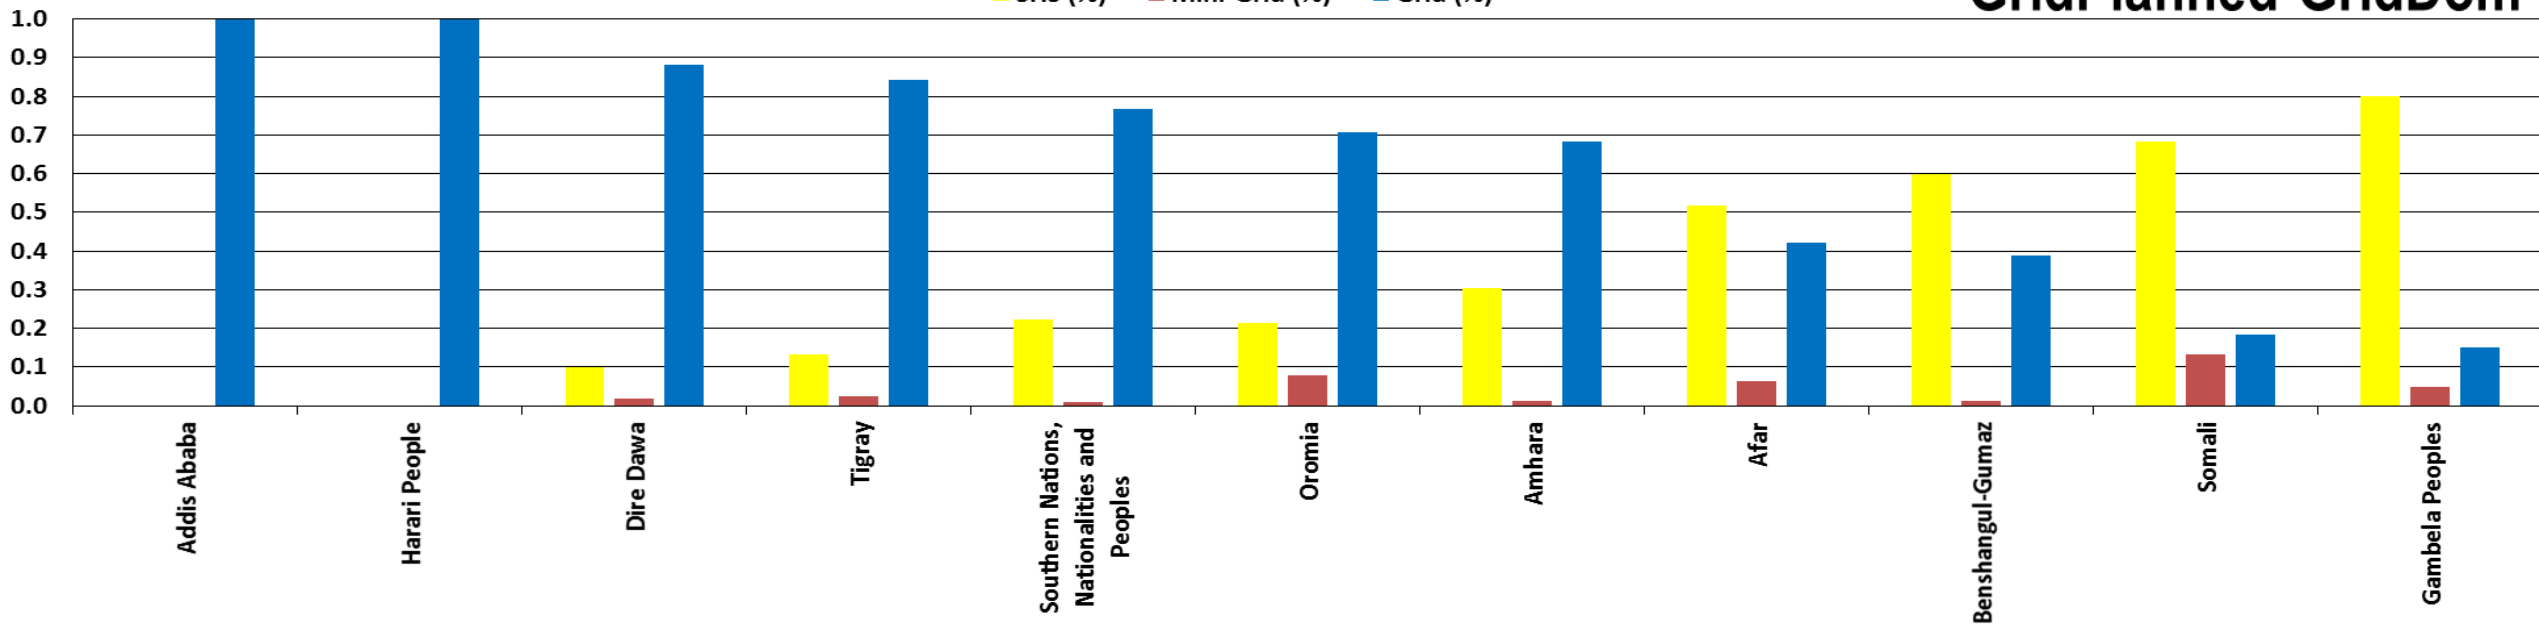

Share of electrification options in all Ethiopian regions

SHS (%) Mini-Grid (%) Grid (%)

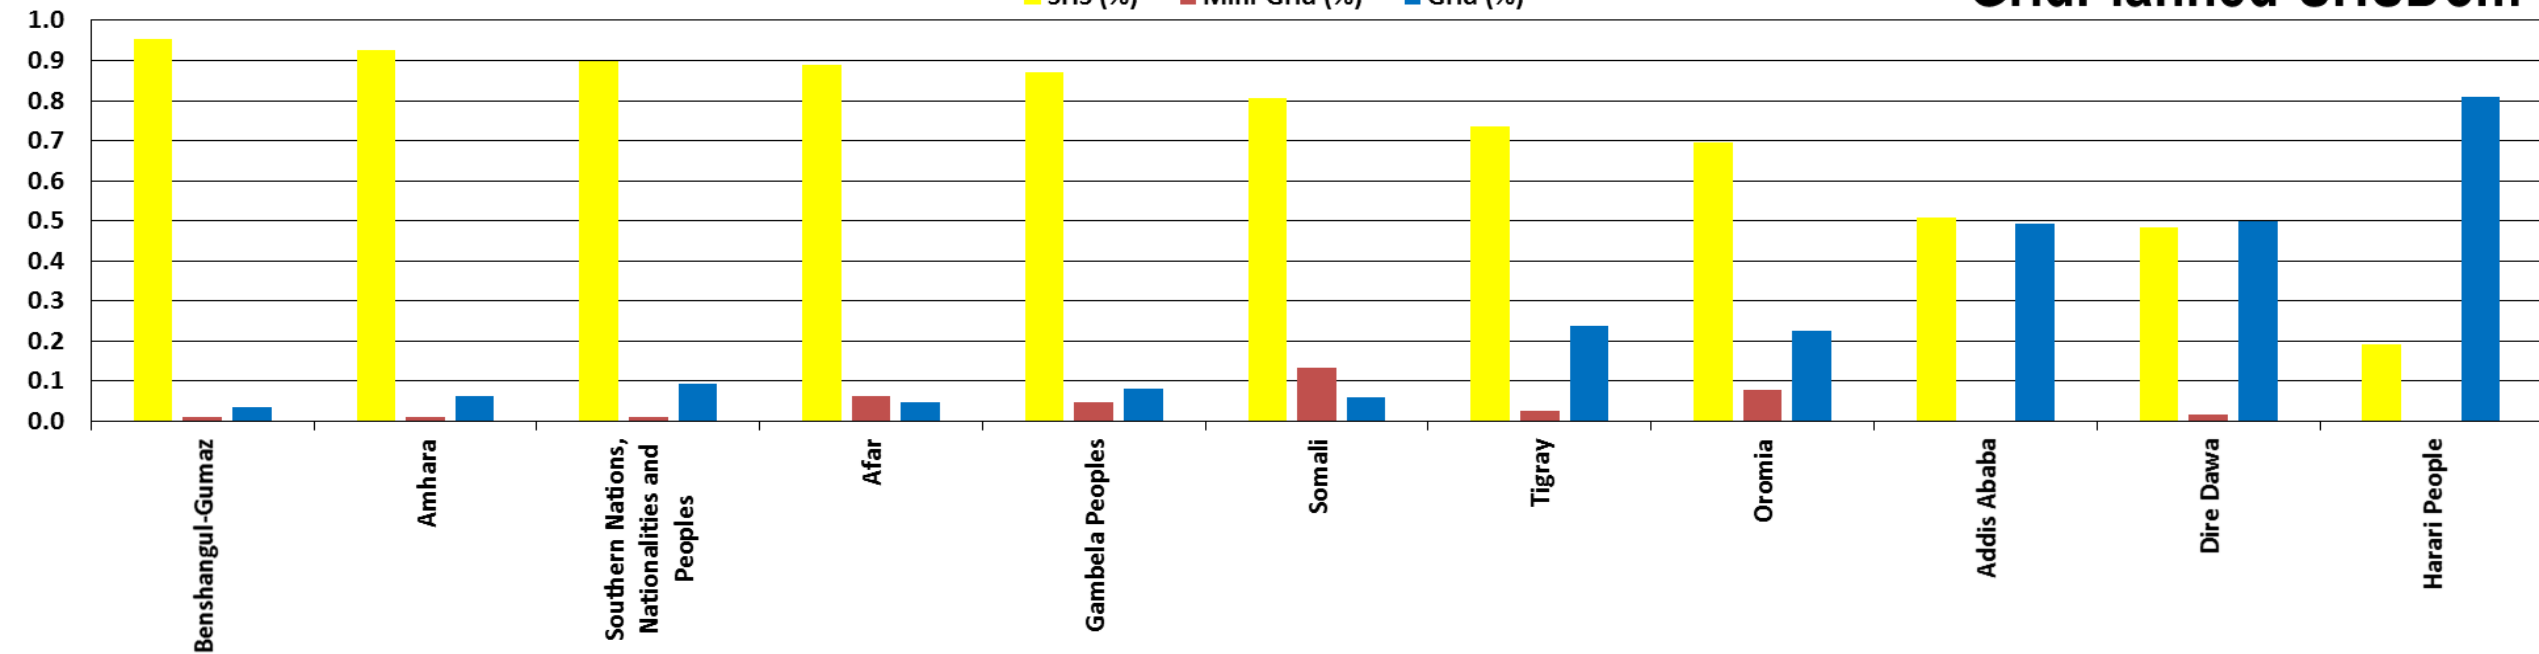

# Kenya

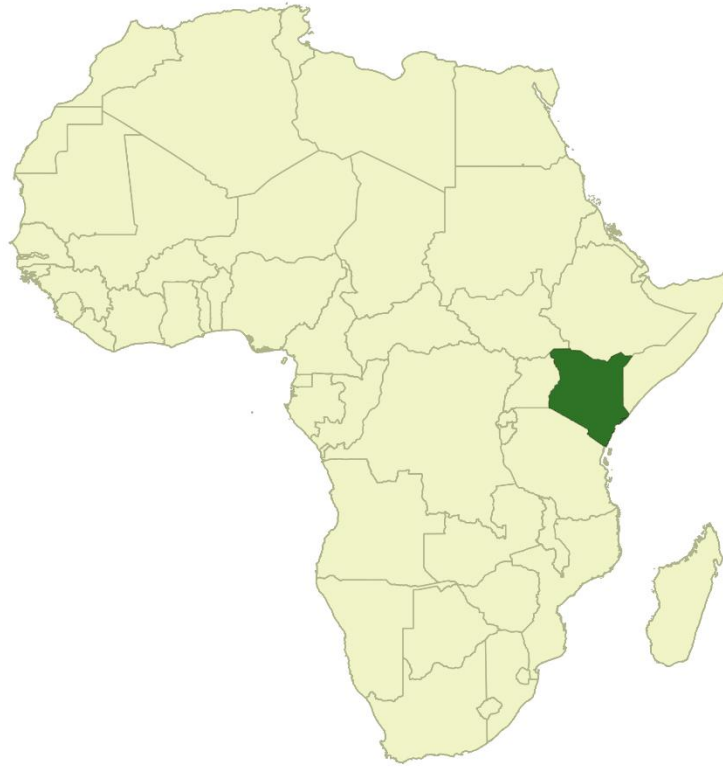

# Night light emission and Population of Kenyan regions

## Night light emission in Kenya

Detected night lights

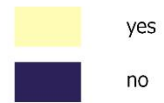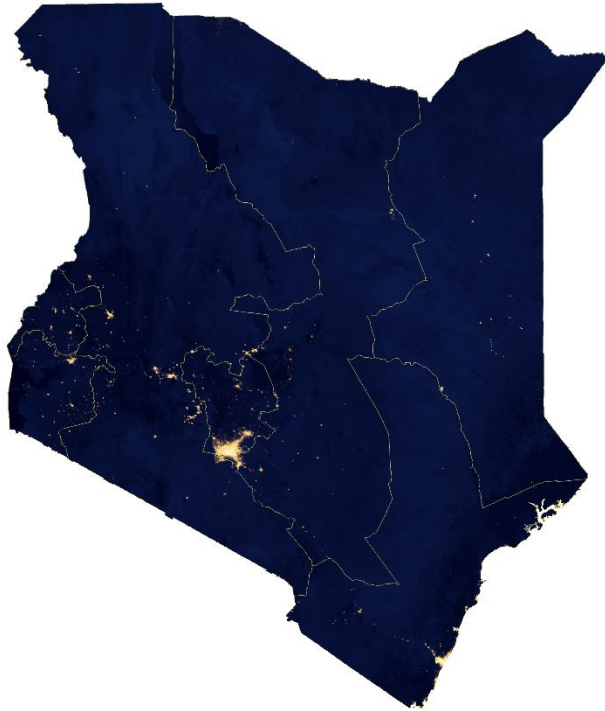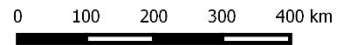

## Population structure of Kenya

Population density (people/750x750m<sup>2</sup>)

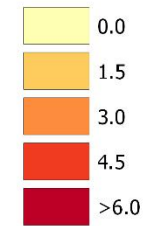

River and Lake (blue)

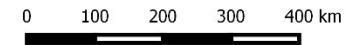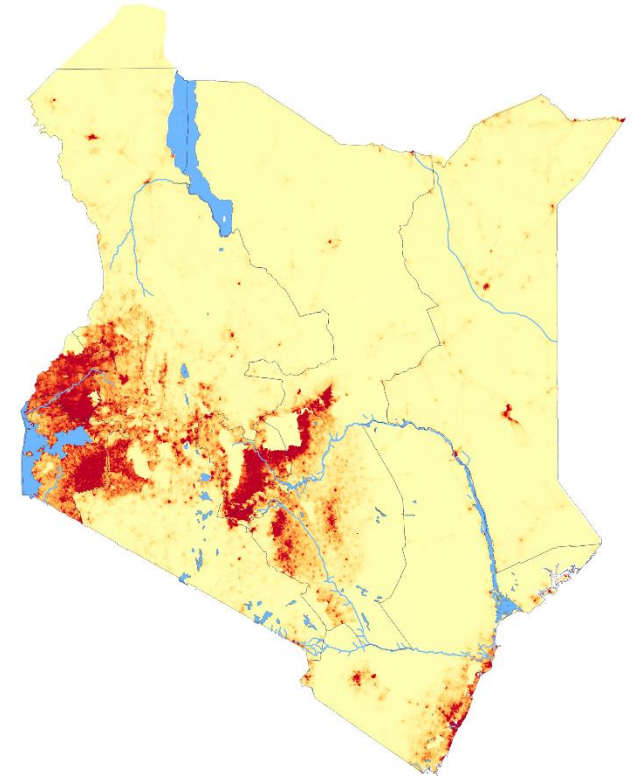

# Electrification option in all Kenyan regions: GridBuilt-GridDom

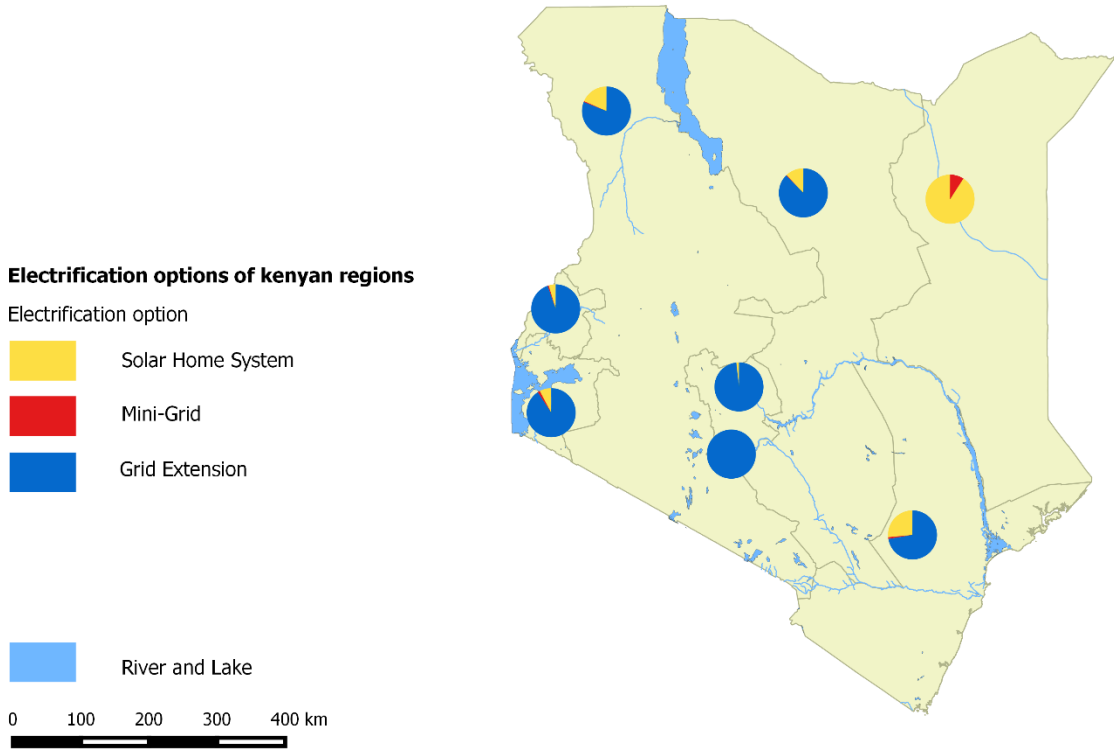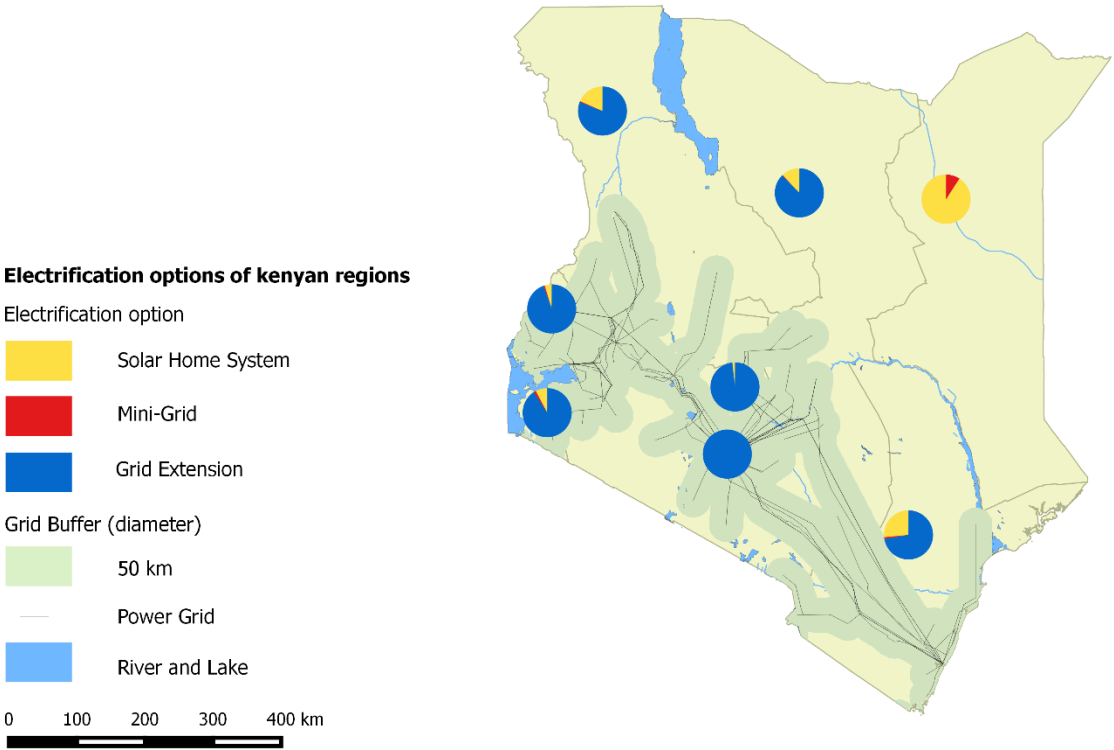

# Electrification option in all Kenyan regions: GridBuilt-SHSDom

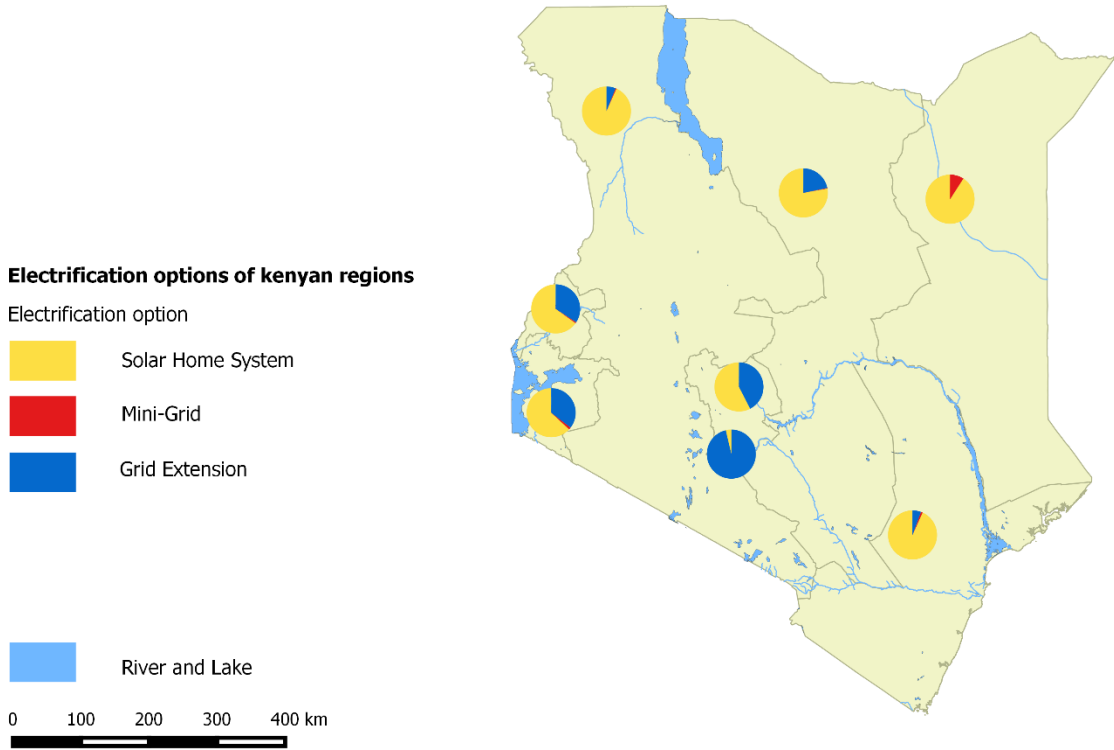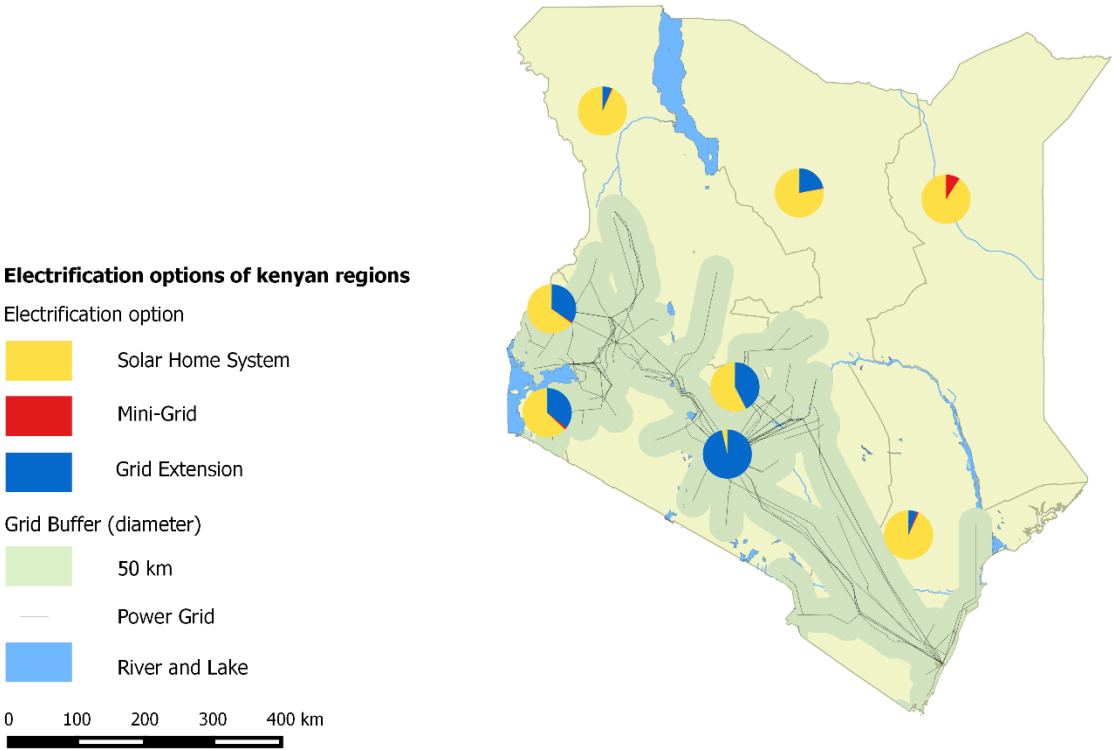

# Electrification option: GridBuilt-SHSDom

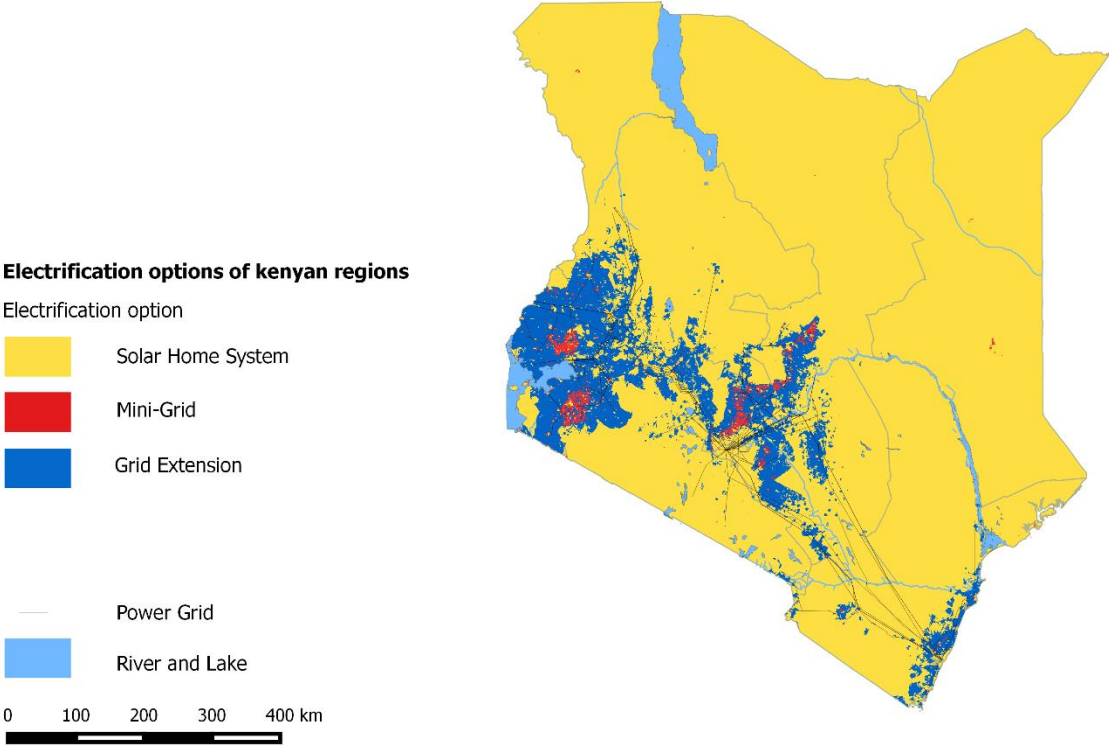

# Electrification option: GridBuilt-GridDom

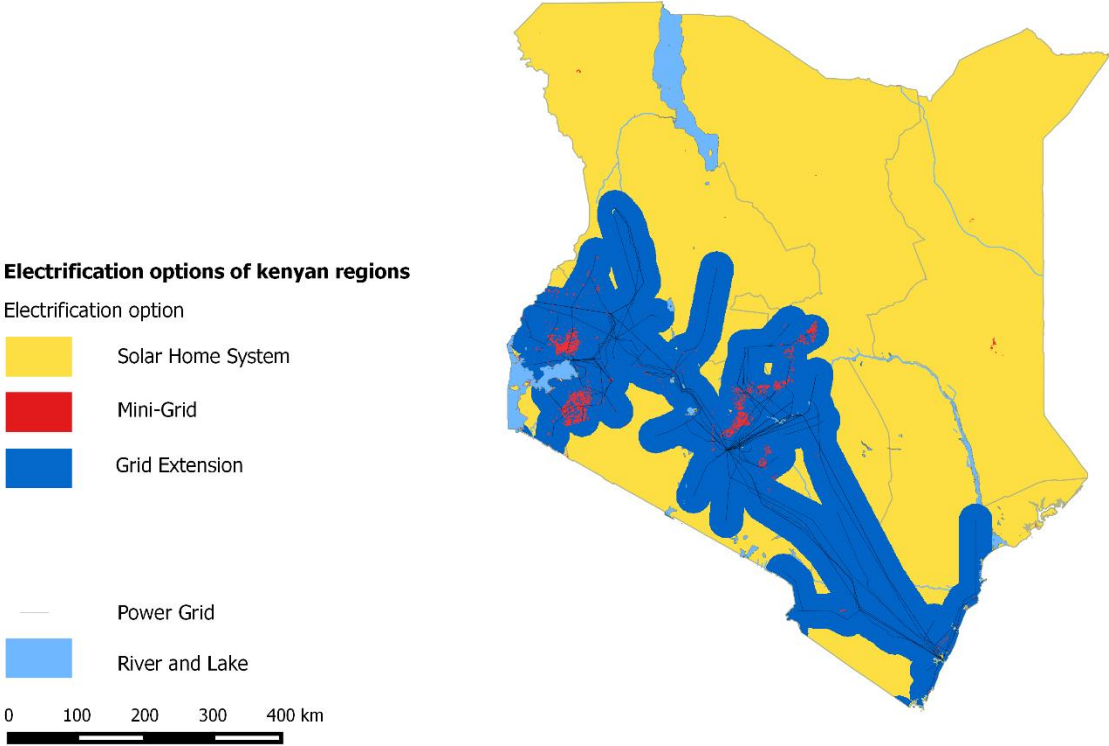

Share of electrification options in all Kenyan regions

SHS (%) Mini-Grid (%) Grid (%)

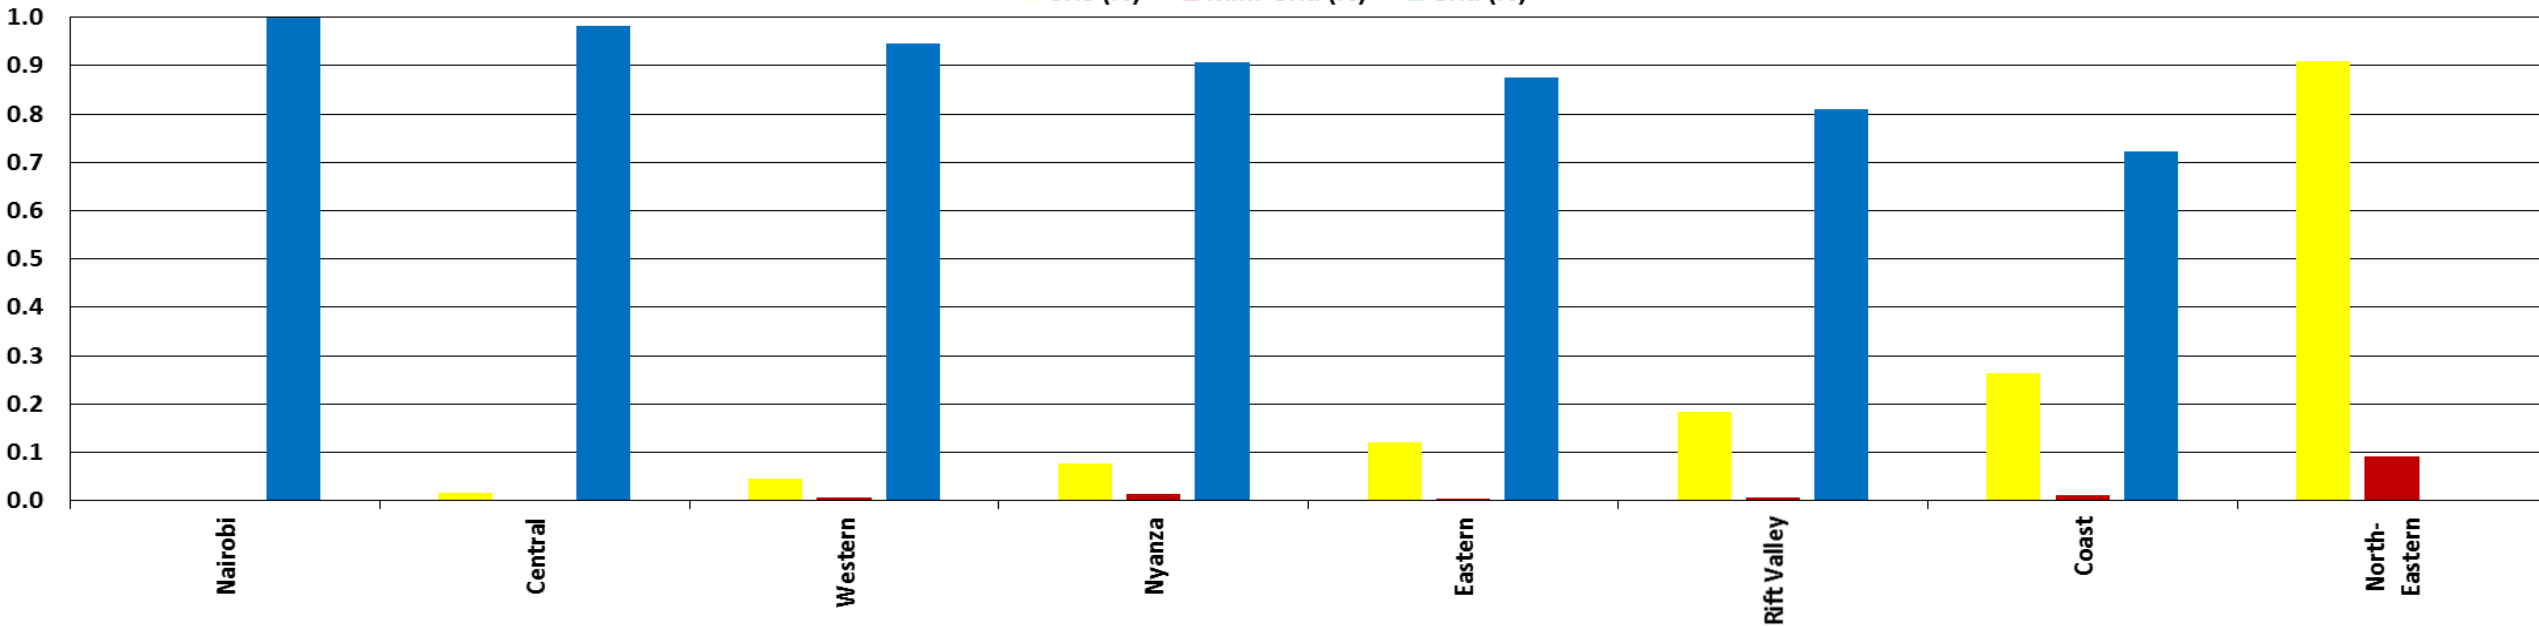

Share of electrification options in all Kenyan regions

SHS (%) Mini-Grid (%) Grid (%)

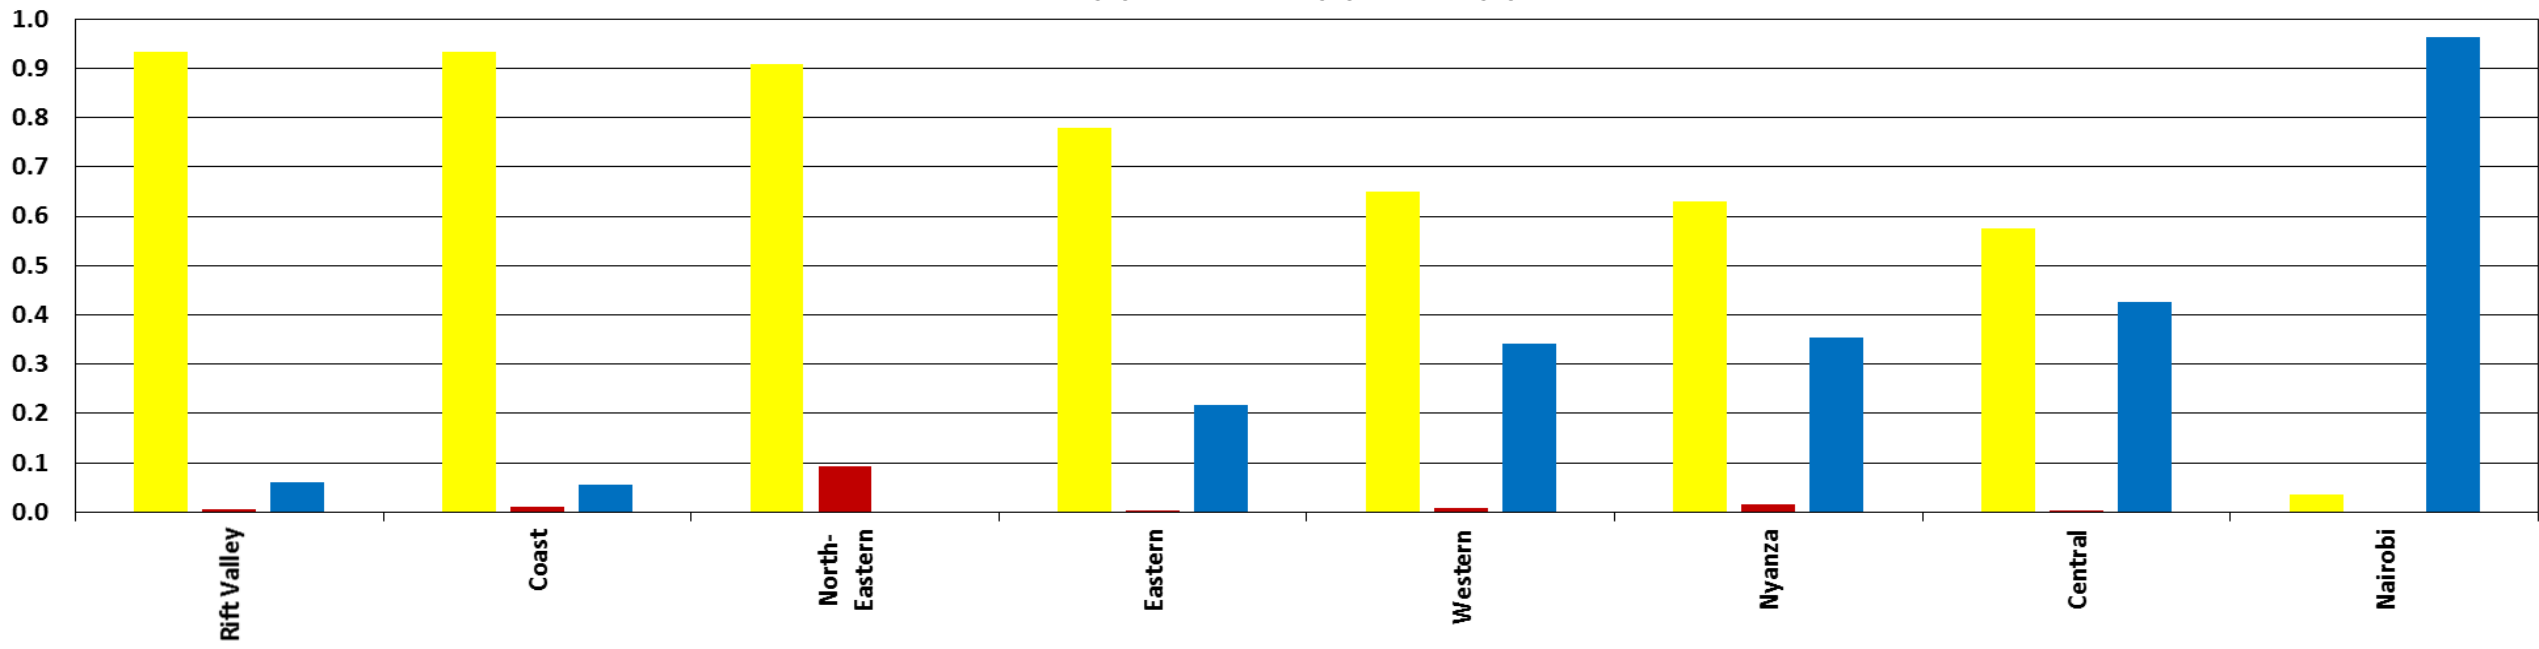

# Electrification option in all Kenyan regions: GridPlanned-GridDom

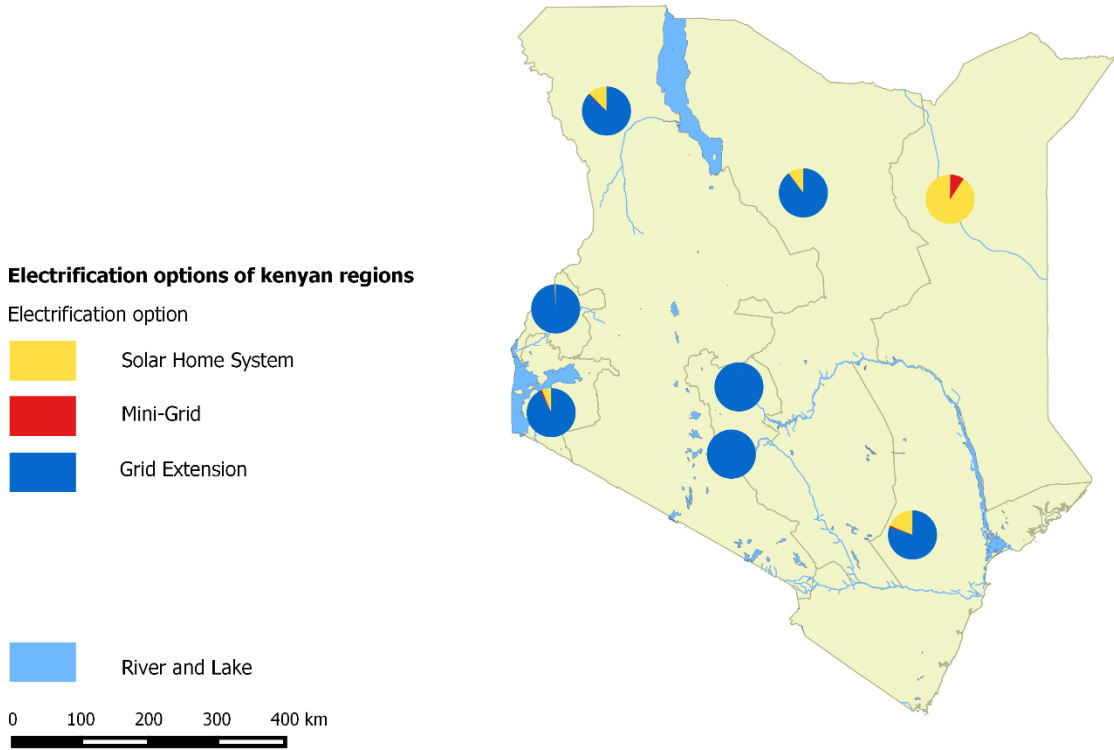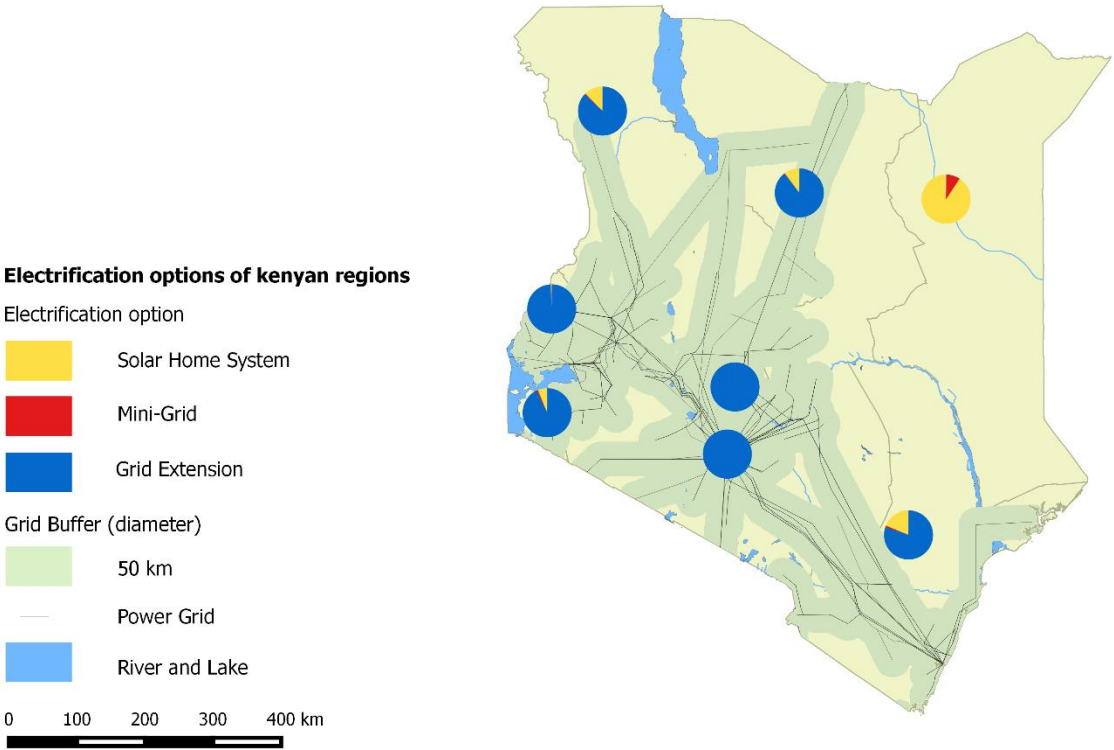

# Electrification option in all Kenyan regions: GridPlanned-SHSDom

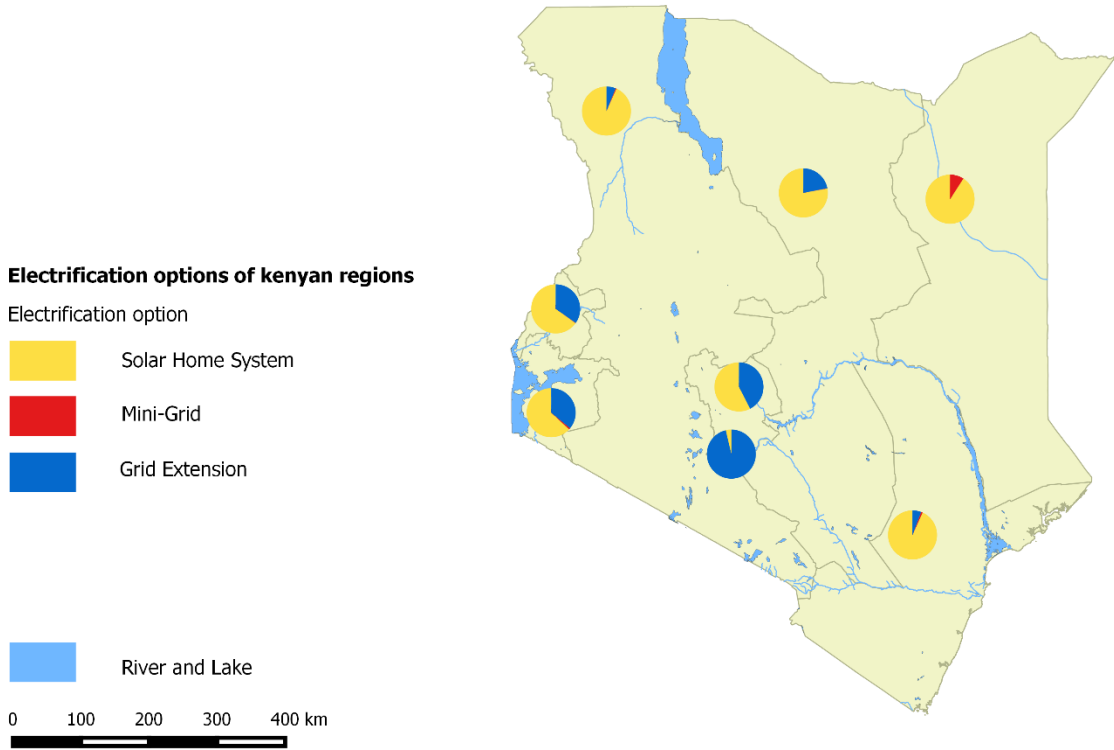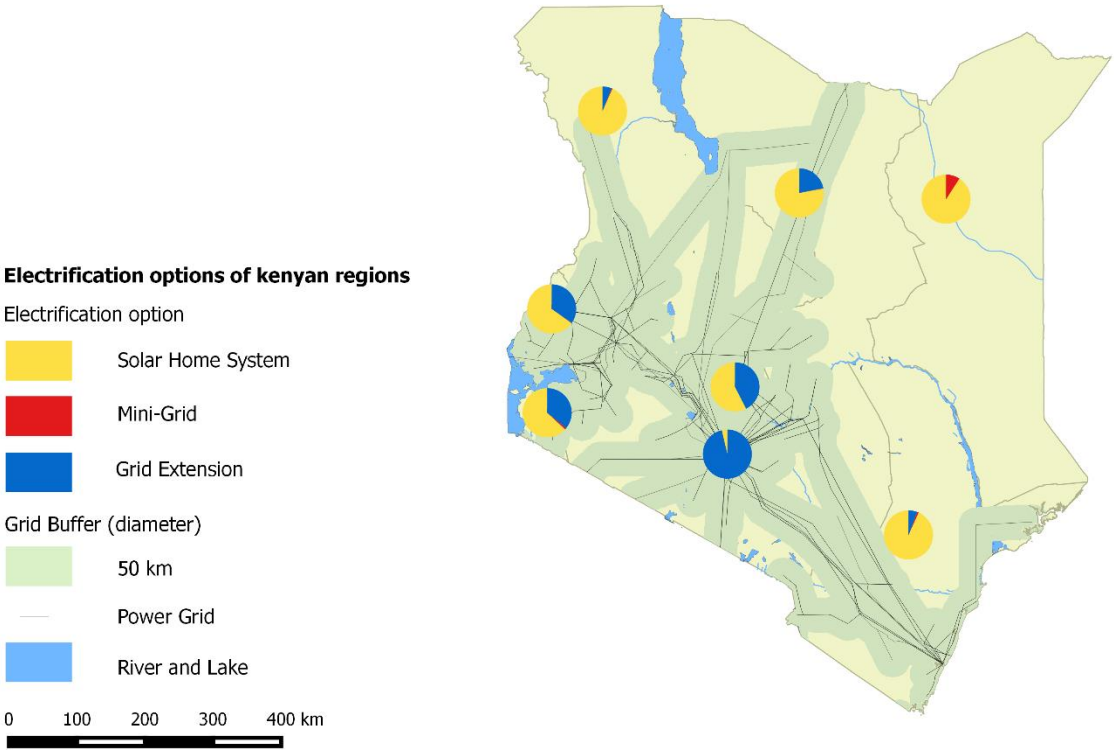

# Electrification option: GridPlanned-SHSDom

Electrification options of kenyan regions

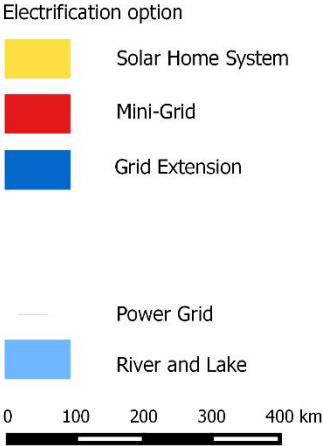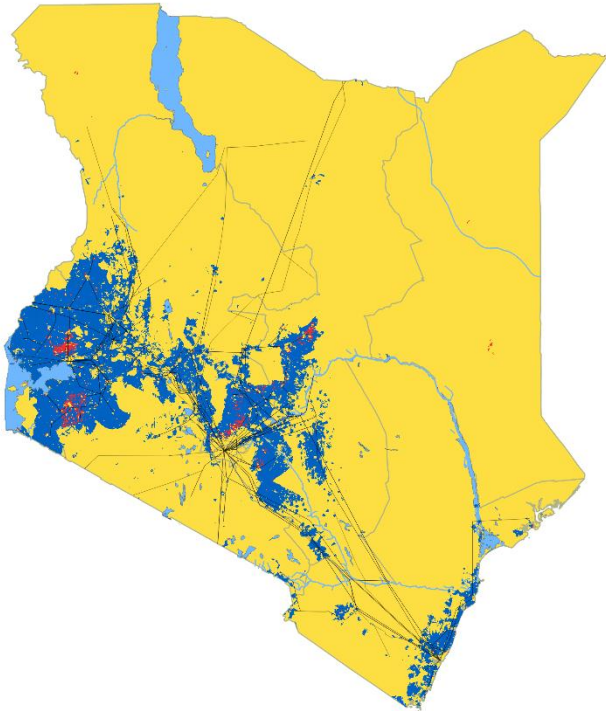

# Electrification option: GridPlanned-GridDom

Electrification options of kenyan regions

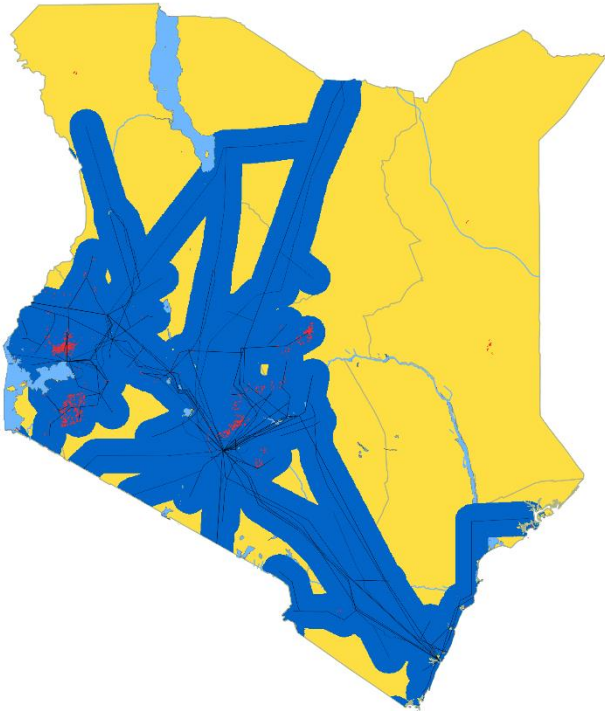

Share of electrification options in all Kenyan regions

SHS (%) Mini-Grid (%) Grid (%)

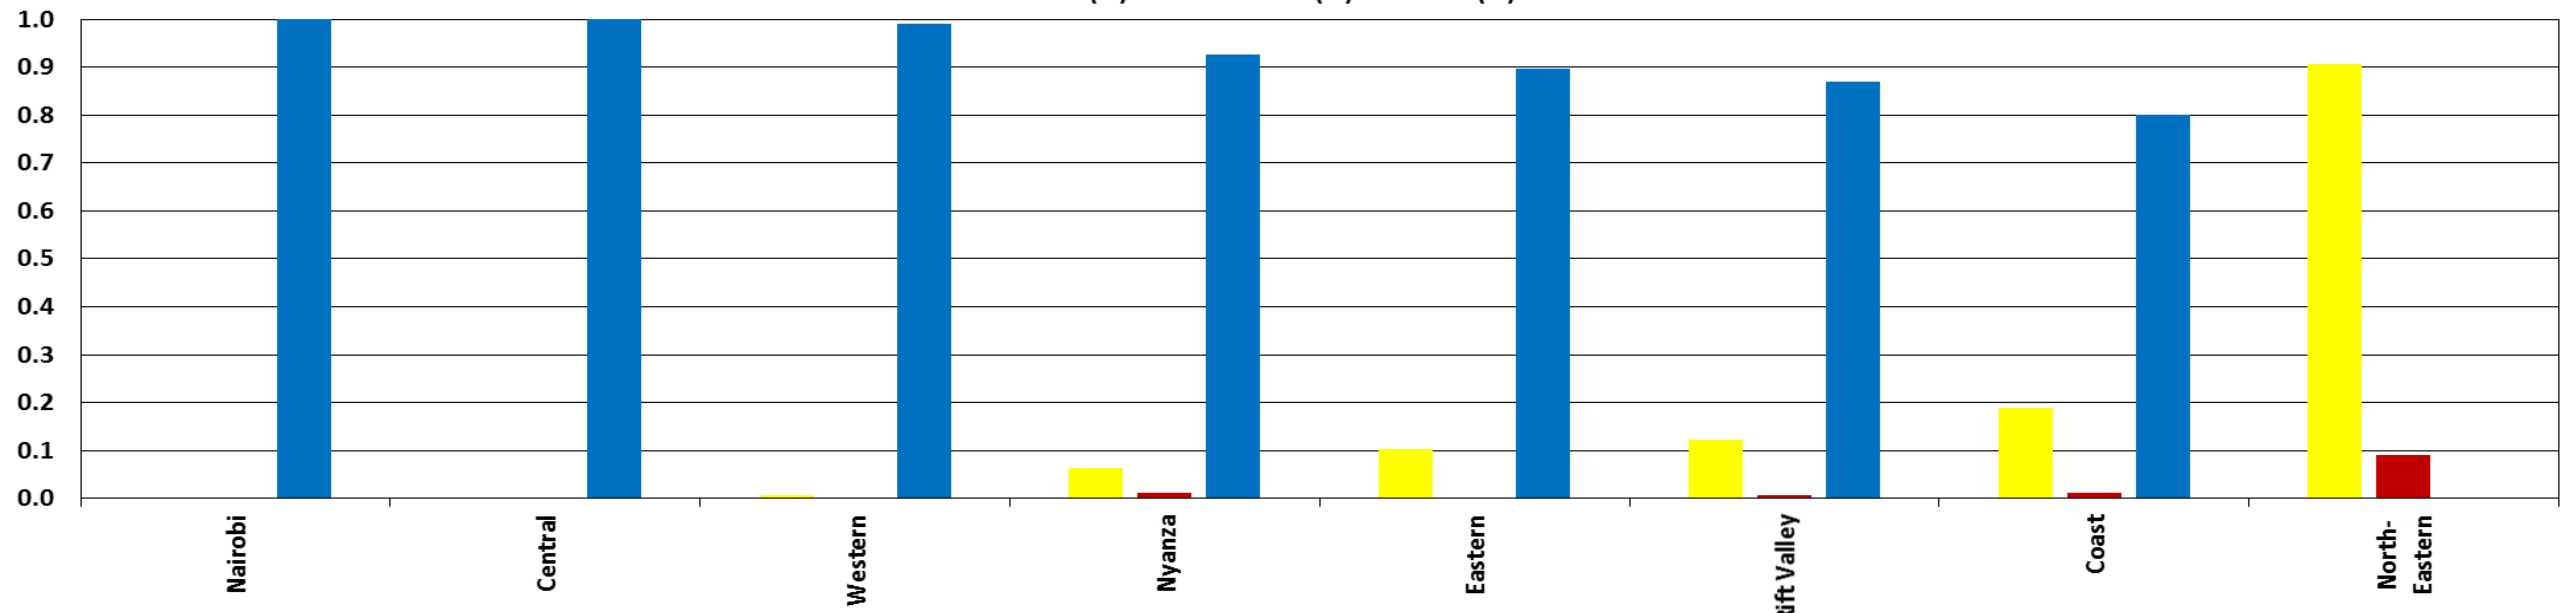

Share of electrification options in all Kenyan regions

SHS (%) Mini-Grid (%) Grid (%)

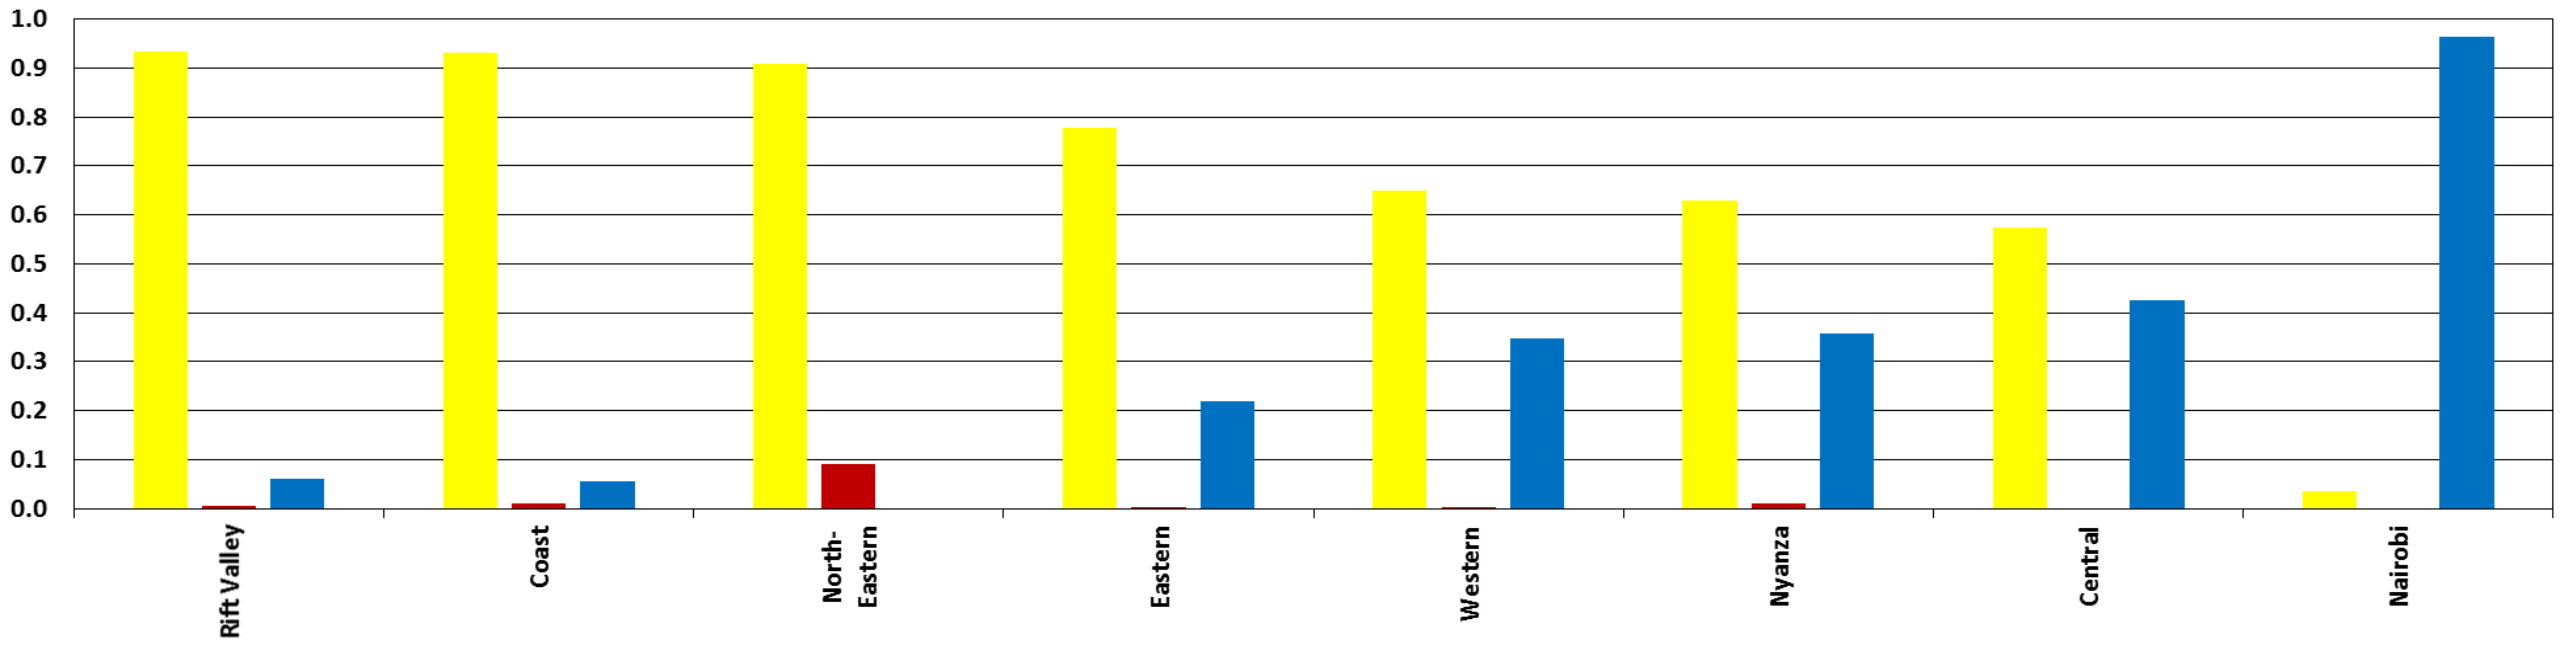

# Madagascar

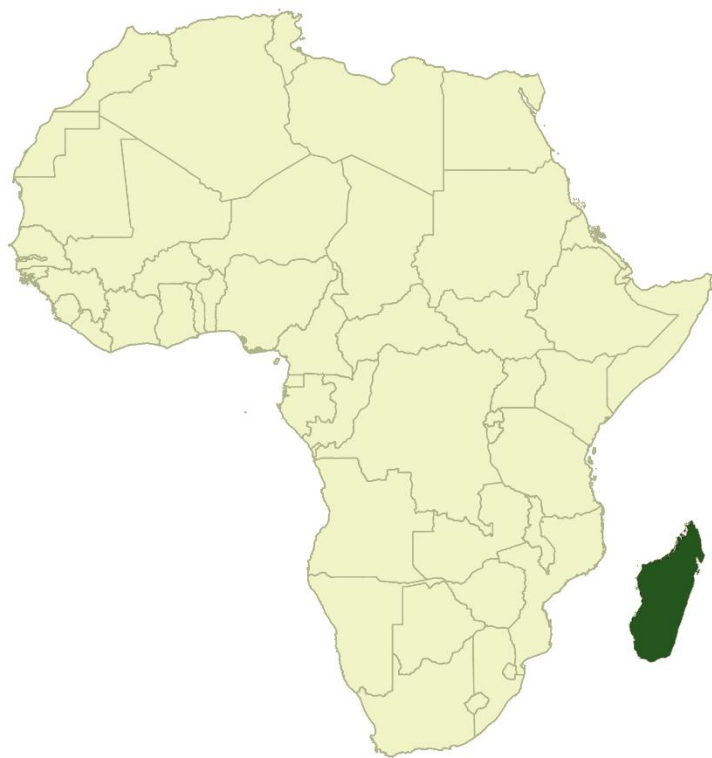

# Night light emission and Population of Malagasy regions

## Night light emission in Madagascar

Detected night lights

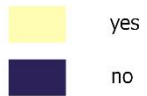

0 100 200 300 400 km

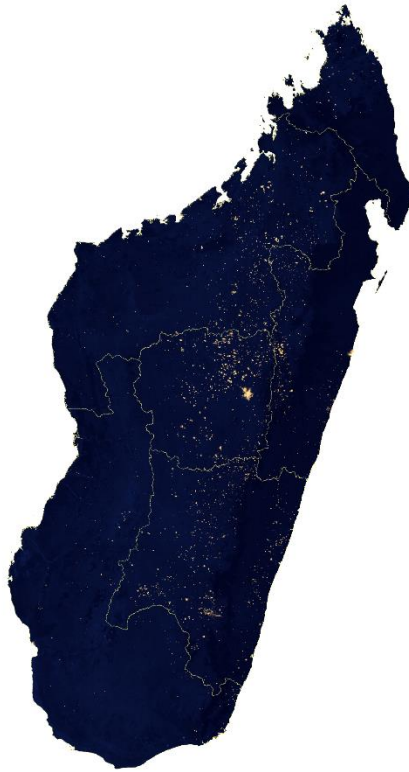

## Population structure of Madagascar

Population density (people/750x750m<sup>2</sup>)

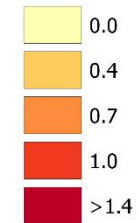

River and Lake (blue)

0 100 200 300 400 km

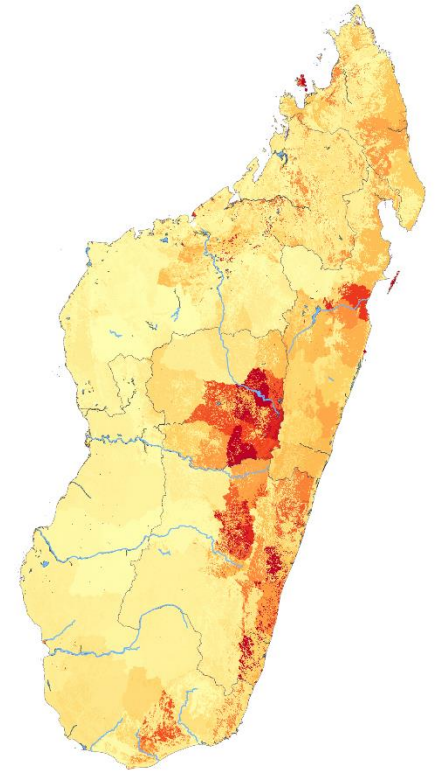

# Electrification option in all Malagasy regions: GridBuilt-GridDom

## Electrification options of Malagasy regions

Electrification option

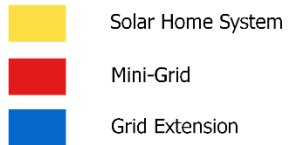

River and Lake (Blue)

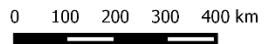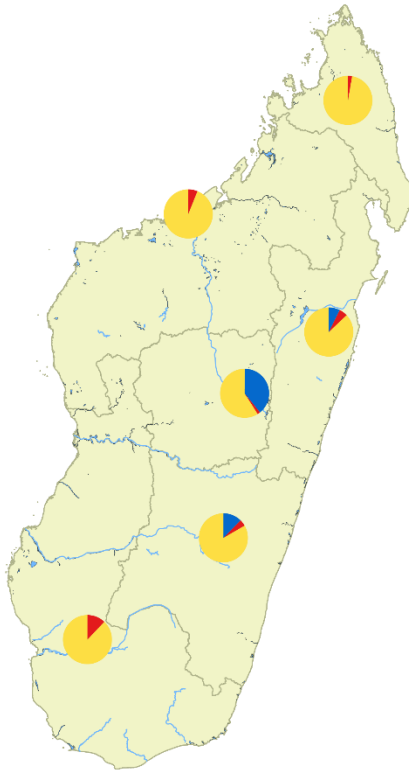

## Electrification options of Malagasy regions

Electrification option

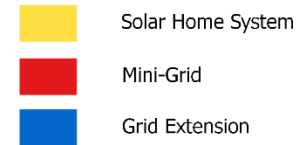

Grid Buffer (diameter)

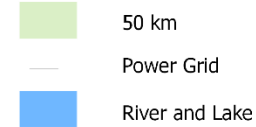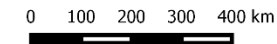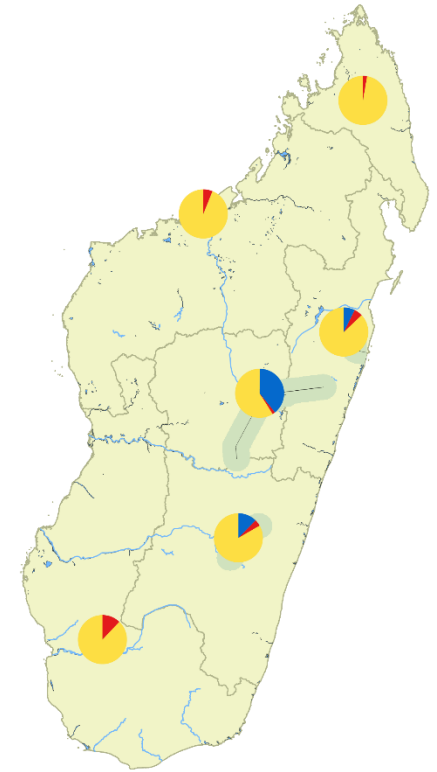

# Electrification option in all Malagasy regions: GridBuilt-SHSDom

## Electrification options of Malagasy regions

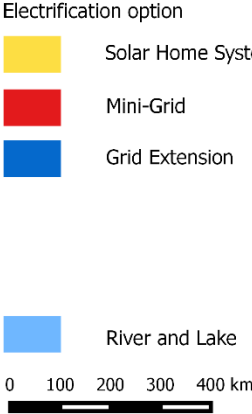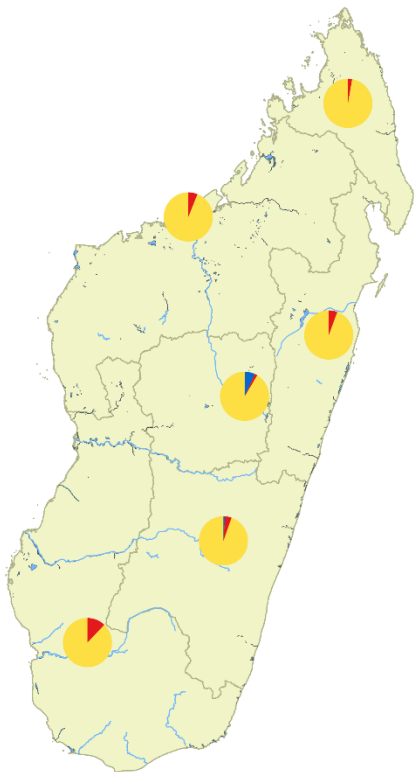

## Electrification options of Malagasy regions

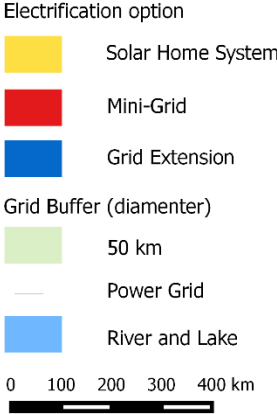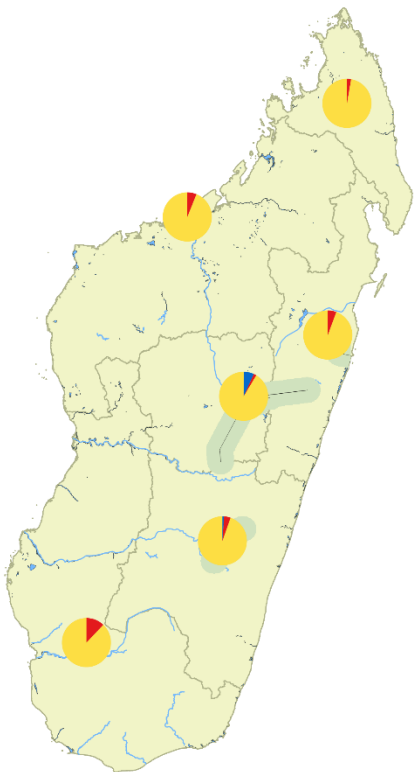

# Electrification option: GridBuilt-SHSDom

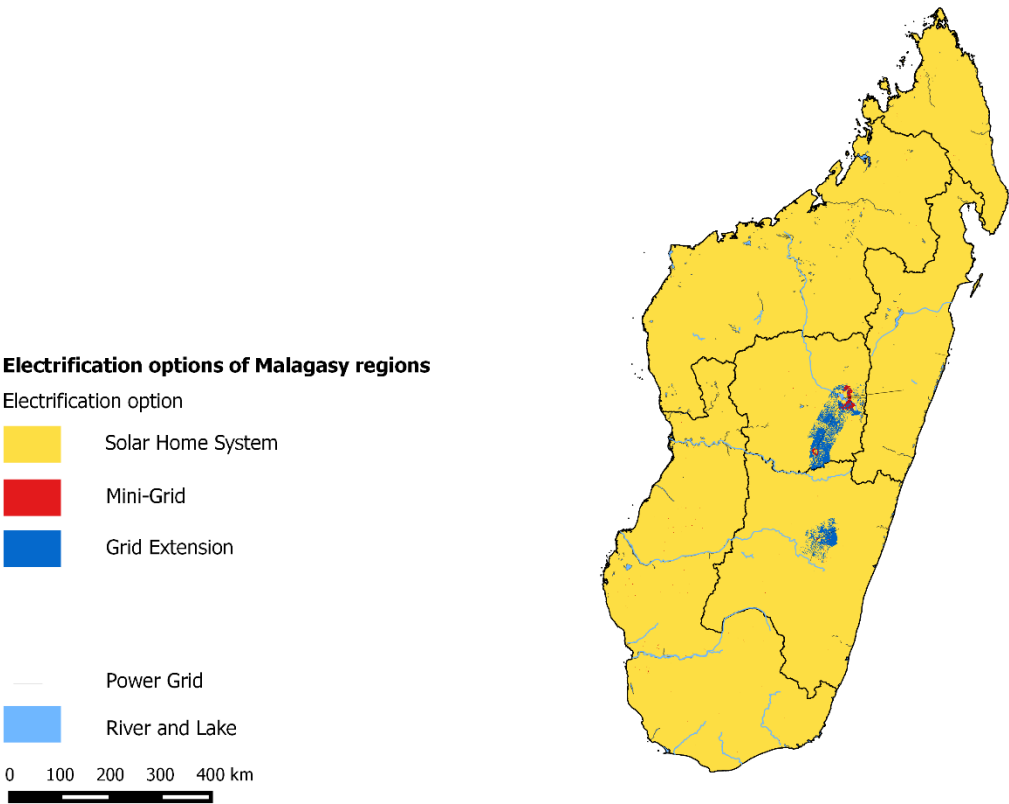

# Electrification option: GridBuilt-GridDom

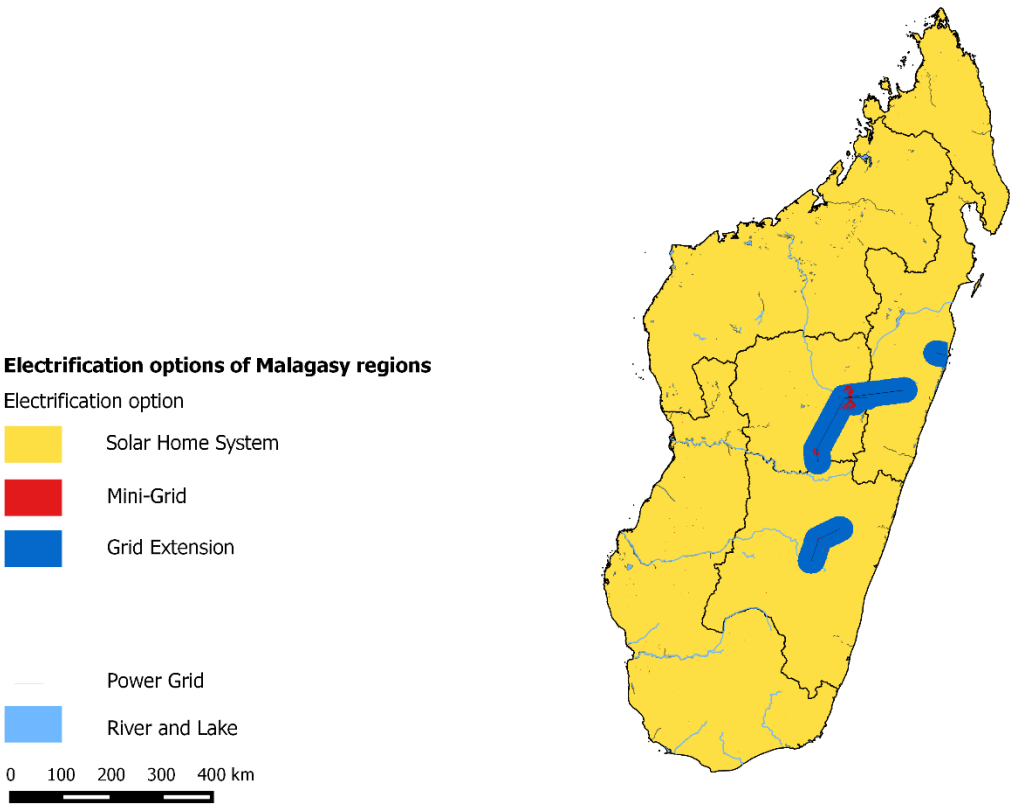

Share of electrification options in all Malagasy regions

SHS (%) Mini-Grid (%) Grid (%)

GridBuilt-GridDom

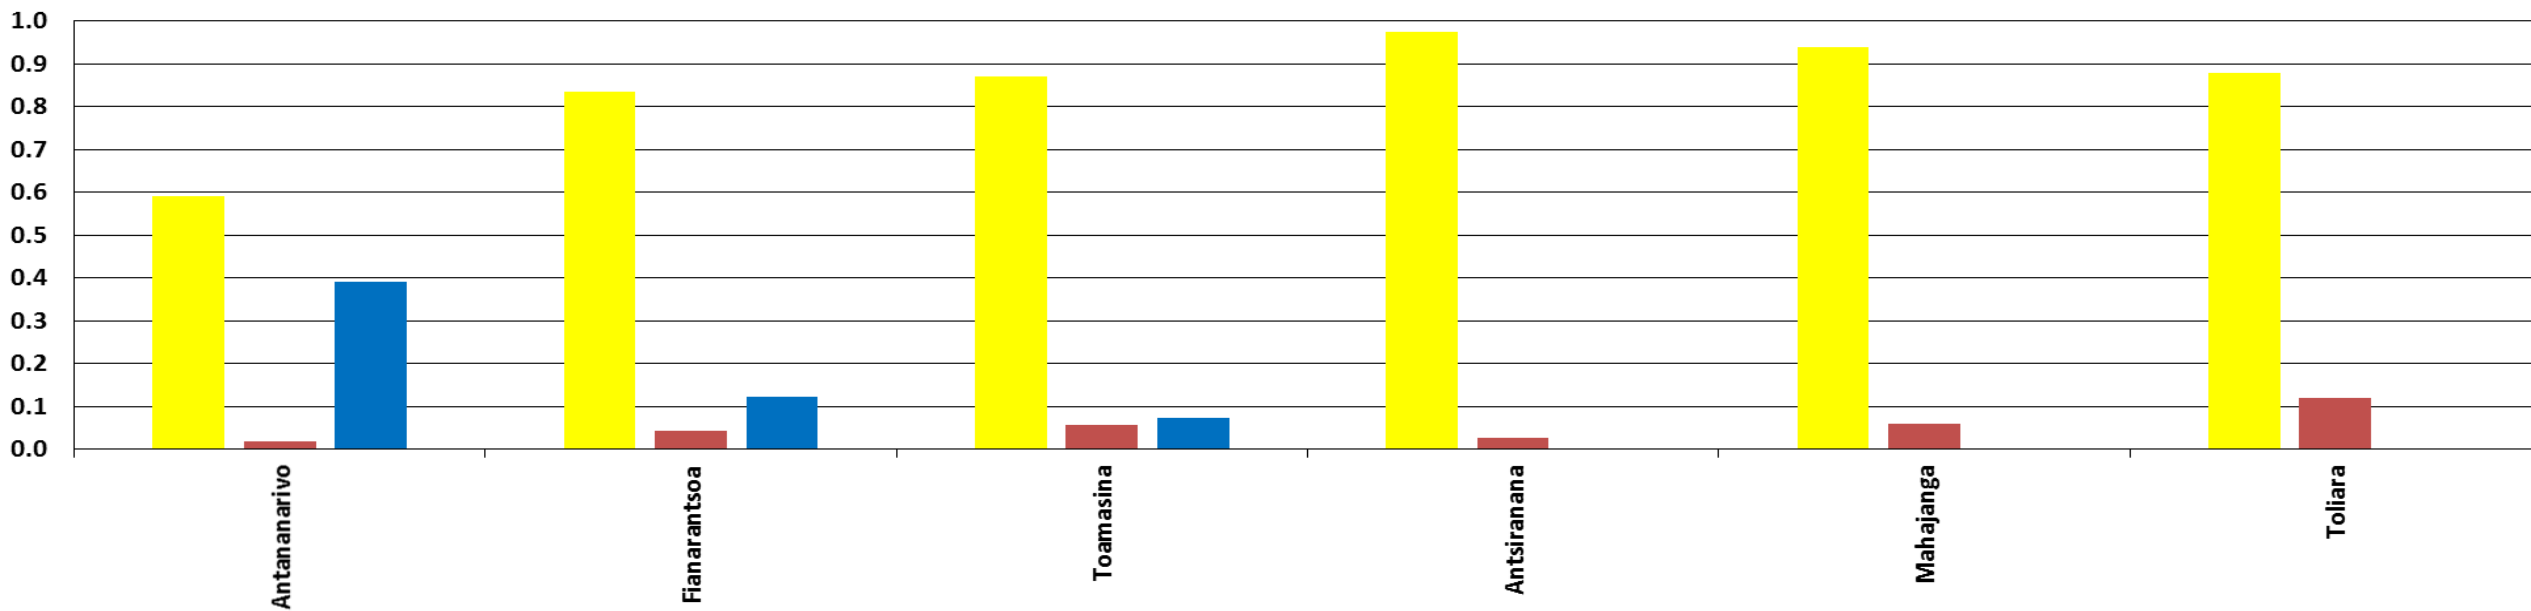

Share of electrification options in all Malagasy regions

SHS (%) Mini-Grid (%) Grid (%)

GridBuilt-SHSDom

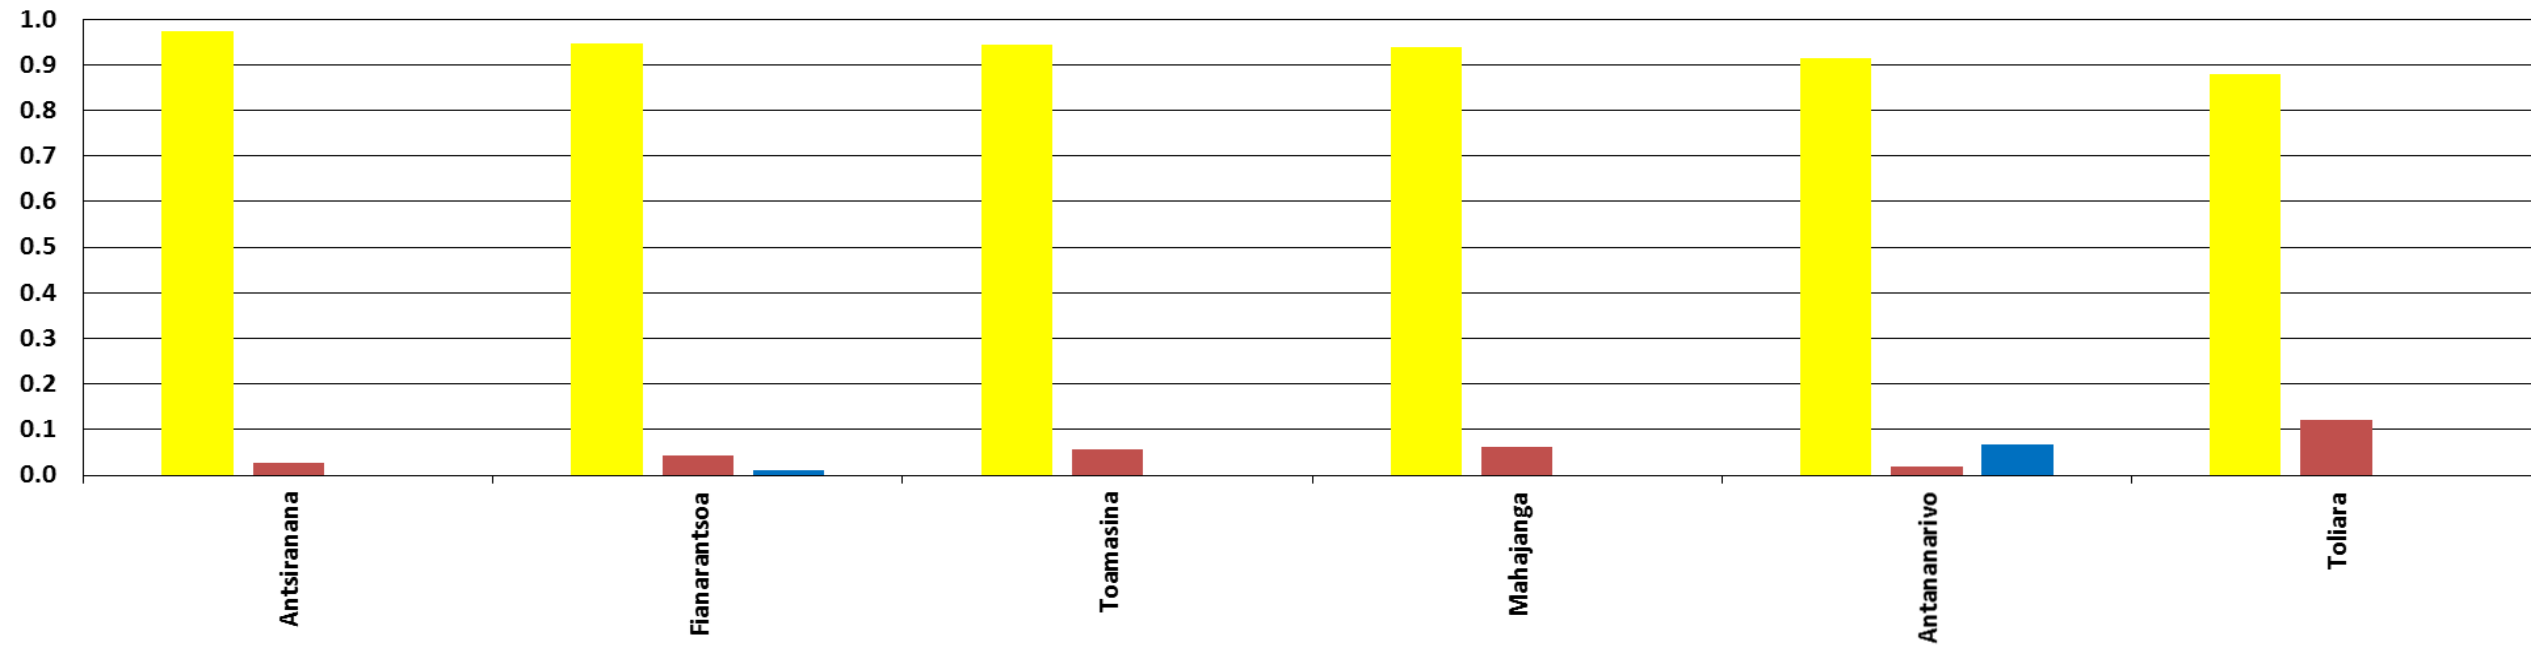

# Electrification option in all Malagasy regions: GridPlanned-GridDom

## Electrification options of Malagasy regions

Electrification option

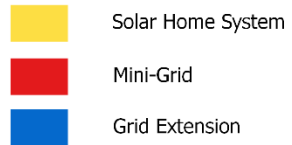

River and Lake

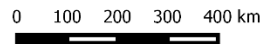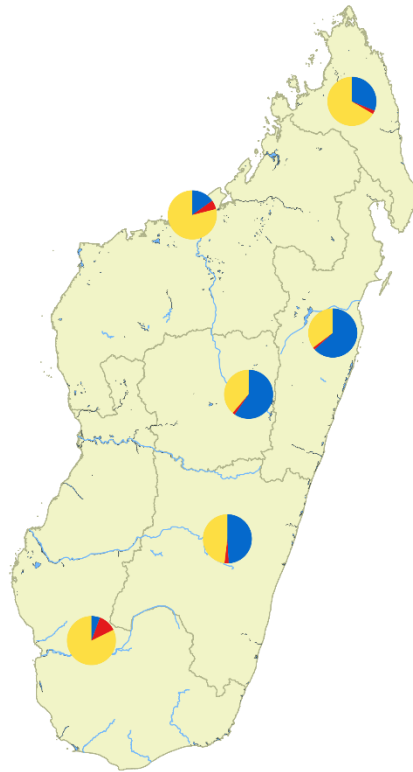

## Electrification options of Malagasy regions

Electrification option



Grid Buffer (diameter)

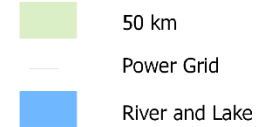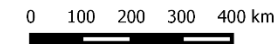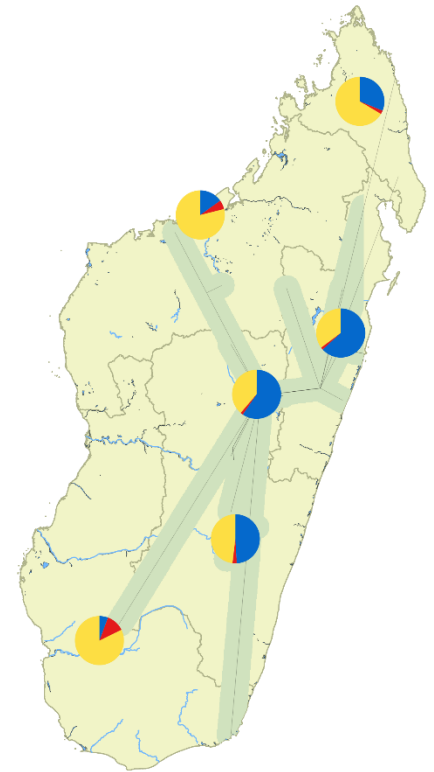

# Electrification option in all Malagasy regions: GridPlanned-SHSDom

## Electrification options of Malagasy regions

Electrification option



River and Lake

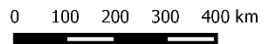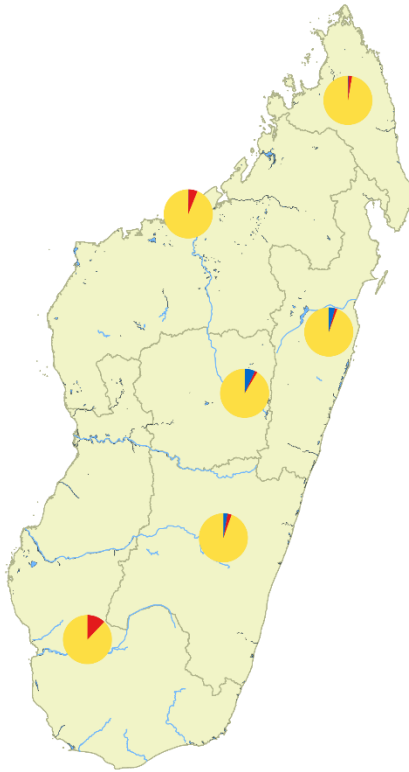

## Electrification options of Malagasy regions

Electrification option

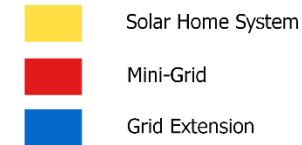

Grid Buffer (diameter)

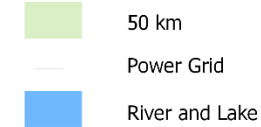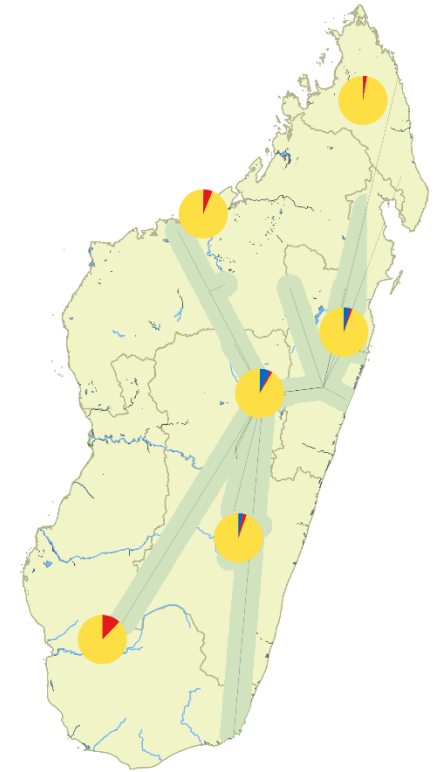

# Electrification option: GridPlanned-SHSDom

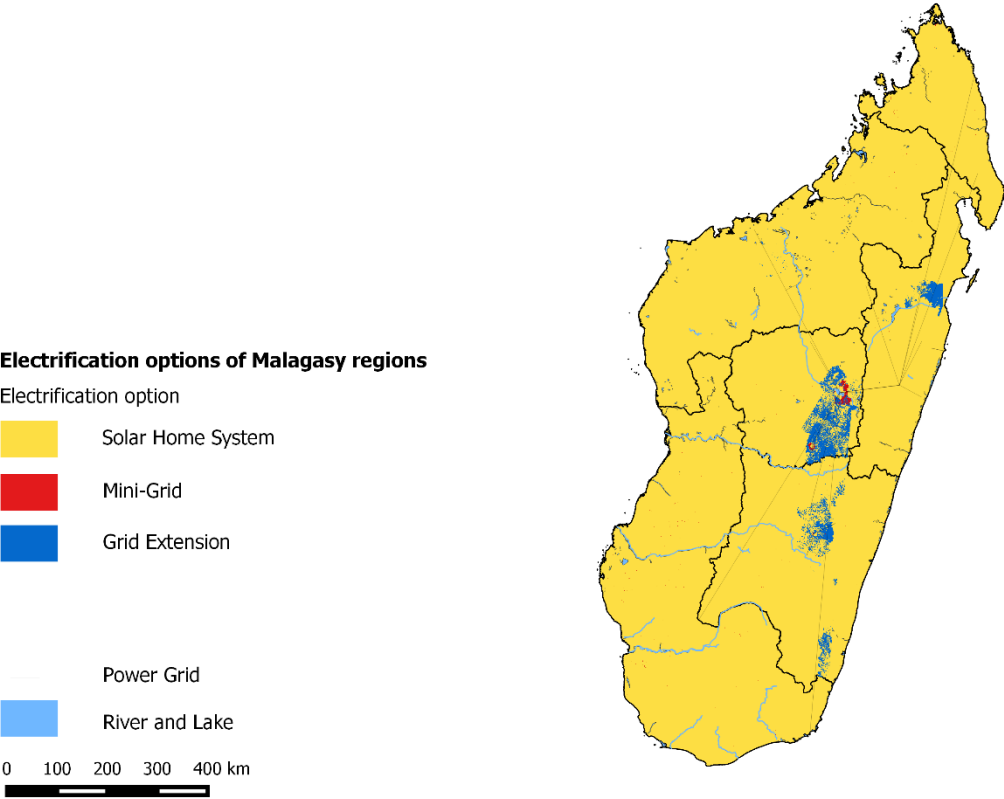

# Electrification option: GridPlanned-GridDom

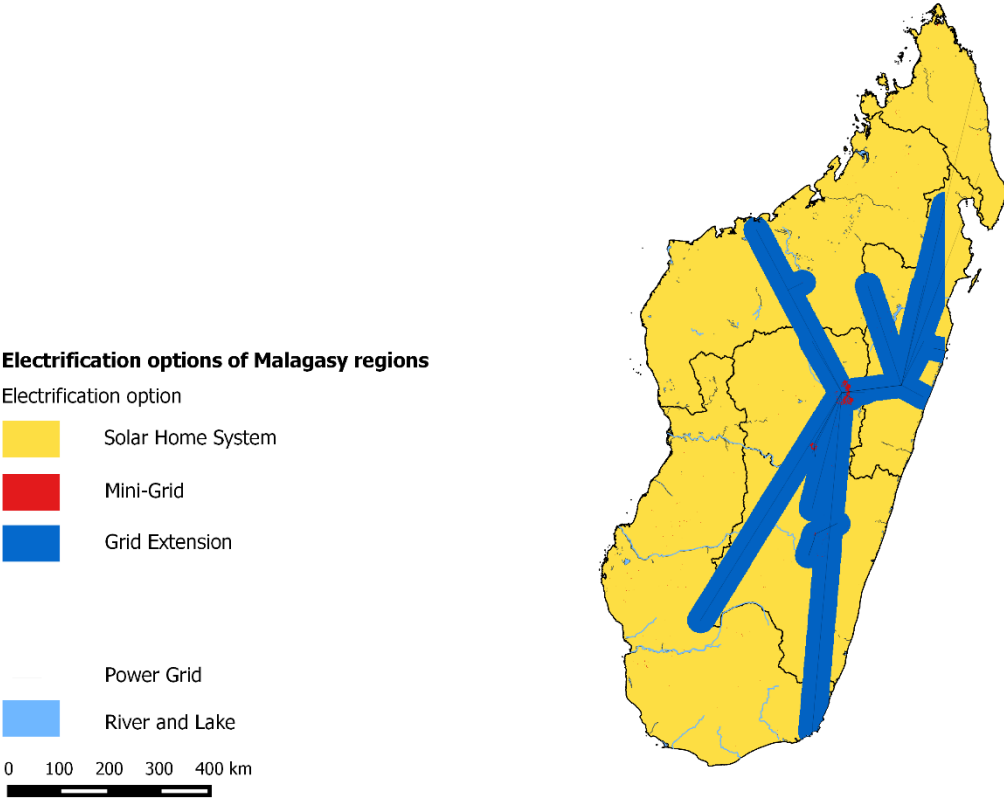

Share of electrification options in all Malagasy regions

SHS (%) Mini-Grid (%) Grid (%)

GridPlanned-GridDom

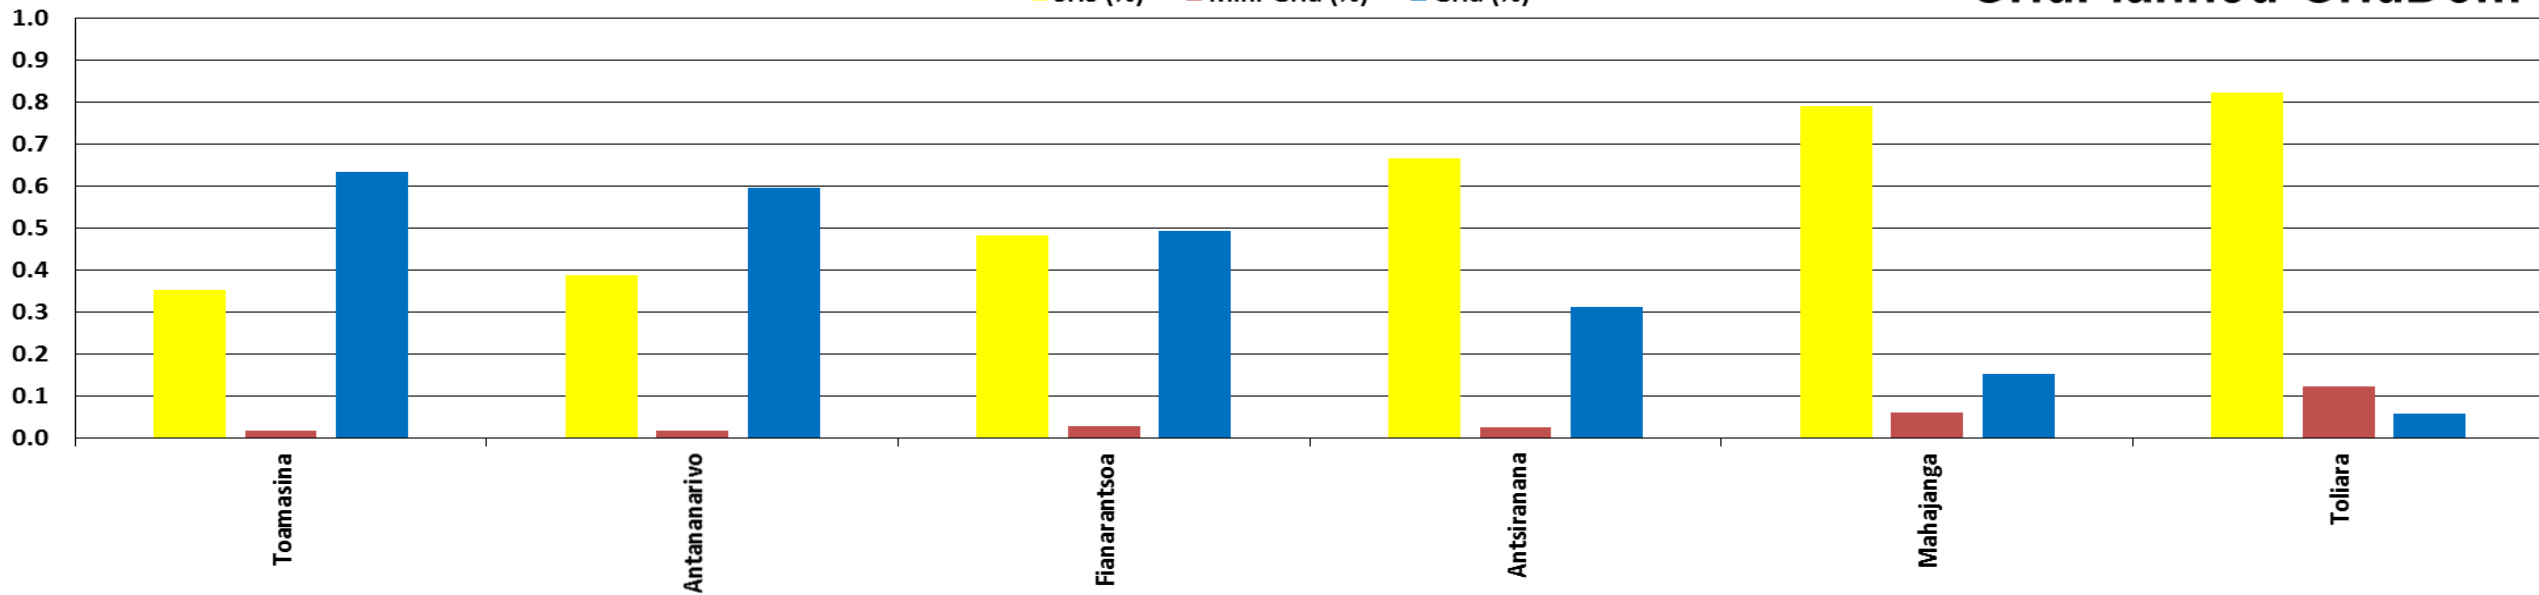

Share of electrification options in all Malagasy regions

SHS (%) Mini-Grid (%) Grid (%)

GridPlanned-SHSDom

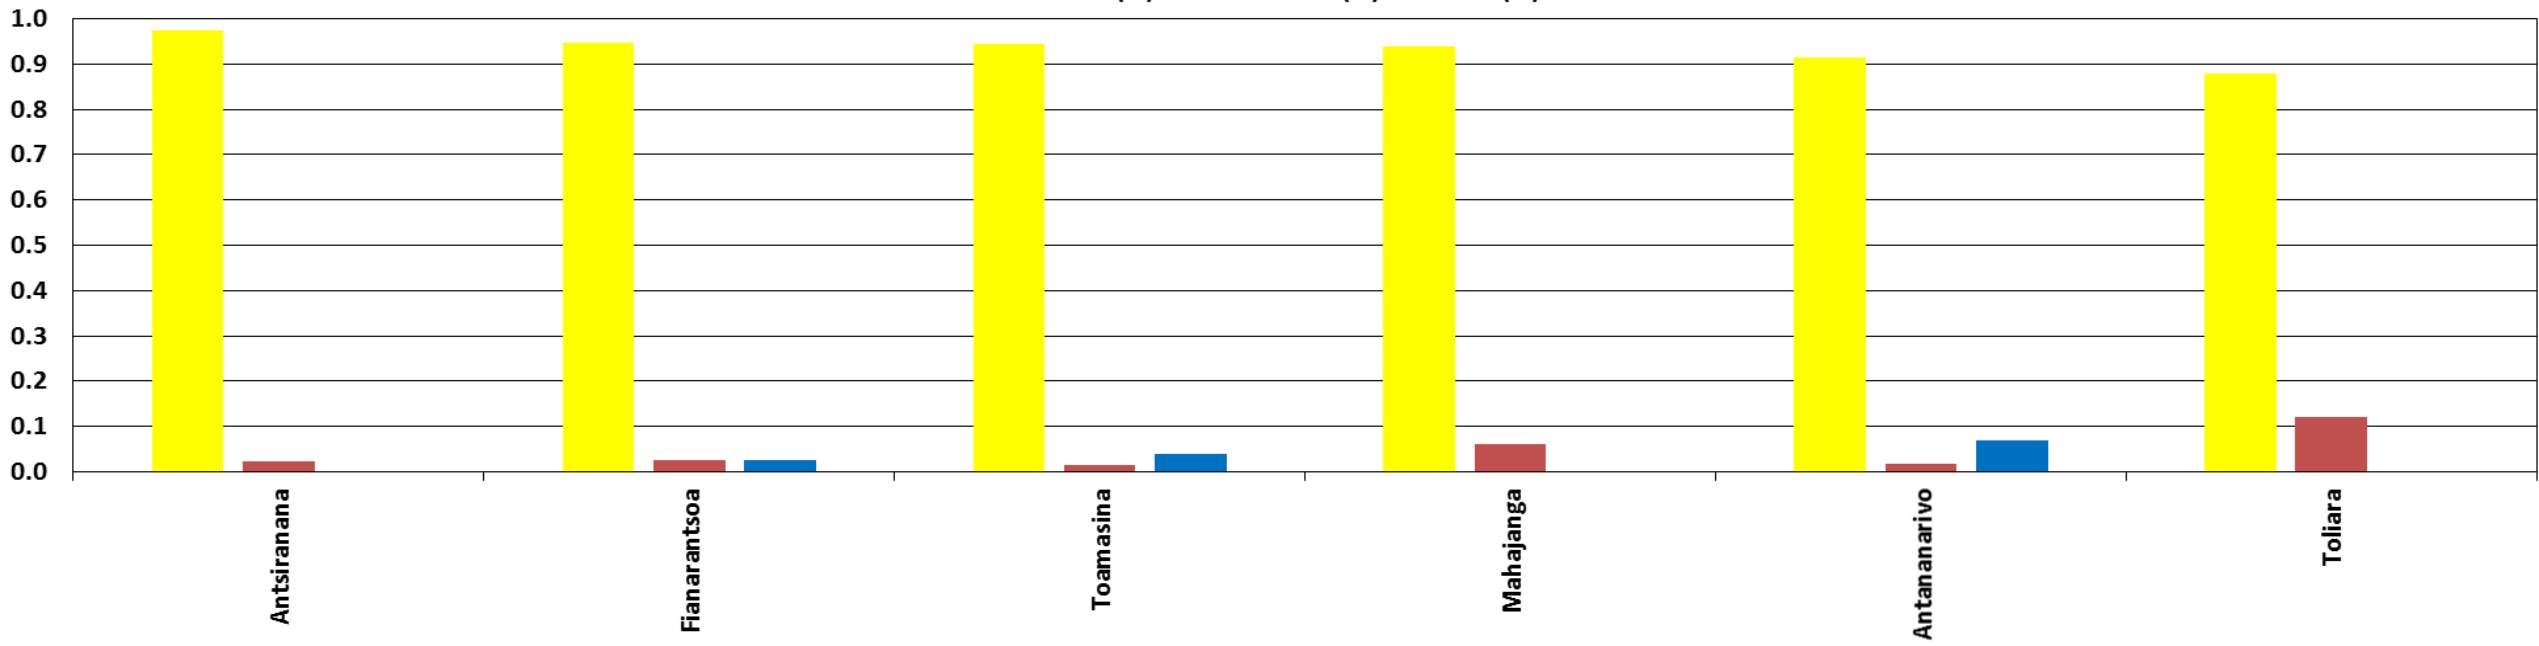

# Malawi

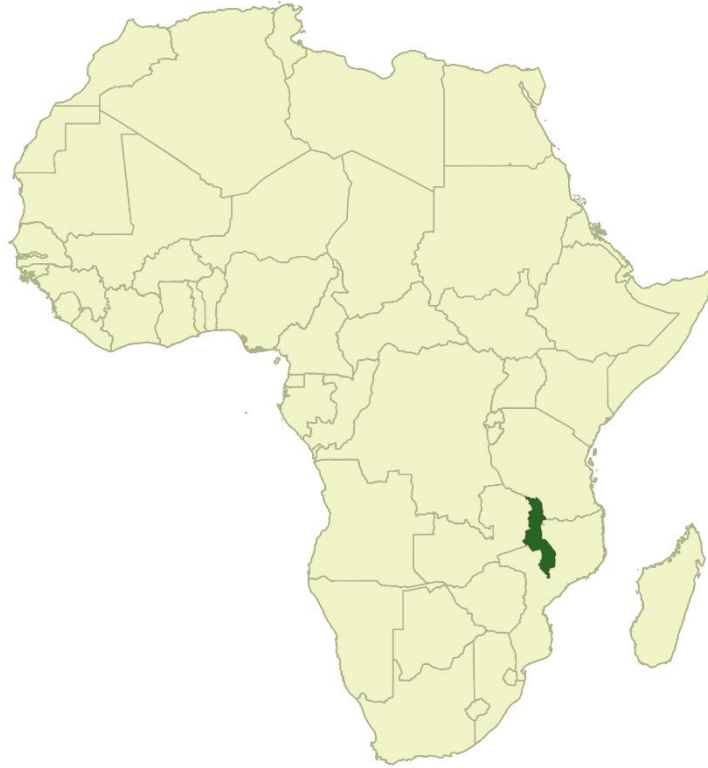

# Night light emission and Population of Malawian regions

## Night light emission in Malawi

Detected night lights

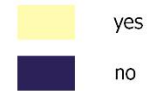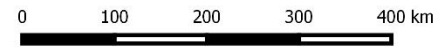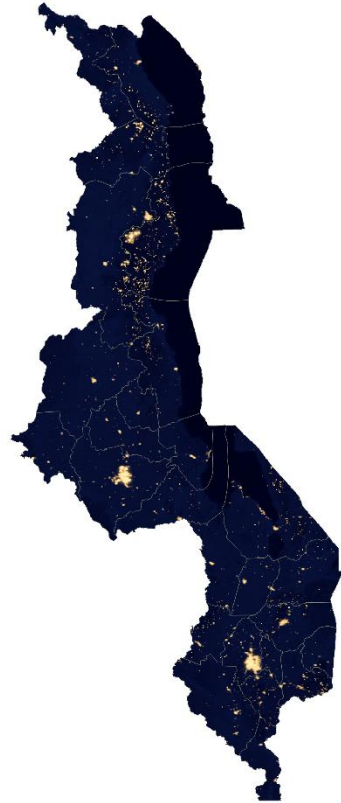

## Population structure of Malawi

Population density (people/750x750m<sup>2</sup>)

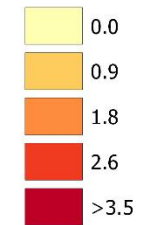

River and Lake

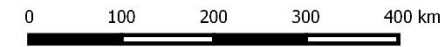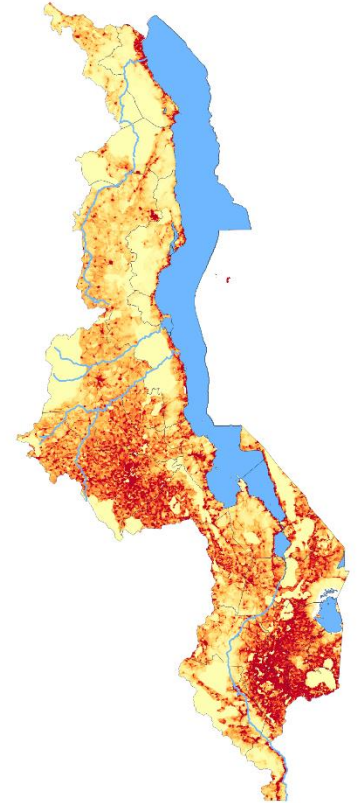

# Electrification option in all Malawian regions: GridBuilt-GridDom

## Electrification options of Malawian regions

Electrification option

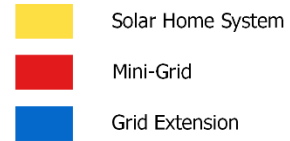

River and Lake

0 100 200 300 400 km

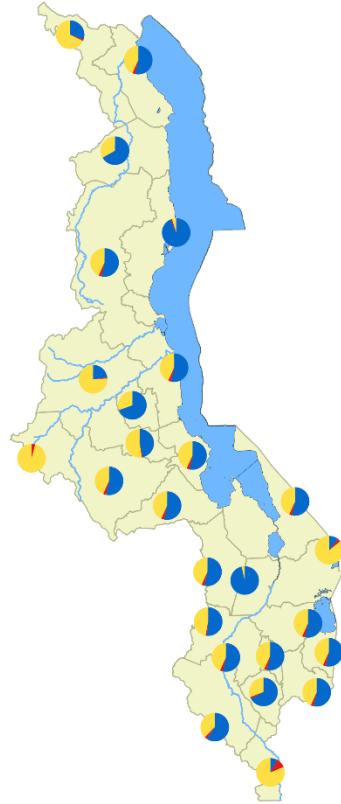

## Electrification options of Malawian regions

Electrification option

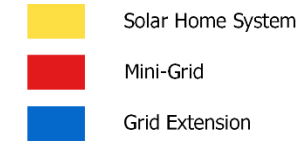

Grid Buffer (diameter)

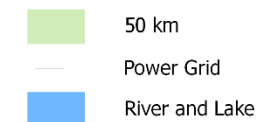

0 100 200 300 400 km

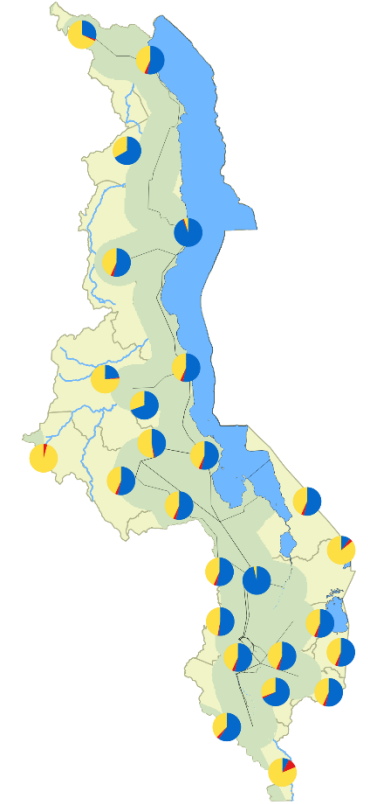

# Electrification option in all Malawian regions: GridBuilt-SHSDom

## Electrification options of Malawian regions

Electrification option

-  Solar Home System
-  Mini-Grid
-  Grid Extension

 River and Lake

0 100 200 300 400 km

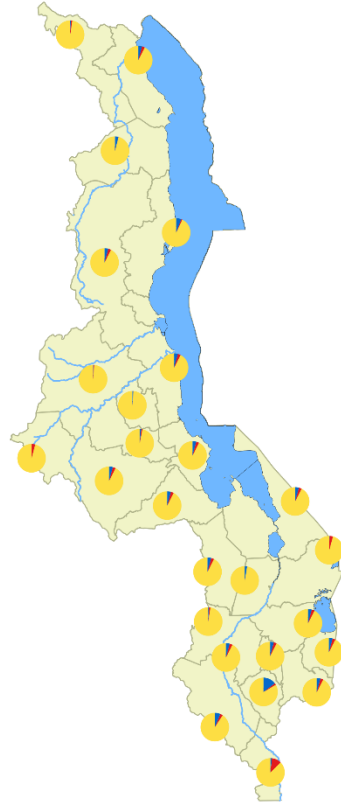

## Electrification options of Malawian regions

Electrification option

-  Solar Home System
-  Mini-Grid
-  Grid Extension

Grid Buffer (diameter)

-  50 km
-  Power Grid
-  River and Lake

0 100 200 300 400 km

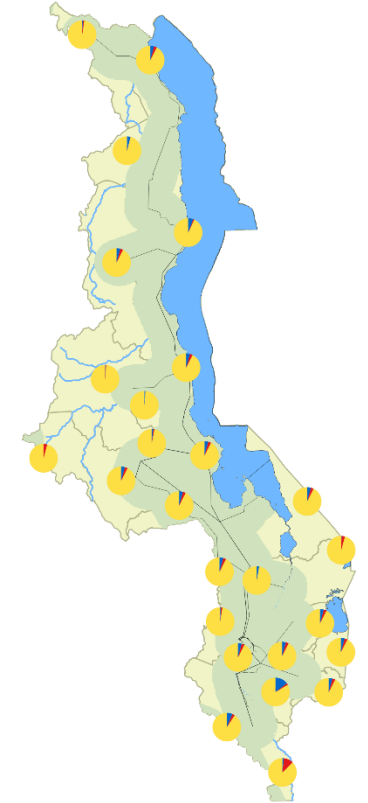

# Electrification option: GridBuilt-SHSDom

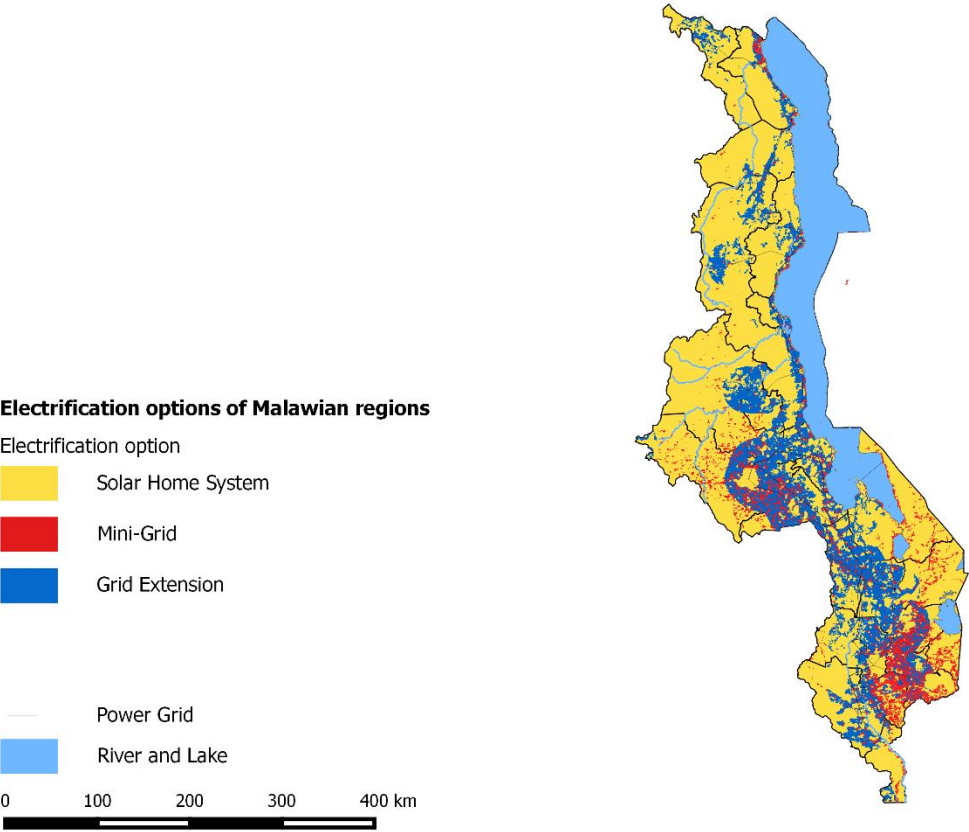

# Electrification option: GridBuilt-GridDom

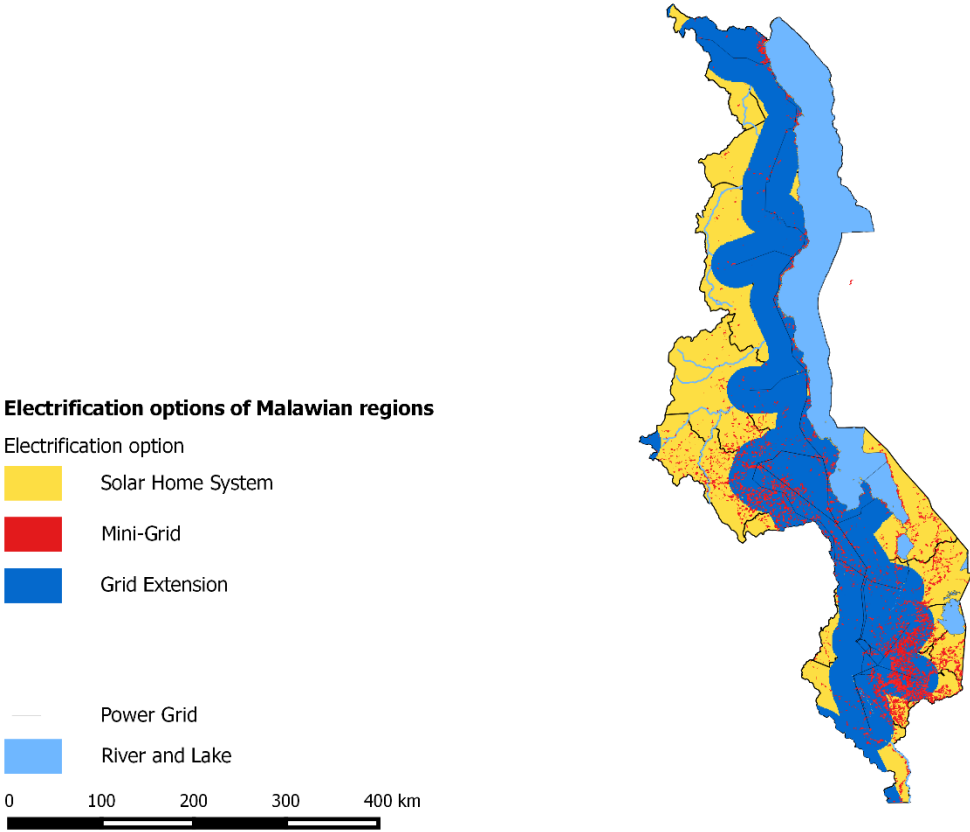

Share of electrification options in all Malawian regions

SHS (%) Mini-Grid (%) Grid (%)

GridBuilt-GridDom

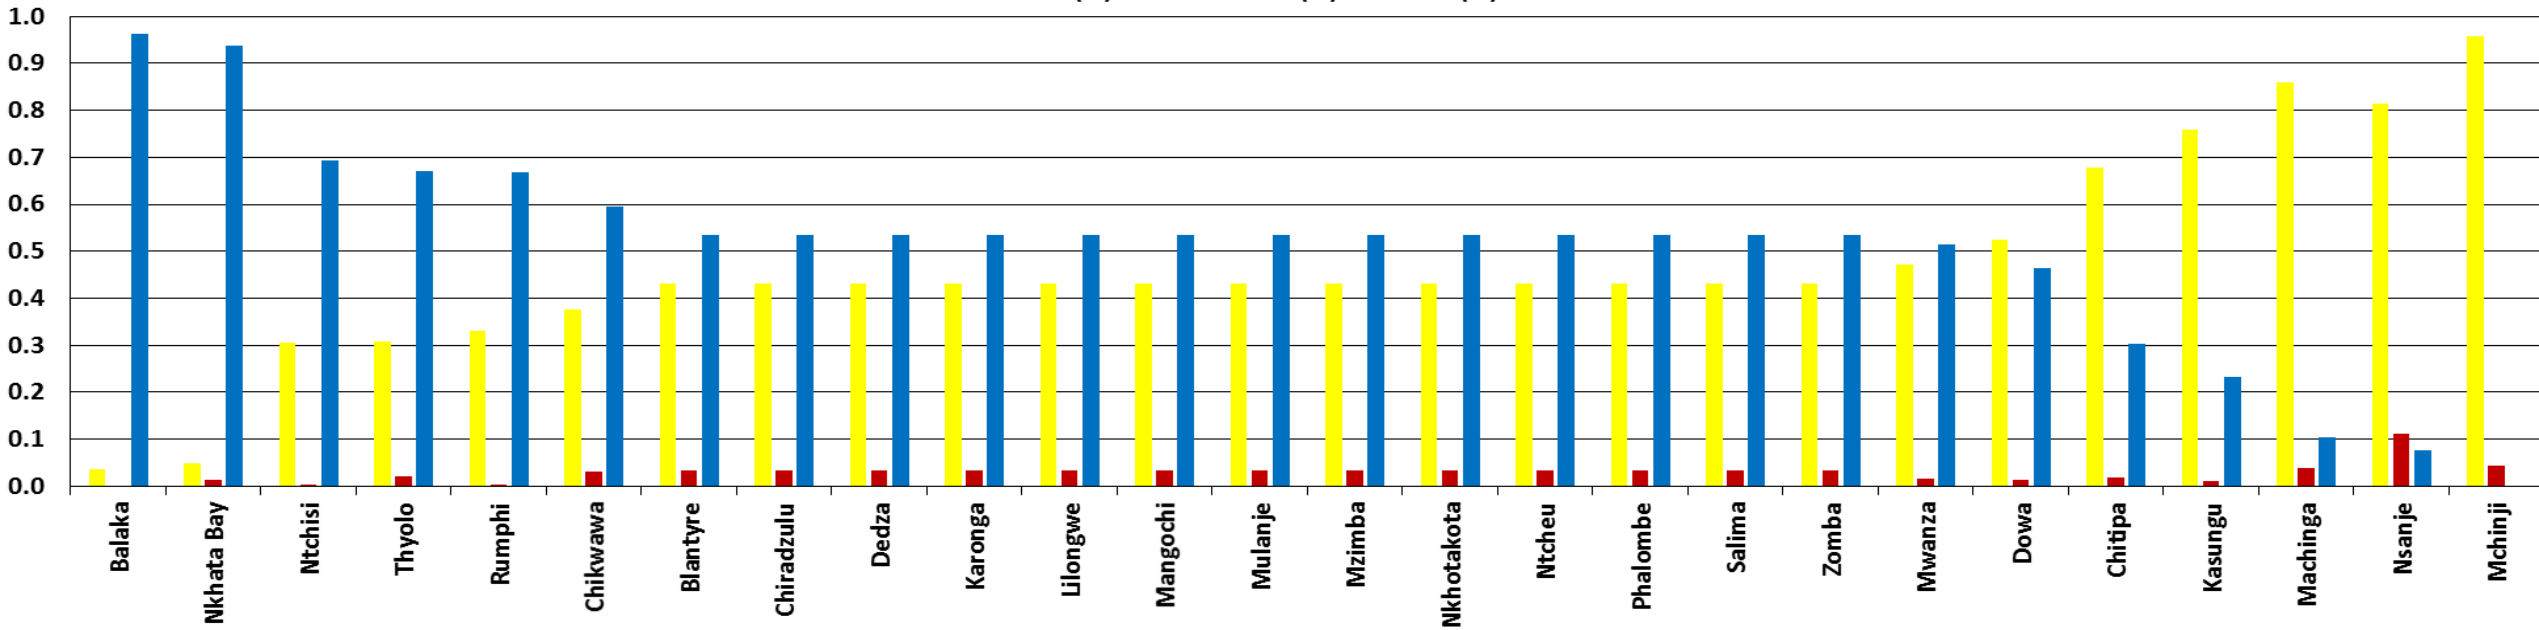

Share of electrification options in all Malawian regions

SHS (%) Mini-Grid (%) Grid (%)

GridBuilt-SHSDom

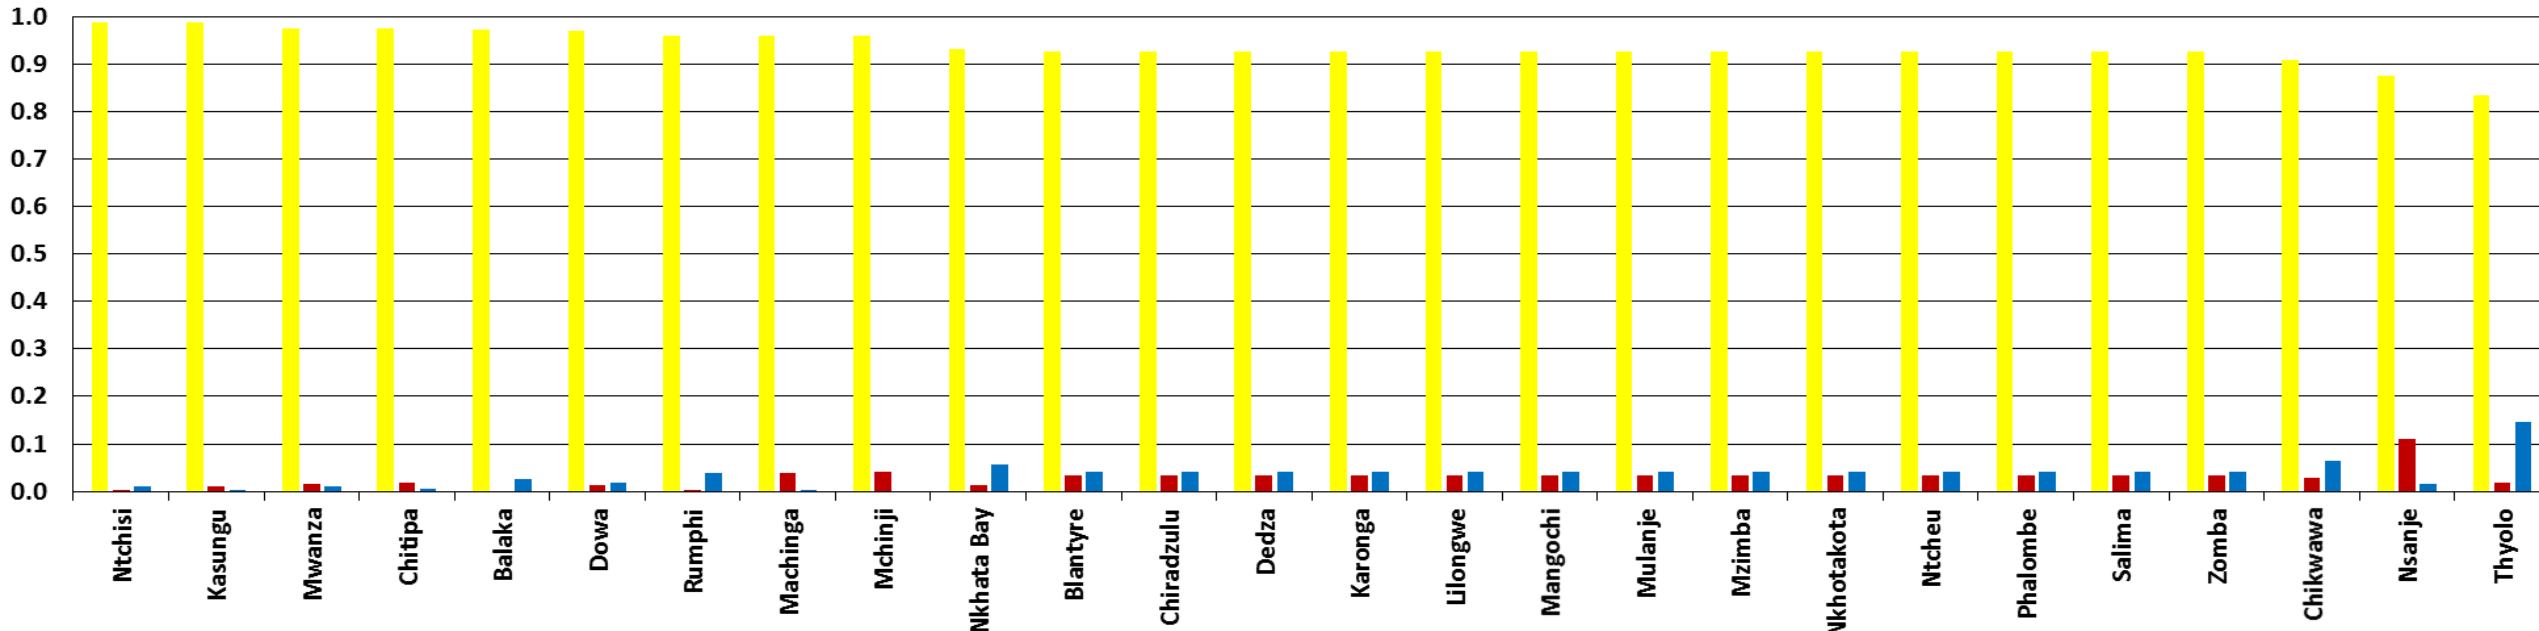

# Electrification option in all Malawian regions: GridPlanned-GridDom

## Electrification options of Malawian regions

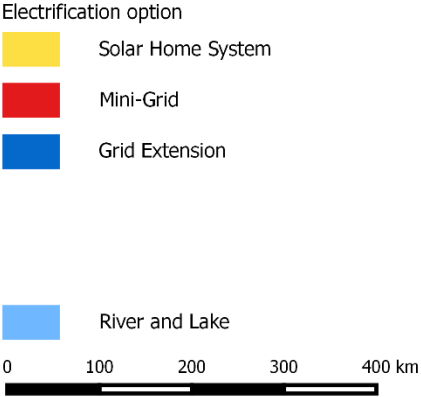

## Electrification options of Malawian regions

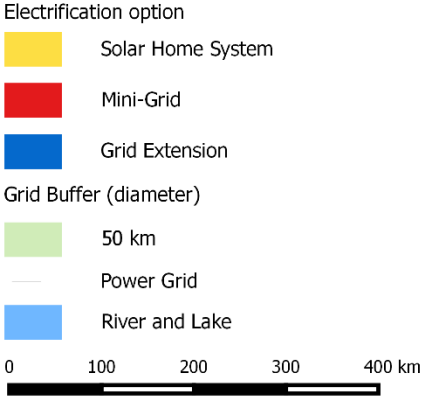

# Electrification option in all Malawian regions: GridPlanned-SHSDom

## Electrification options of Malawian regions



## Electrification options of Malawian regions



# Electrification option: GridPlanned-SHSDom

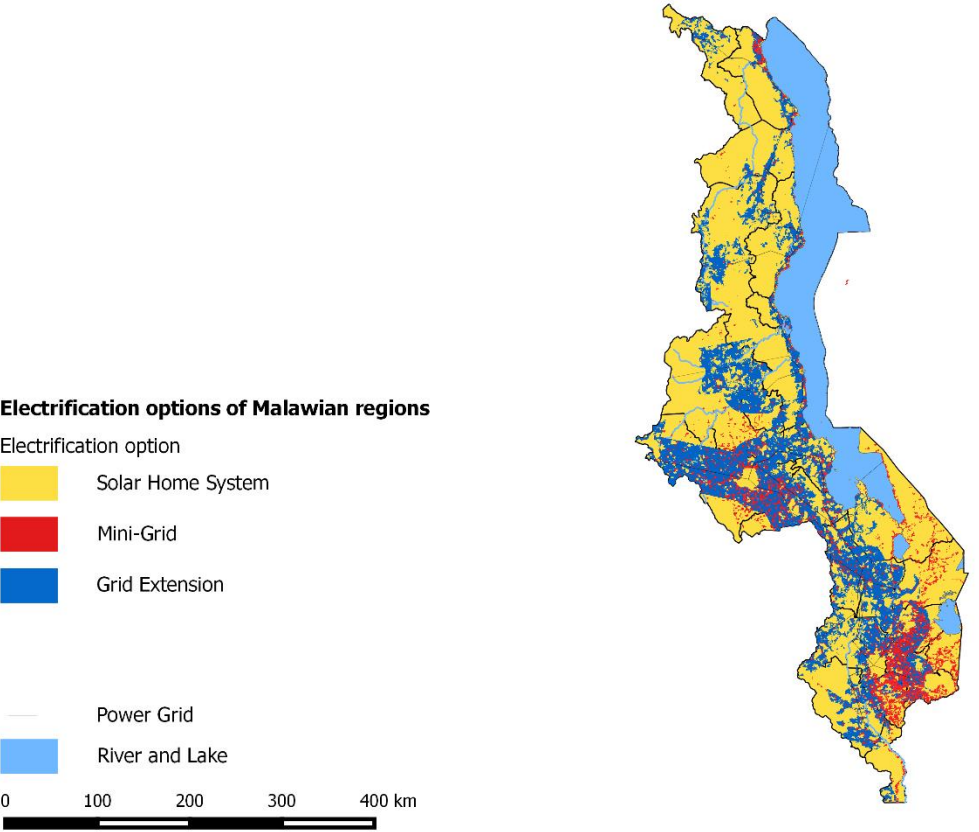

# Electrification option: GridPlanned-GridDom

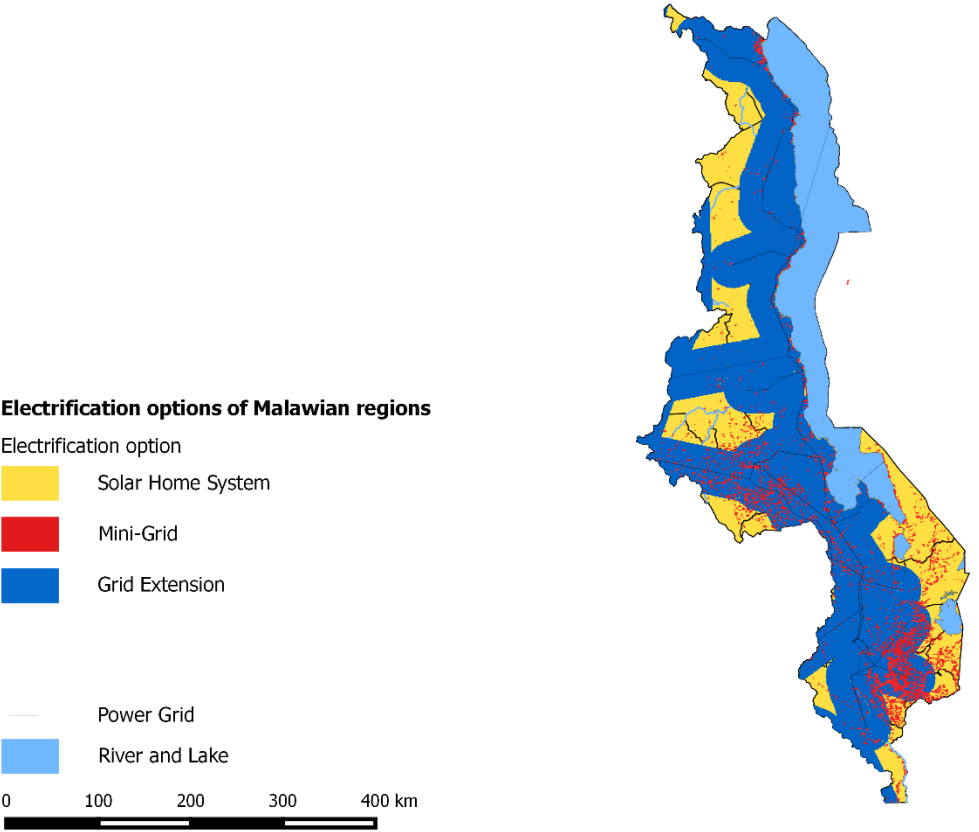

Share of electrification options in all Malawian regions

GridPlanned-GridDom

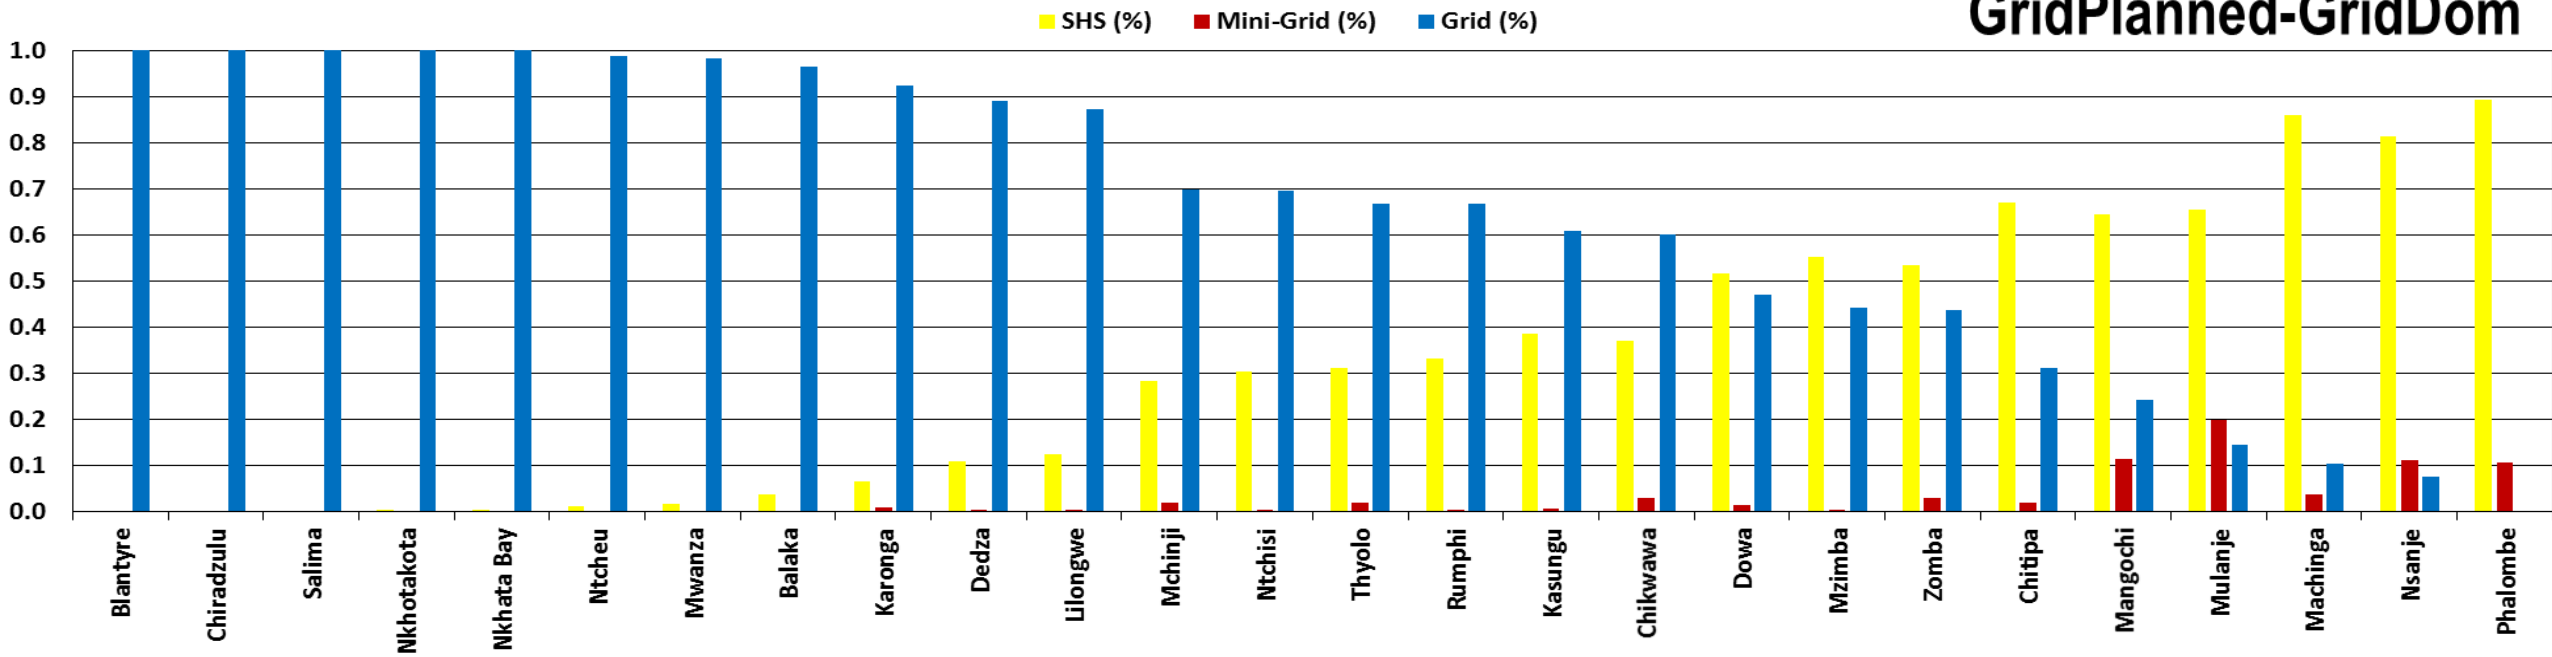

Share of electrification options in all Malawian regions

GridPlanned-SHSDom

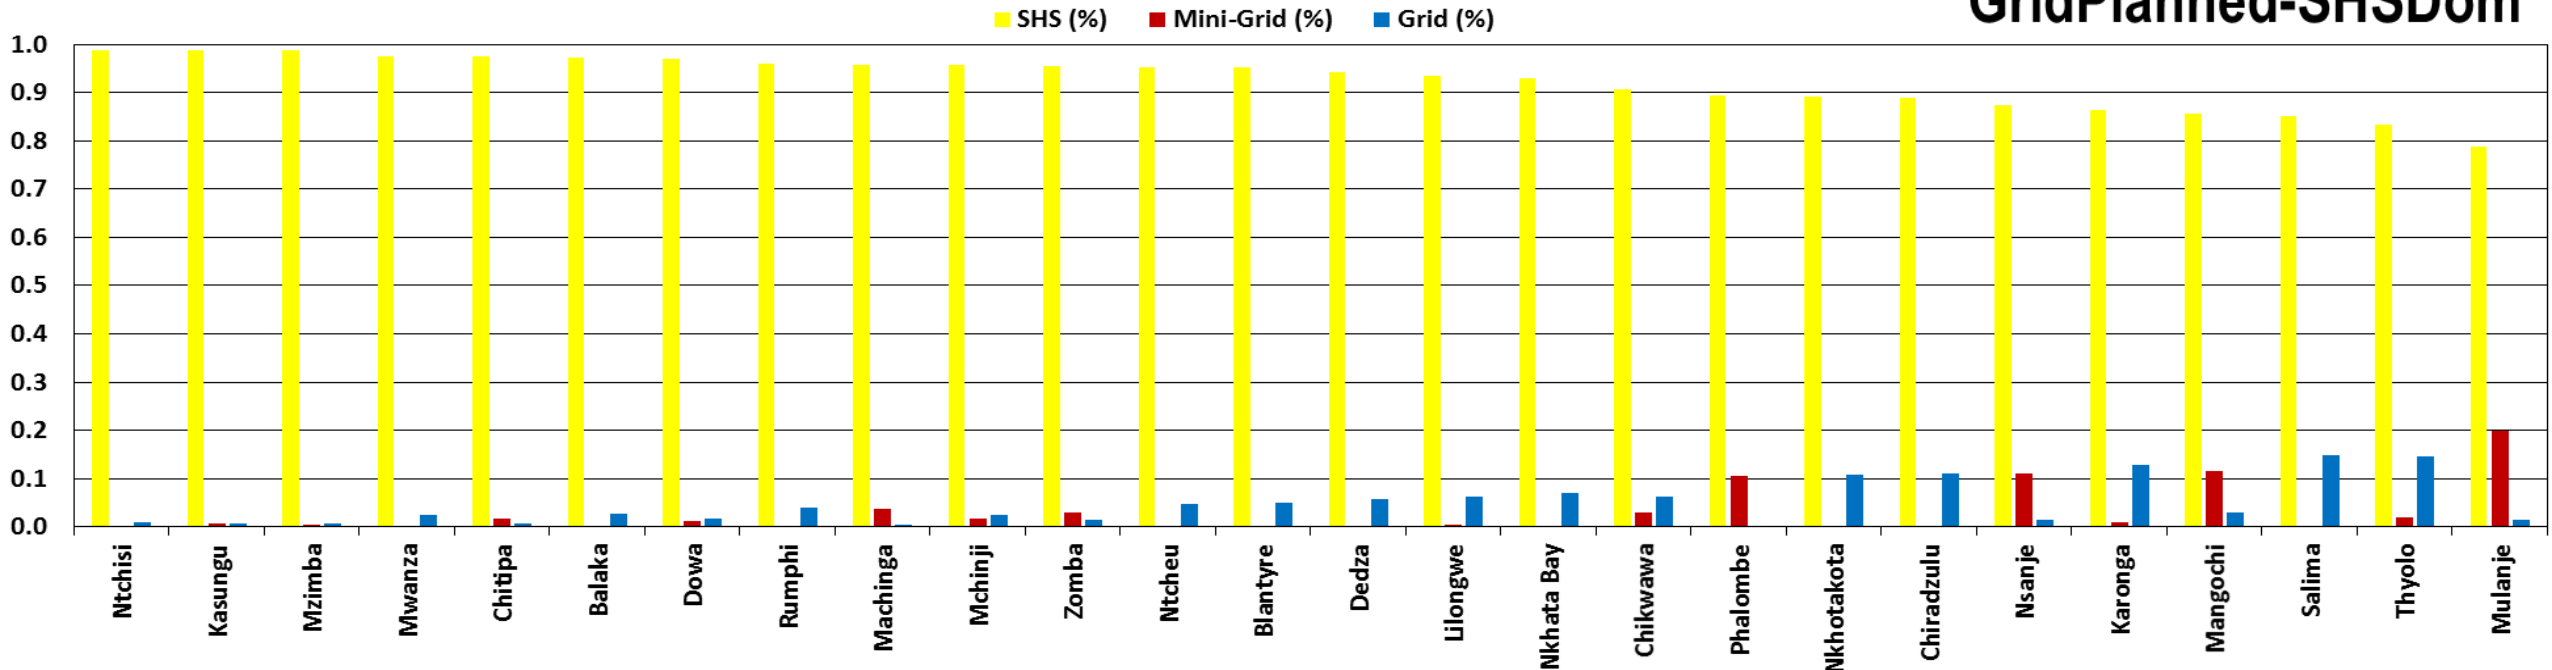

# Mozambique

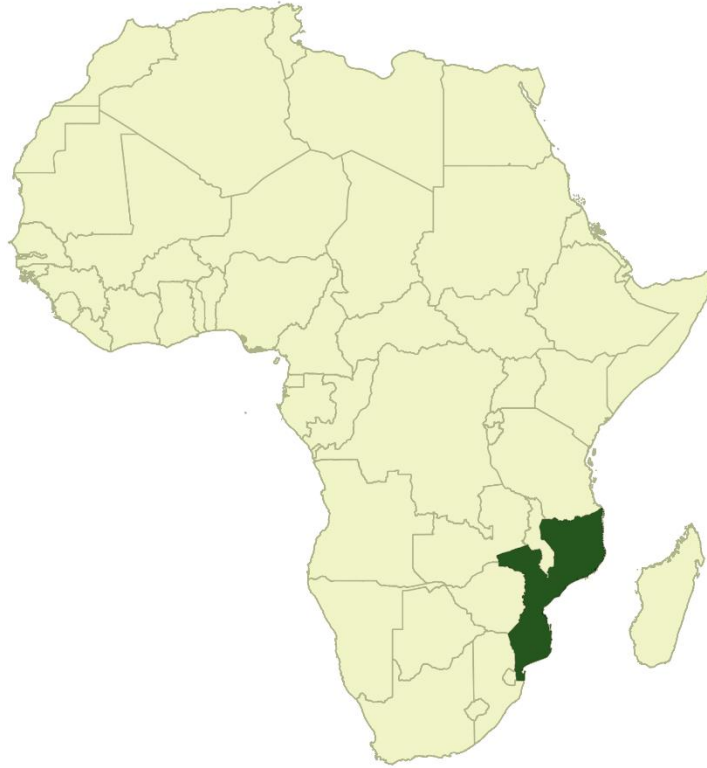

# Night light emission and Population of Mozambican regions

## Night light emission in Mozambique

Detected night lights

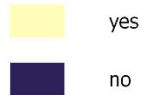

0 250 500 750 1000 km

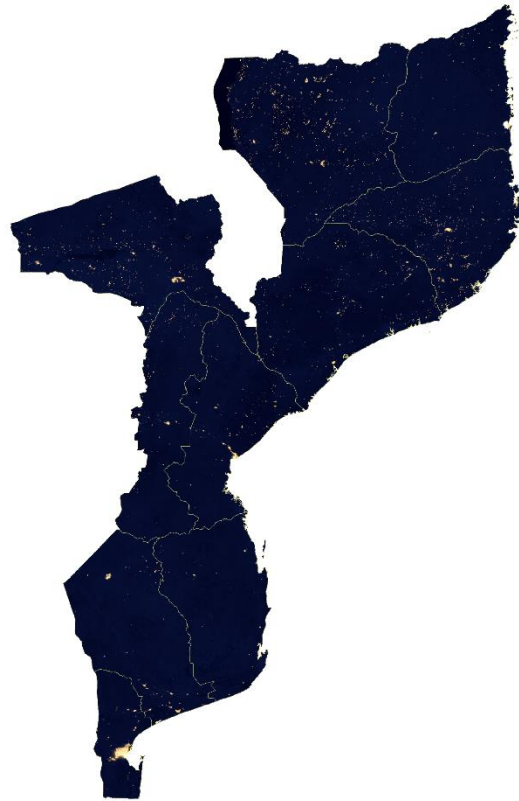

## Population structure of Mozambique

Population density (people/750x750m<sup>2</sup>)

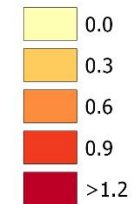

River and Lake (blue)

0 250 500 750 1000 km

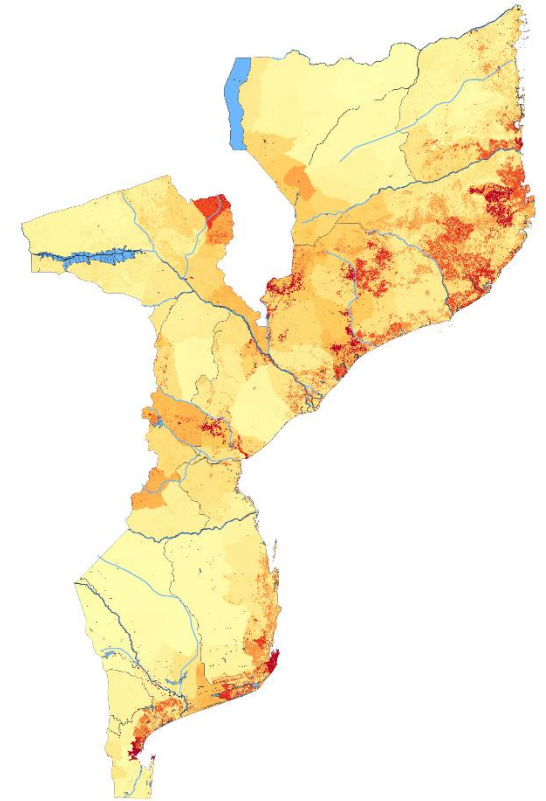

# Electrification option in all Mozambican regions: GridBuilt-GridDom

## Electrification options of Mozambican regions

Electrification option

-  Solar Home System
-  Mini-Grid
-  Grid Extension

 River and Lake

0 250 500 750 1000 km

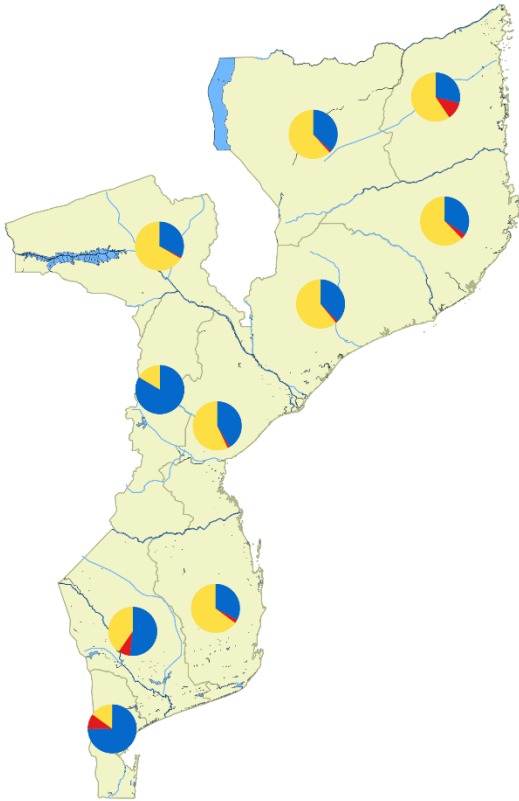

## Electrification options of Mozambican regions

Electrification option

-  Solar Home System
-  Mini-Grid
-  Grid Extension

Grid Buffer (diameter)

 50 km

 Power Grid

 River and Lake

0 250 500 750 1000 km

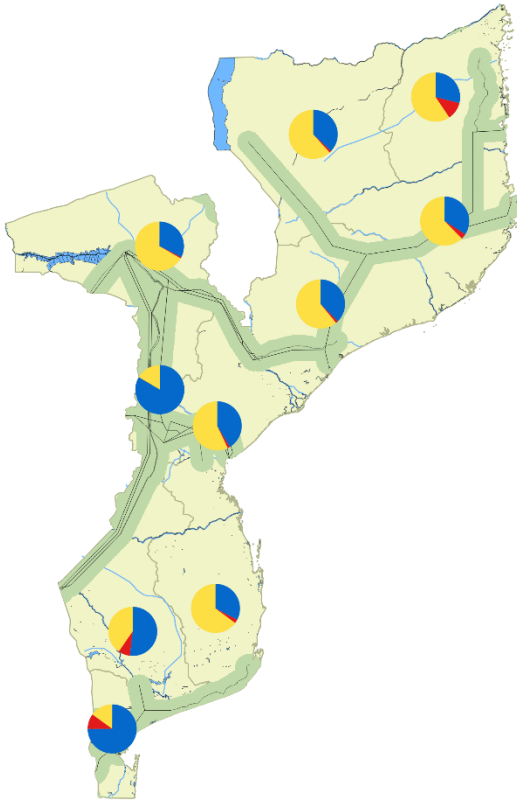

# Electrification option in all Mozambican regions: GridBuilt-SHSDom

## Electrification options of Mozambican regions

Electrification option

- Solar Home System
- Mini-Grid
- Grid Extension

River and Lake

0 250 500 750 1000 km

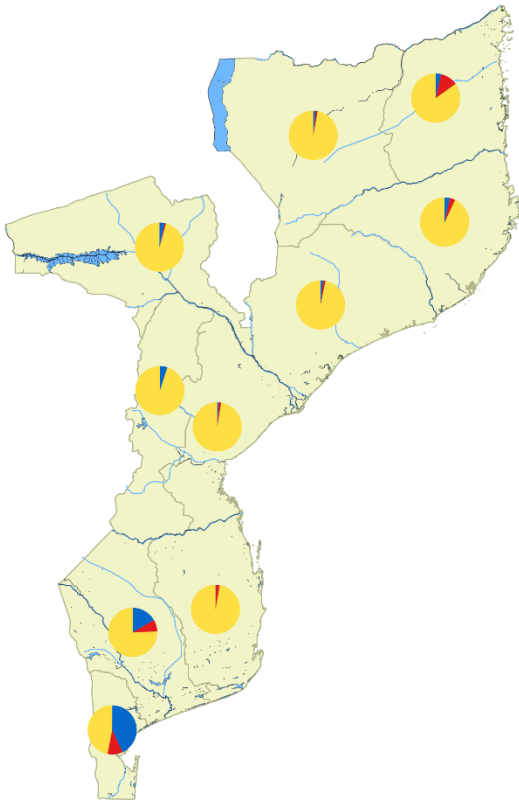

## Electrification options of Mozambican regions

Electrification option

- Solar Home System
- Mini-Grid
- Grid Extension

Grid Buffer (diameter)

- 50 km
- Power Grid
- River and Lake

0 250 500 750 1000 km

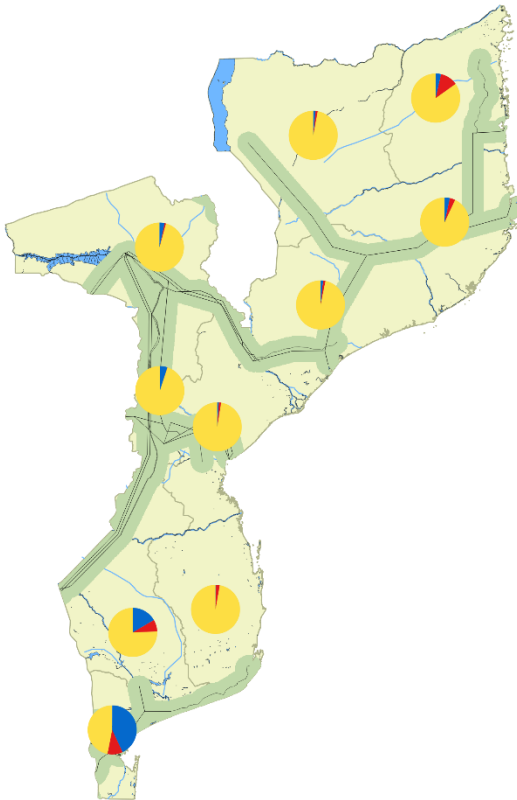

# Electrification option: GridBuilt-SHSDom

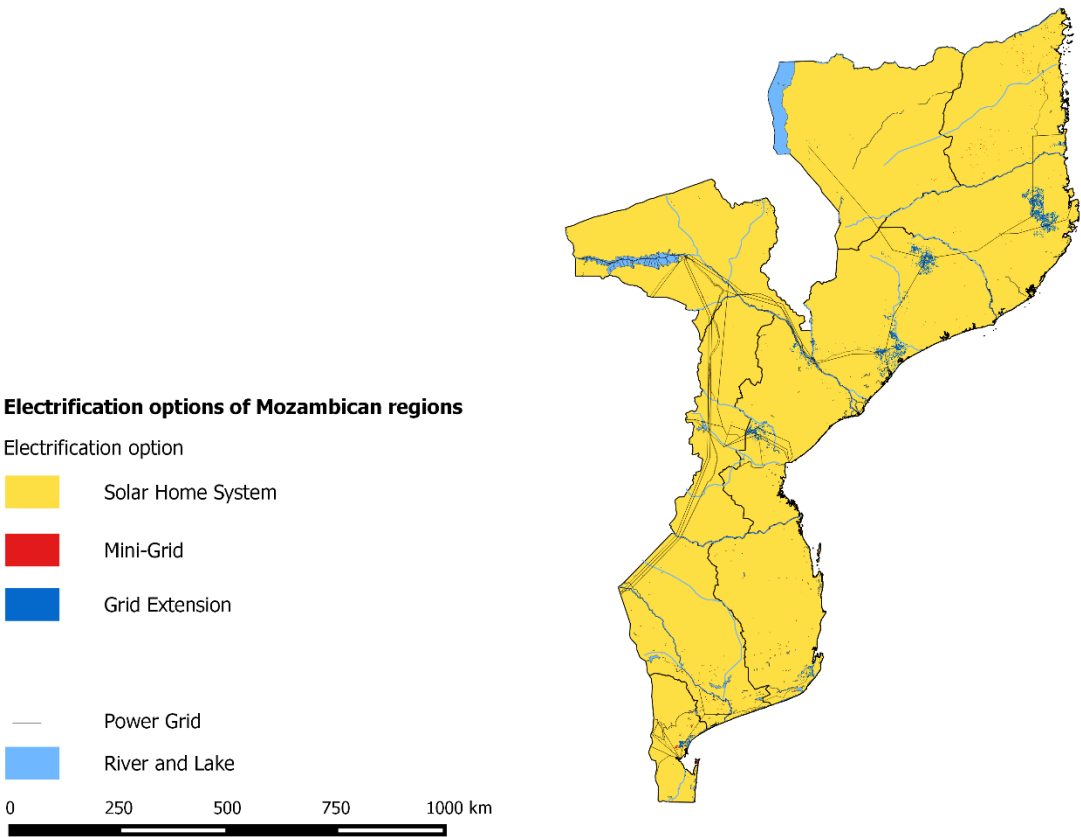

# Electrification option: GridBuilt-GridDom

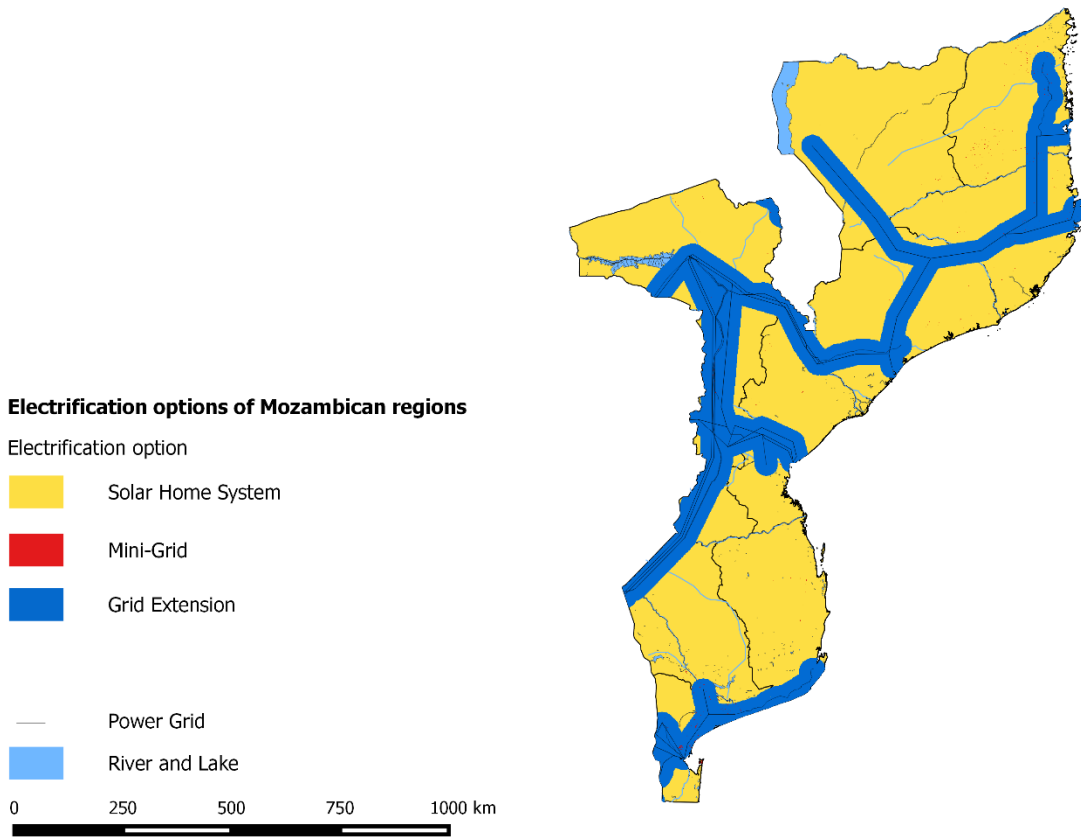

Share of electrification options in all Mozambican regions

SHS (%) Mini-Grid (%) Grid (%)

GridBuilt-GridDom

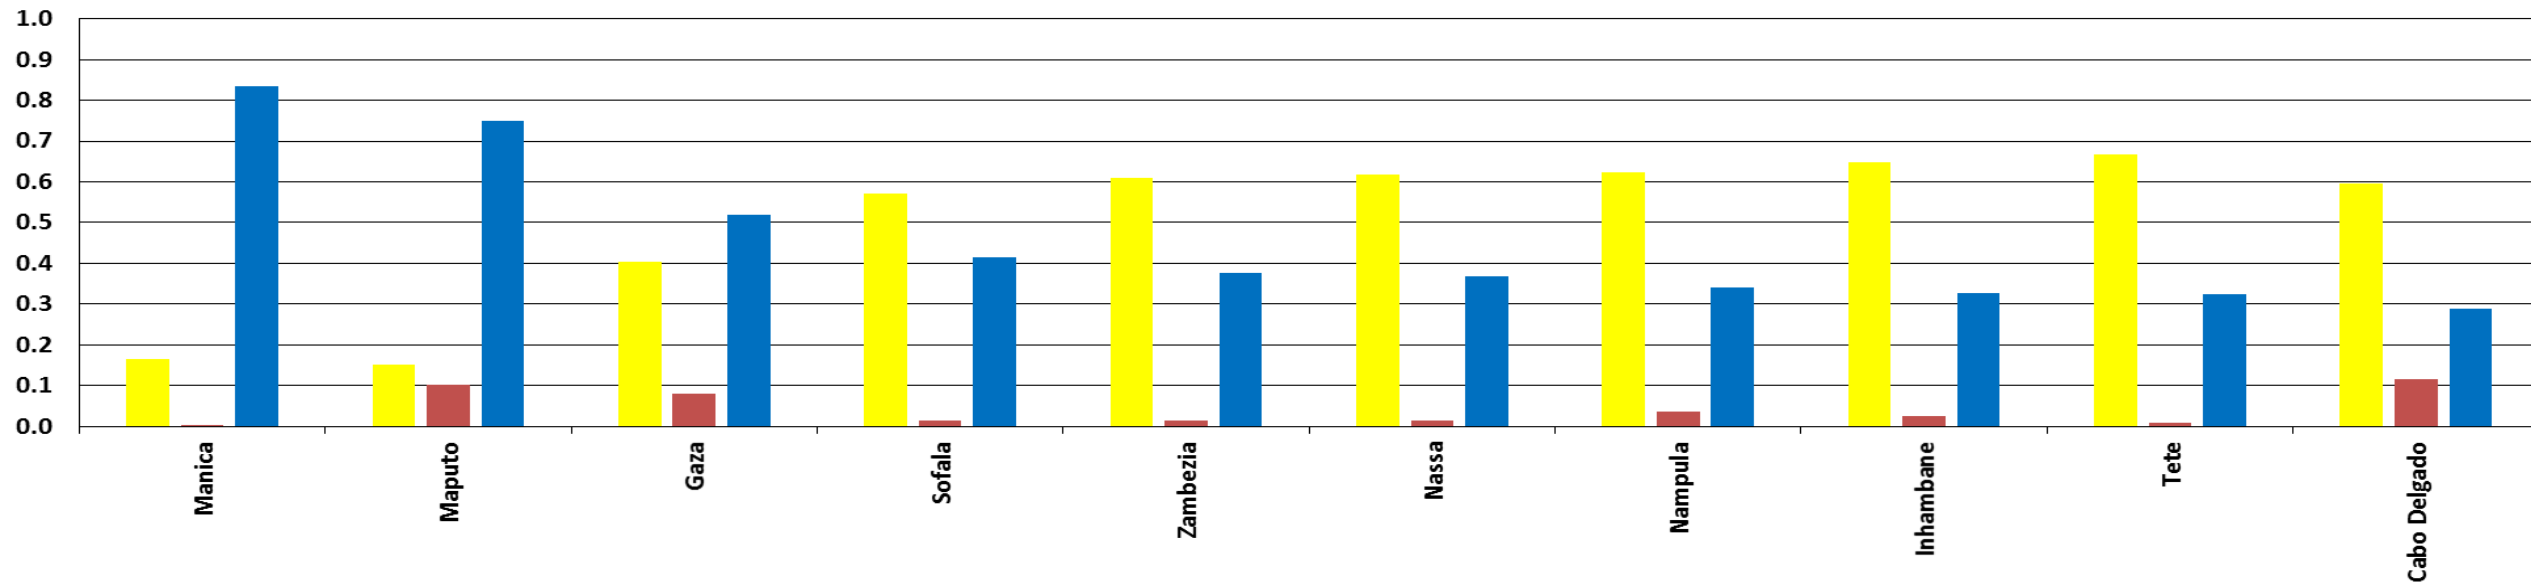

Share of electrification options in all Mozambican regions

SHS (%) Mini-Grid (%) Grid (%)

GridBuilt-SHSDom

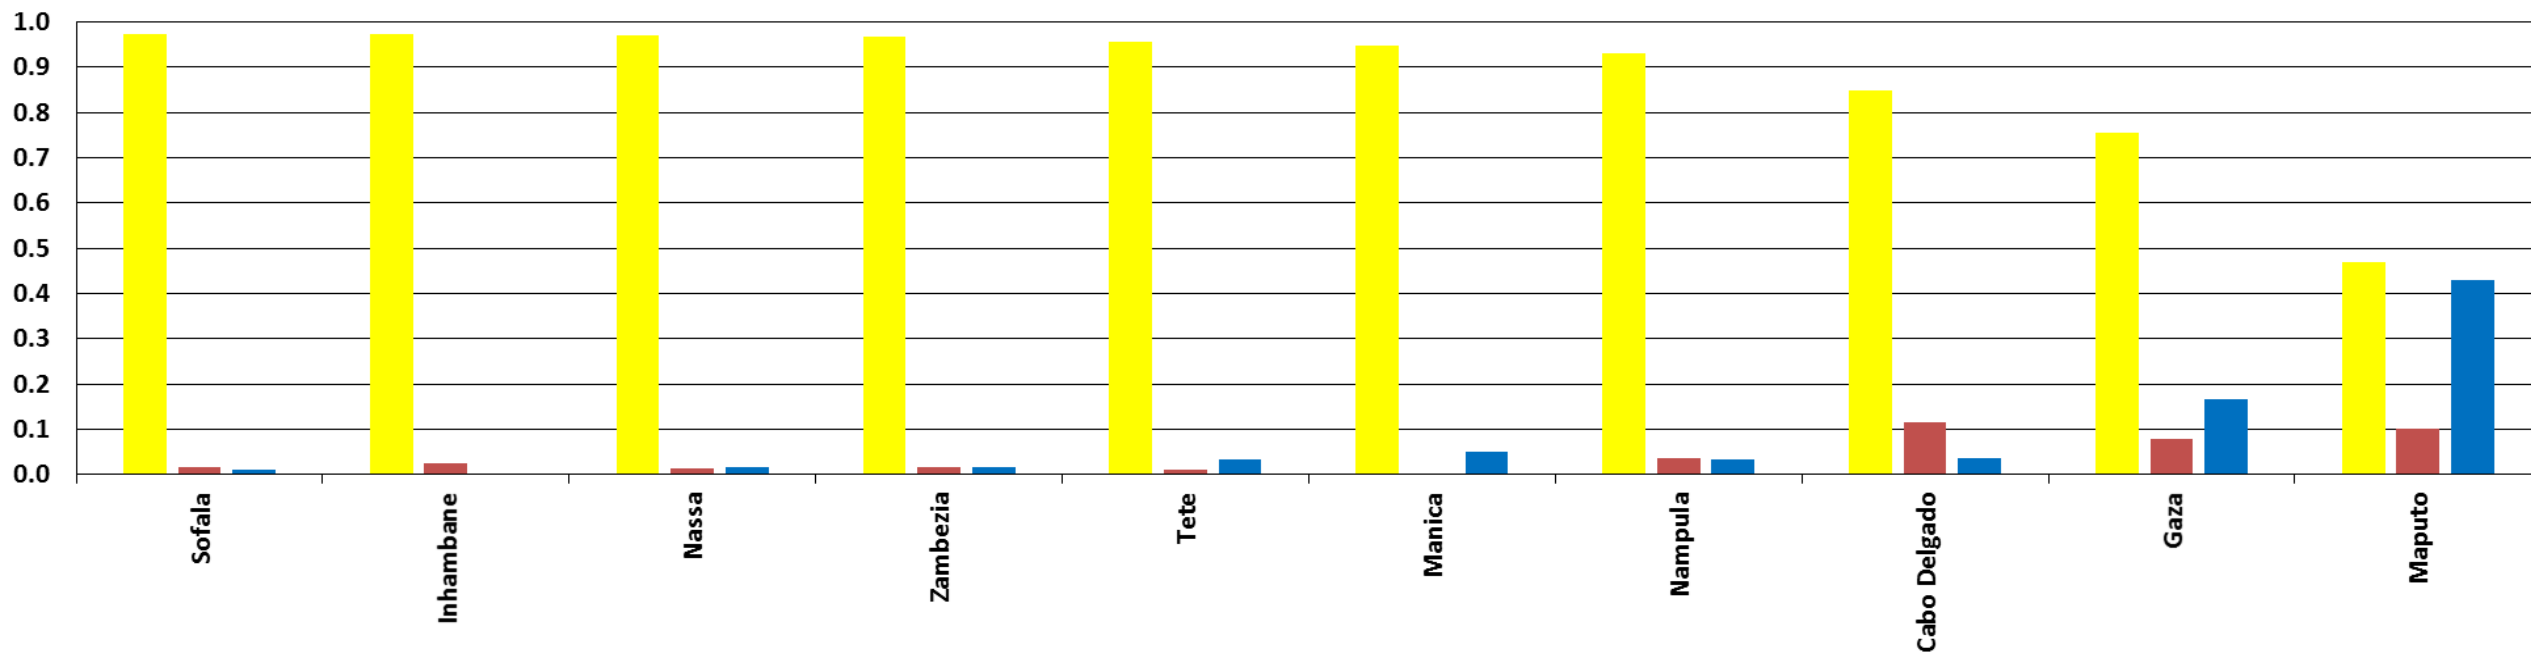

# Electrification option in all Mozambican regions: GridPlanned-GridDom

## Electrification options of Mozambican regions

Electrification option

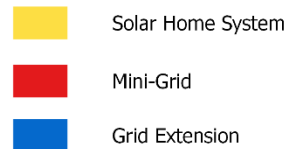

River and Lake

0 250 500 750 1000 km

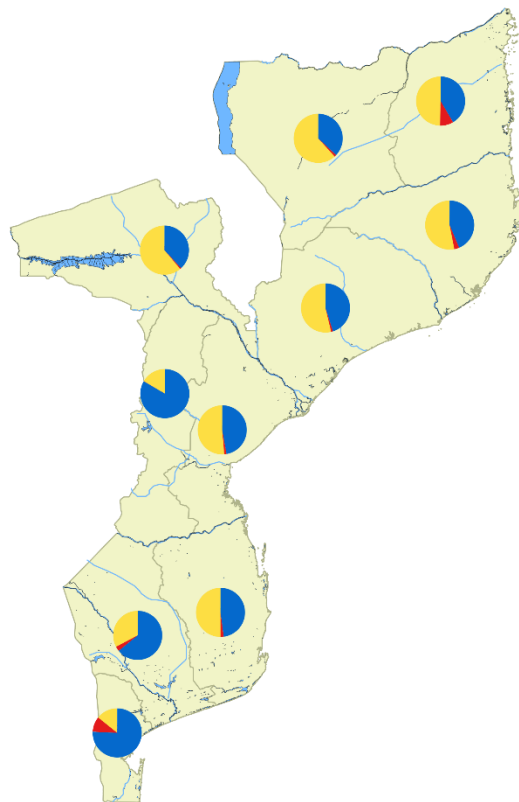

## Electrification options of Mozambican regions

Electrification option

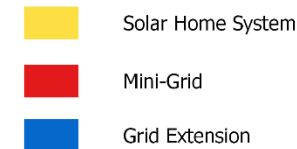

Grid Buffer (diameter)

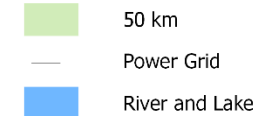

0 250 500 750 1000 km

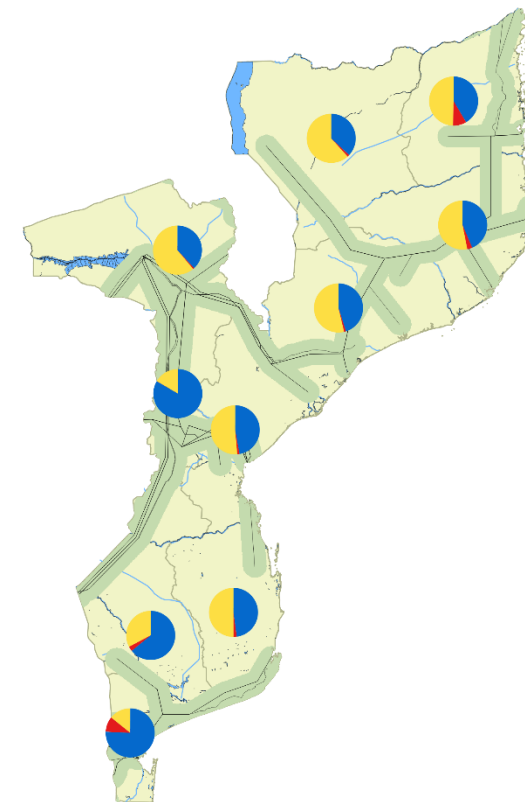

# Electrification option in all Mozambican regions: GridPlanned-SHSDom

## Electrification options of Mozambican regions

Electrification option

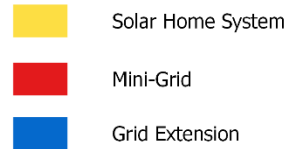

River and Lake

0 250 500 750 1000 km

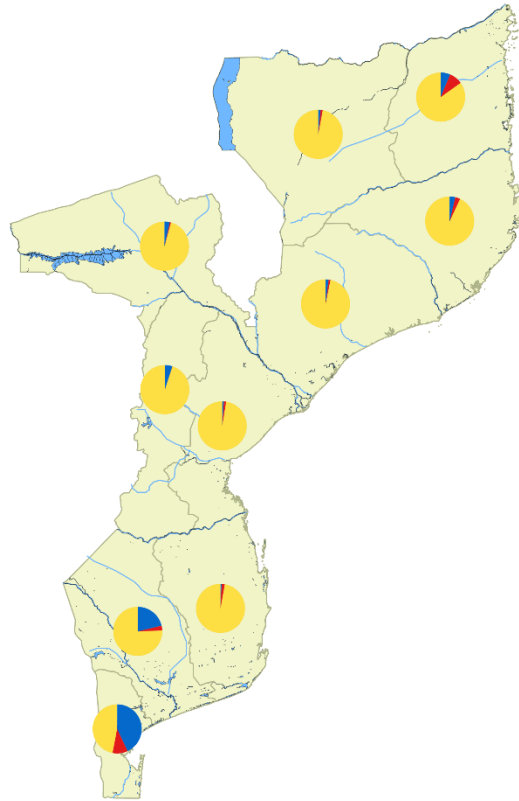

## Electrification options of Mozambican regions

Electrification option

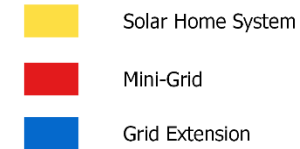

Grid Buffer (diameter)

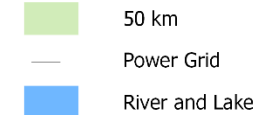

0 250 500 750 1000 km

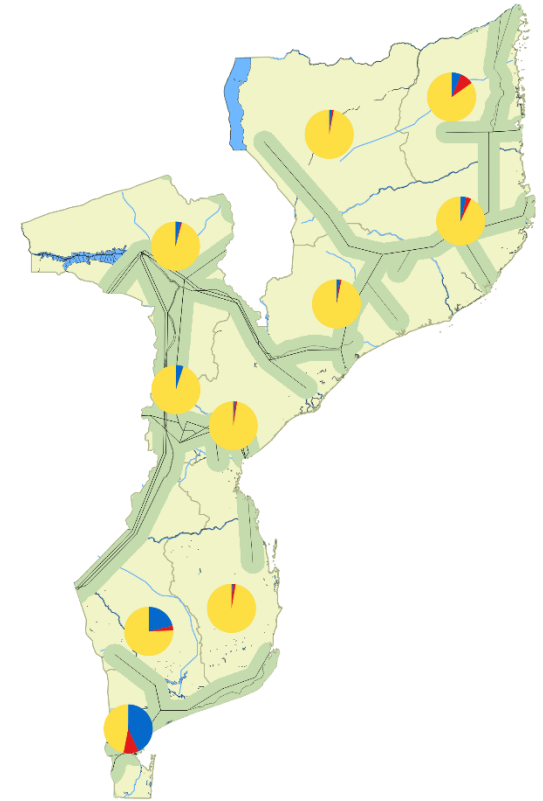

# Electrification option: GridPlanned-SHSDom

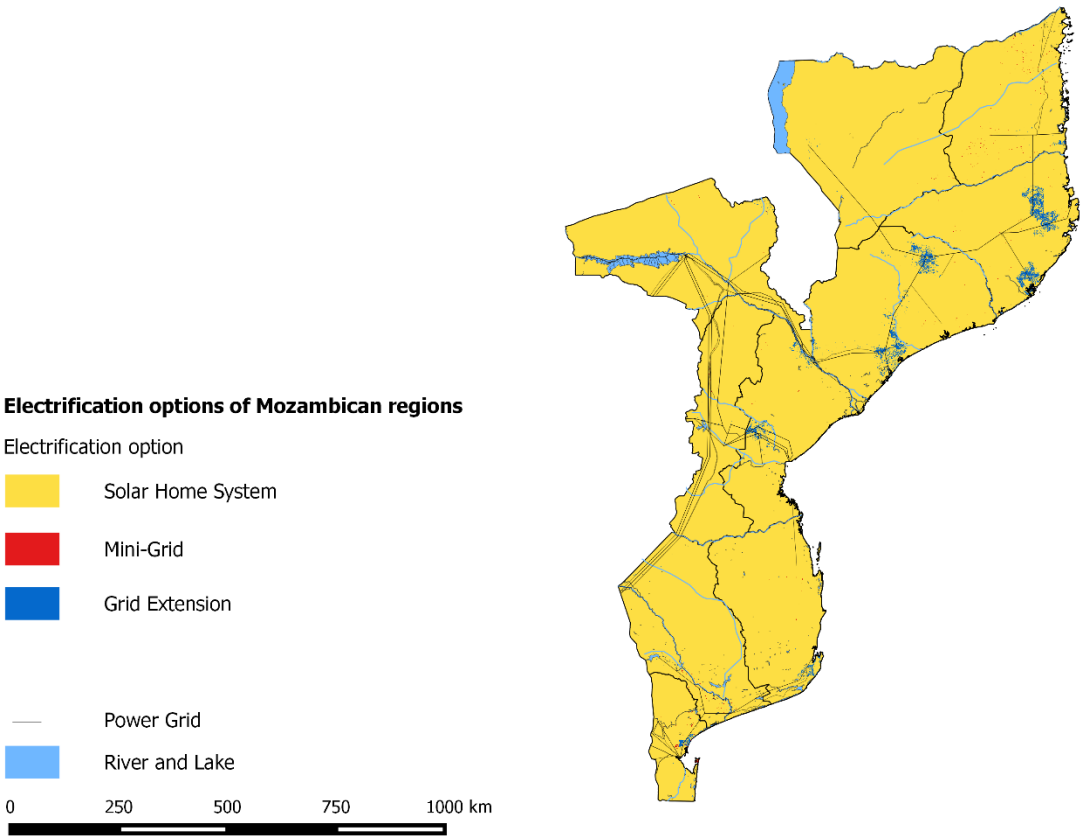

# Electrification option: GridPlanned-GridDom

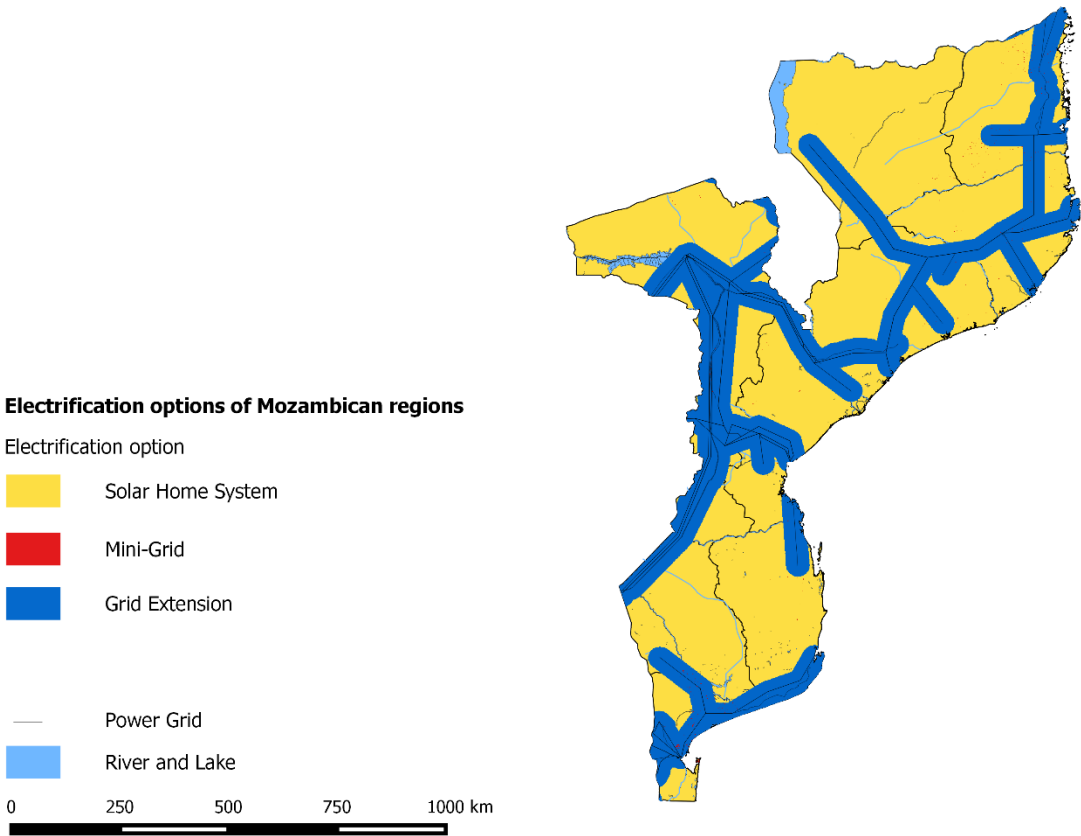

Share of electrification options in all Mozambican regions

SHS (%) Mini-Grid (%) Grid (%)

GridPlanned-GridDom

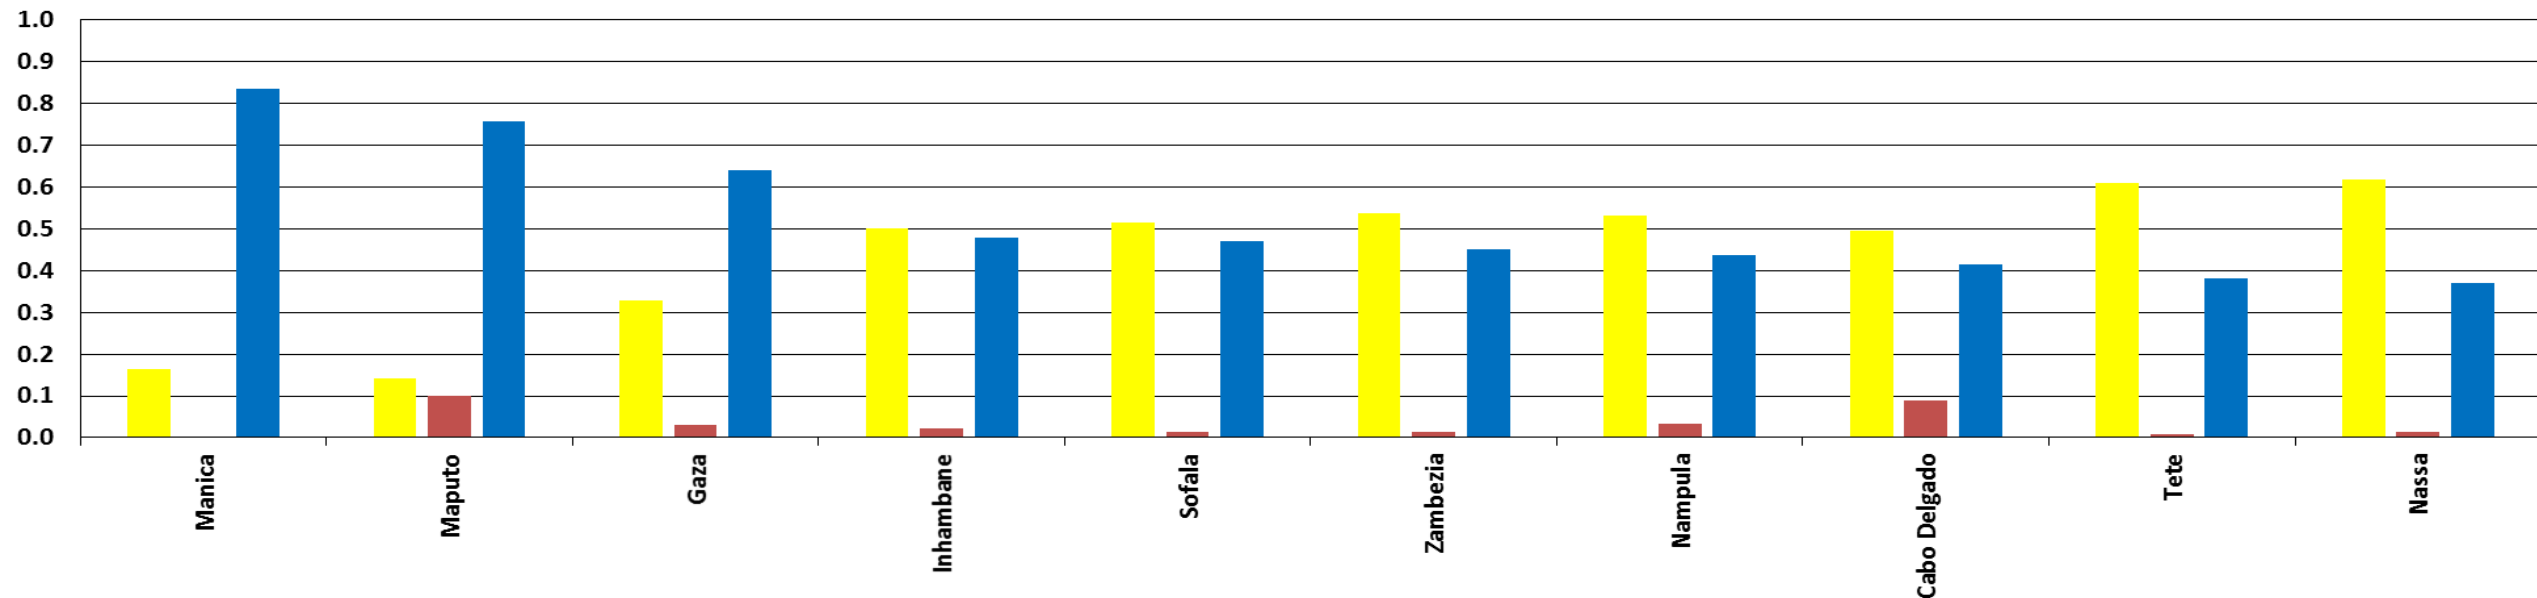

Share of electrification options in all Mozambican regions

SHS (%) Mini-Grid (%) Grid (%)

GridPlanned-SHSDom

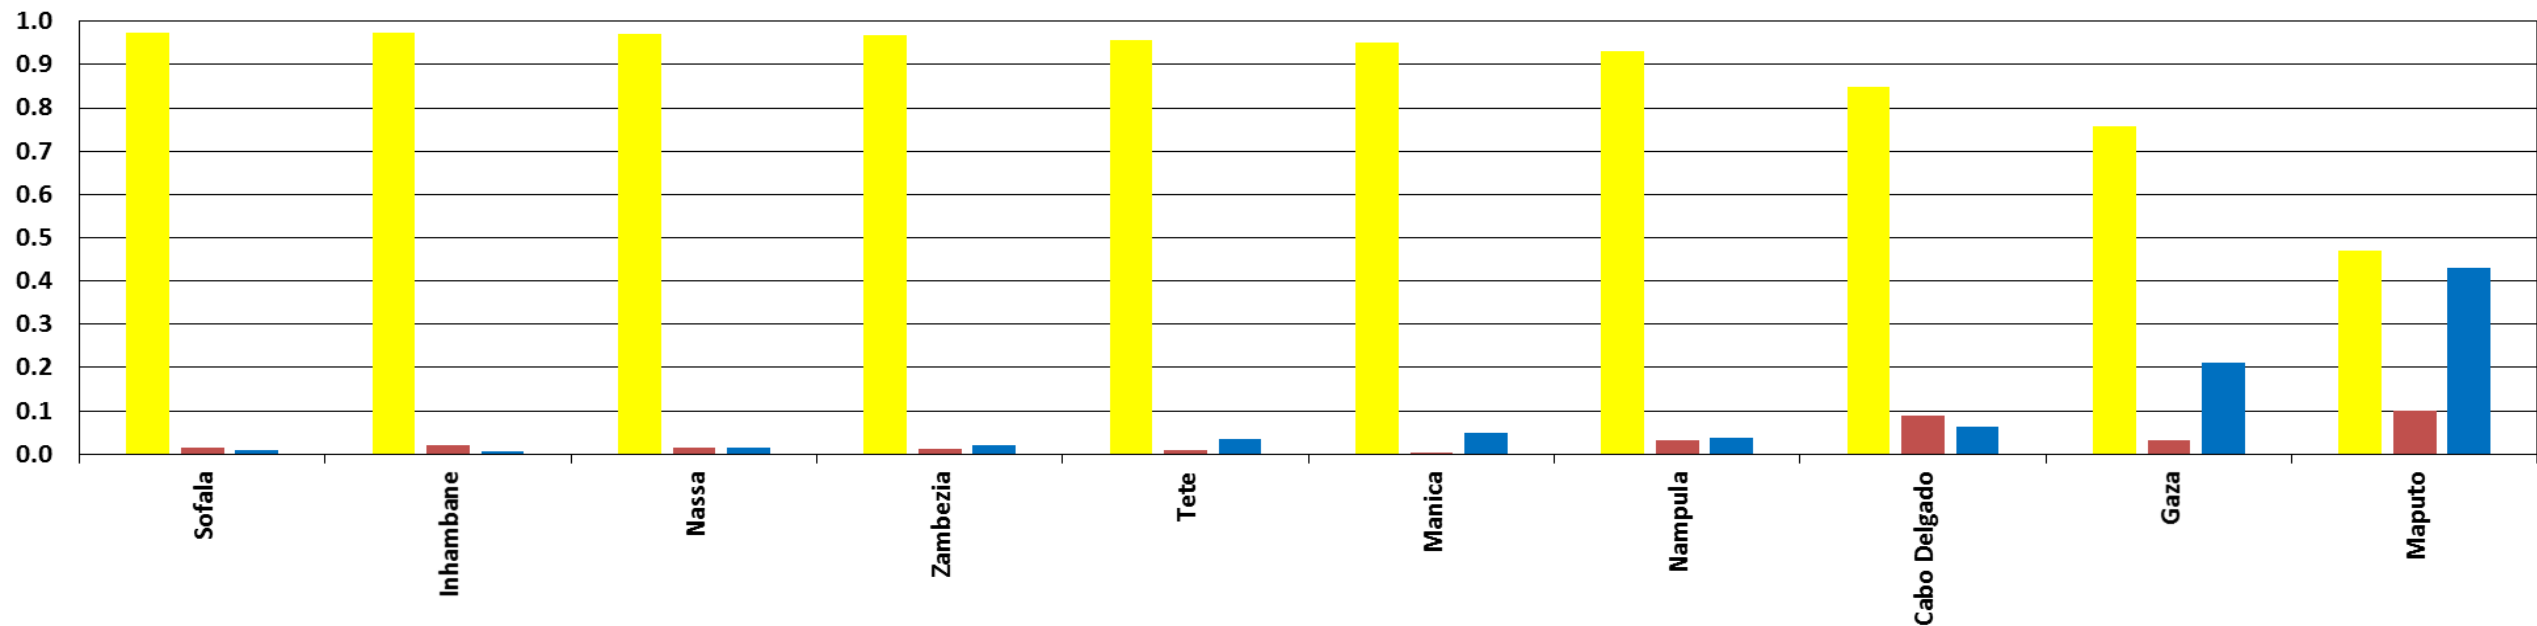

# Rwanda

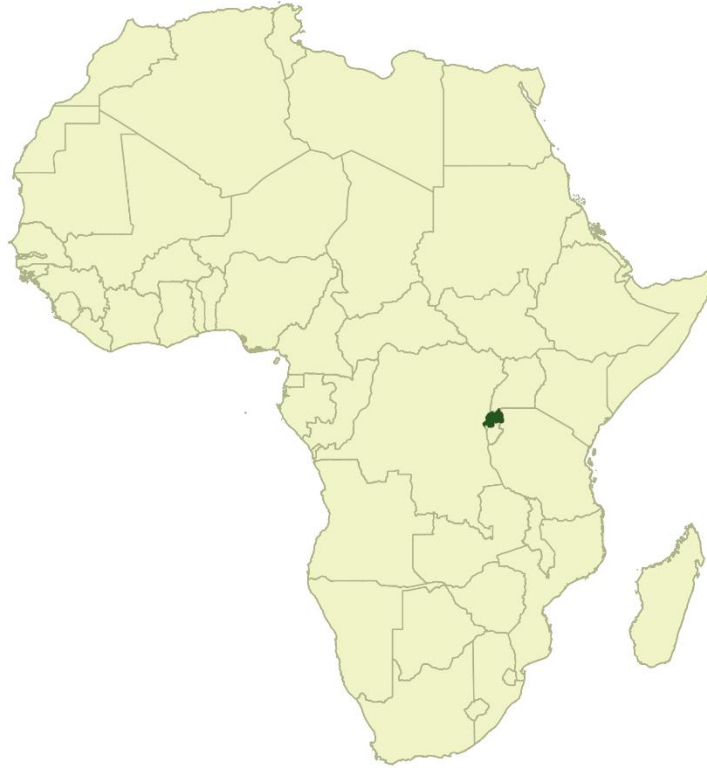

# Night light emission and Population of Rwandan regions

## Night light emission in Rwanda

Detected night lights

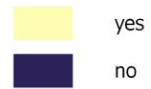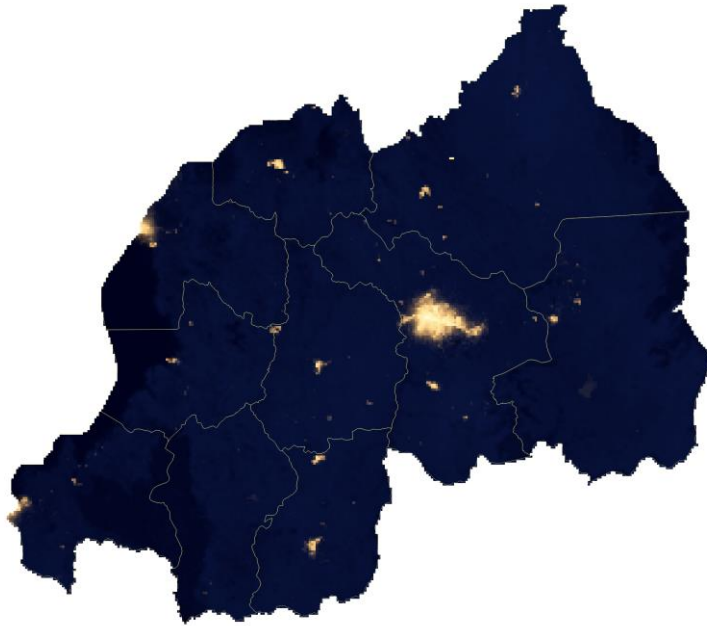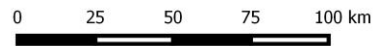

## Population structure of Rwanda

Population density (people/750x750m<sup>2</sup>)

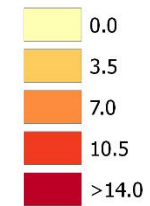

River and Lake (blue)

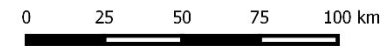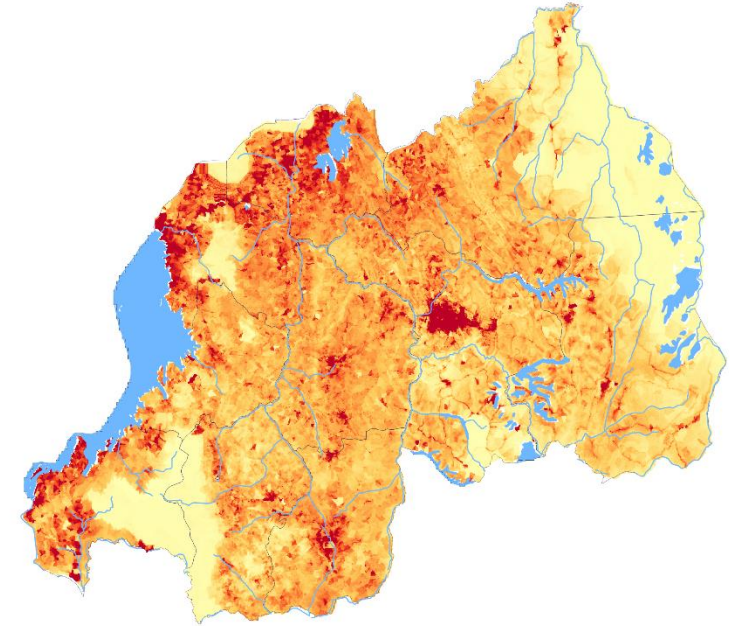

# Electrification option in all Rwandan regions: GridBuilt-GridDom

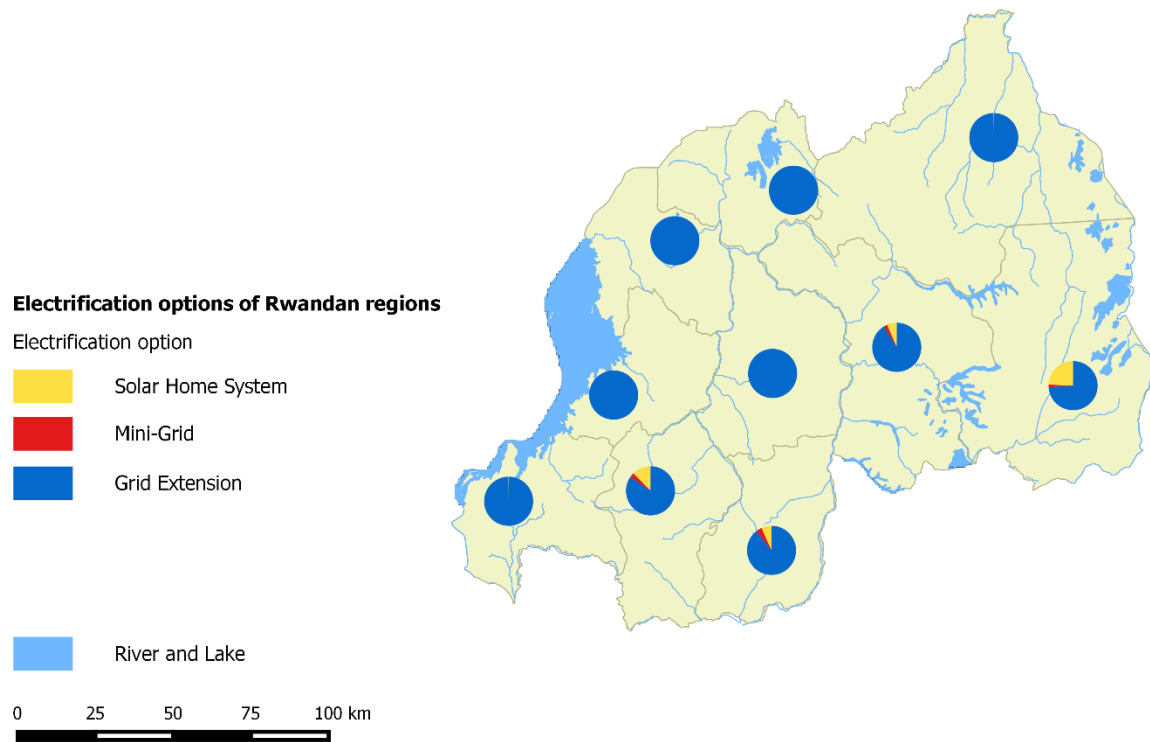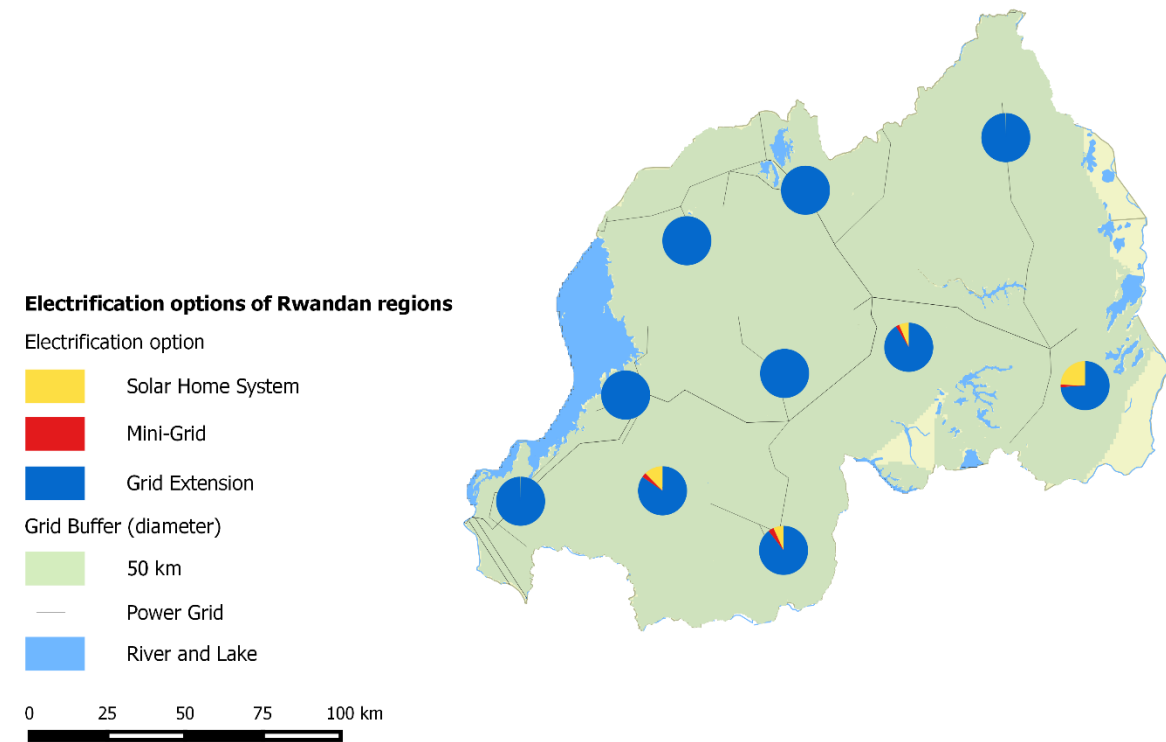

# Electrification option in all Rwandan regions: GridBuilt-SHSDom

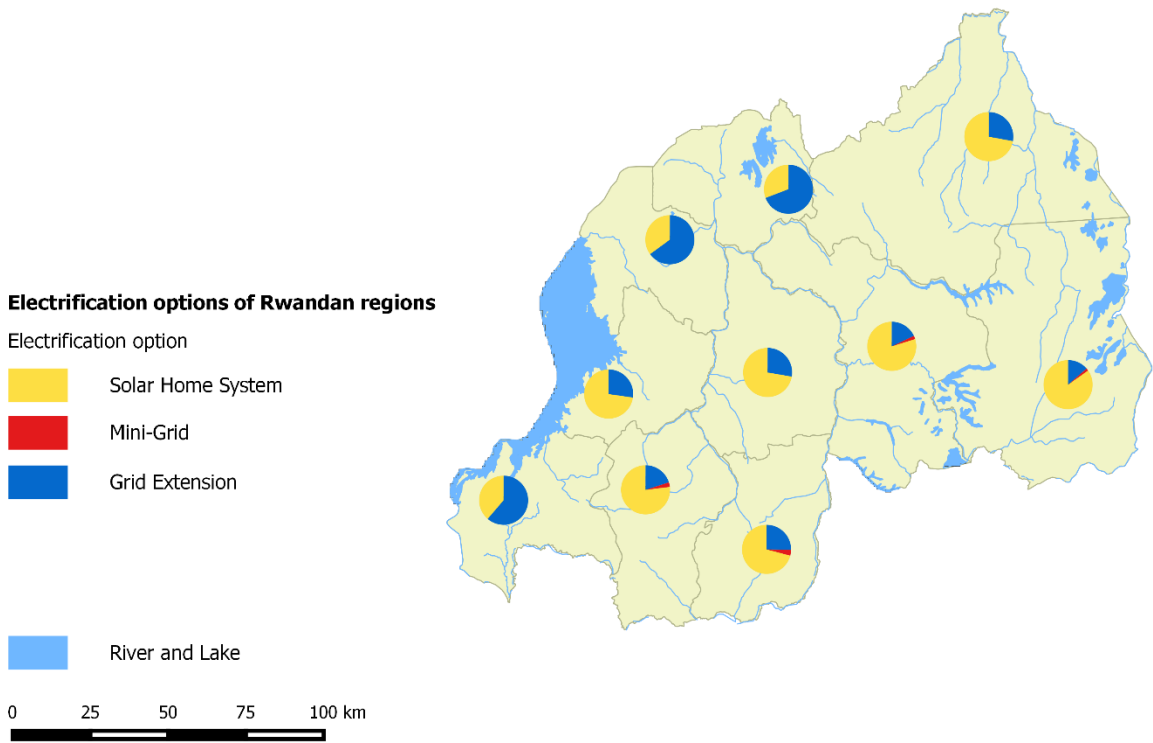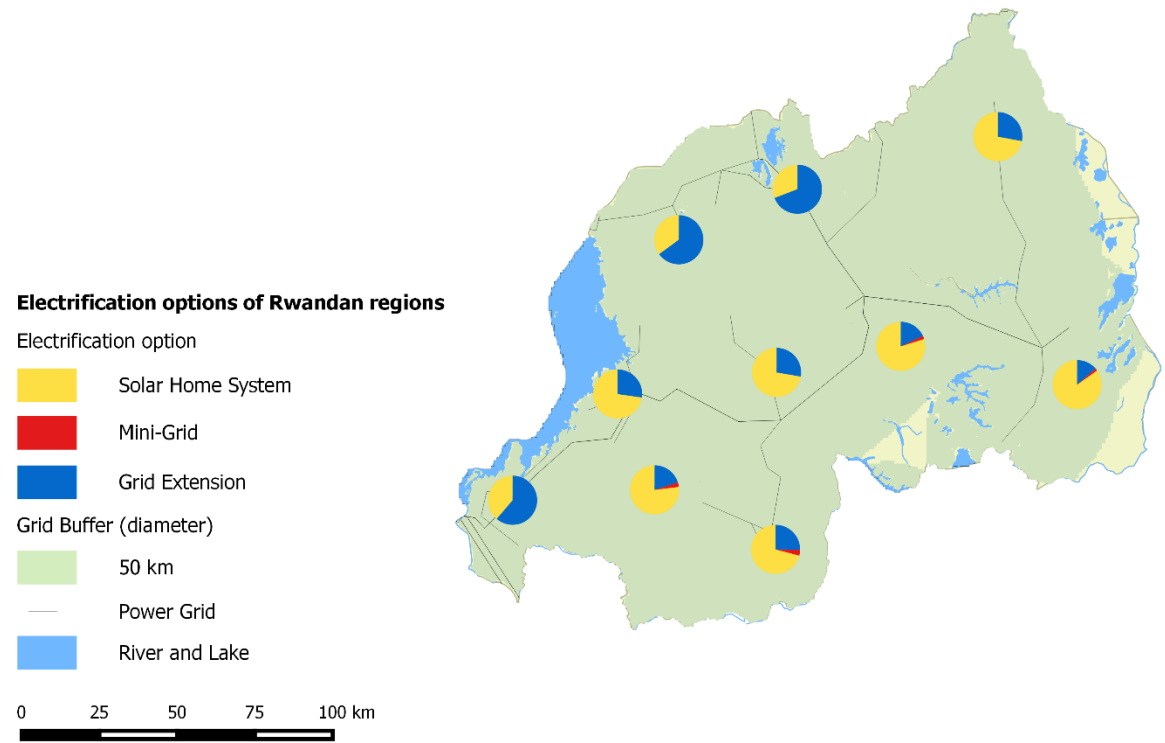

# Electrification option: GridBuilt-SHSDom

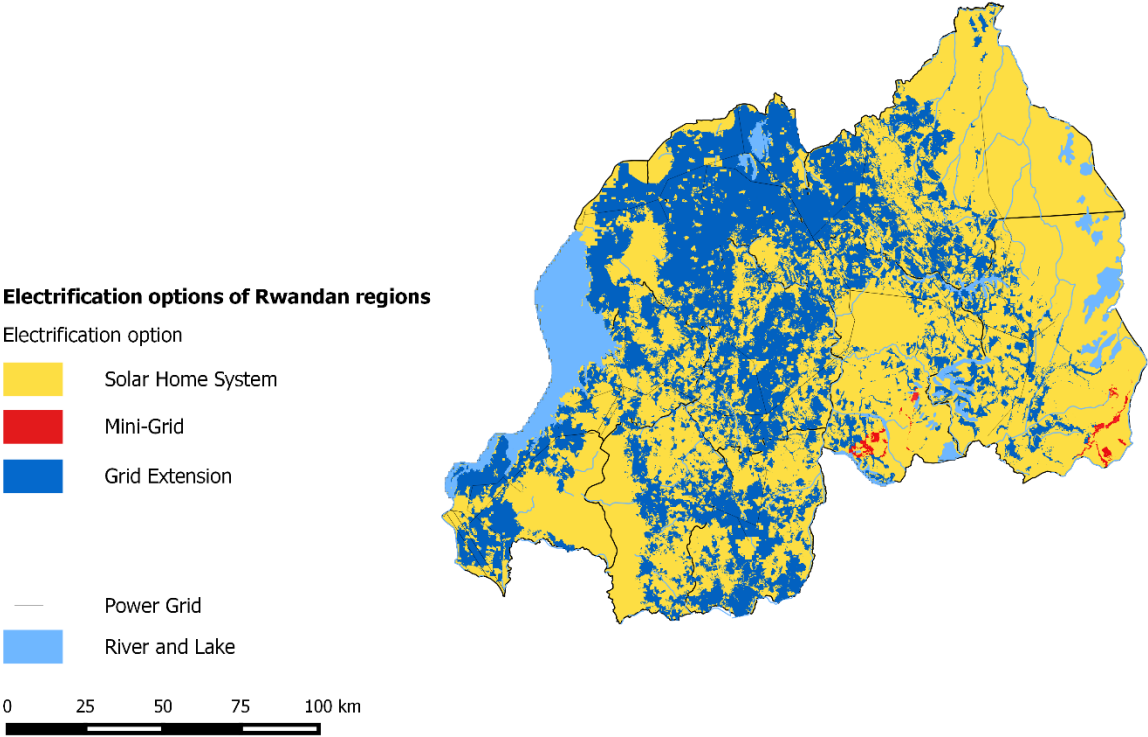

# Electrification option: GridBuilt-GridDom

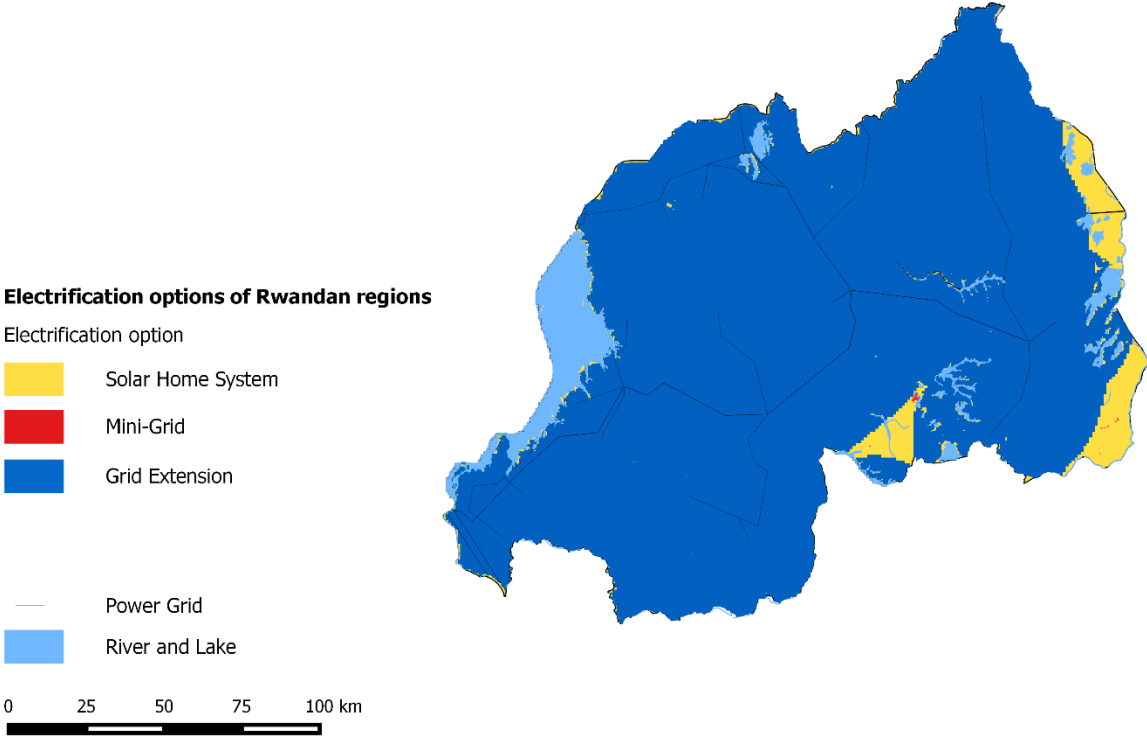

Share of electrification options in all Rwandan regions

GridBuilt-GridDom

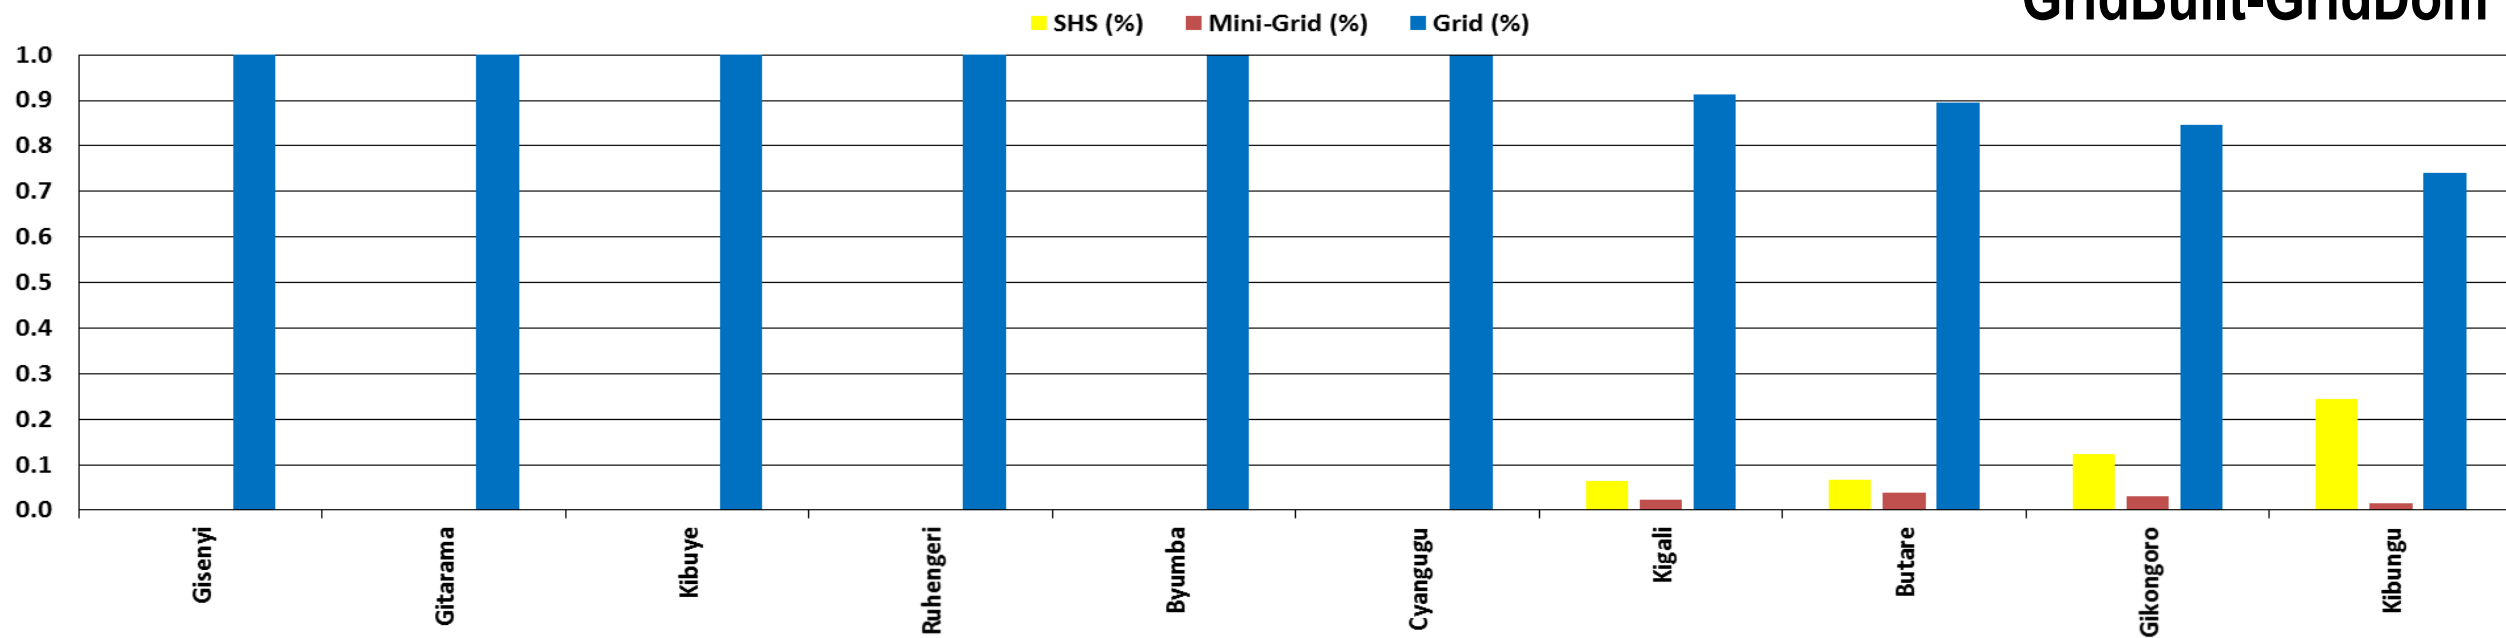

Share of electrification options in all Rwandan regions

GridBuilt-SHSDom

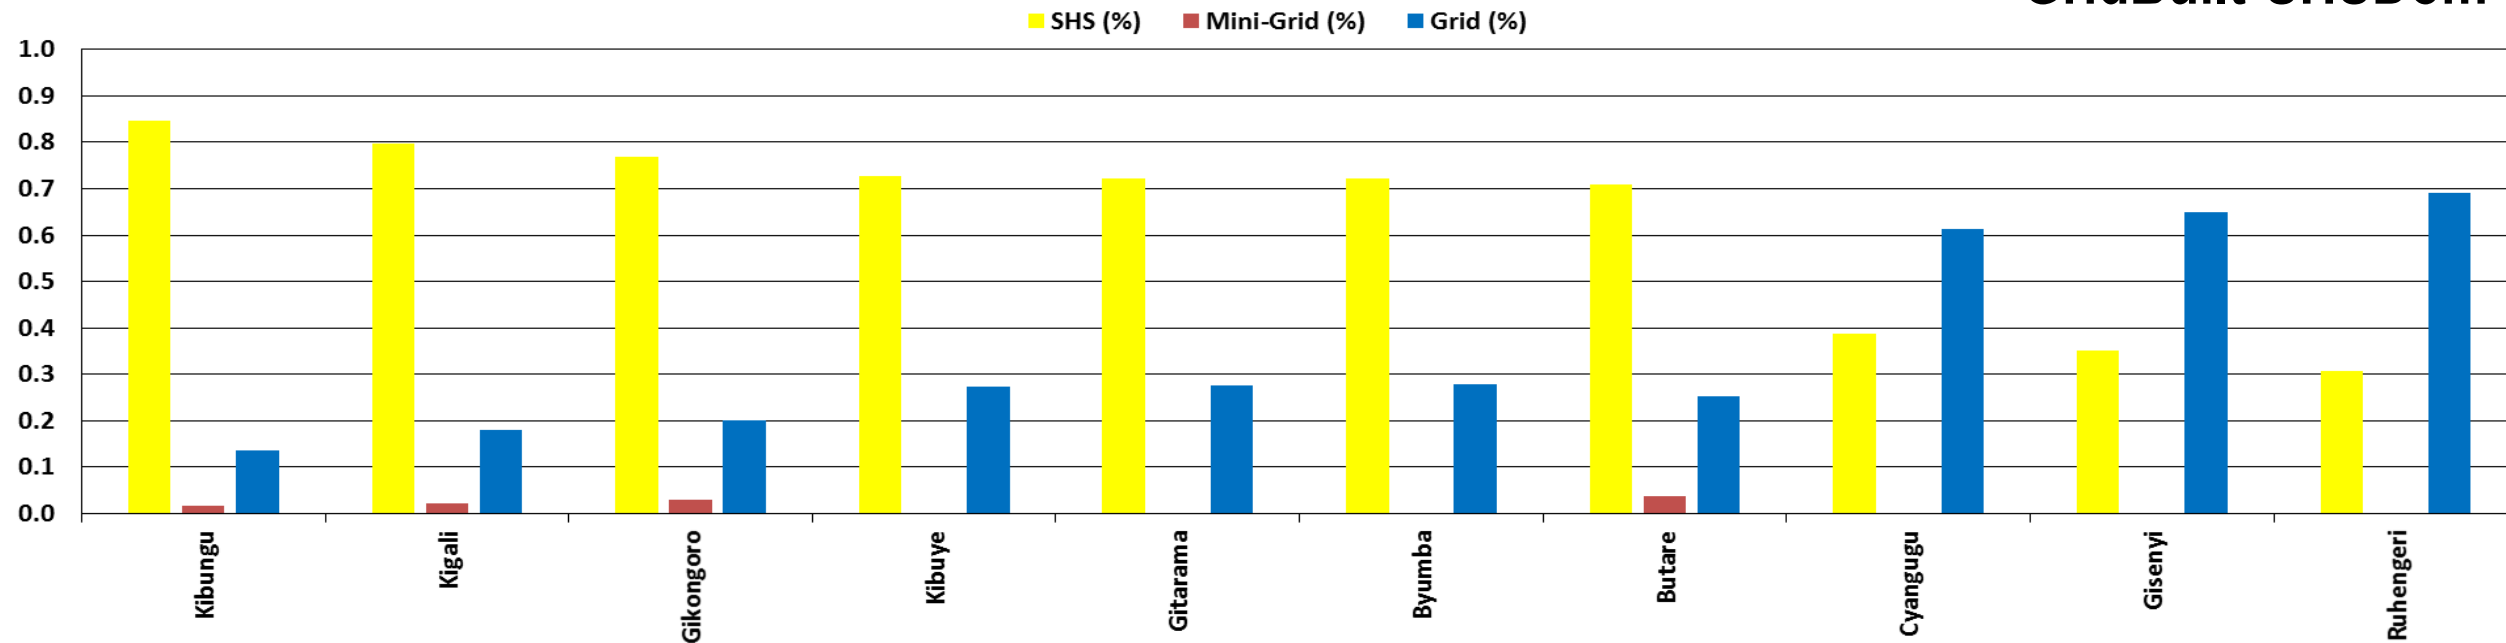

# Electrification option in all Rwandan regions: GridPlanned-GridDom

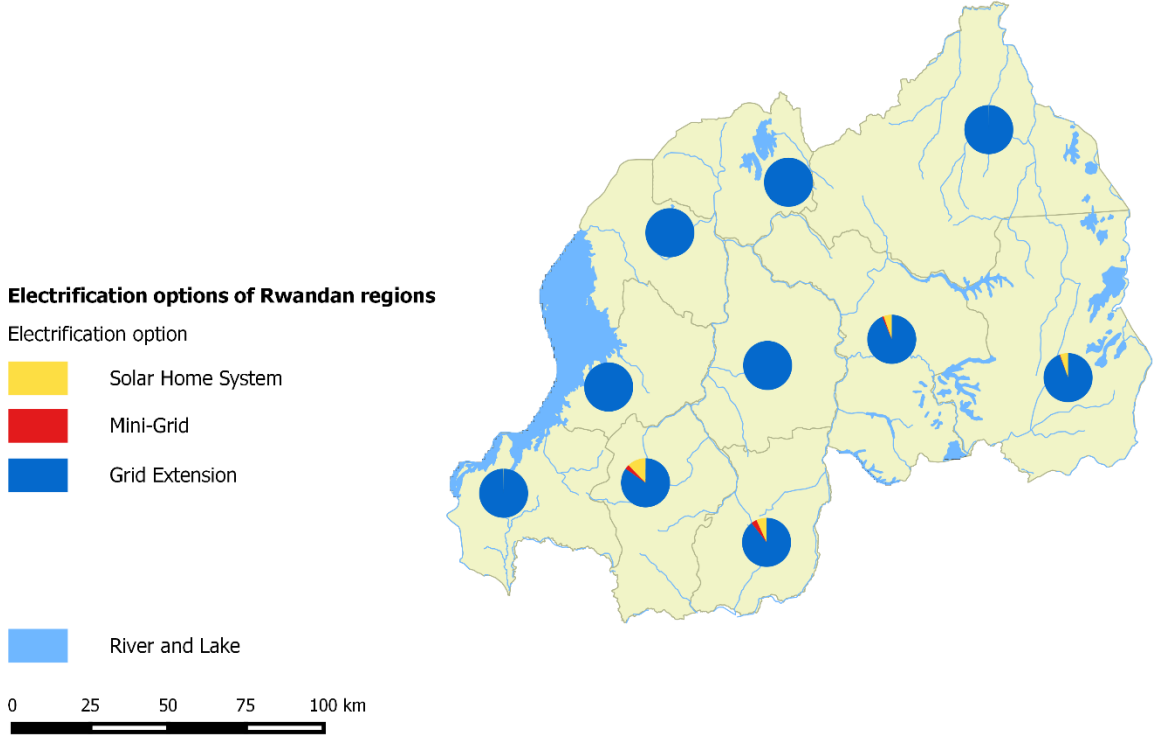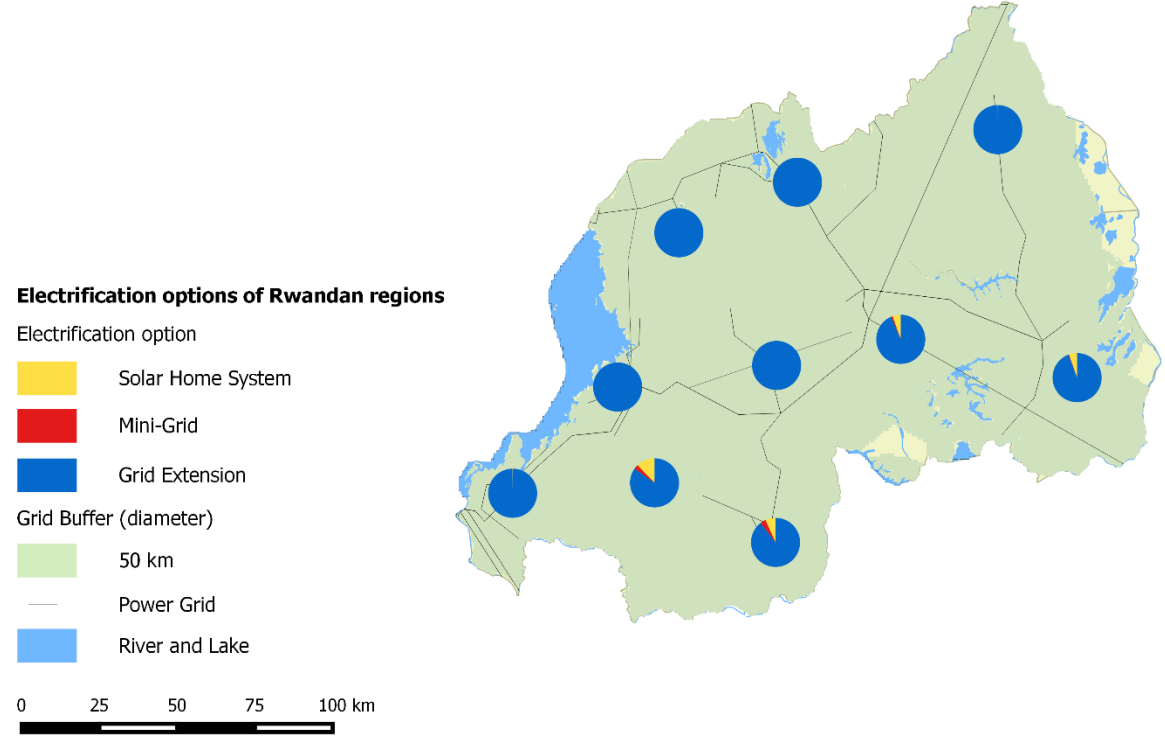

# Electrification option in all Rwandan regions: GridPlanned-SHSDom

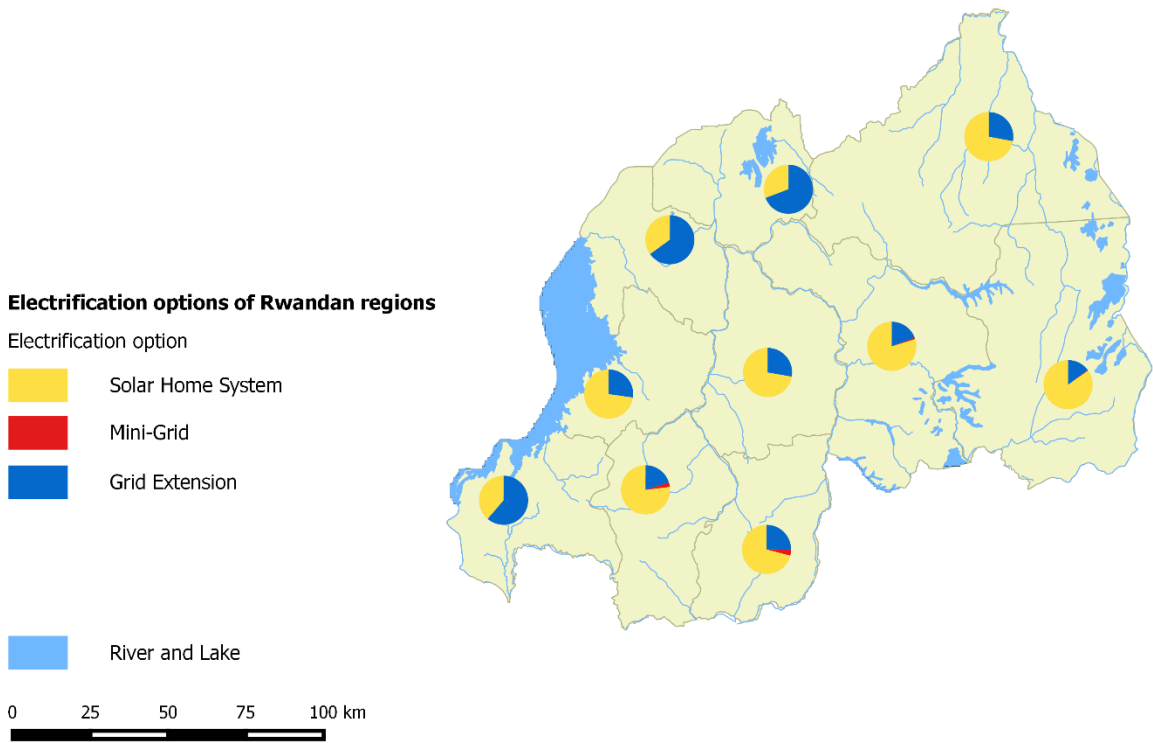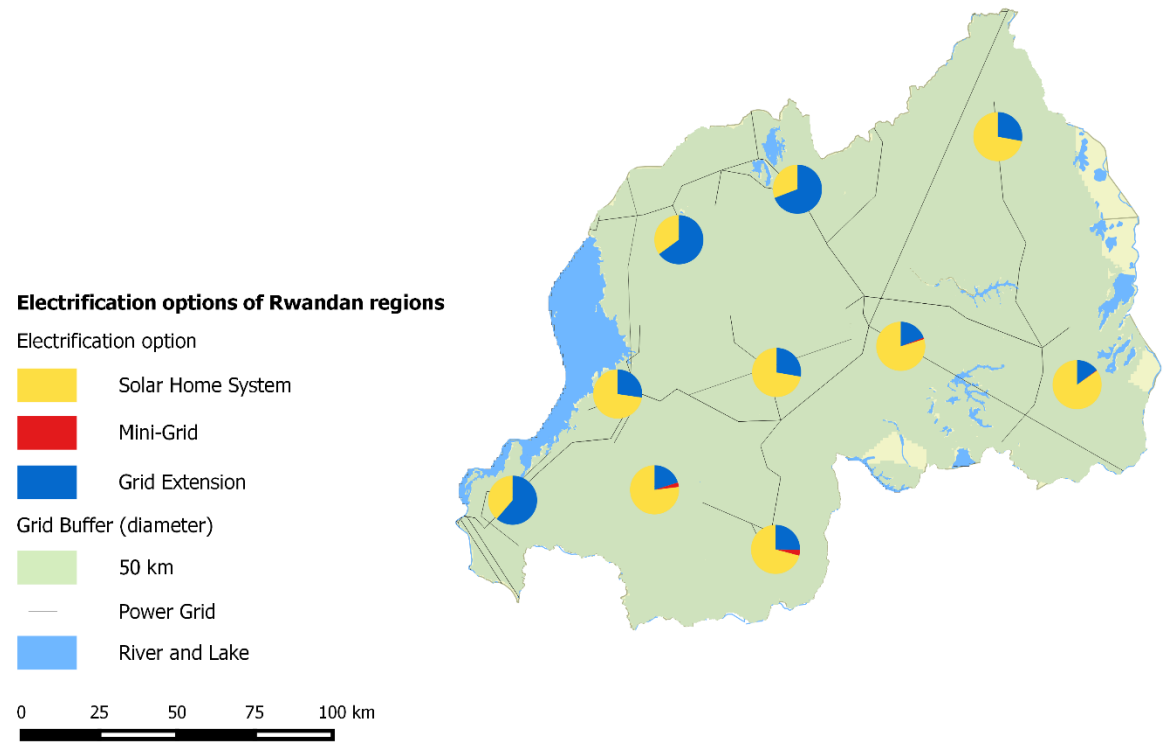

# Electrification option: GridPlanned-SHSDom

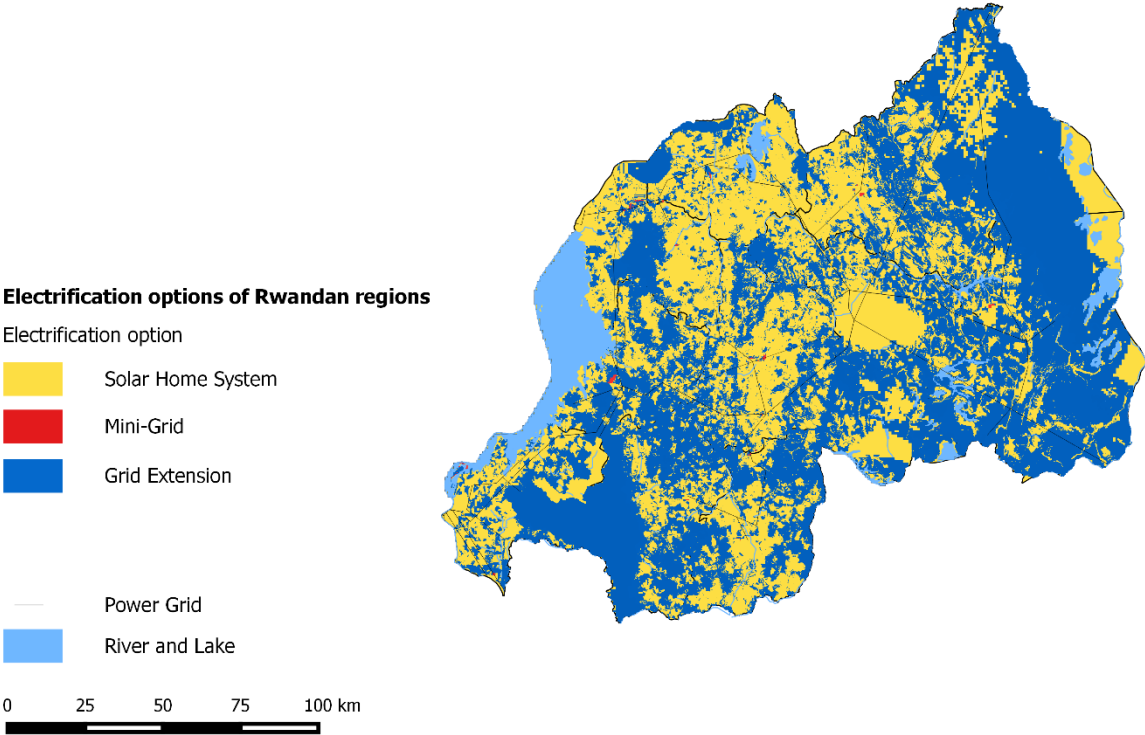

# Electrification option: GridPlanned-GridDom

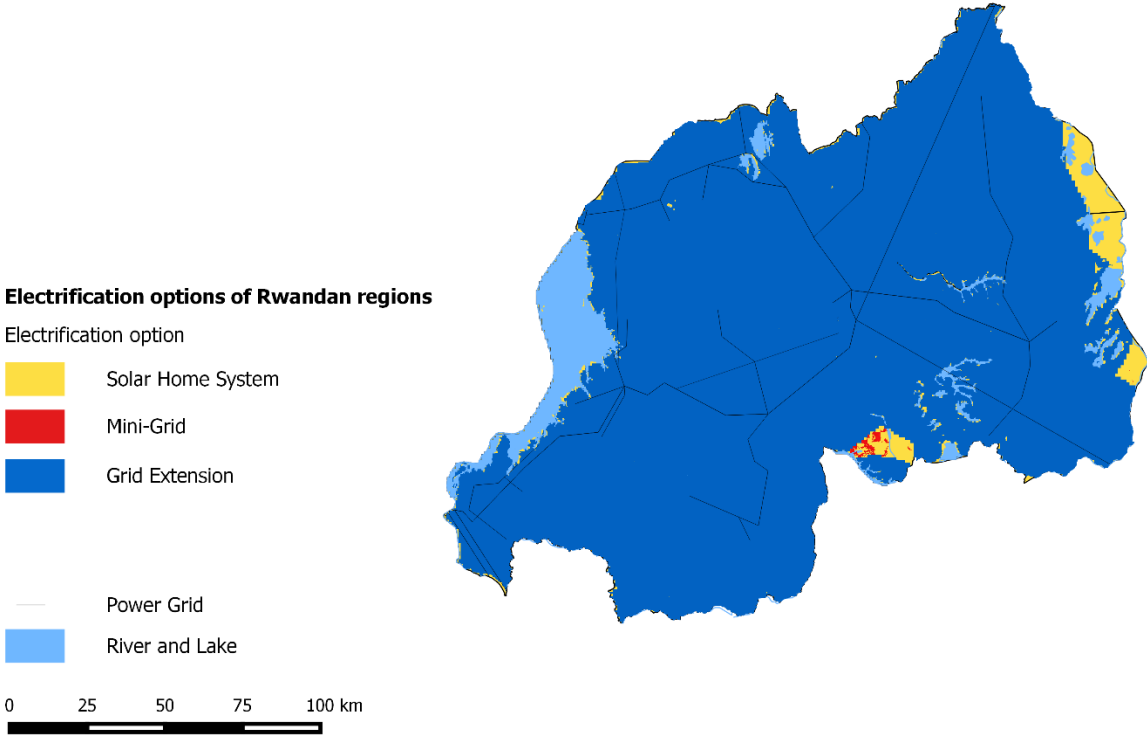

Share of electrification options in all Rwandan regions

GridPlanned-GridDom

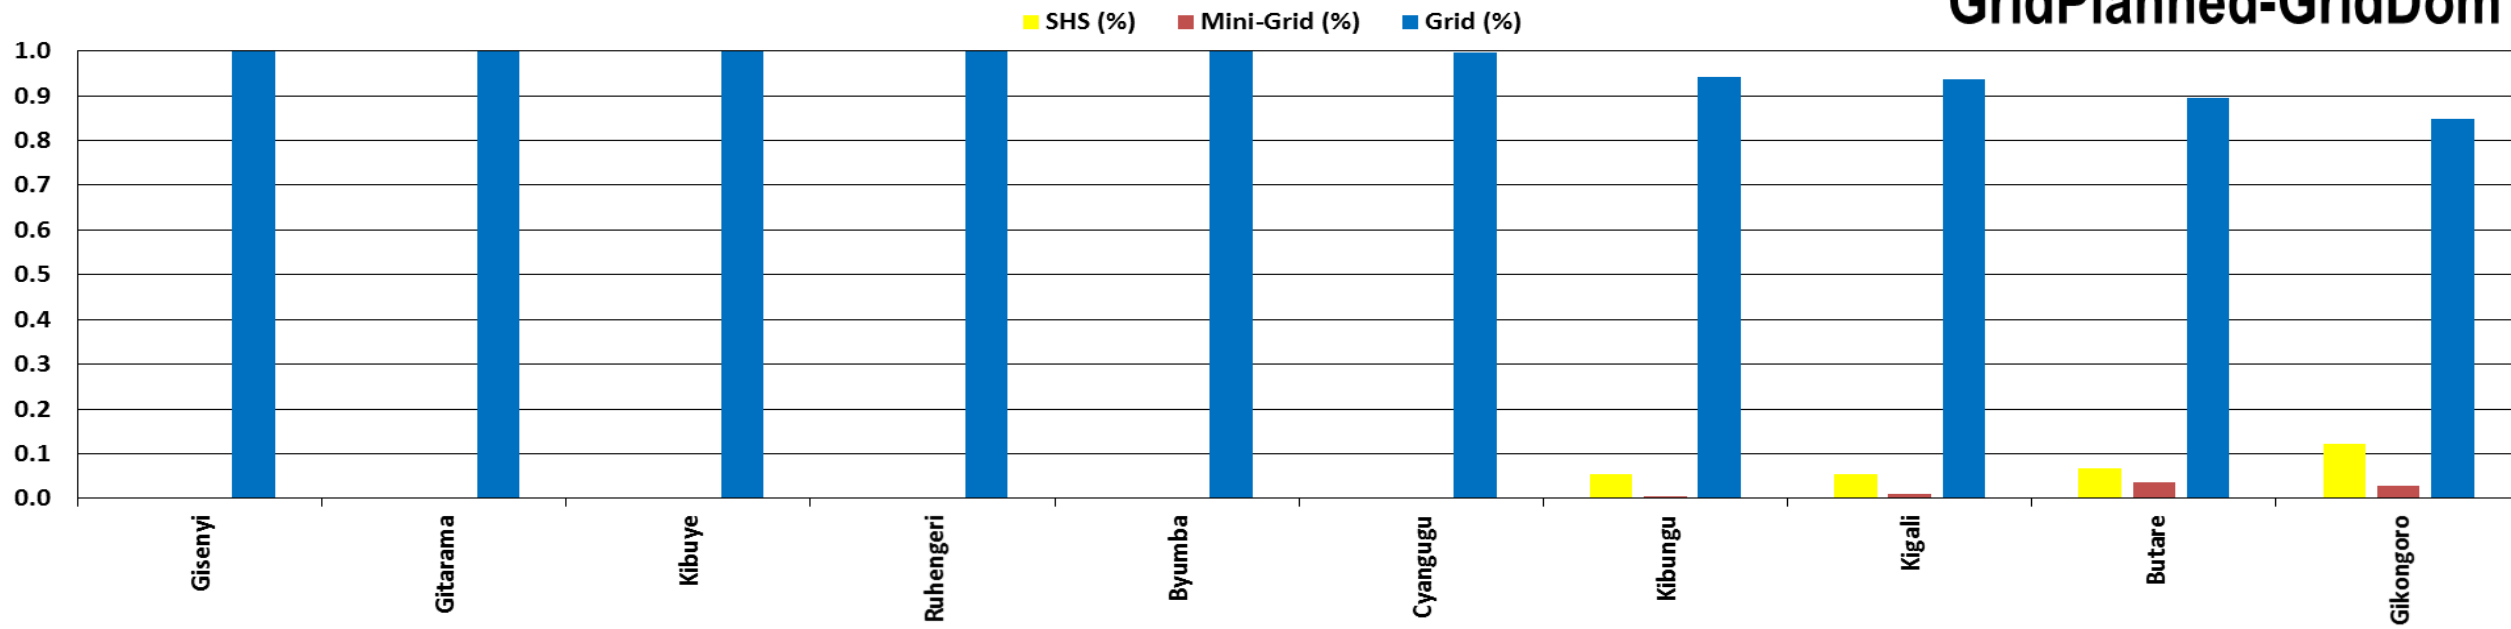

Share of electrification options in all Rwandan regions

GridPlanned-SHSDom

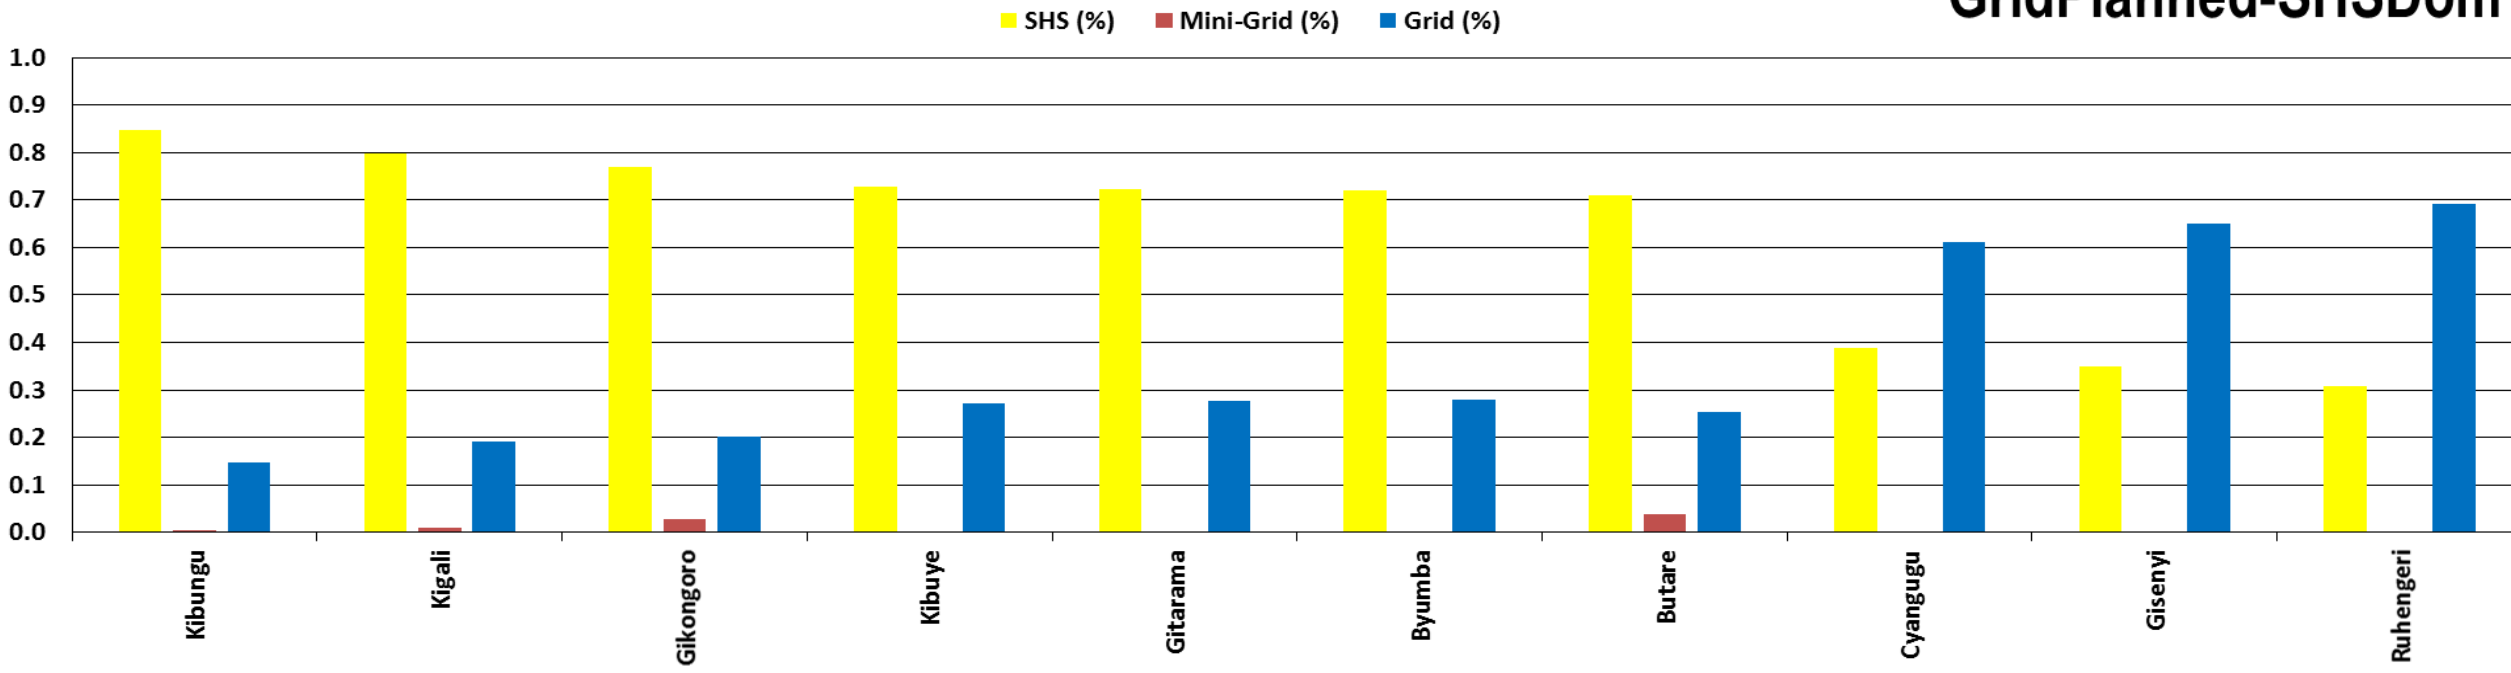

# Somalia

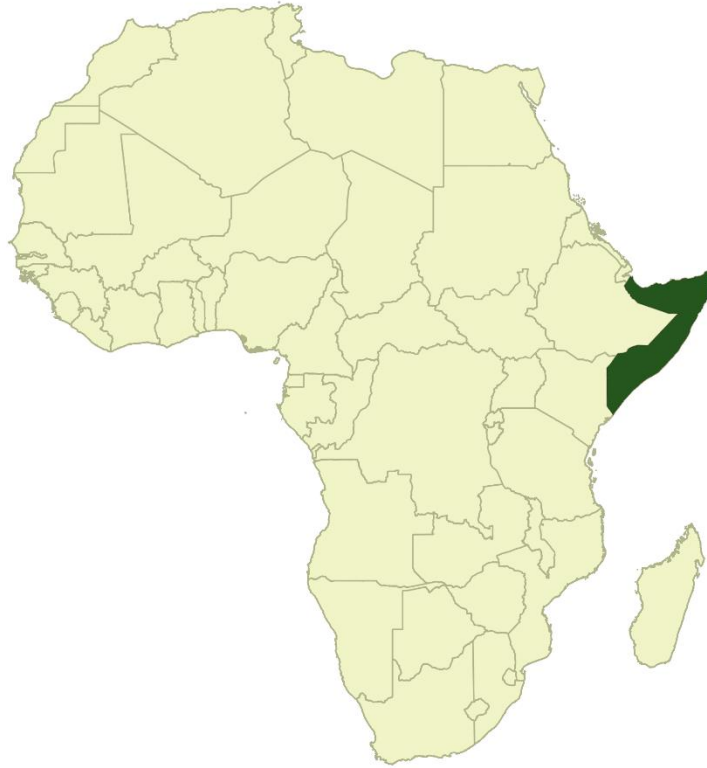

# Night light emission and Population of Somalian regions

## Night light emission in Somalia

Detected night lights

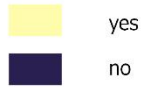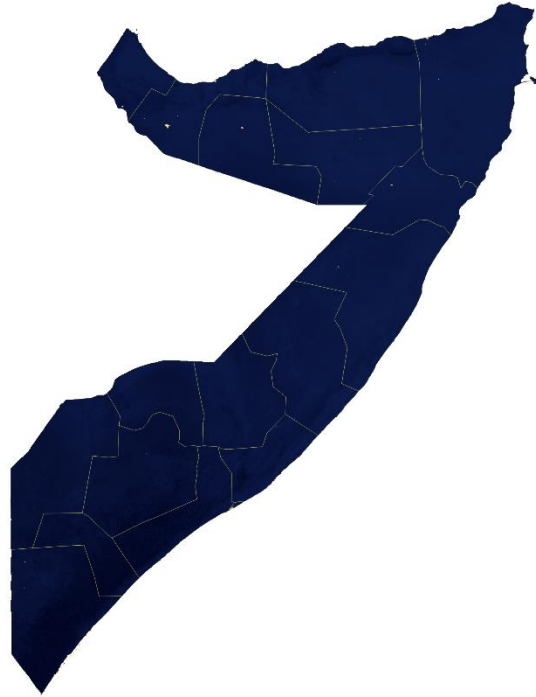

0 100 200 300 400 km

## Population structure of Somalia

Population density (people/750x750m<sup>2</sup>)

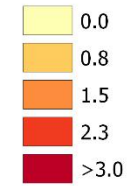

River and Lake (blue)

0 100 200 300 400 km

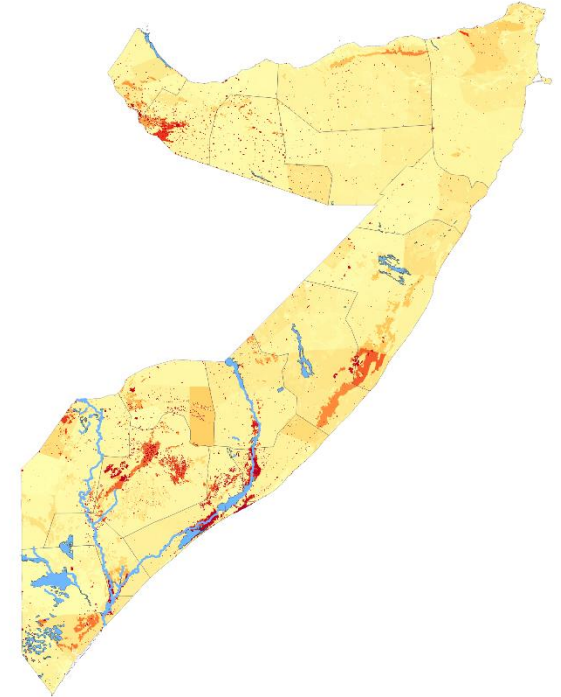

# Electrification option in all Somalian regions: GridBuilt-GridDom

## Electrification options of Somalian regions

Electrification option

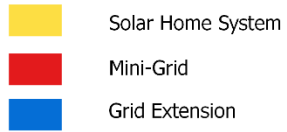

River and Lake

0 100 200 300 400 km

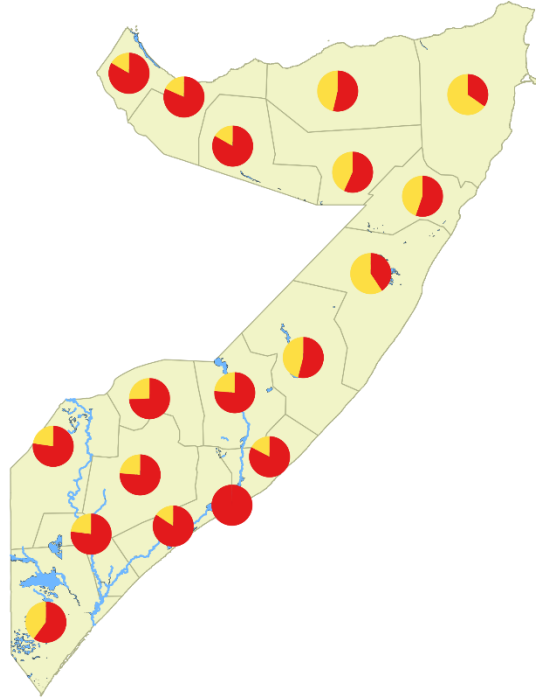

## Electrification options of Somalian regions

Electrification option

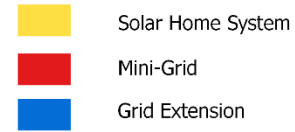

Grid Buffer (diameter)

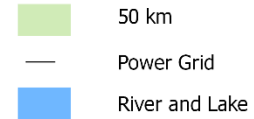

0 100 200 300 400 km

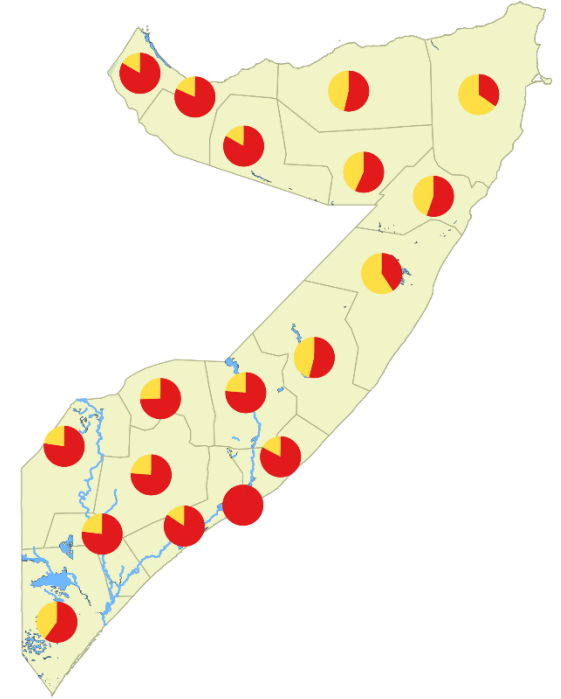

# Electrification option in all Somalian regions: GridBuilt-SHSDom

## Electrification options of Somalian regions

Electrification option

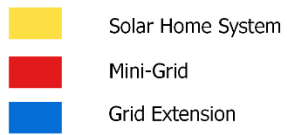

River and Lake

0 100 200 300 400 km

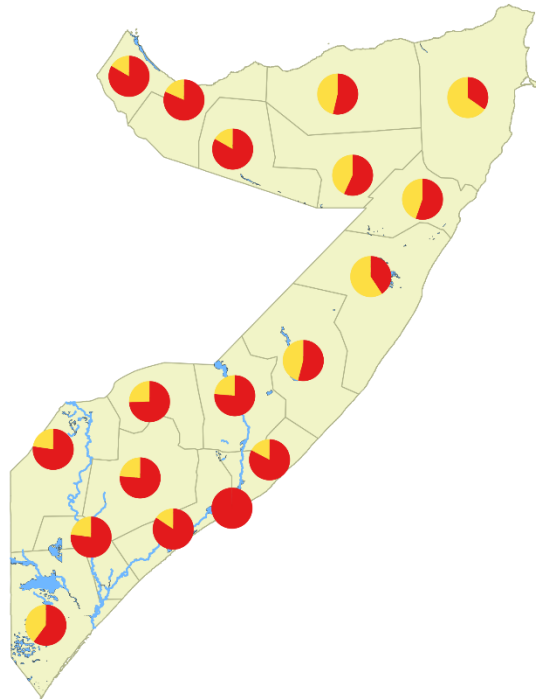

## Electrification options of Somalian regions

Electrification option

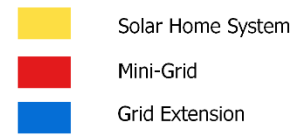

Grid Buffer (diameter)

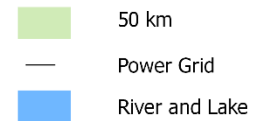

0 100 200 300 400 km

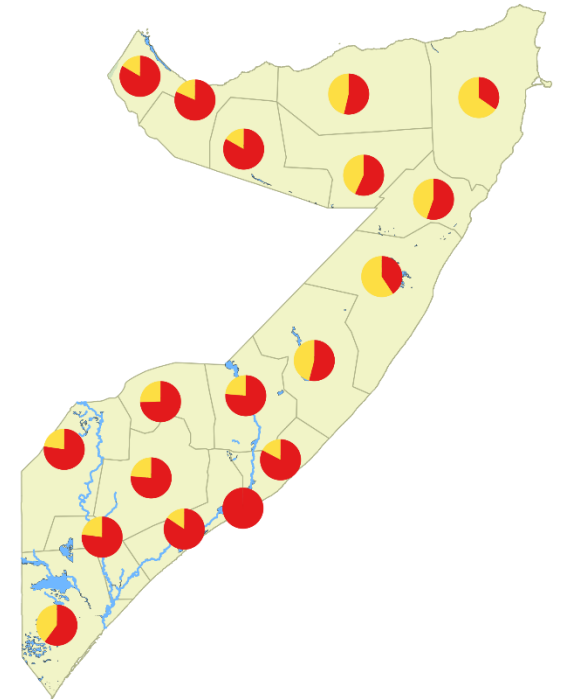

# Electrification option: GridBuilt-SHSDom

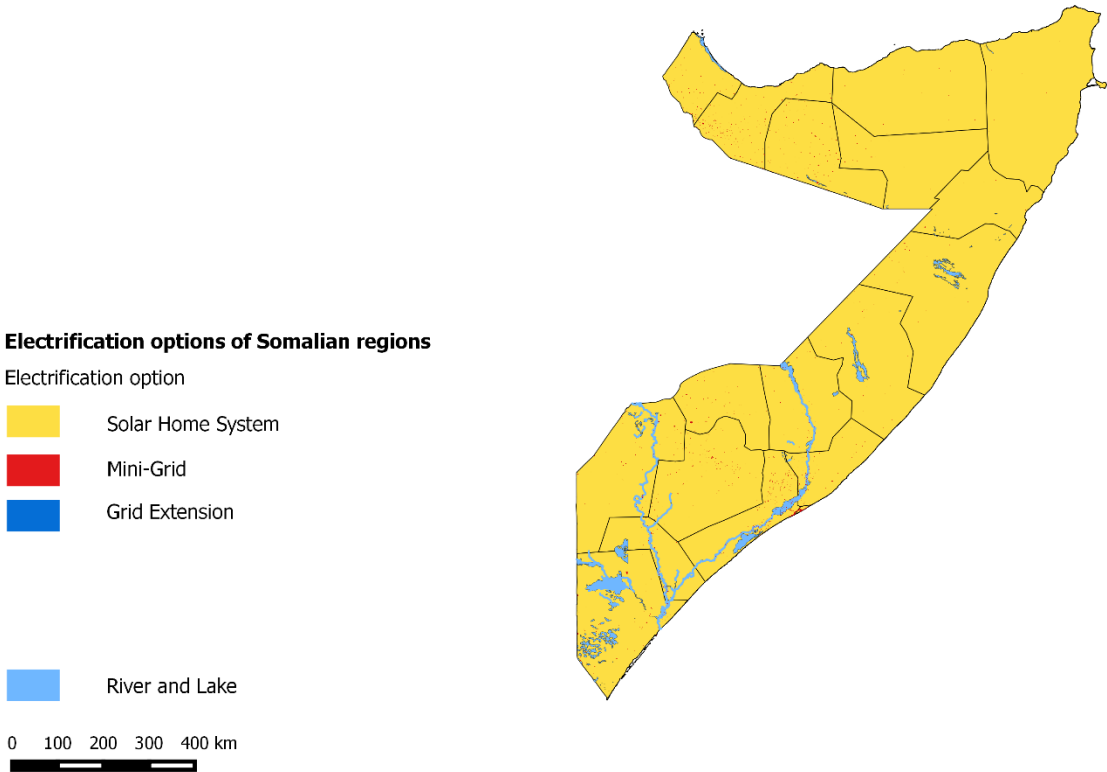

# Electrification option: GridBuilt-GridDom

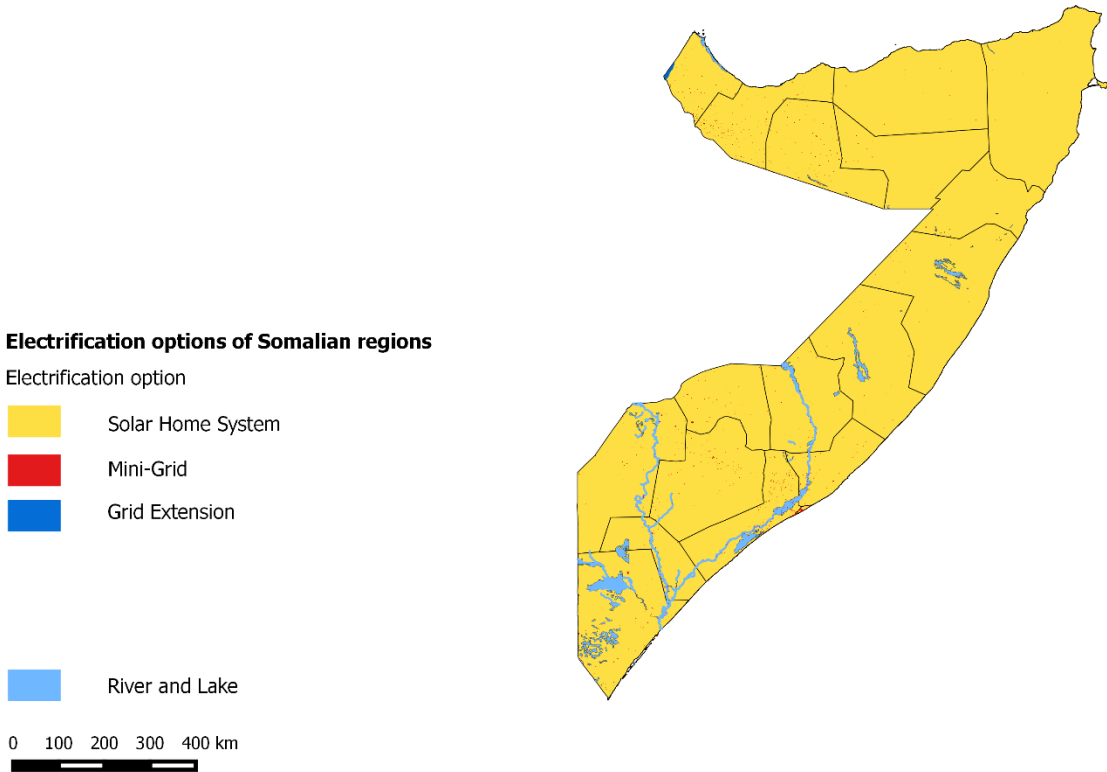

Share of electrification options in all Somalian regions

SHS (%) Mini-Grid (%) Grid (%)

GridBuilt-GridDom

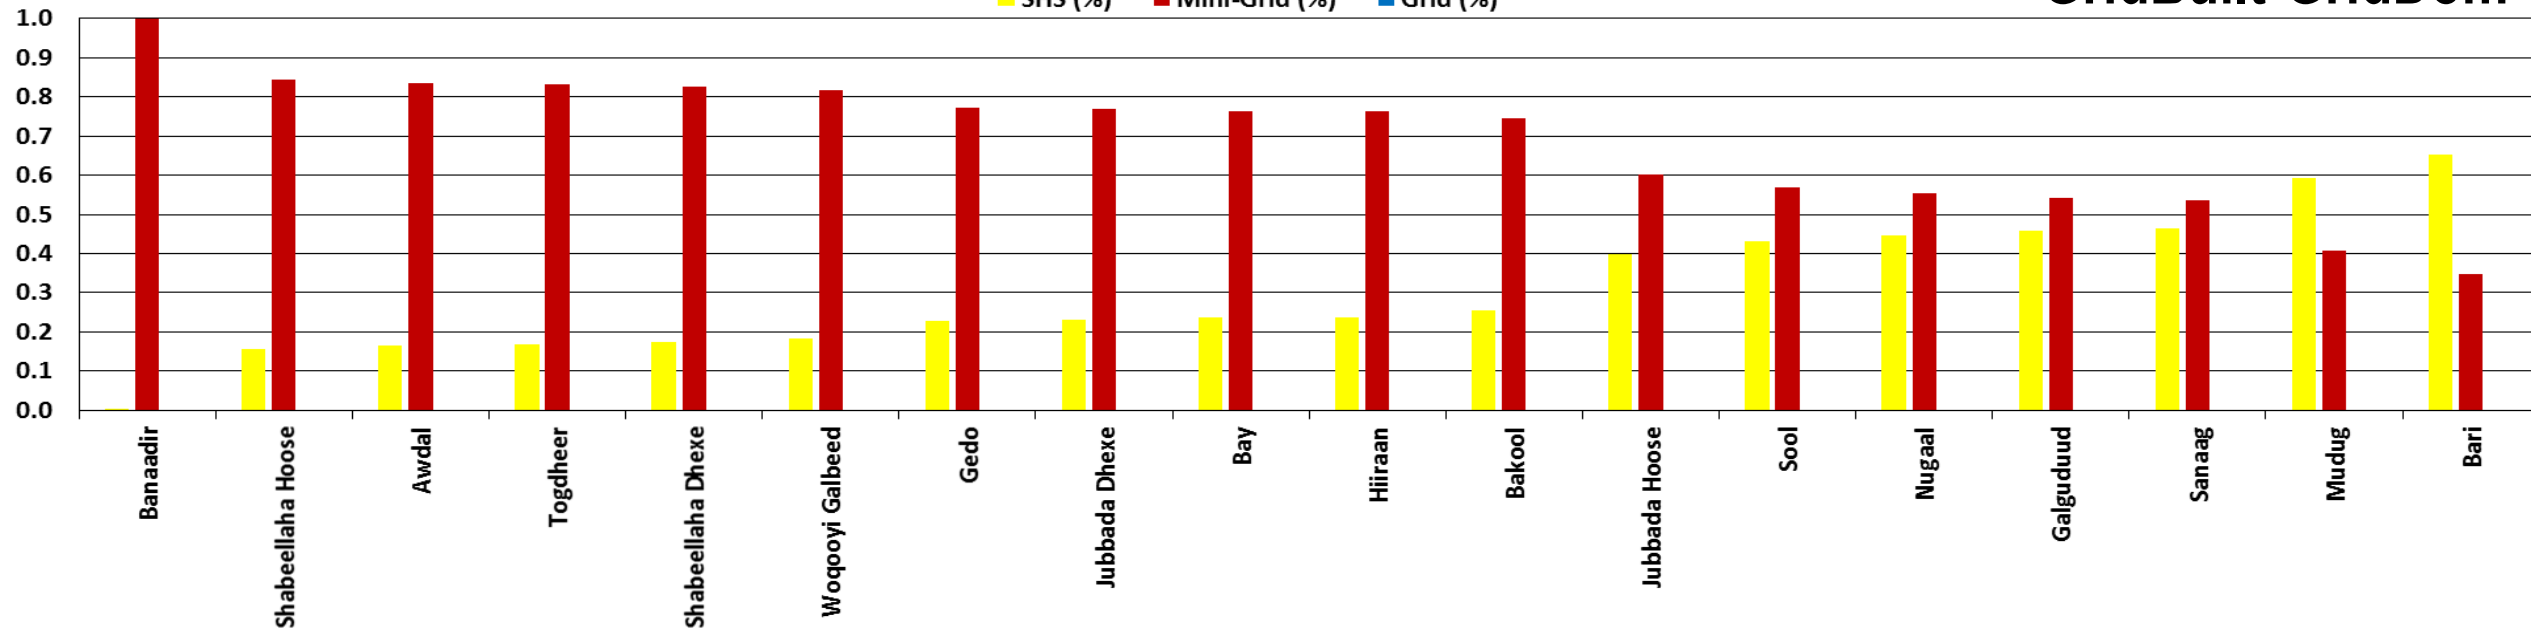

Share of electrification options in all Somalian regions

SHS (%) Mini-Grid (%) Grid (%)

GridBuilt-SHSDom

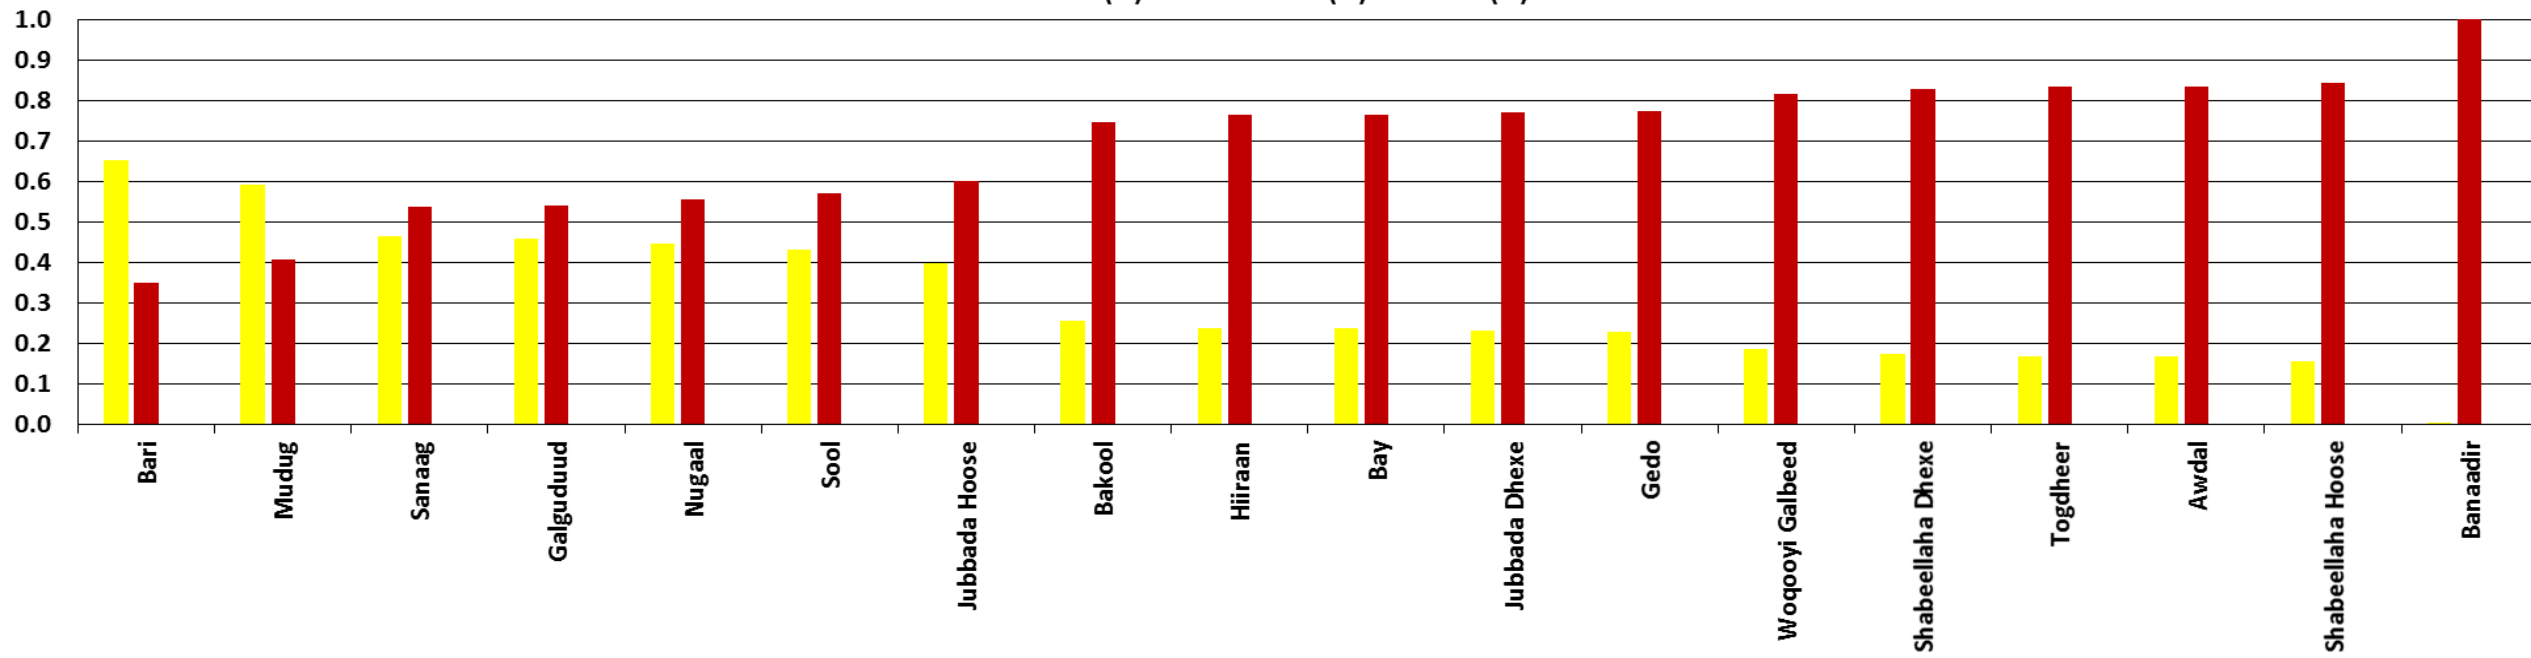

# Electrification option in all Somalian regions: GridPlanned-GridDom

## Electrification options of Somalian regions

Electrification option

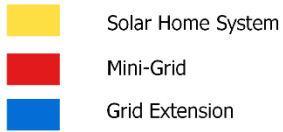

River and Lake

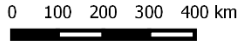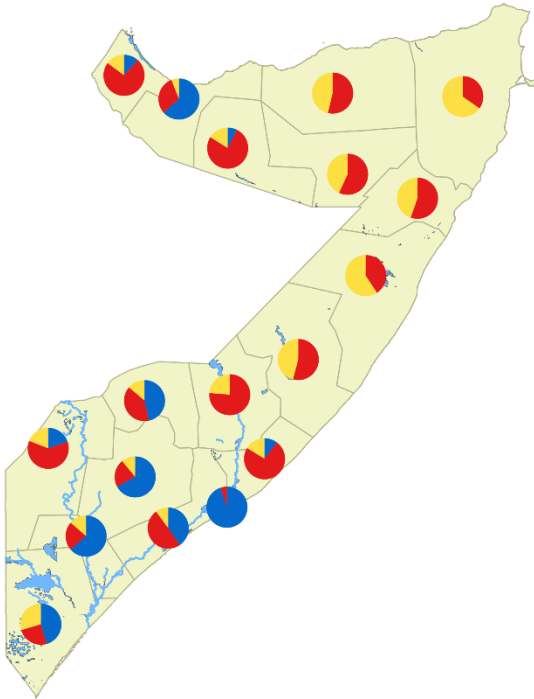

## Electrification options of Somalian regions

Electrification option

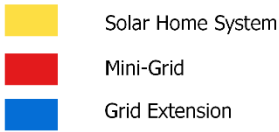

Grid Buffer (diameter)

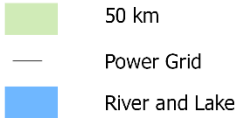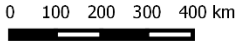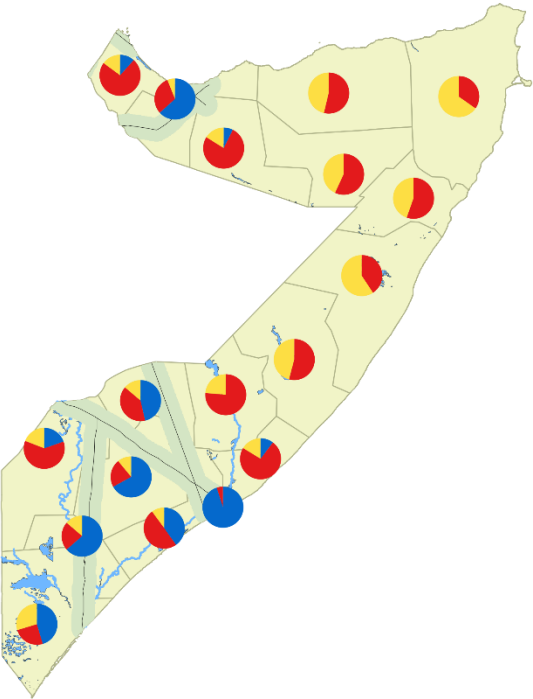

# Electrification option in all Somalian regions: GridPlanned-SHSDom

## Electrification options of Somalian regions

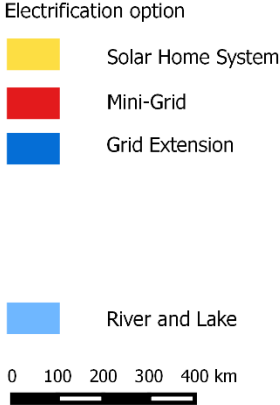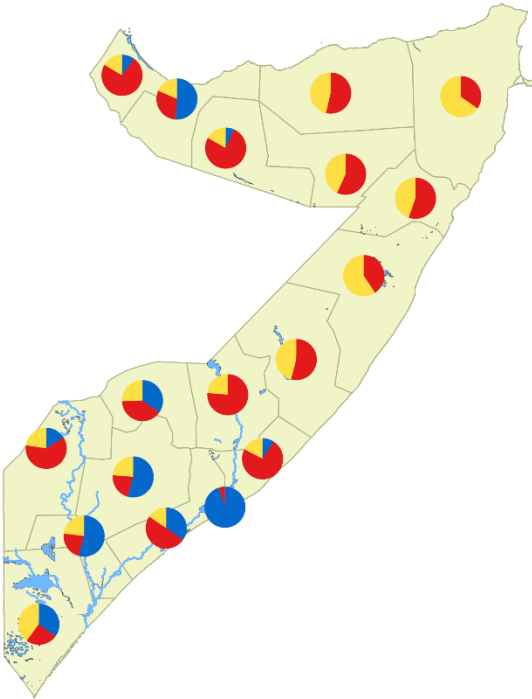

## Electrification options of Somalian regions

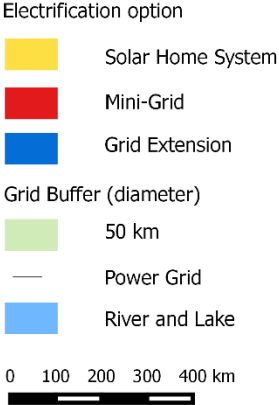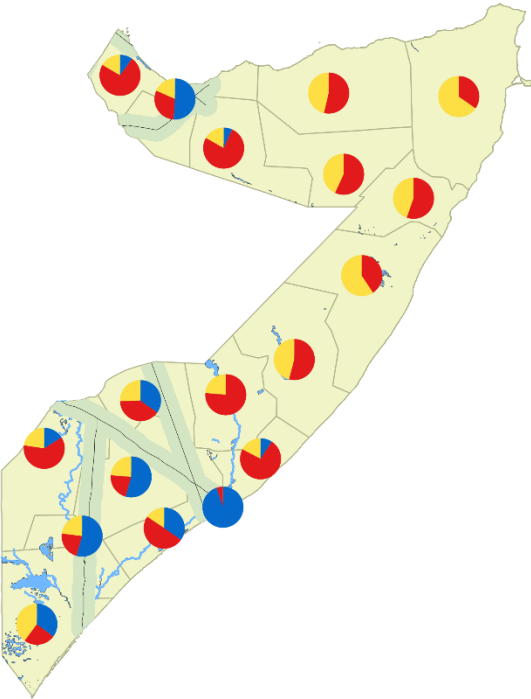

# Electrification option: GridPlanned-SHSDom

# Electrification option: GridPlanned-GridDom

Electrification options of Somalian regions

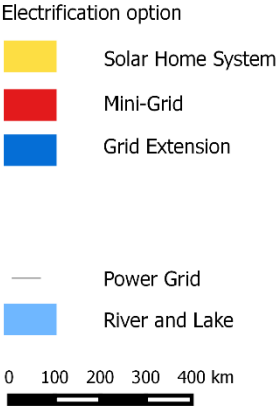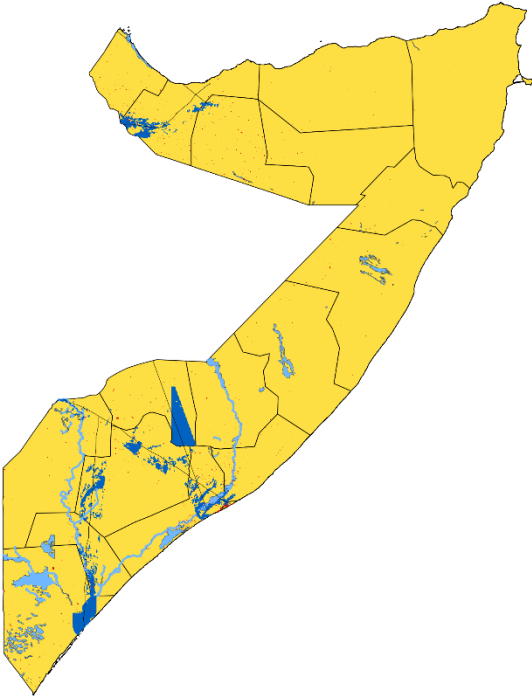

Electrification options of Somalian regions

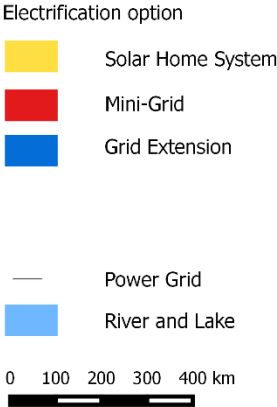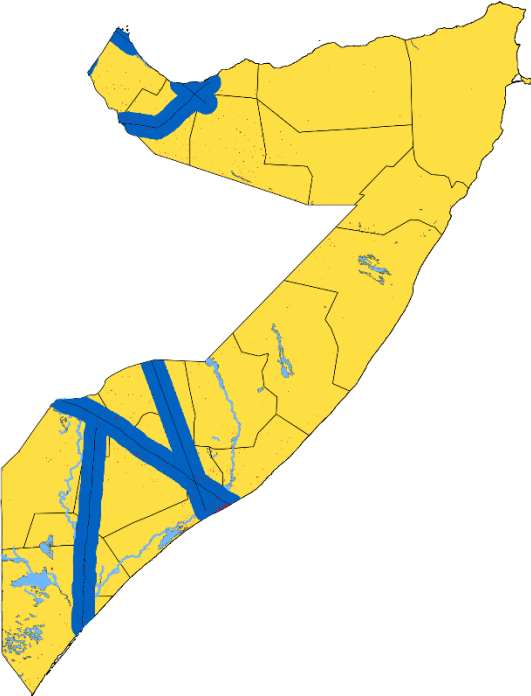

Share of electrifications options in all Somalian regions

GridPlanned-GridDom

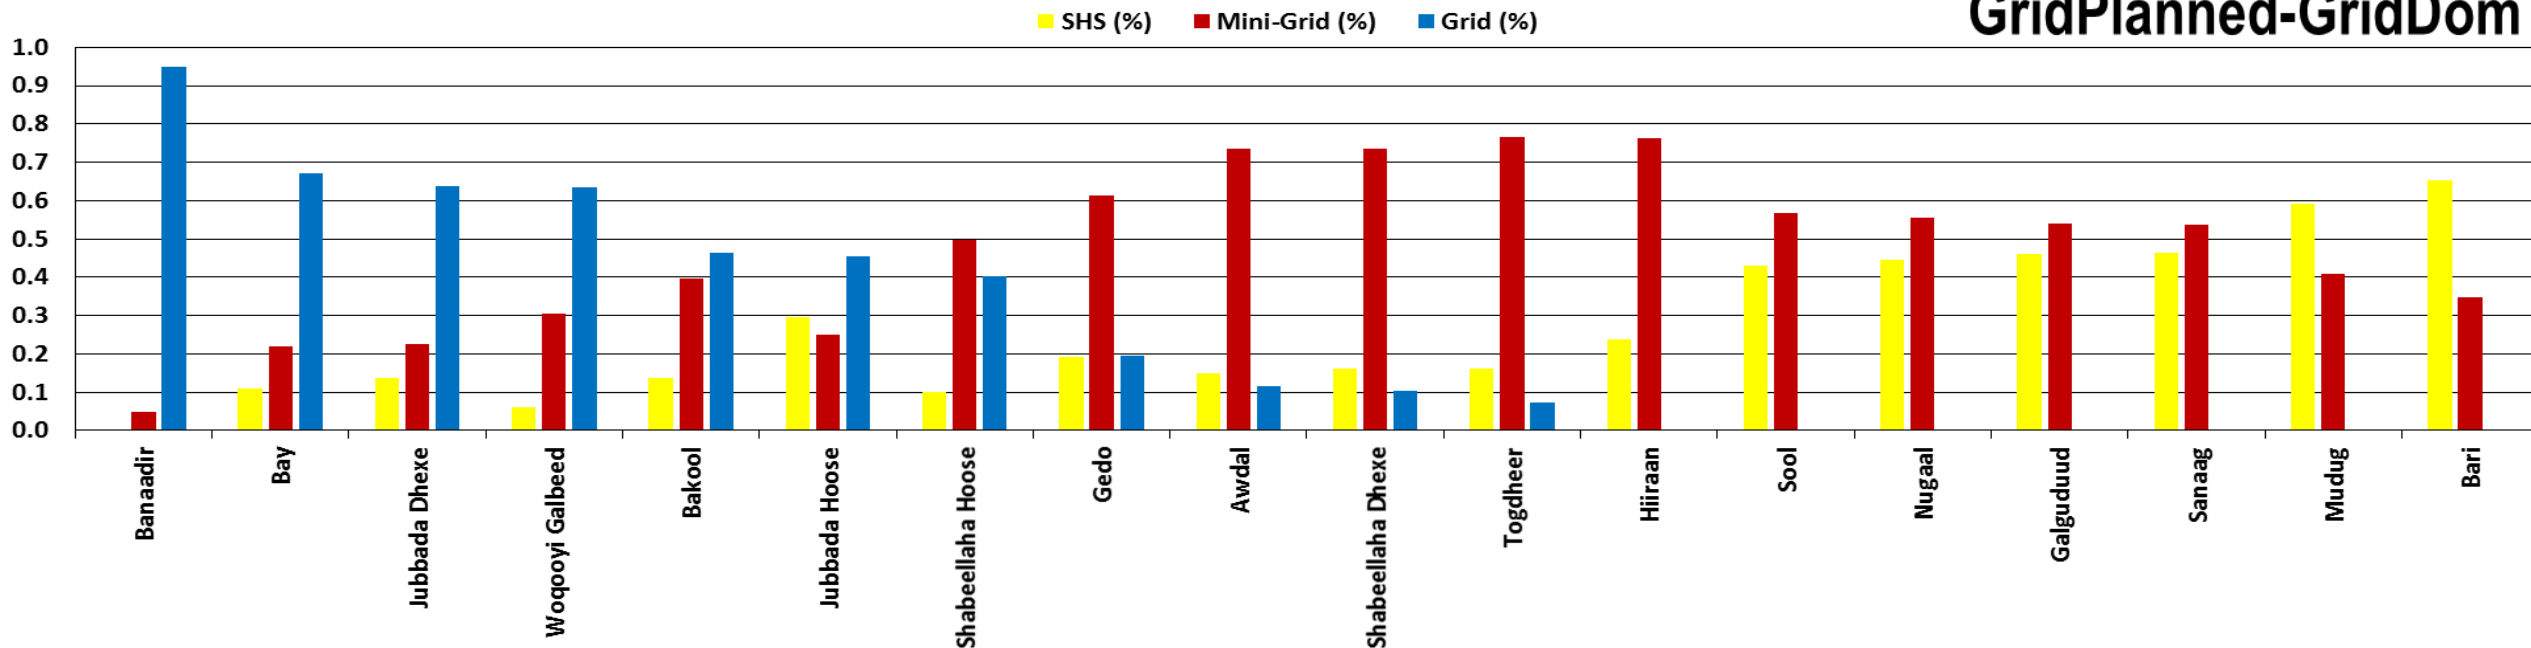

Share of electrification options in all Somalian regions

GridPlanned-SHSDom

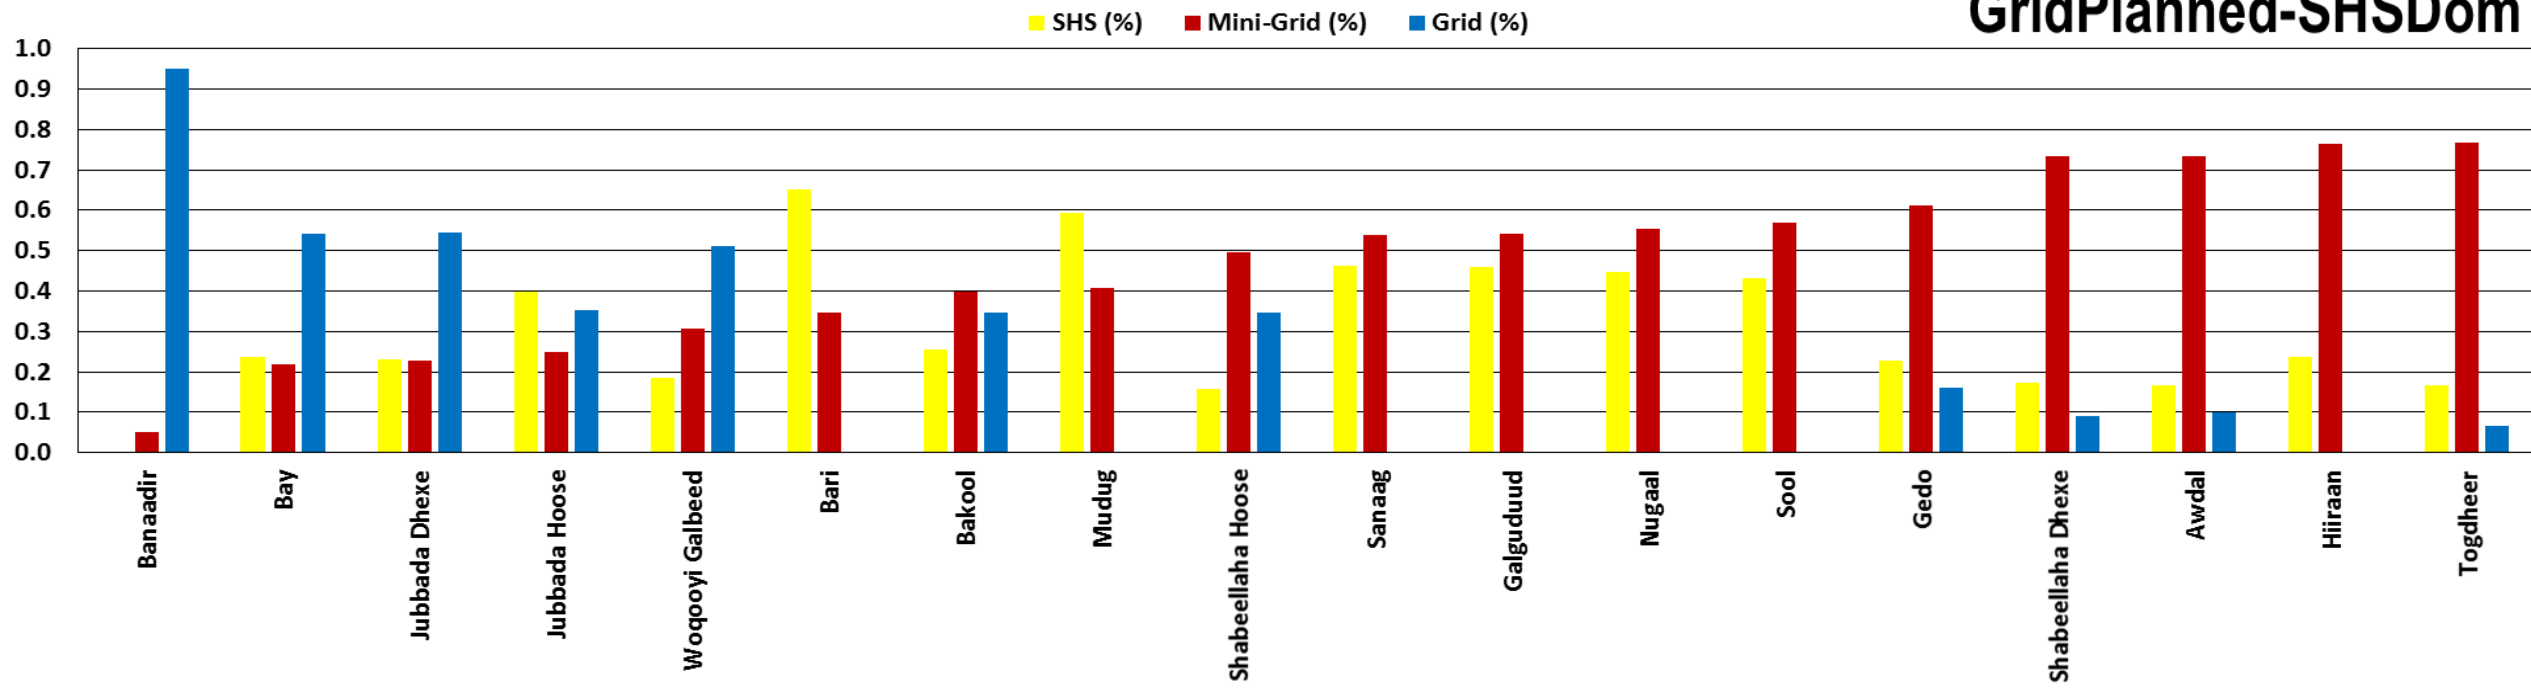

# South Sudan

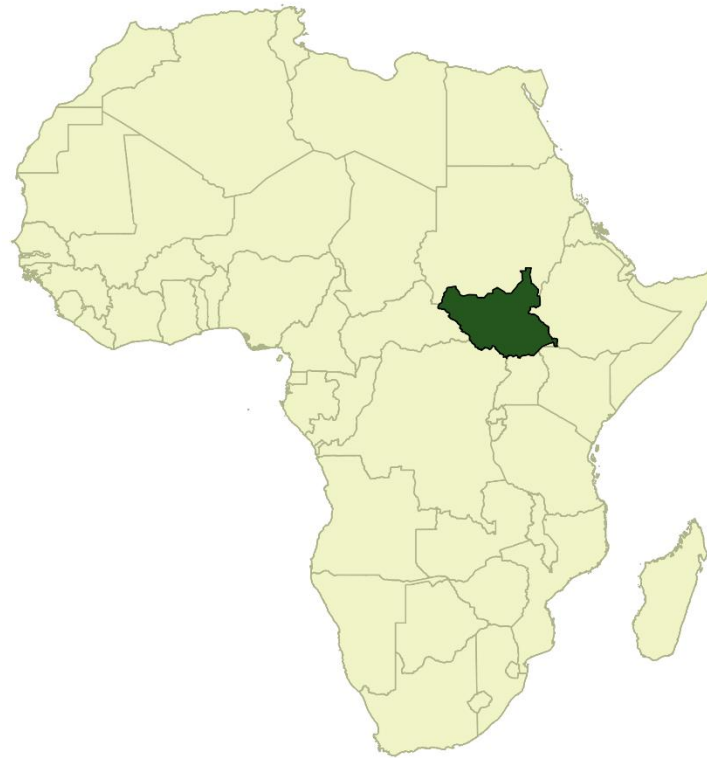

# Night light emission and Population of South Sudanese regions

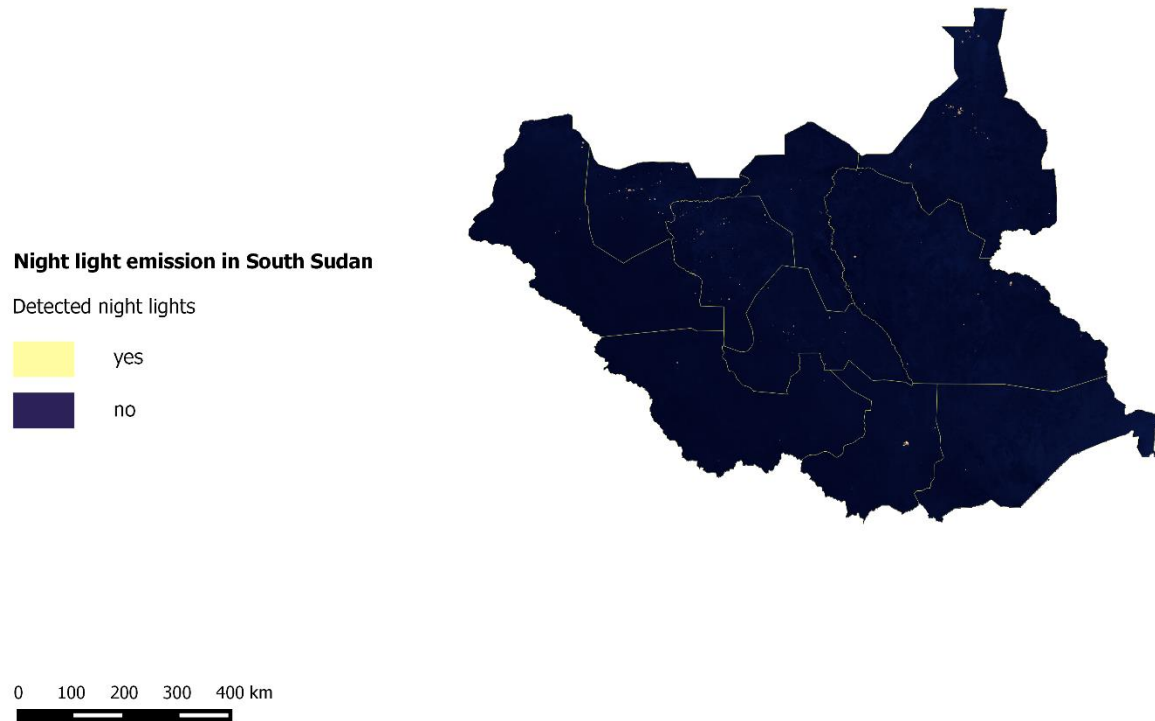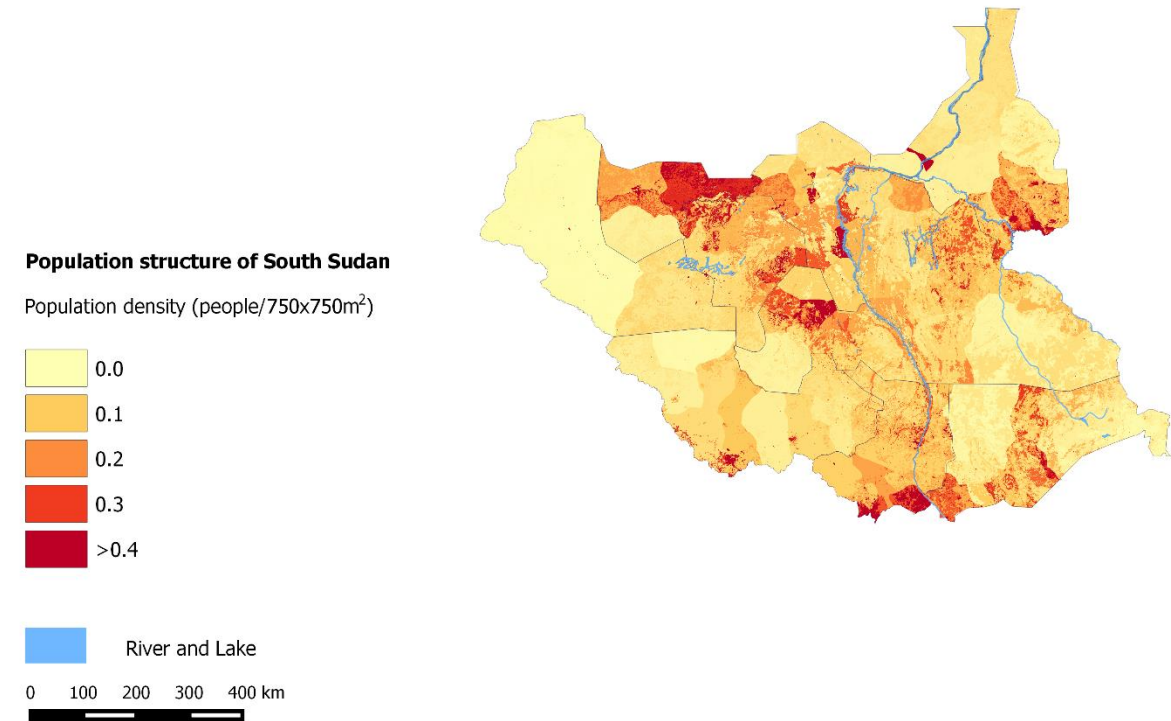

# Electrification option in all South Sudanese regions: GridBuilt-GridDom

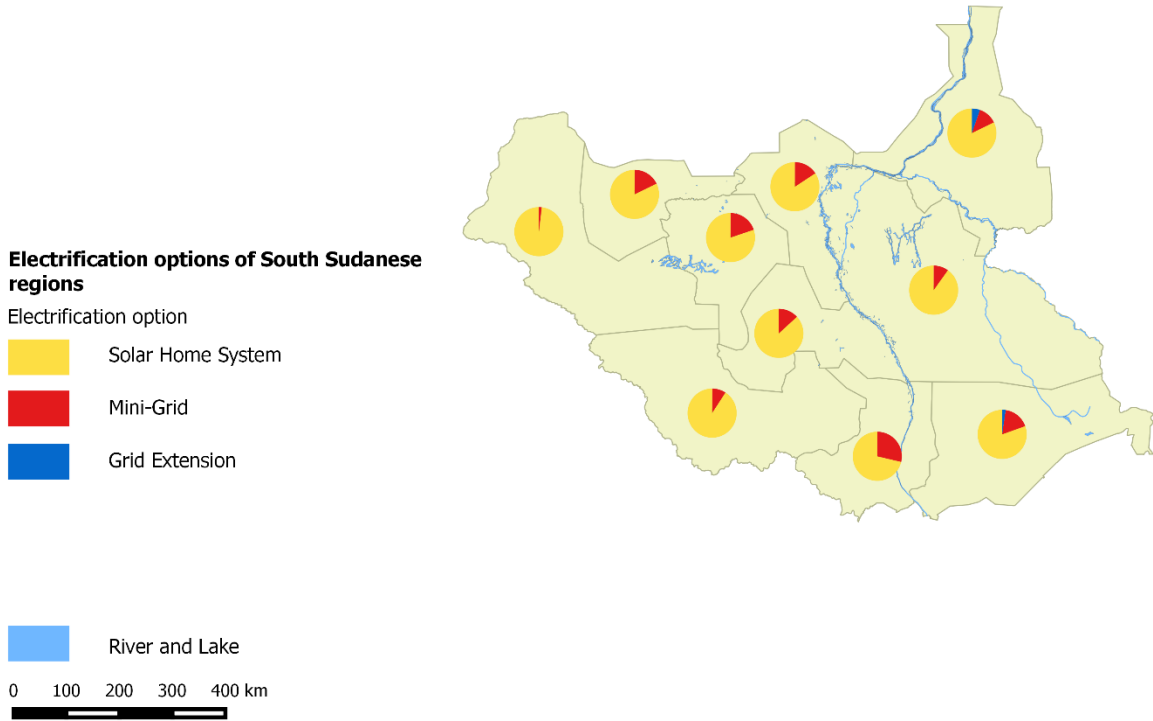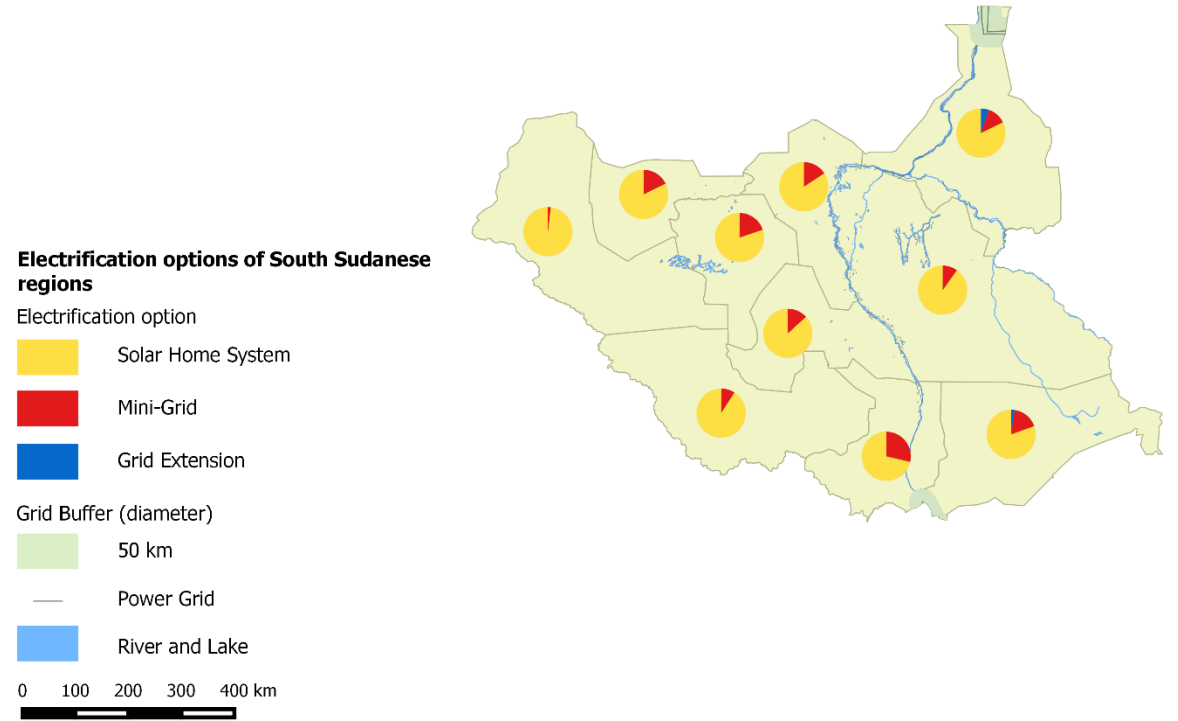

# Electrification option in all South Sudanese regions: GridBuilt-SHSDom

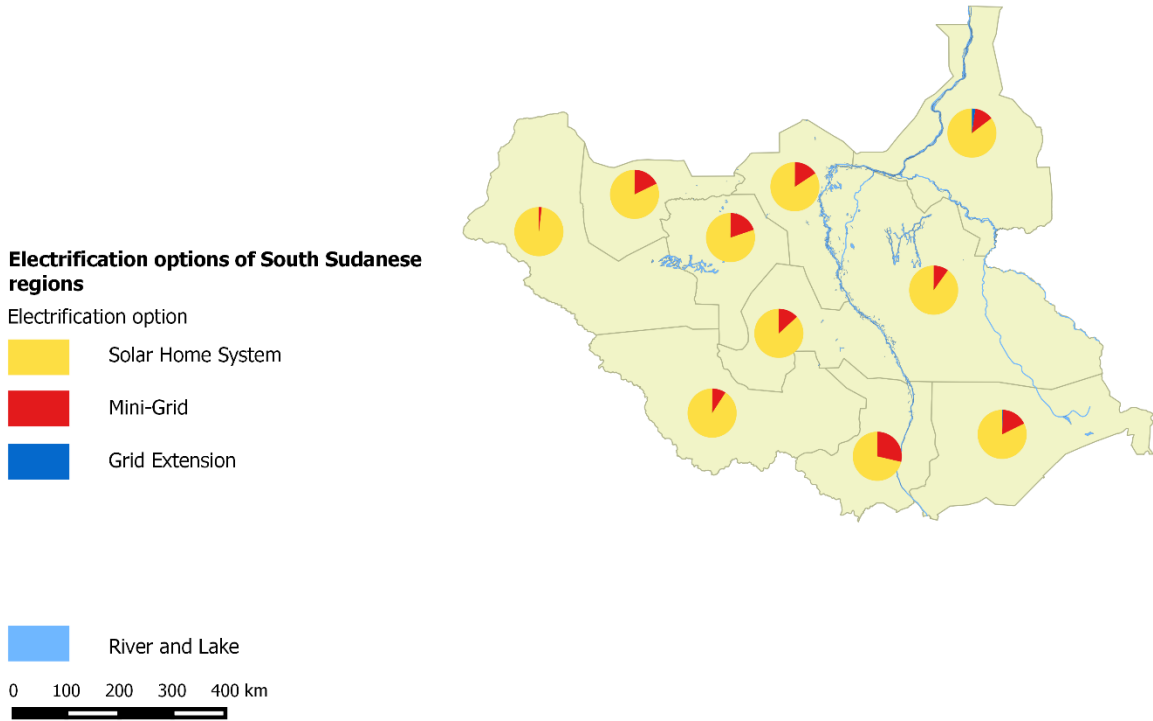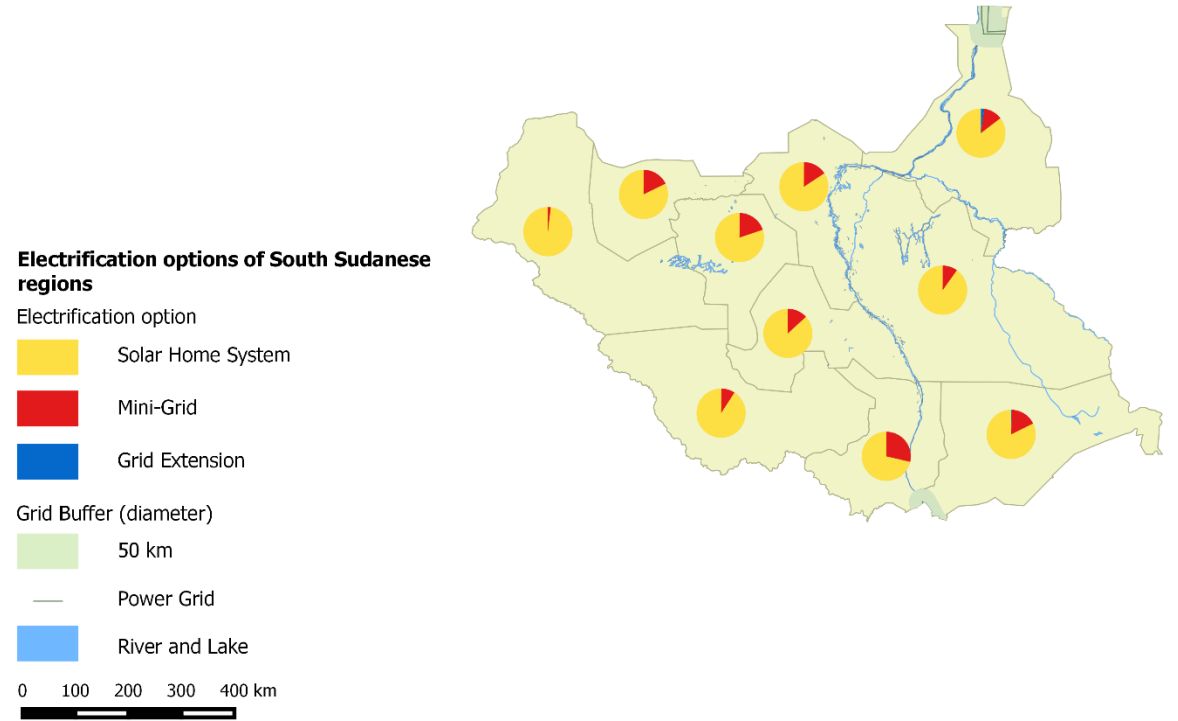

# Electrification option: GridBuilt-SHSDom

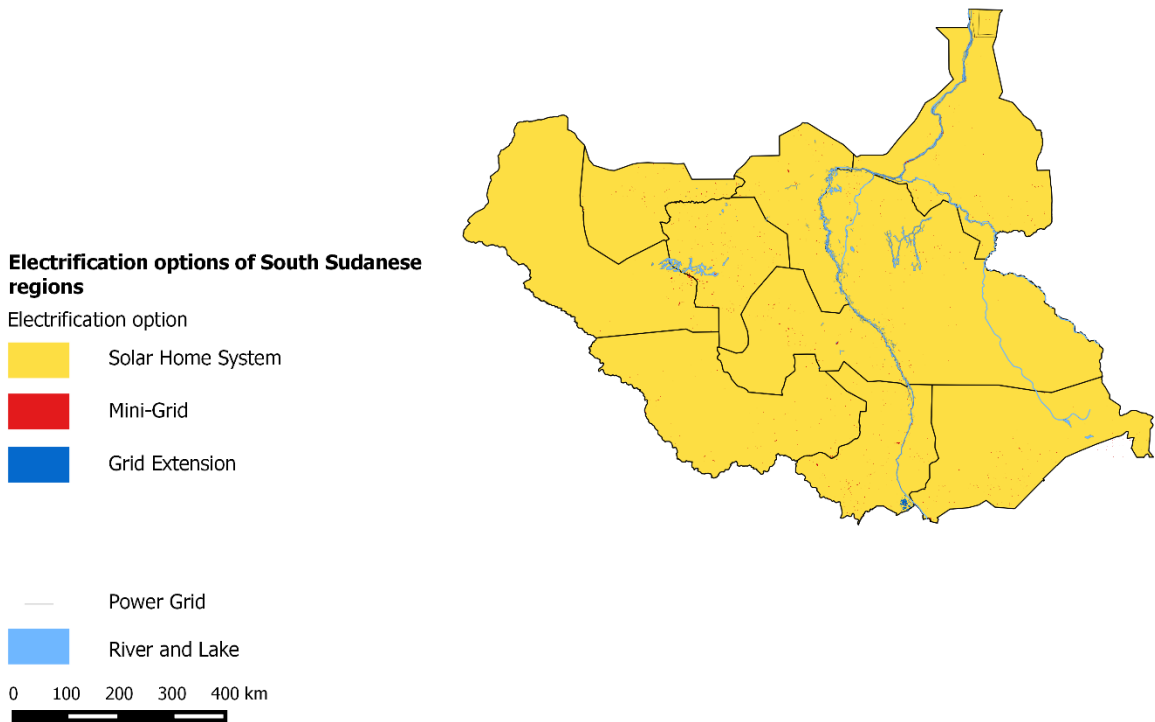

# Electrification option: GridBuilt-GridDom

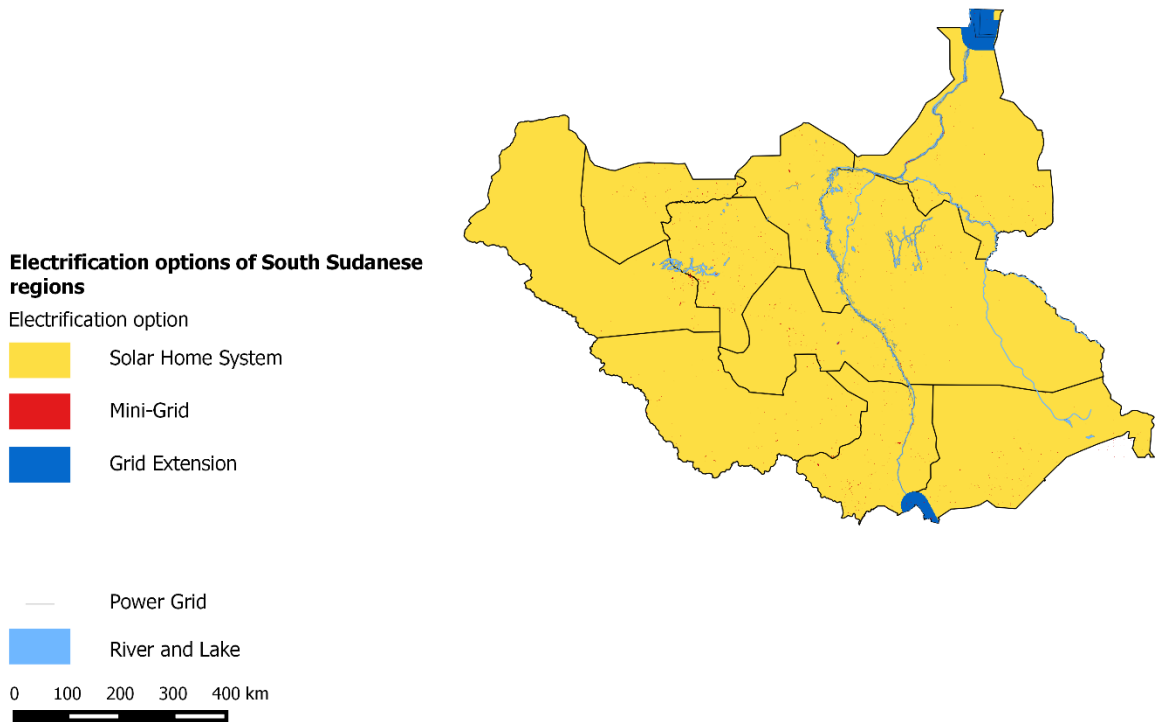

Share of electrification options in all South Sudanese regions

SHS (%) Mini-Grid (%) Grid (%)

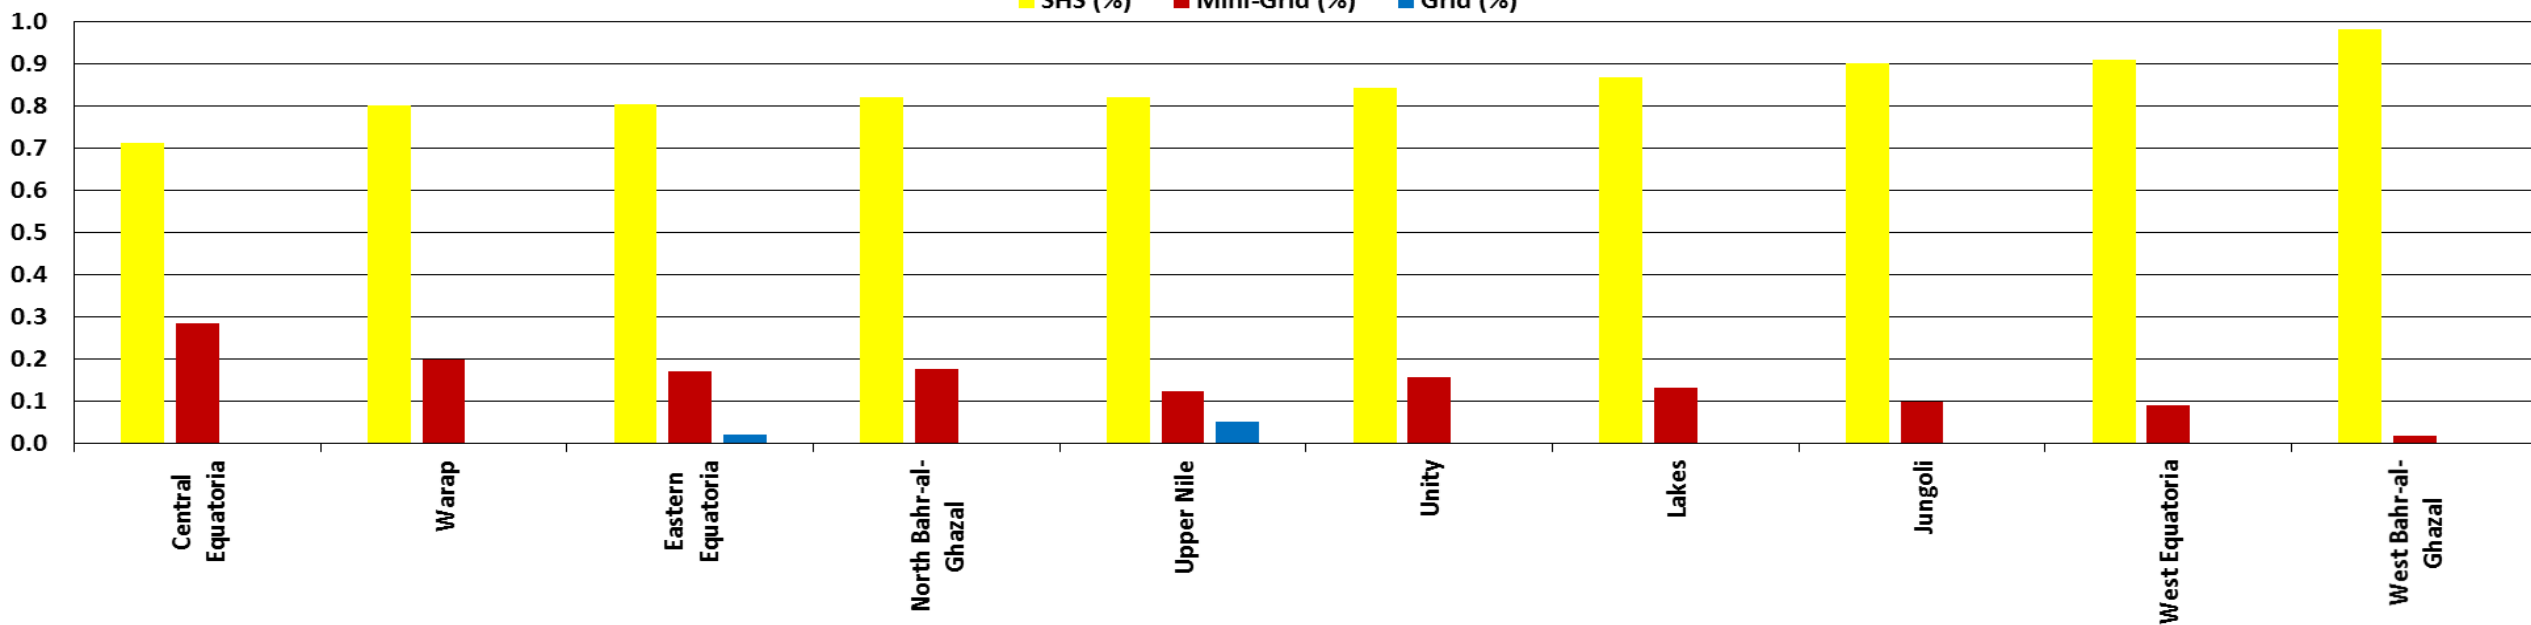

Share of electrification options in all South Sudanese regions

SHS (%) Mini-Grid (%) Grid (%)

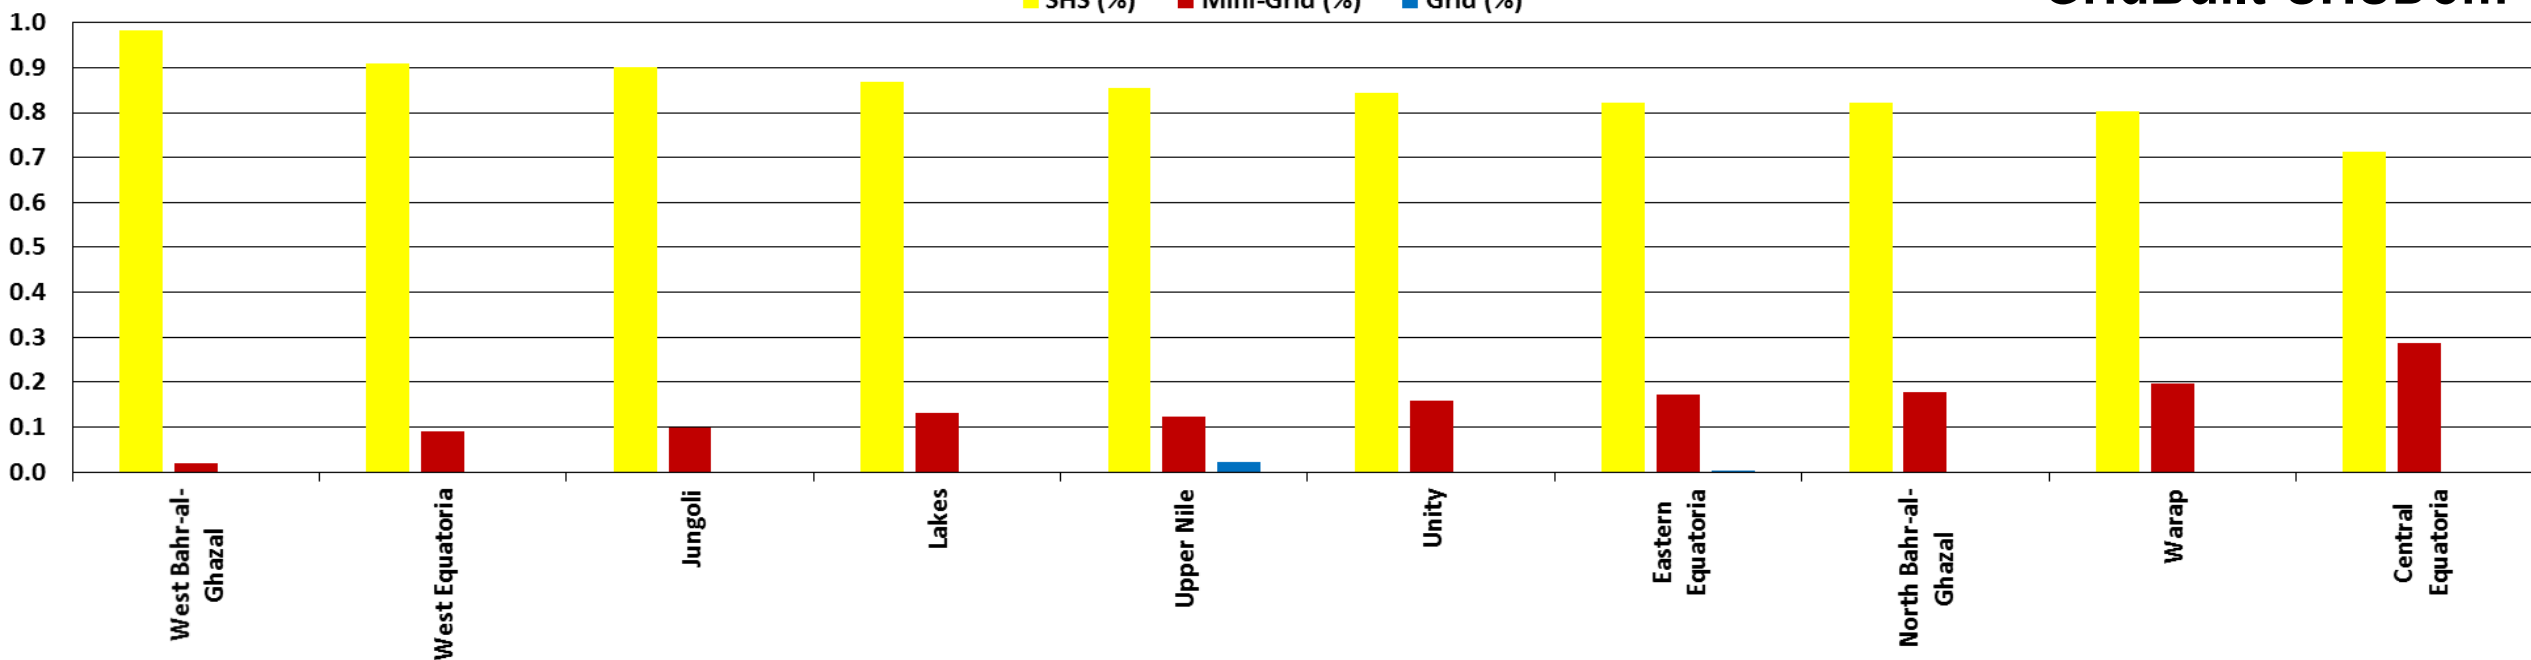

# Electrification option in all South Sudanese regions: GridPlanned-GridDom

## Electrification options of South Sudanese regions

Electrification option

- Solar Home System
- Mini-Grid
- Grid Extension

River and Lake

0 100 200 300 400 km

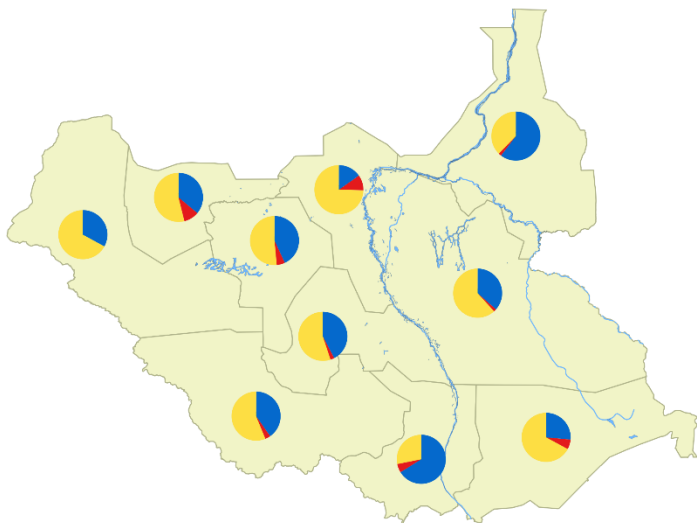

## Electrification options of South Sudanese regions

Electrification option

- Solar Home System
- Mini-Grid
- Grid Extension

Grid Buffer (diameter)

- 50 km
- Power Grid
- River and Lake

0 100 200 300 400 km

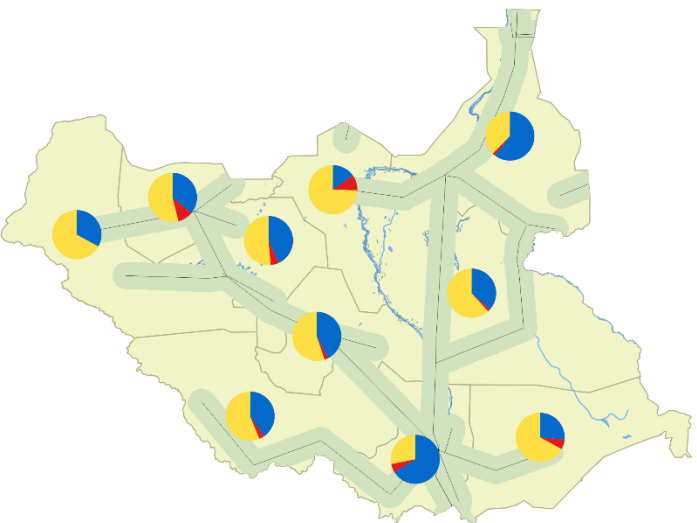

# Electrification option in all South Sudanese regions: GridPlanned-SHSDom

## Electrification options of South Sudanese regions

Electrification option

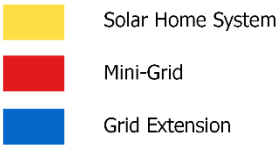

River and Lake

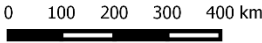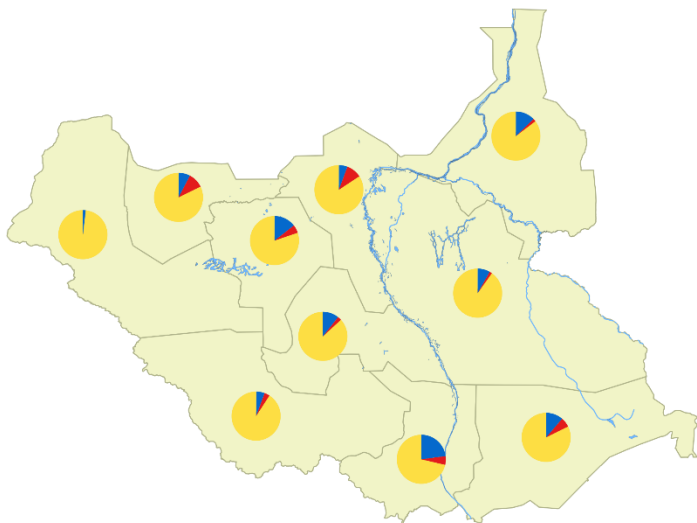

## Electrification options of South Sudanese regions

Electrification option

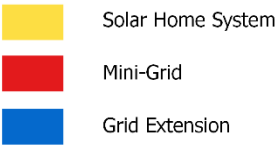

Grid Buffer (diameter)

50 km

Power Grid

River and Lake

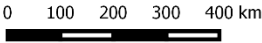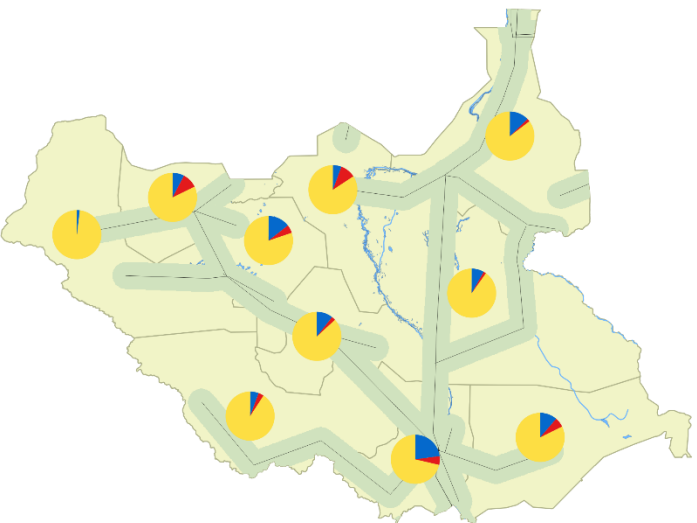

# Electrification option: GridPlanned-SHSDom

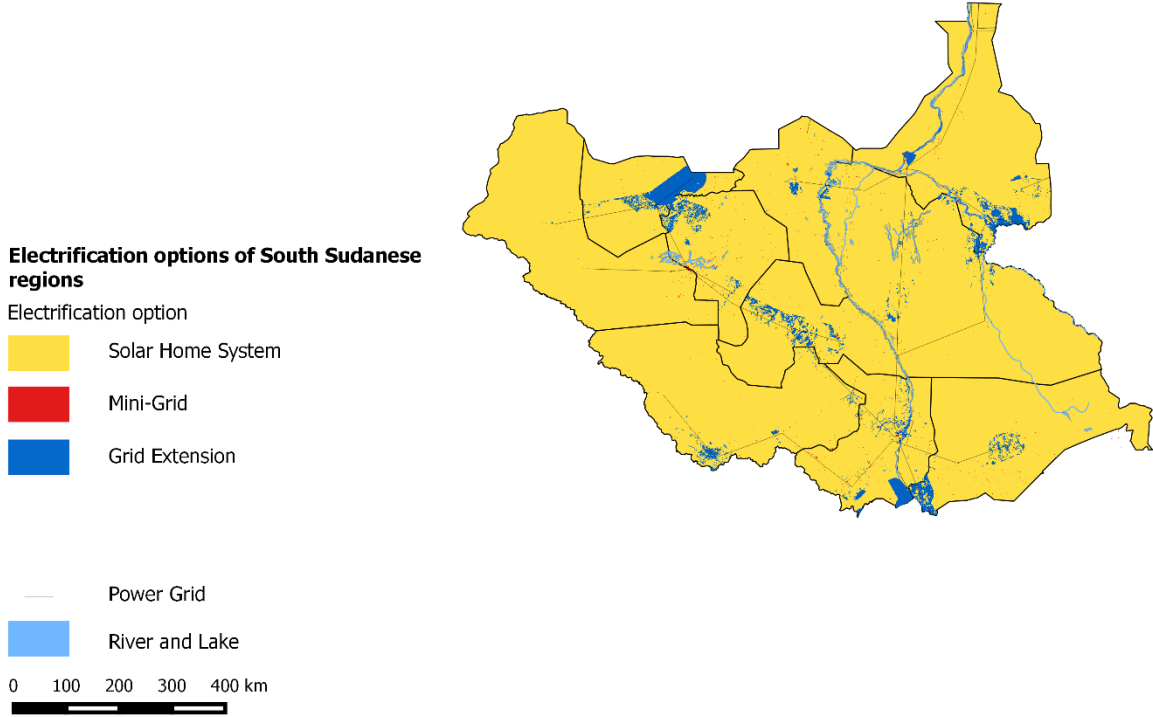

# Electrification option: GridPlanned-GridDom

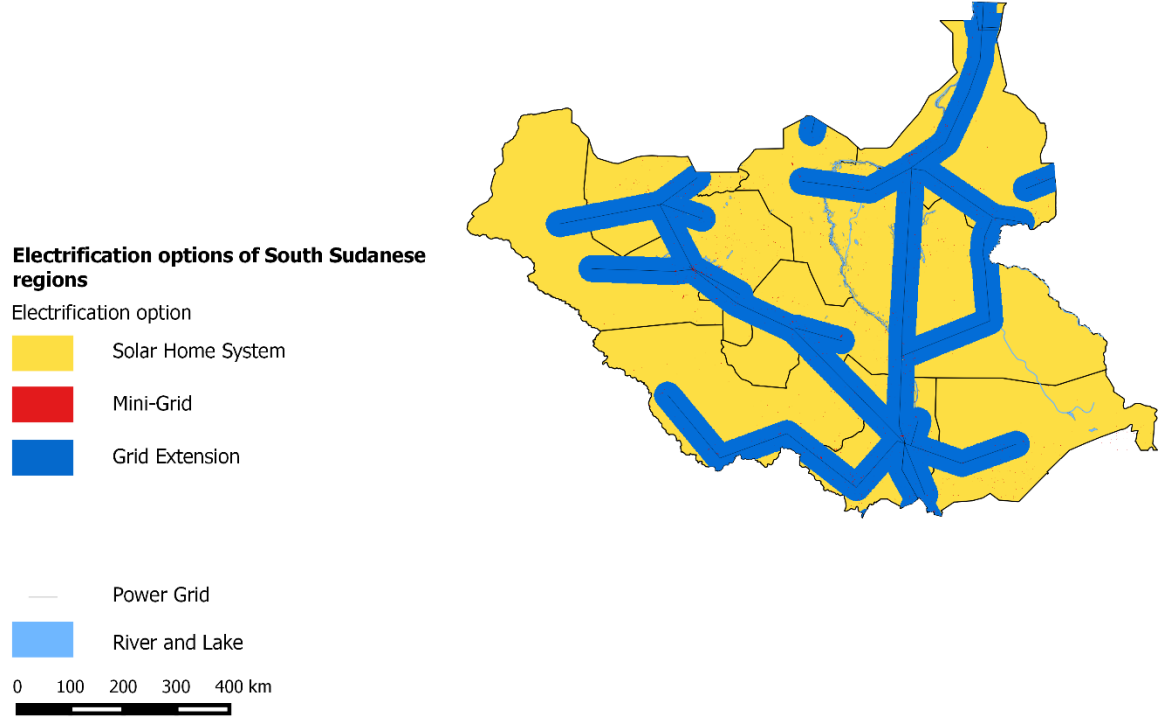

Share of electrification options in all South Sudanese regions

SHS (%) Mini-Grid (%) Grid (%)

GridPlanned-GridDom

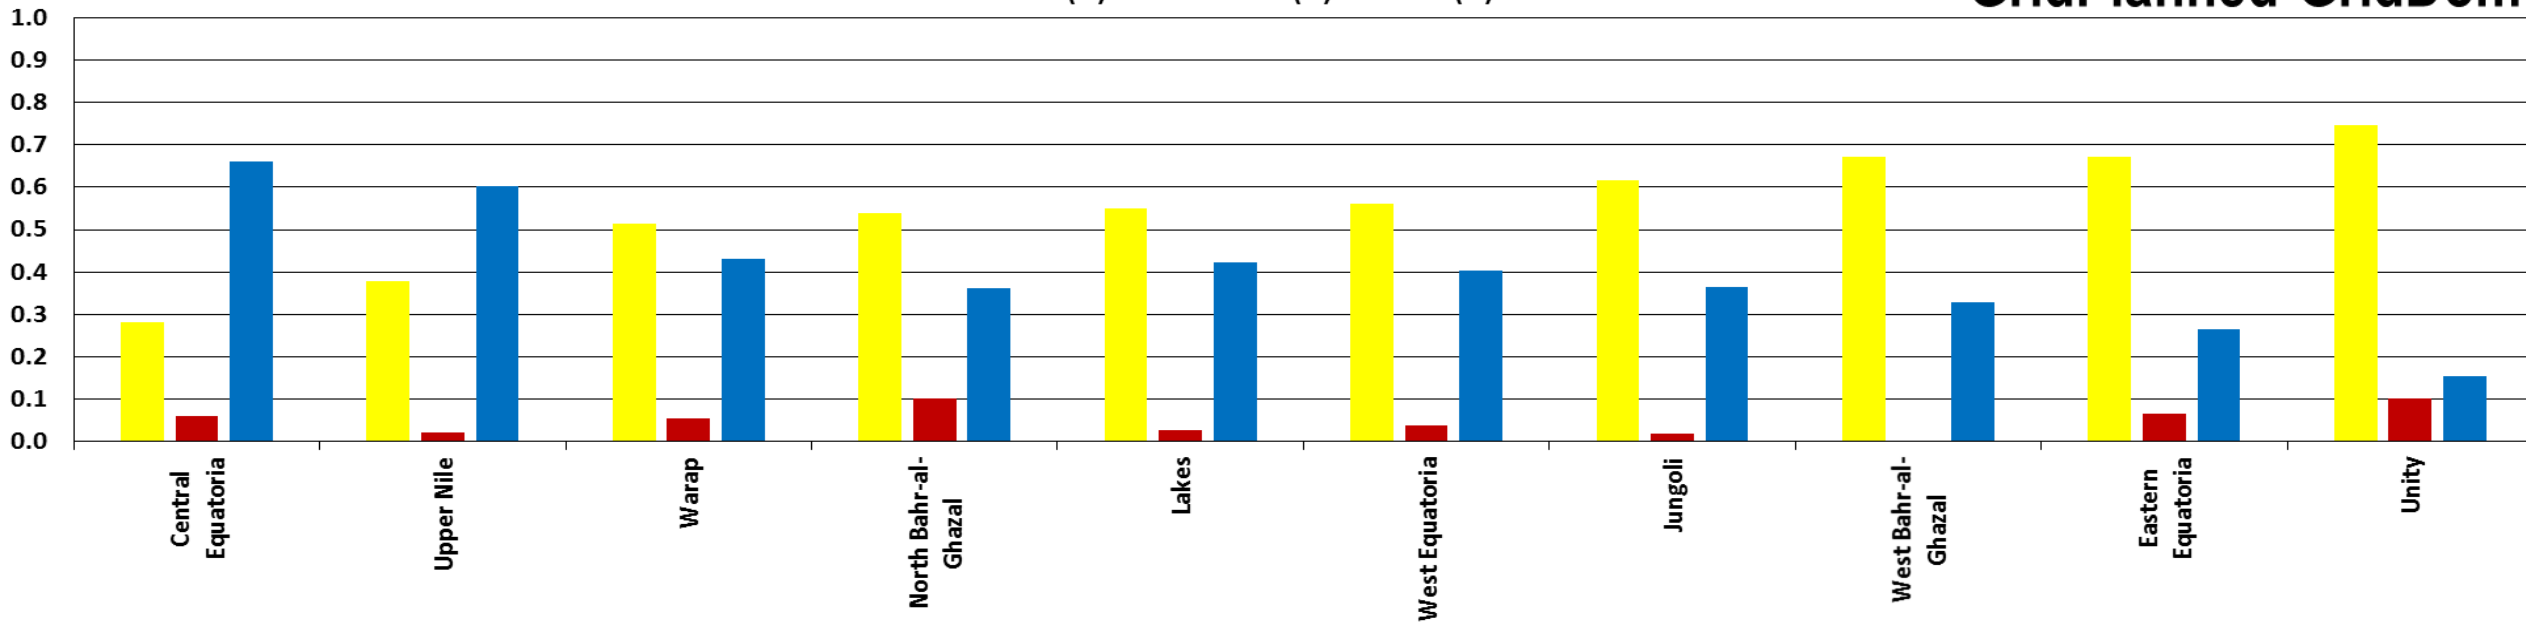

Share of electrification options in all South Sudanese regions

SHS (%) Mini-Grid (%) Grid (%)

GridPlanned-SHSDom

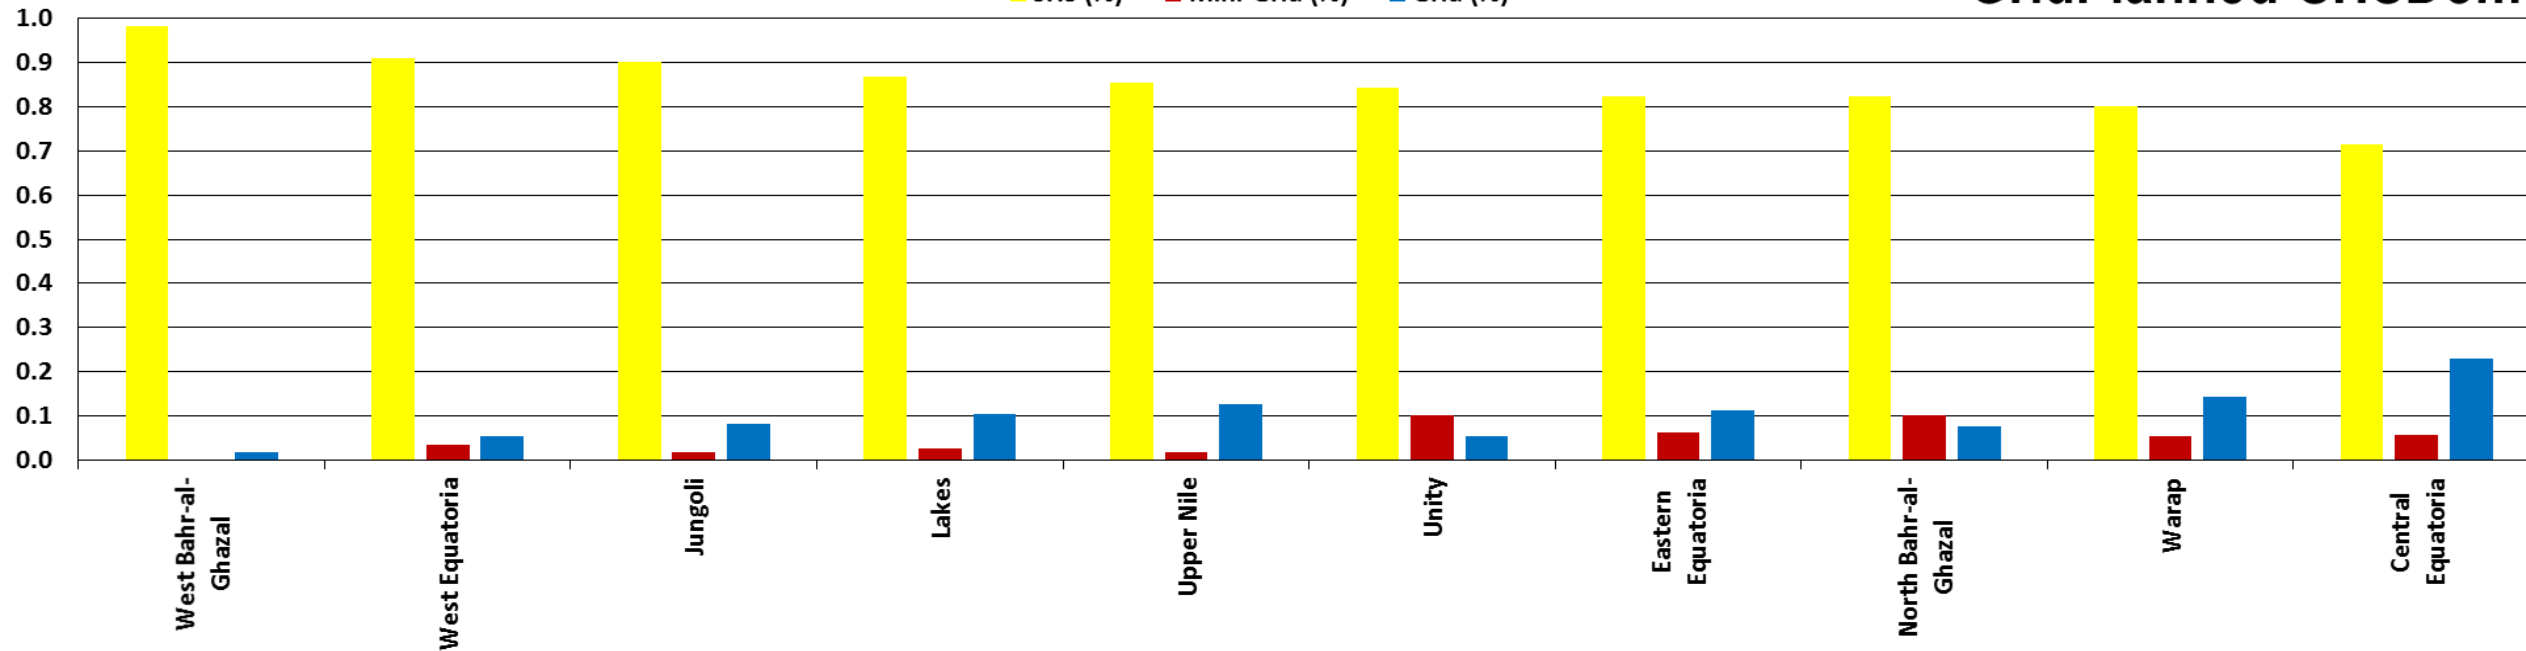

# Sudan

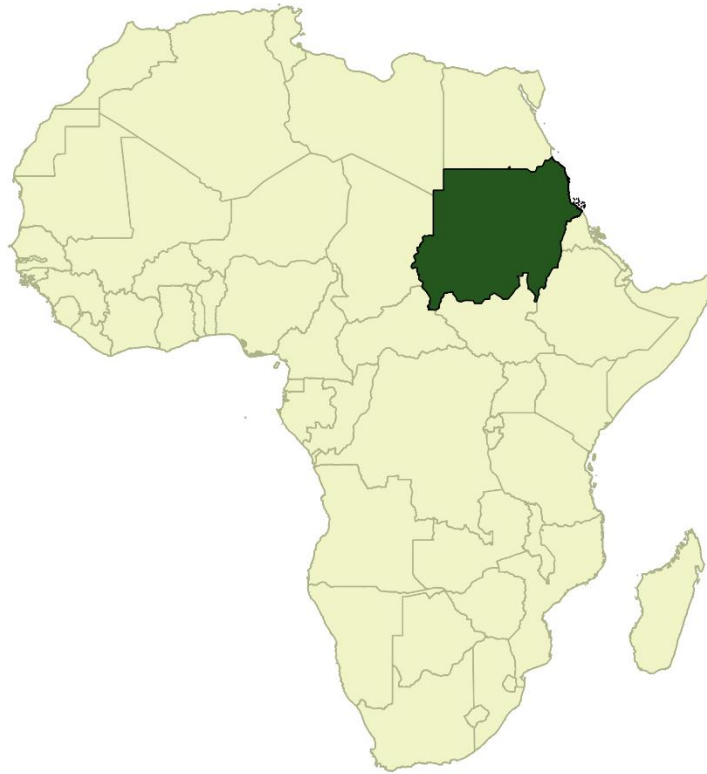

# Night light emission and Population of Sudanese regions

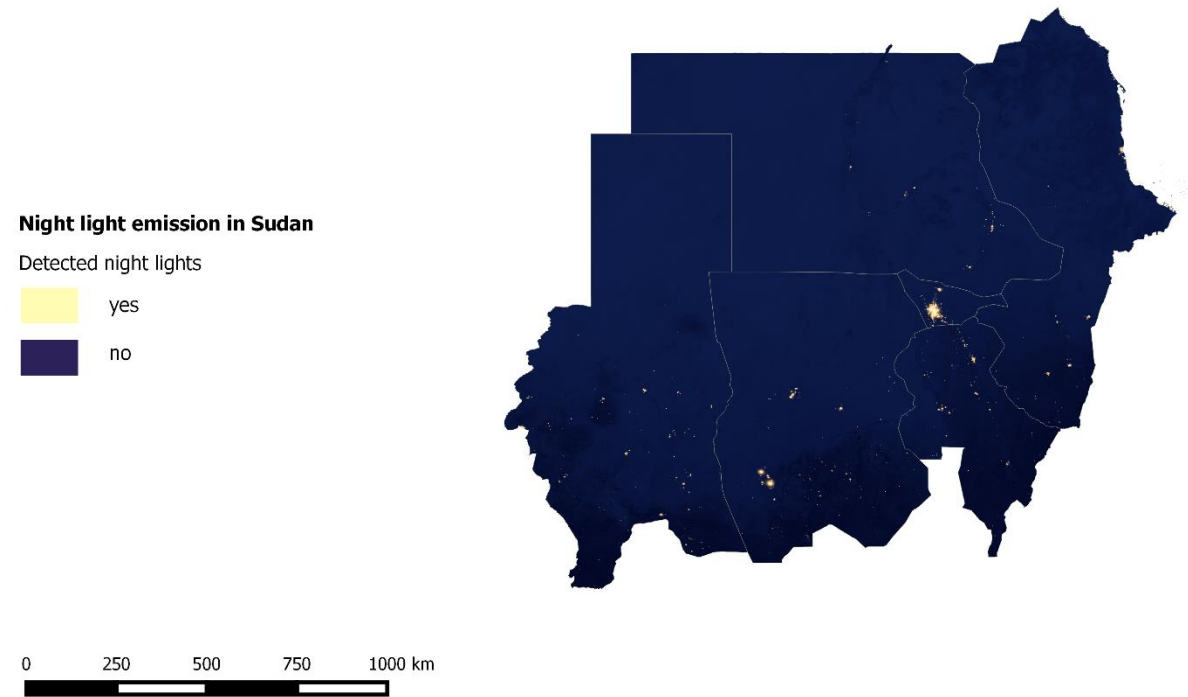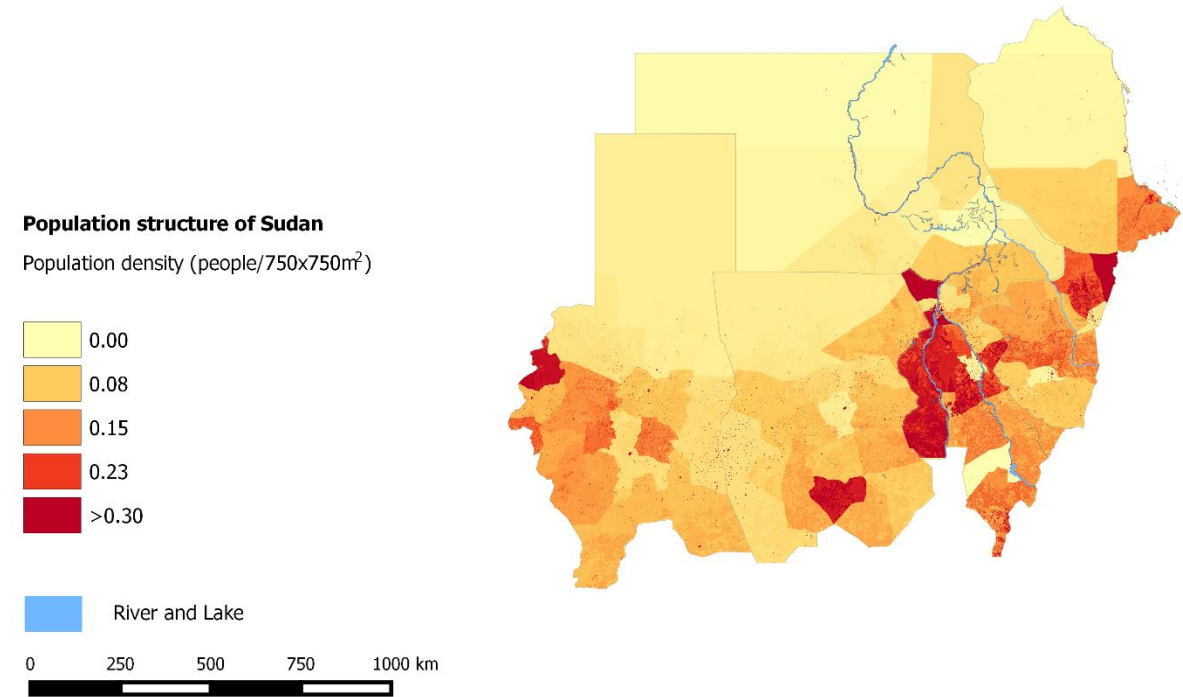

# Electrification option in all Sudanese regions: GridBuilt-GridDom

## Electrification options of Sudanese regions

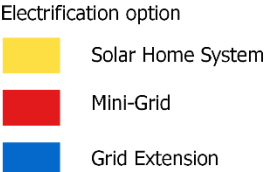

River and Lake

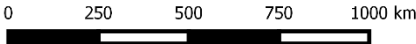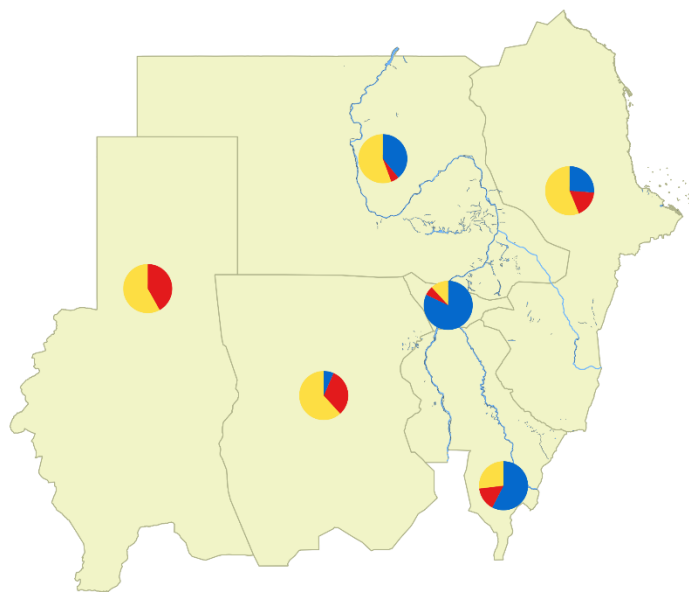

## Electrification options of Sudanese regions

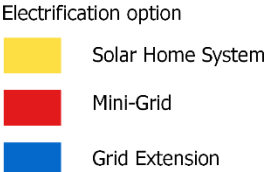

Grid Buffer (diameter)

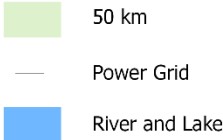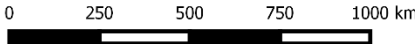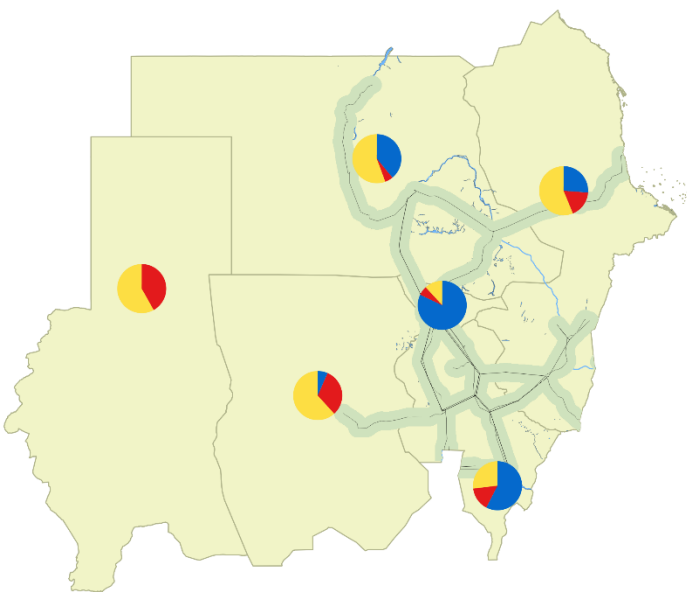

# Electrification option in all Sudanese regions: GridBuilt-SHSDom

## Electrification options of Sudanese regions



River and Lake

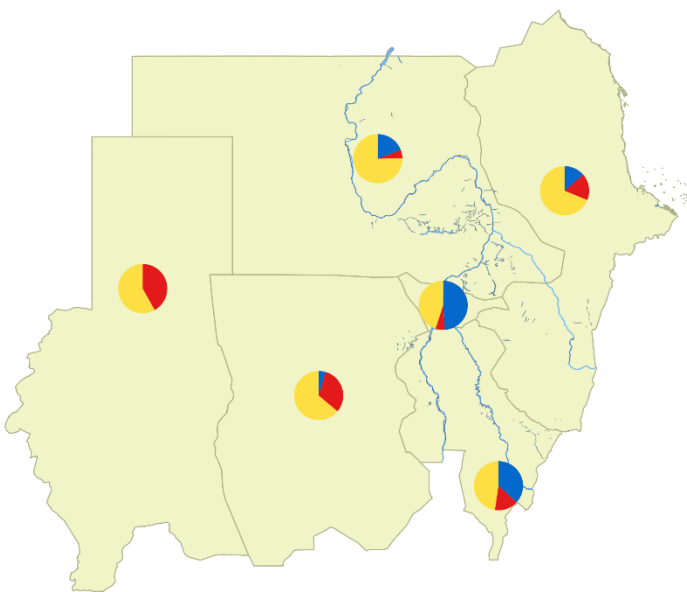

## Electrification options of Sudanese regions



Grid Buffer (diameter)

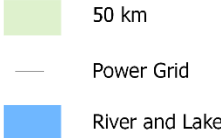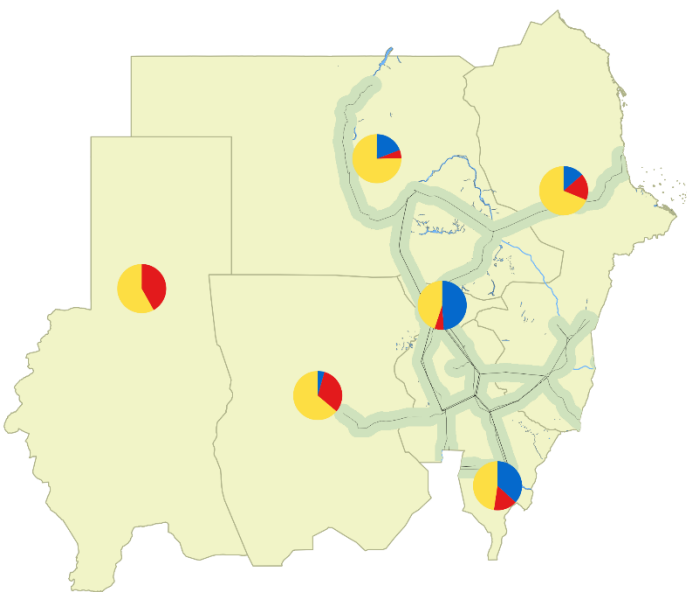

# Electrification option: GridBuilt-SHSDom

Electrification options of Sudanese regions

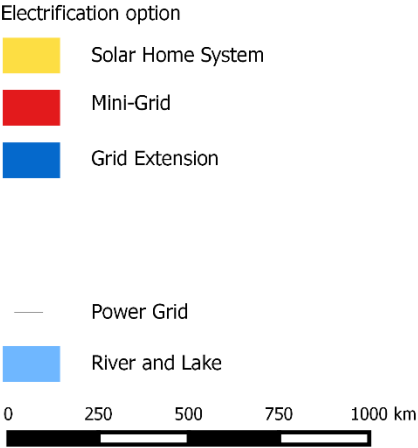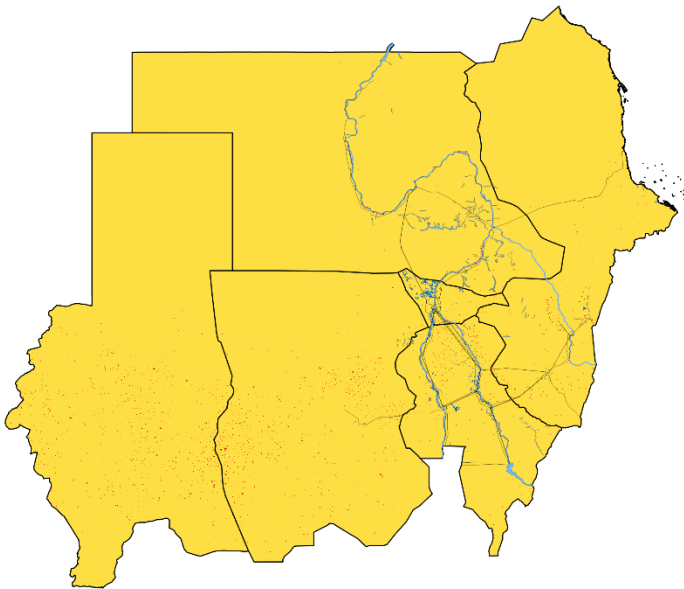

# Electrification option: GridBuilt-GridDom

Electrification options of Sudanese regions

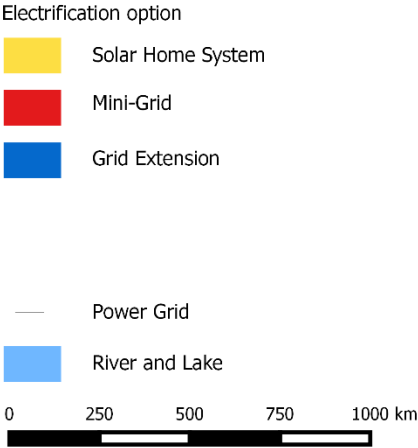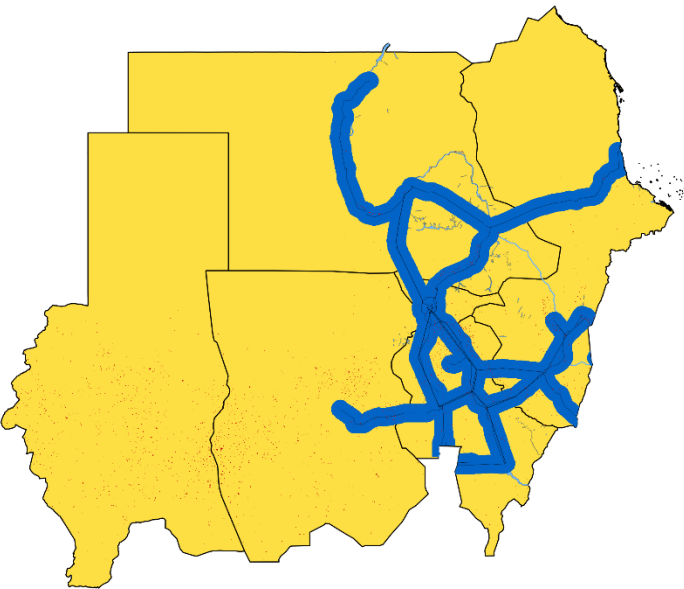

Share of electrification options in all Sudanese regions

SHS (%) Mini-Grid (%) Grid (%)

GridBuilt-GridDom

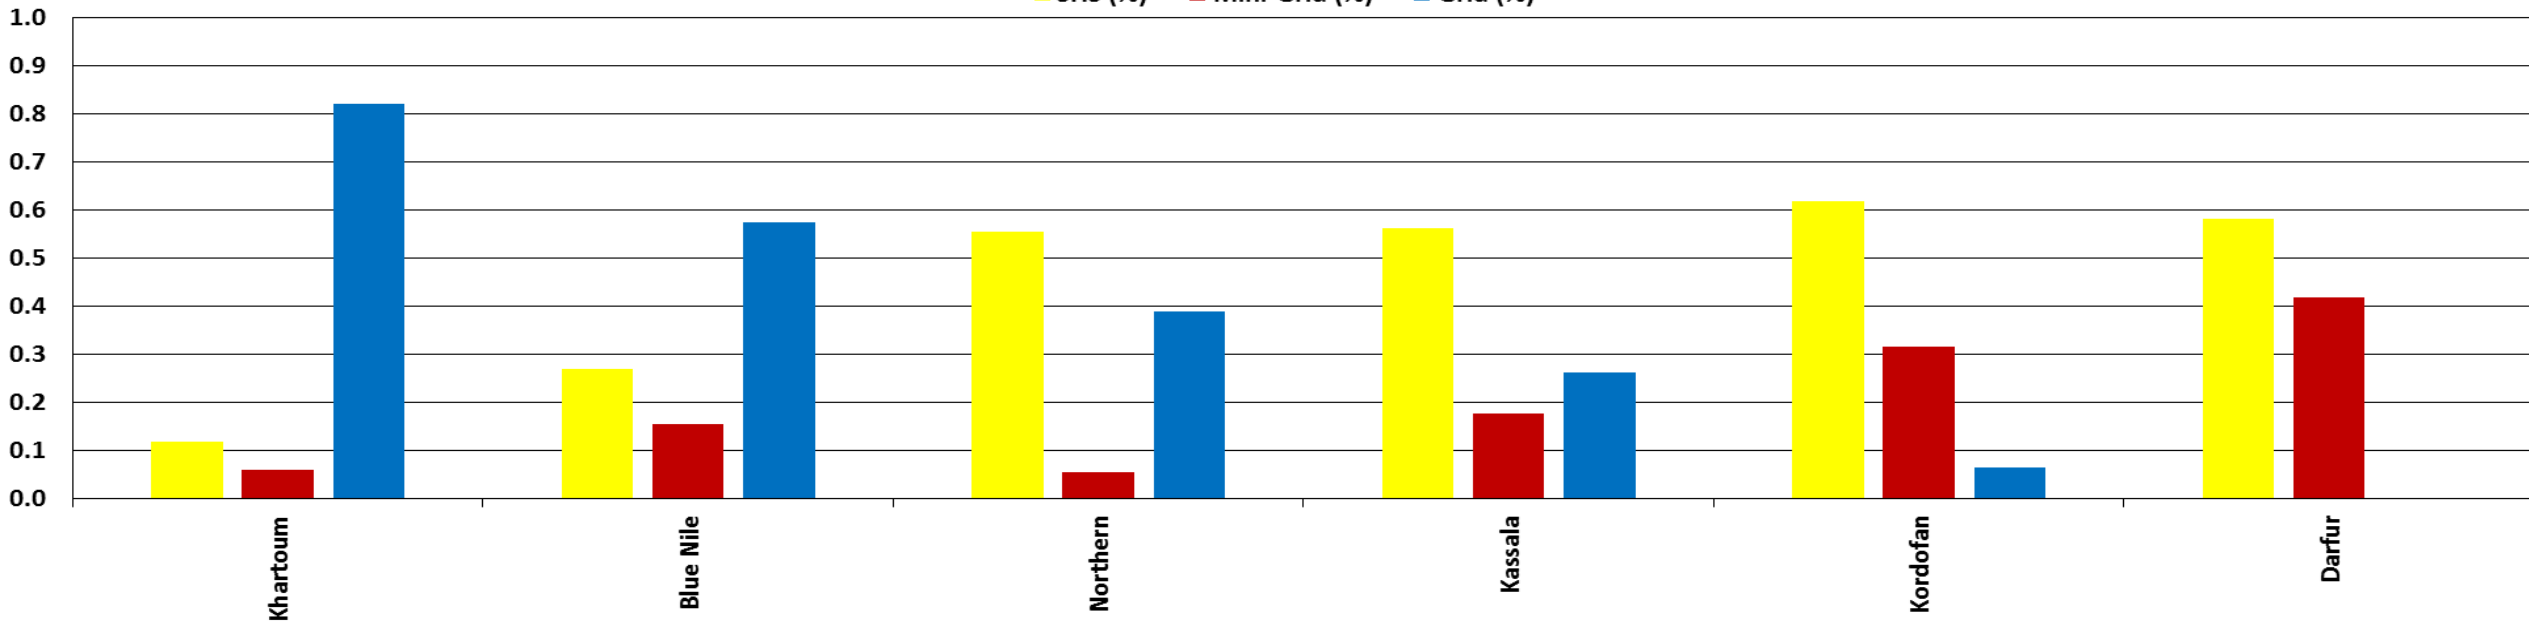

Share of electrification options in all Sudanese regions

SHS (%) Mini-Grid (%) Grid (%)

GridBuilt-SHSDom

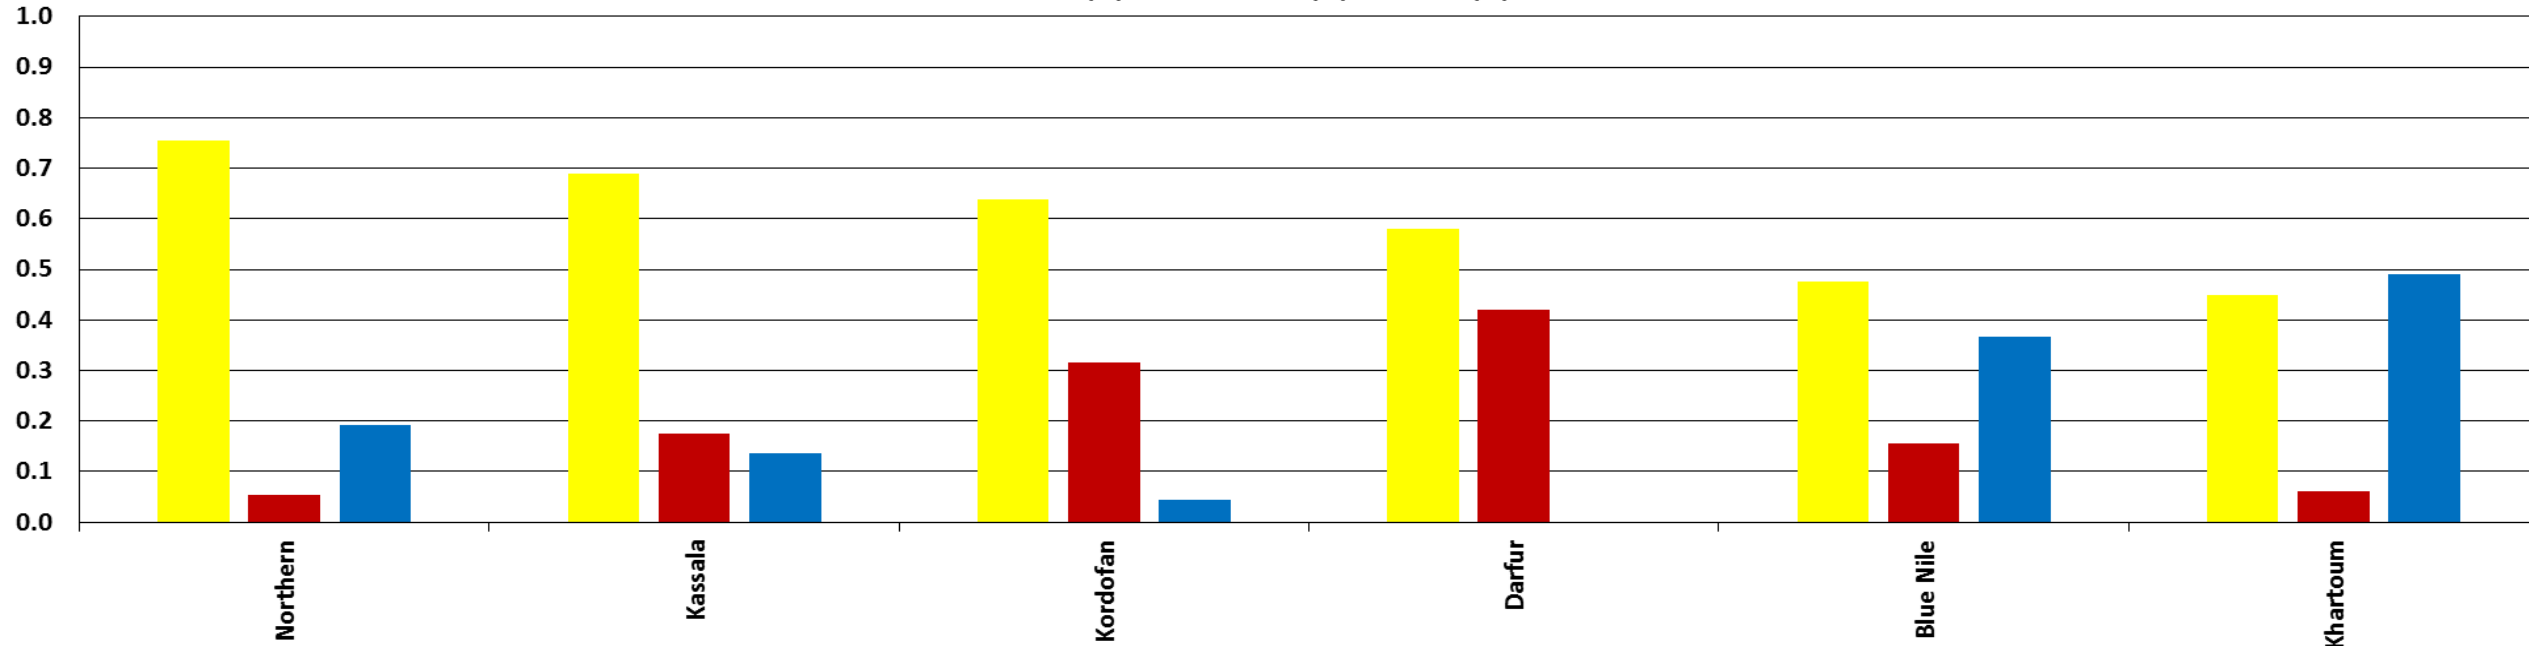

# Electrification option in all Sudanese regions: GridPlanned-GridDom

## Electrification options of Sudanese regions

Electrification option

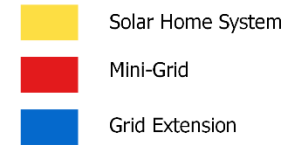

River and Lake

0 250 500 750 1000 km

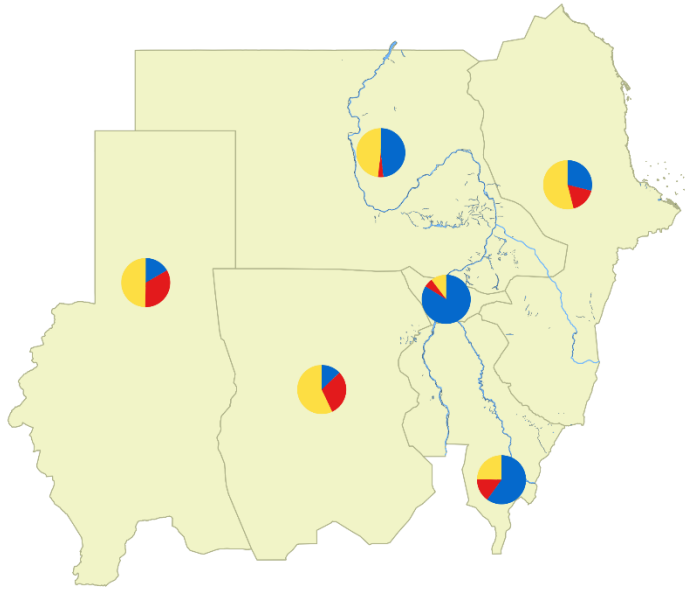

## Electrification options of Sudanese regions

Electrification option

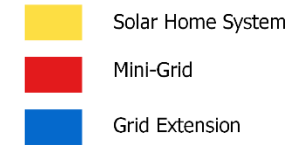

Grid Buffer (diameter)

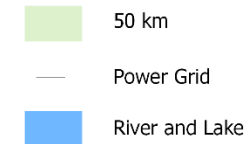

0 250 500 750 1000 km

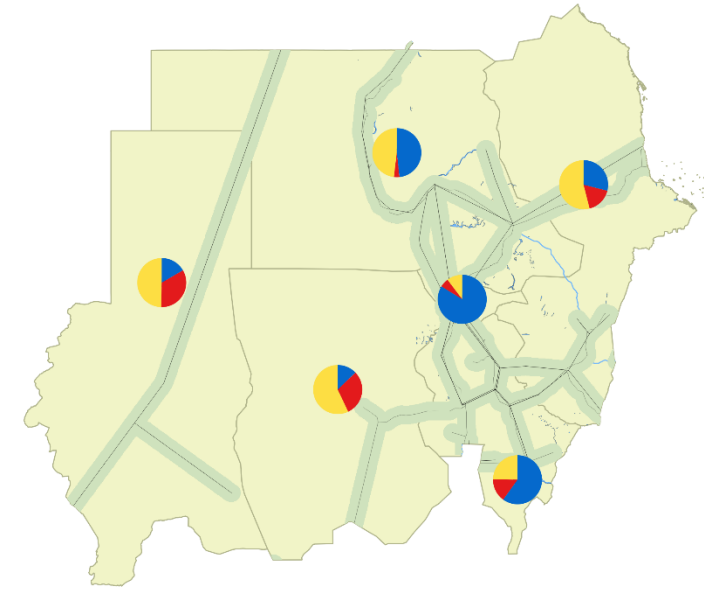

# Electrification option in all Sudanese regions: GridPlanned-SHSDom

## Electrification options of Sudanese regions

Electrification option

-  Solar Home System
-  Mini-Grid
-  Grid Extension

 River and Lake

0 250 500 750 1000 km

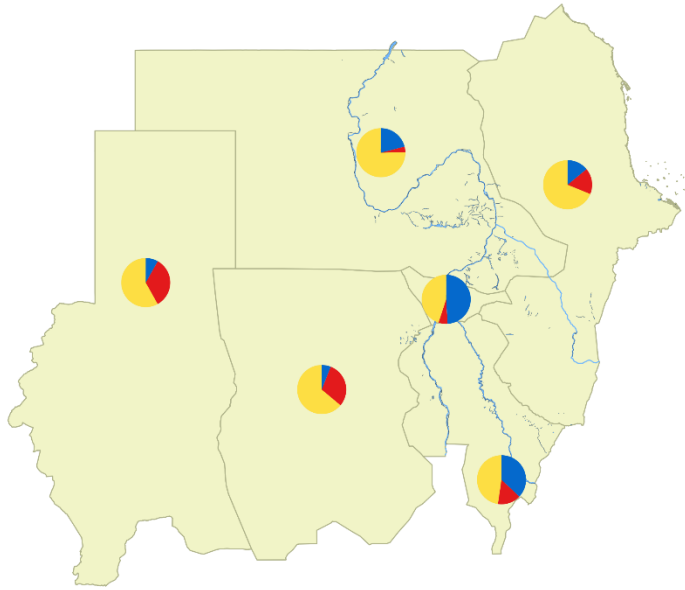

## Electrification options of Sudanese regions

Electrification option

-  Solar Home System
-  Mini-Grid
-  Grid Extension

Grid Buffer (diameter)

-  50 km
-  Power Grid
-  River and Lake

0 250 500 750 1000 km

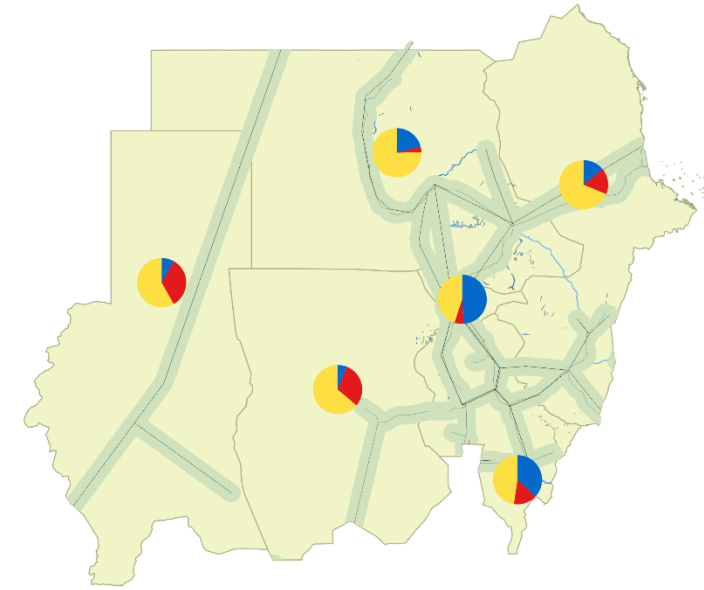

# Electrification option: GridPlanned-SHSDom

# Electrification option: GridPlanned-GridDom

Electrification options of Sudanese regions

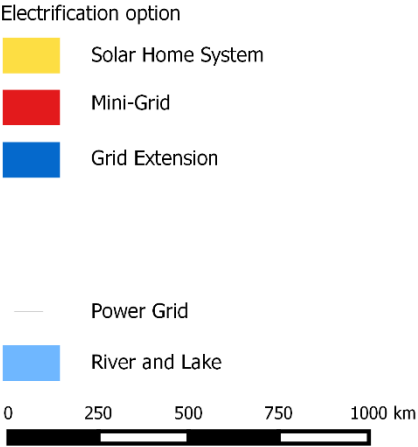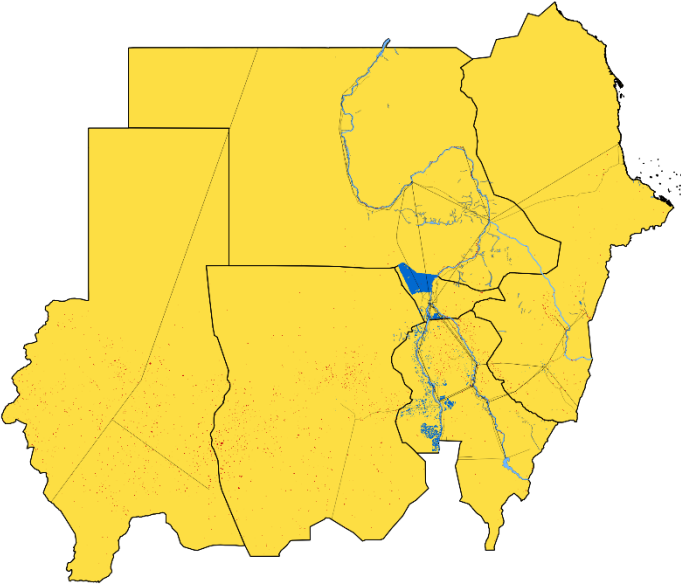

Electrification options of Sudanese regions

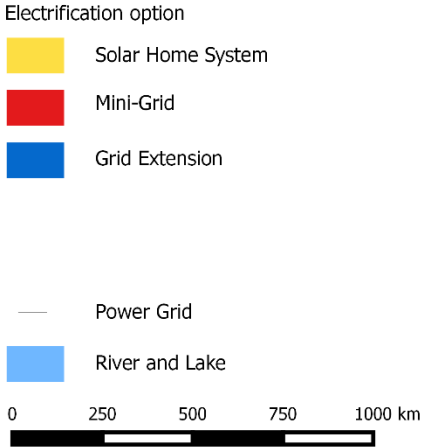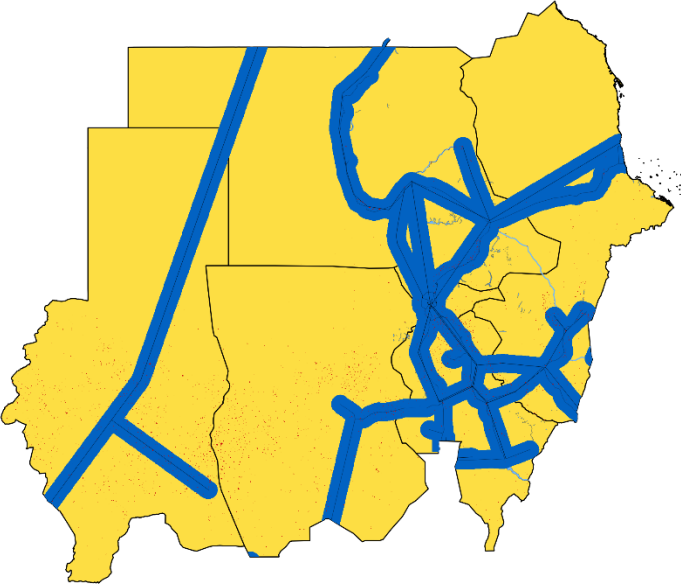

Share of electrification options in all Sudanese regions

SHS (%) Mini-Grid (%) Grid (%)

GridPlanned-GridDom

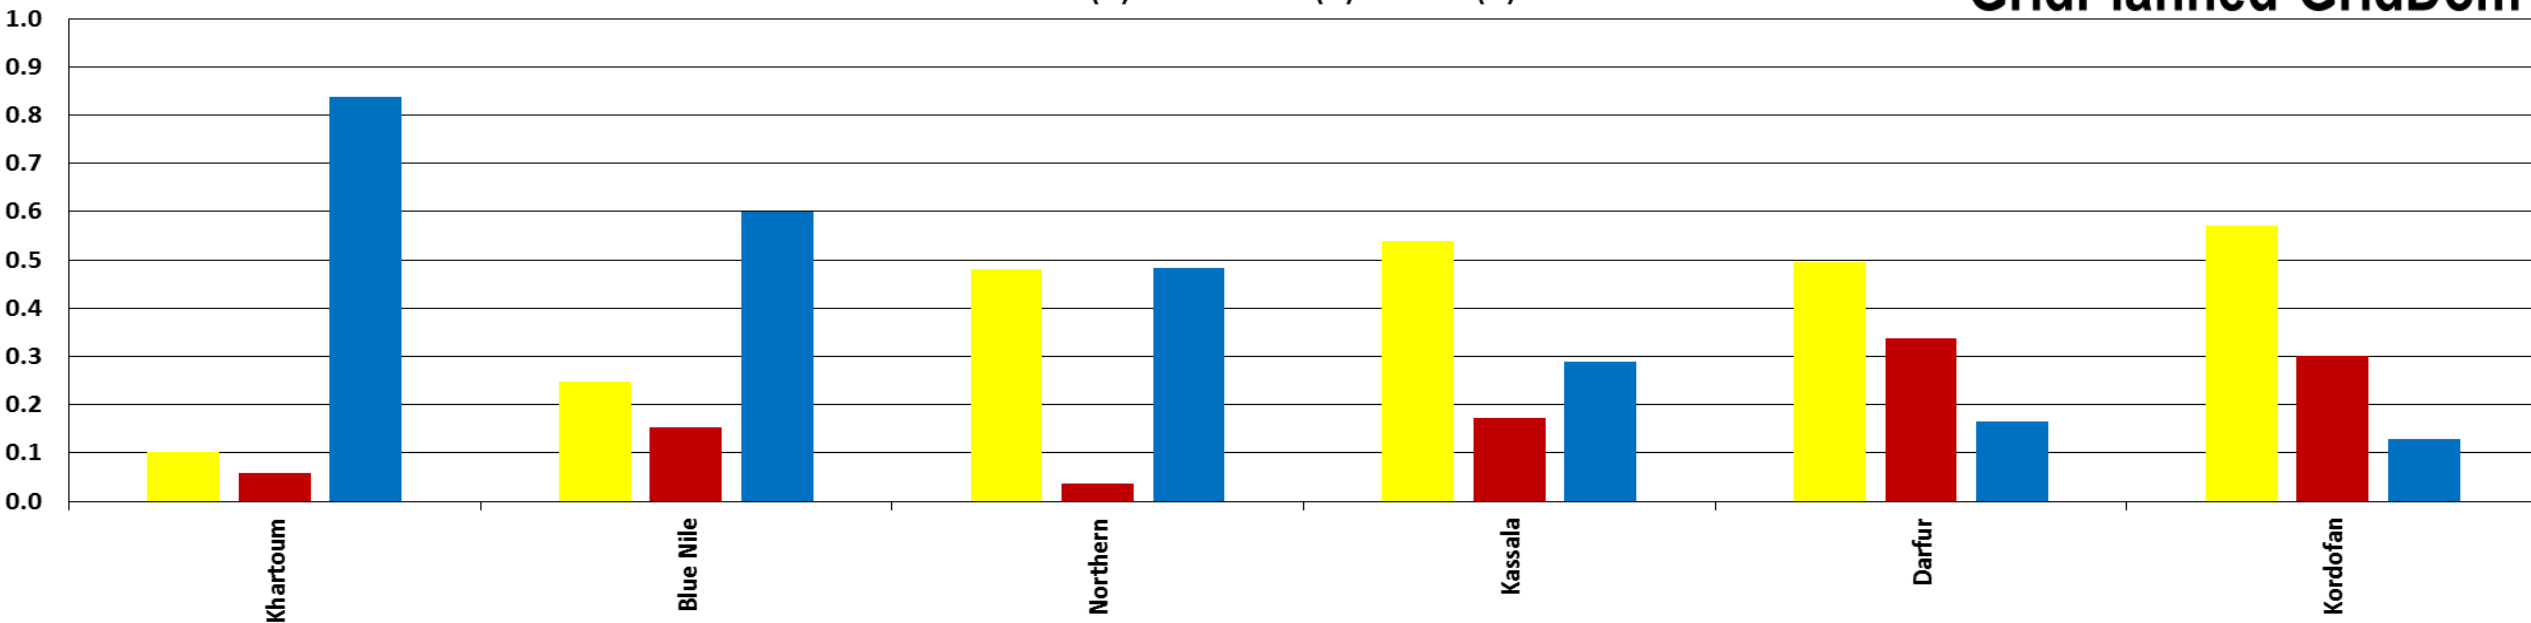

Share of electrification options in all Sudanese regions

SHS (%) Mini-Grid (%) Grid (%)

GridPlanned-SHSDom

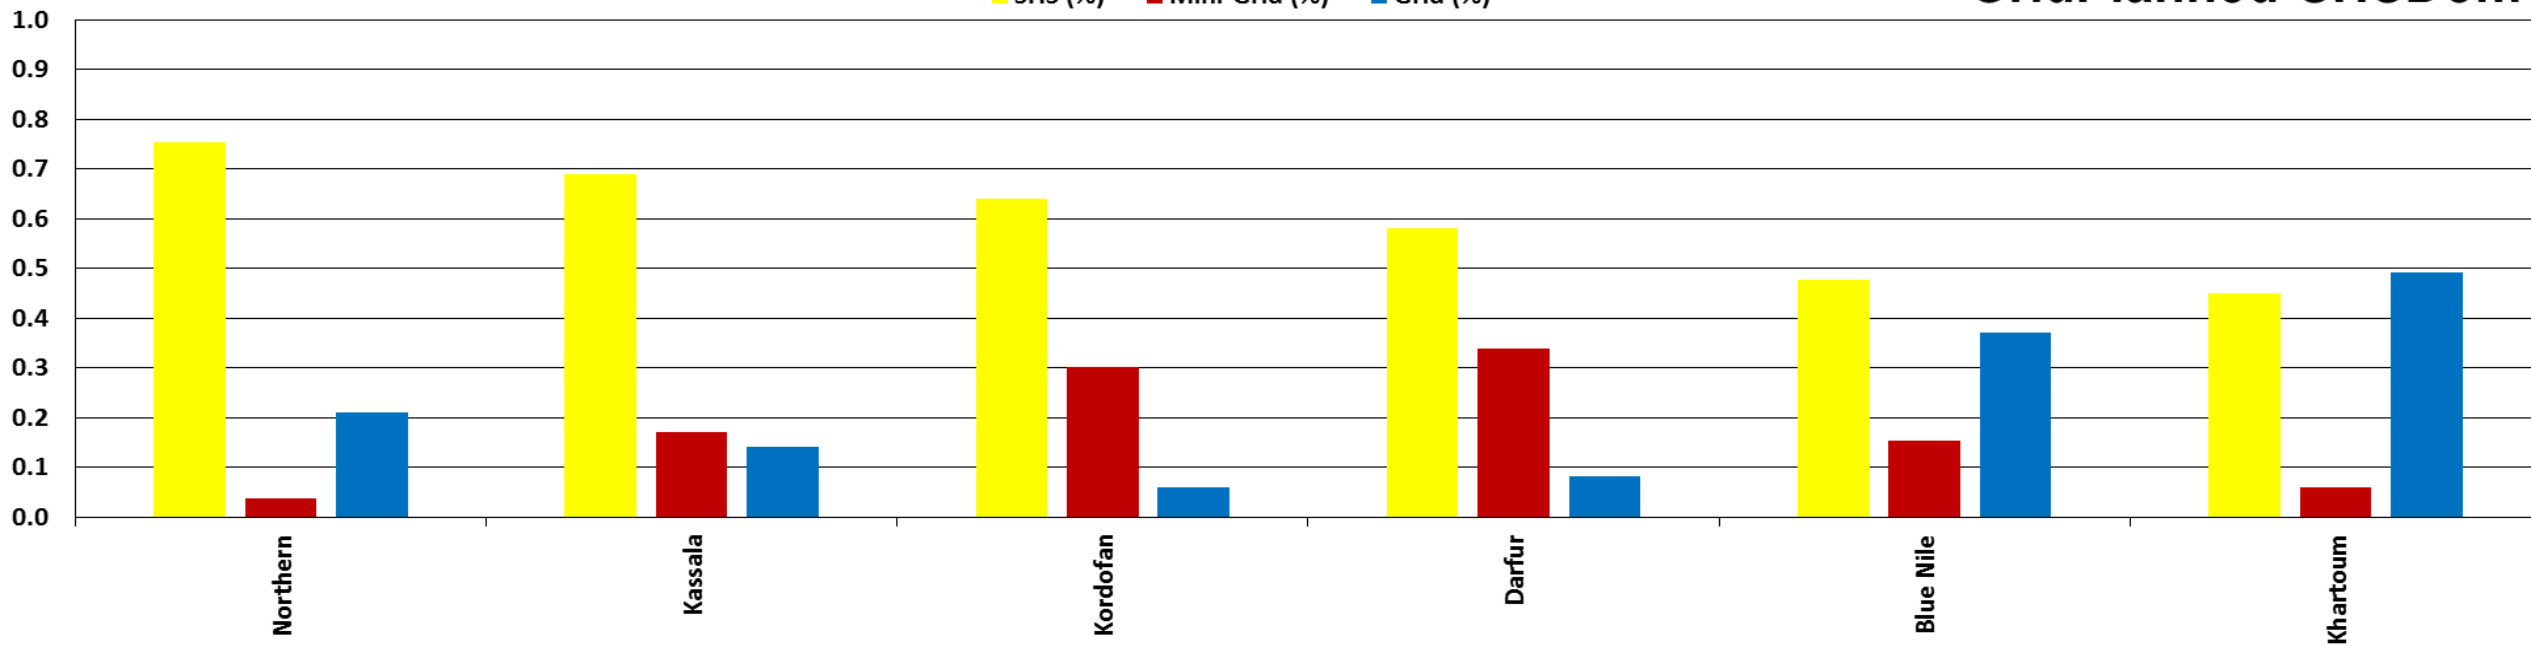

# Tanzania

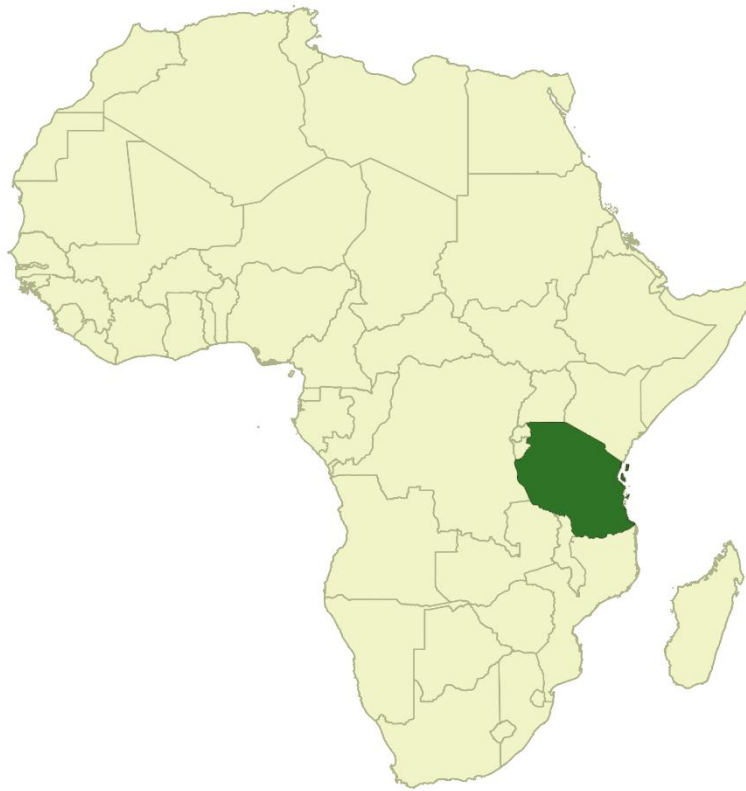

# Night light emission and Population of Tanzanian regions

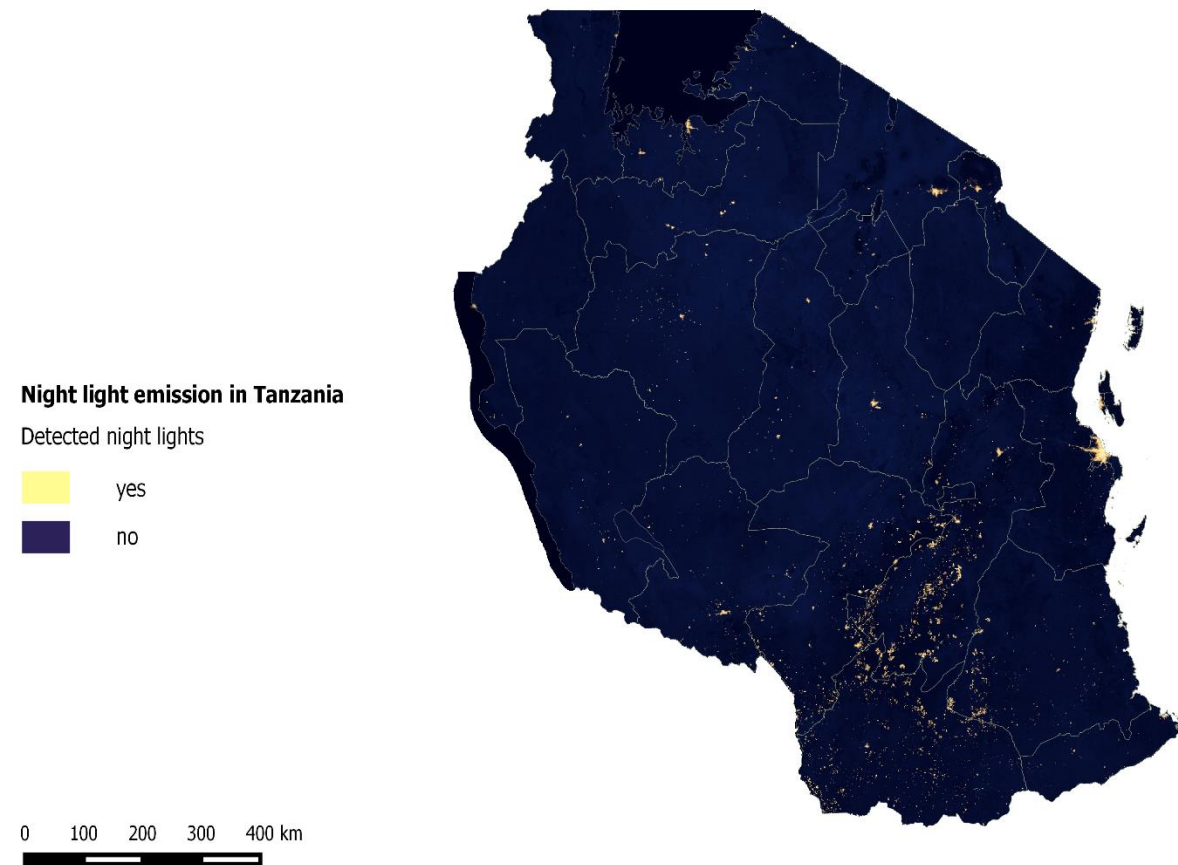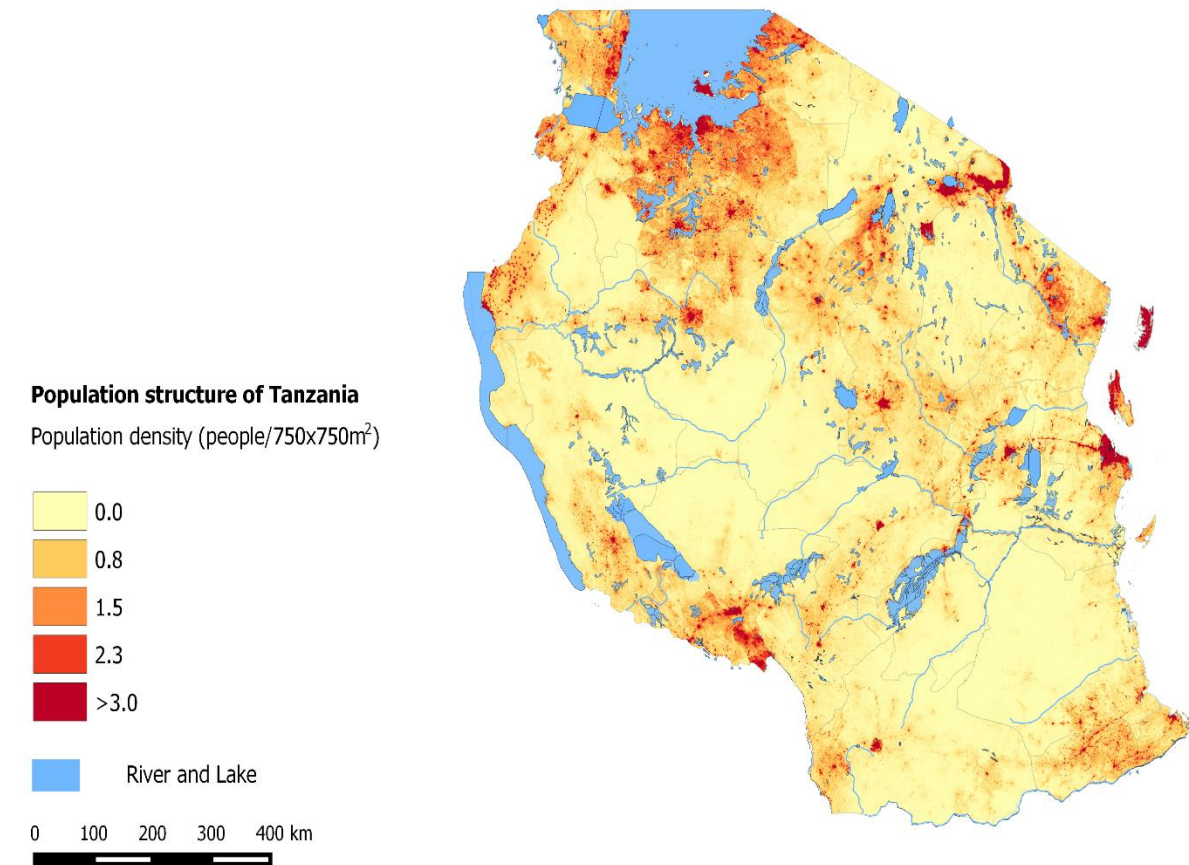

# Electricfrication option in all Tanzanian regions: GridBuilt-SHSDom

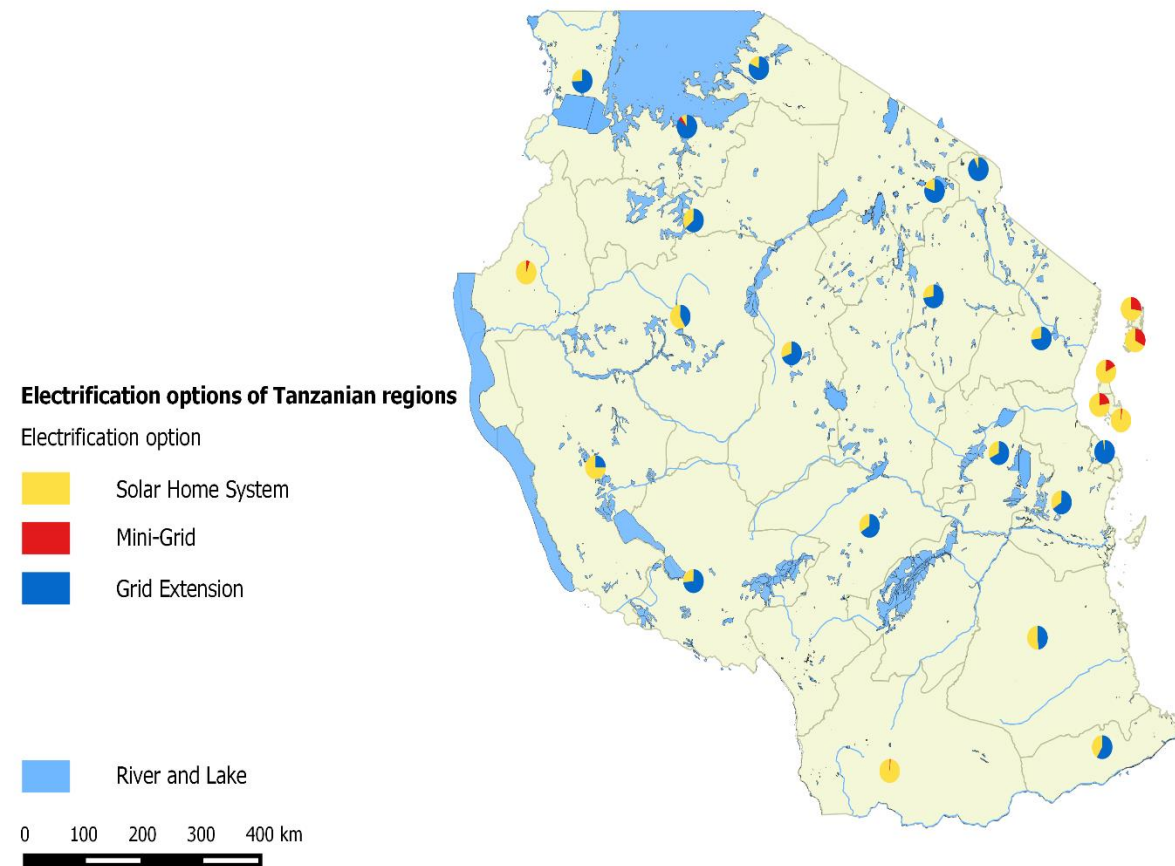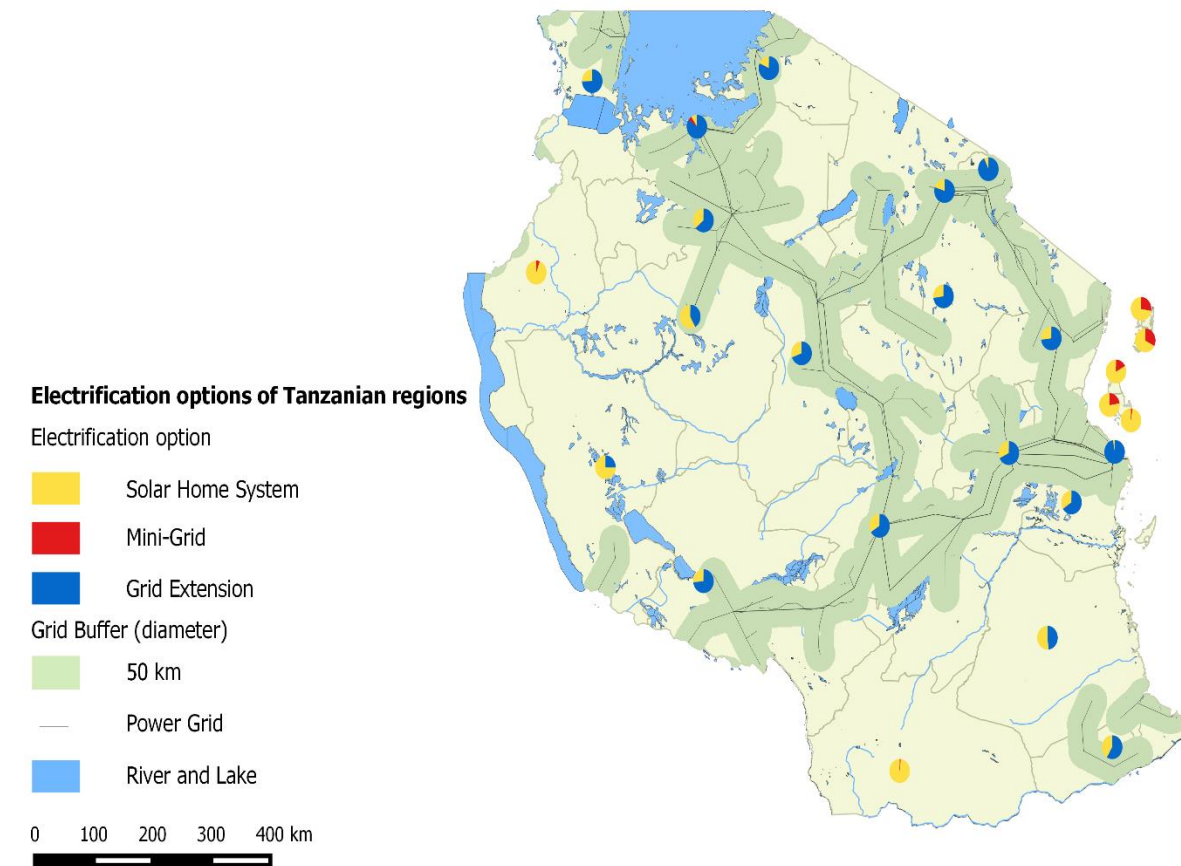

# Electricfrication option in all Tanzanian regions: GridBuilt-GridDom

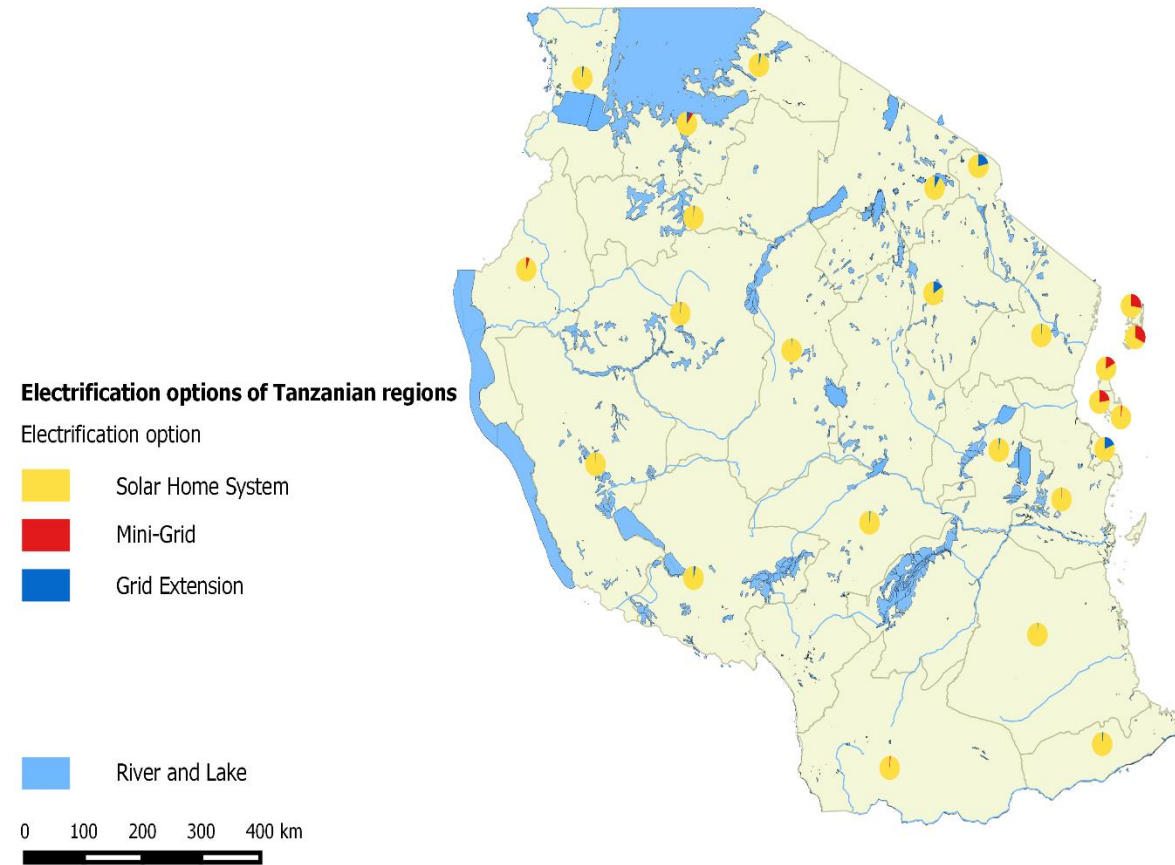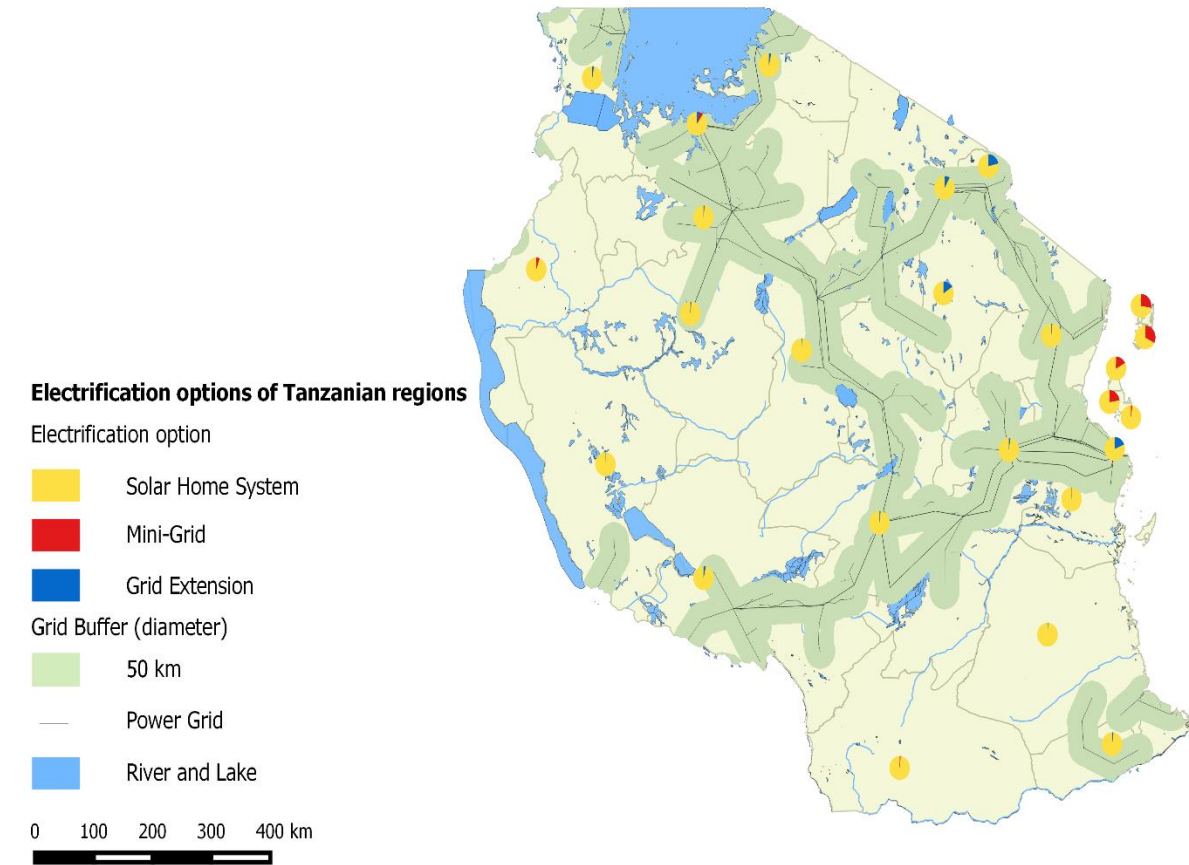

# Electricfrication option: GridBuilt-SHSDom

# Electricfrication option: GridBuilt-GridDom

Electrification options of Tanzanian regions

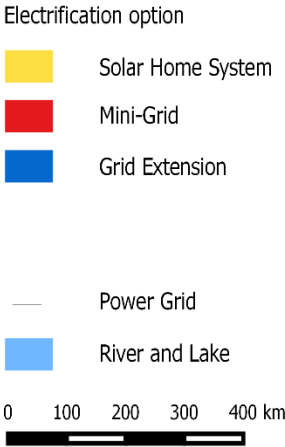

Electrification options of Tanzanian regions

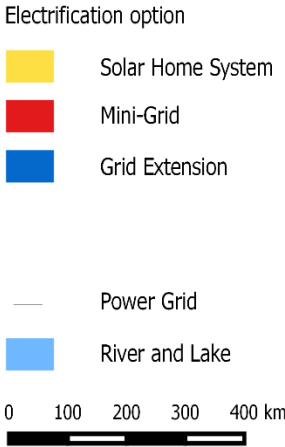

Share of electrification options in all Tanzanian regions

SHS (%) Mini-grid (%) Grid (%)

GridBuilt-GridDom

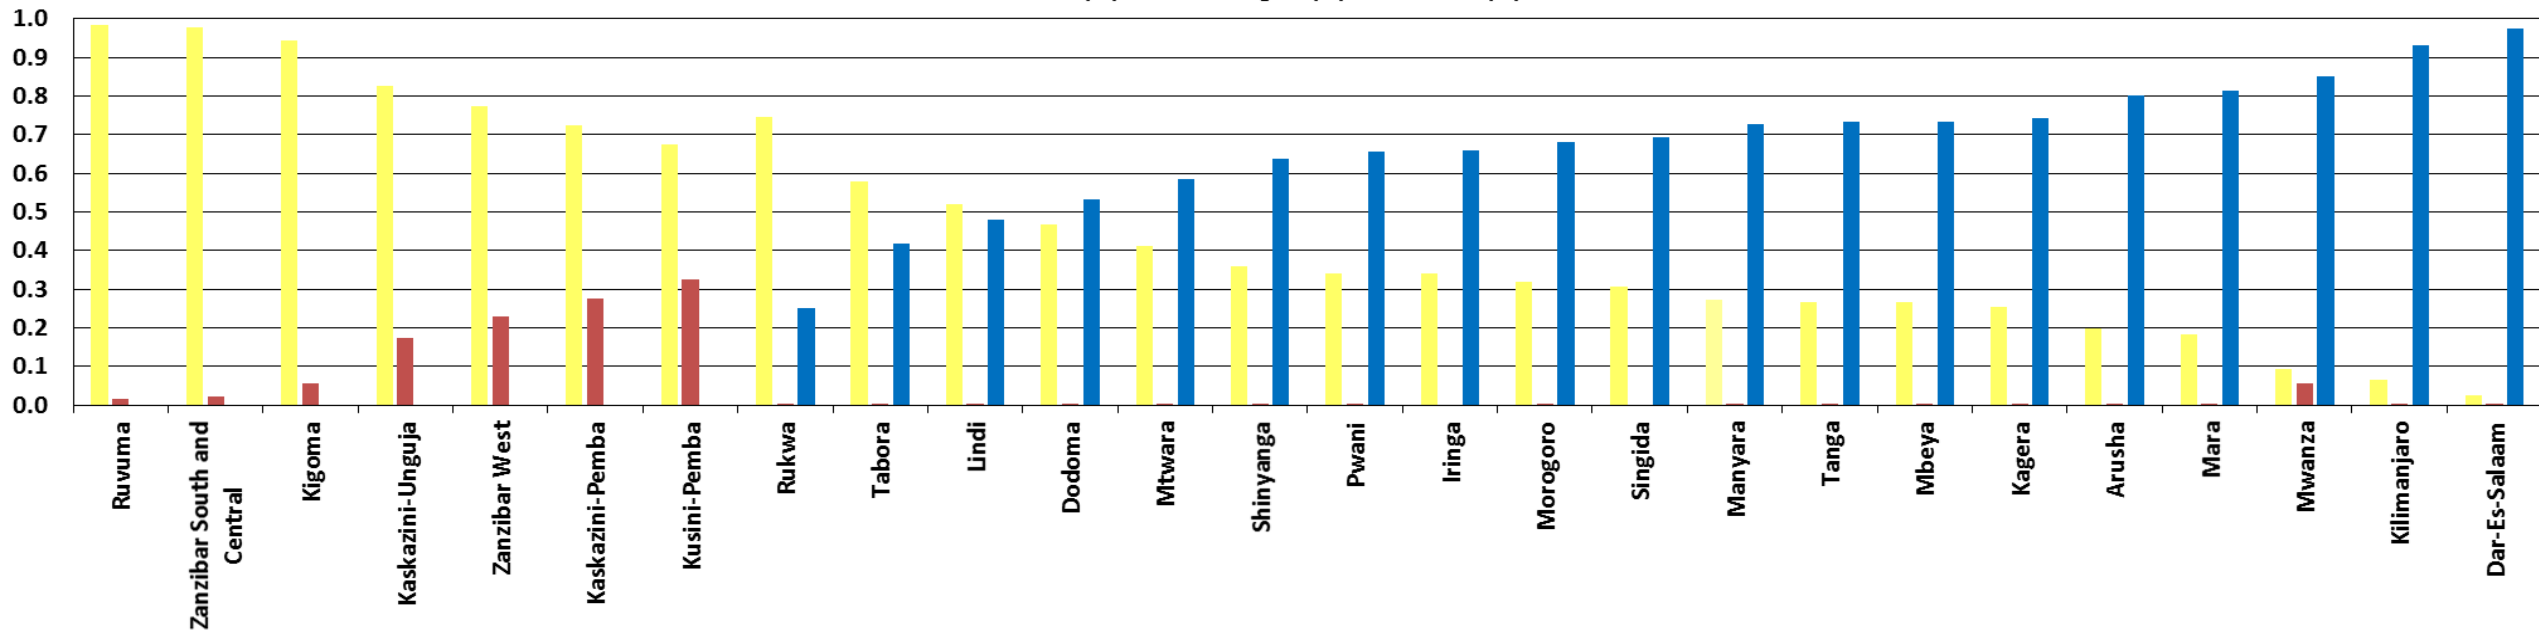

Share of electrification options in all Tanzanian regions

SHS (%) Mini-Grid (%) Grid (%)

GridBuilt-SHSDom

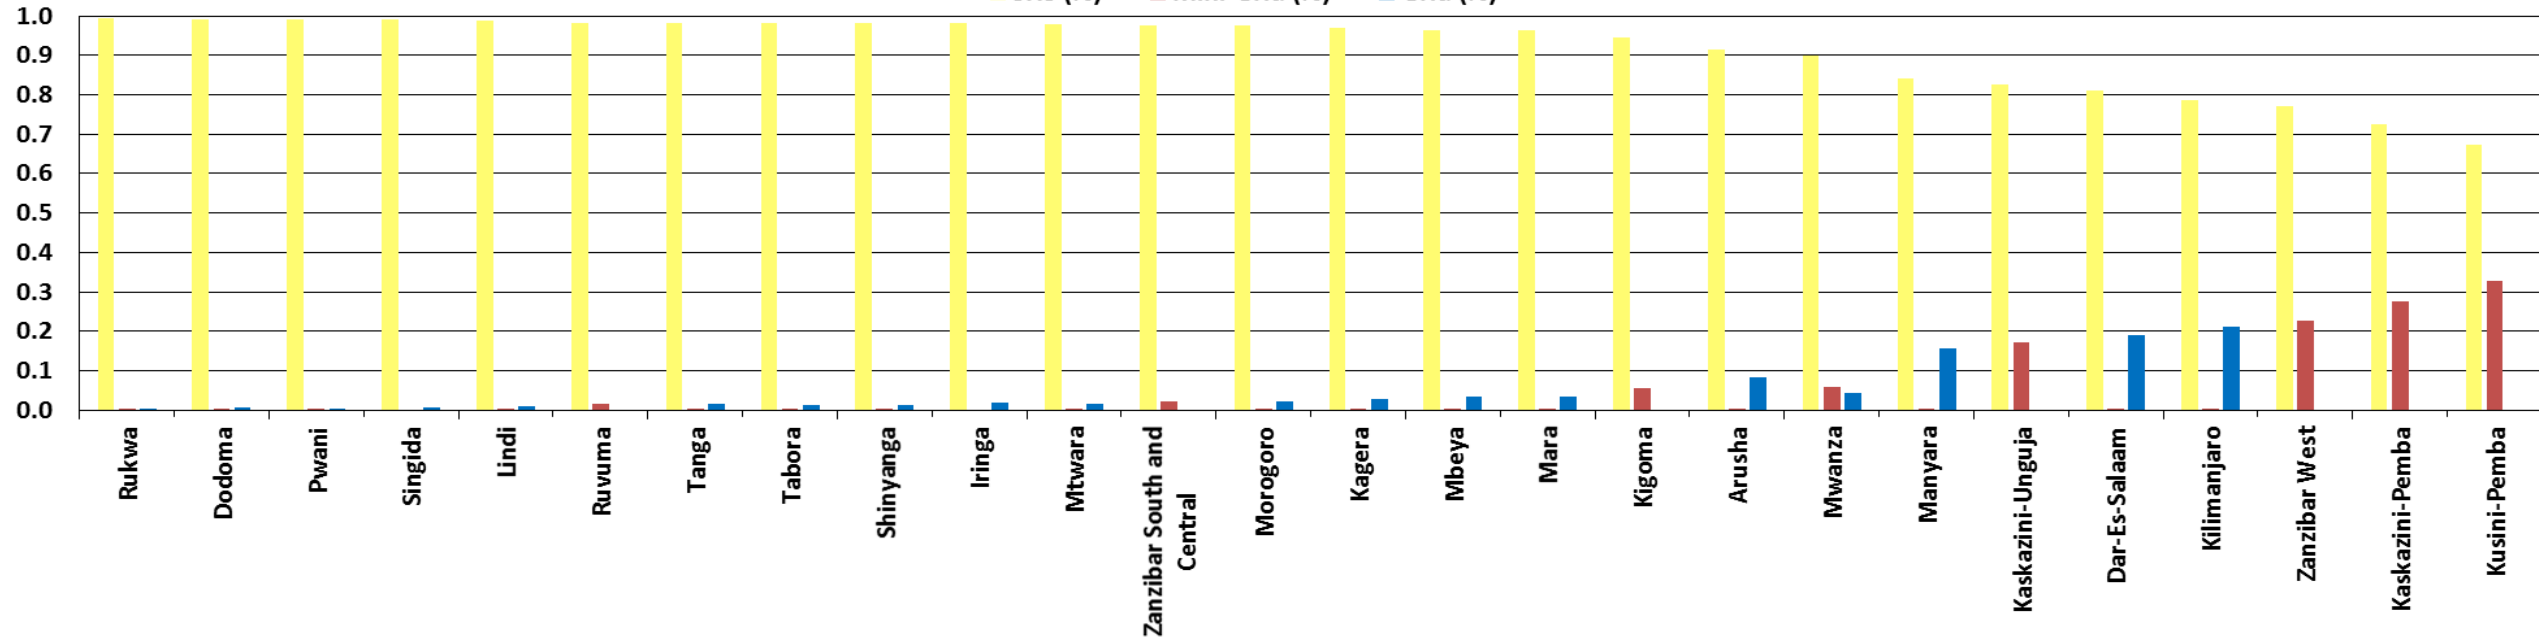

# Electricfrication option in all Tanzanian regions: GridPlanned-GridDom

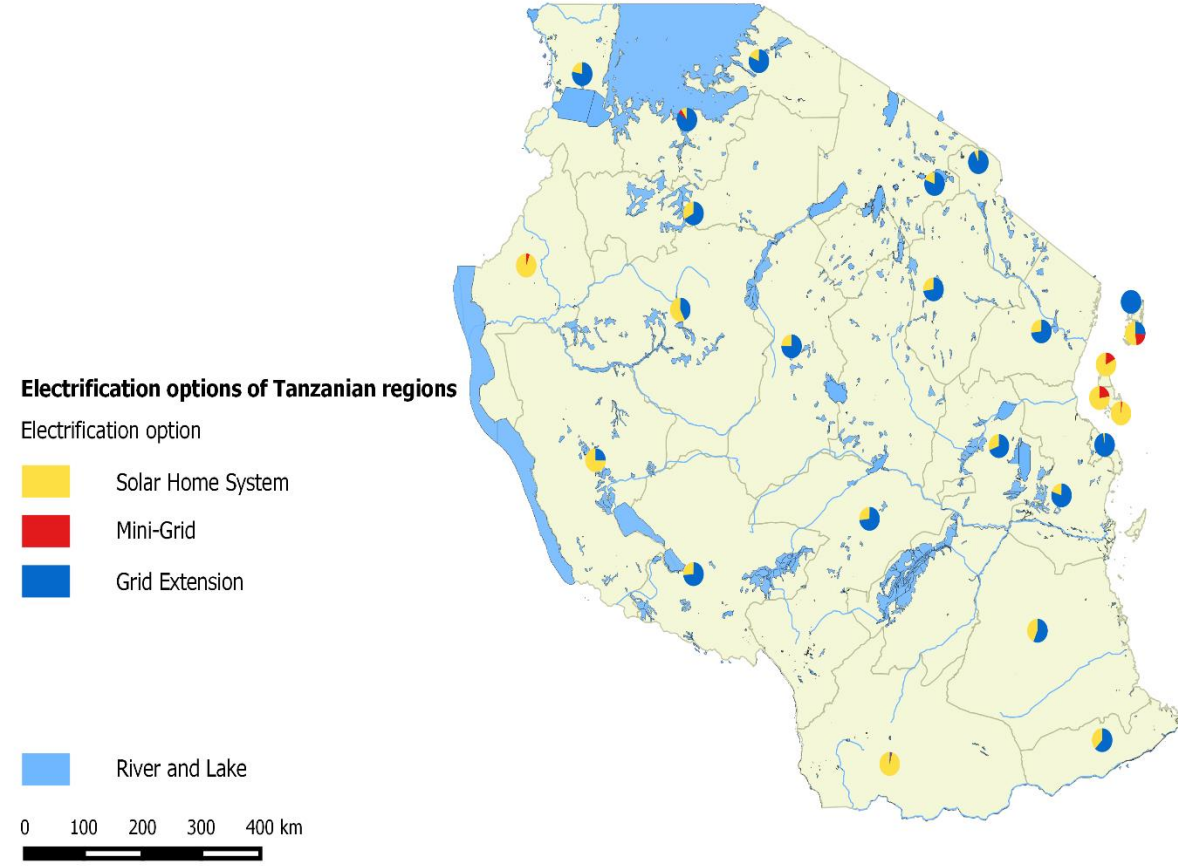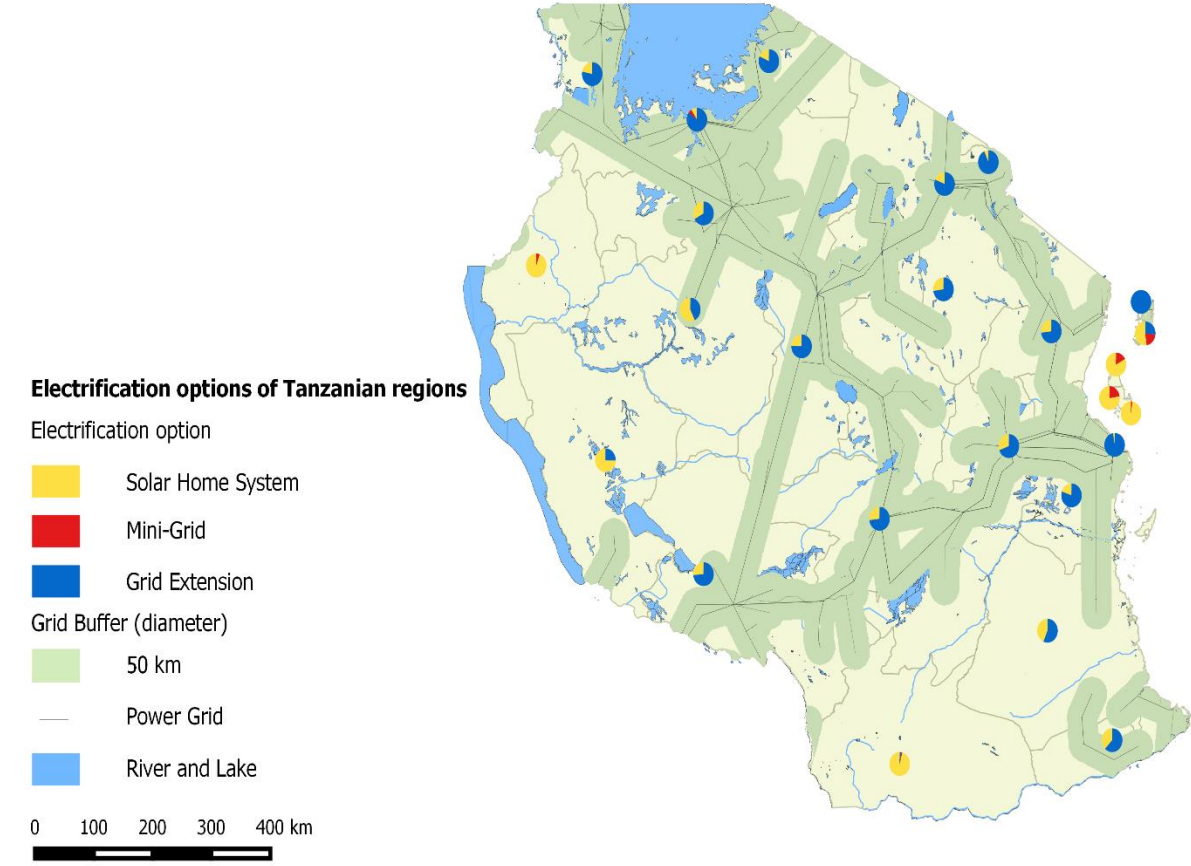

# Electricfrication option in all Tanzanian regions: GridPlanned-SHSDom

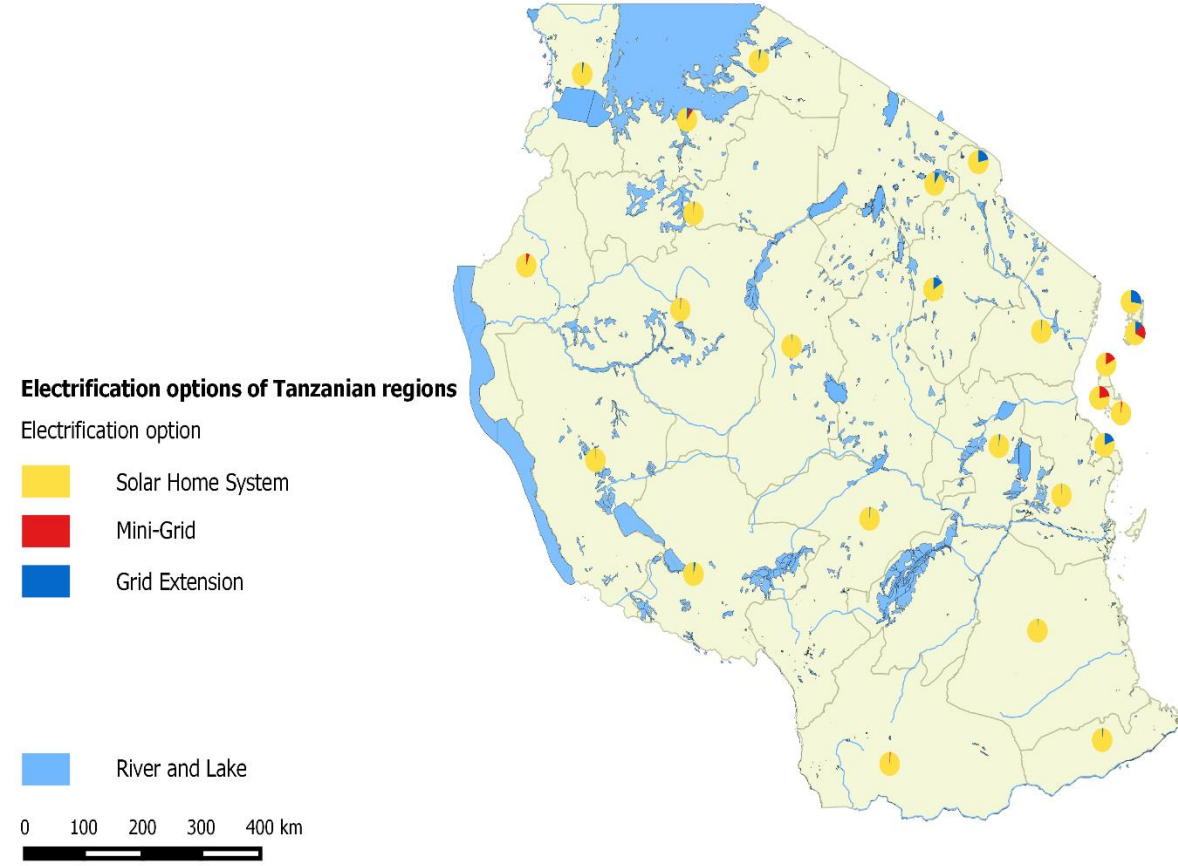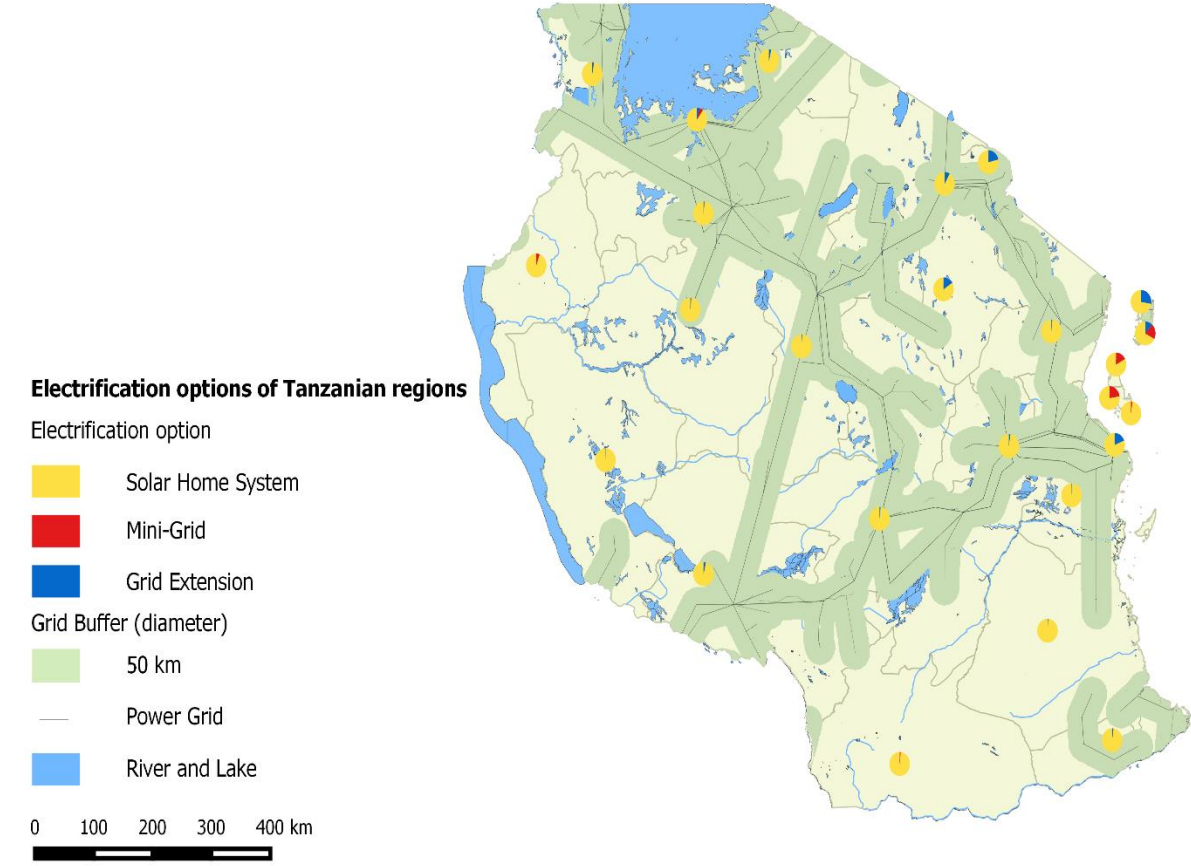

Electricfrication option: GridPlanned-SHSDom

Electricfrication option: GridPlanned-GridDom

Electrification options of Tanzanian regions

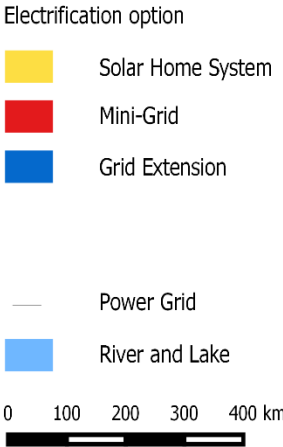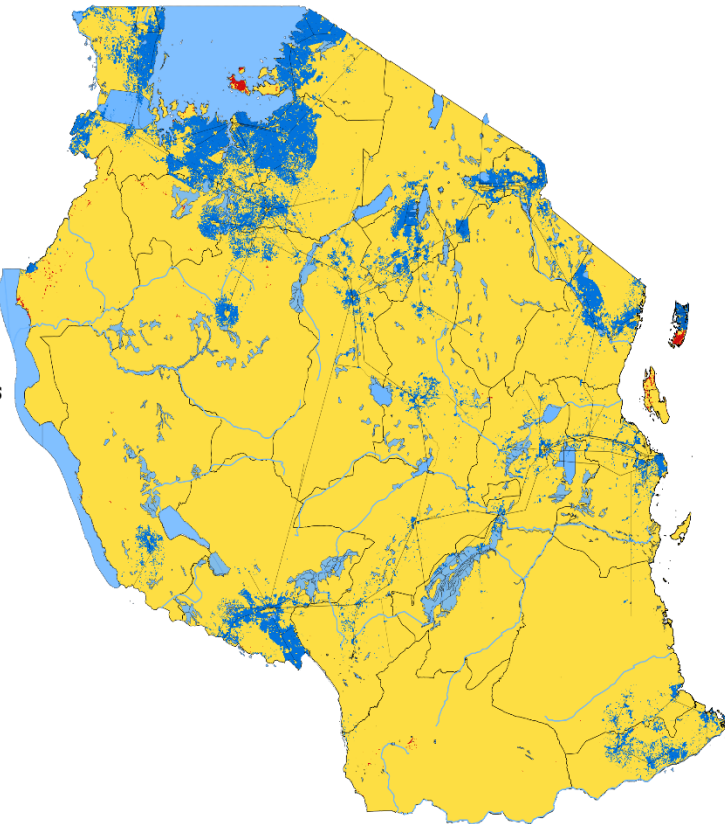

Electrification options of Tanzanian regions

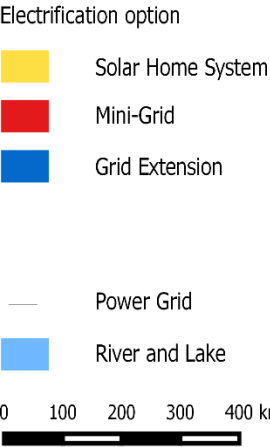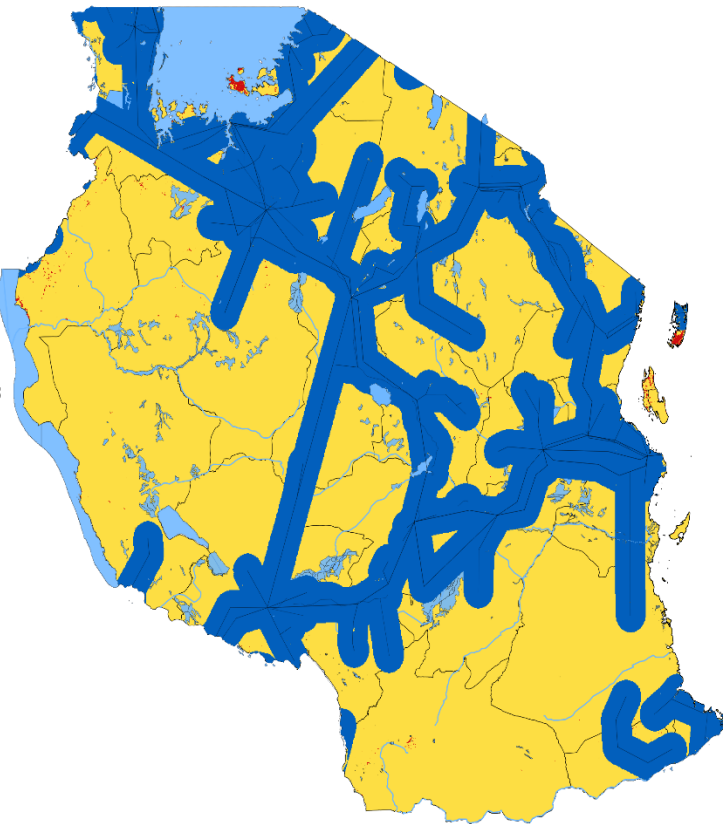

Share of electrification options in all Tanzanian regions

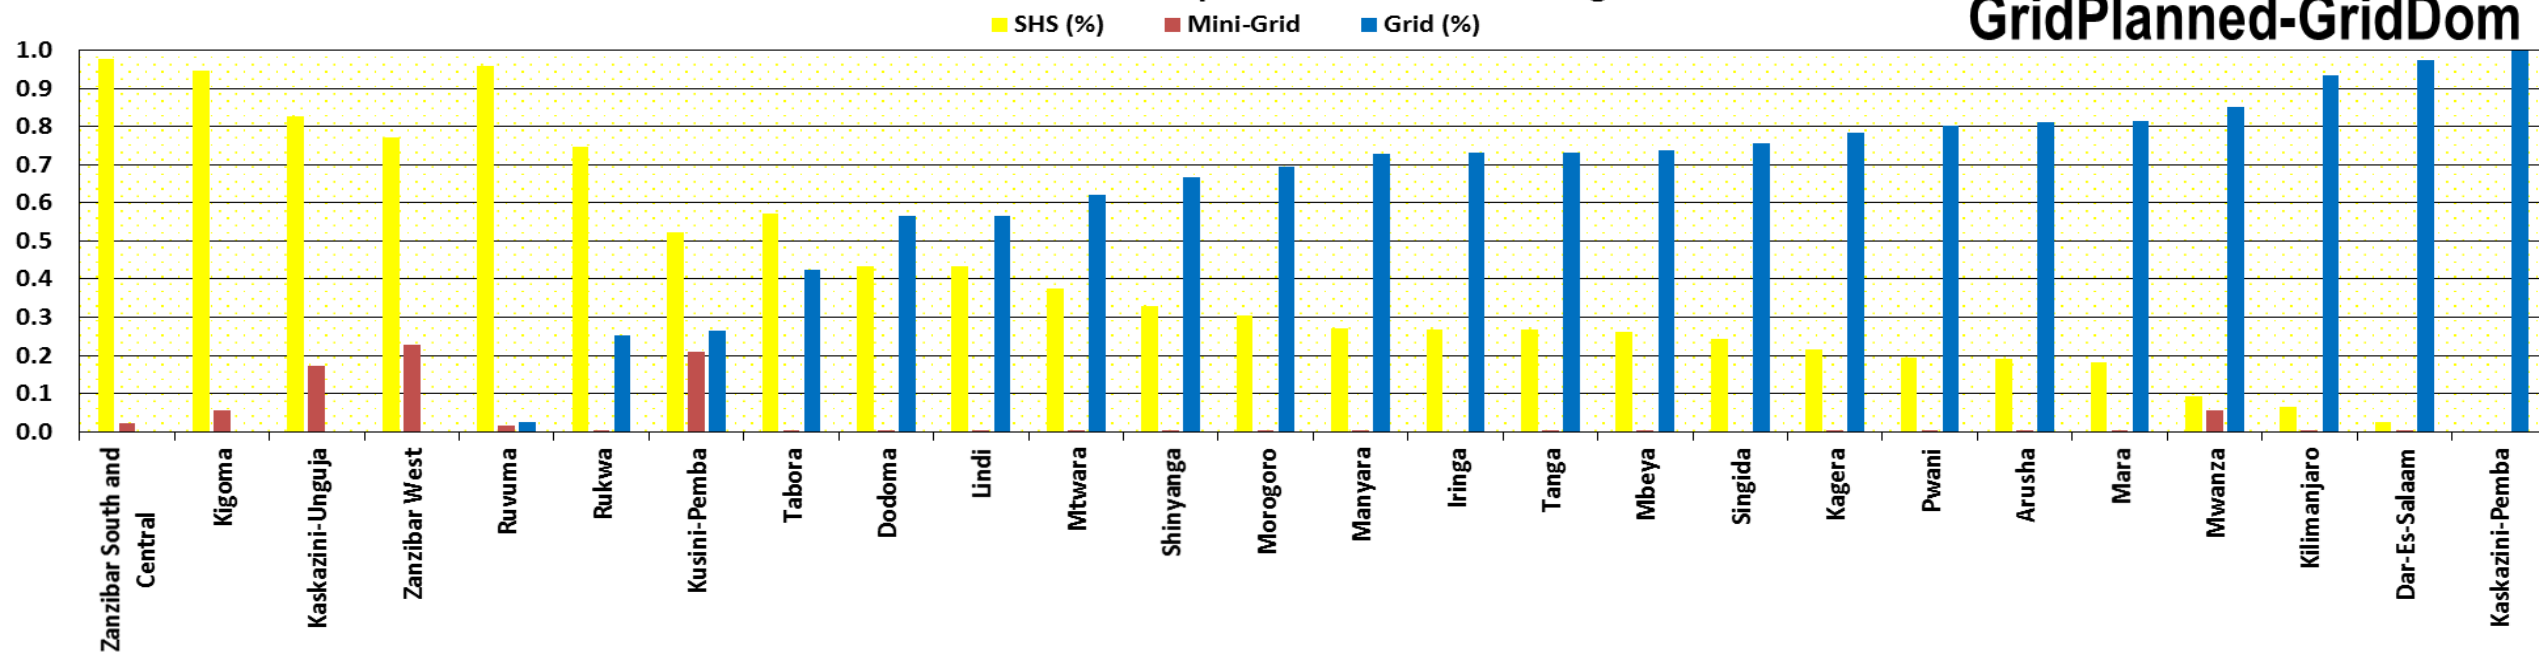

Share of electrification options in all Tanzanian regions

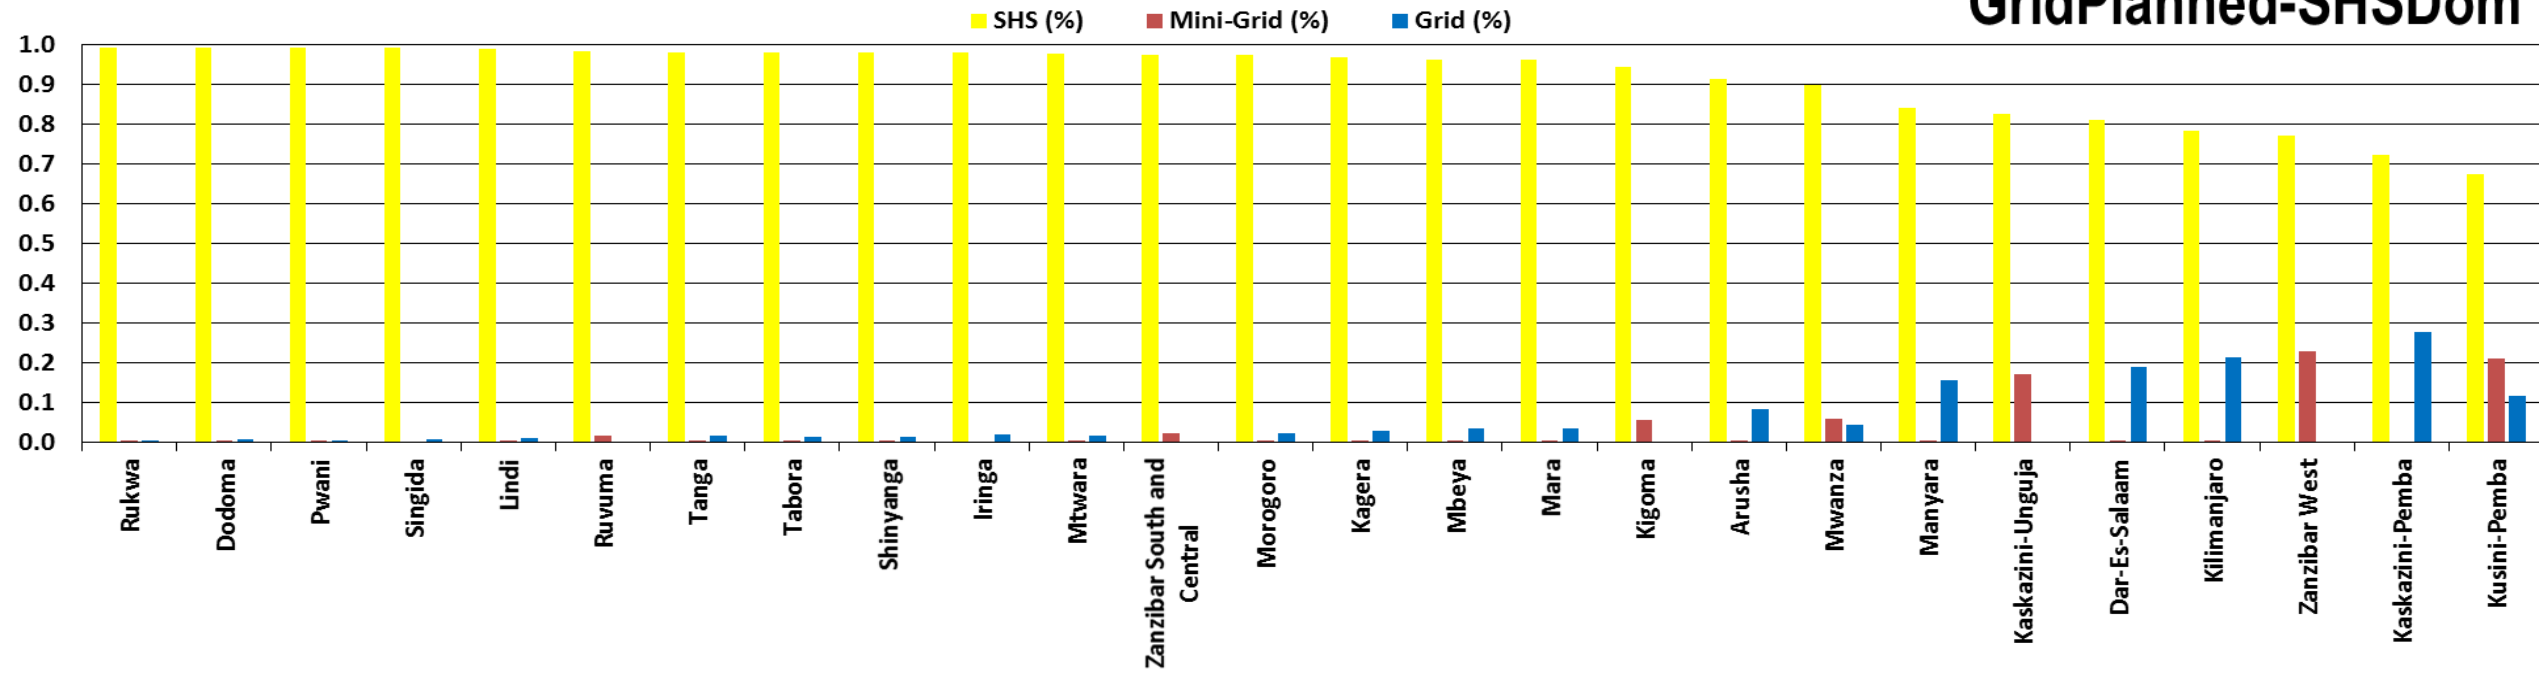

# Uganda

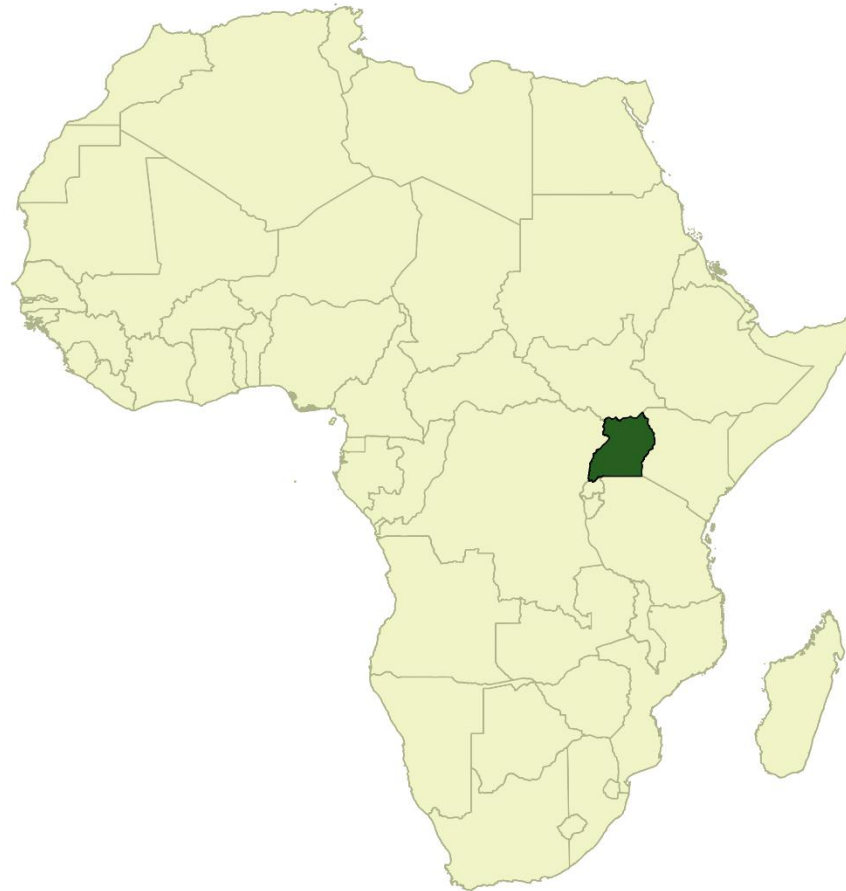

# Night light emission and Population of Ugandan regions

Night light emission in Uganda

Detected night lights

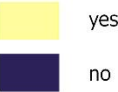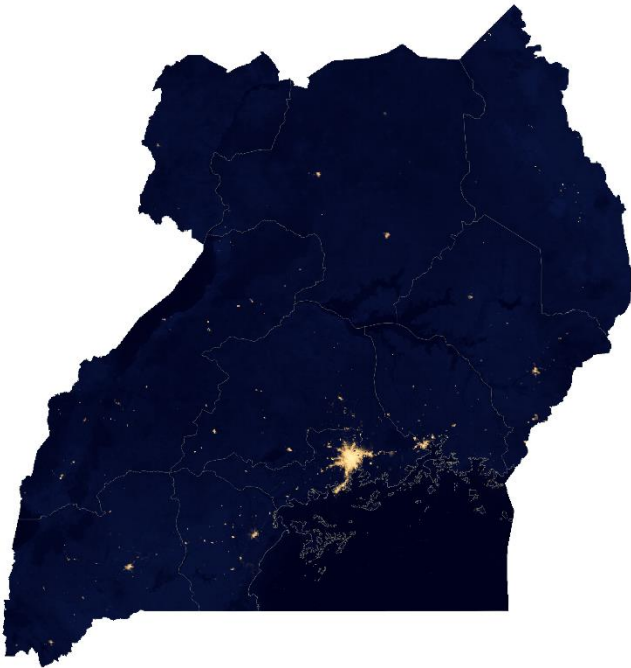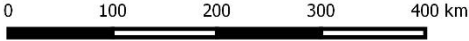

Population structure of Uganda

Population density (people/750x750m<sup>2</sup>)

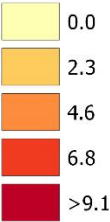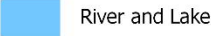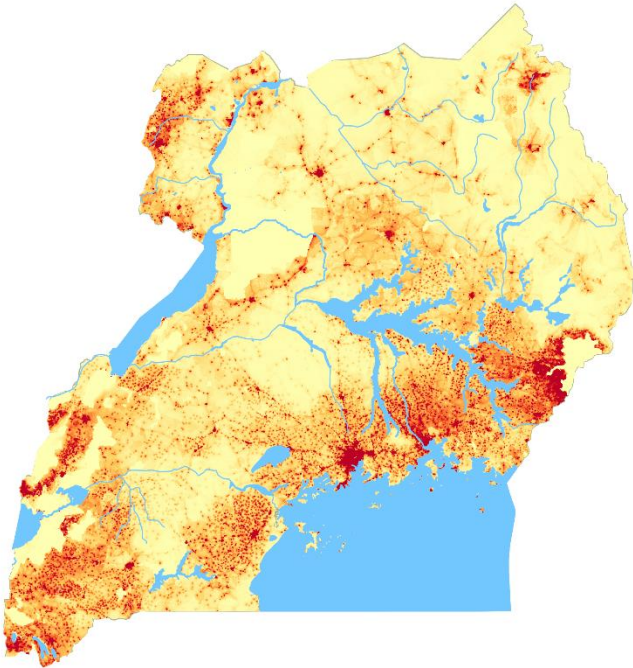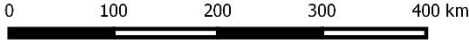

# Electrification option in all Ugandan regions: GridBuilt-GridDom

## Electrification options of Ugandan regions

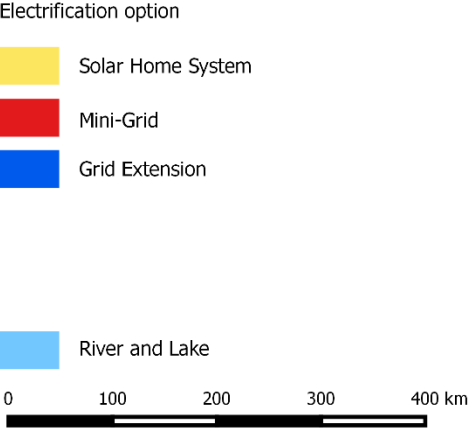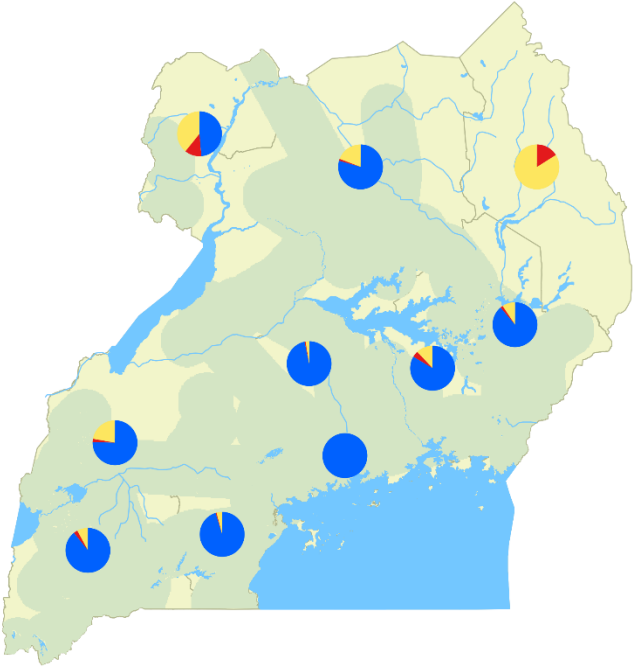

## Electrification options of Ugandan regions

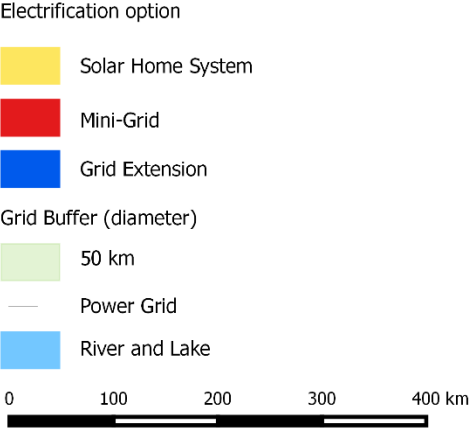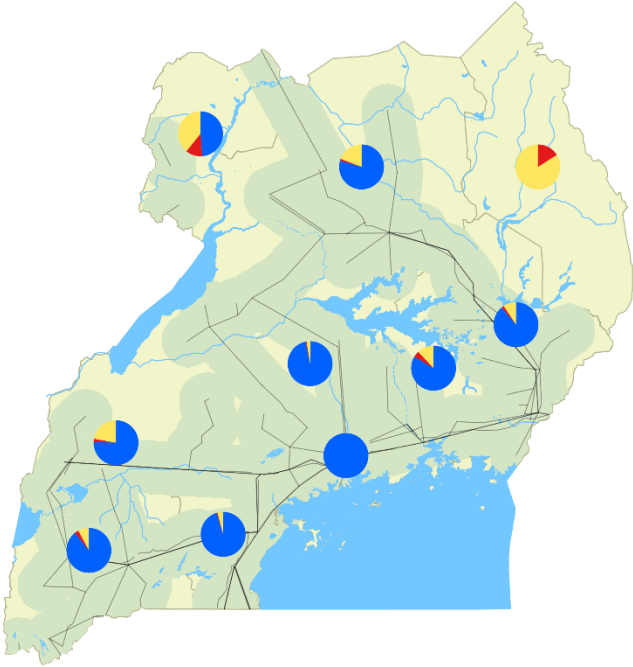

# Electrification option in all Ugandan regions: GridBuilt-SHSDom

**Electrification options of Ugandan regions**

Electrification option

- Solar Home System
- Mini-Grid
- Grid Extension

River and Lake

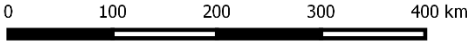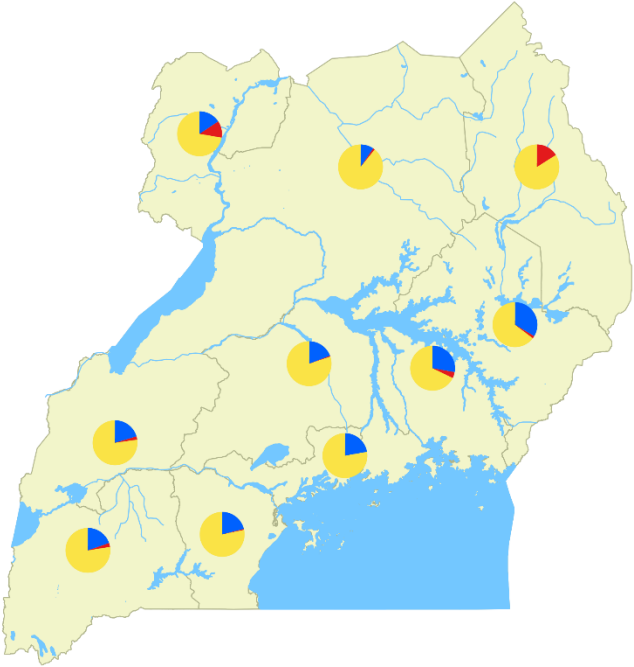

**Electrification options of Ugandan regions**

Electrification option

- Solar Home System
- Mini-Grid
- Grid Extension

Grid Buffer (diameter)

- 50 km
- Power Grid
- River and Lake

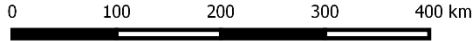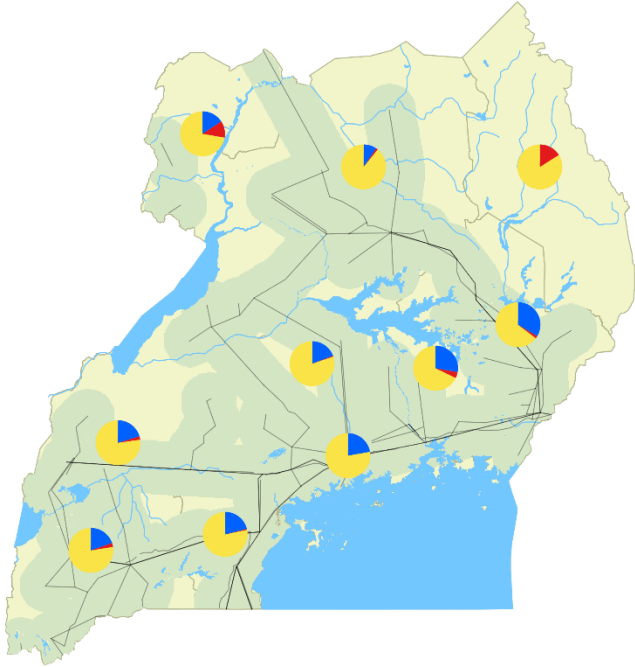

# Electrification option: GridBuilt-SHSDom

Electrification options of Ugandan regions

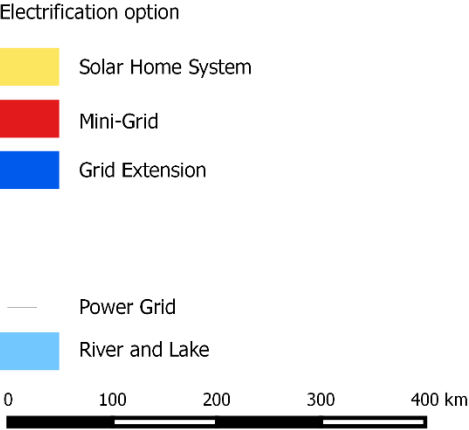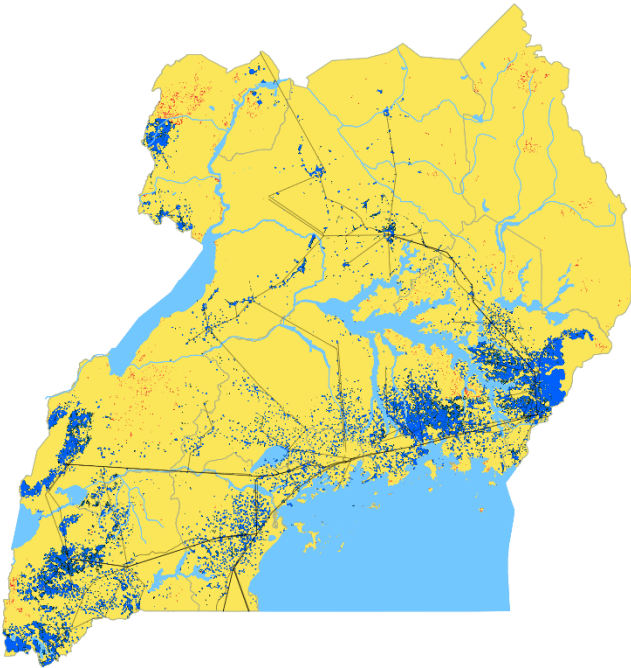

# Electrification option: GridBuilt-GridDom

Electrification options of Ugandan regions

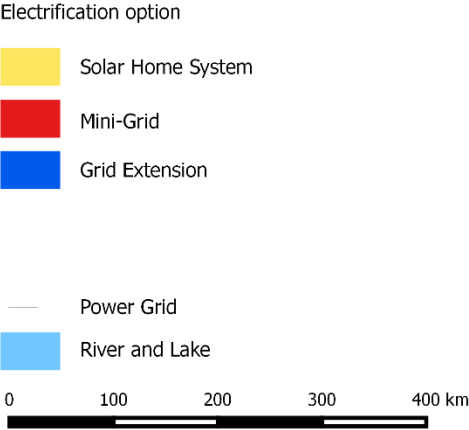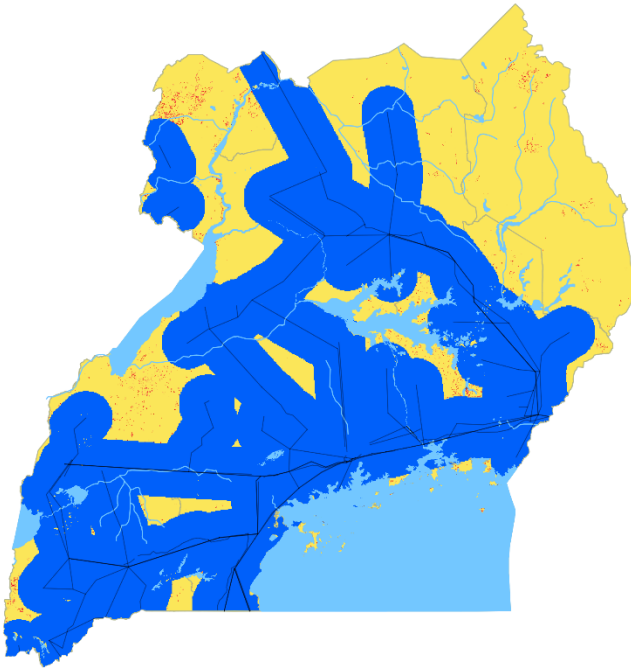

Share of electricity options in all Ugandan regions

SHS (%) Mini-Grid (%) Grid (%)

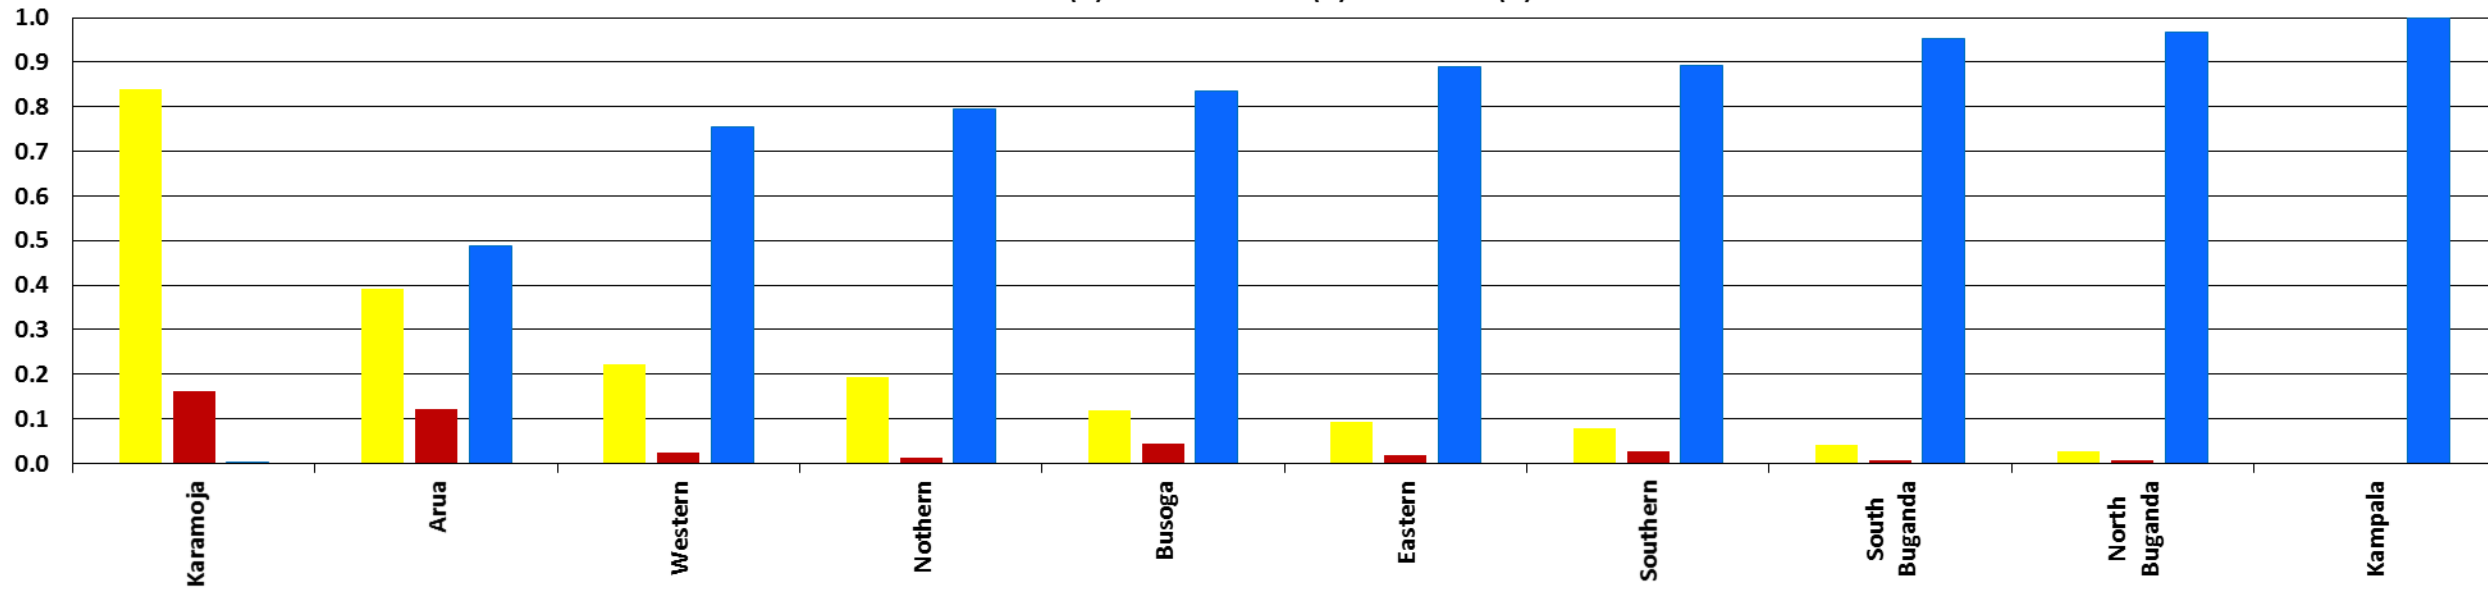

Share of electricity options in all Ugandan regions

SHS (%) Mini-Grid (%) Grid (%)

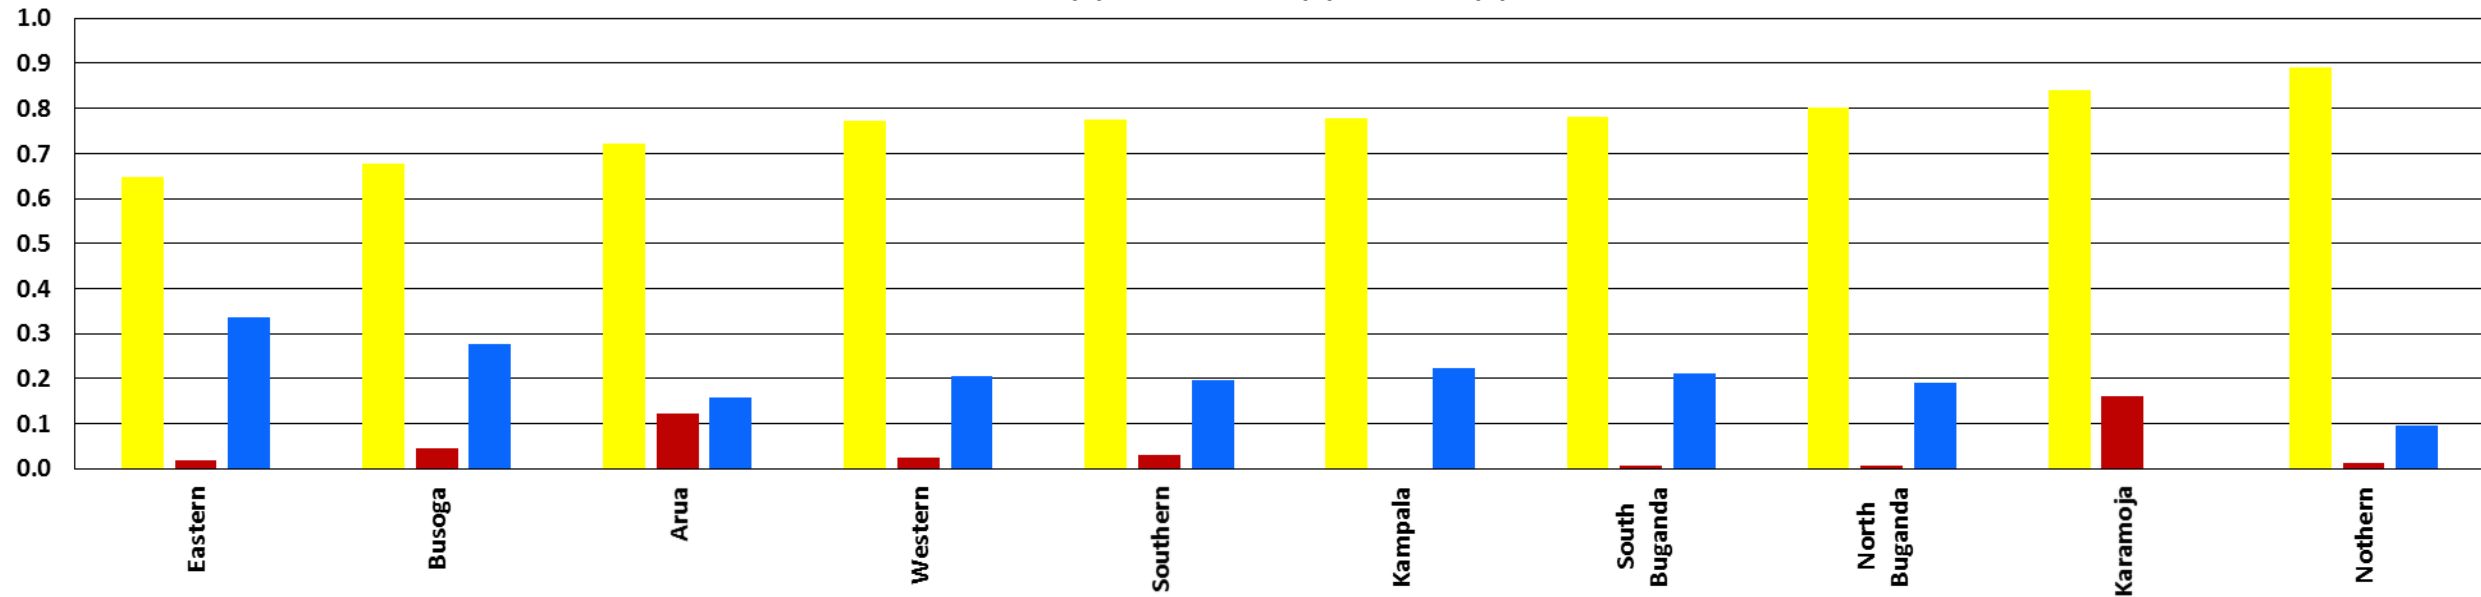

# Electrification option in all Ugandan regions: GridPlanned-GridDom

## Electrification options of Ugandan regions

Electrification option

- Solar Home System
- Mini-Grid
- Grid Extension

River and Lake

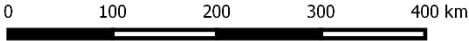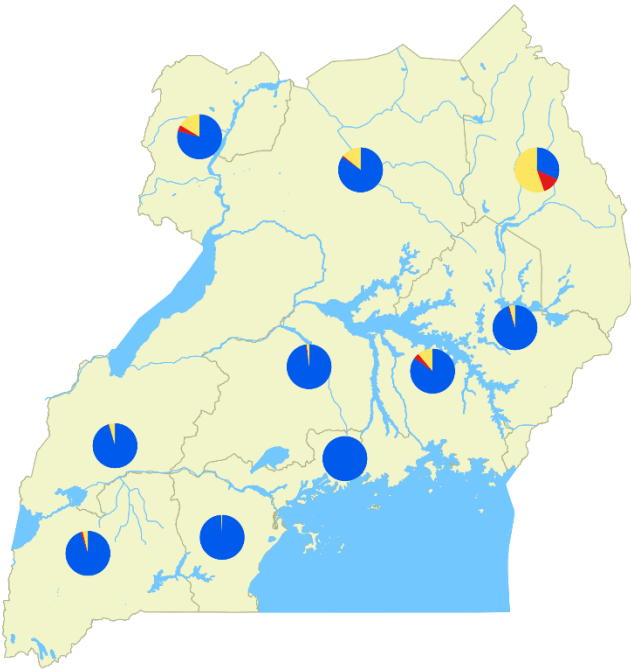

## Electrification options of Ugandan regions

Electrification option

- Solar Home System
- Mini-Grid
- Grid Extension

Grid Buffer (diameter)

- 50 km
- Power Grid
- River and Lake

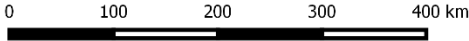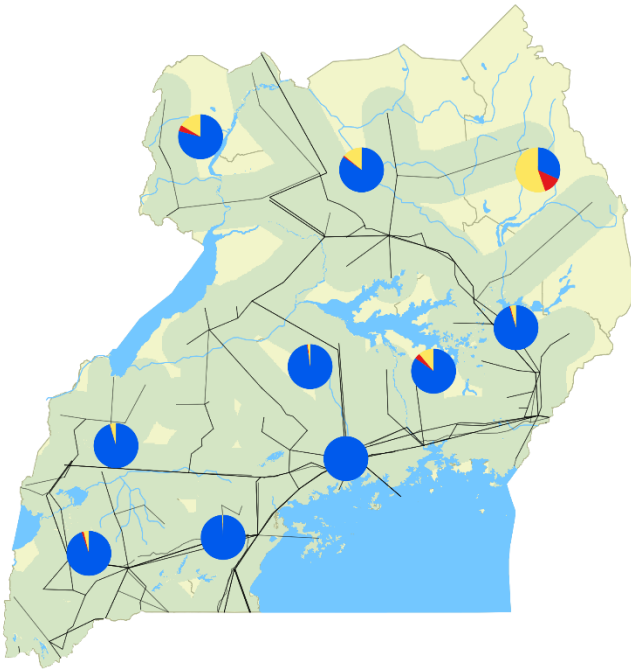

# Electrification option in all Ugandan regions: GridPlanned-SHSDom

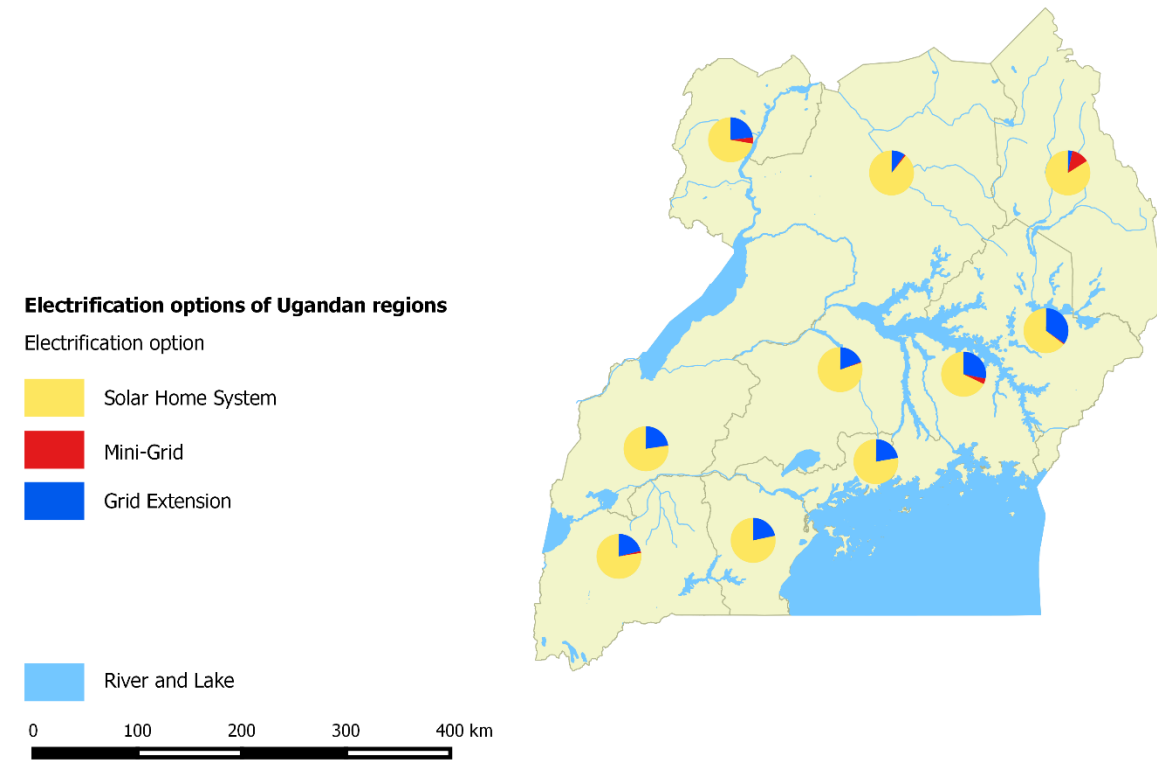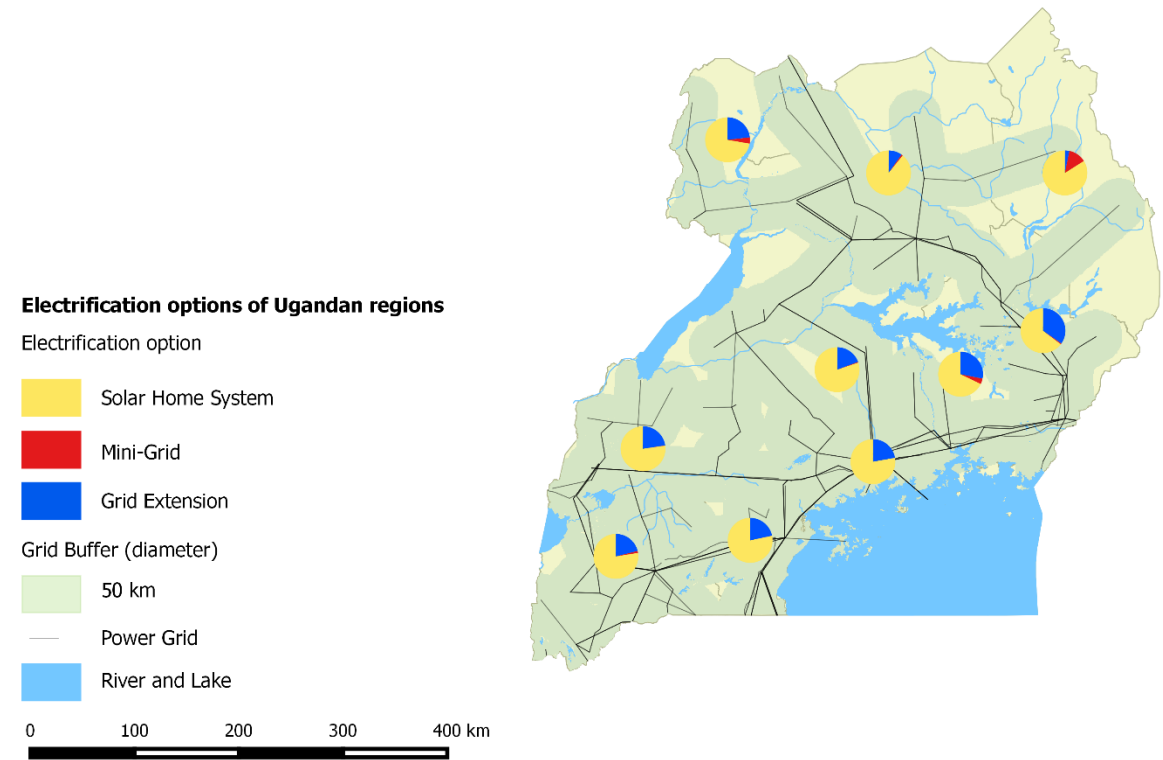

# Electrification option: GridPlanned-SHSDom

# Electrification option: GridPlanned-GridDom

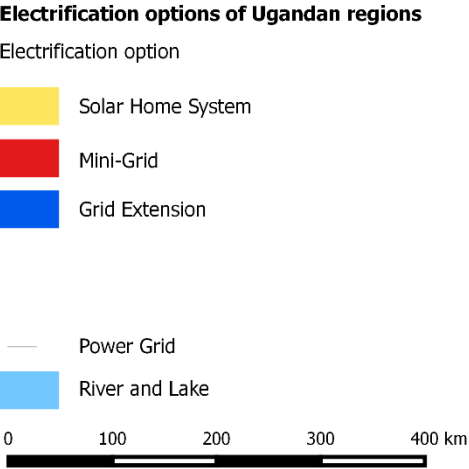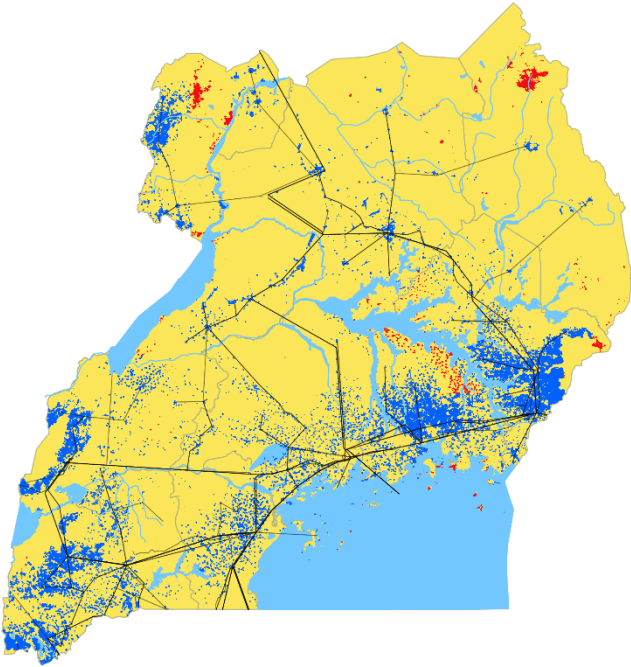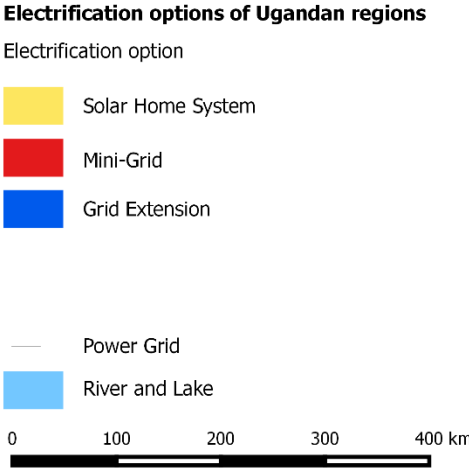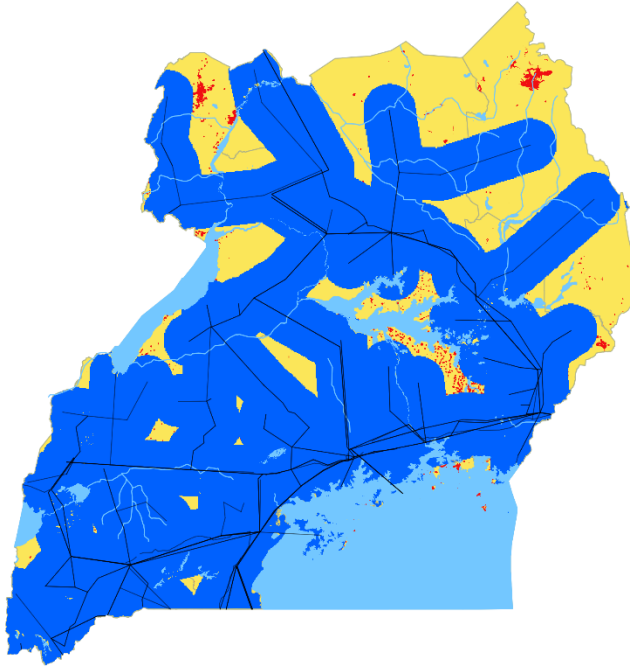

Share of electricity options in all Ugandan regions

SHS (%) Mini-Grid (%) Grid (%)

GridPlanned-GridDom

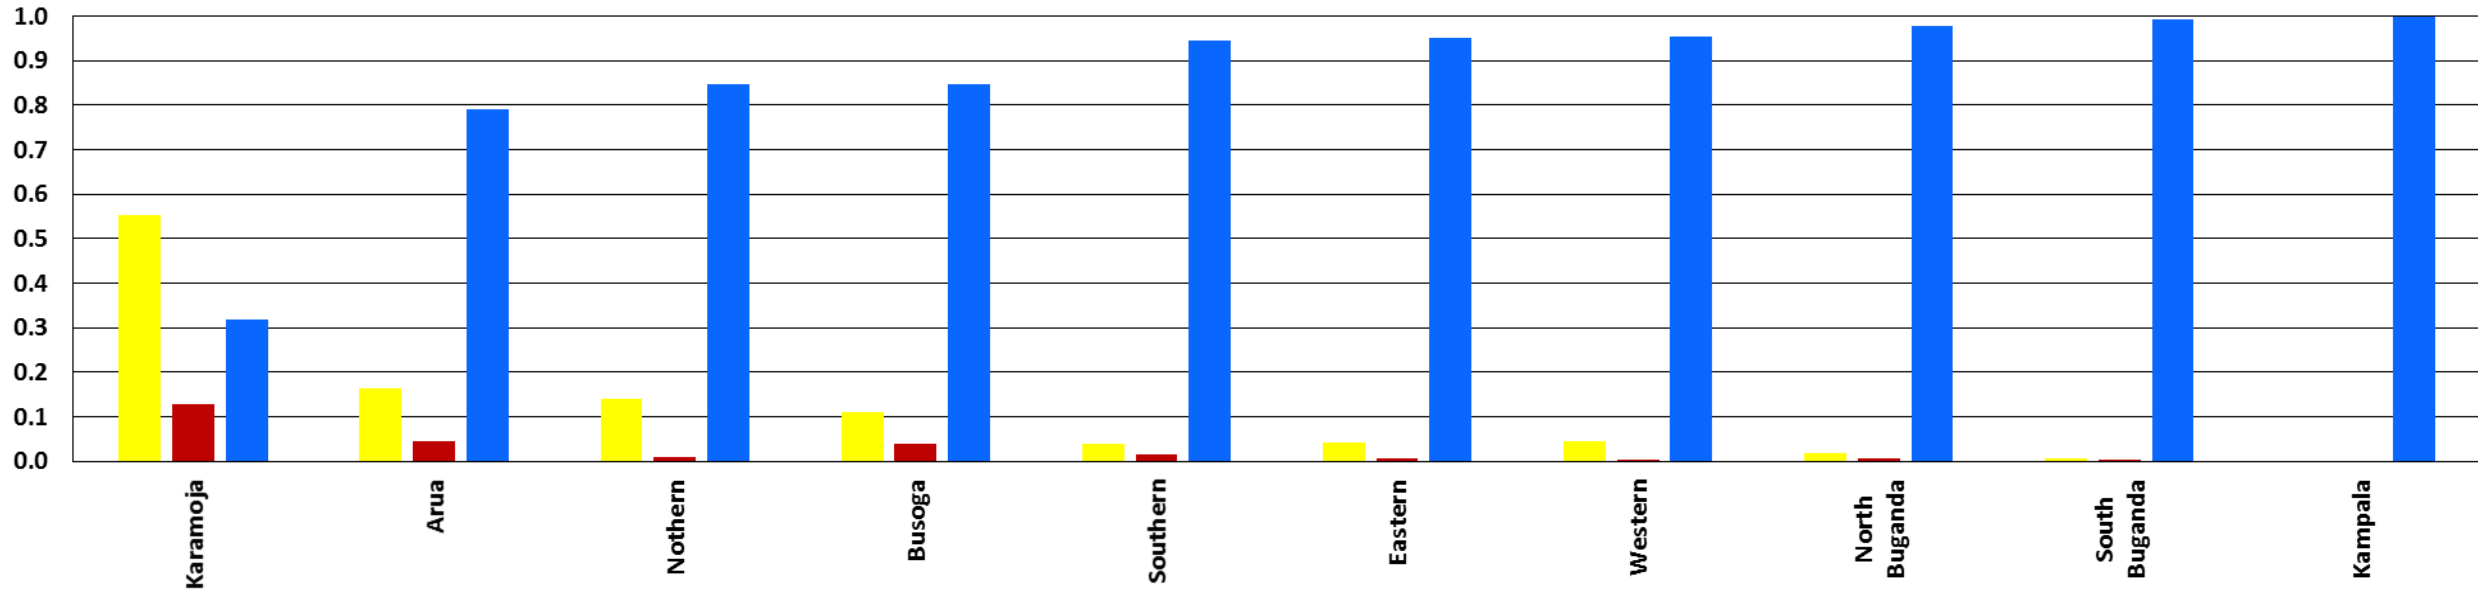

Share of electricity options in all Ugandan regions

SHS (%) Mini-Grid (%) Grid (%)

GridPlanned-SHSDom

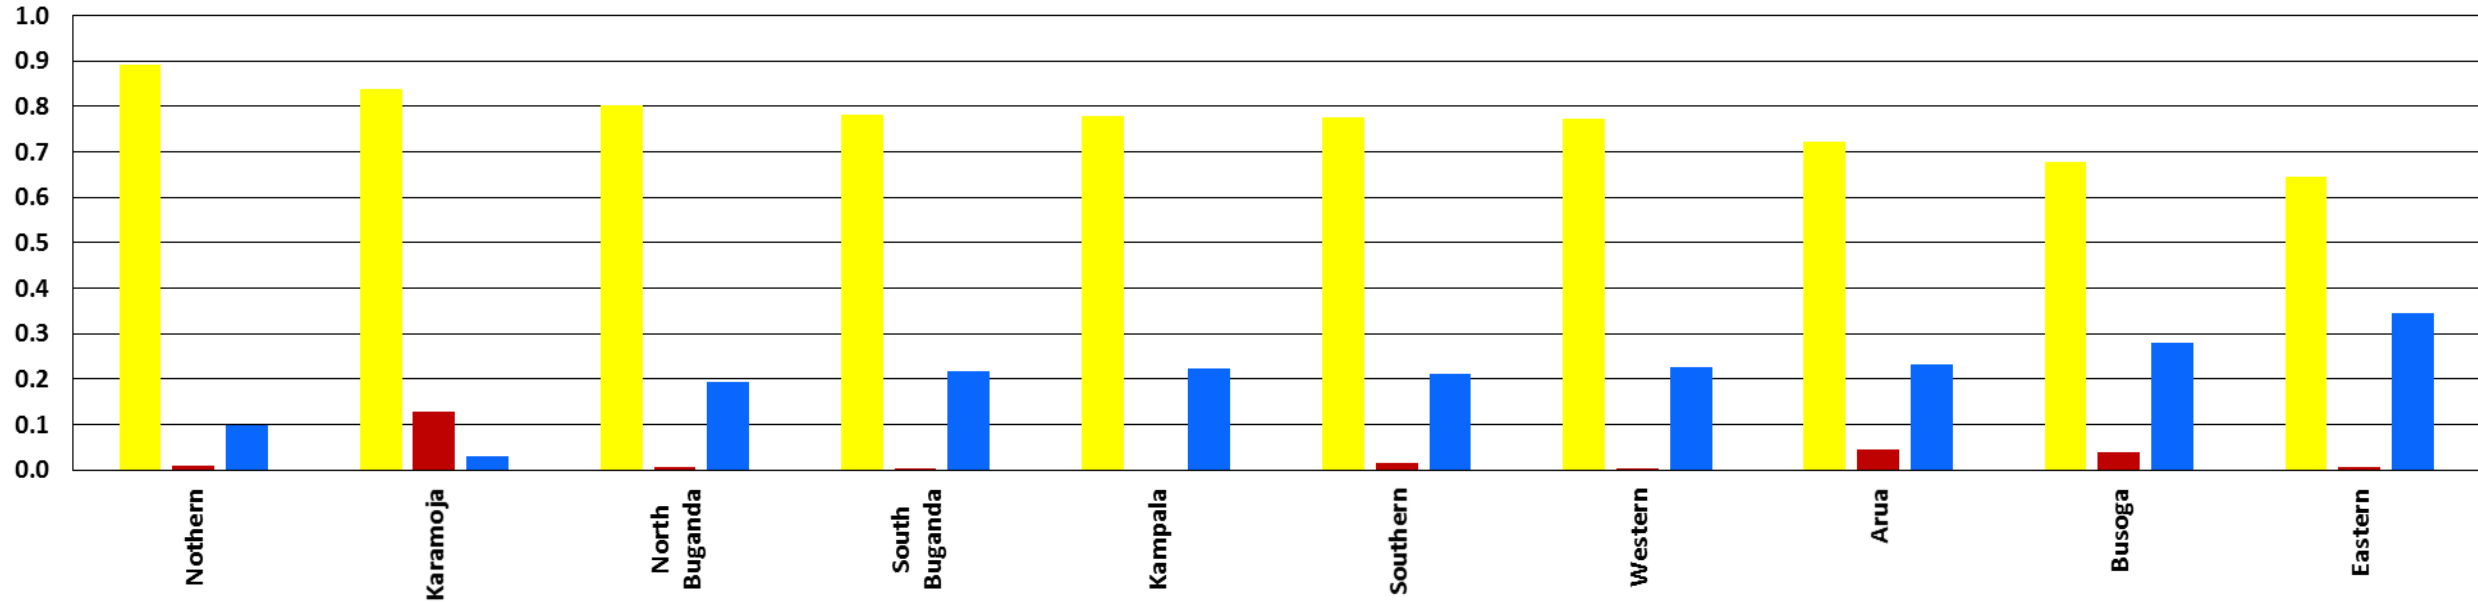

# Zambia

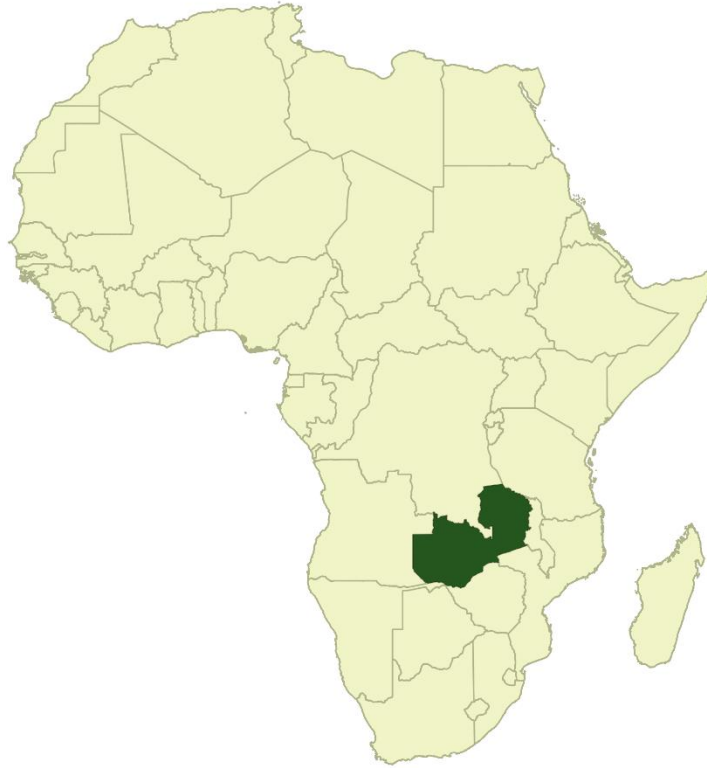

# Night light emission and Population of Zambian regions

## Night light emission in Zambia

Detected night lights

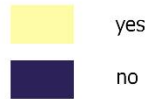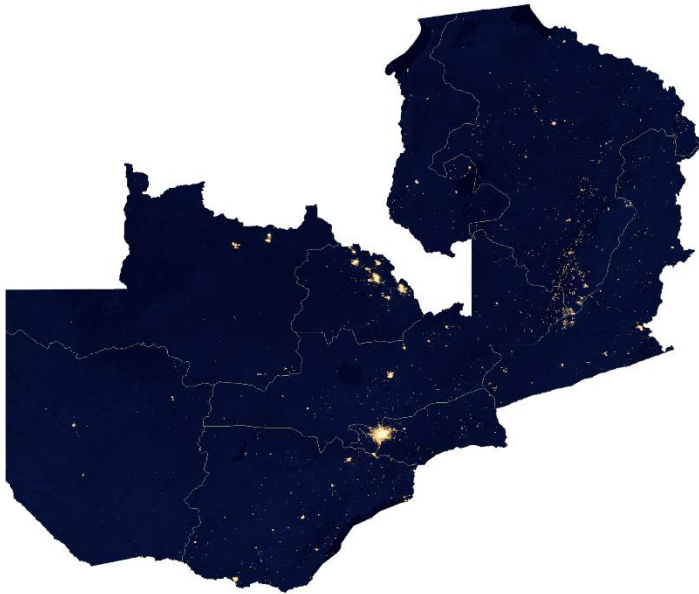

0 100 200 300 400 km

## Population structure of Zambia

Population density (people/750x750m<sup>2</sup>)

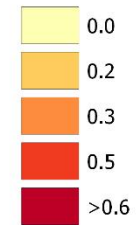

River and Lake (blue)

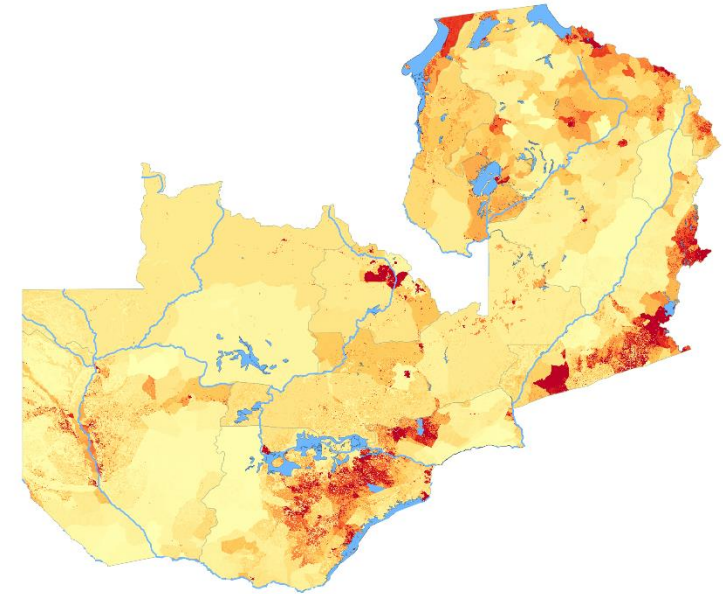

0 100 200 300 400 km

# Electrification option in all Zambian regions: GridBuilt-GridDom

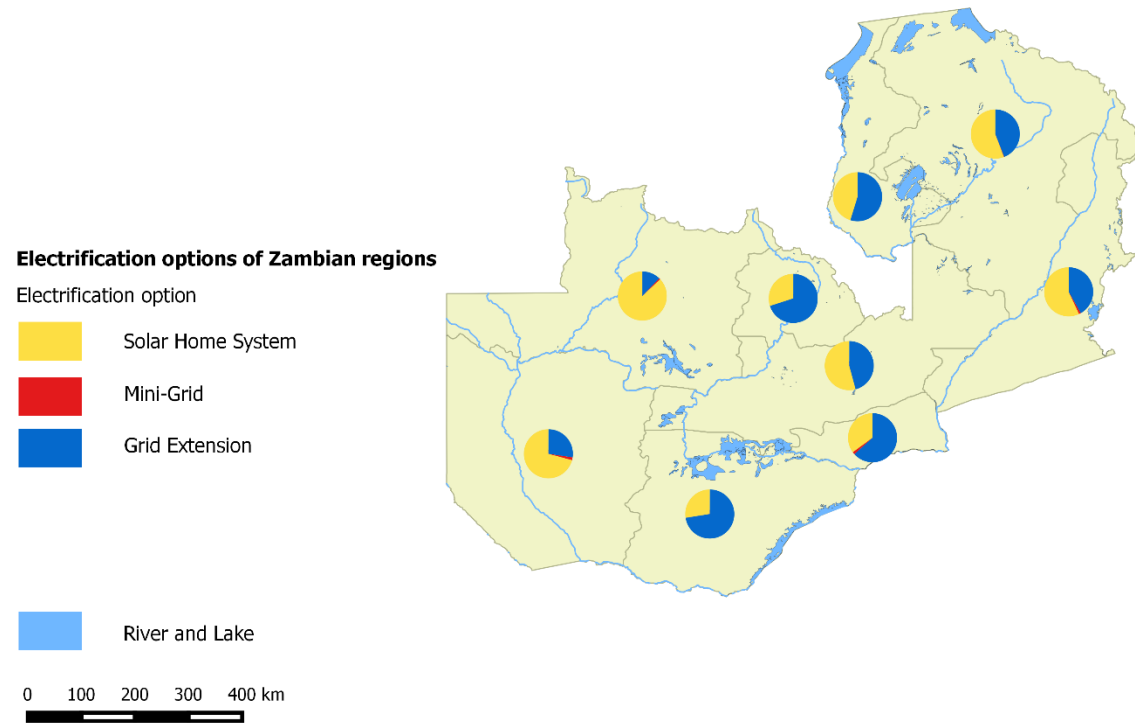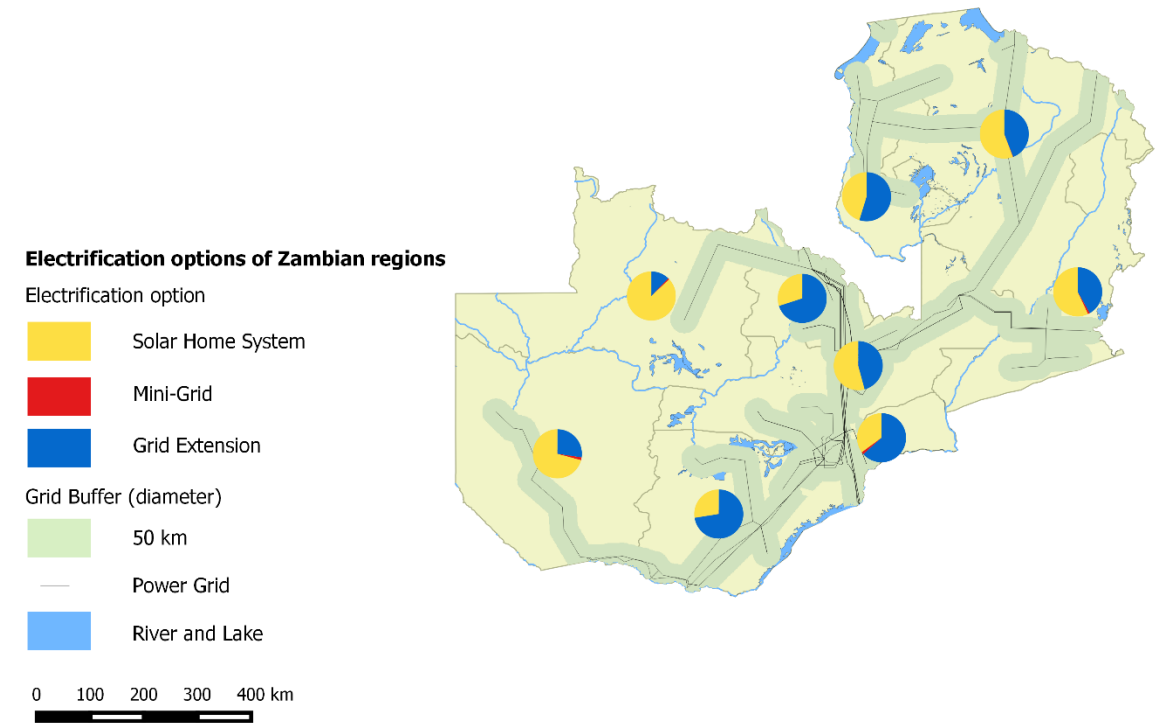

# Electrification option in all Zambian regions: GridBuilt-SHSDom

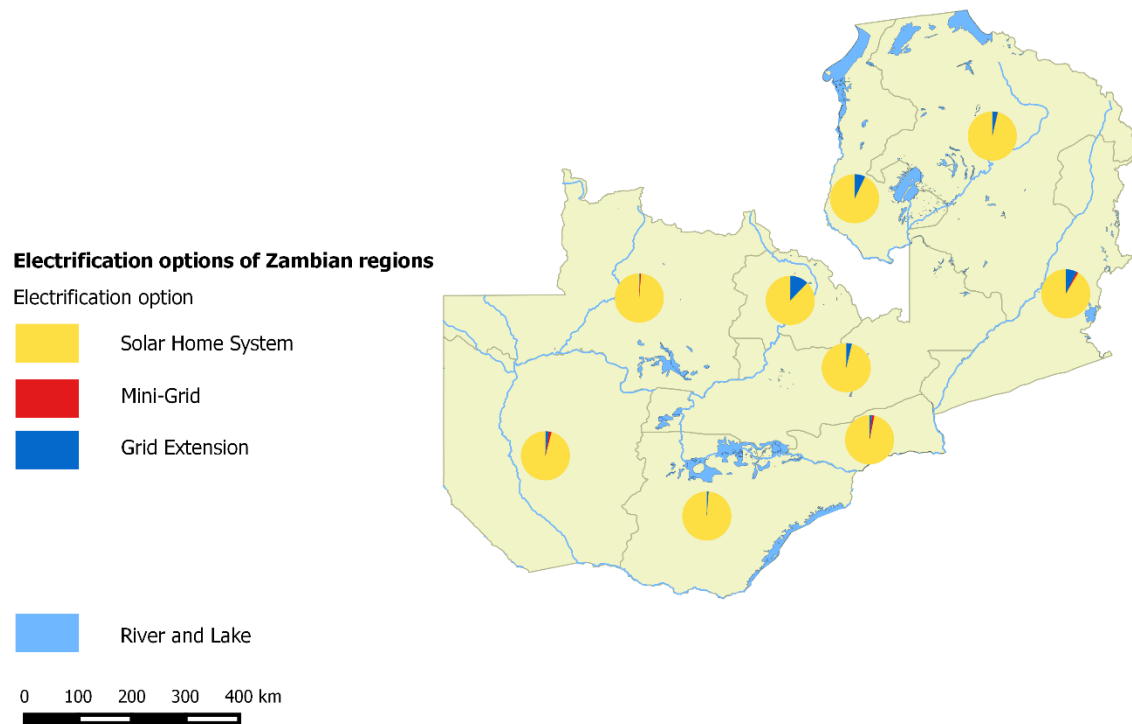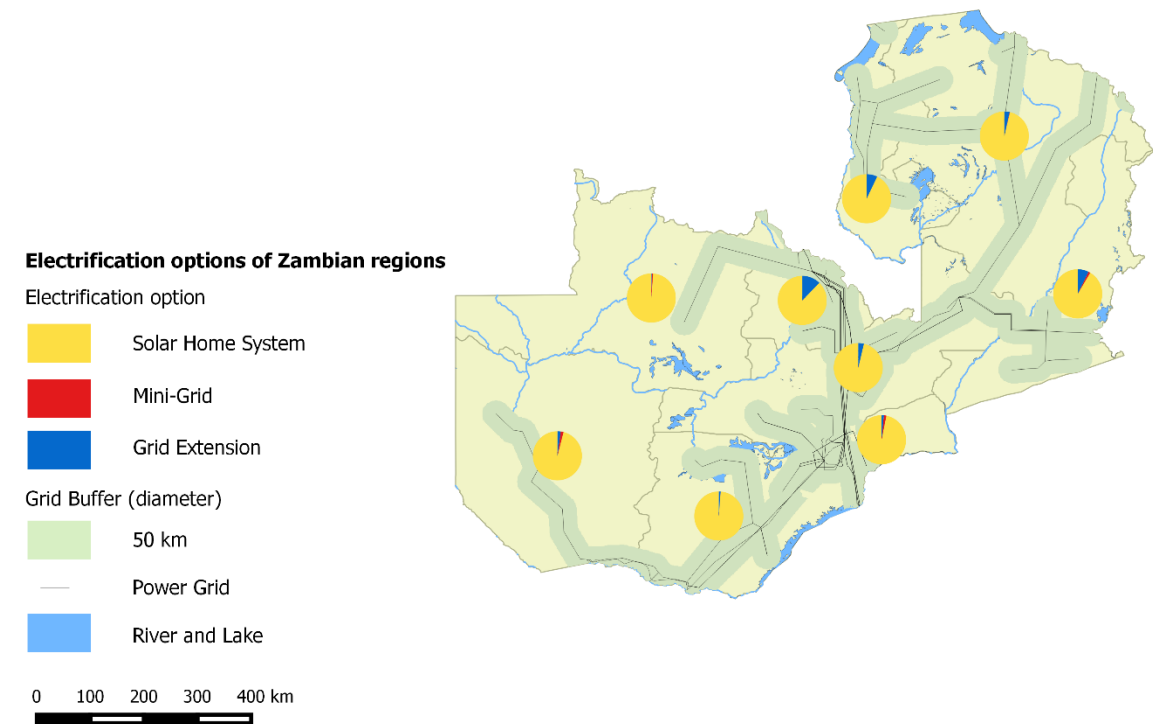

# Electrification option: GridBuilt-SHSDom

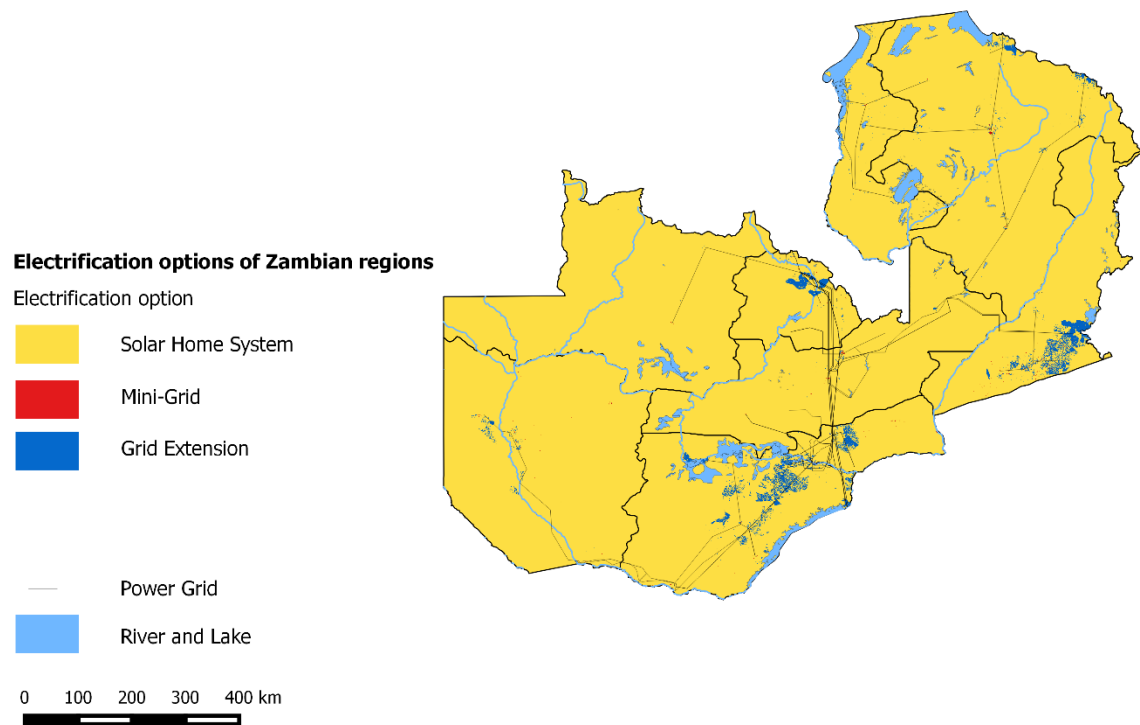

# Electrification option: GridBuilt-GridDom

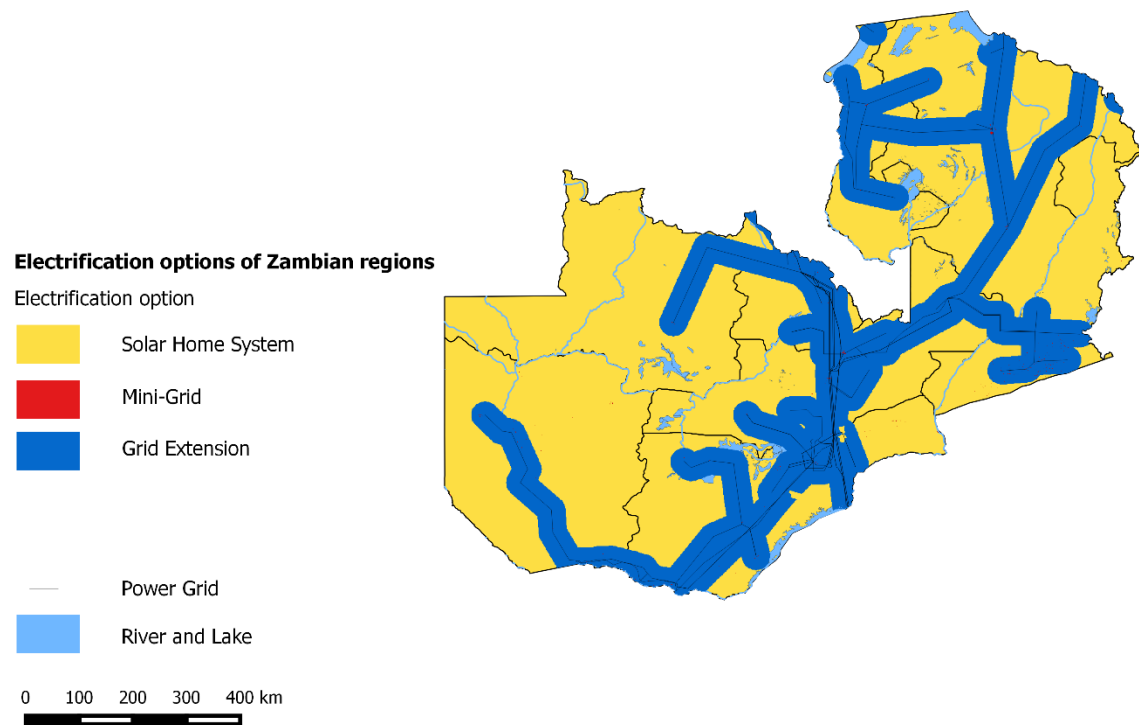

Share of electrification options in all Zambian regions

SHS (%) Mini-Grid (%) Grid (%)

GridBuilt-GridDom

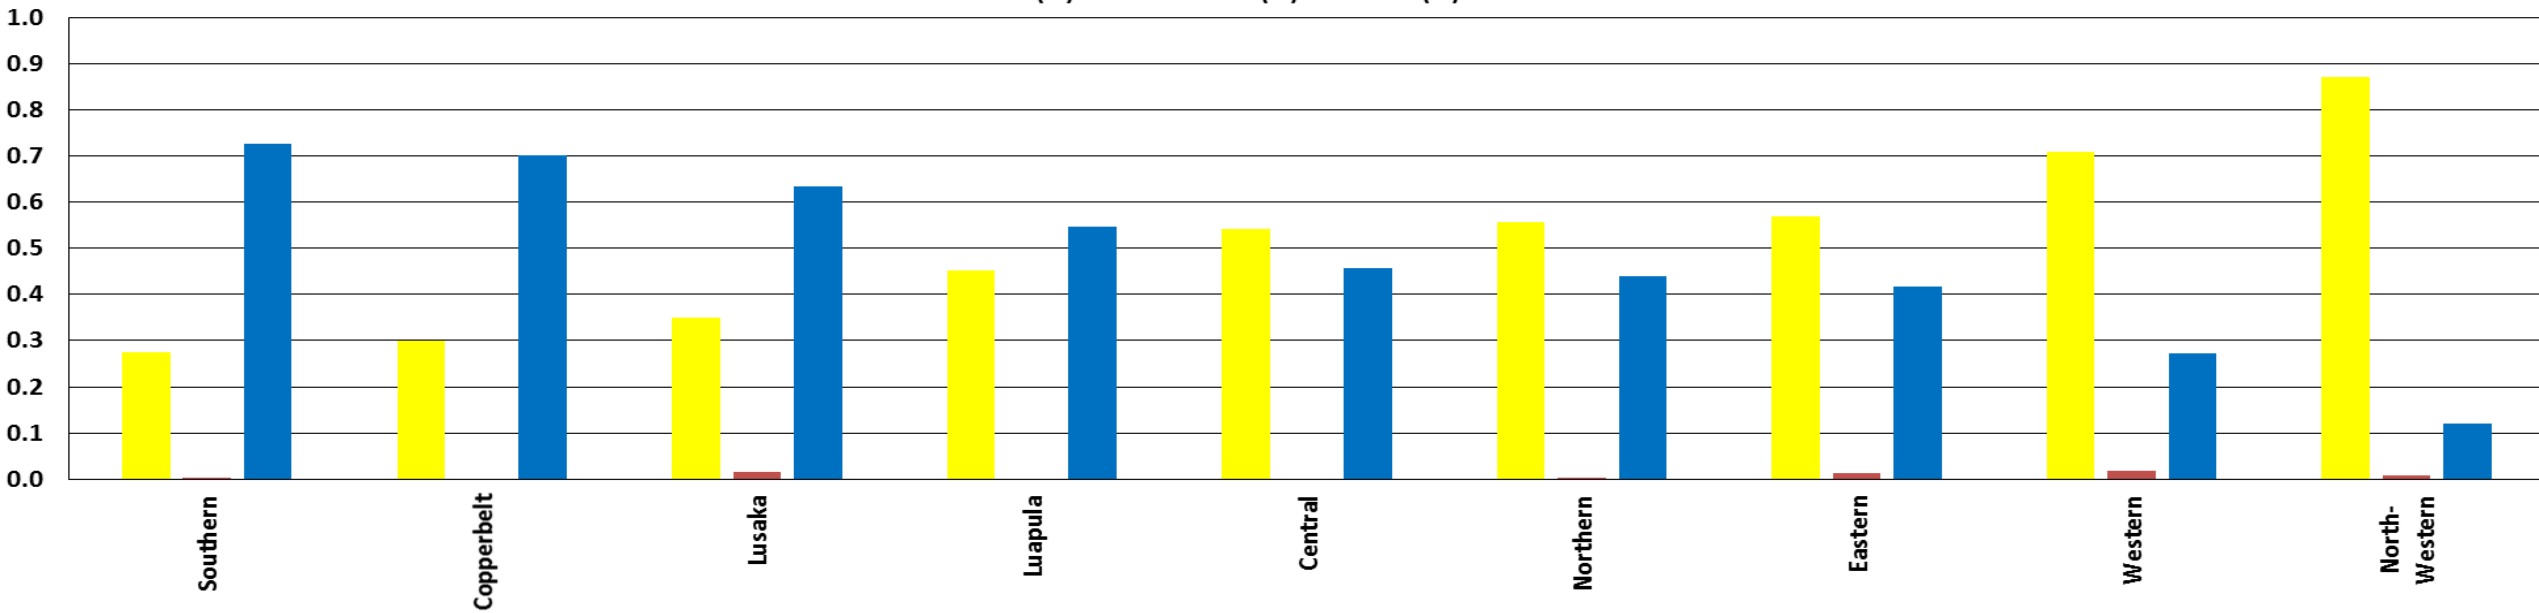

Share of electrification options in all Zambian regions

SHS (%) Mini-Grid (%) Grid (%)

GridBuilt-SHSDom

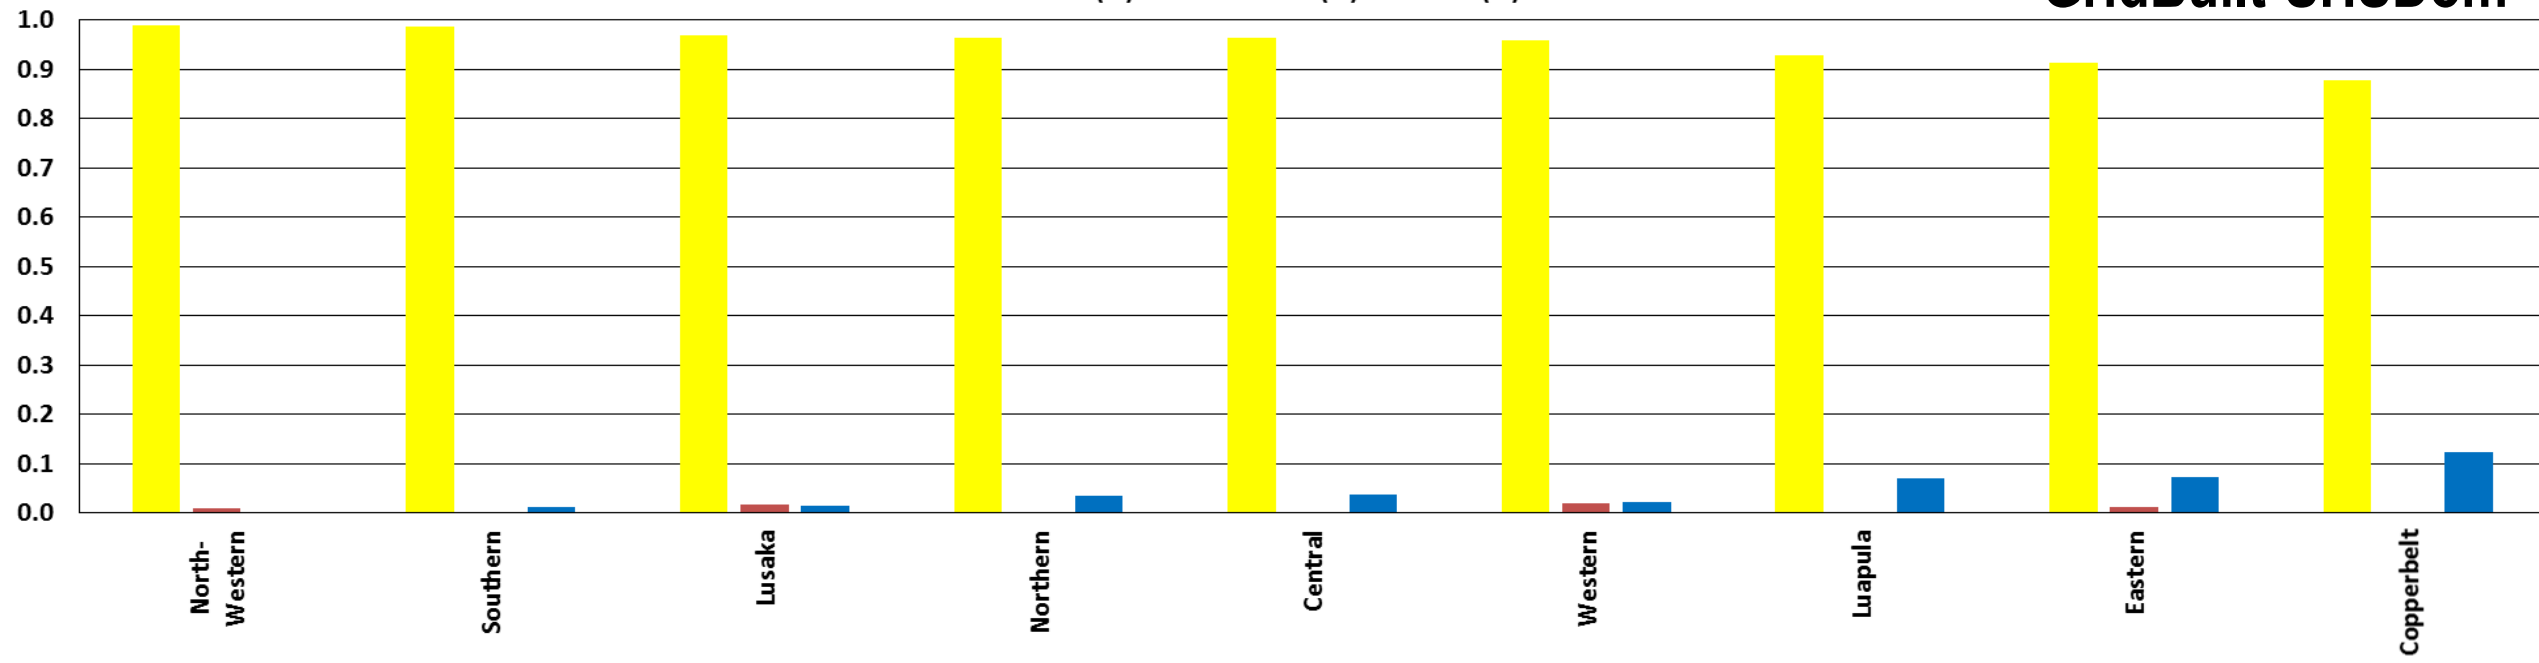

# Electrification option in all Zambian regions: GridPlanned-GridDom

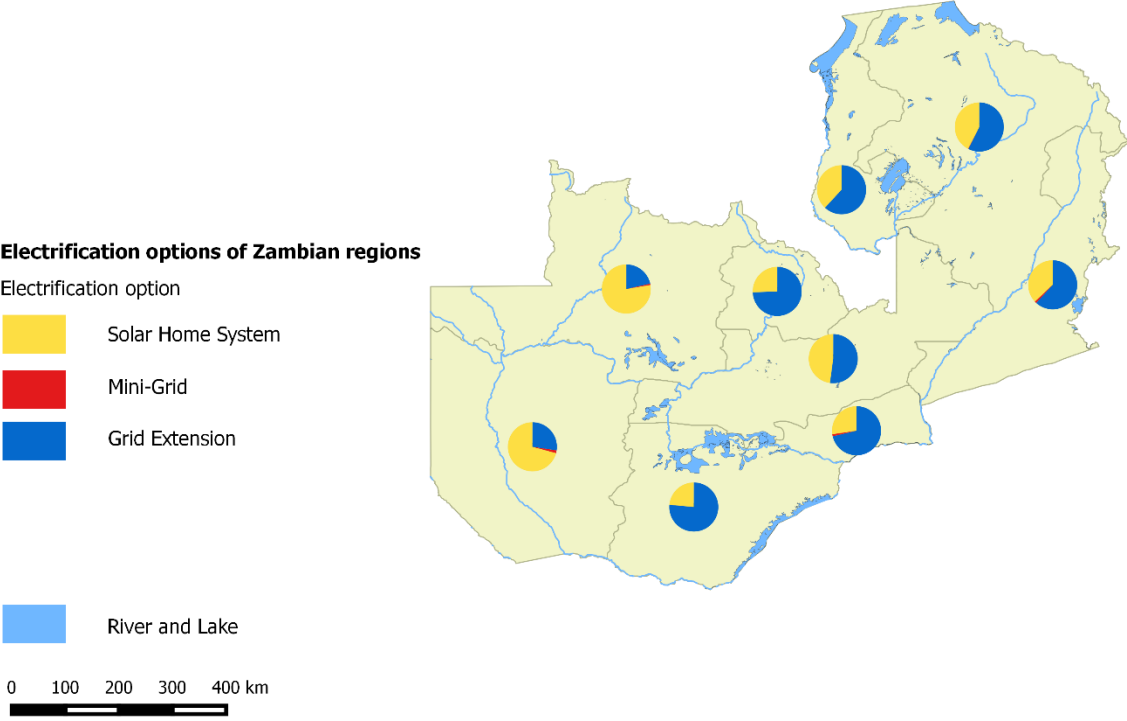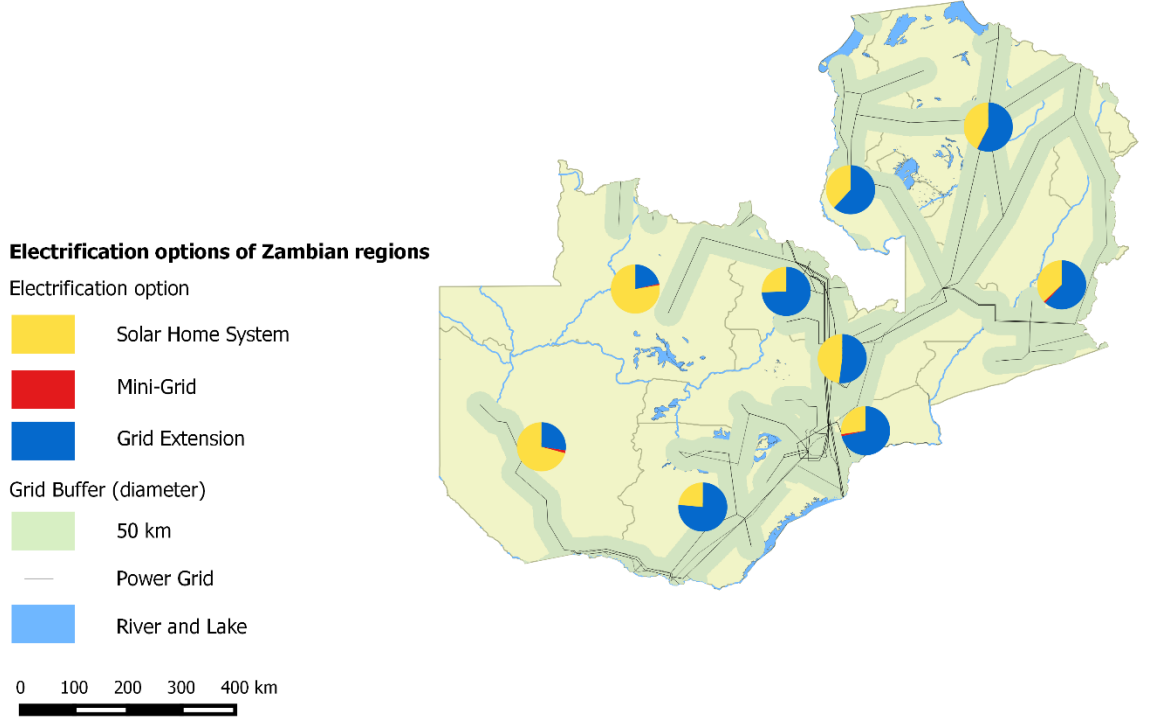

# Electrification option in all Zambian regions: GridPlanned-SHSDom

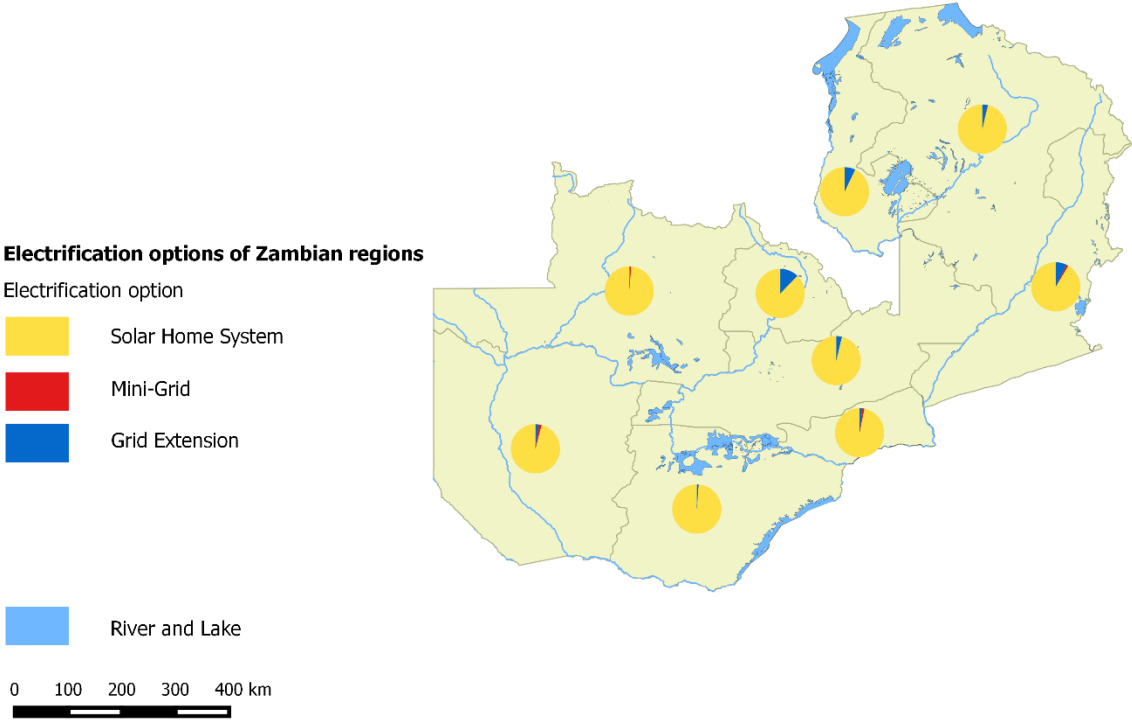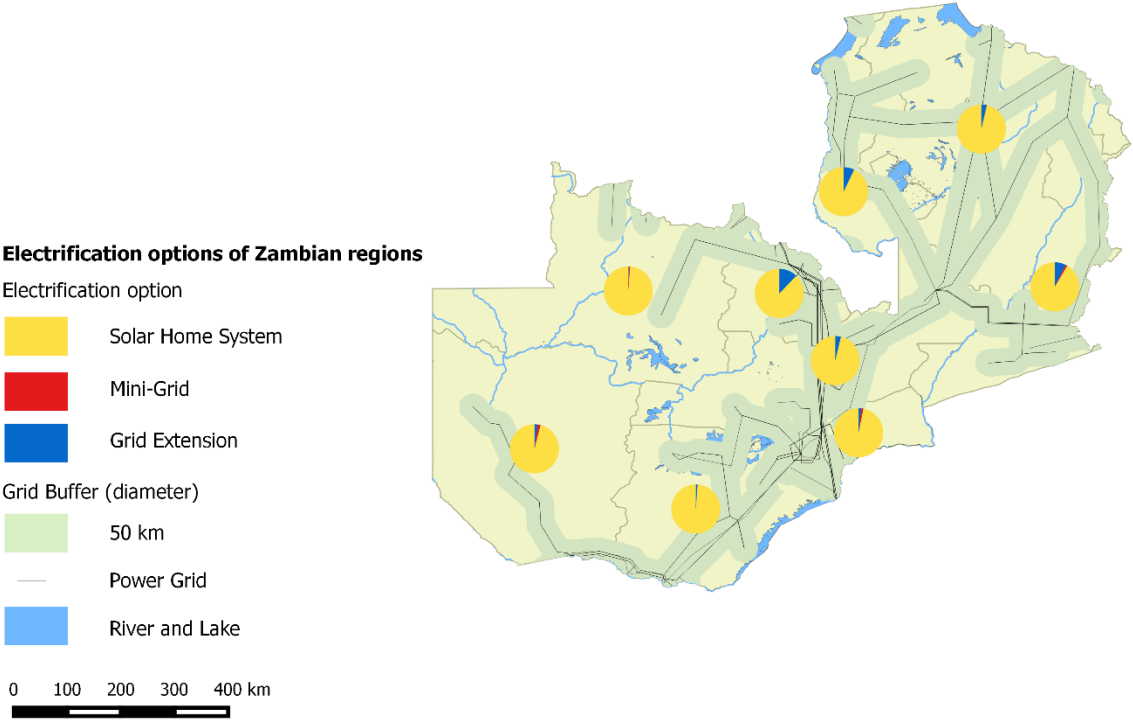

# Electrification option: GridPlanned-SHSDom

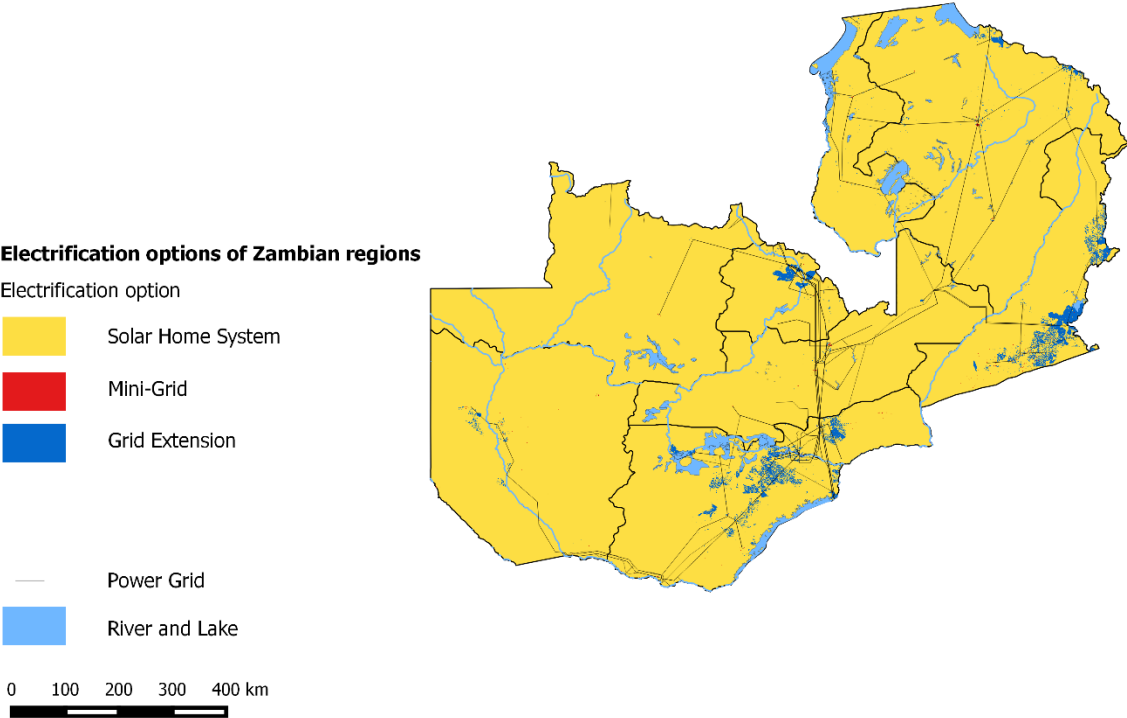

# Electrification option: GridPlanned-GridDom

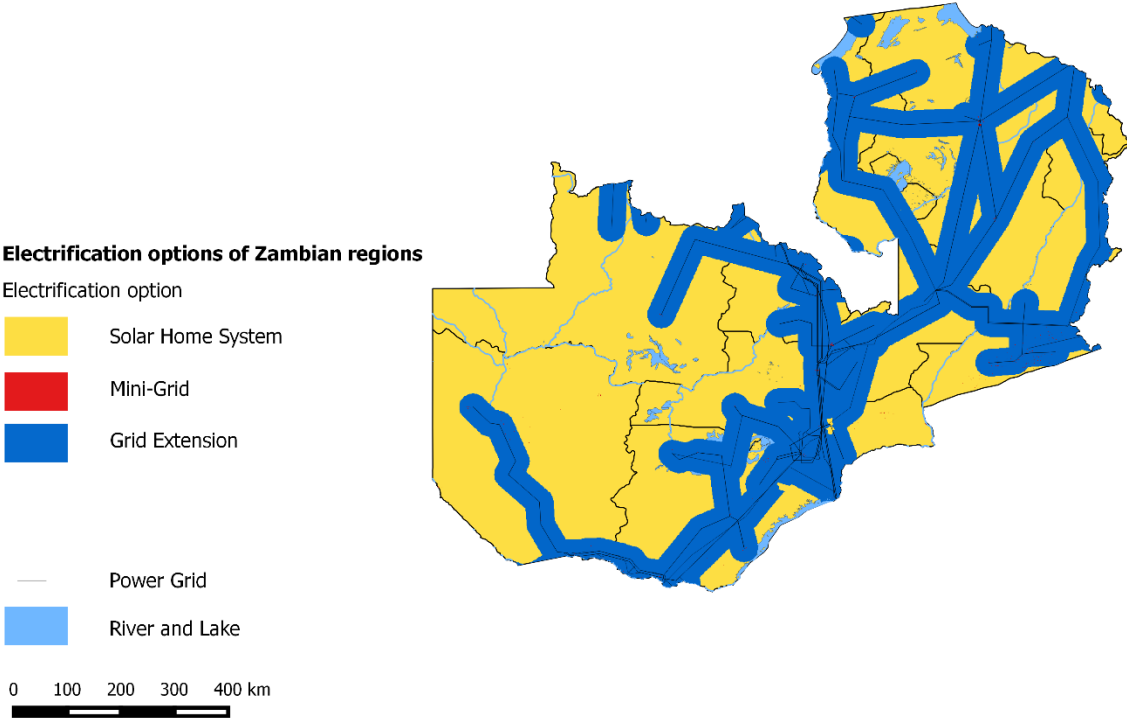

Share of electrification options in all Zambian regions

SHS (%) Mini-Grid (%) Grid (%)

GridPlanned-GridDom

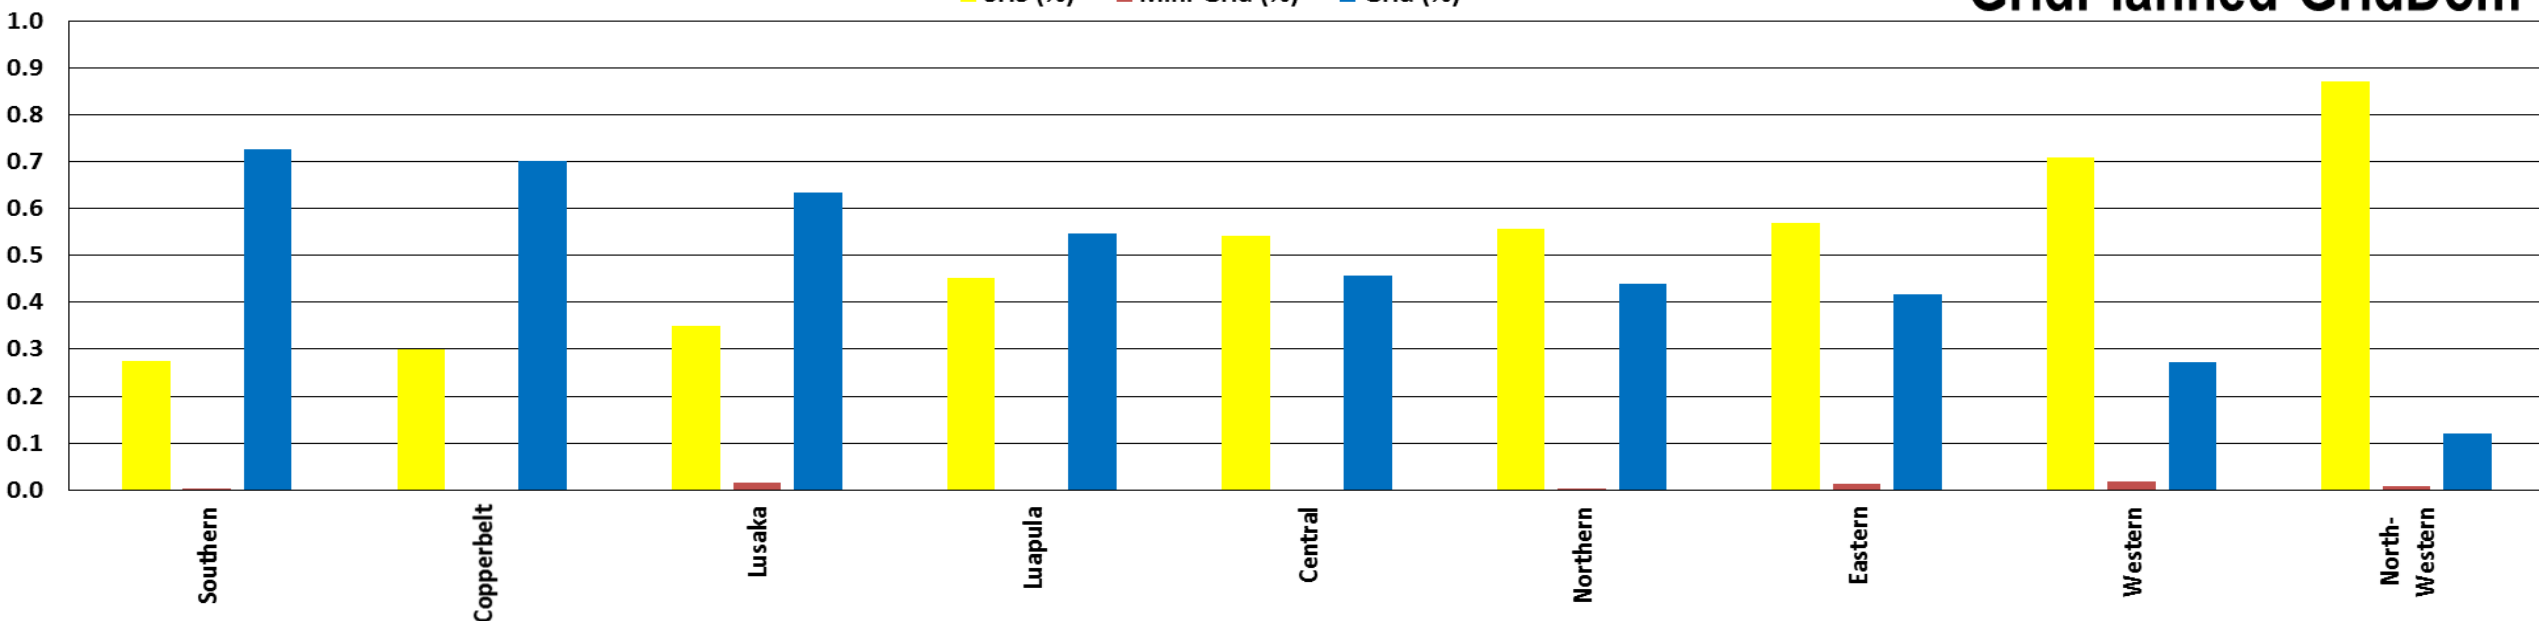

Share of electrification options in all Zambian regions

SHS (%) Mini-Grid (%) Grid (%)

GridPlanned-SHSDom

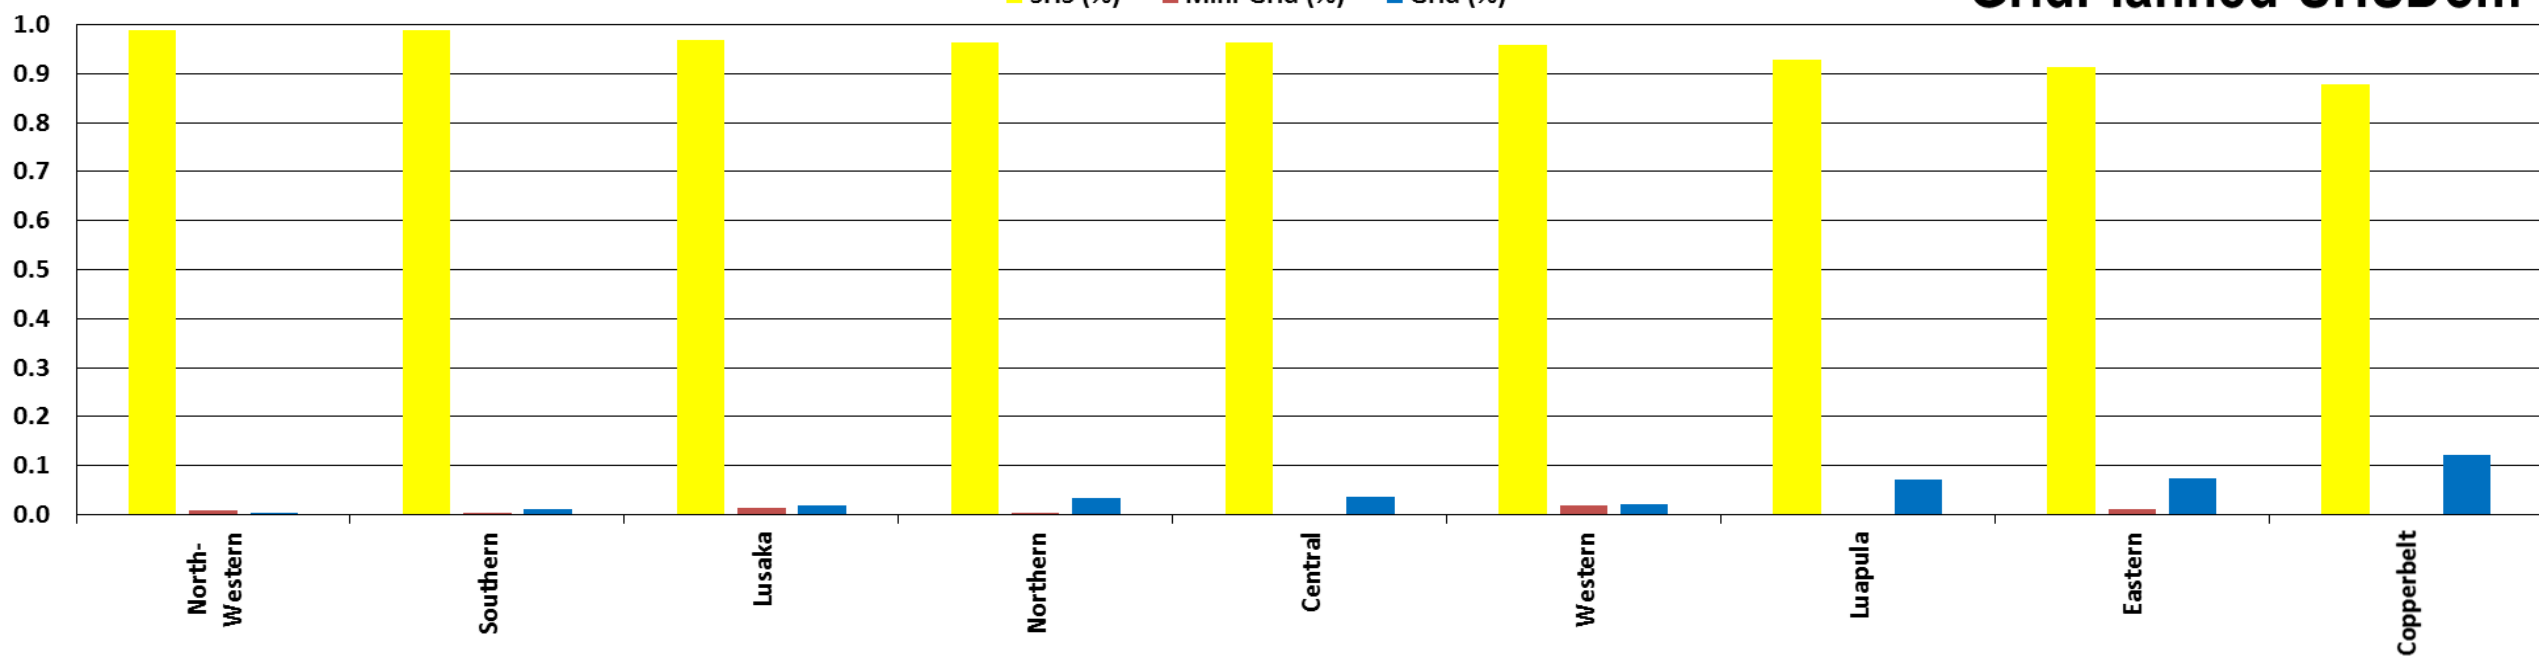

# Zimbabwe

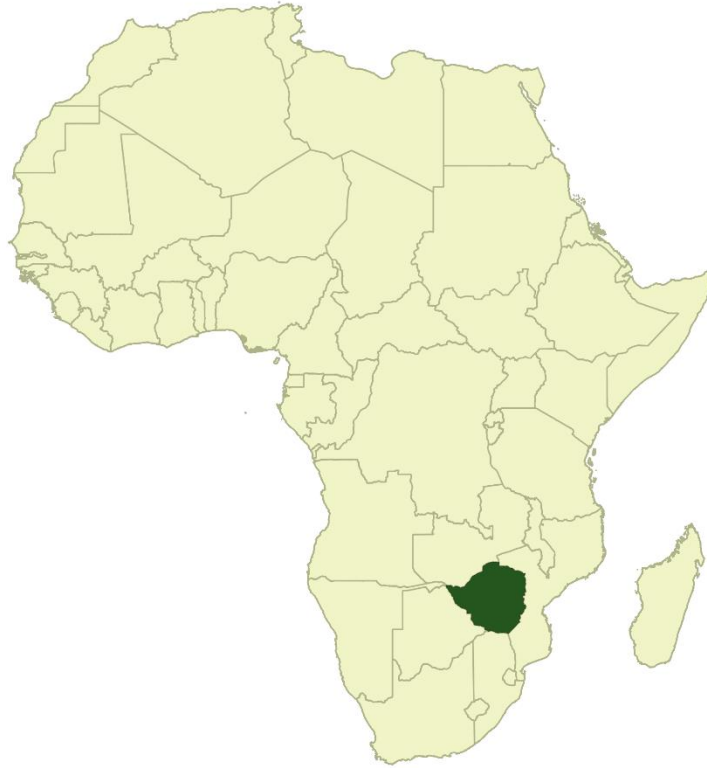

# Night light emission and Population of Zimbabwean regions

Night light emission in Zimbabwe

Detected night lights

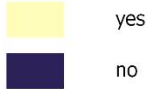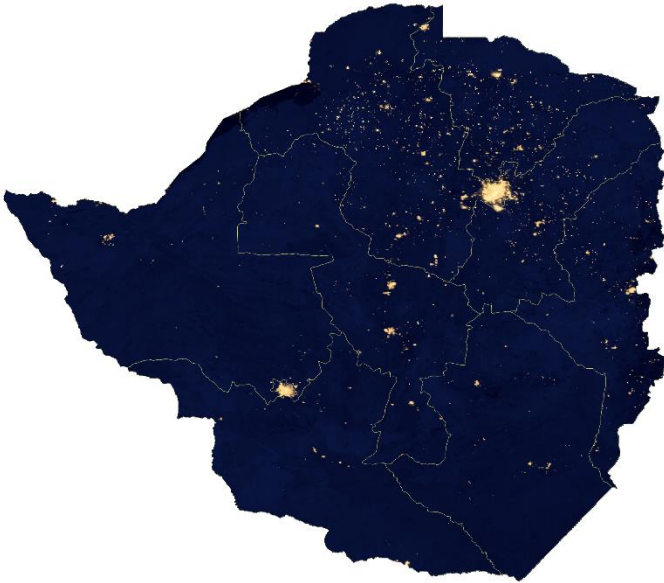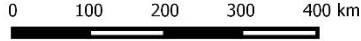

Population structure of Zimbabwe

Population density (people/750x750m<sup>2</sup>)

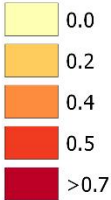

River and Lake

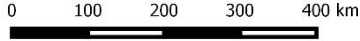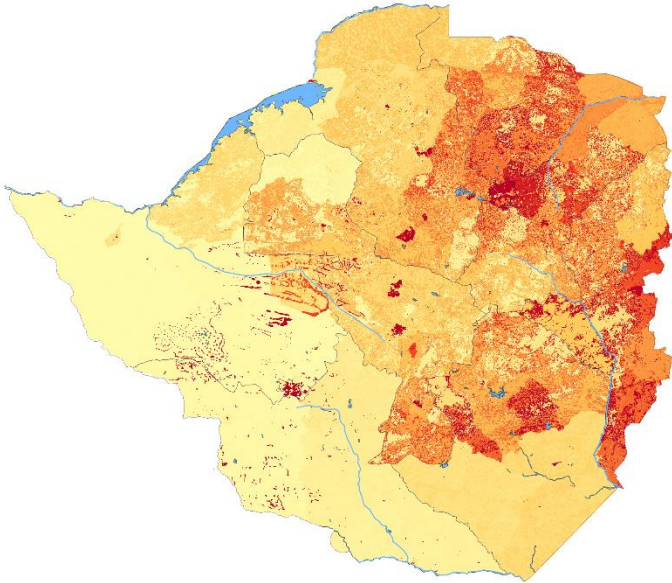

# Electrification option in all Zimbabwean regions: GridBuilt-GridDom

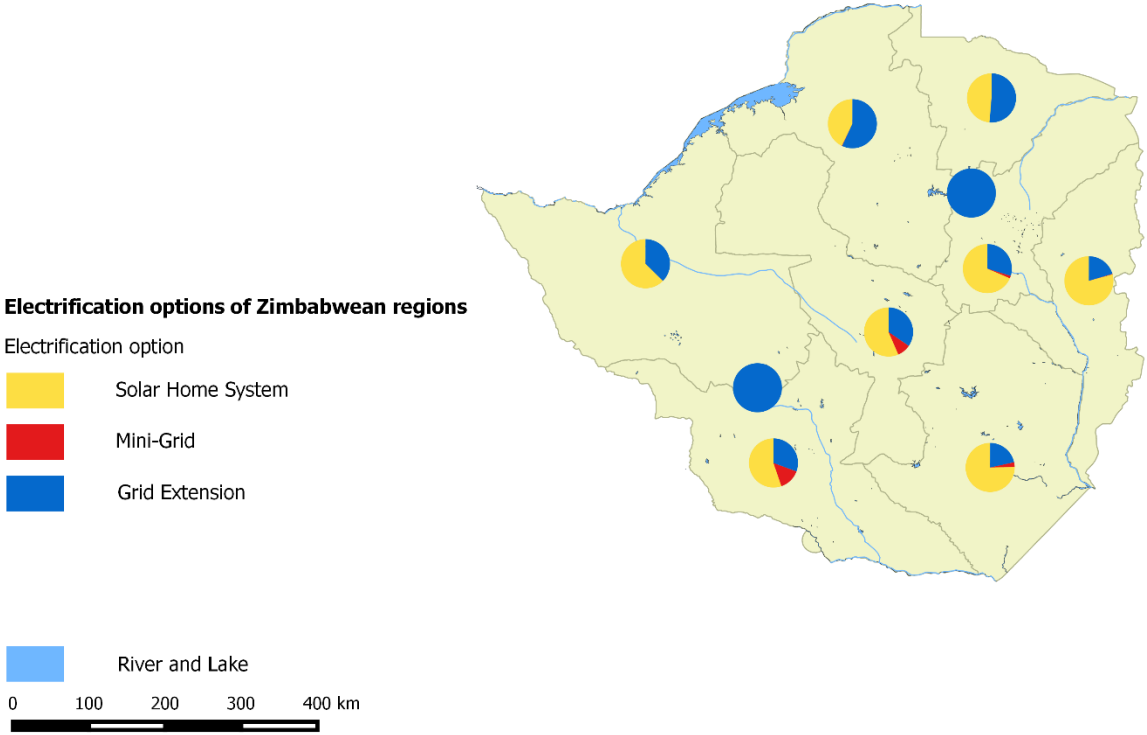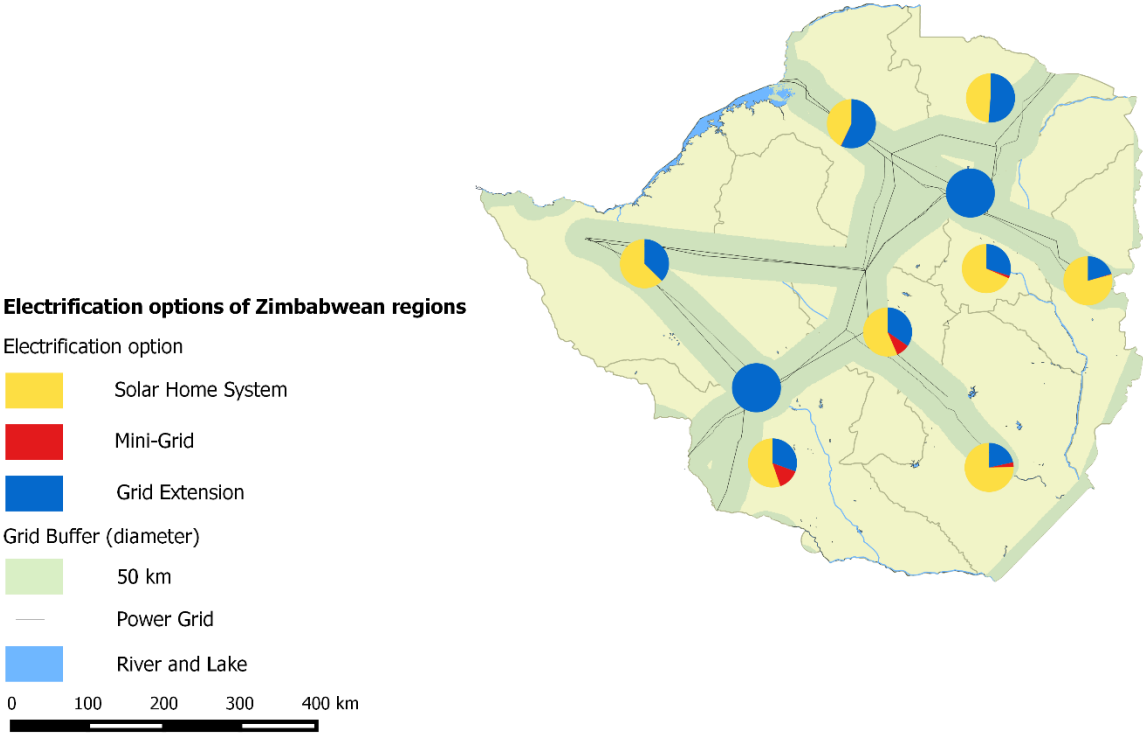

# Electrification option in all Zimbabwean regions: GridBuilt-SHSDom

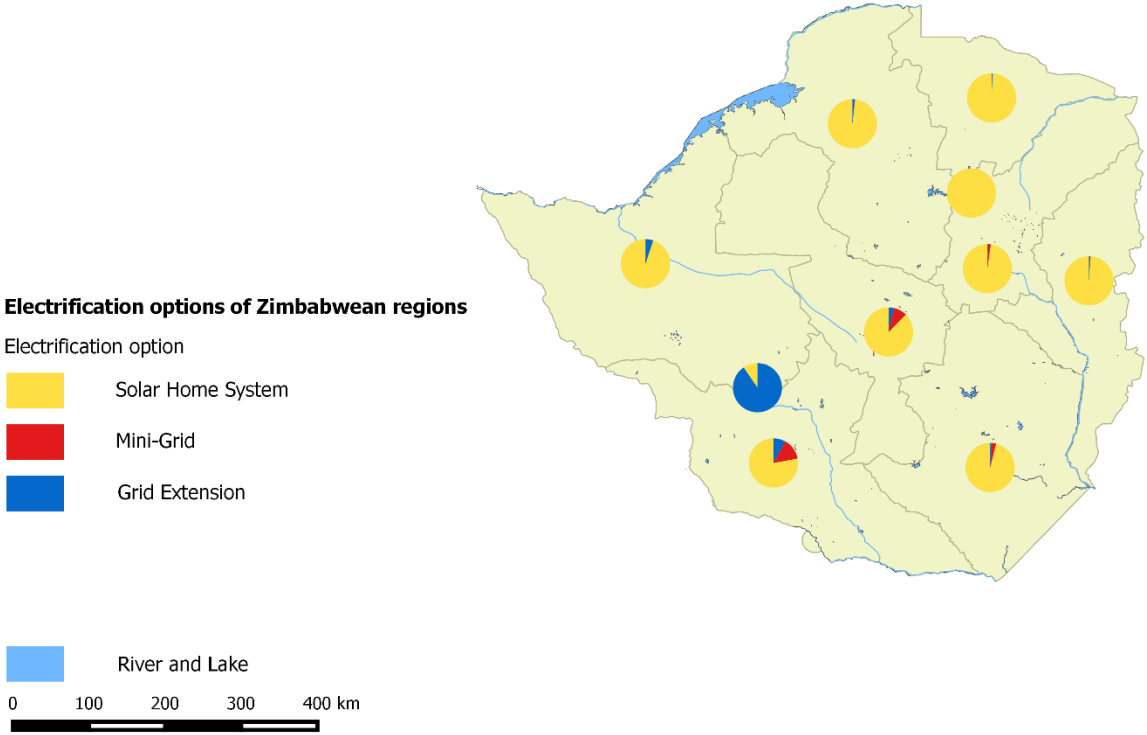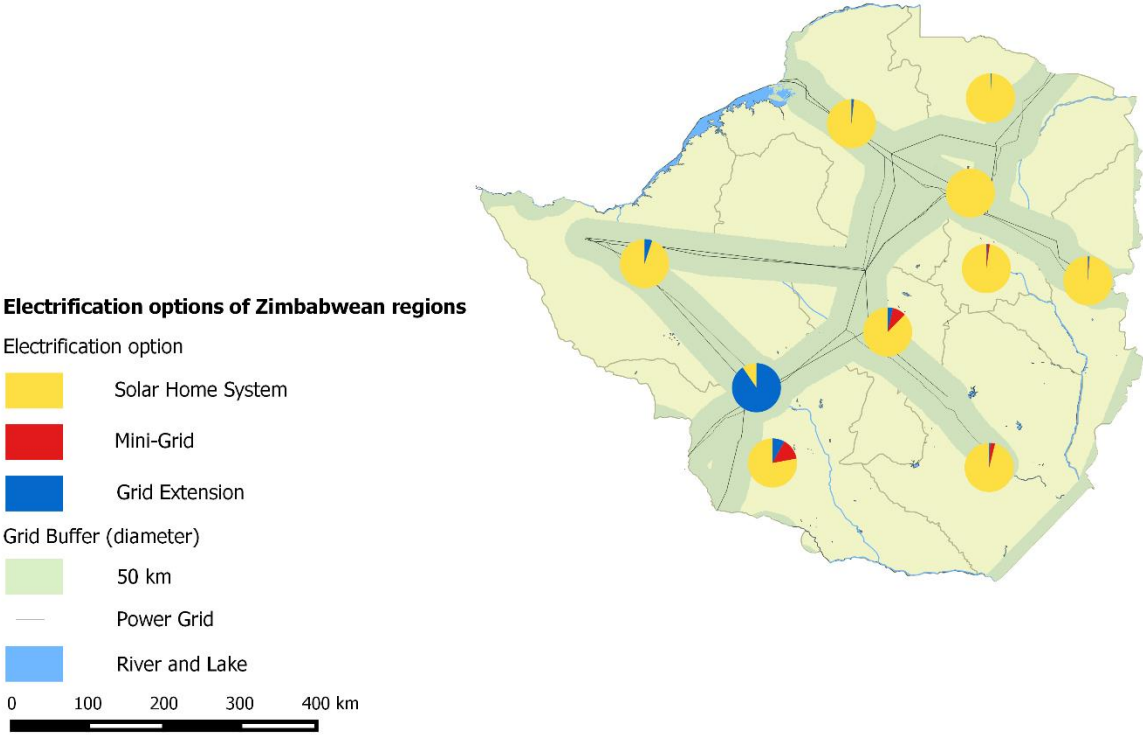

# Electrification option: GridBuilt-SHSDom

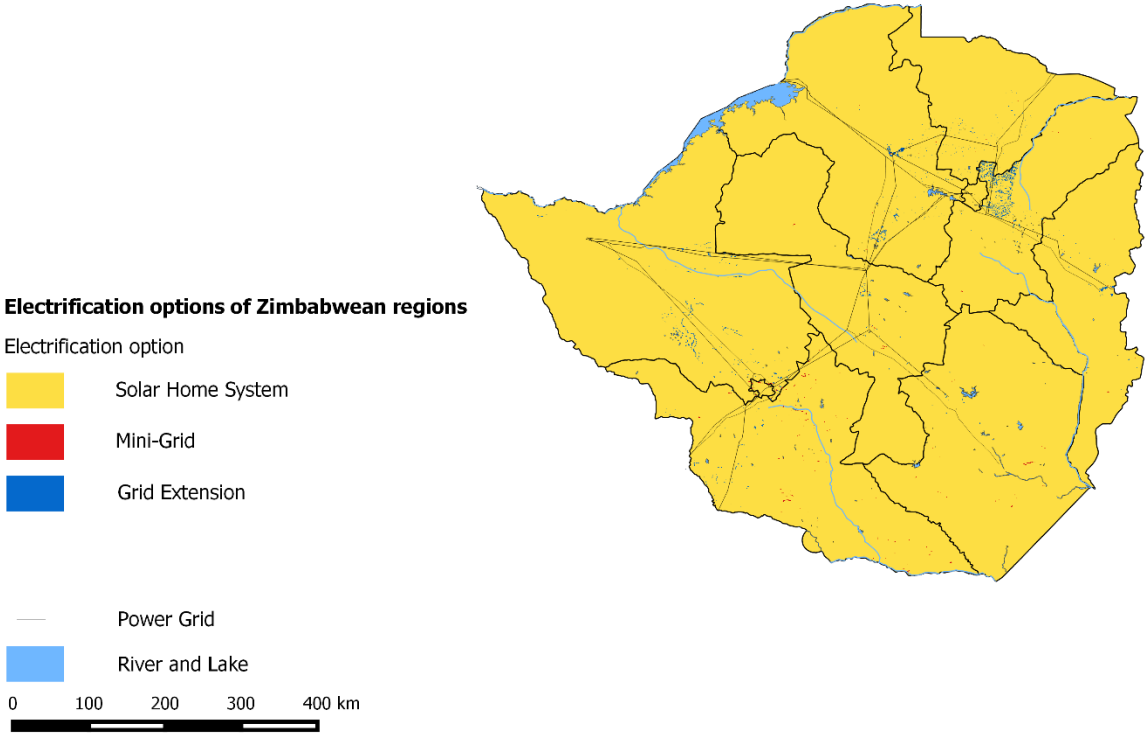

# Electrification option: GridBuilt-GridDom

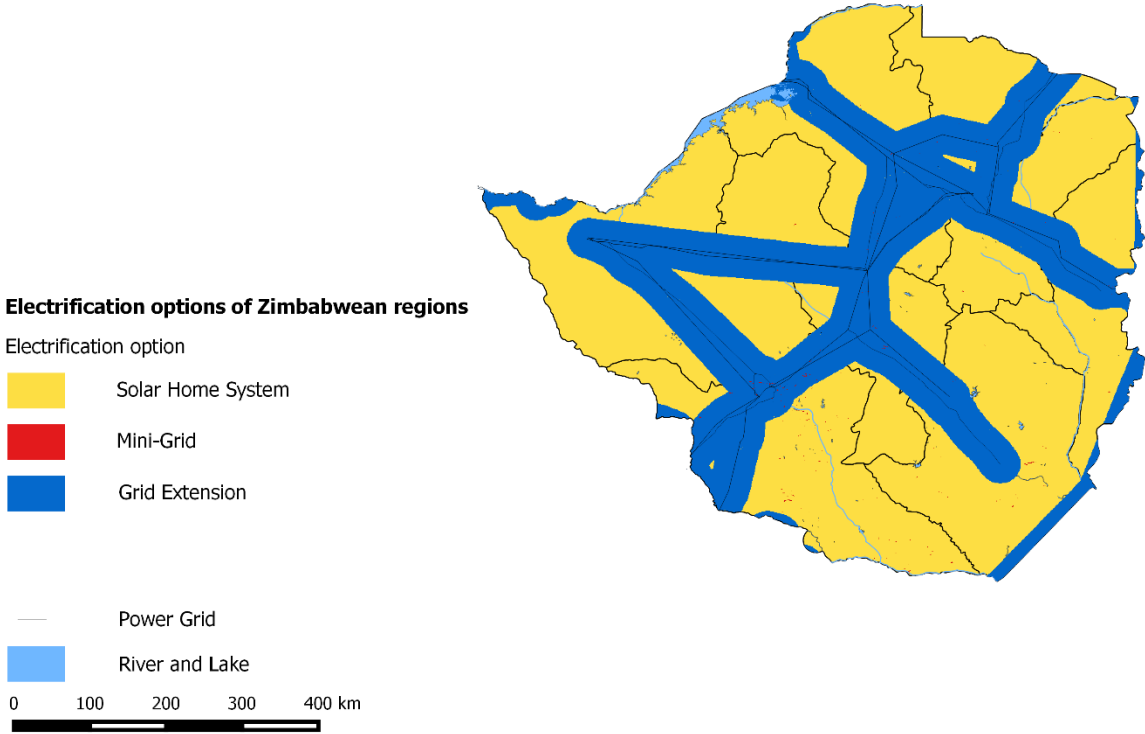

Share of all electrification options in all Zimbabwean regions

GridBuilt-GridDom

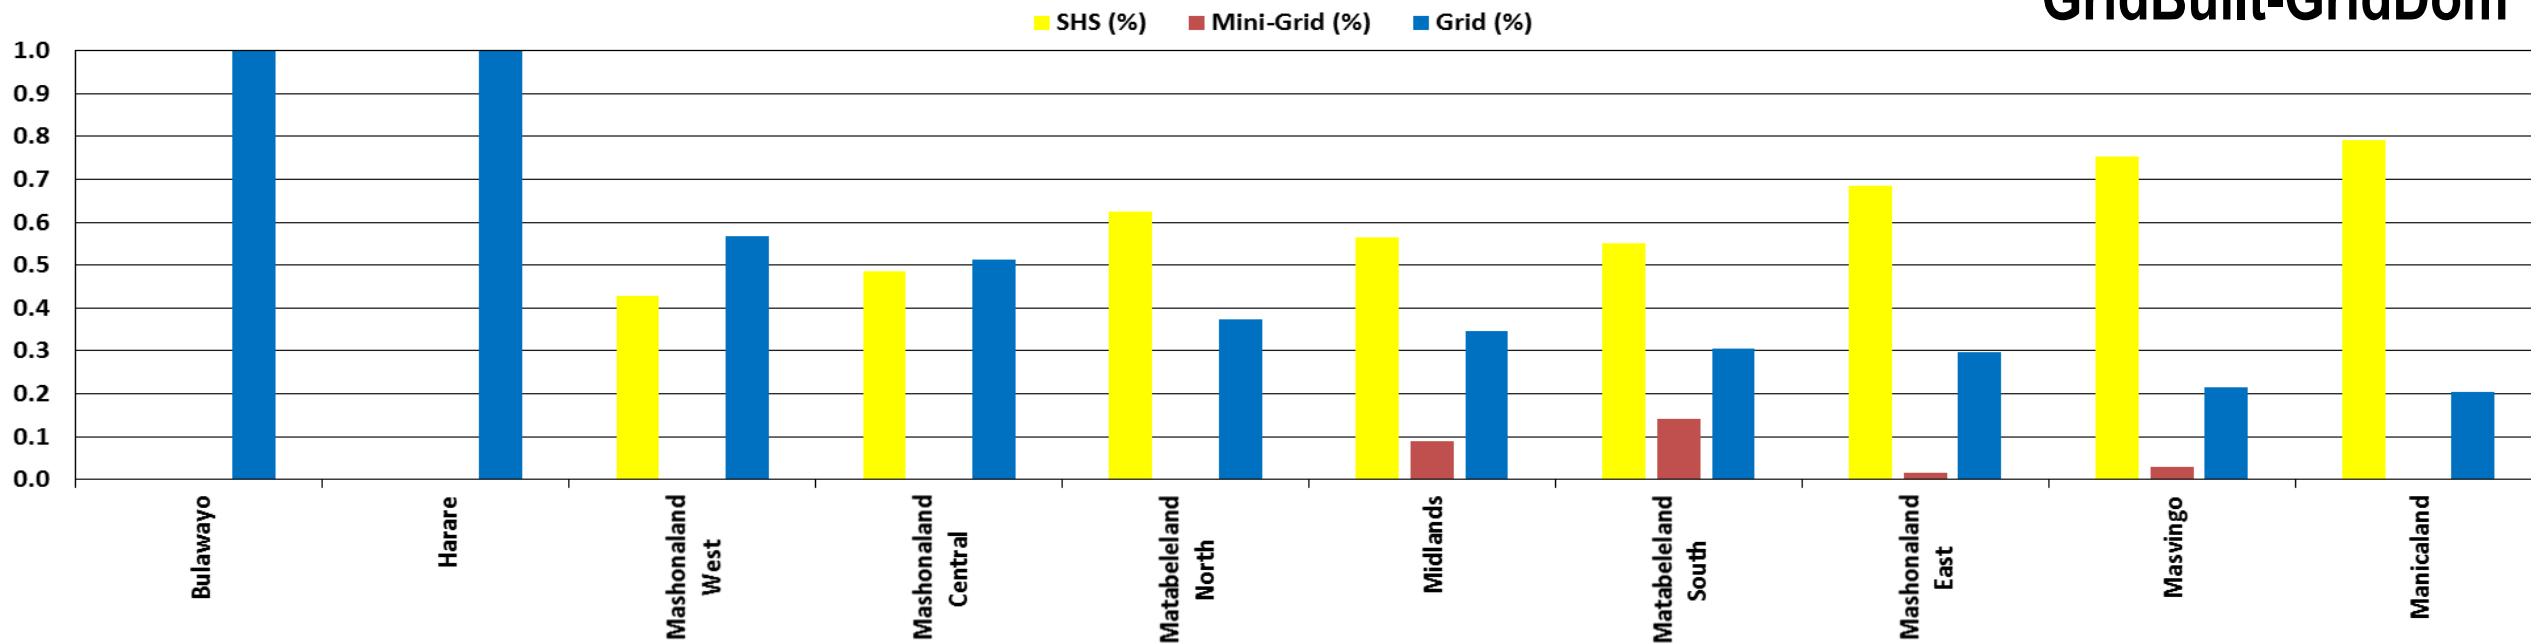

Share of all electrification options in all Zimbabwean regions

GridBuilt-SHSDom

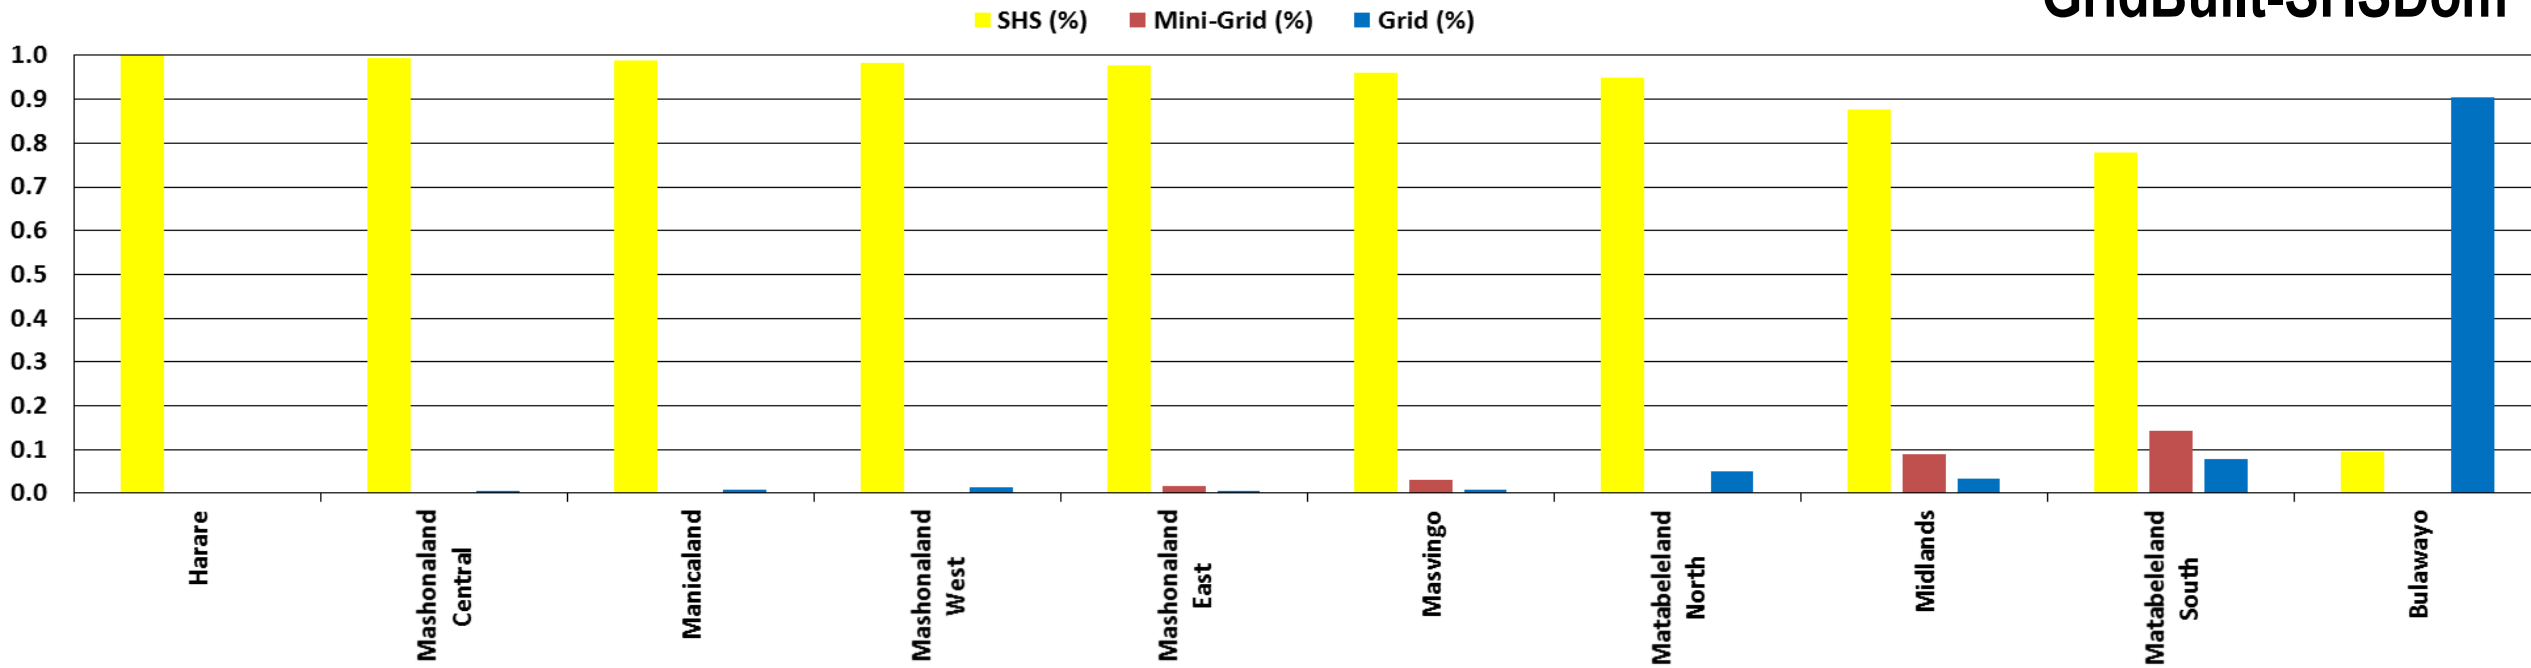

# Electrification option in all Zimbabwean regions: GridPlanned-GridDom

## Electrification options of Zimbabwean regions

Electrification option

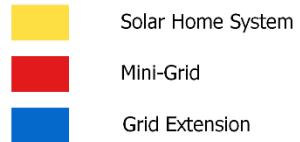

River and Lake

0 100 200 300 400 km

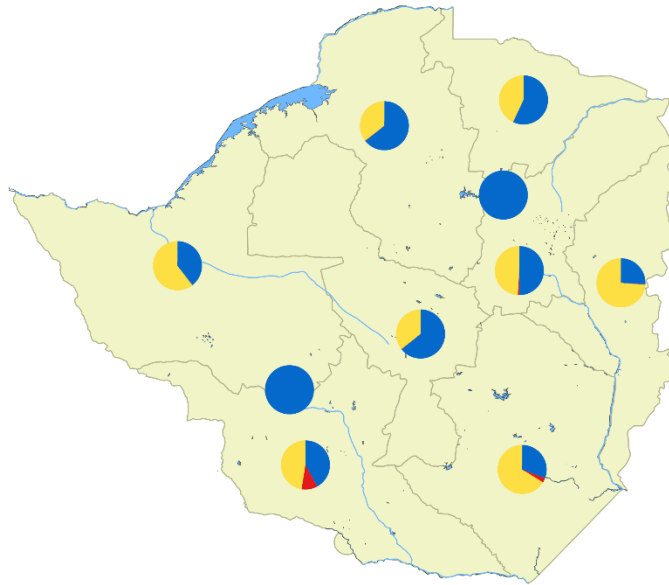

## Electrification options of Zimbabwean regions

Electrification option

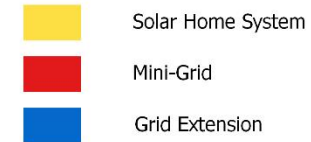

Grid Buffer (diameter)

50 km

Power Grid

River and Lake

0 100 200 300 400 km

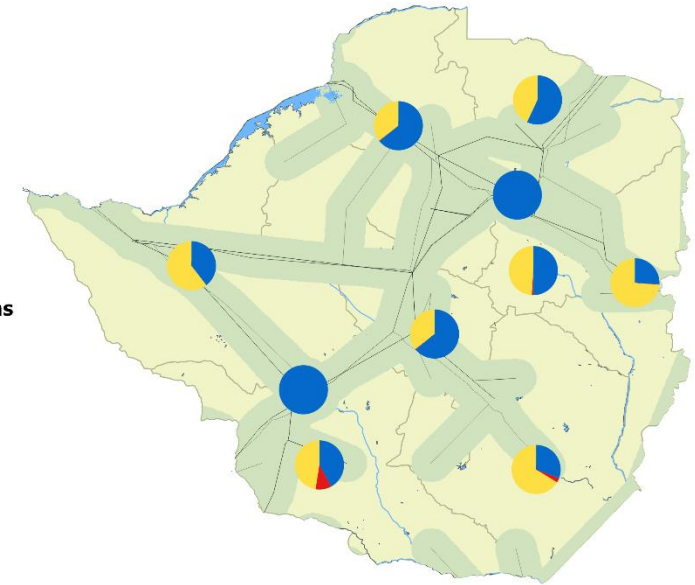

# Electrification option in all Zimbabwean regions: GridPlanned-SHSDom

## Electrification options of Zimbabwean regions

Electrification option

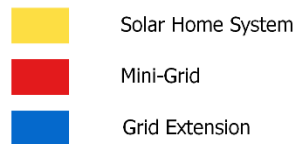

River and Lake

0 100 200 300 400 km

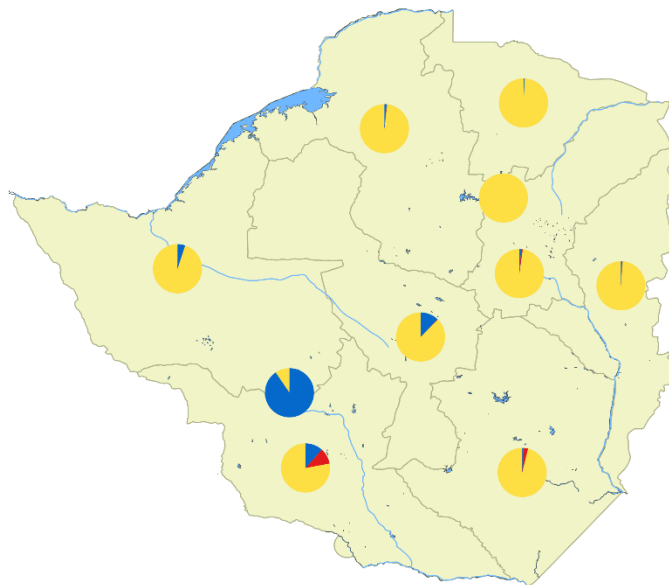

## Electrification options of Zimbabwean regions

Electrification option

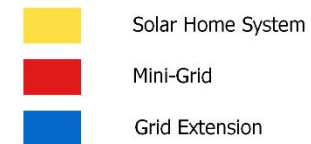

Grid Buffer (diameter)

50 km

Power Grid

River and Lake

0 100 200 300 400 km

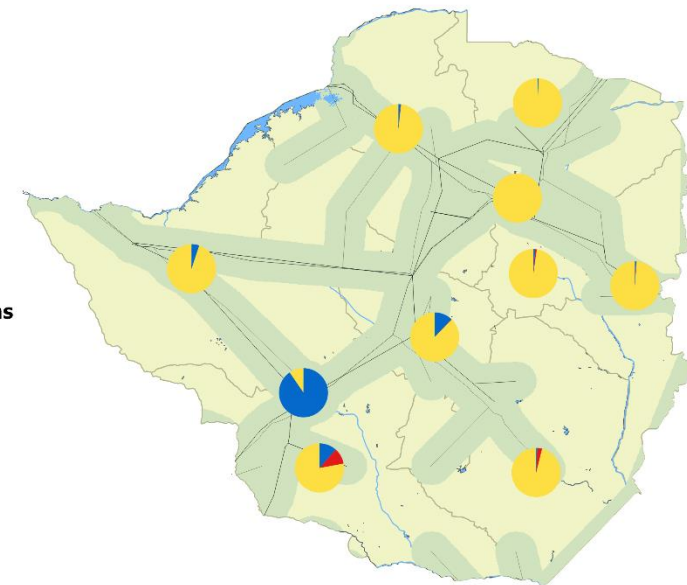

# Electrification option: GridPlanned-SHSDom

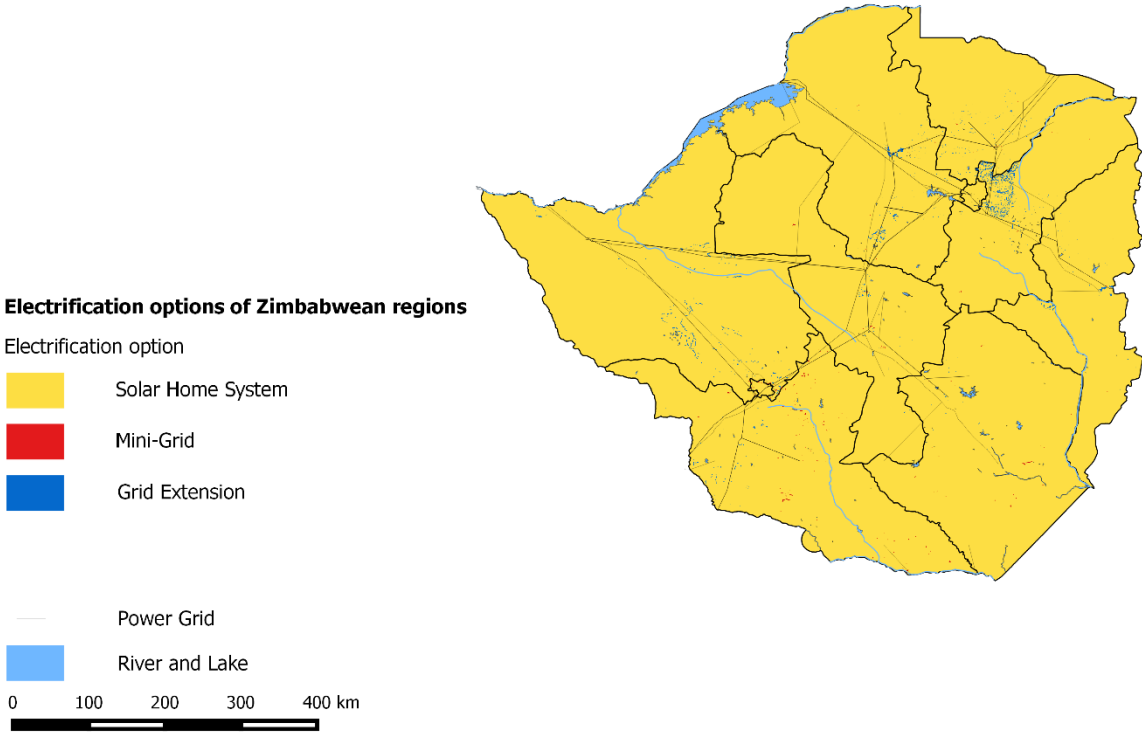

# Electrification option: GridPlanned-GridDom

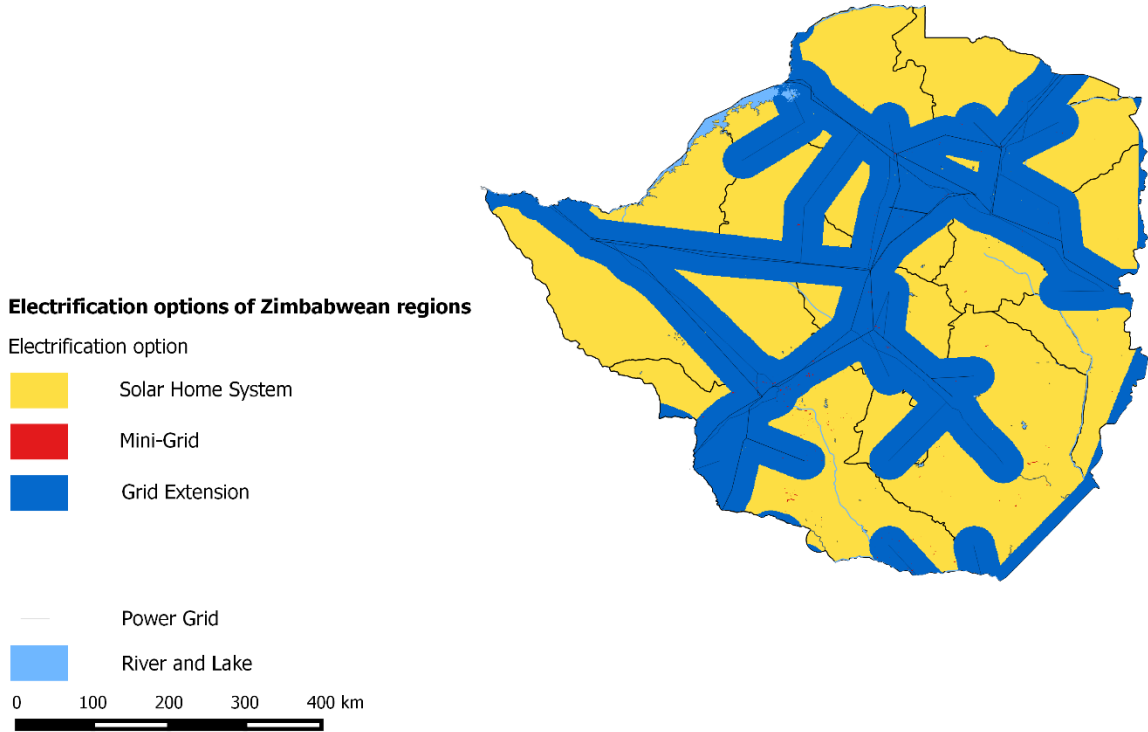

Share of all electrification options in all Zimbabwean regions

SHS (%) Mini-Grid (%) Grid (%)

GridPlanned-GridDom

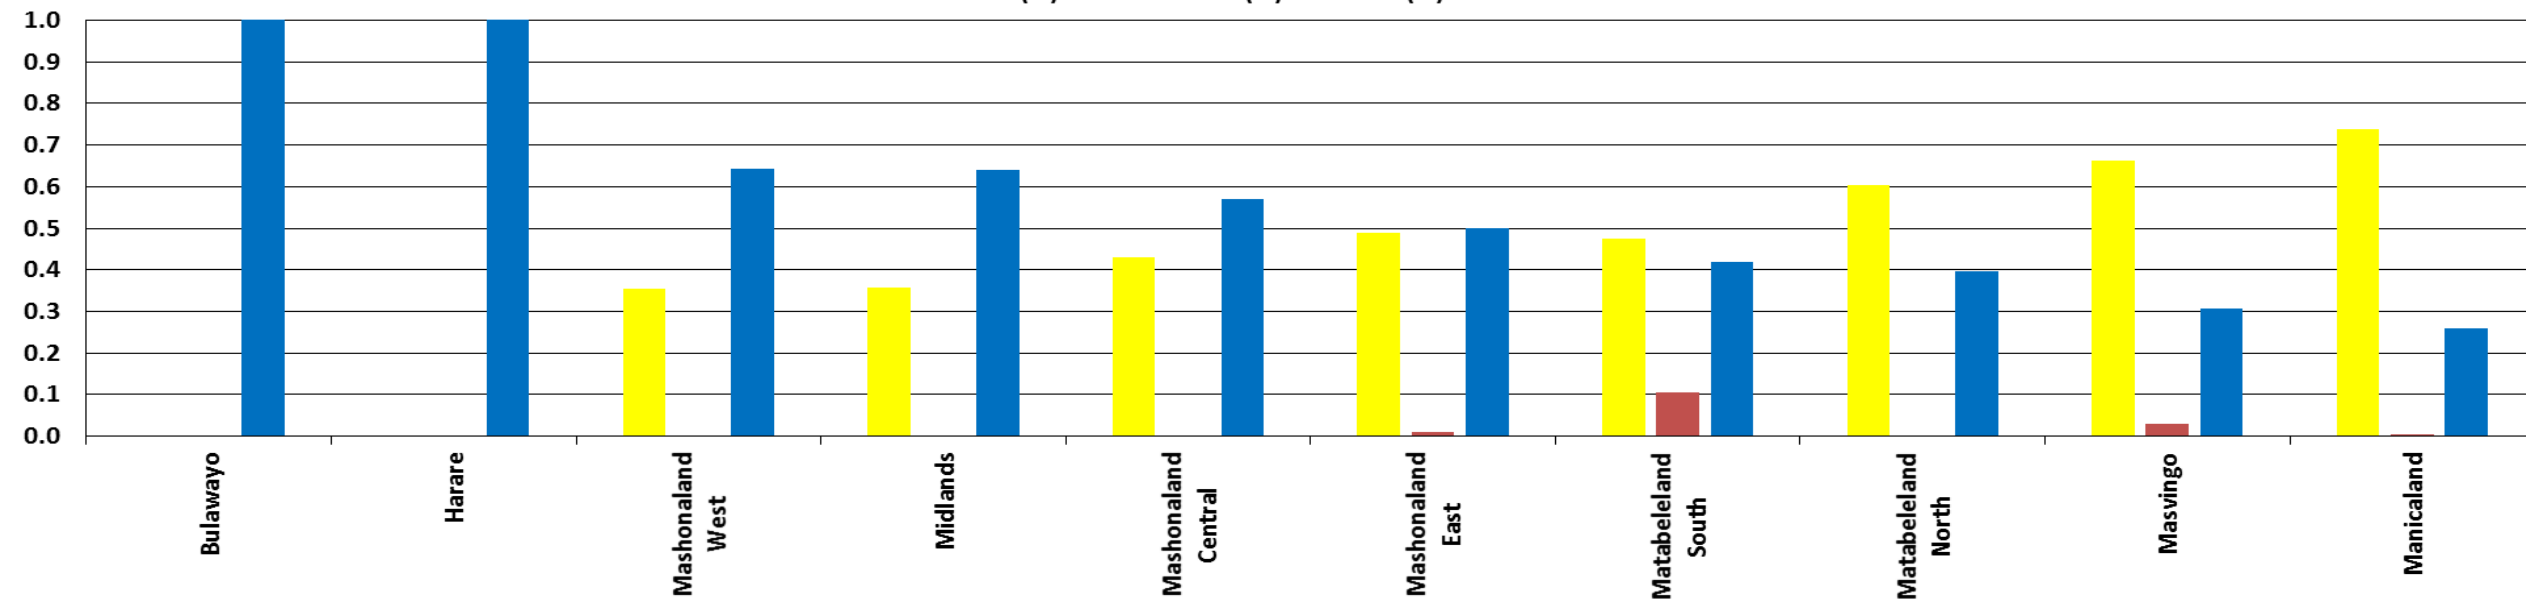

Share of all electrification options in all Zimbabwean regions

SHS (%) Mini-Grid (%) Grid (%)

GridPlanned-SHSDom

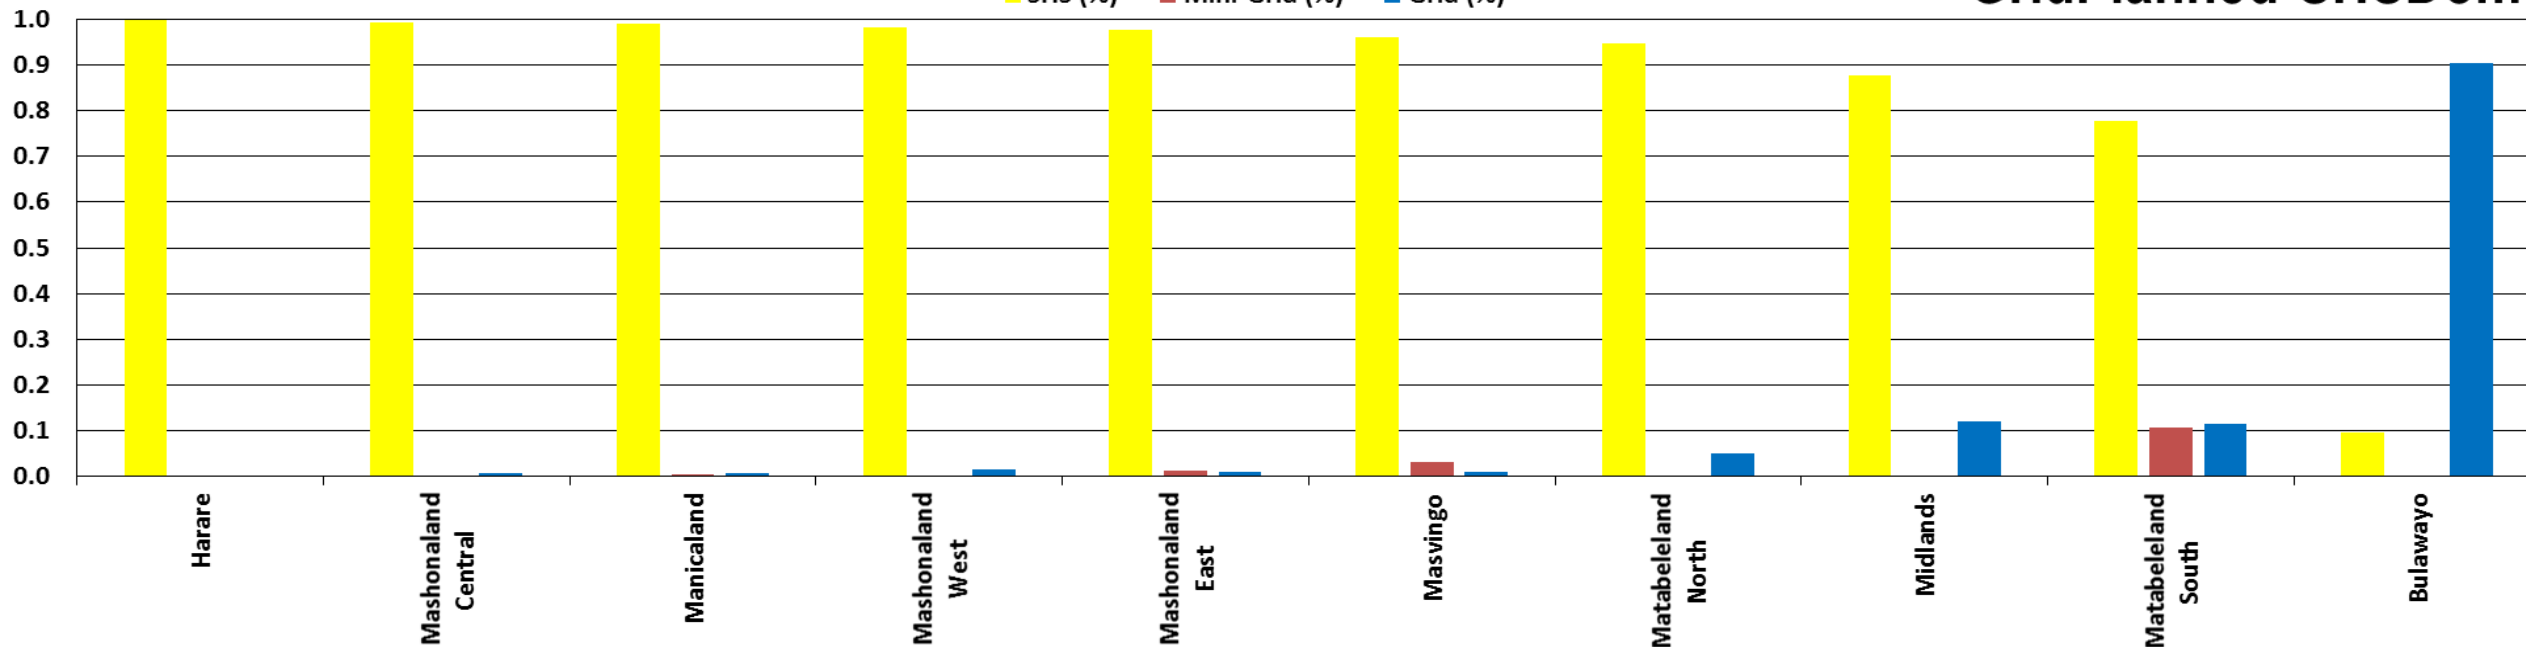

Supplement: s1 [file s1]
