# Supplementary material
Source: MDPI journal article supplement (https://www.mdpi.com/1996-1073/10/11/1899)

# South Africa

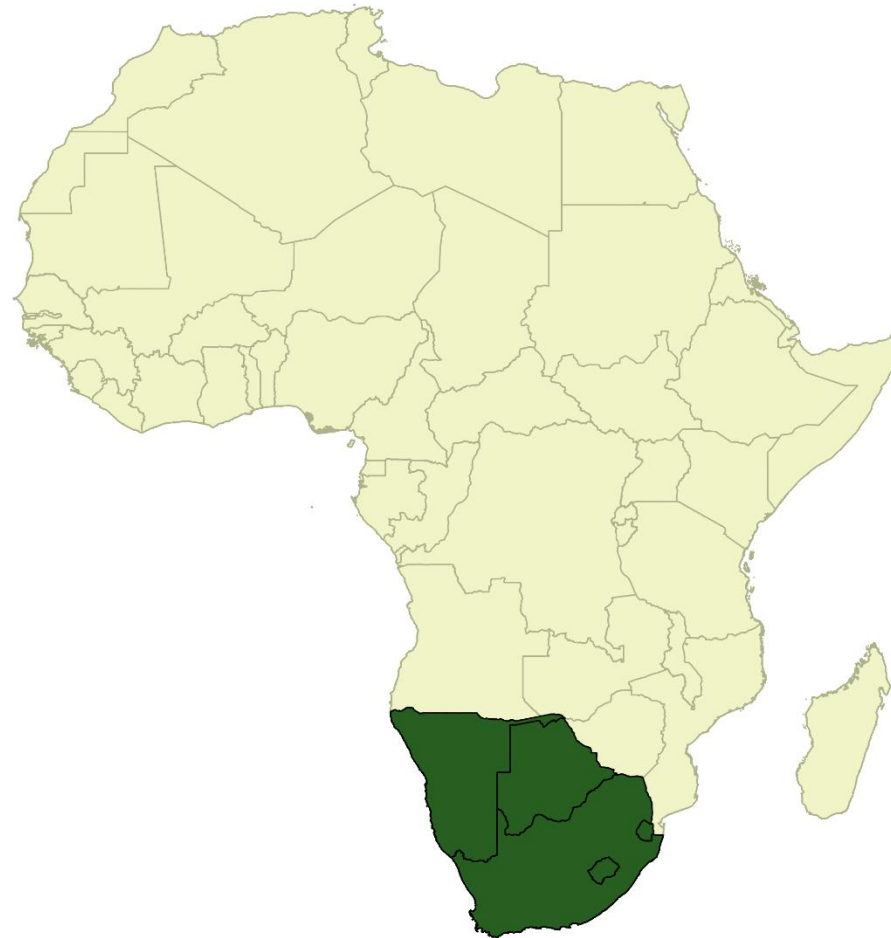

# Botswana

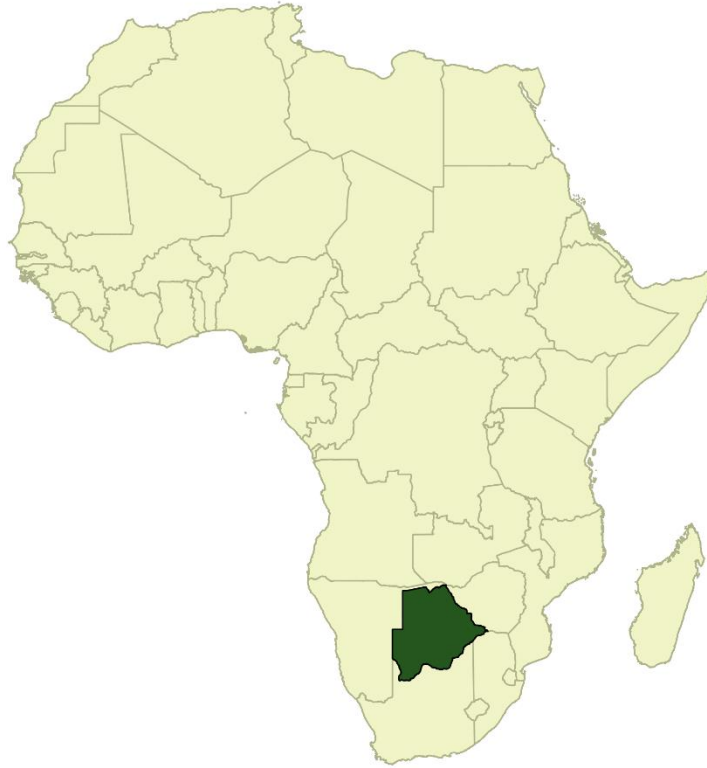

# Night light emission and Population of Botswanan regions

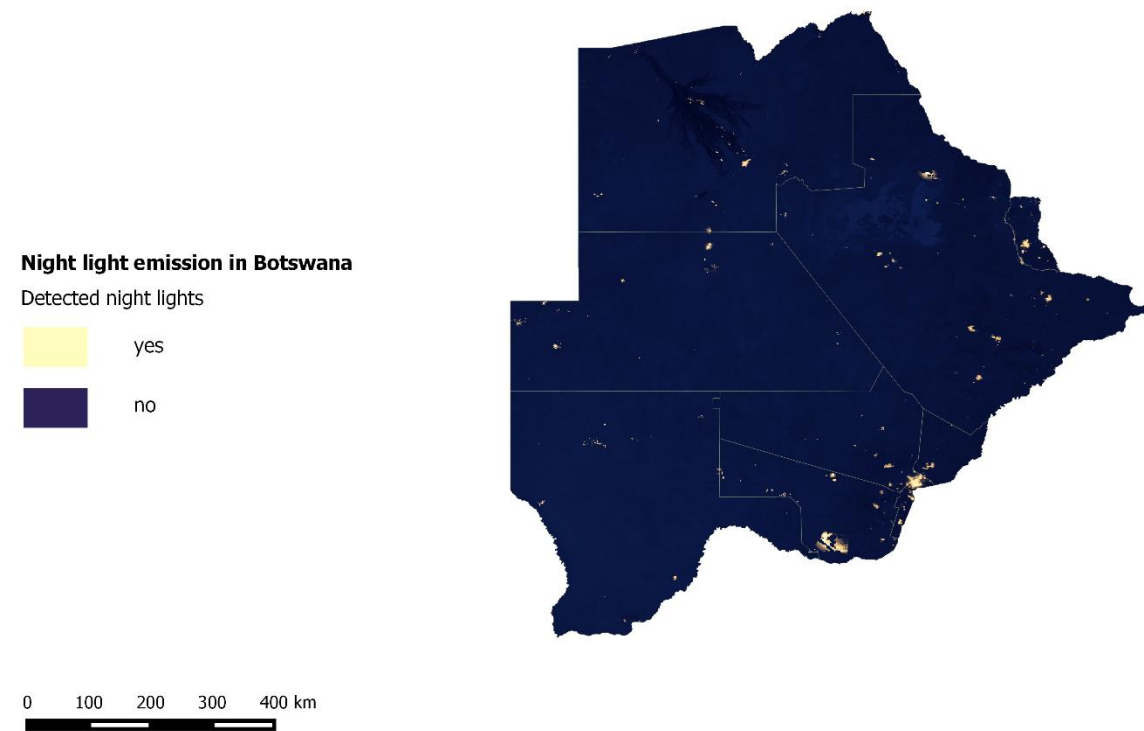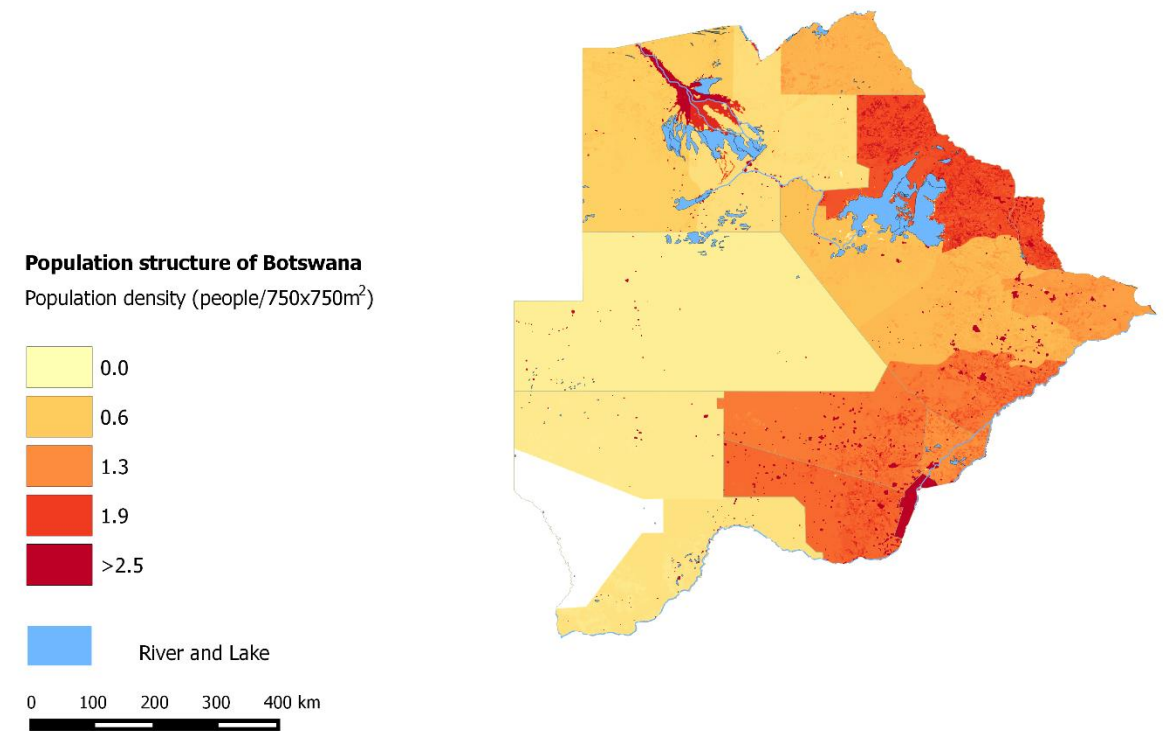

# Electrification option in all Botswanan regions: GridBuilt-GridDom

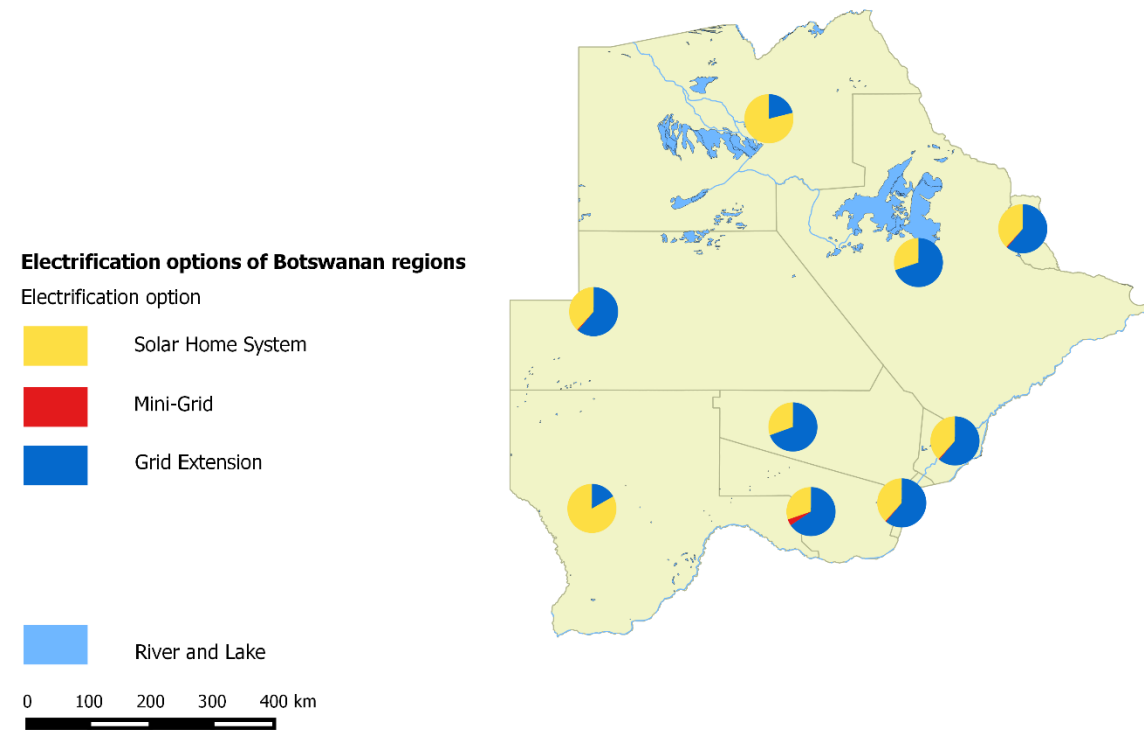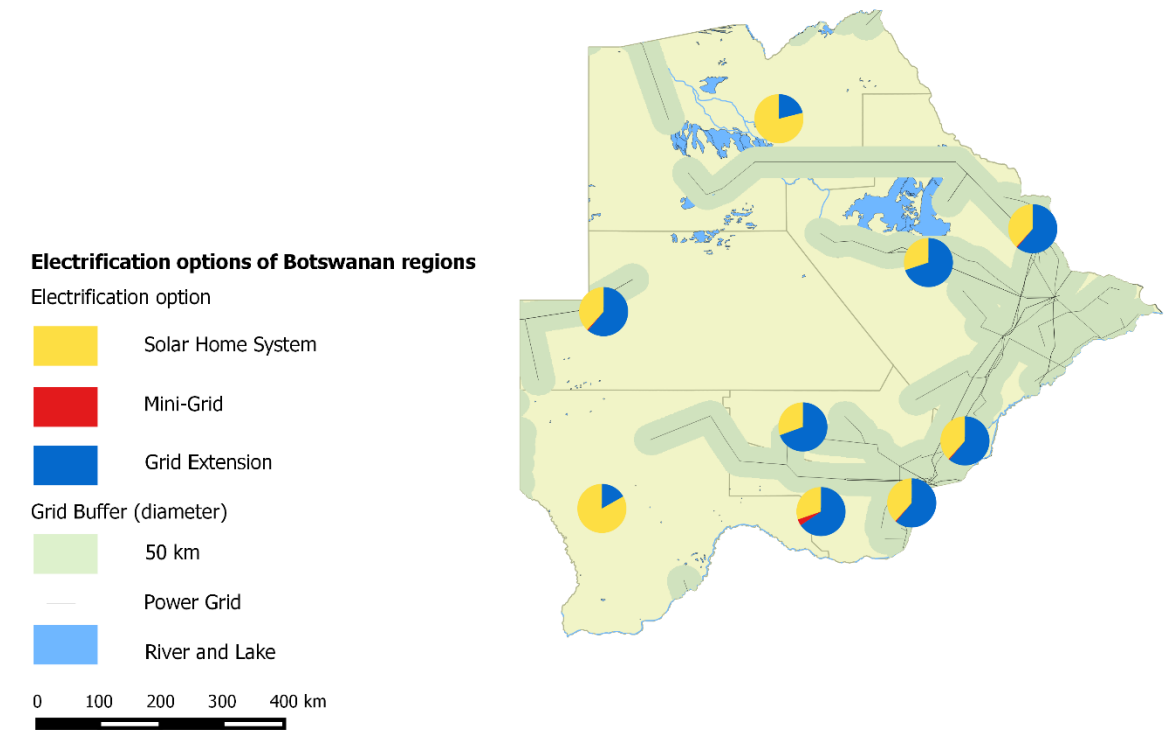

# Electrification option in all Botswanan regions: GridBuilt-SHSDom

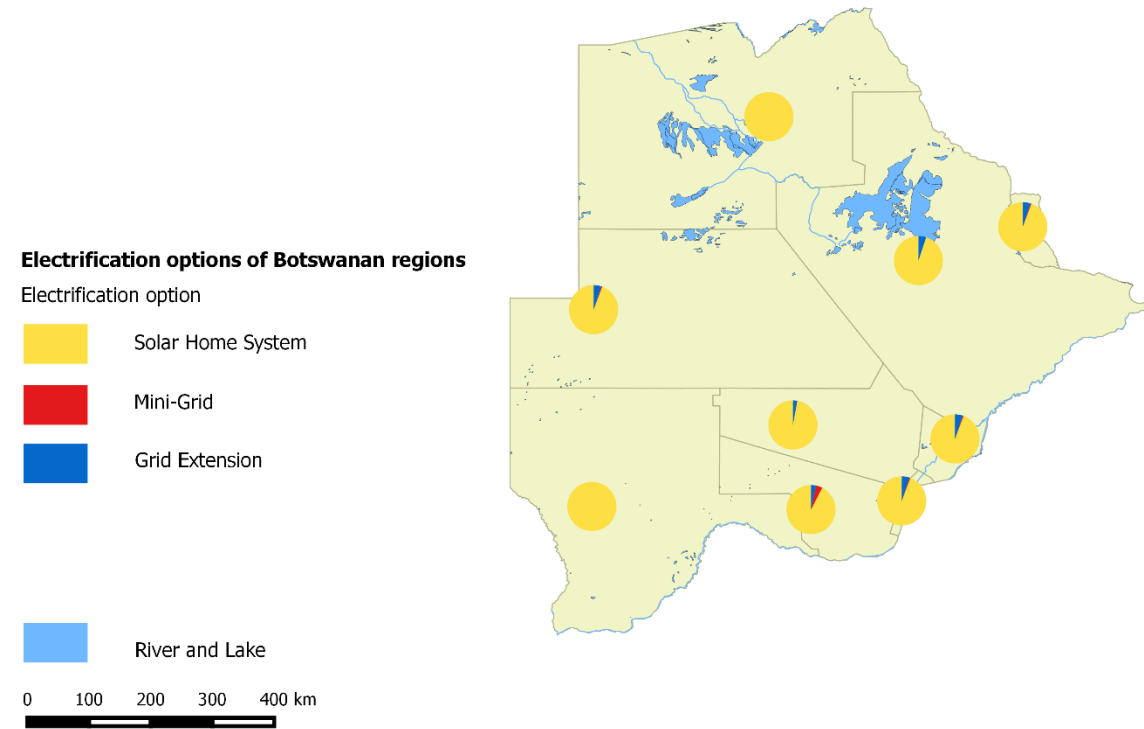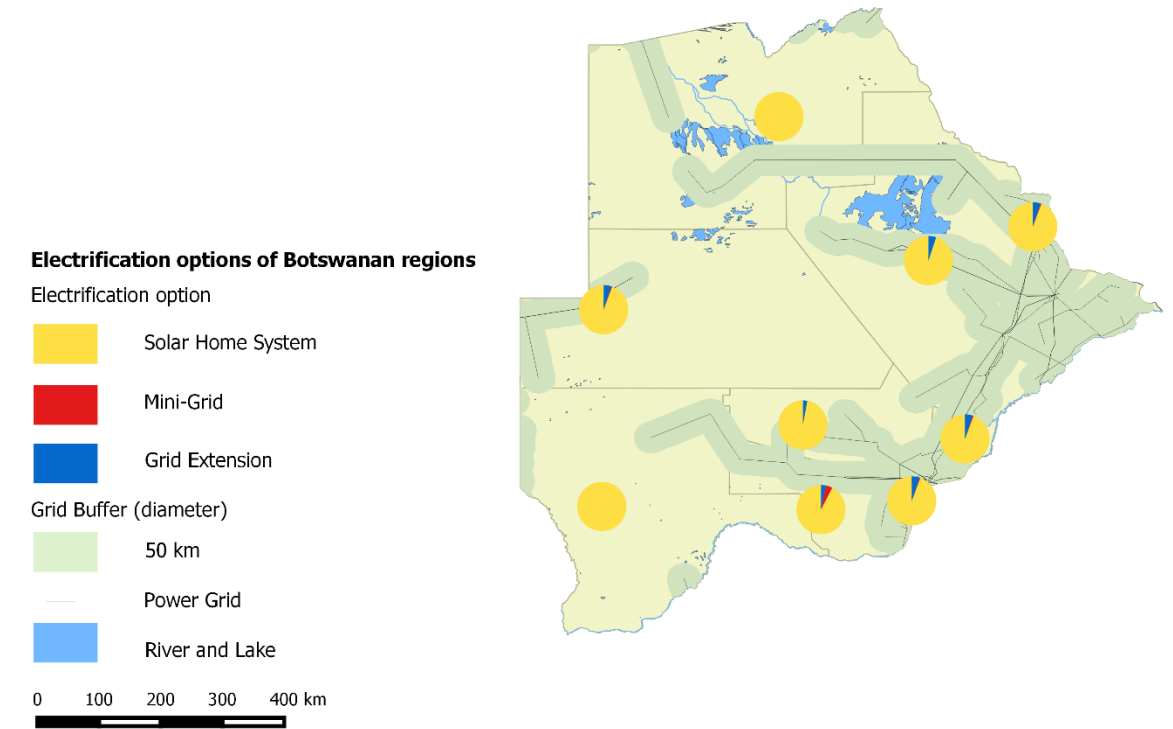

# Electrification option: GridBuilt-SHSDom

# Electrification option: GridBuilt-GridDom

Electrification options of Botswanan regions

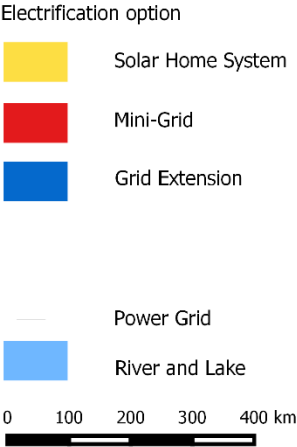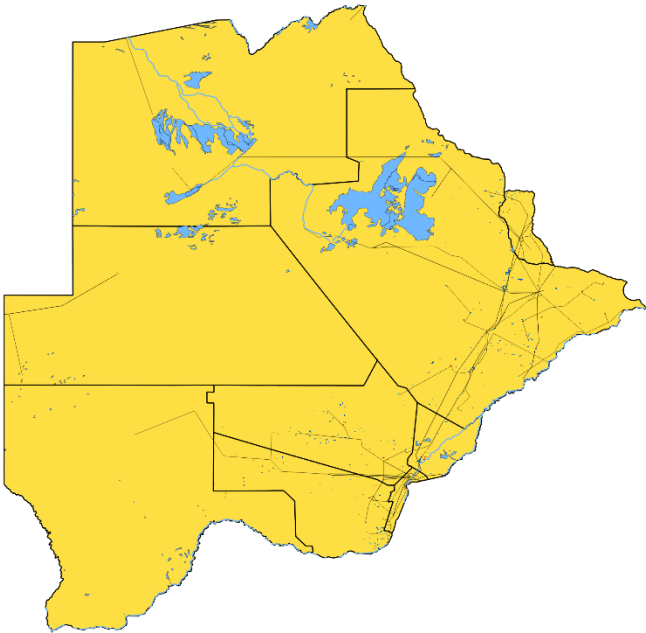

Electrification options of Botswanan regions

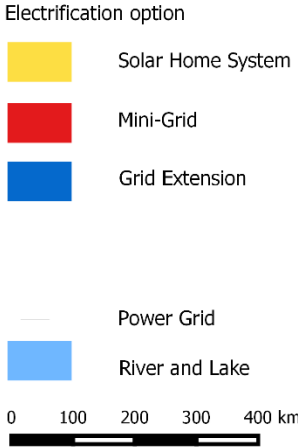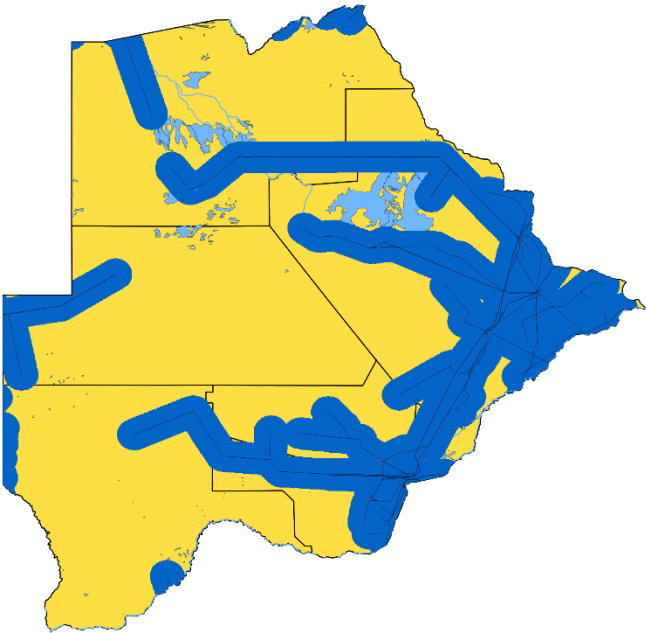

Share of electrification options in all Botswanan regions

SHS (%) Mini-Grid (%) Grid (%)

GridBuilt-GridDom

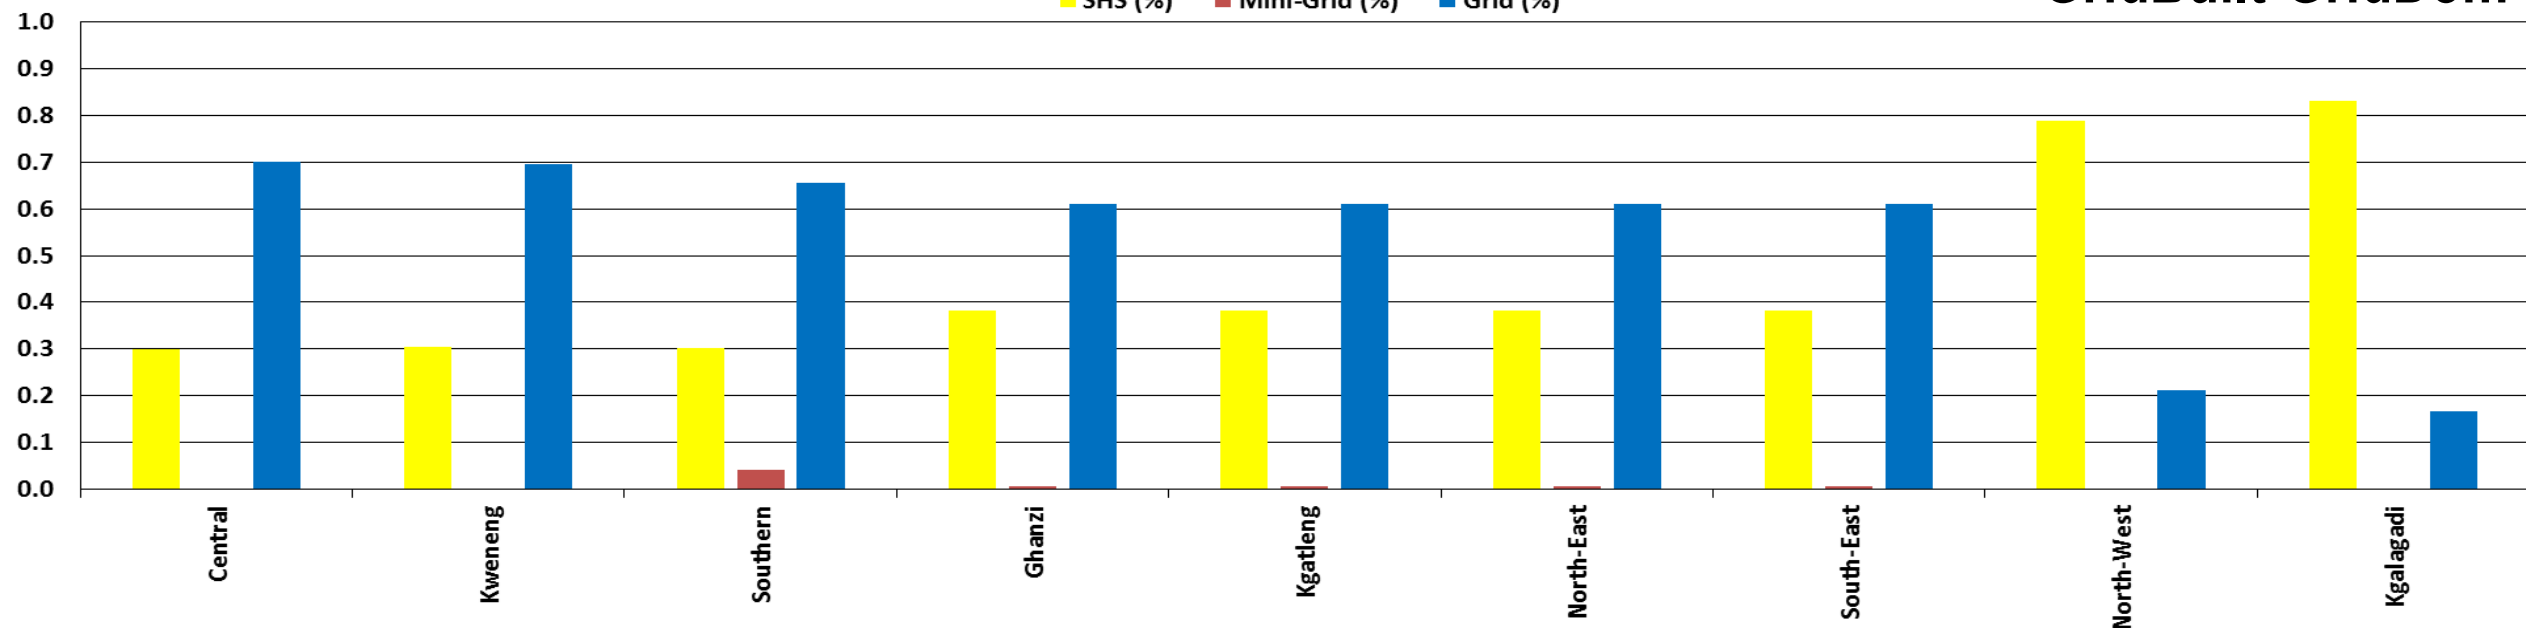

Share of electrification options in all Botswanan regions

SHS (%) Mini-Grid (%) Grid (%)

GridBuilt-SHSDom

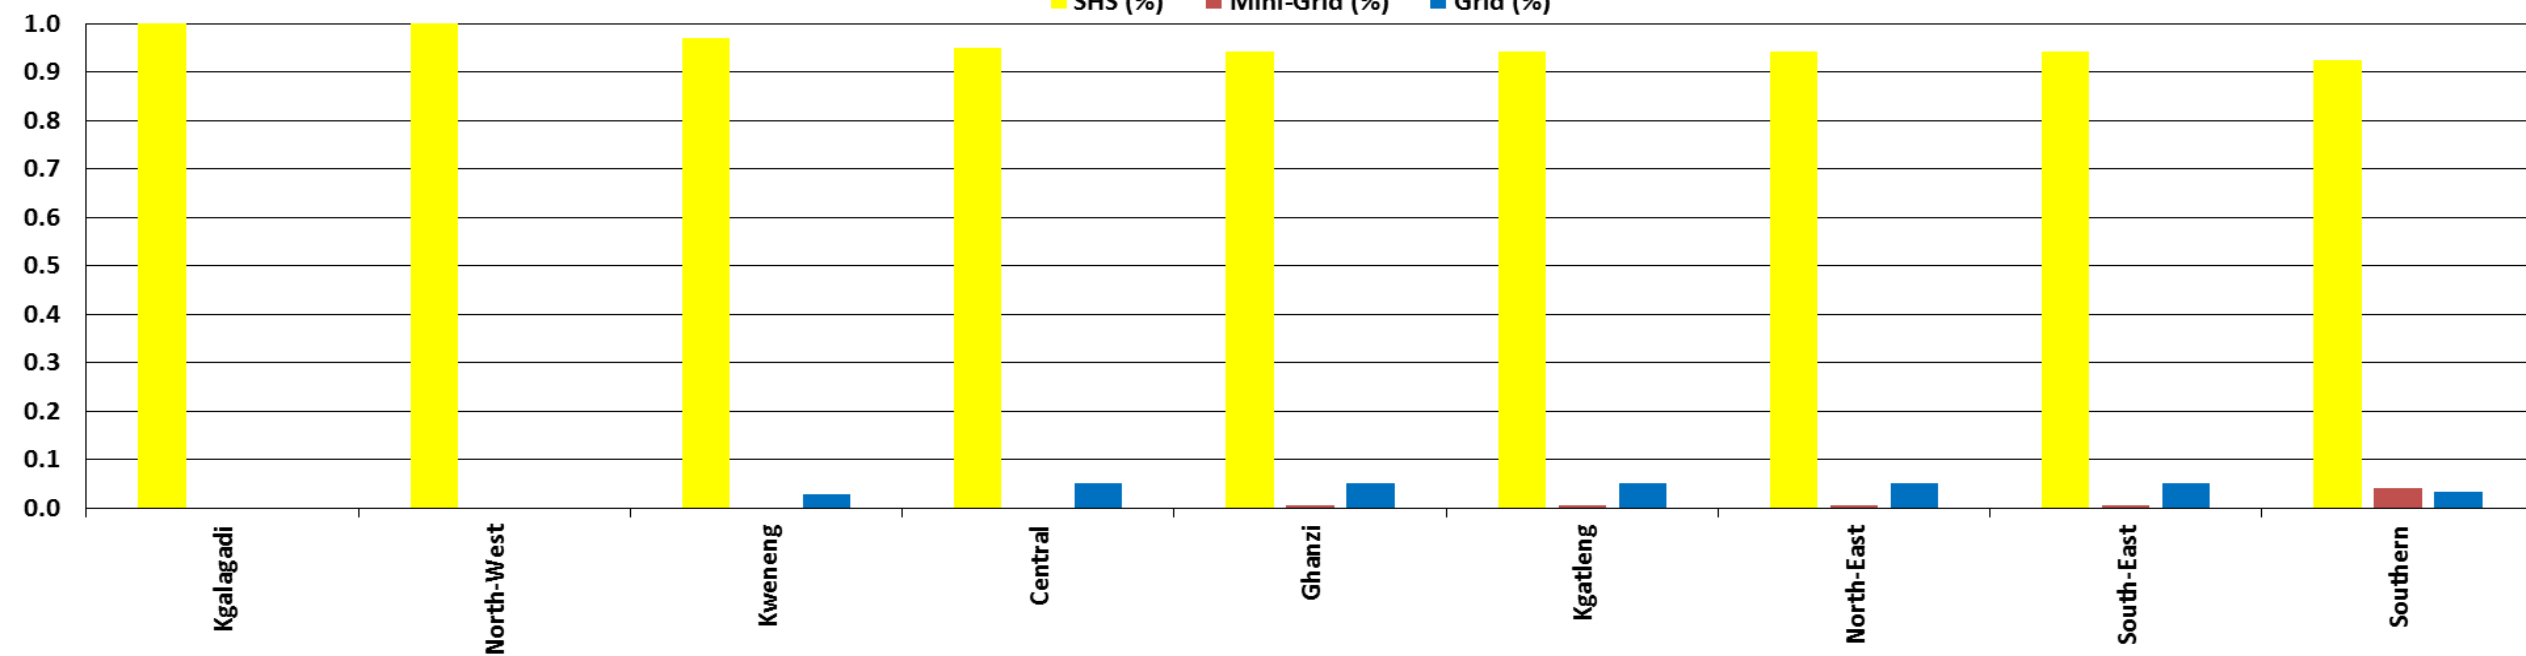

# Electrification option in all Botswanan regions: GridPlanned-GridDom

Electrification options of Botswanan regions

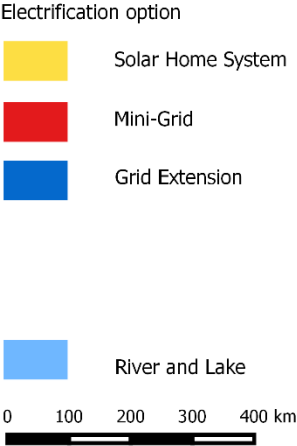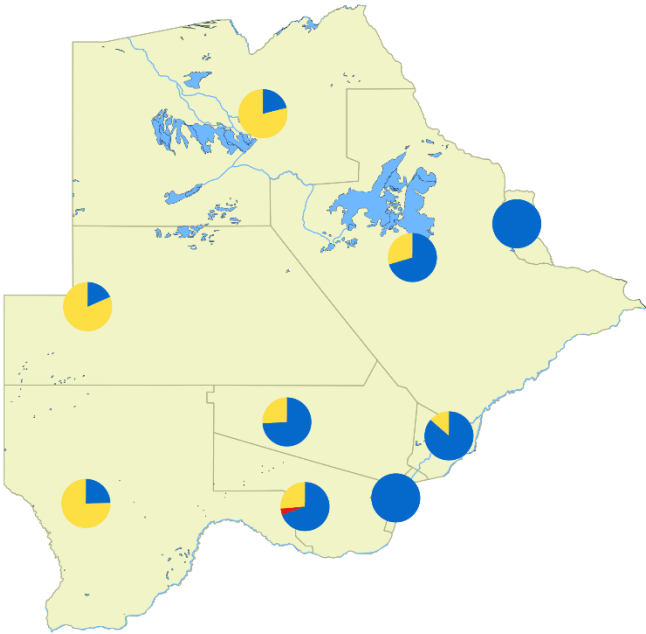

Electrification options of Botswanan regions

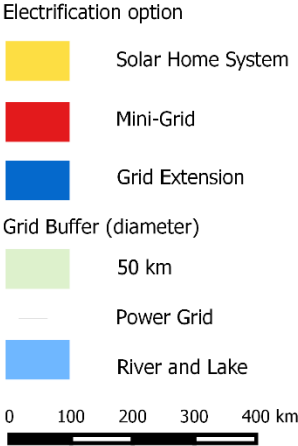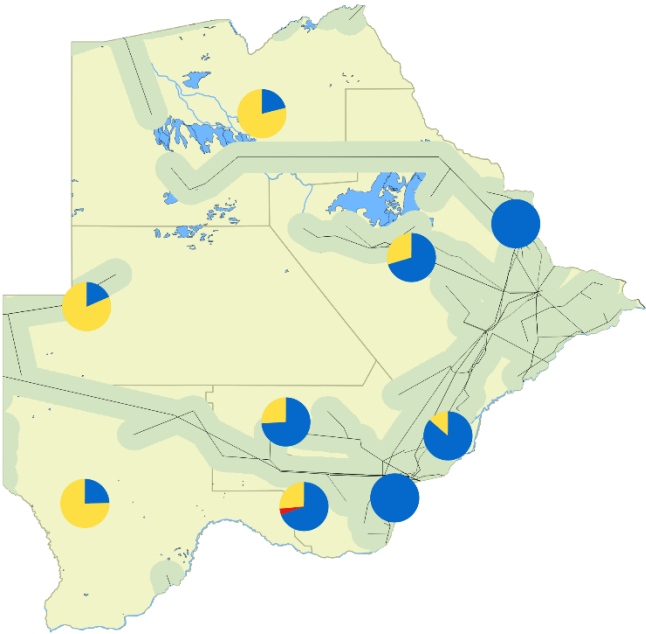

# Electrification option in all Botswanan regions: GridPlanned-SHSDom

Electrification options of Botswanan regions

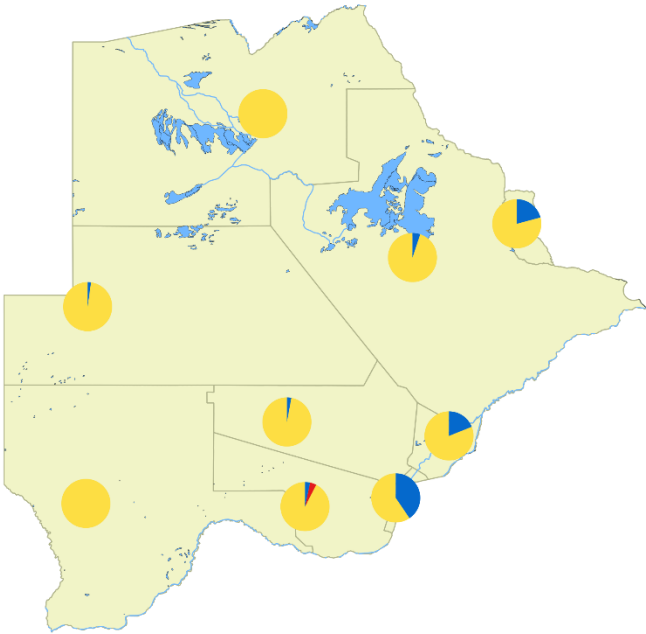

Electrification options of Botswanan regions

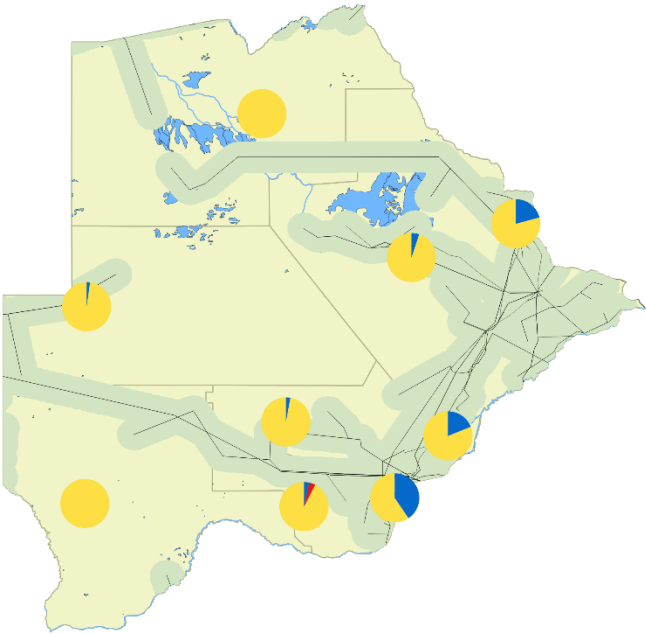

# Electrification option: GridPlanned-SHSDom

# Electrification option: GridPlanned-GridDom

Electrification options of Botswanan regions

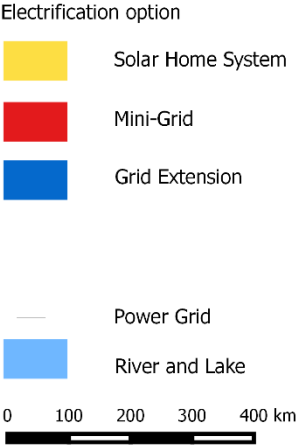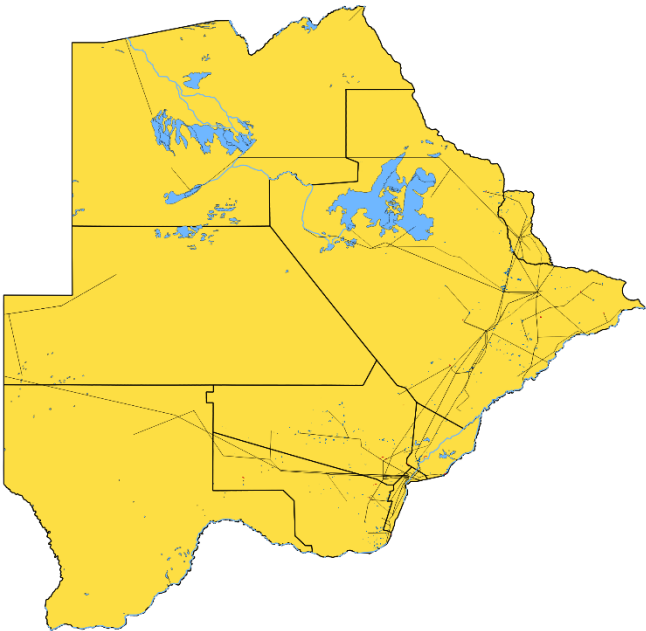

Electrification options of Botswanan regions

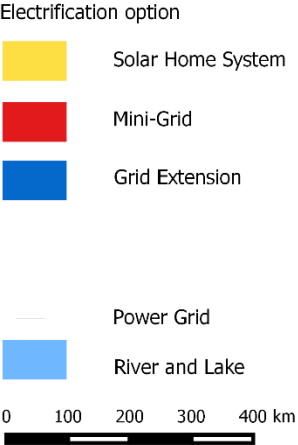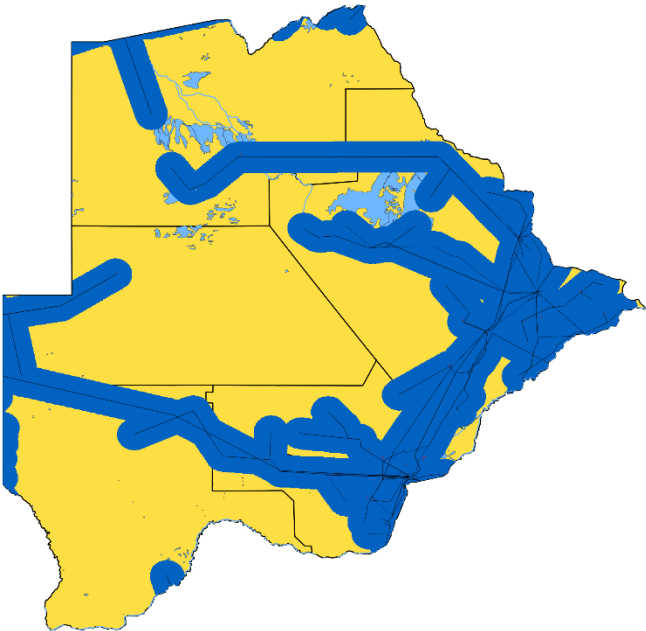

Share of electrification options in all Botswanan regions

SHS (%) Mini-Grid (%) Grid (%)

GridPlanned-GridDom

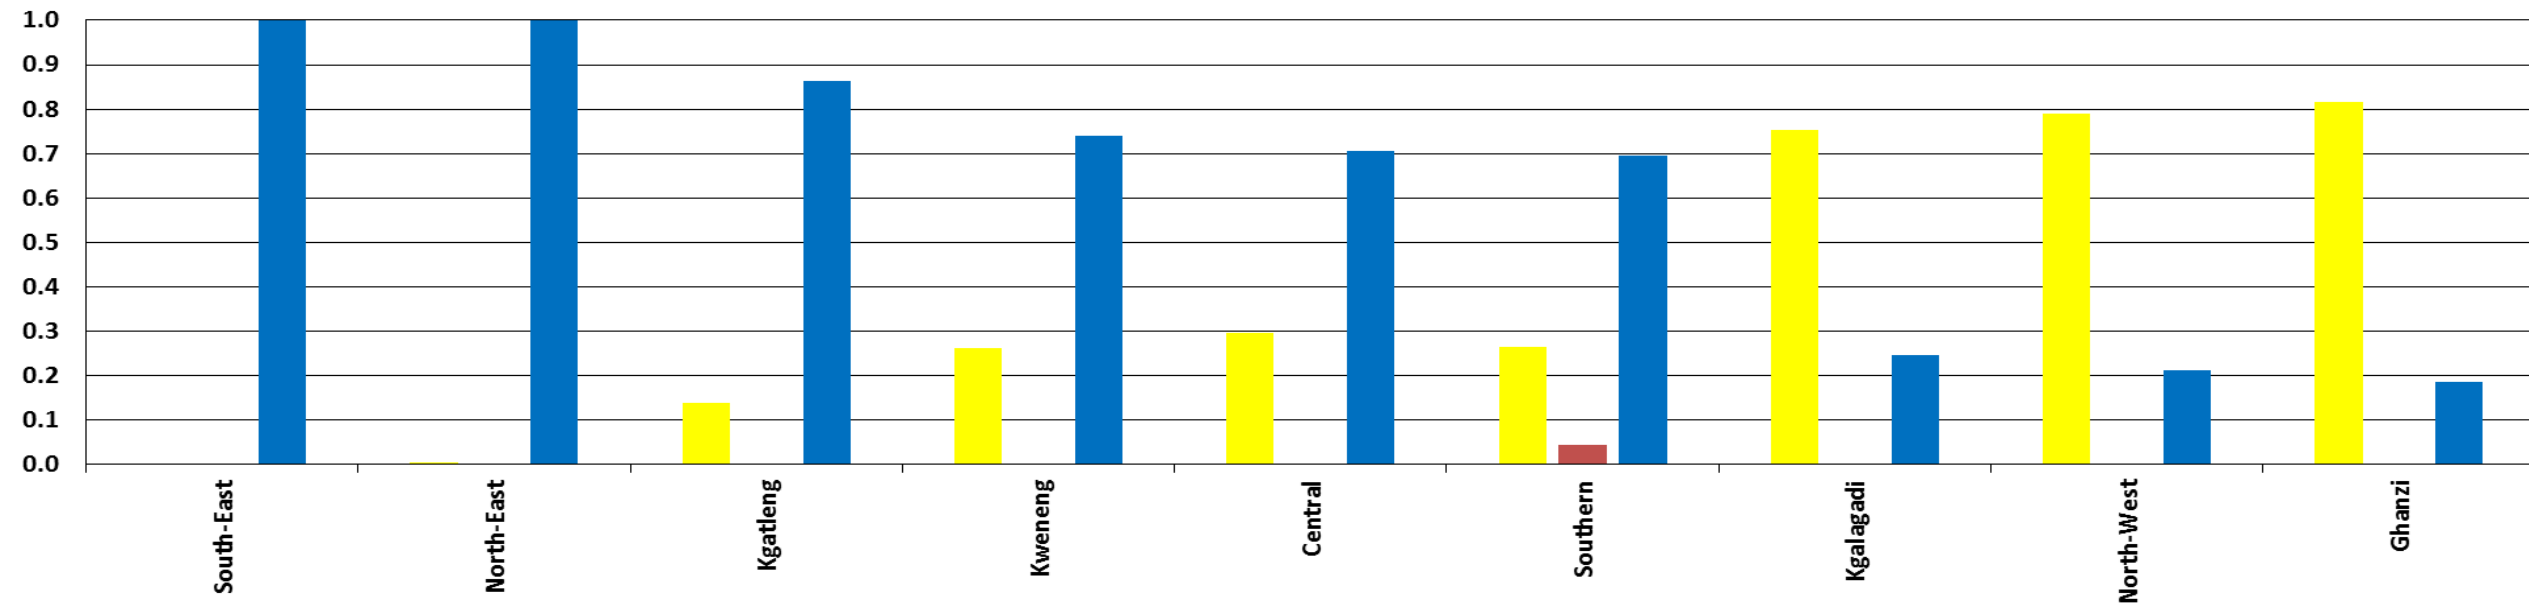

Share of electrification options in all Botswanan regions

SHS (%) Mini-Grid (%) Grid (%)

GridPlanned-SHSDom

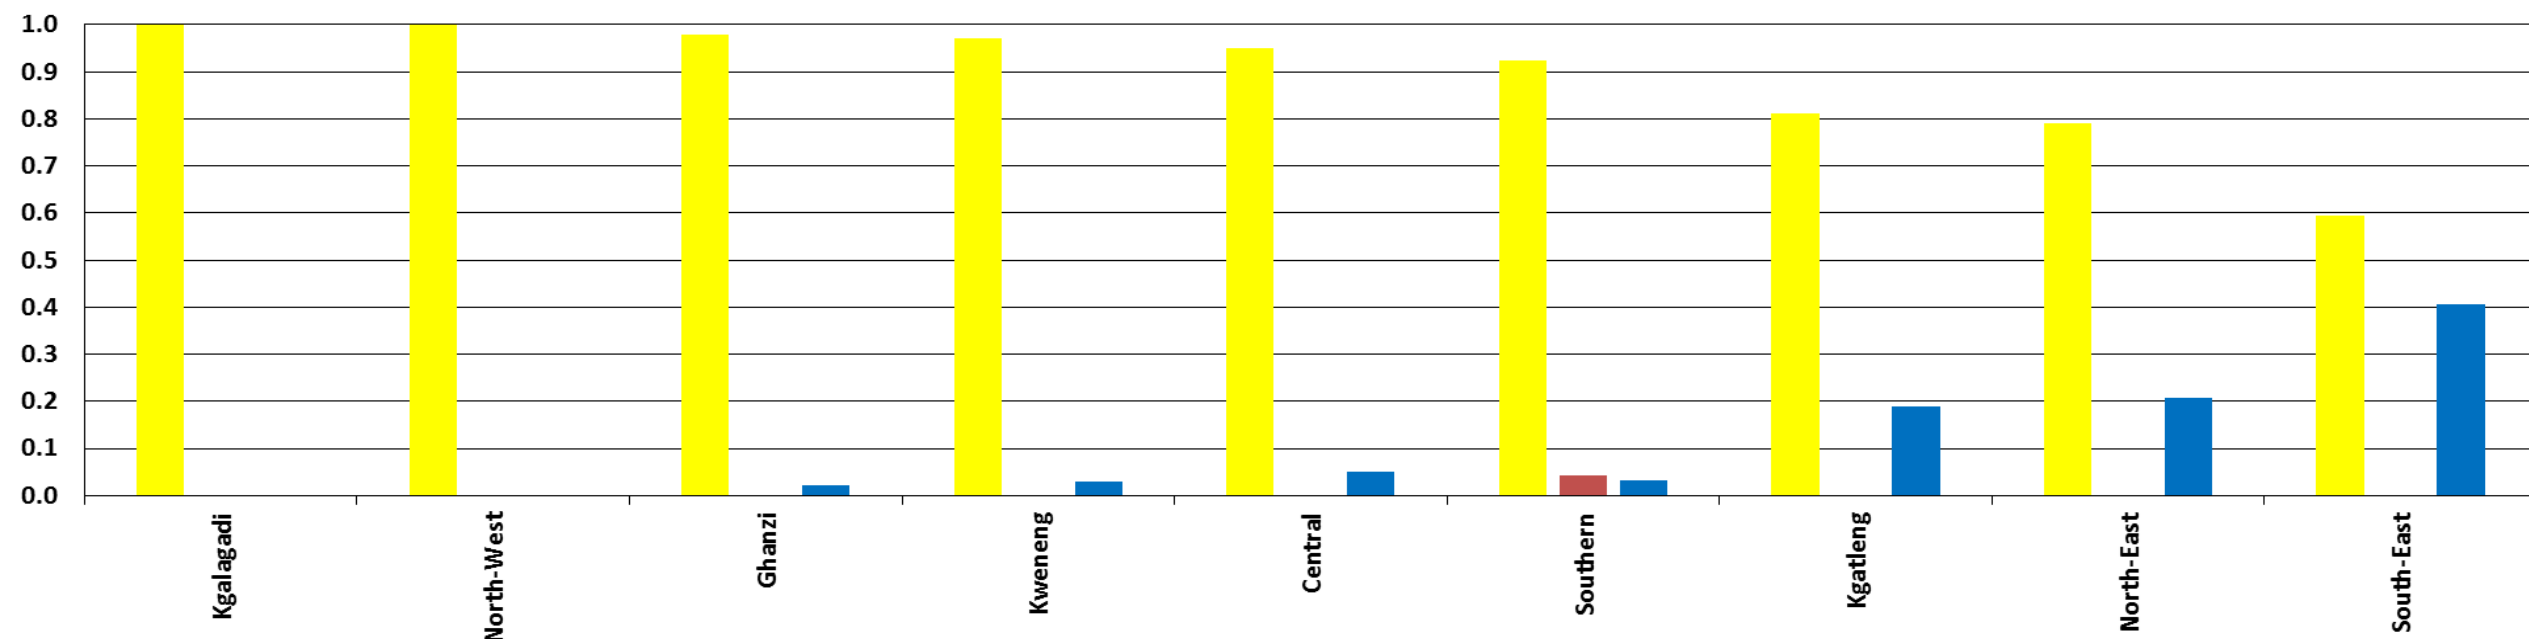

# Lesotho

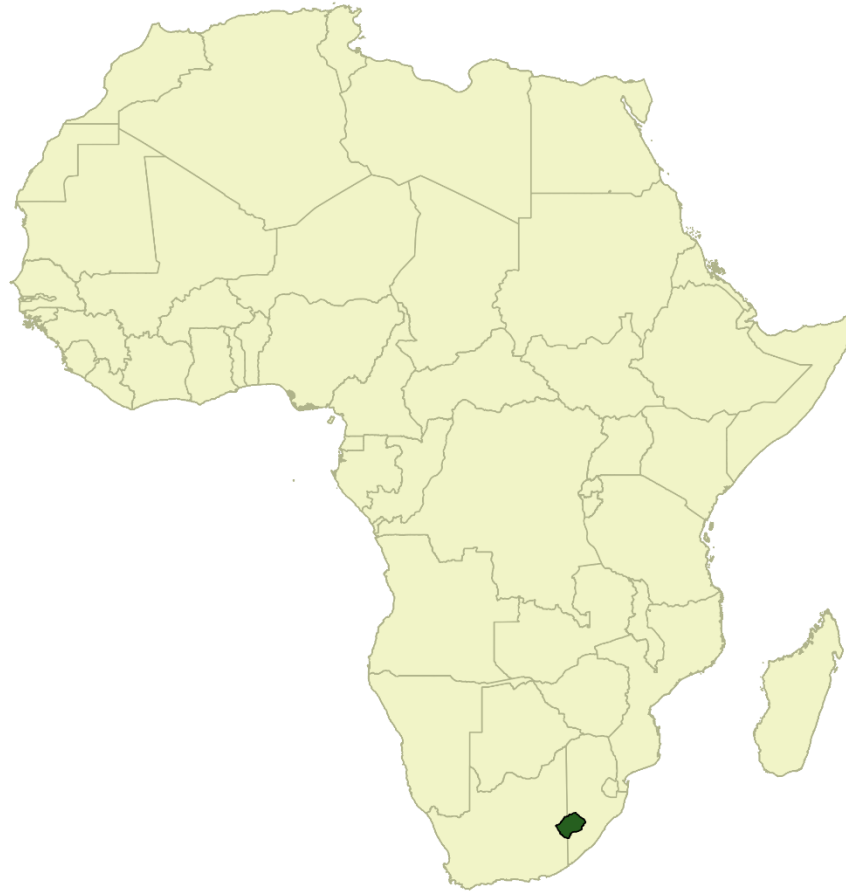

# Night light emission and Population of Basotho regions

Night light emission in Lesotho

Detected night lights

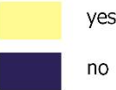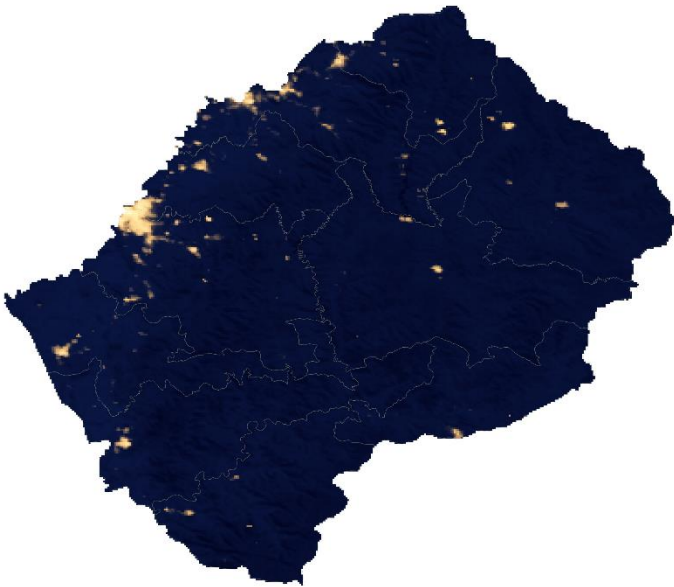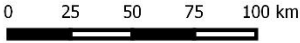

Population structure of Lesotho

Population density (people/750x750m<sup>2</sup>)

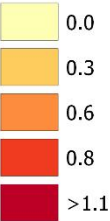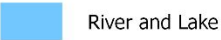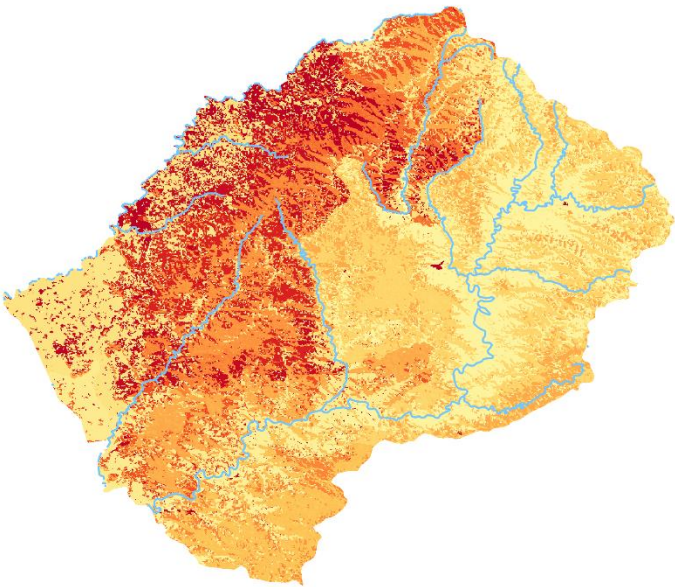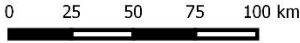

# Electrification option in all Basotho regions: GridBuilt-GridDom

Electrification options of Basotho regions

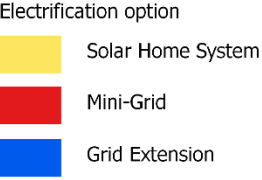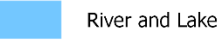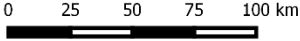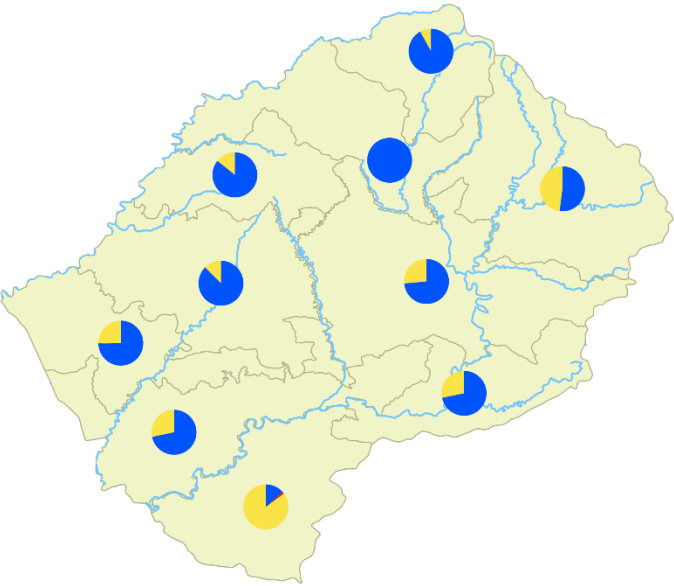

Electrification options of Basotho regions

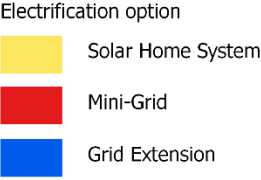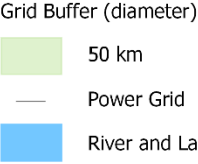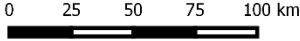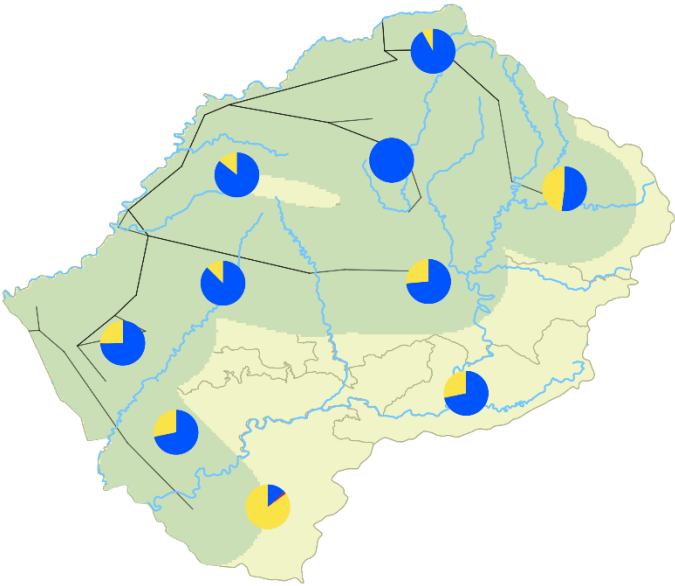

# Electrification option in all Basotho regions: GridBuilt-SHSDom

**Electrification options of Basotho regions**

- Electrification option
- Solar Home System
  - Mini-Grid
  - Grid Extension

River and Lake

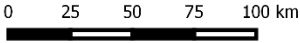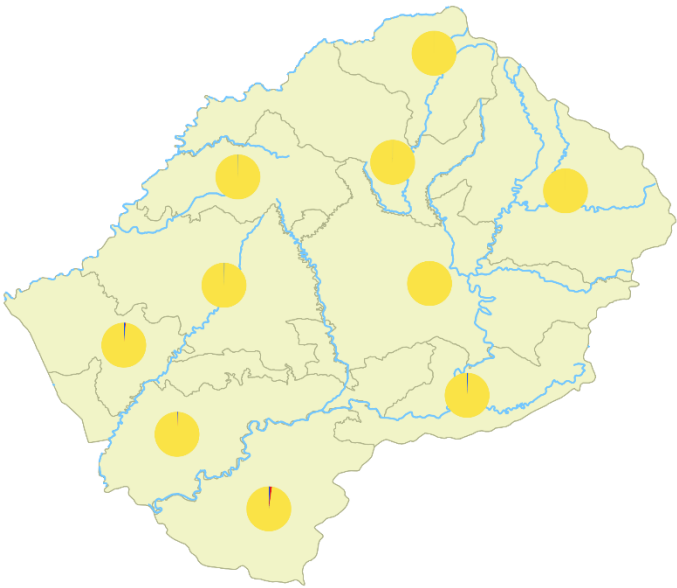

**Electrification options of Basotho regions**

- Electrification option
- Solar Home System
  - Mini-Grid
  - Grid Extension

Grid Buffer (diameter)

- 50 km
- Power Grid
- River and Lake

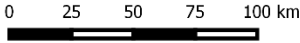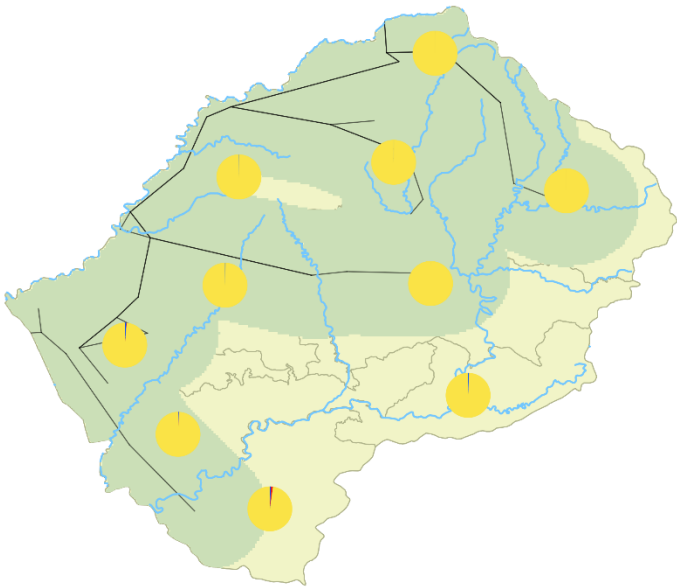

# Electrification option: GridBuilt-SHSDom

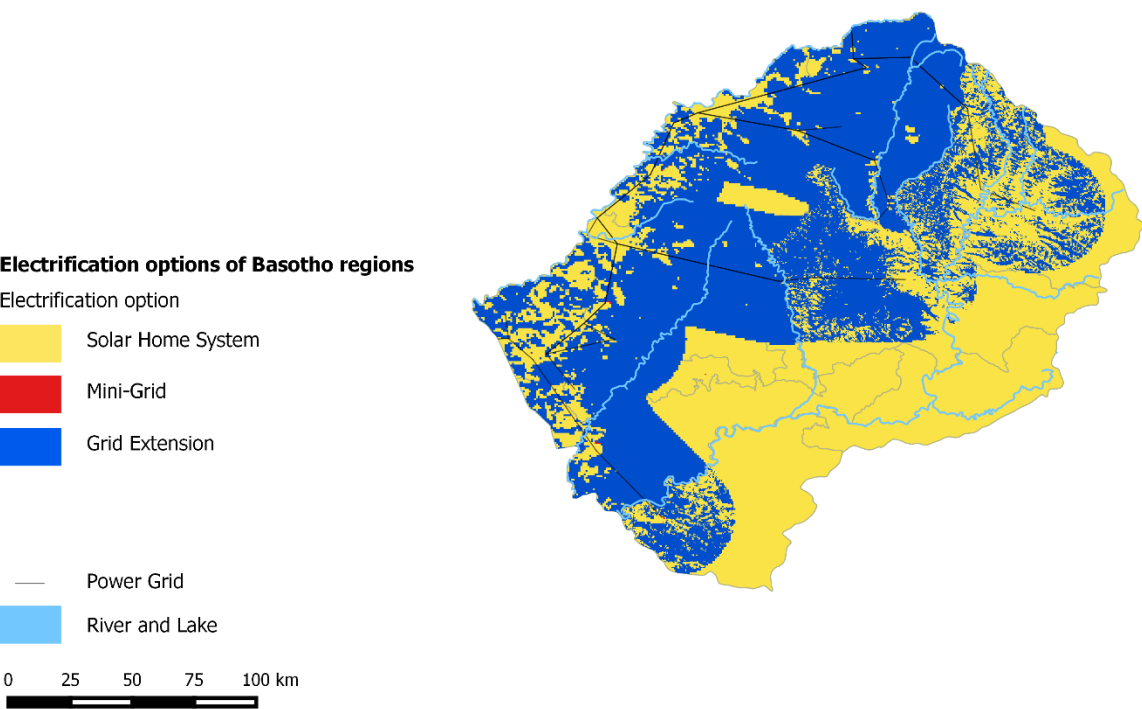

# Electrification option: GridBuilt-GridDom

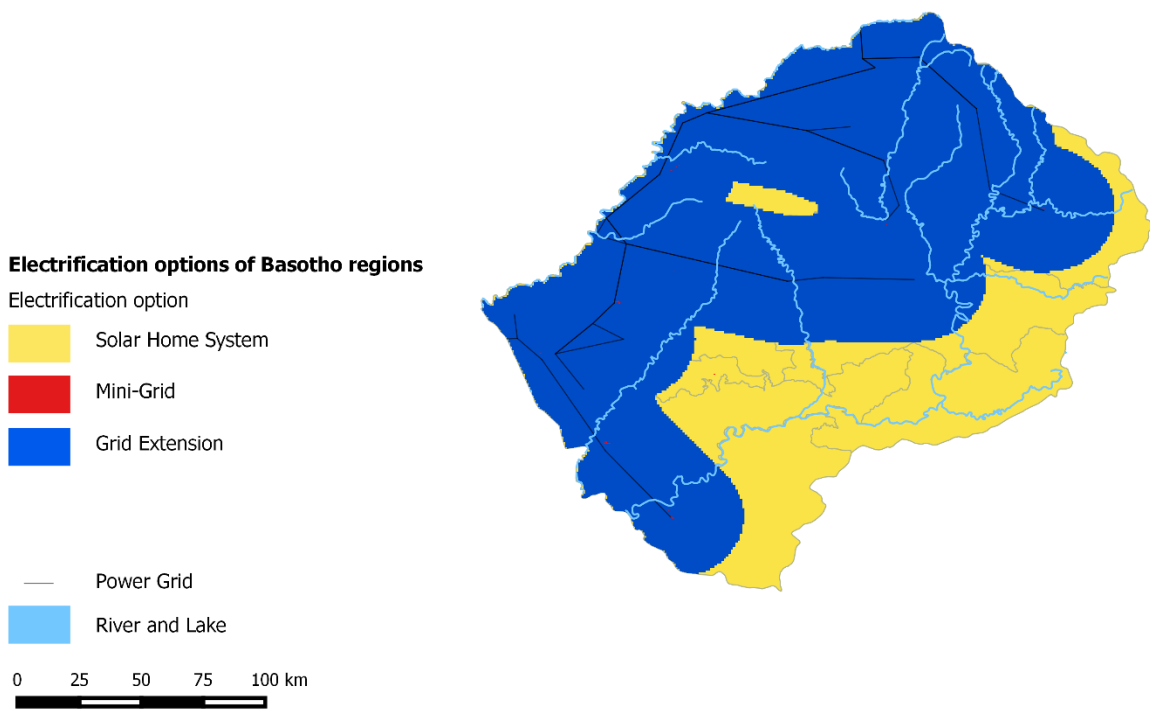

Share of electrification options in all Basotho regions

SHS (%) Mini-Grid (%) Grid (%)

GridBuilt-GridDom

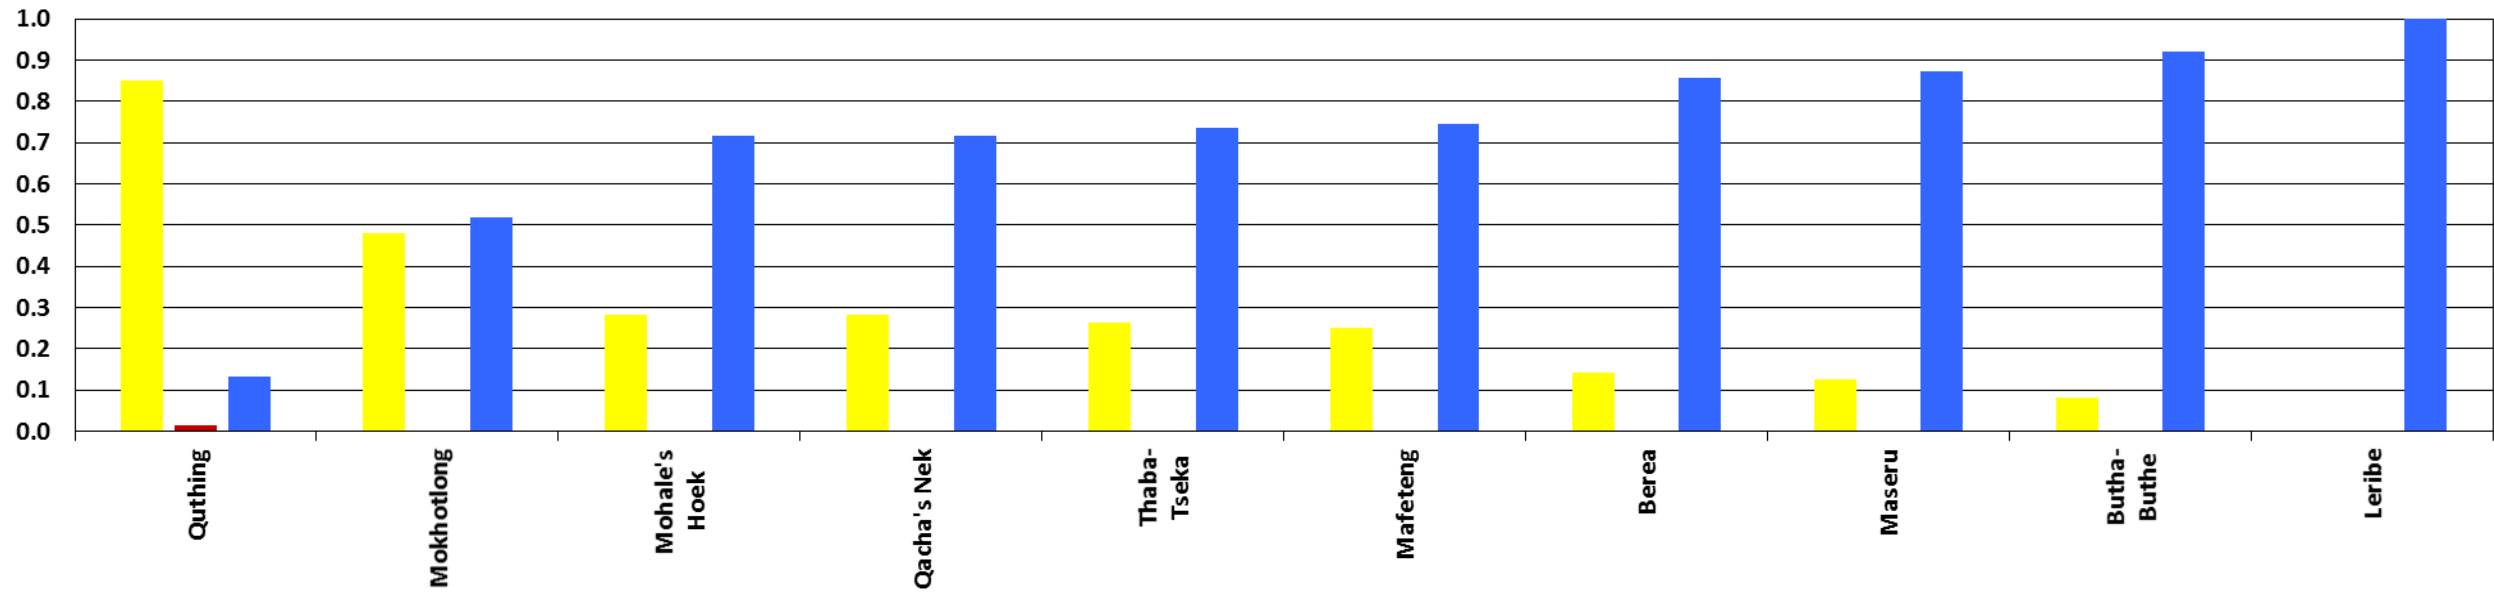

Share of electrification options in all Basotho regions

SHS (%) Mini-Grid (%) Grid (%)

GridBuilt-SHSDom

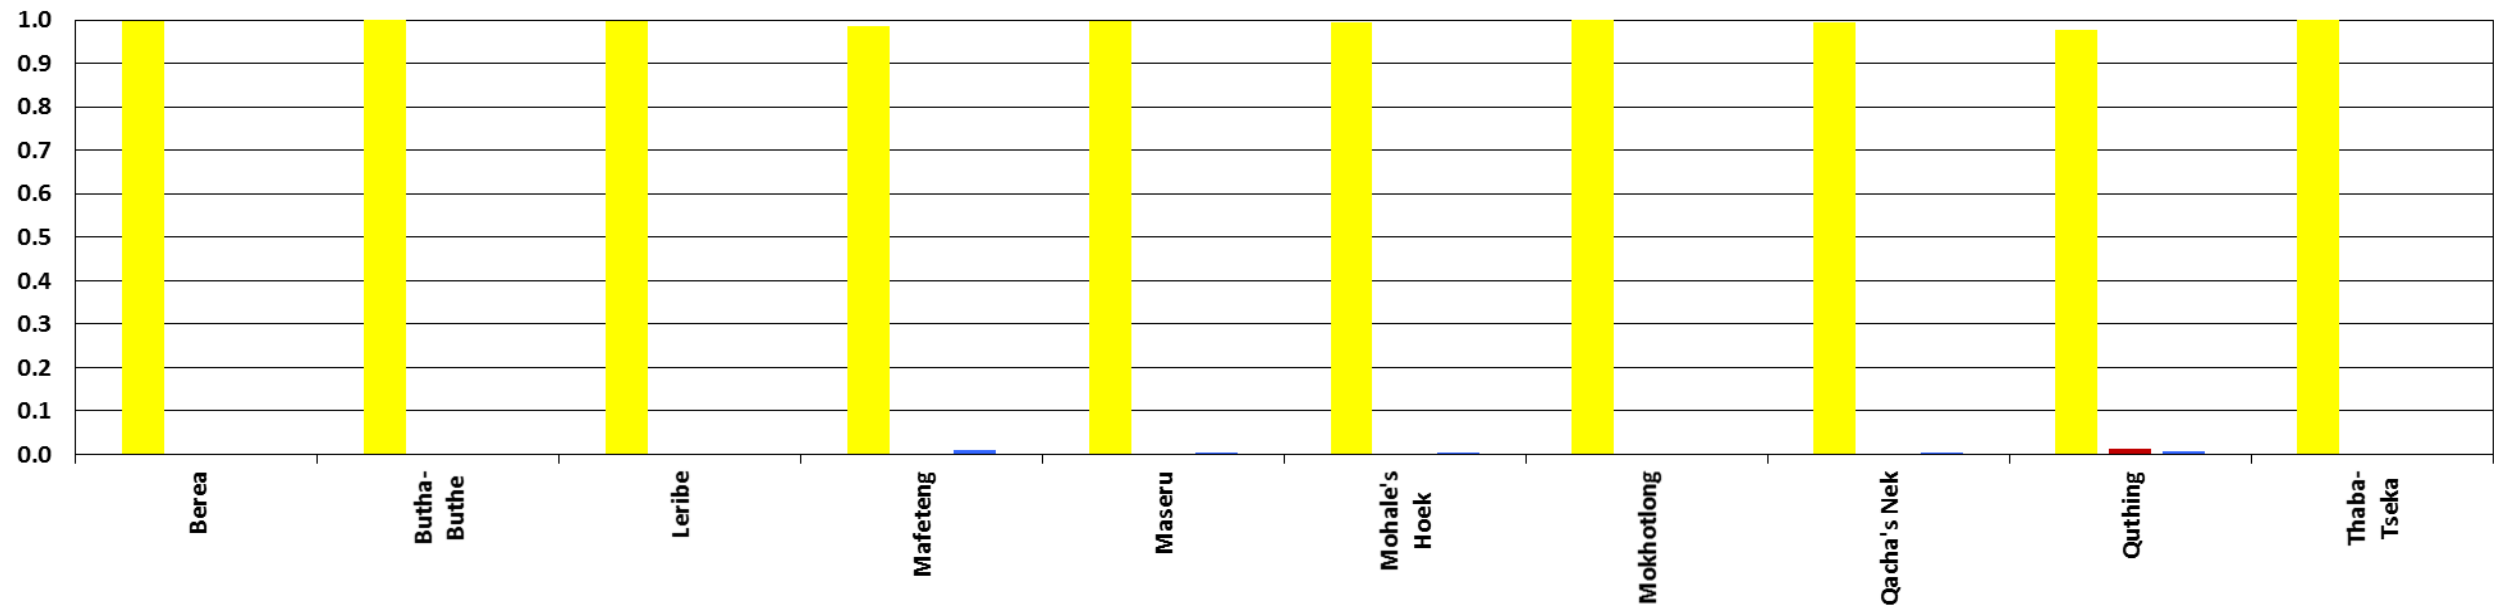

# Namibia

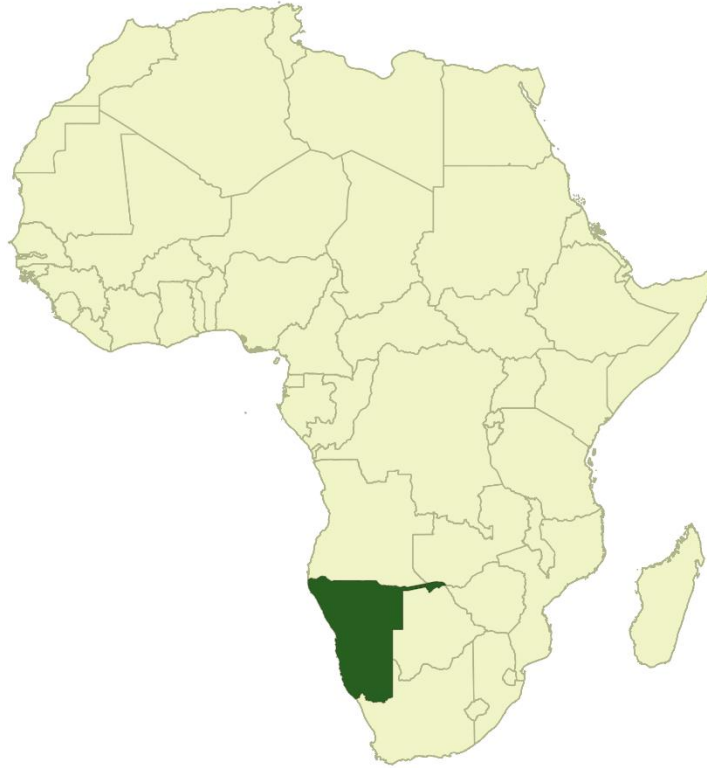

# Night light emission and Population of Namibian regions

## Night light emission in Namibia

Detected night lights

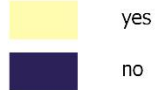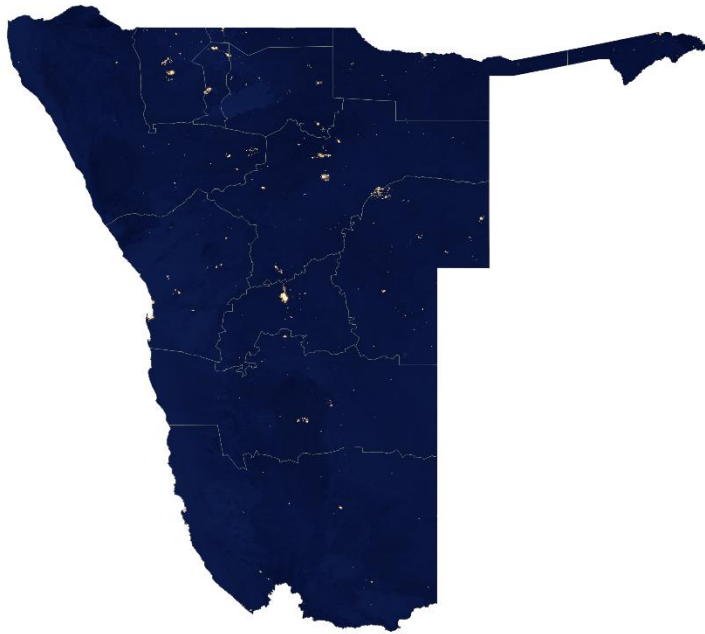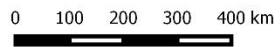

## Population structure of Namibia

Population density (people/750x750m<sup>2</sup>)

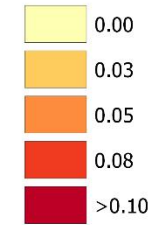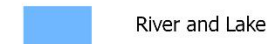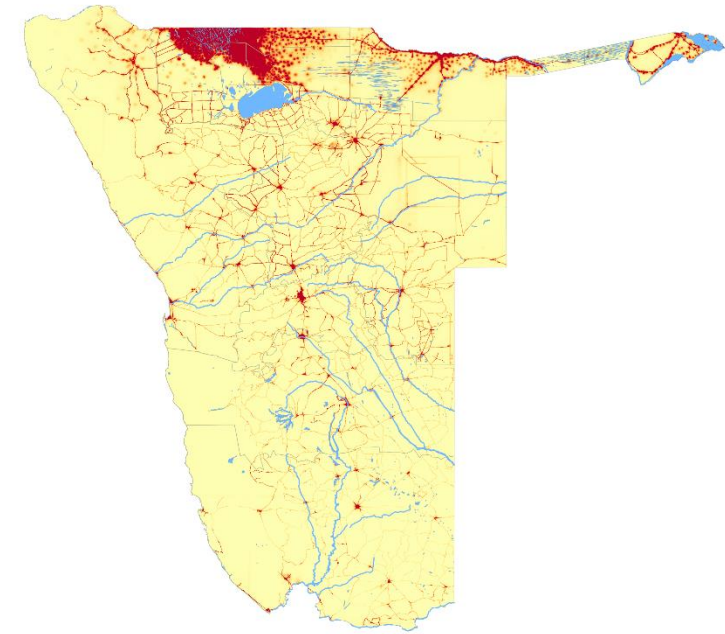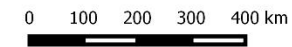

# Electrification option in all Namibian regions: GridBuilt-GridDom

## Electrification options of Namibian regions

Electrification option

 Solar Home System

 Mini-Grid

 Grid Extension

 River and Lake

0 100 200 300 400 km

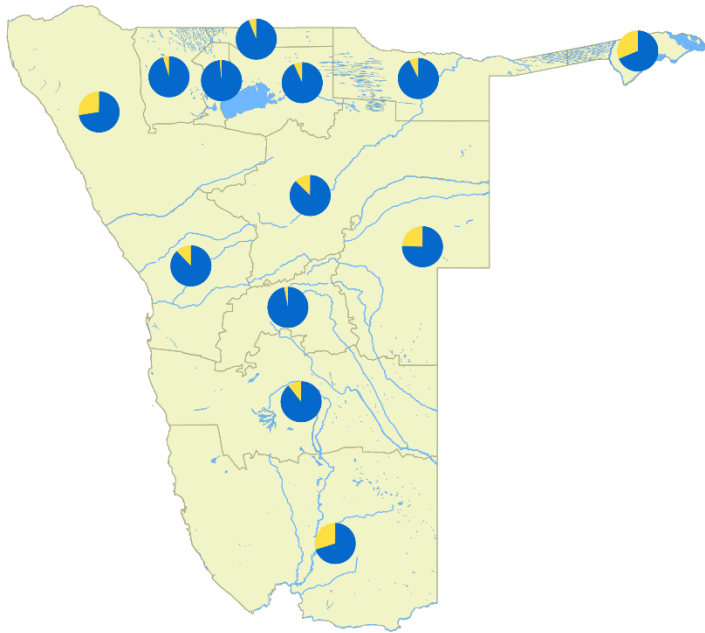

## Electrification options of Namibian regions

Electrification option

 Solar Home System

 Mini-Grid

 Grid Extension

Grid Buffer (diameter)

 50 km

 Power Grid

 River and Lake

0 100 200 300 400 km

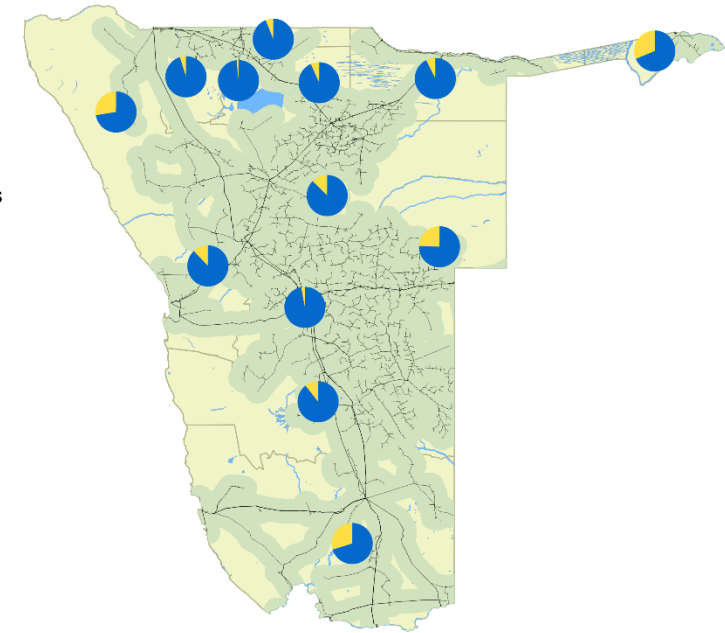

# Electrification option in all Namibian regions: GridBuilt-SHSDom

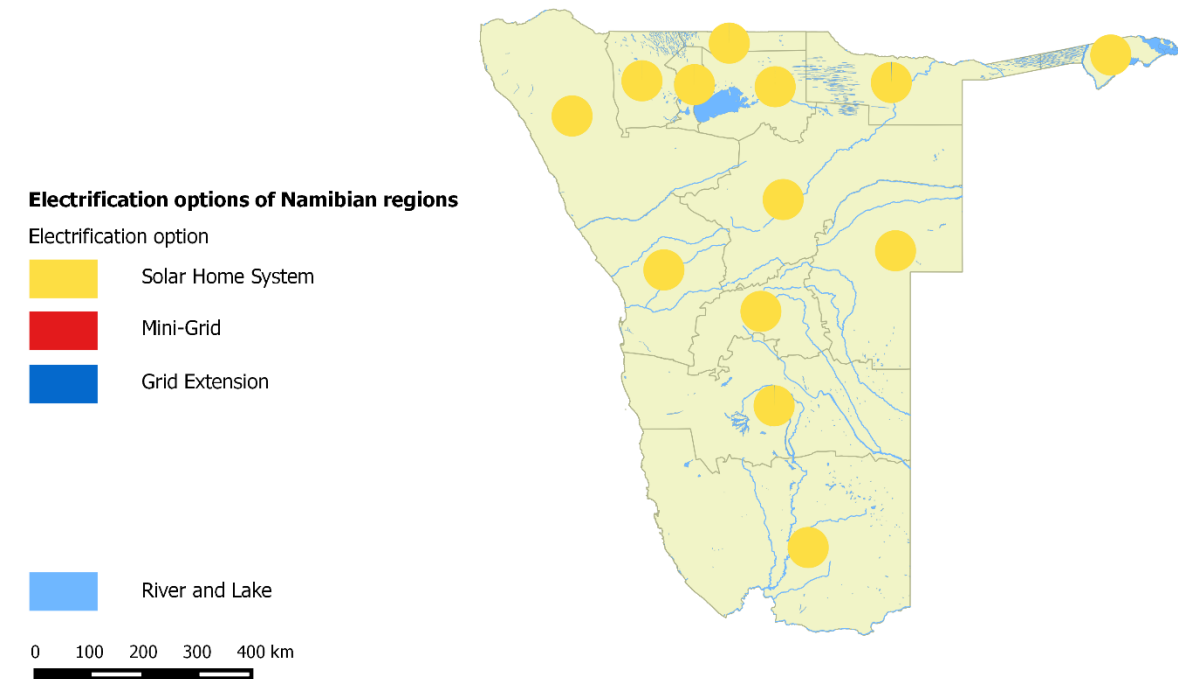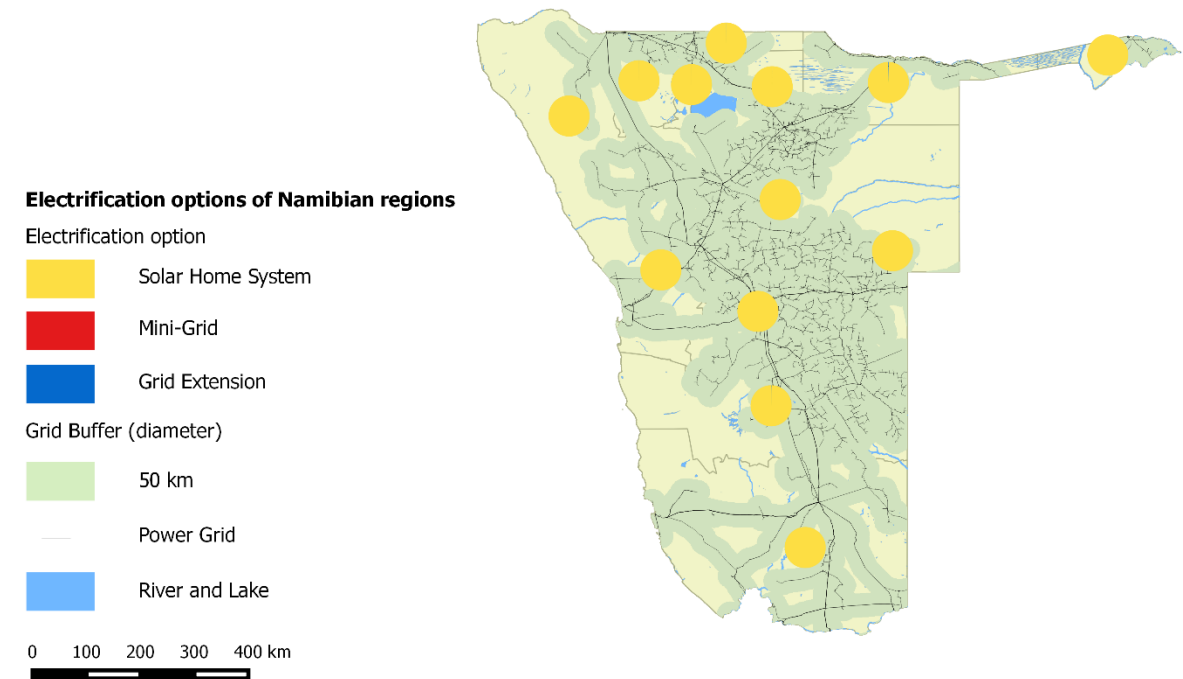

# Electrification option: GridBuilt-SHSDom

## Electrification options of Namibian regions

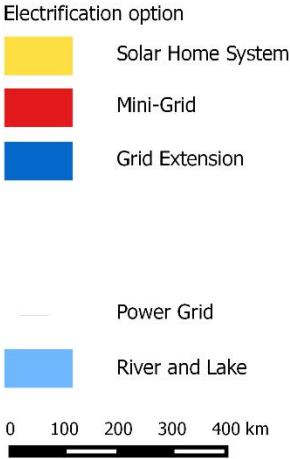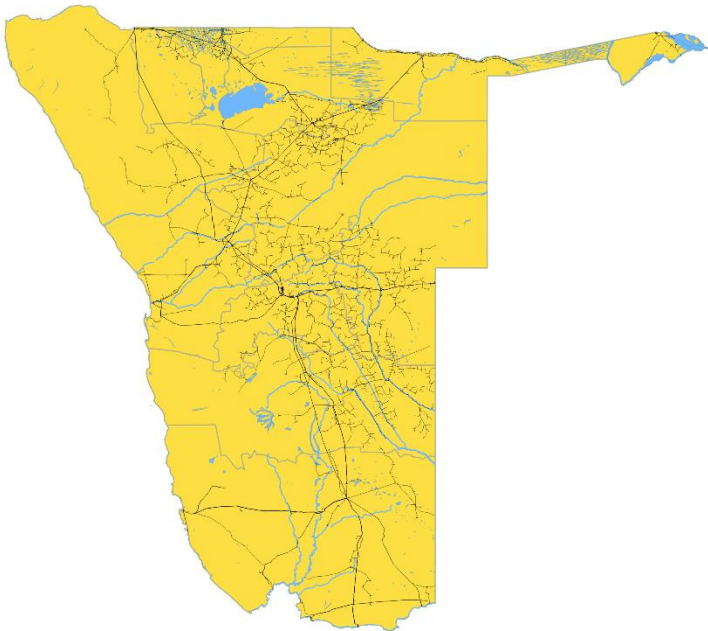

# Electrification option: GridBuilt-GridDom

## Electrification options of Namibian regions

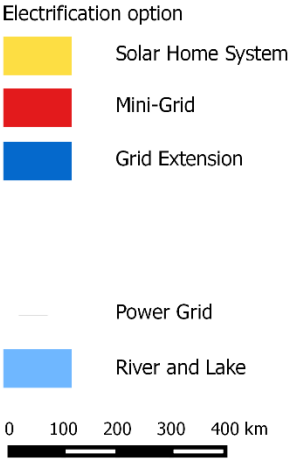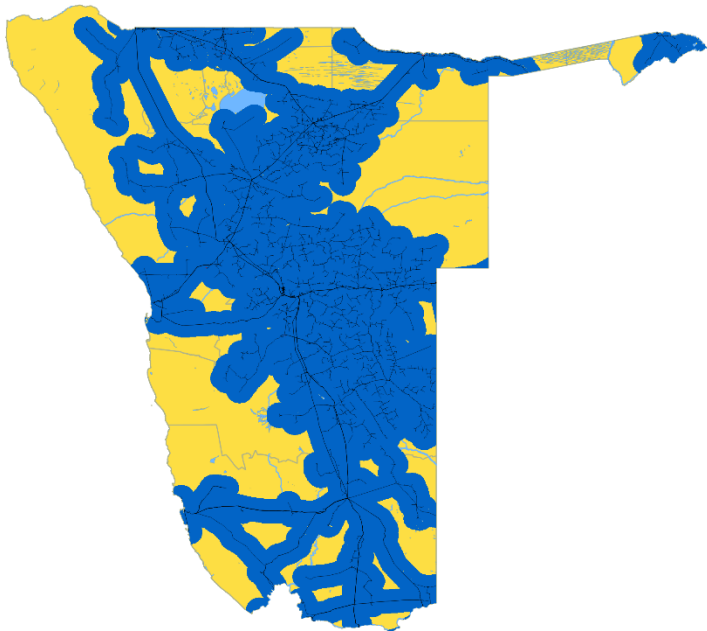

Share of electrification options in all Namibian regions

SHS (%) Mini-Grid (%) Grid (%)

GridBuilt-GridDom

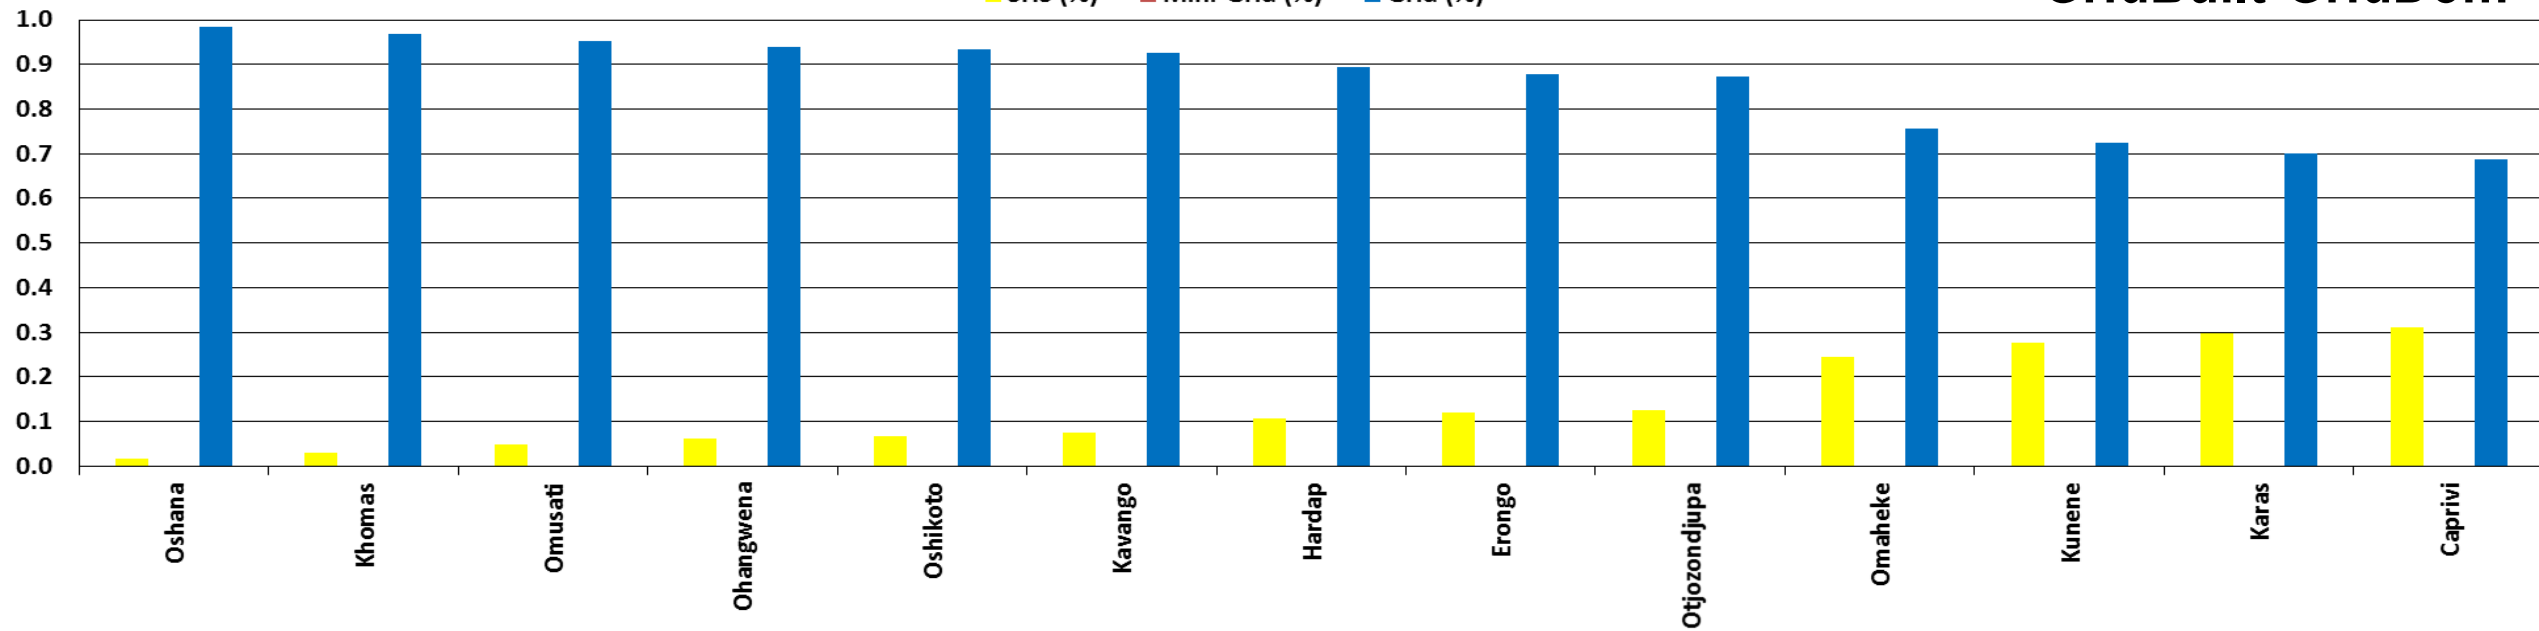

Share of electrification options in all Namibian regions

SHS (%) Mini-Grid (%) Grid (%)

GridBuilt-SHSDom

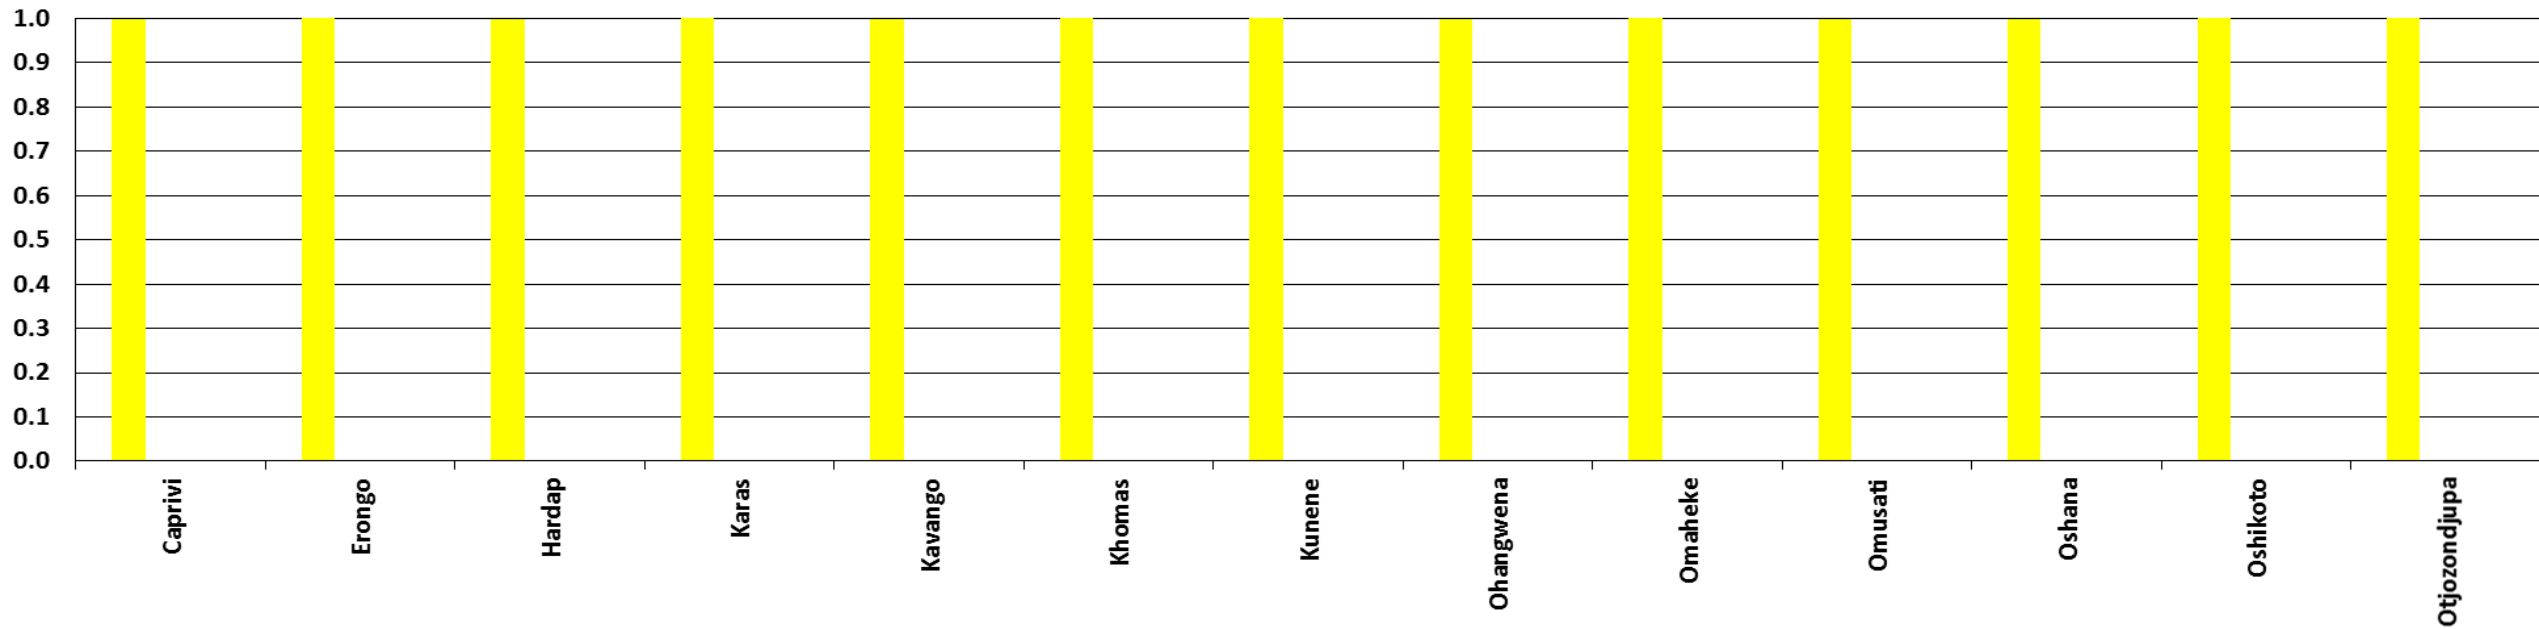

# Electrification option in all Namibian regions: GridPlanned-GridDom

## Electrification options of Namibian regions

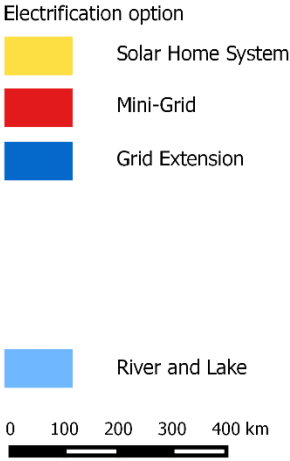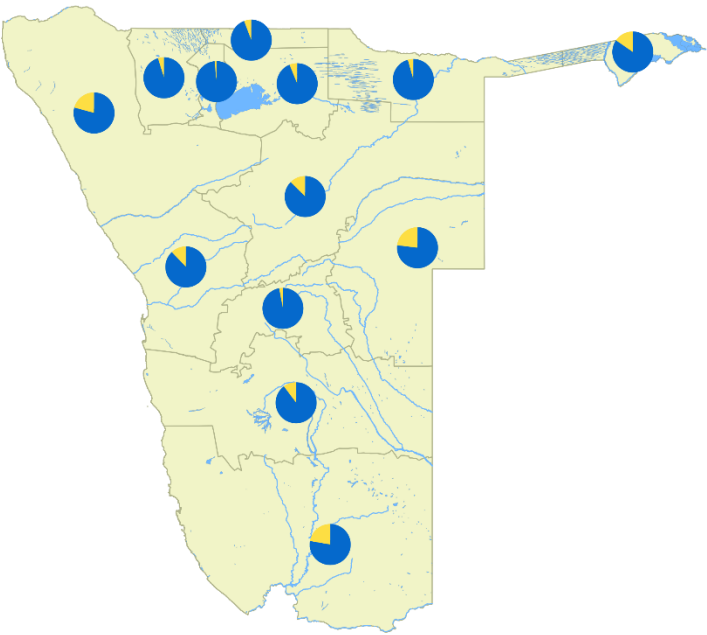

## Electrification options of Namibian regions

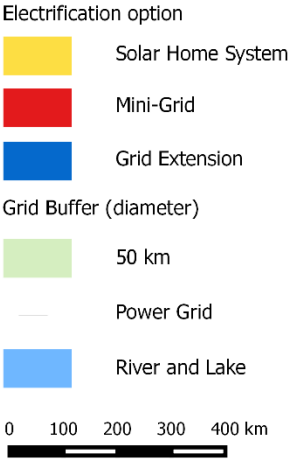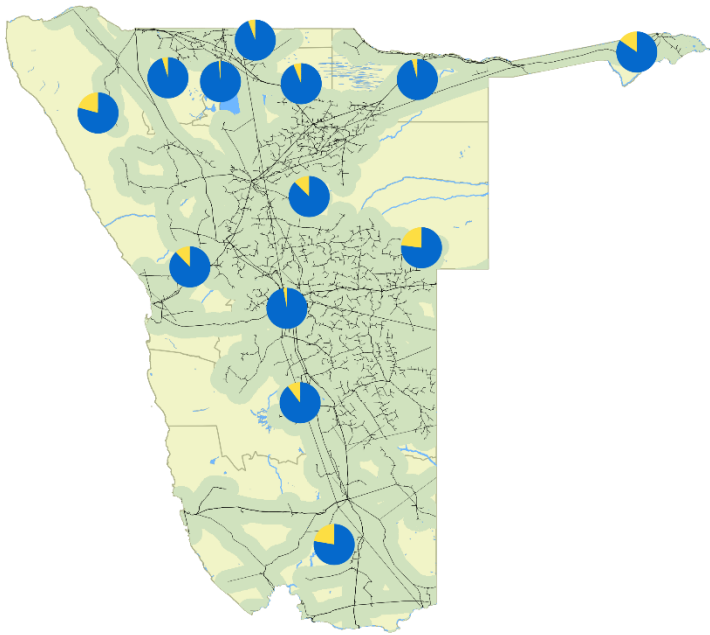

# Electrification option in all Namibian regions: GridPlanned-SHSDom

## Electrification options of Namibian regions



## Electrification options of Namibian regions



# Electrification option: GridPlanned-SHSDom

## Electrification options of Namibian regions

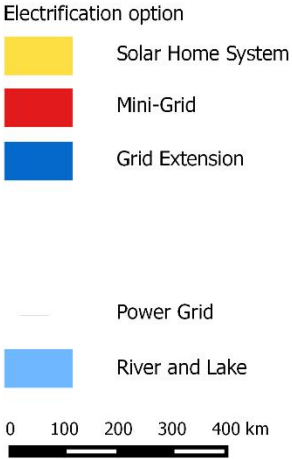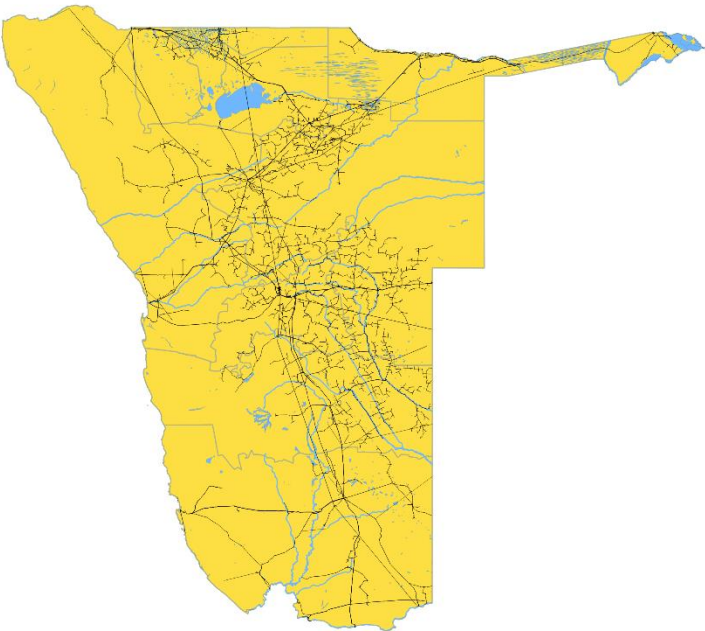

# Electrification option: GridPlanned-GridDom

## Electrification options of Namibian regions

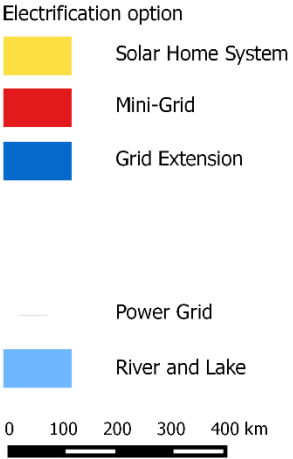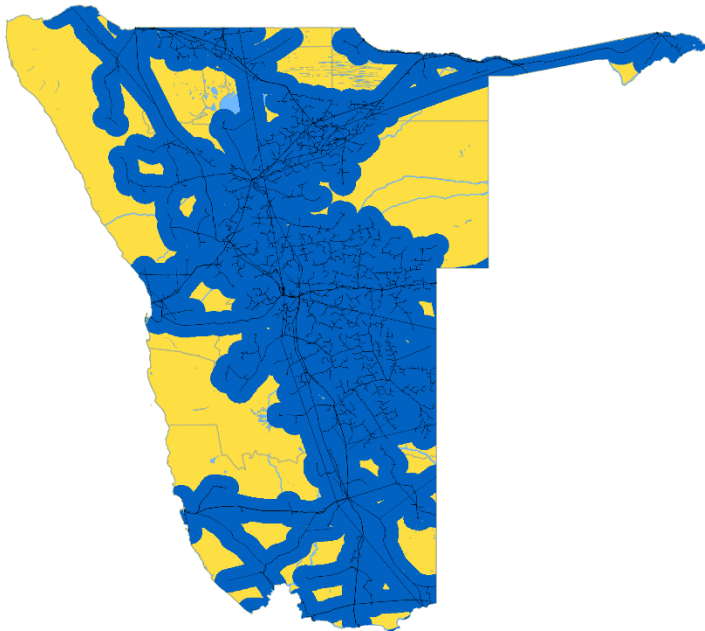

Share of electrification options in all Namibian regions

SHS (%) Mini-Grid (%) Grid (%)

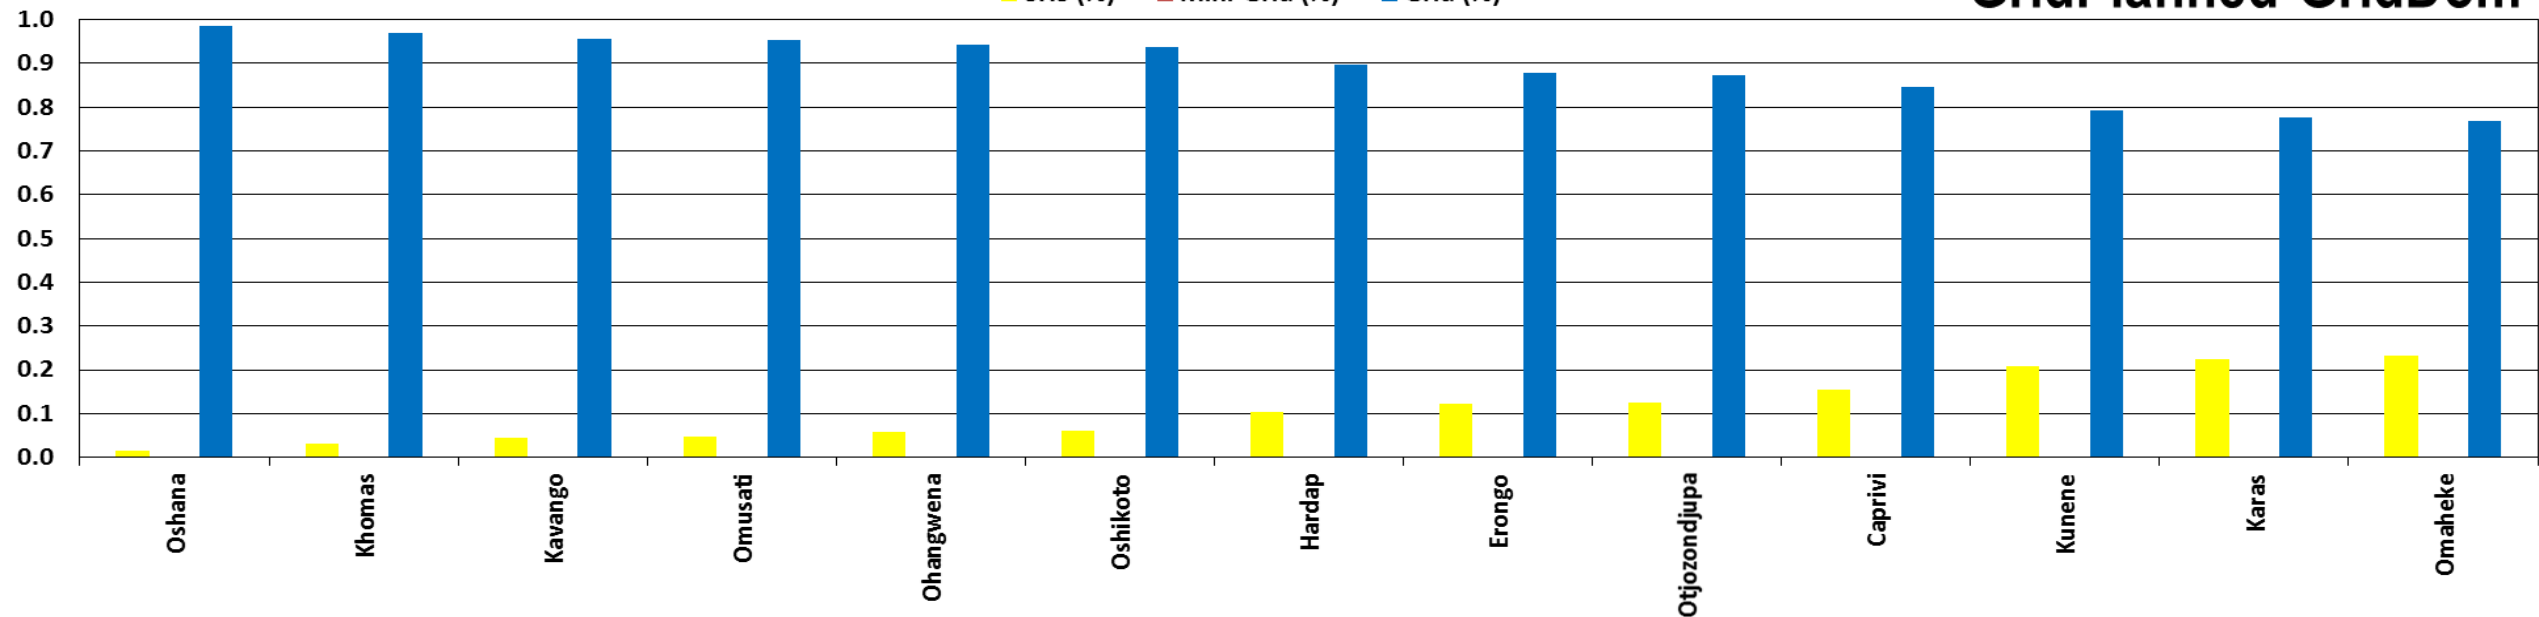

Share of electrification options in all Namibian regions

SHS (%) Mini-Grid (%) Grid (%)

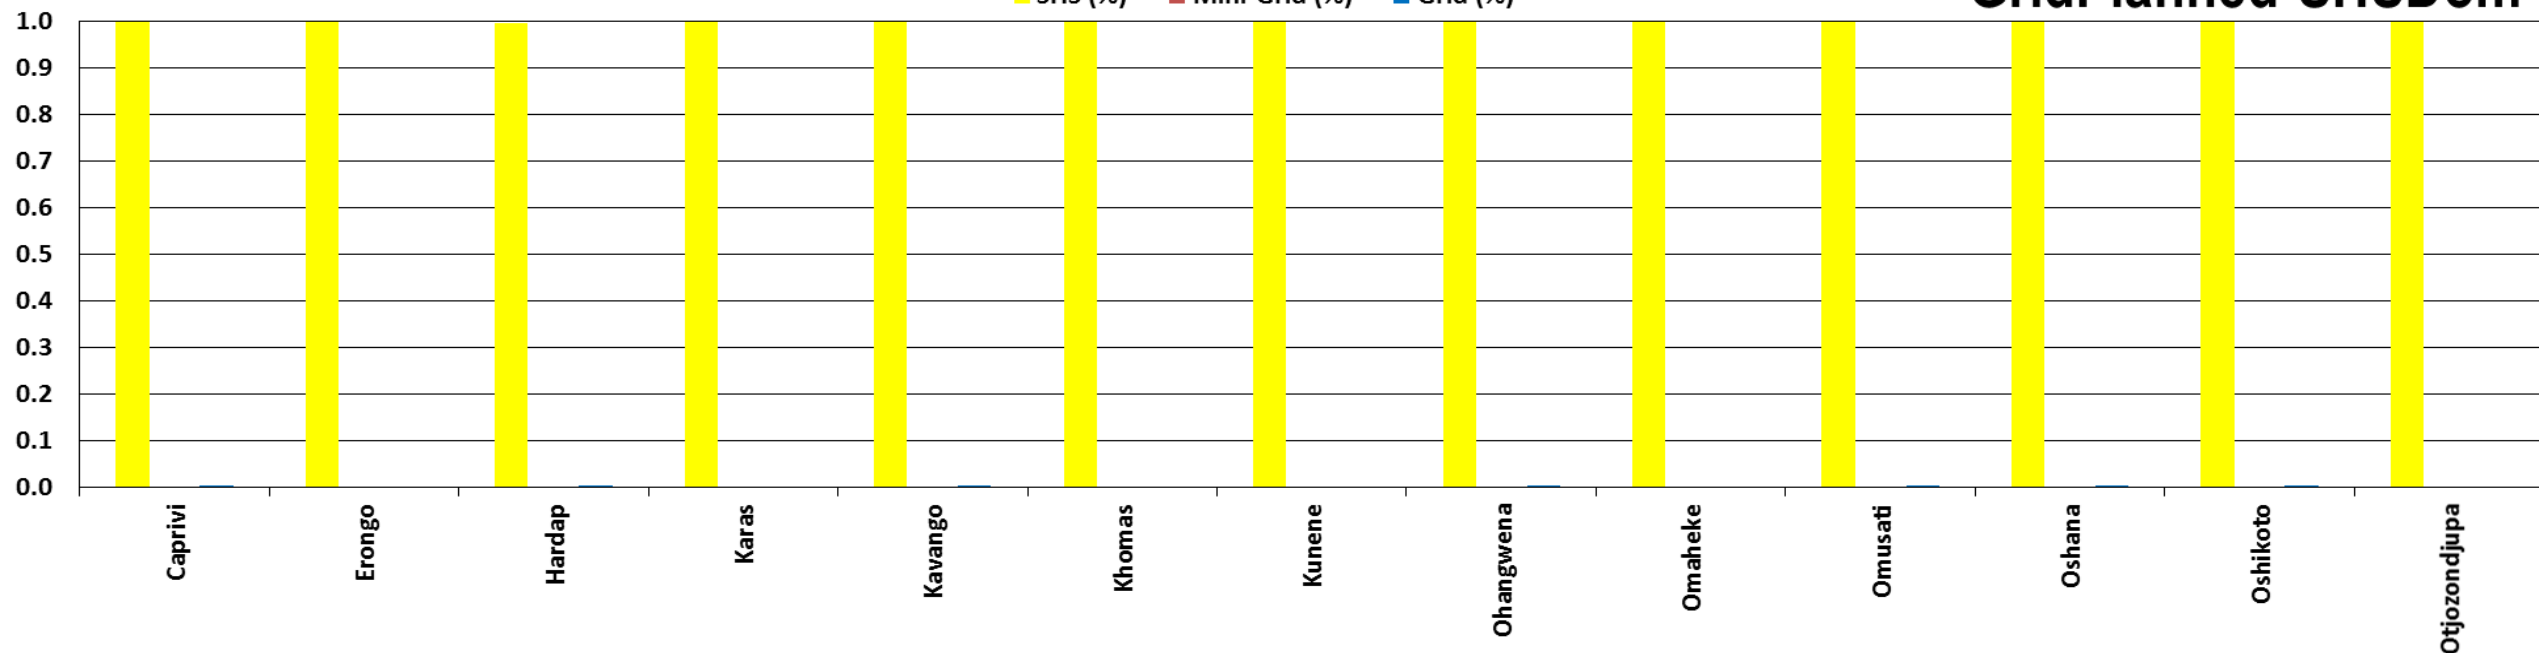

# South Africa

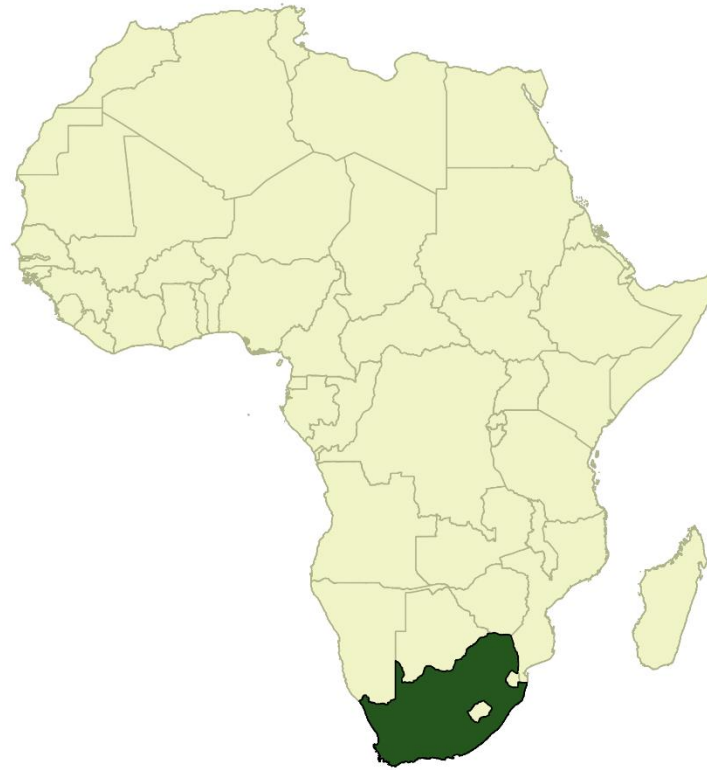

# Night light emission and Population of South African regions

## Night light emission in South Africa

Detected night lights

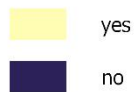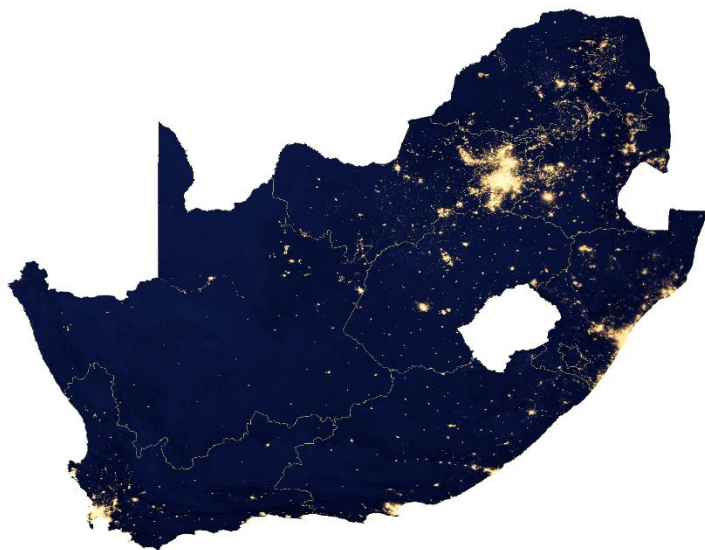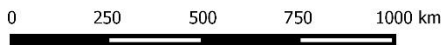

## Population structure of South Africa

Population density (people/750x750m<sup>2</sup>)

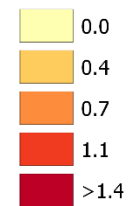

River and Lake (blue)

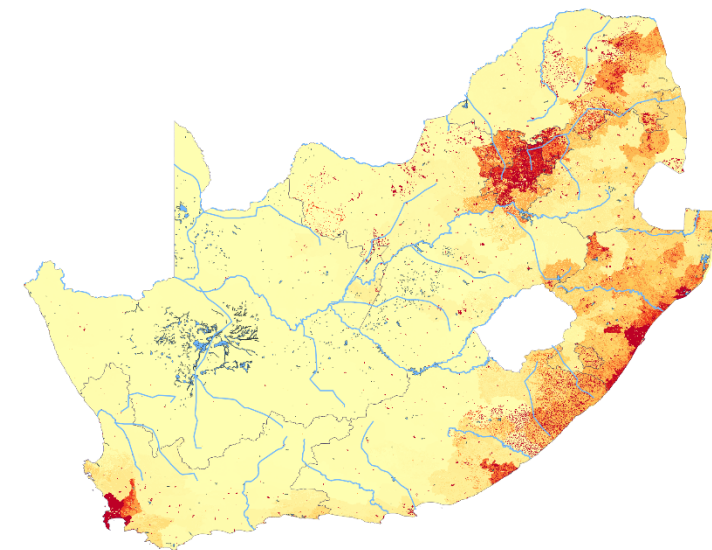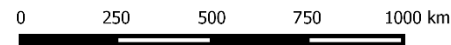

# Electrification option in all South African regions: GridBuilt-GridDom

## Electrification options of South African regions

Electrification option

- Solar Home System
- Mini-Grid
- Grid Extension

River and Lake

0 250 500 750 1000 km

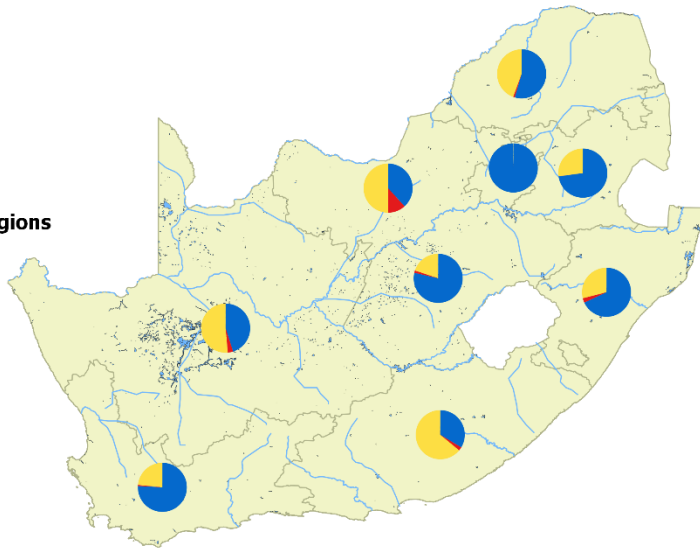

## Electrification options of South African regions

Electrification option

- Solar Home System
- Mini-Grid
- Grid Extension

Grid Buffer (diameter)

- 50 km
- Power Grid
- River and Lake

0 250 500 750 1000 km

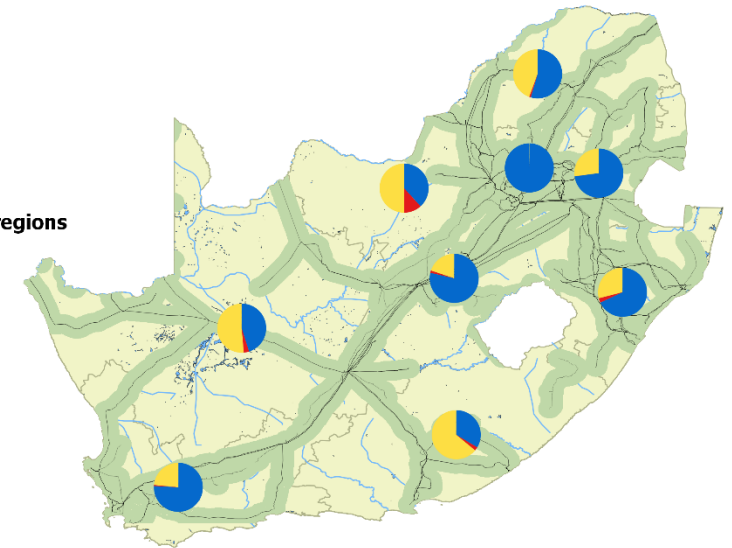

# Electrification option in all South African regions: GridBuilt-SHSDom

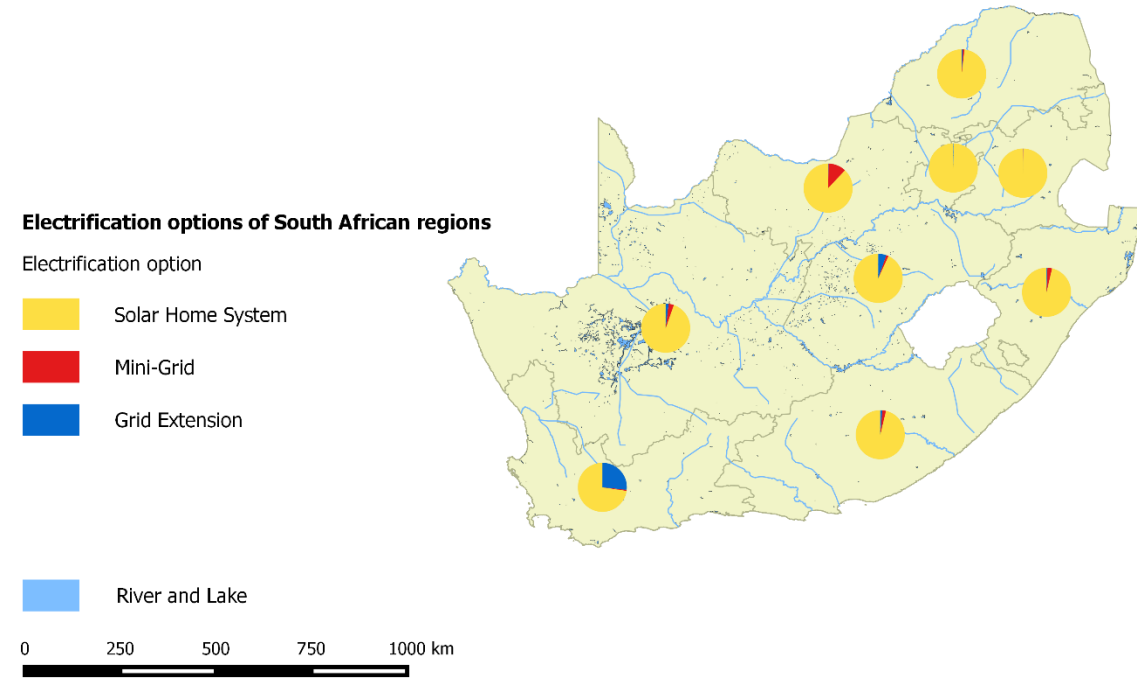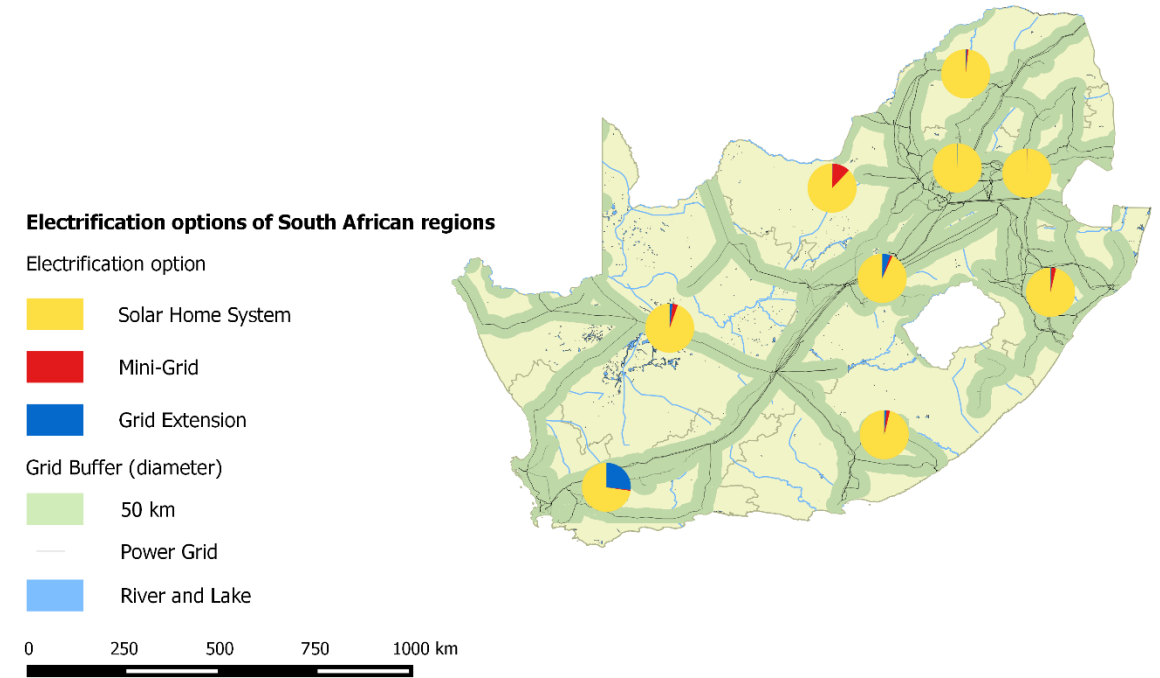

# Electrification option: GridBuilt-SHSDom

Electrification options of South African regions

- Electrification option
- Solar Home System
  - Mini-Grid
  - Grid Extension

- Power Grid
- River and Lake

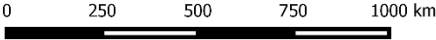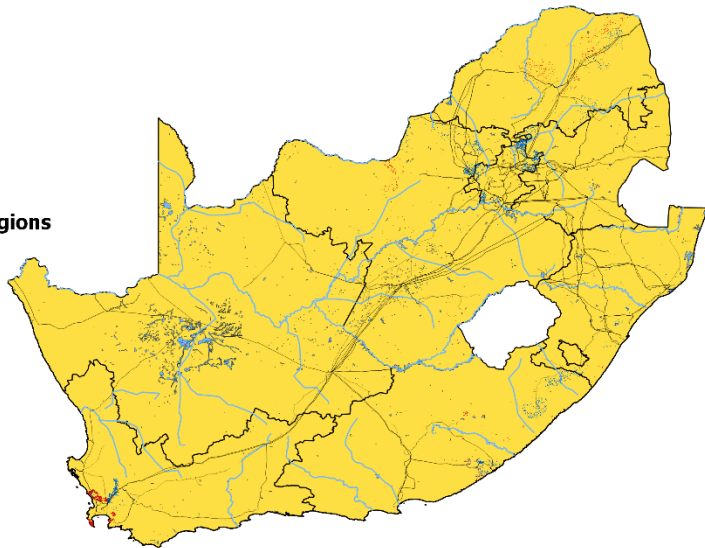

# Electrification option: GridBuilt-GridDom

Electrification options of South African regions

- Electrification option
- Solar Home System
  - Mini-Grid
  - Grid Extension

- Power Grid
- River and Lake

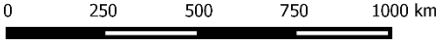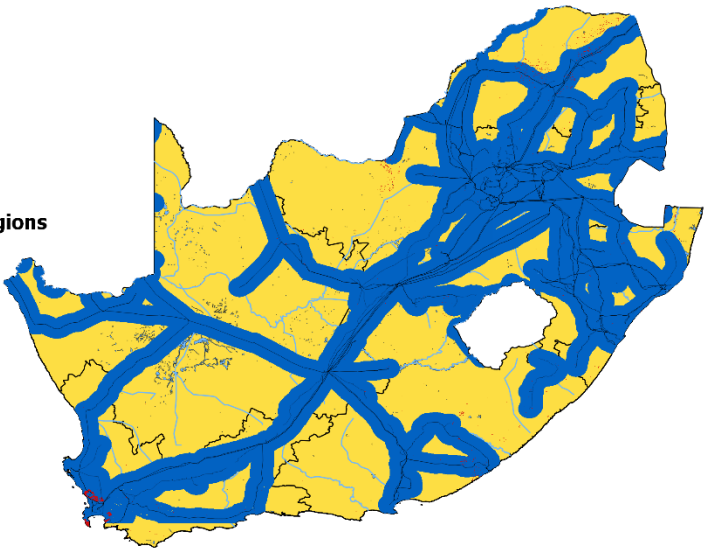

Share of electrification options in all South African regions

GridBuilt-GridDom

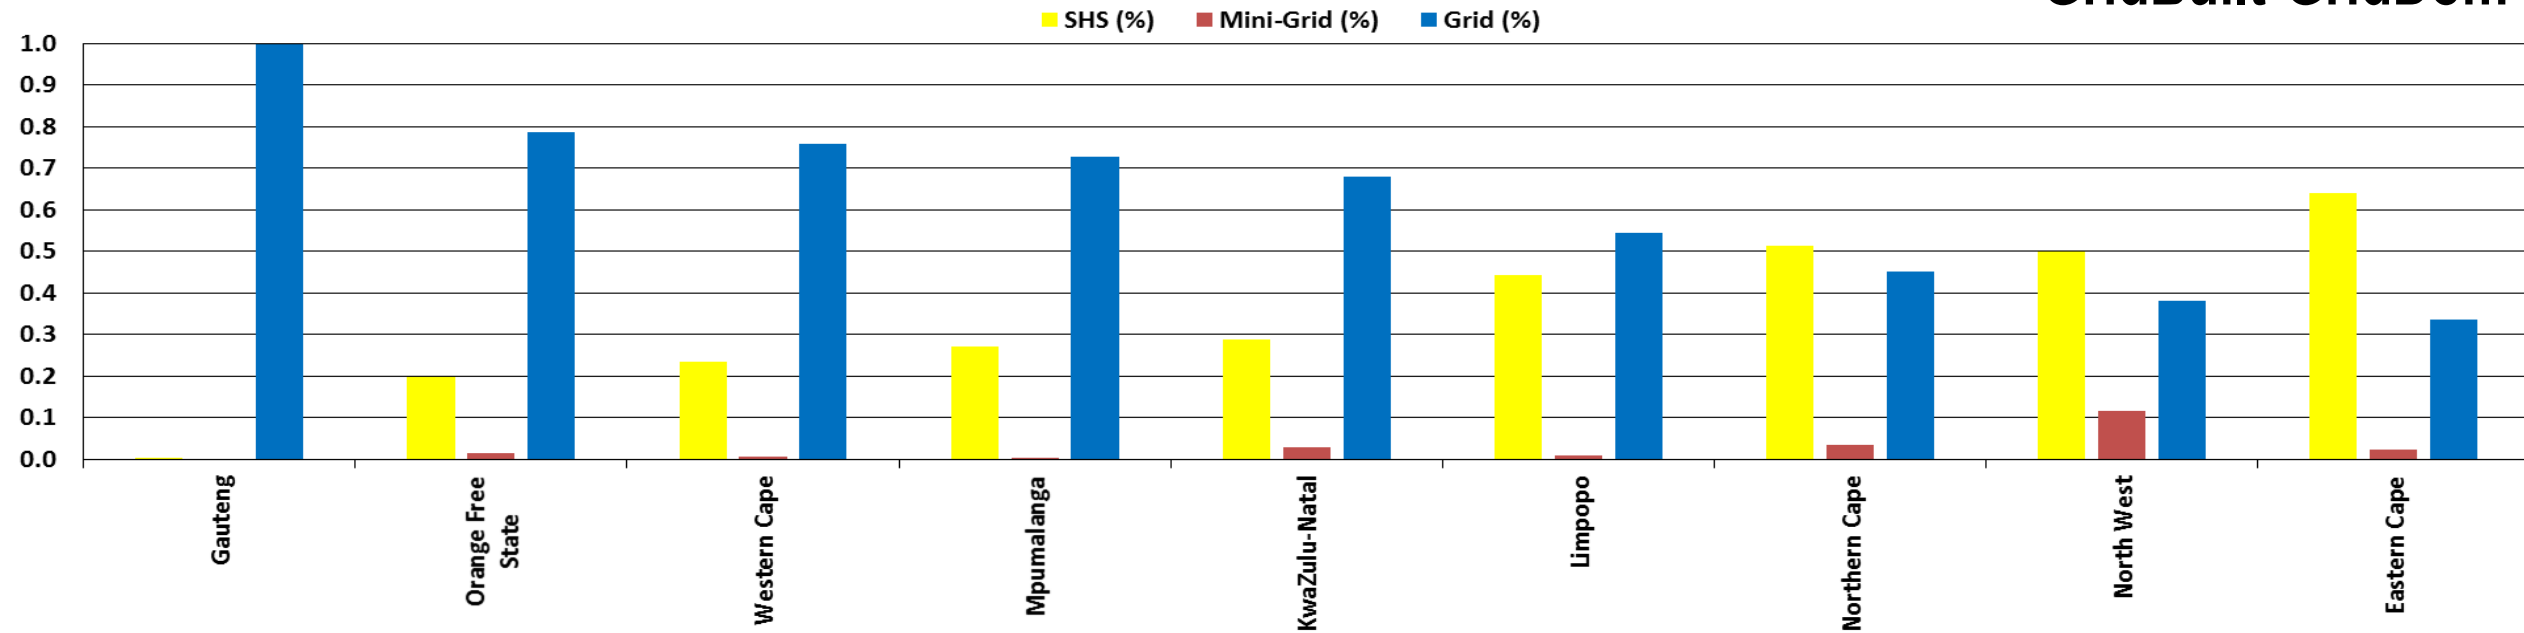

Share of electrification options in all South African regions

GridBuilt-SHSDom

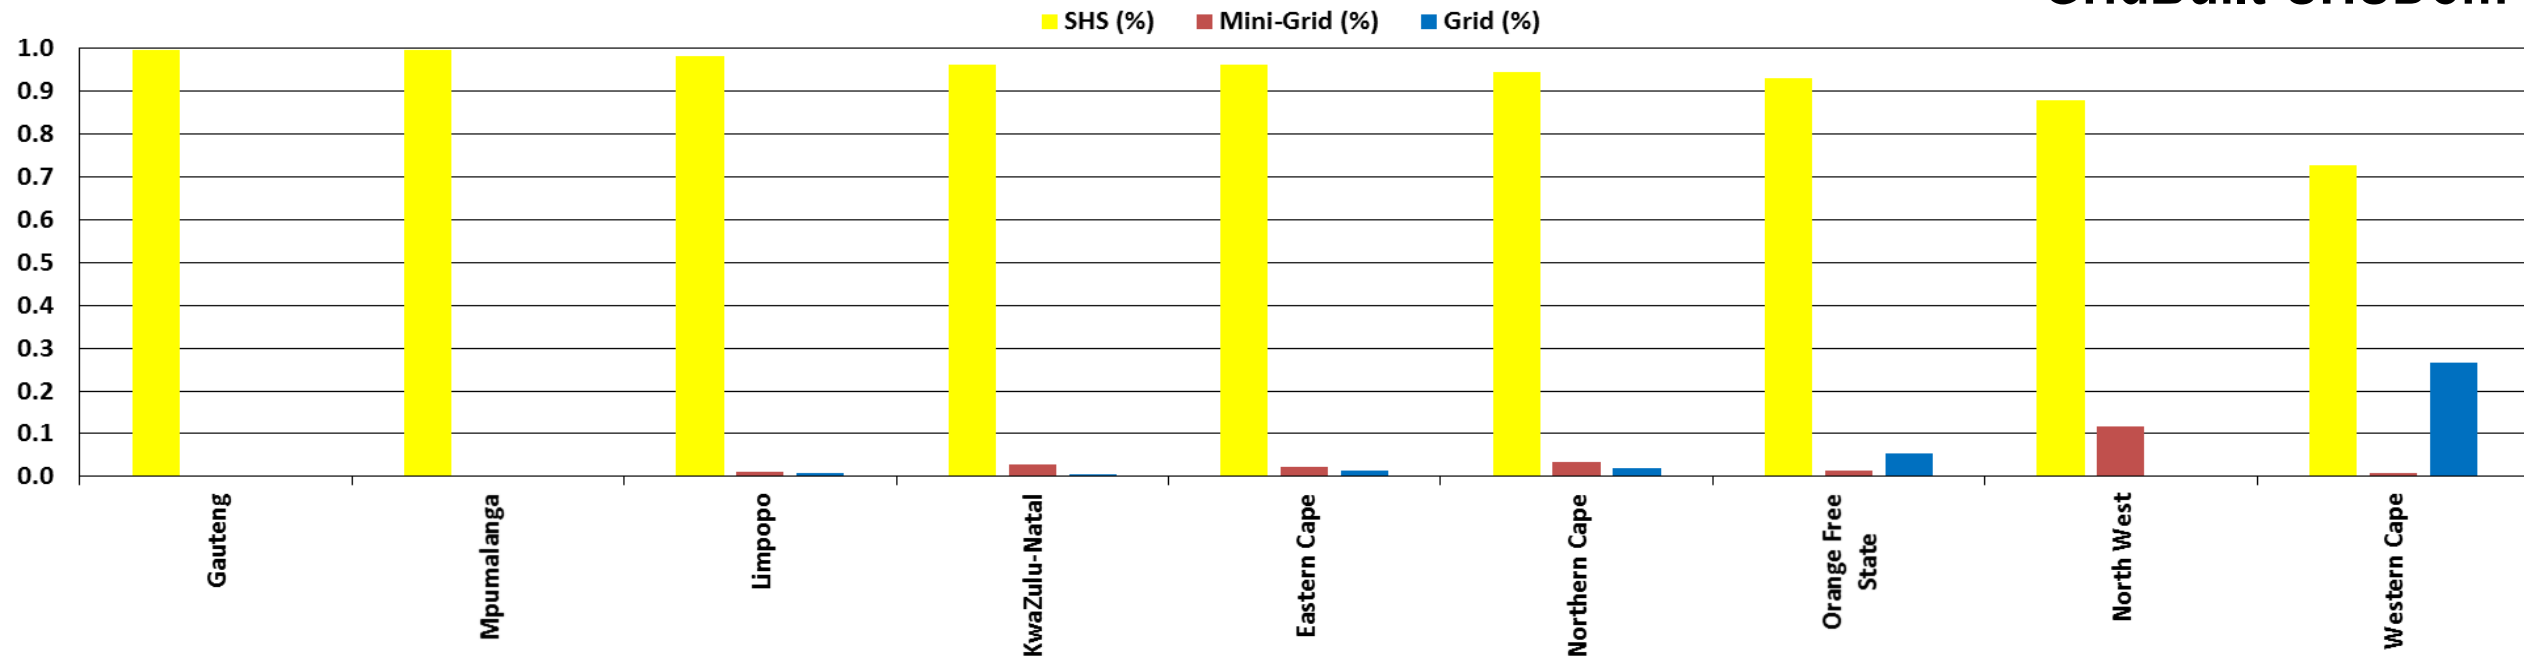

# Electrification option in all South African regions: GridPlanned-GridDom

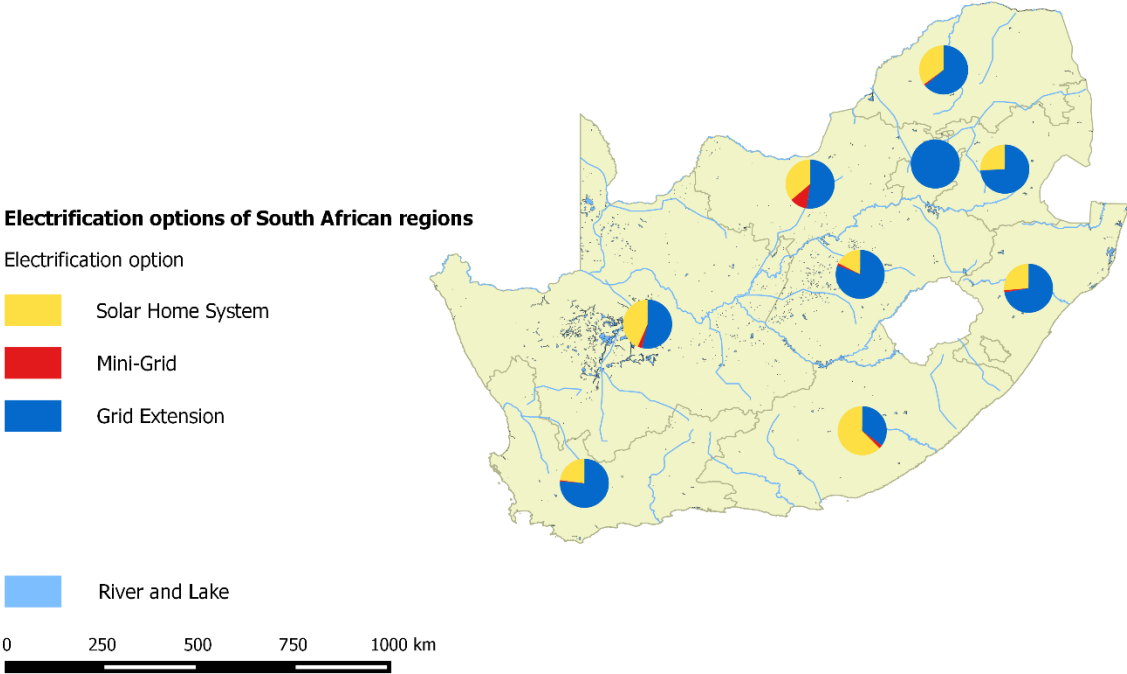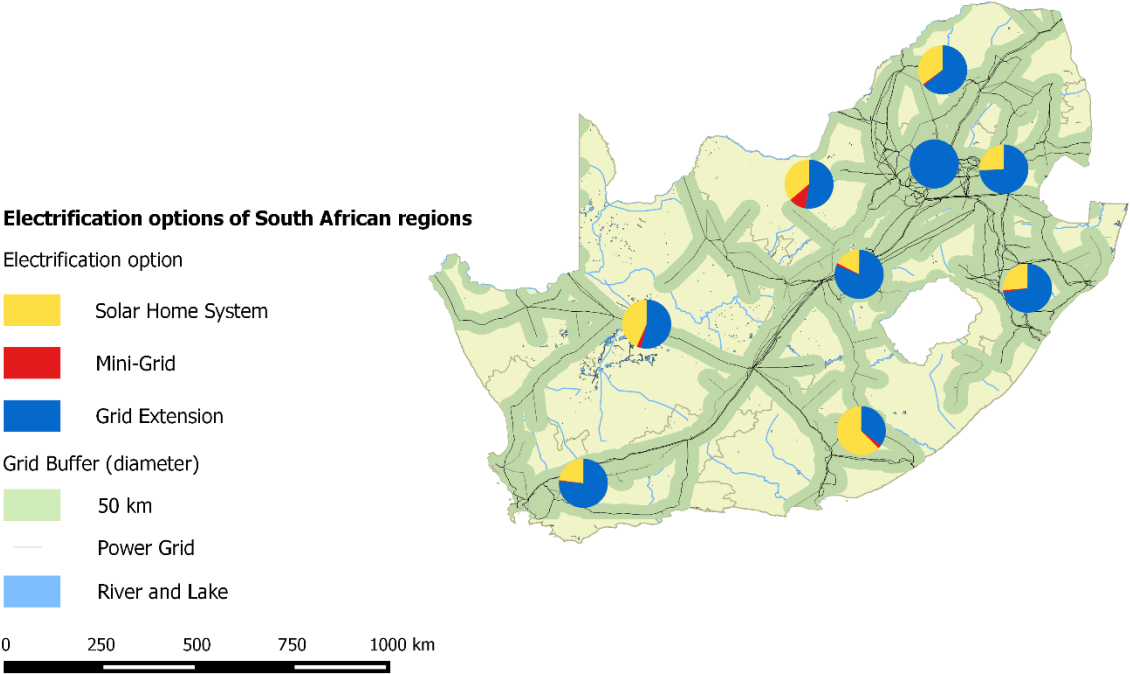

# Electrification option in all South African regions: GridPlanned-SHSDom

## Electrification options of South African regions

- Electrification option
- Solar Home System
  - Mini-Grid
  - Grid Extension

River and Lake

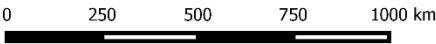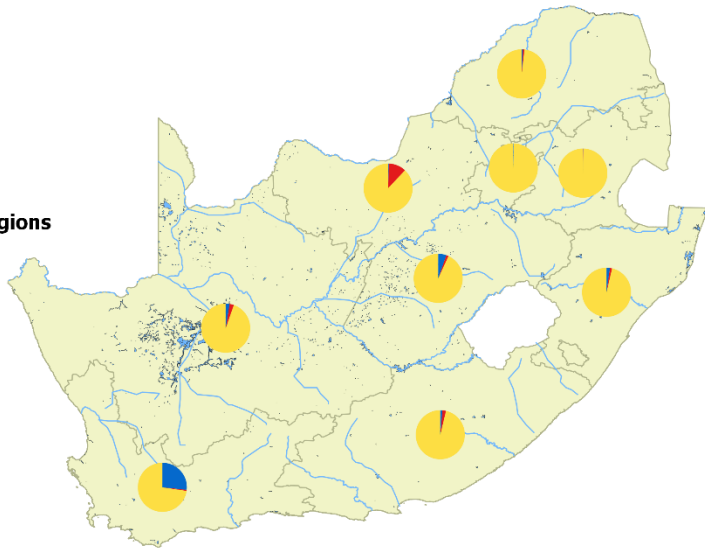

## Electrification options of South African regions

- Electrification option
- Solar Home System
  - Mini-Grid
  - Grid Extension

Grid Buffer (diameter)

- 50 km
- Power Grid
- River and Lake

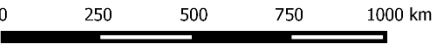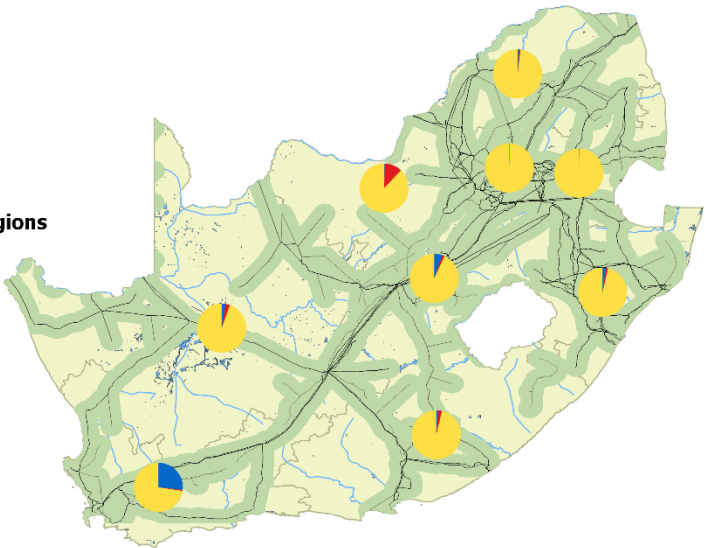

# Electrification option: GridPlanned-SHSDom

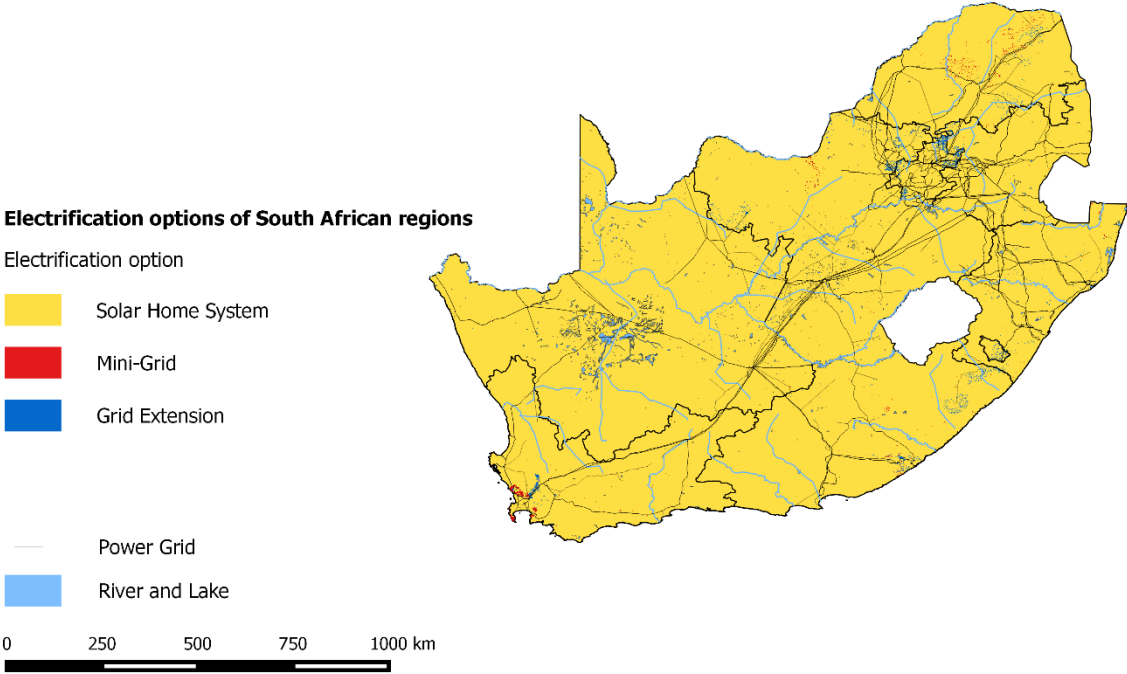

# Electrification option: GridPlanned-GridDom

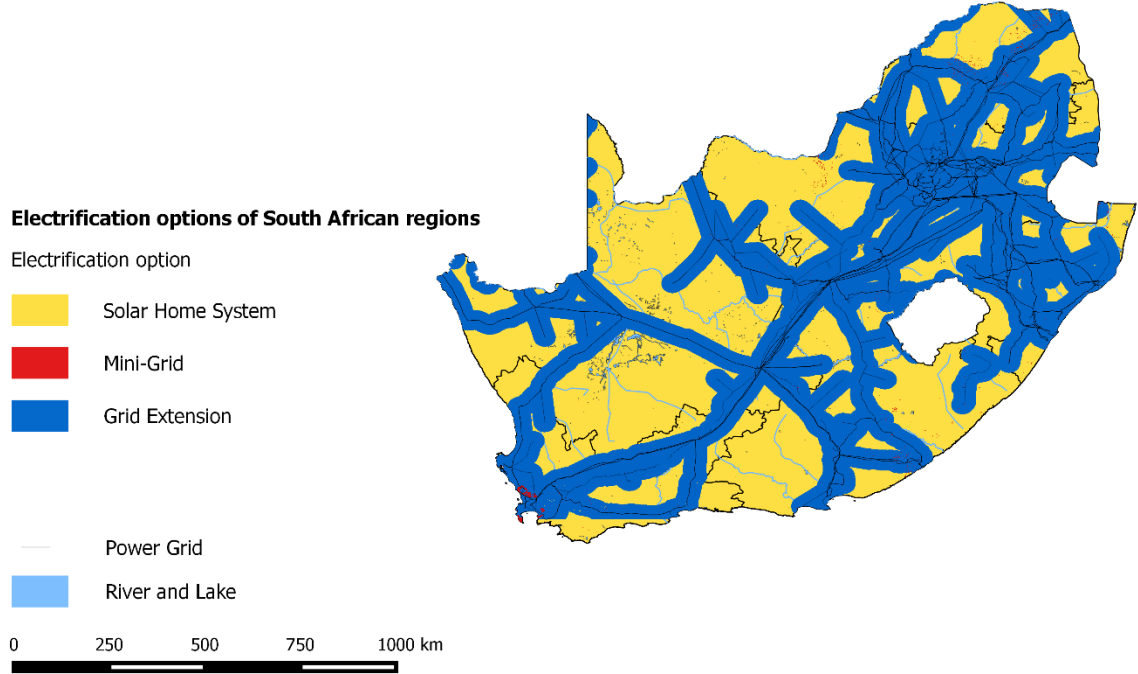

Share of electrification options in all South African regions

GridPlanned-GridDom

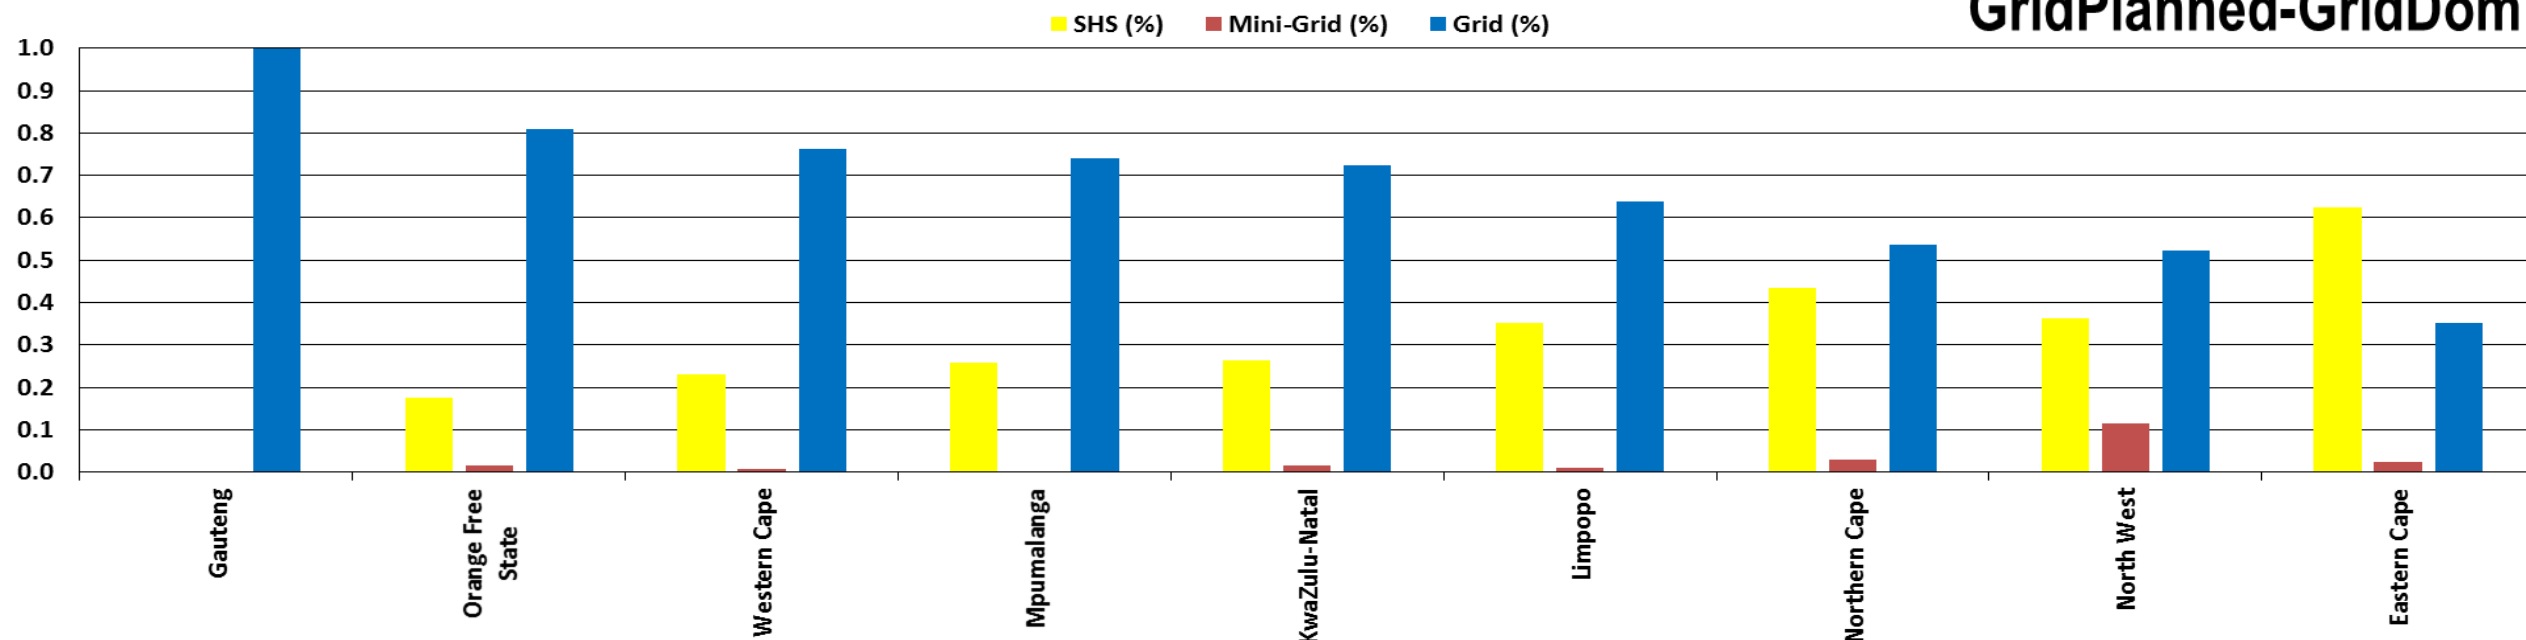

Share of electrification options in all South African regions

GridPlanned-SHSDom

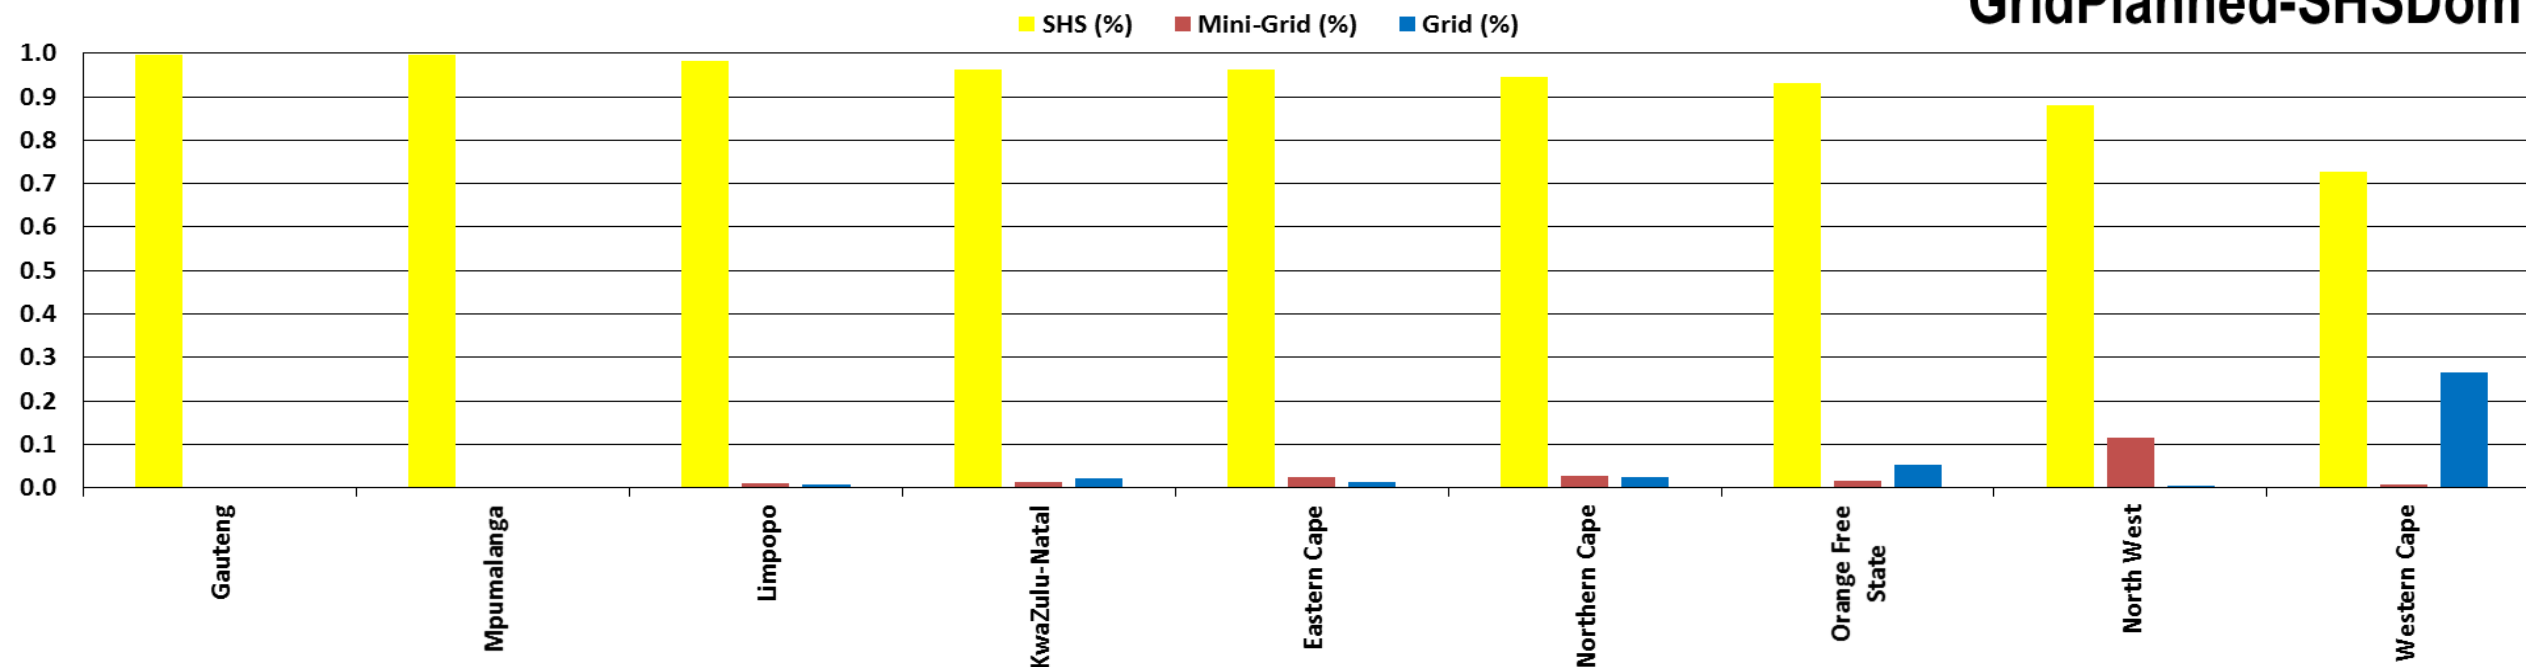

# Swaziland

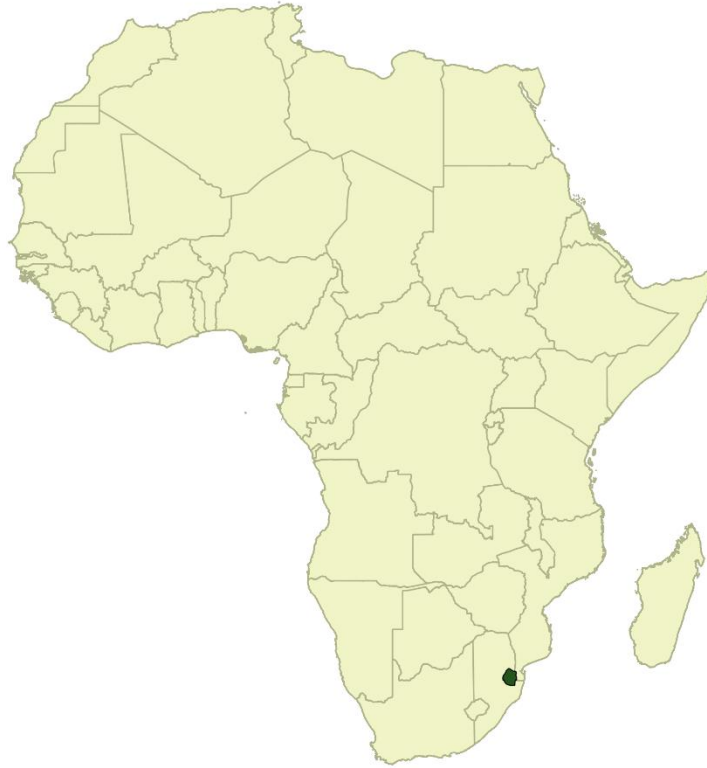

# Night light emission and Population of Swazi regions

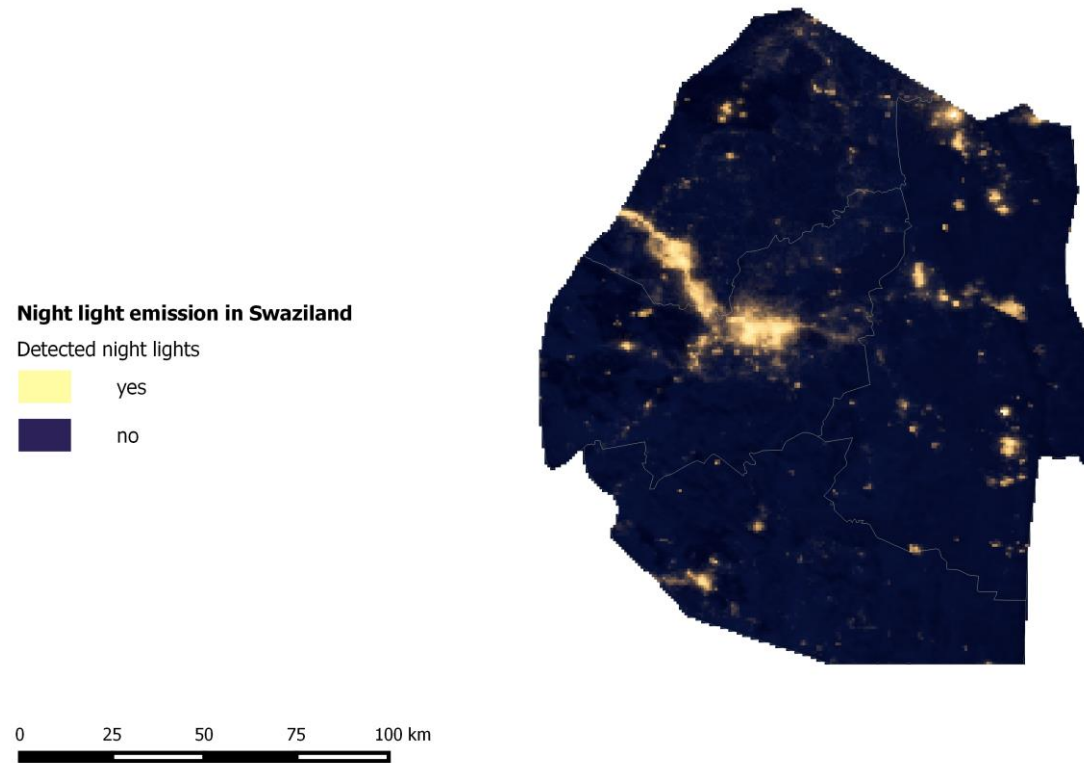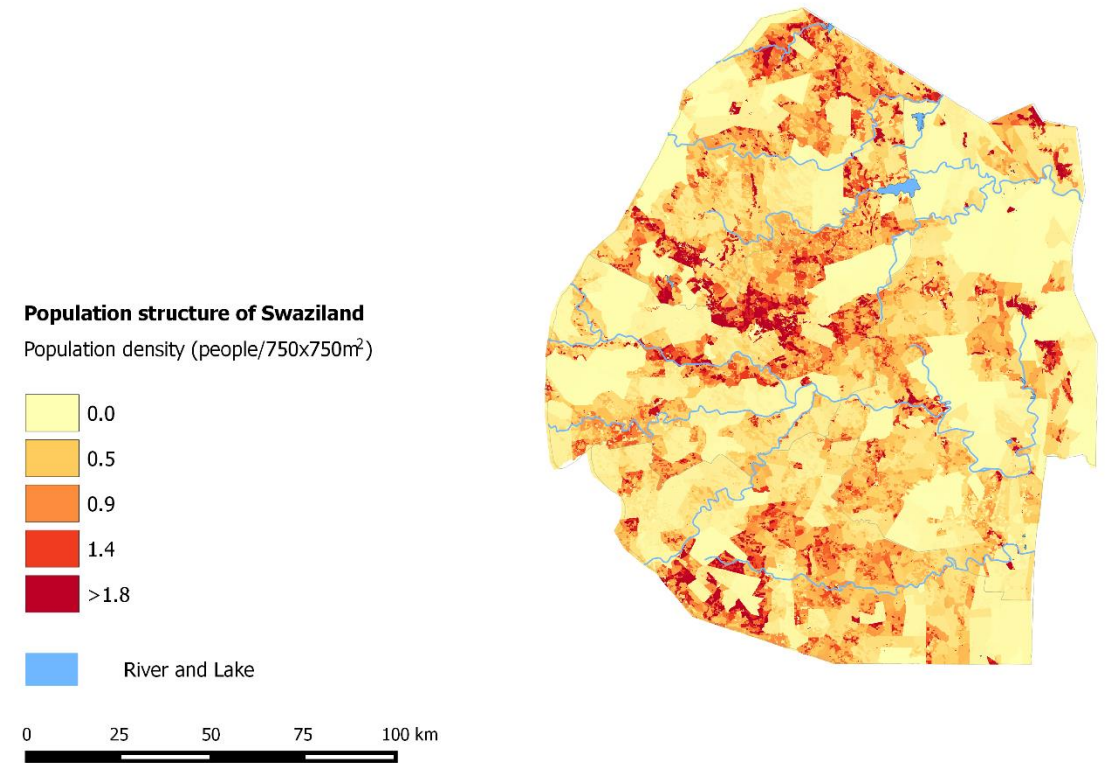

# Electrification option in all Swazi regions: GridBuilt-GridDom

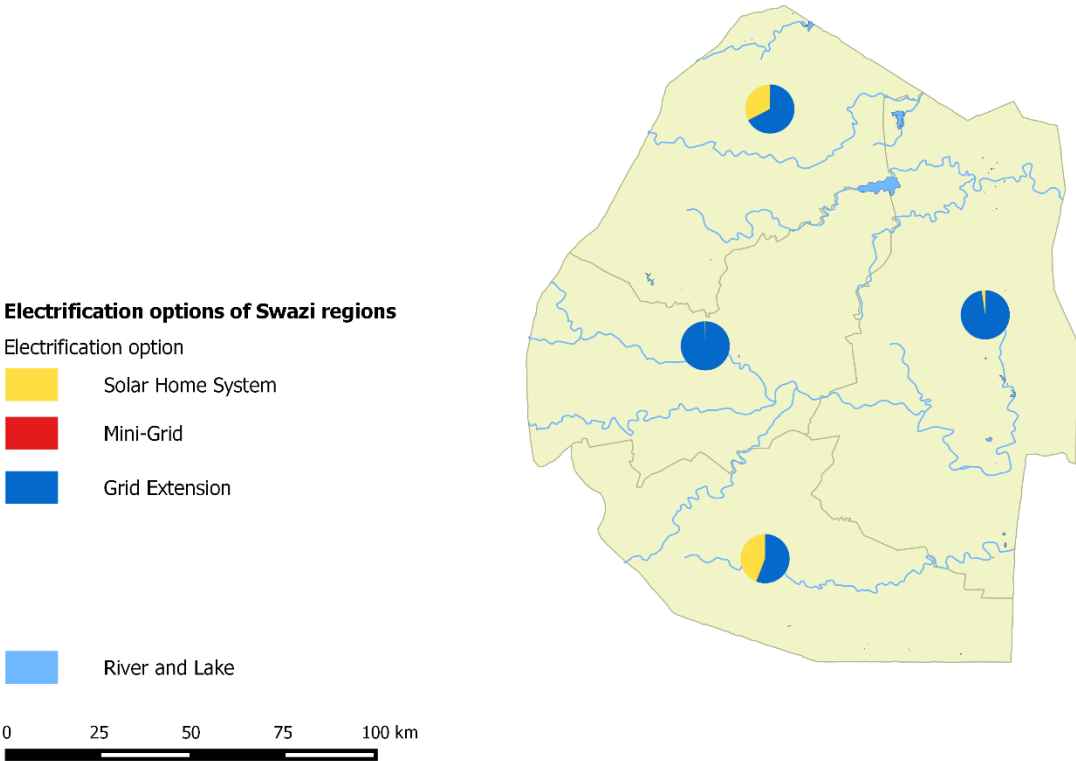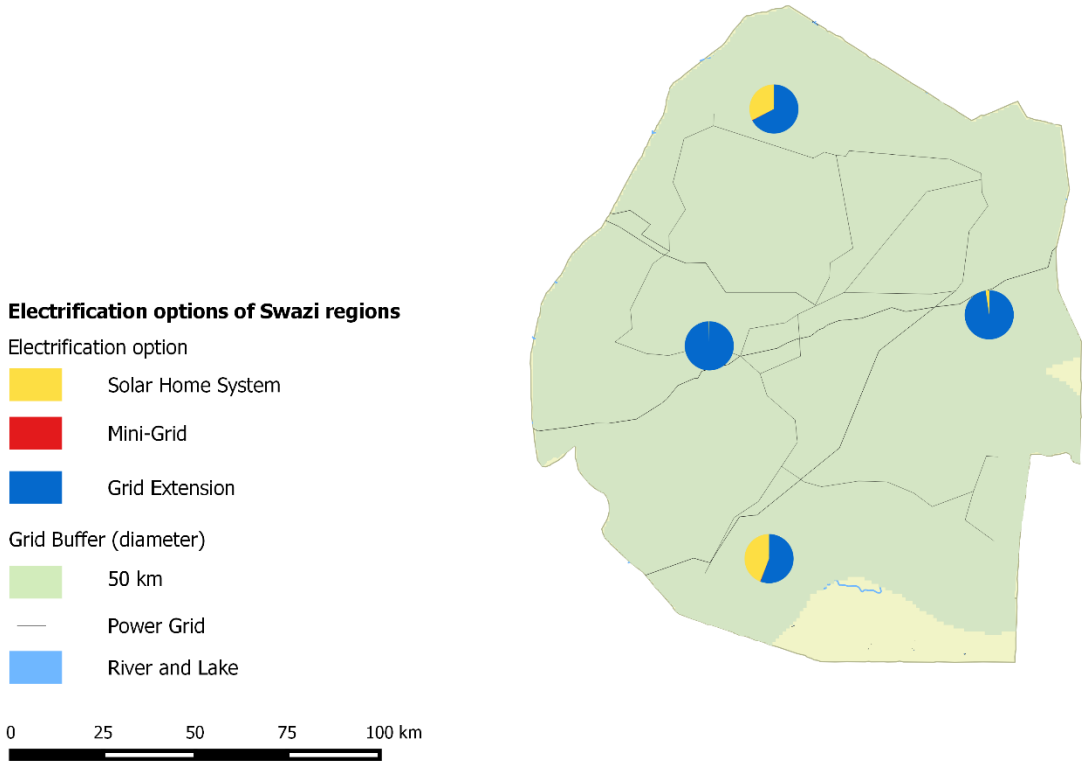

# Electrification option in all Swazi regions: GridBuilt-SHSDom

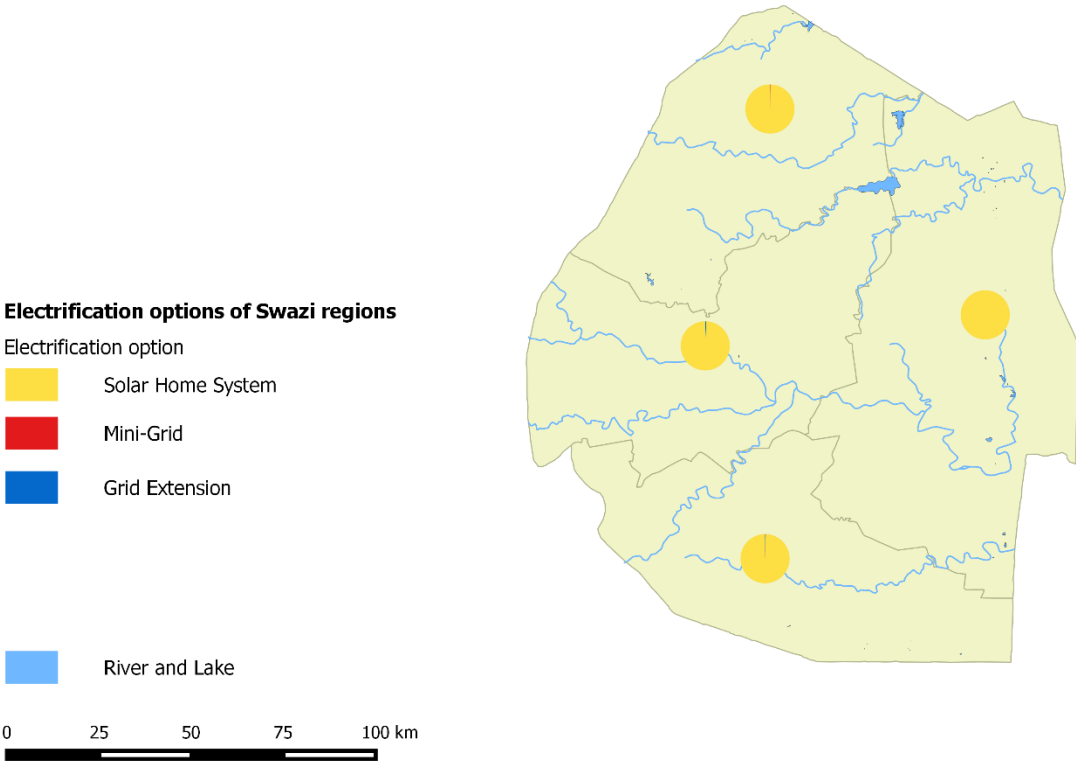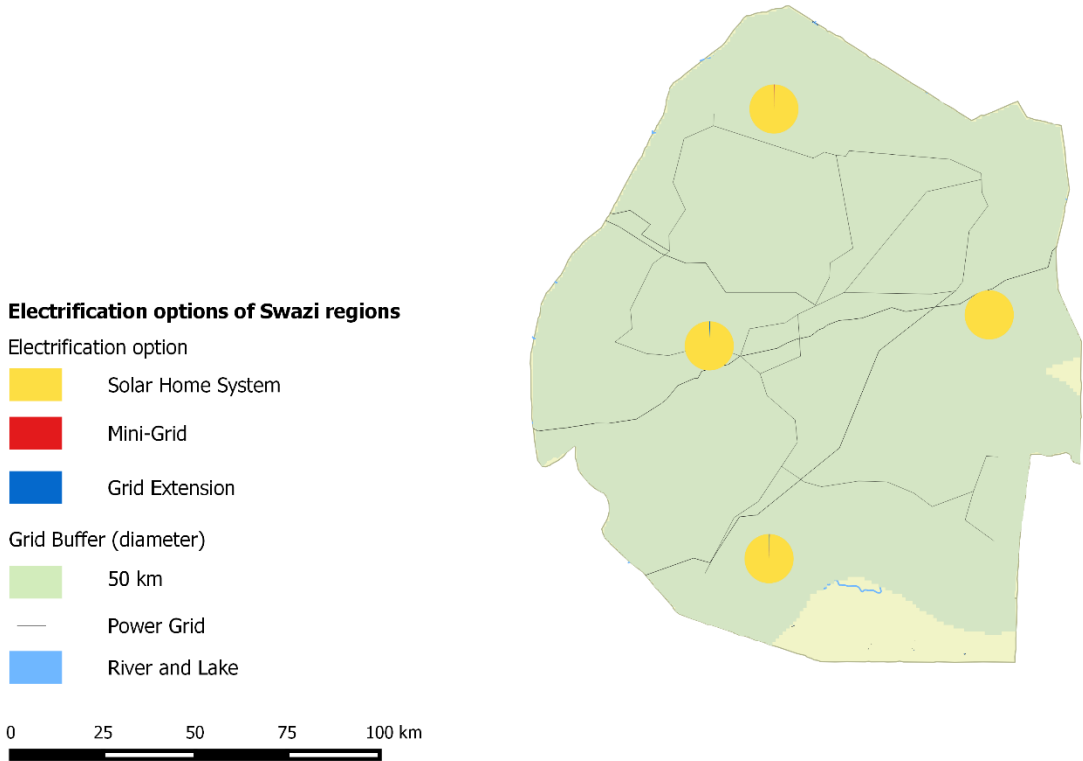

# Electrification option: GridBuilt-SHSDom

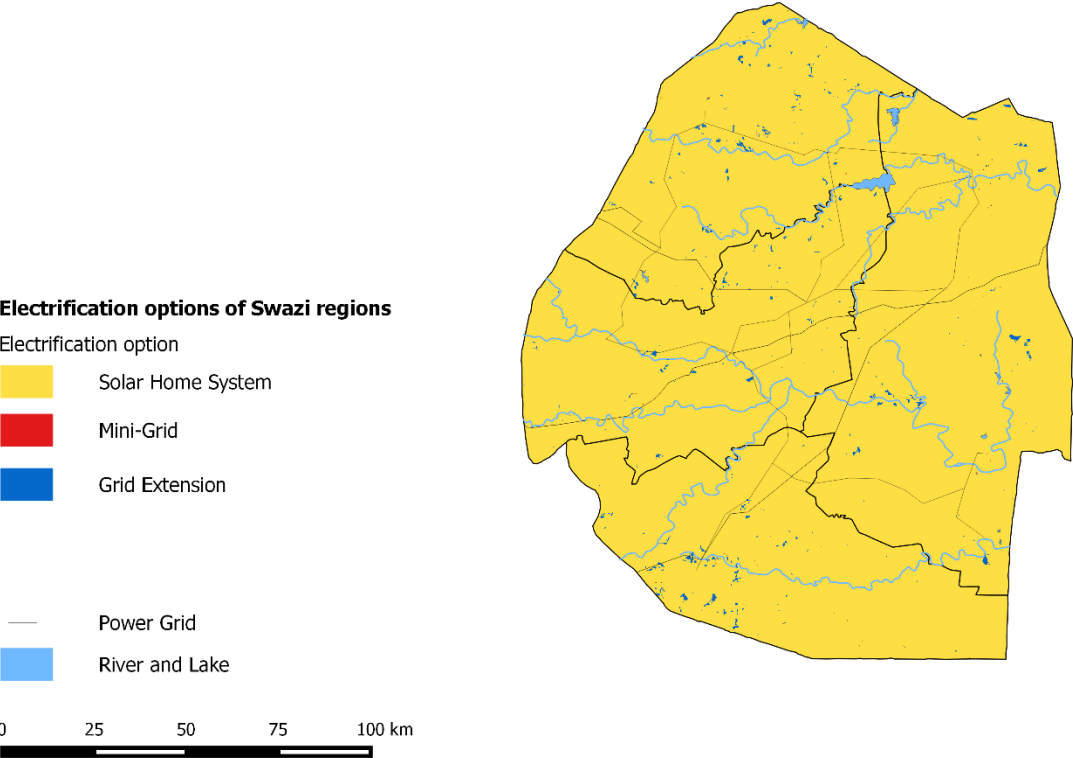

# Electrification option: GridBuilt-GridDom

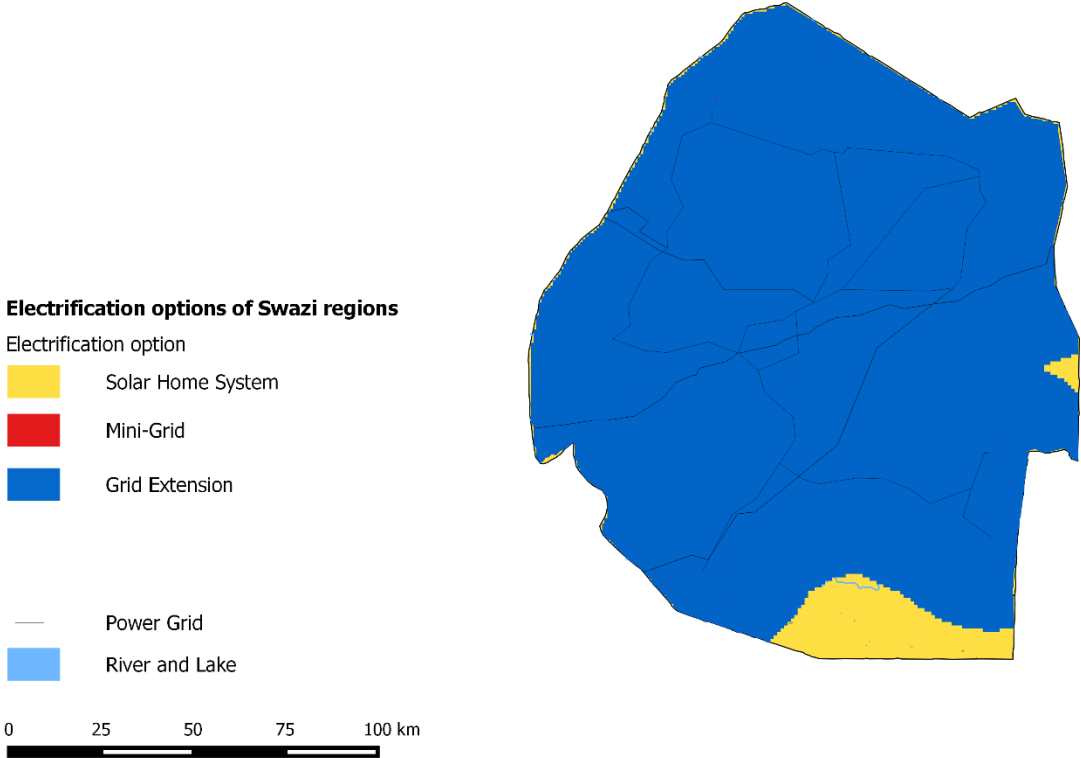

Share of electrification options in all Swazi regions

SHS (%) Mini-Grid (%) Grid (%)

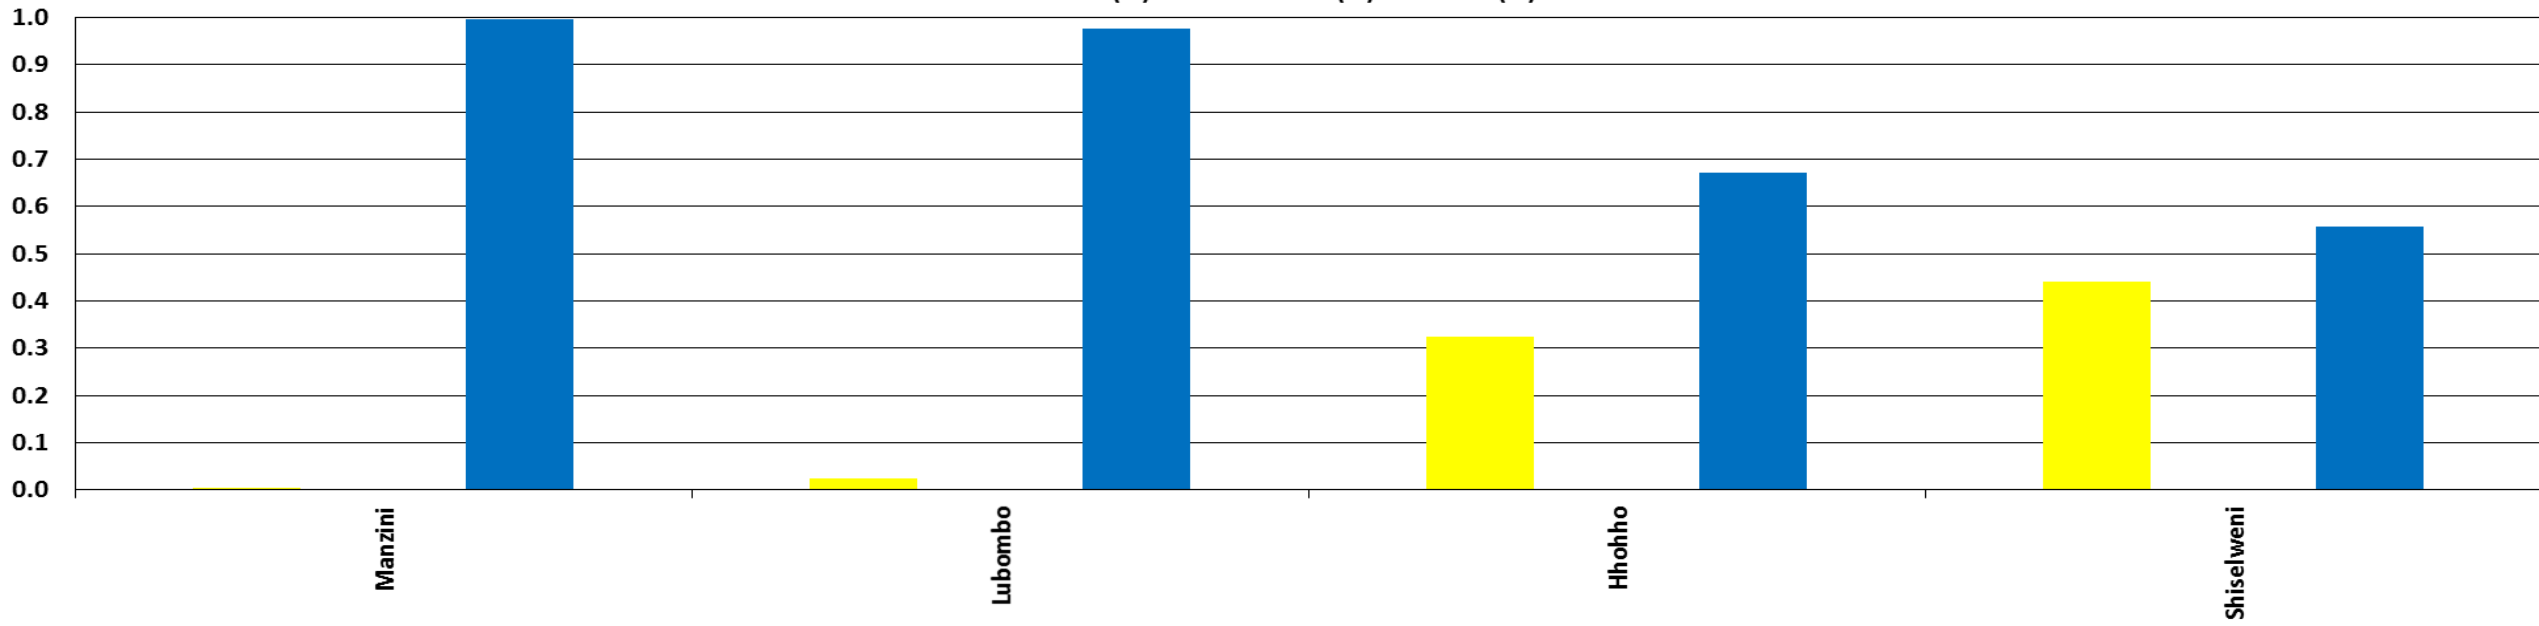

Share of electrification options in all Swazi regions

SHS (%) Mini-Grid (%) Grid (%)

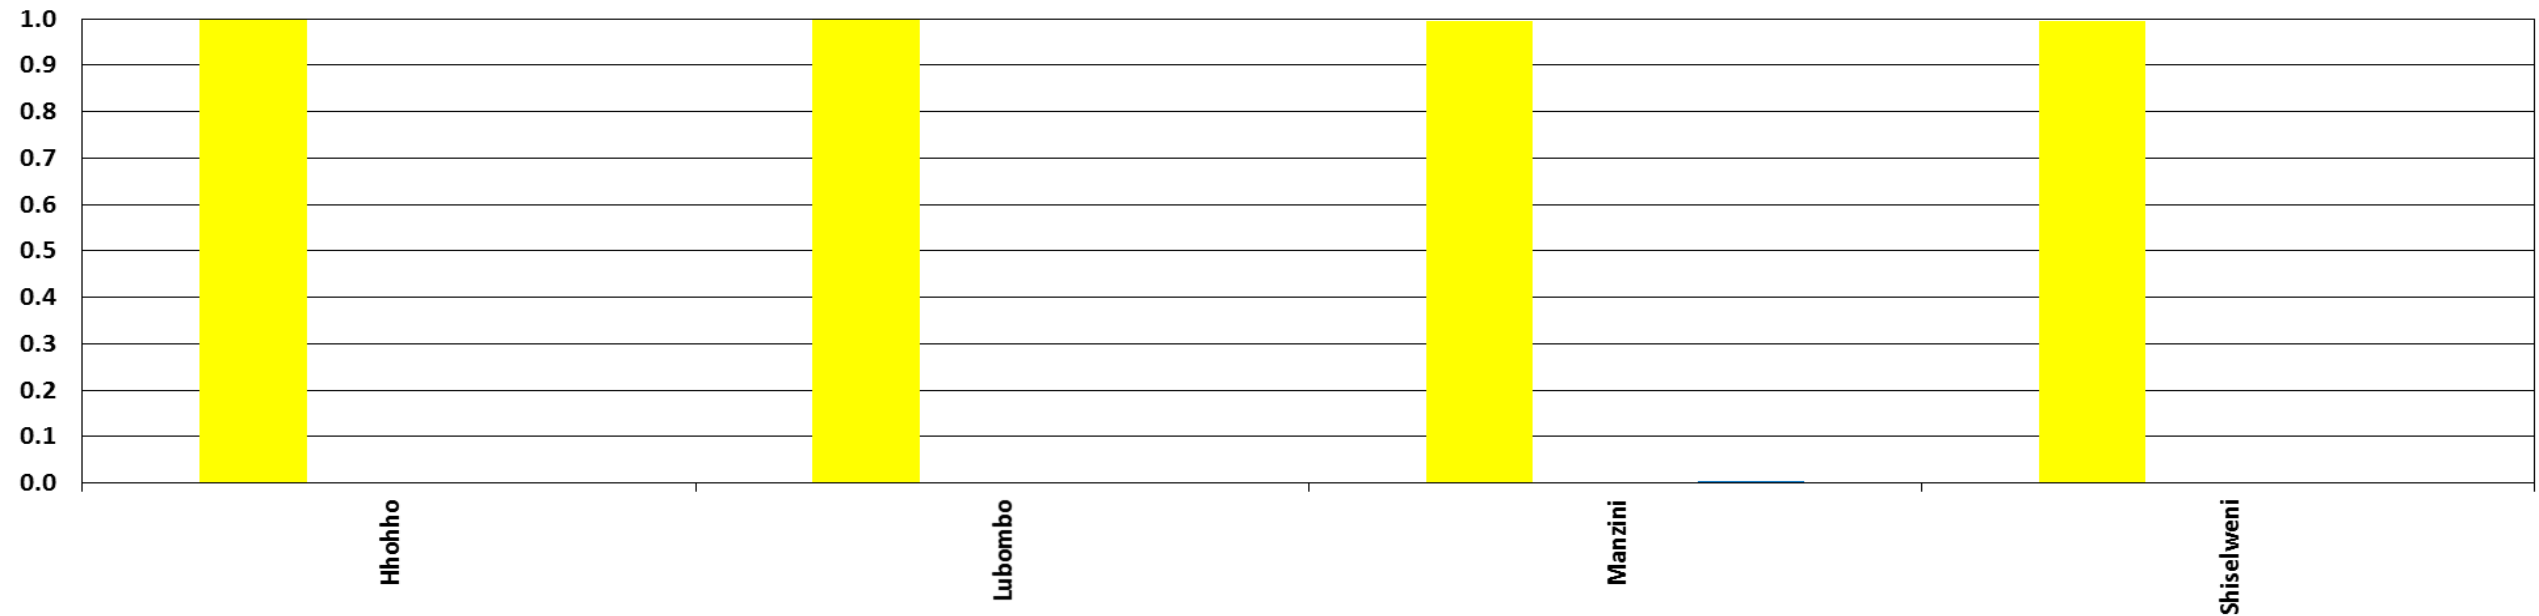

# Electrification option in all Swazi regions: GridPlanned-GridDom

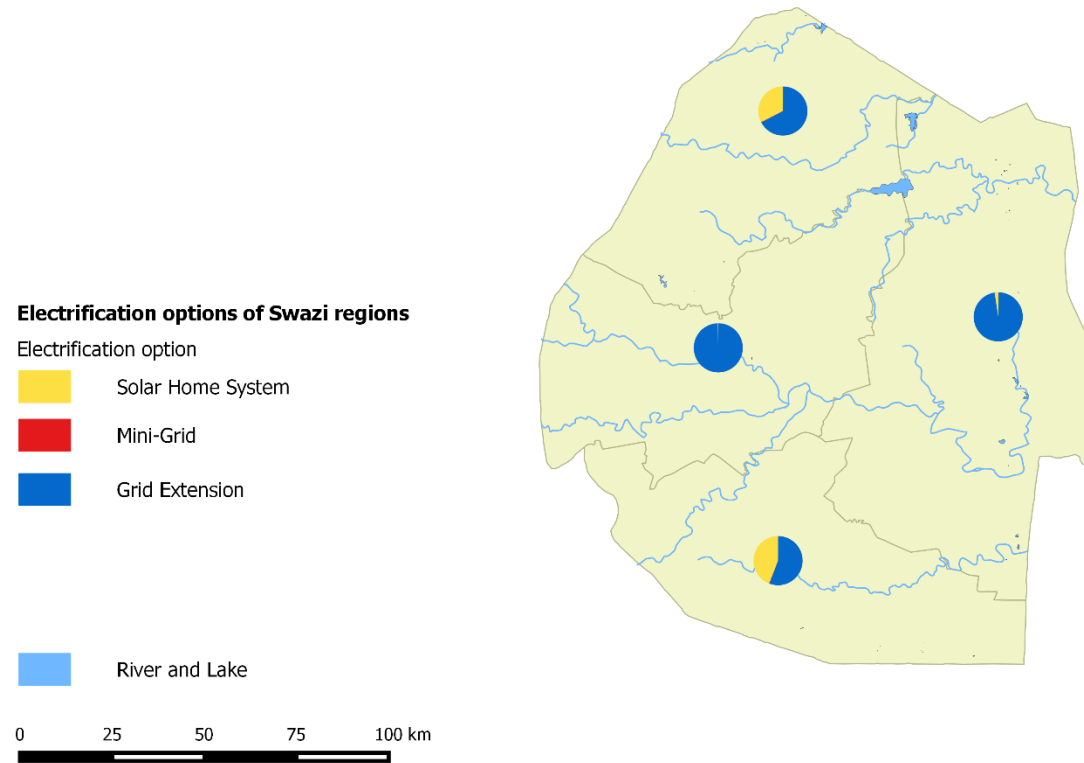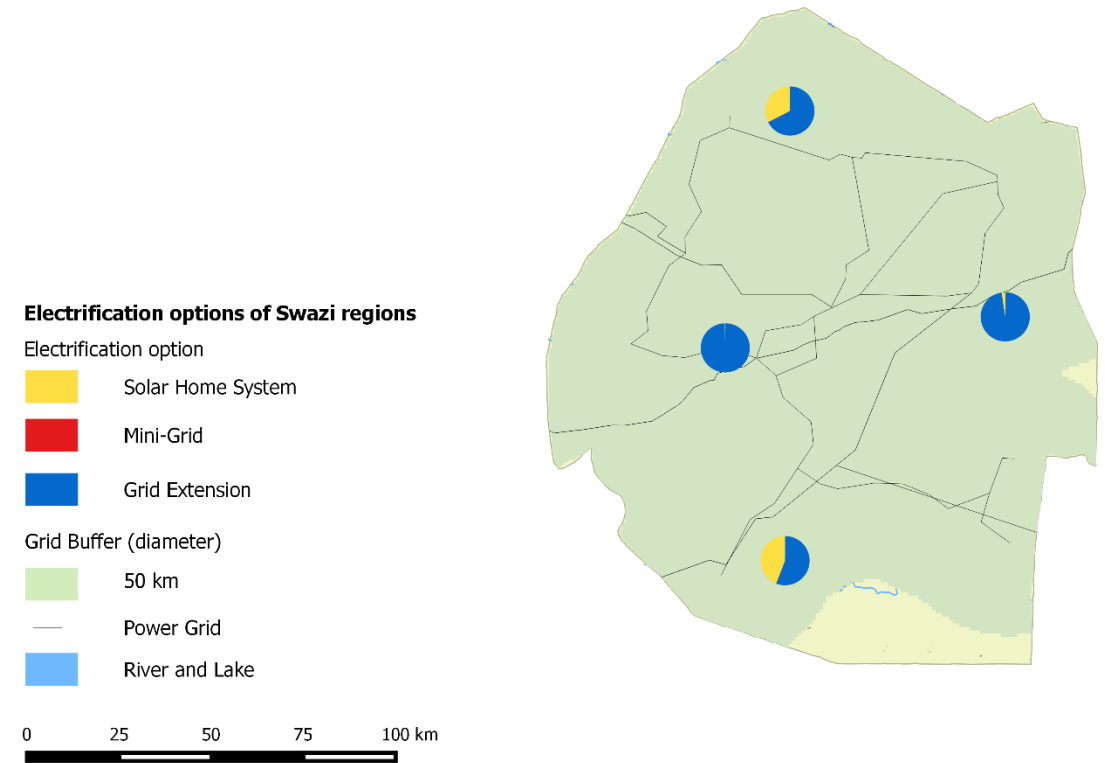

# Electrification option in all Swazi regions: GridPlanned-SHSDom

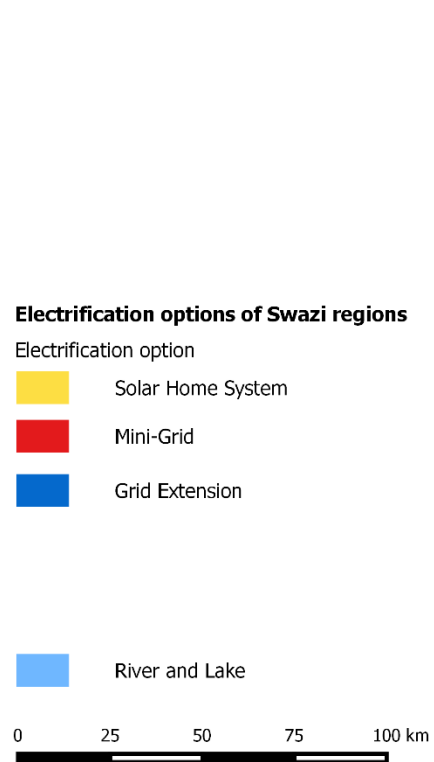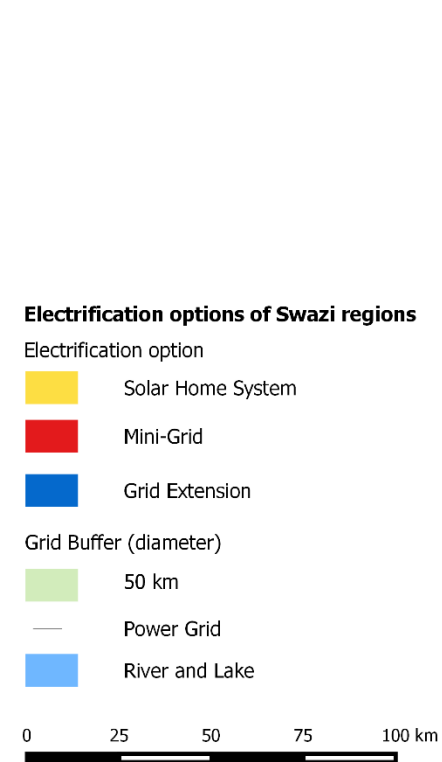

# Electrification option: GridPlanned-SHSDom

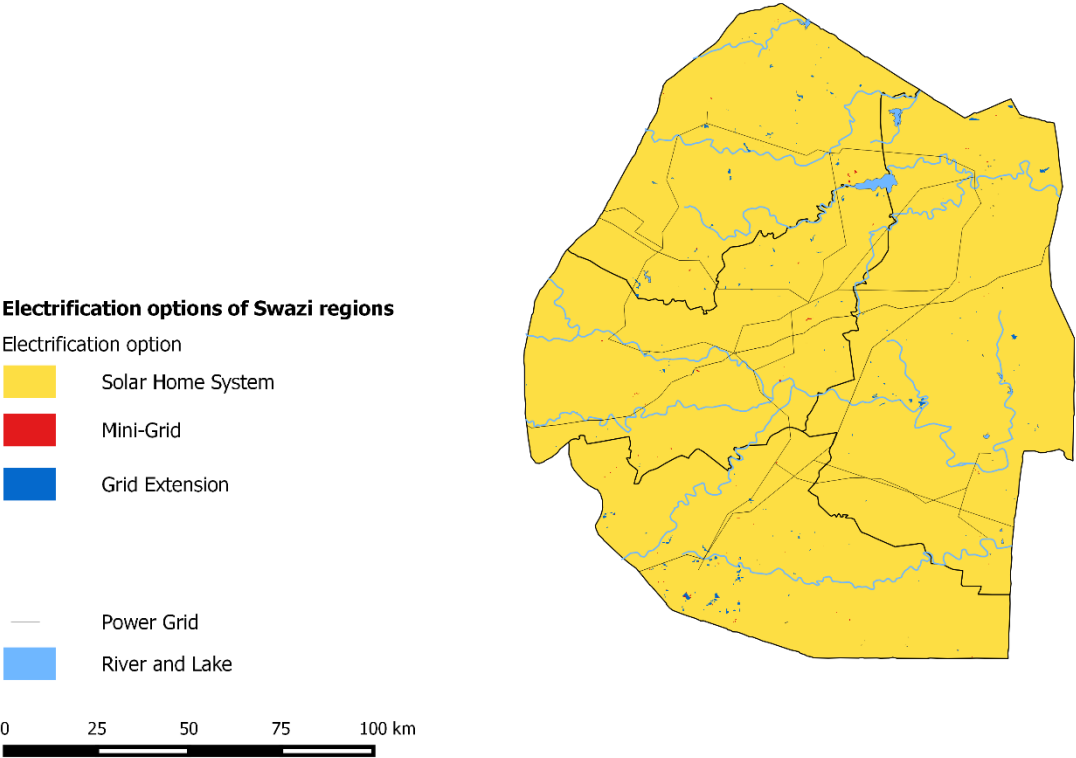

# Electrification option: GridPlanned-GridDom

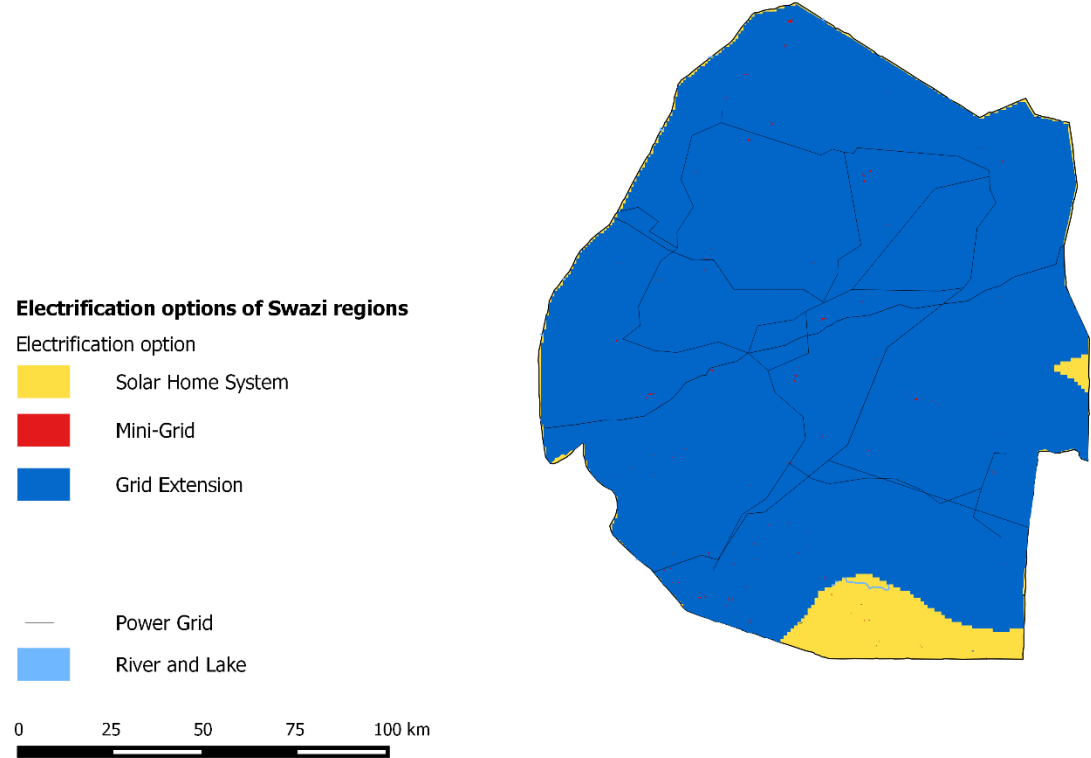

Share of electrification options in all Swazi regions

GridPlanned-GridDom

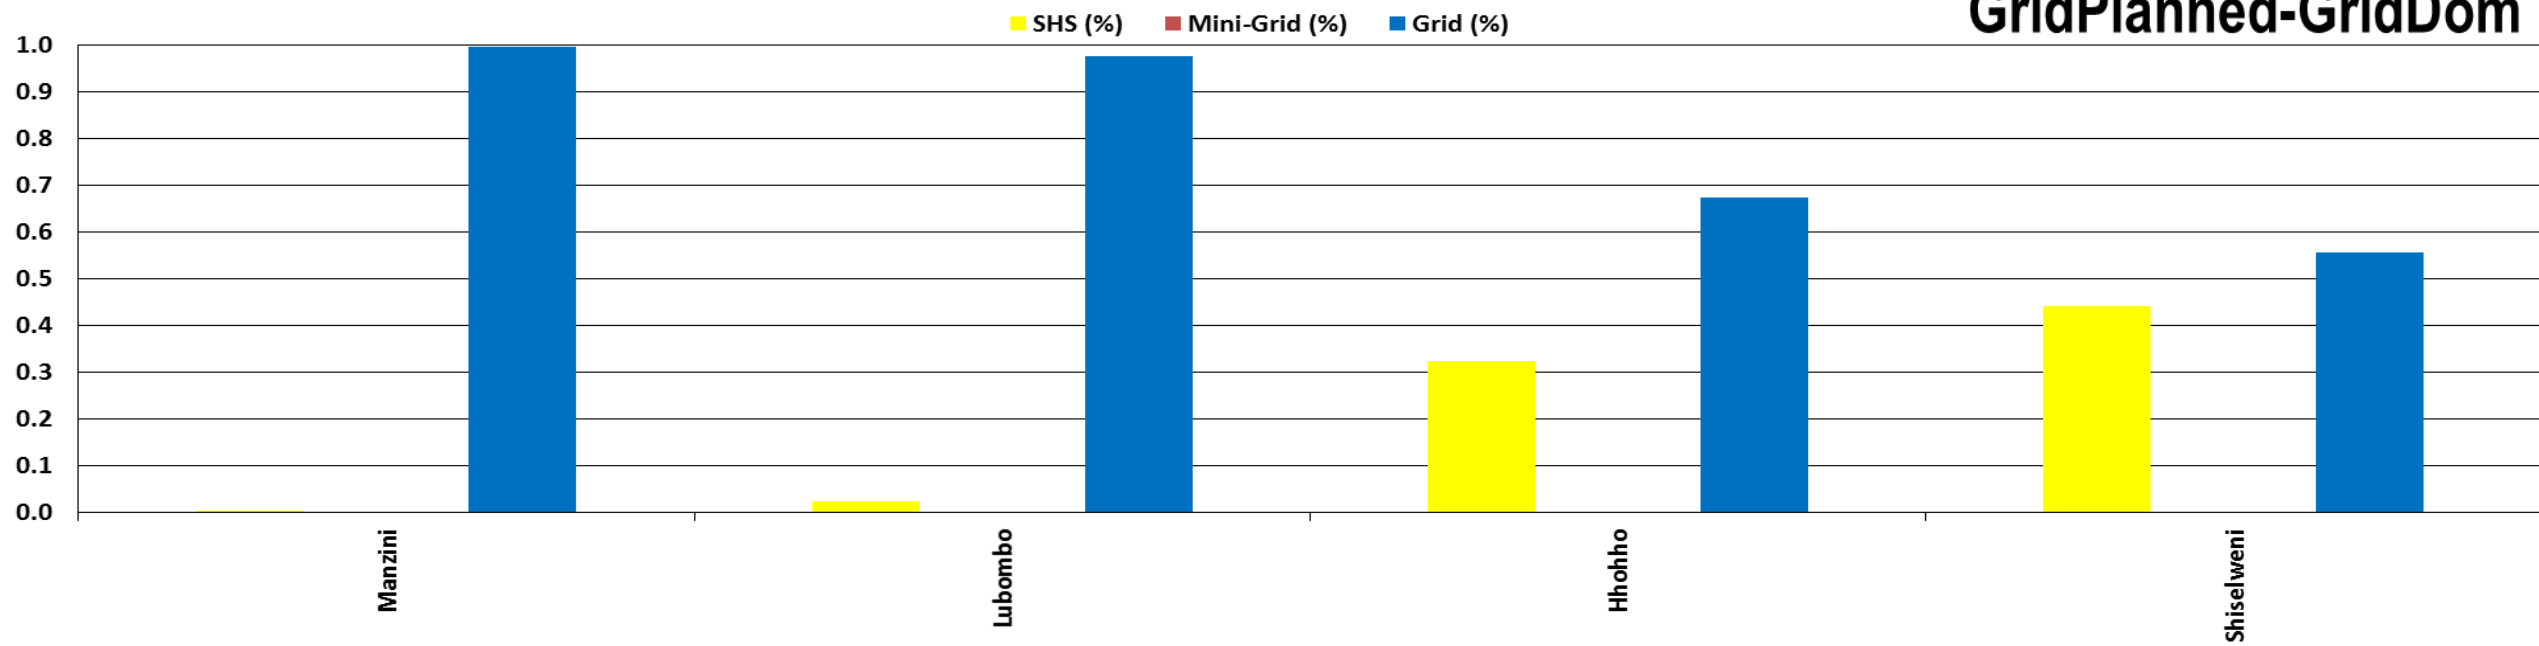

Share of electrification options in all Swazi regions

GridPlanned-SHSDom

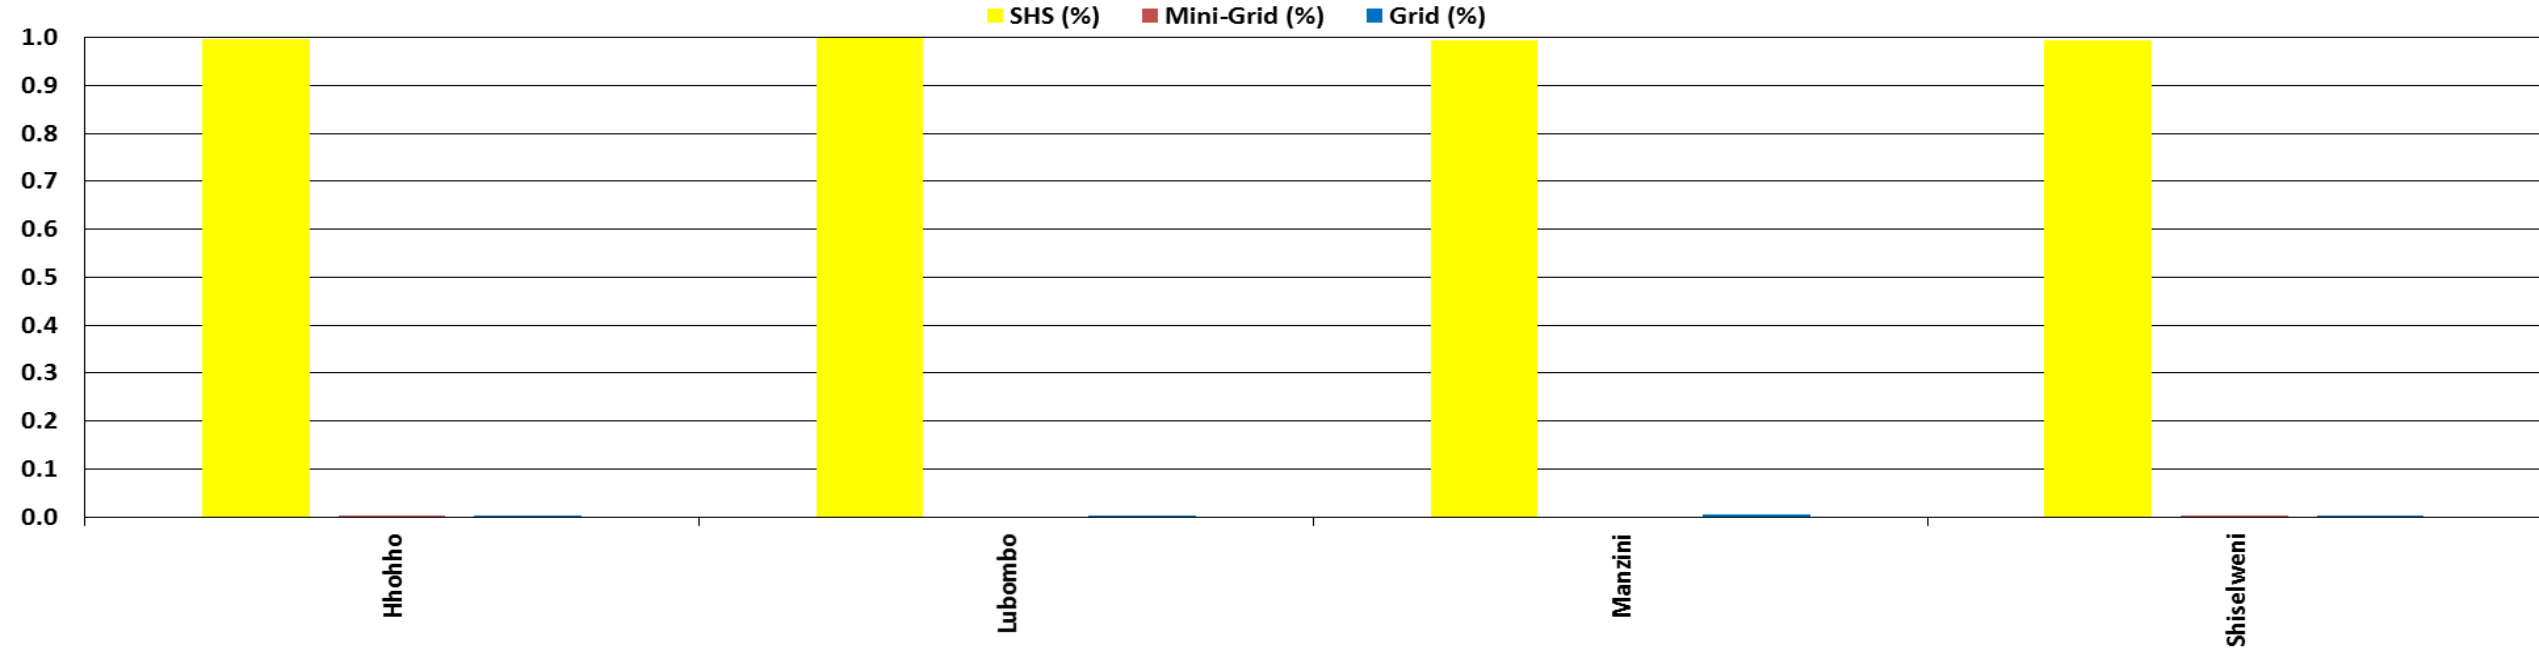

Supplement: s1 [file s1]
