# Supplementary material
Source: MDPI journal article supplement (https://www.mdpi.com/1996-1073/10/11/1899)

# West Africa

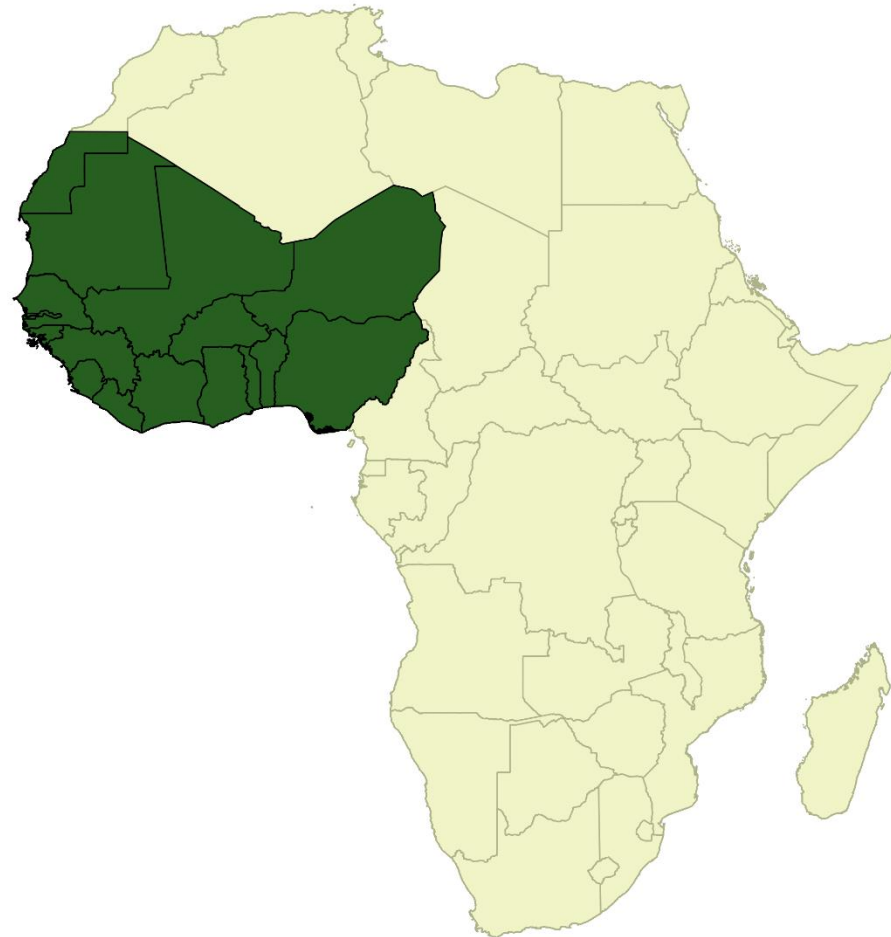

# Benin

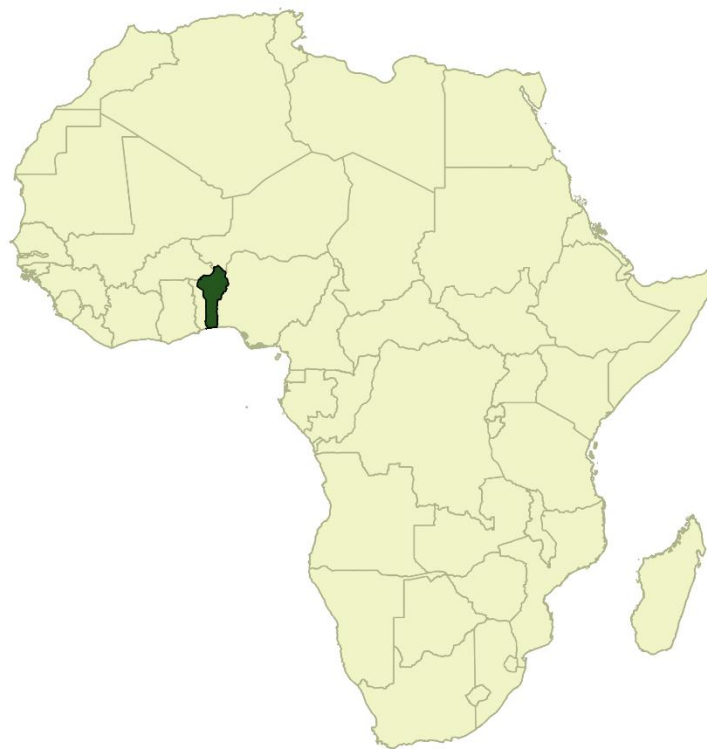

# Night light emission and Population of Beninese regions

## Night light emission in Benin

Detected night lights

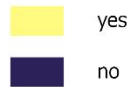

0 75 150 225 300 km

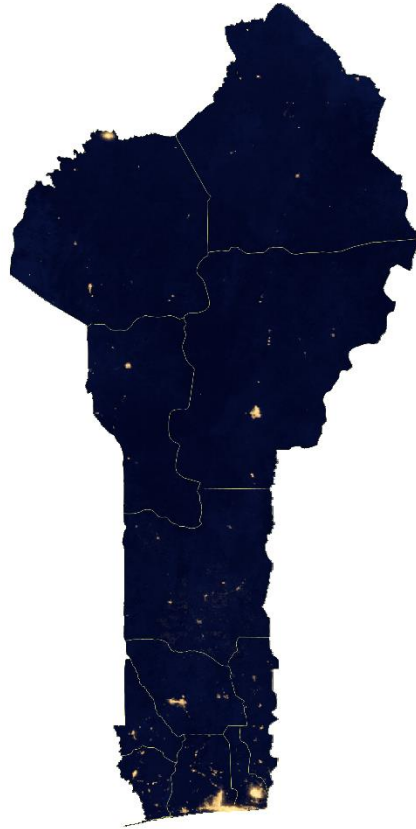

## Population structure of Benin

Population density (people/750x750m<sup>2</sup>)

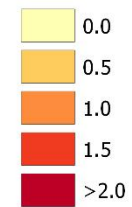

River and Lake (blue)

0 75 150 225 300 km

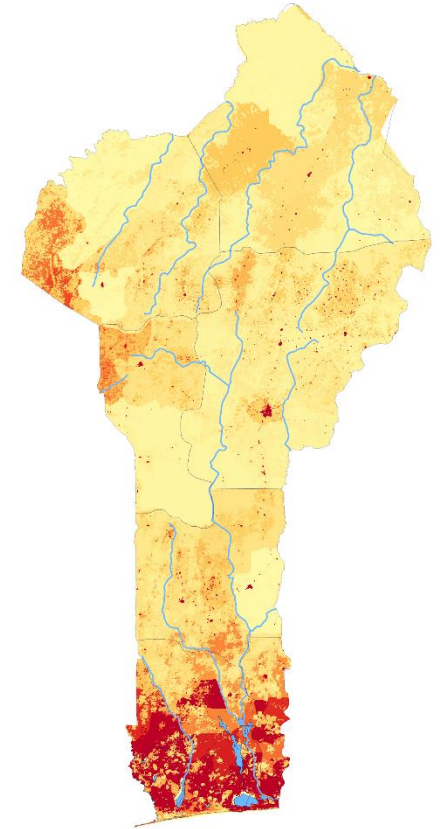

# Electrification option in all Beninese regions: GridBuilt-GridDom

## Electrification options of Beninese regions

Electrification option

-  Solar Home System
-  Mini-Grid
-  Grid Extension

 River and Lake

0 75 150 225 300 km

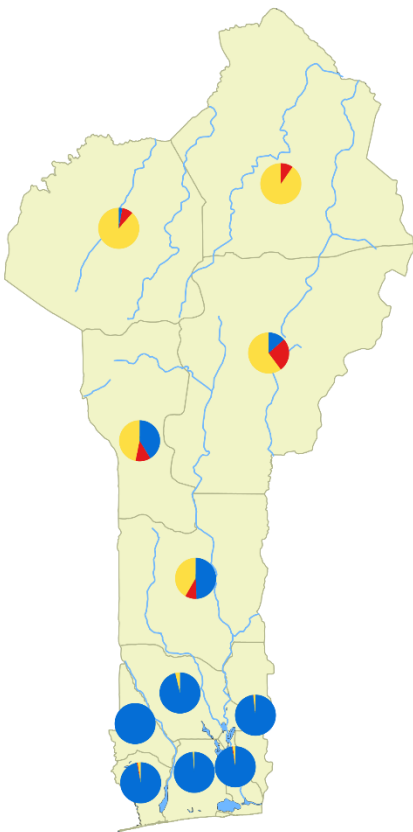

## Electrification options of Beninese regions

Electrification option

-  Solar Home System
-  Mini-Grid
-  Grid Extension

Grid Buffer (diameter)

 50 km

 Power Grid

 River and Lake

0 75 150 225 300 km

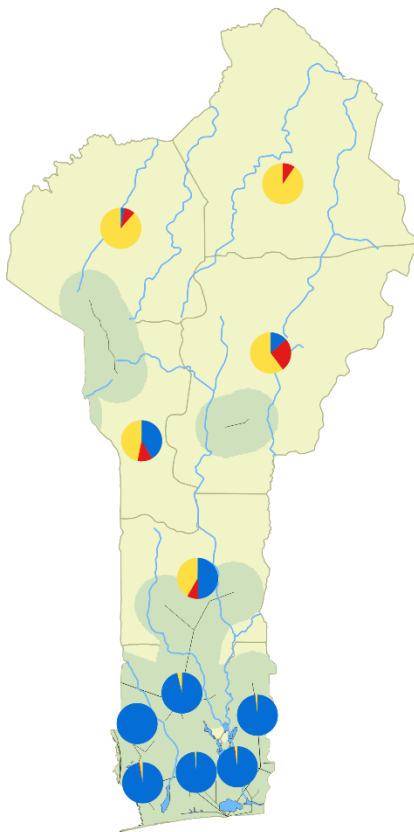

# Electrification option in all Beninese regions: GridBuilt-SHSDom

## Electrification options of Beninese regions

Electrification option

-  Solar Home System
-  Mini-Grid
-  Grid Extension

 River and Lake

0 75 150 225 300 km

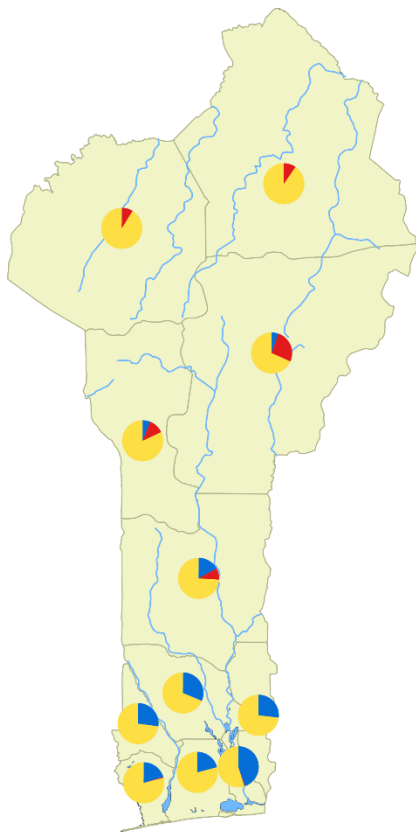

## Electrification options of Beninese regions

Electrification option

-  Solar Home System
-  Mini-Grid
-  Grid Extension

Grid Buffer (diameter)

 50 km

 Power Grid

 River and Lake

0 75 150 225 300 km

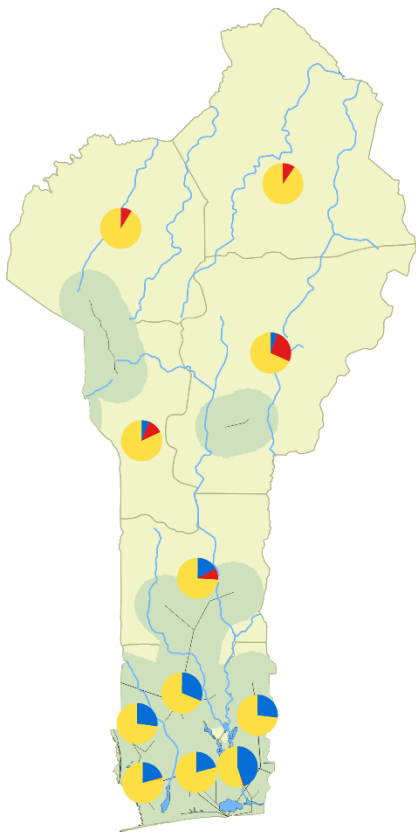

# Electrification option: GridBuilt-SHSDom

## Electrification options of Beninese regions

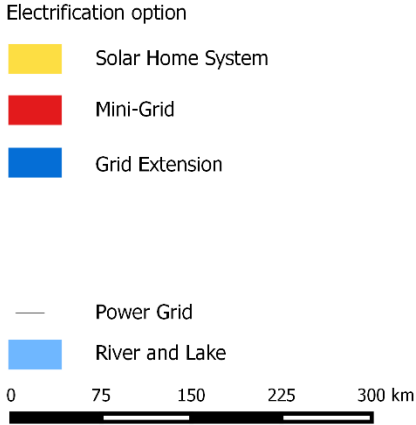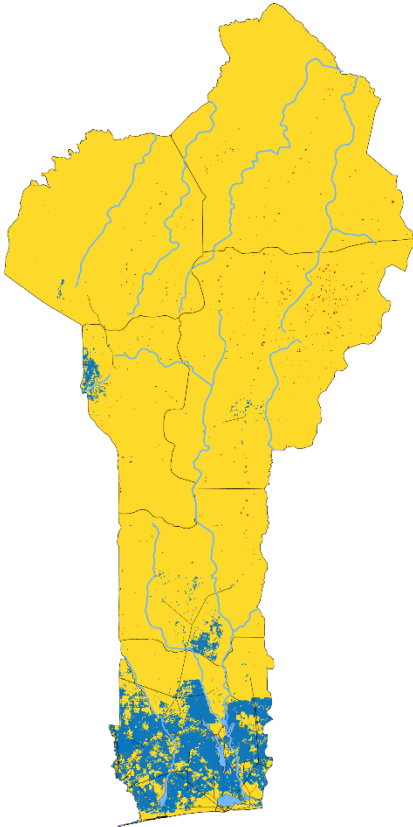

# Electrification option: GridBuilt-GridDom

## Electrification options of Beninese regions

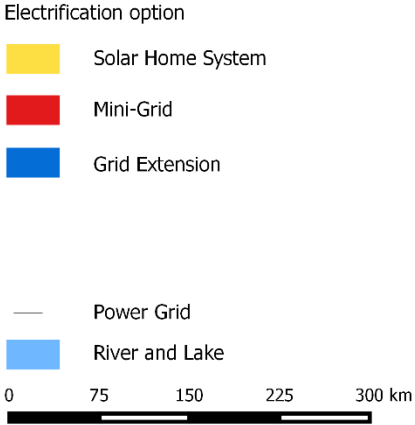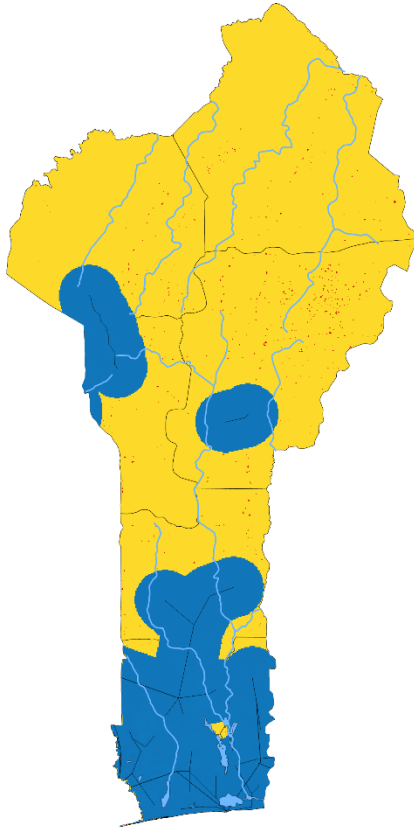

Share of electrification option in all Beninese regions

GridBuilt-GridDom

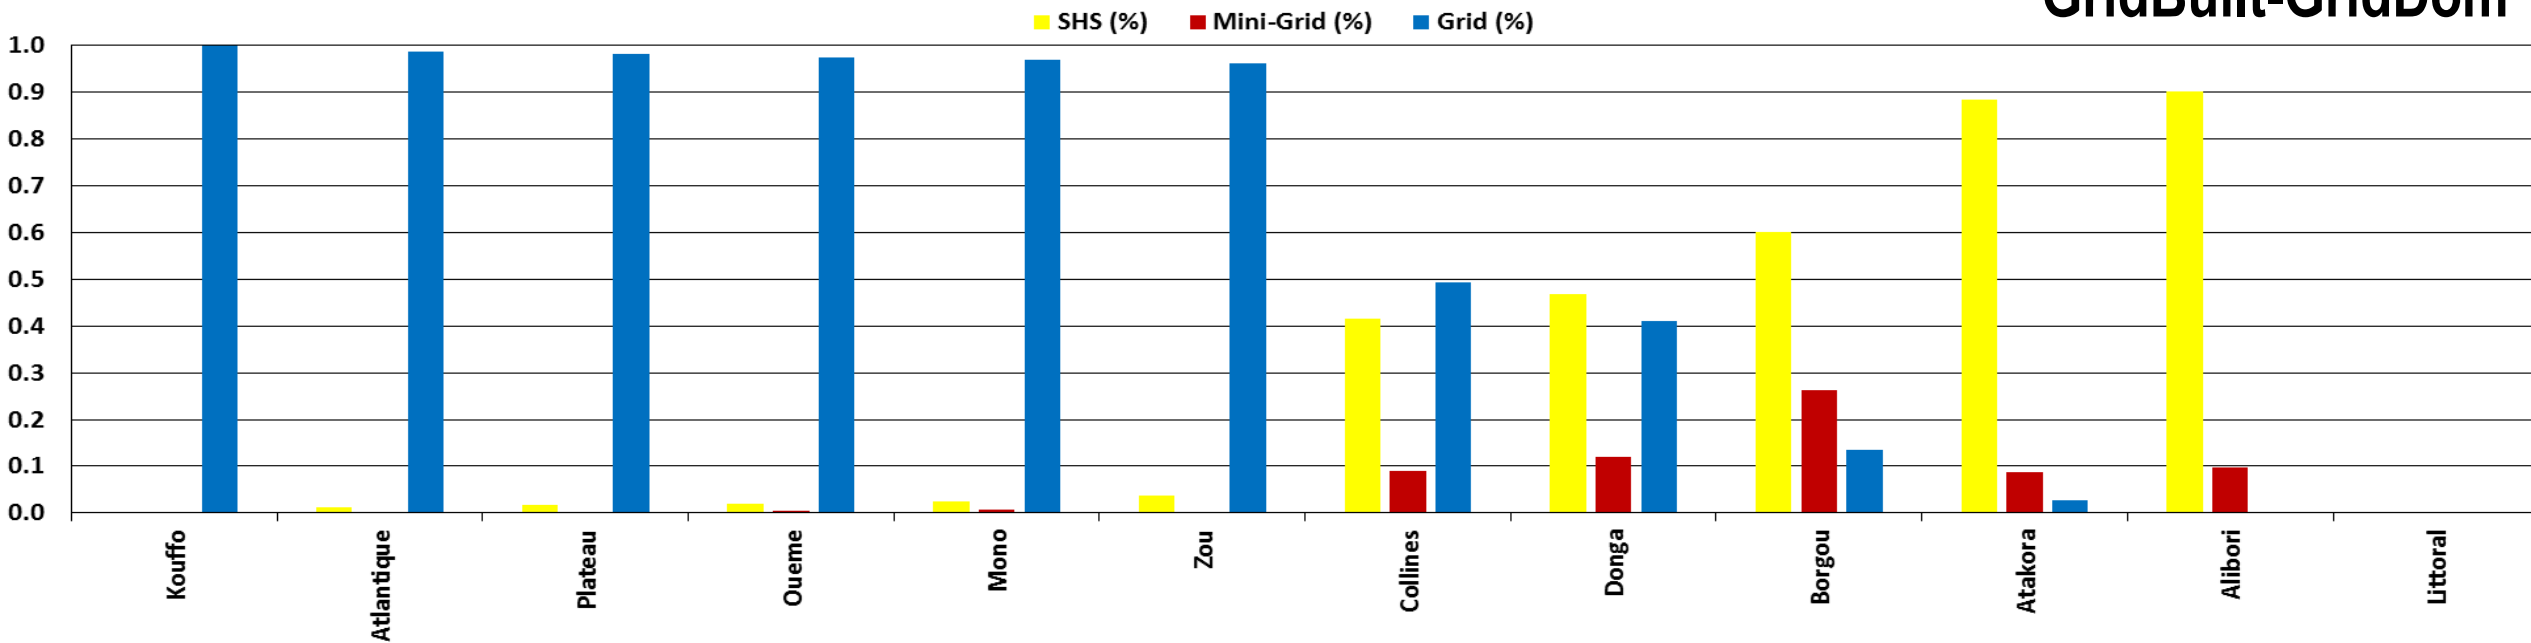

Share of electrification options in all Beninese regions

GridBuilt-SHSDom

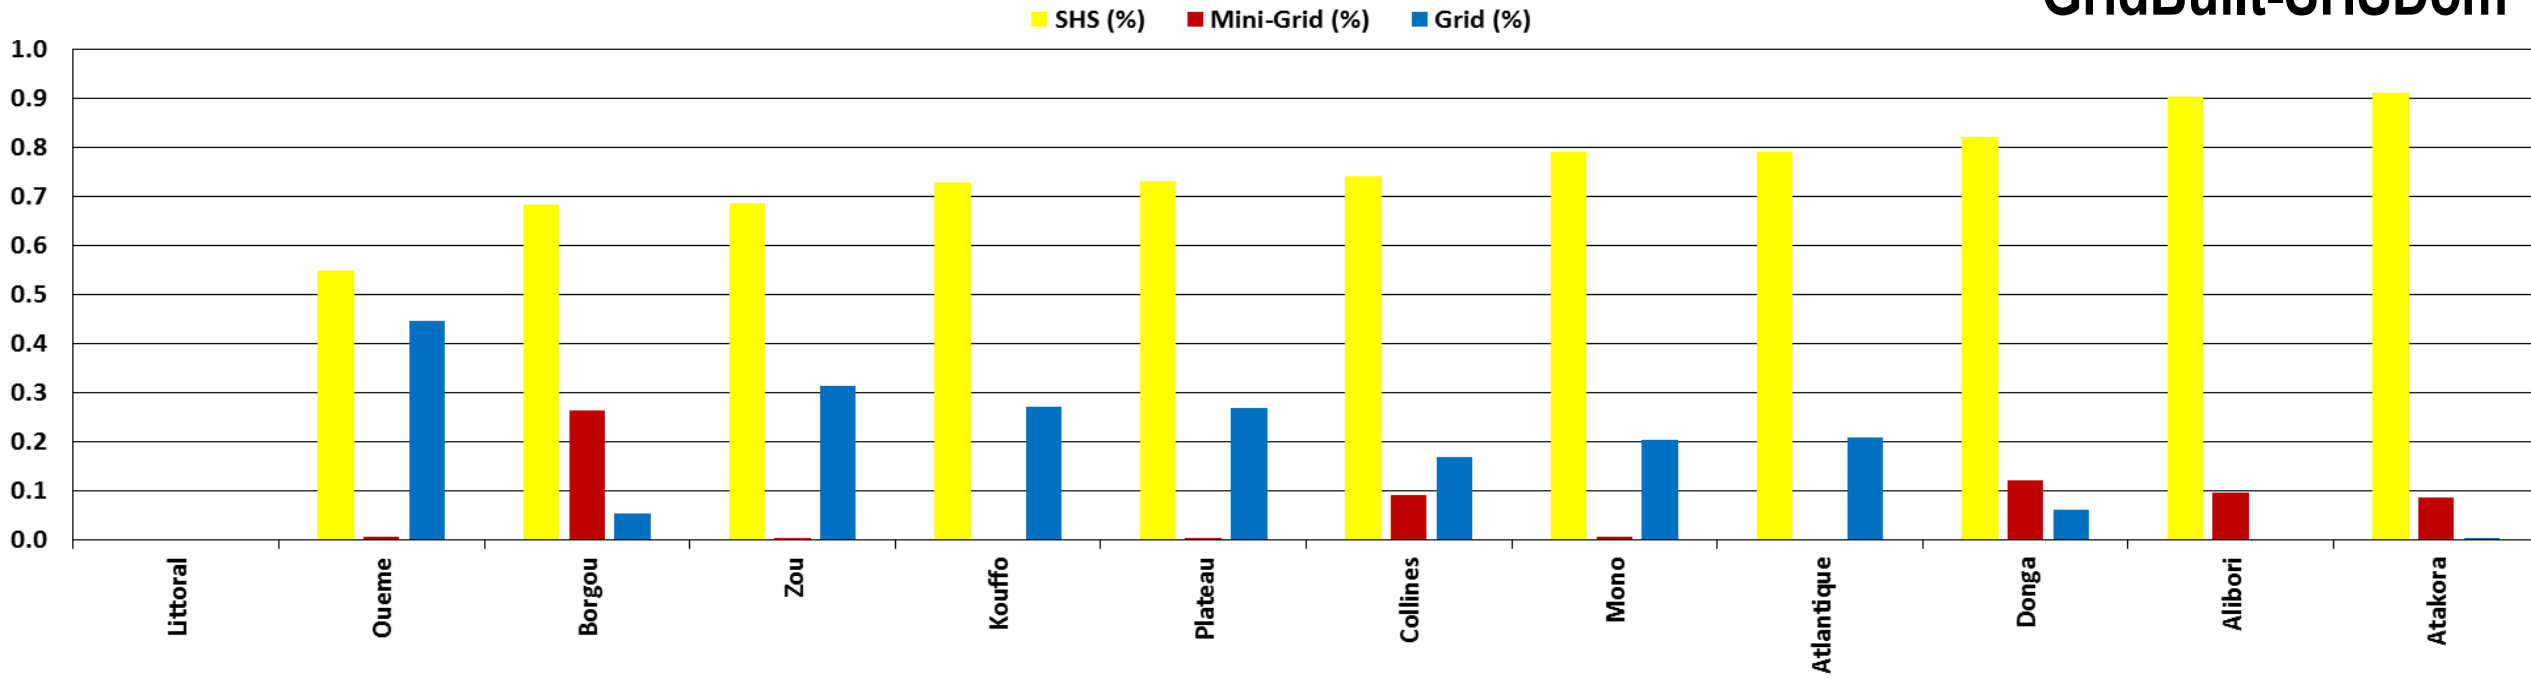

# Electrification option in all Beninese regions: GridPlanned-GridDom

## Electrification options of Beninese regions

Electrification option

- Solar Home System
- Mini-Grid
- Grid Extension

River and Lake

0 75 150 225 300 km

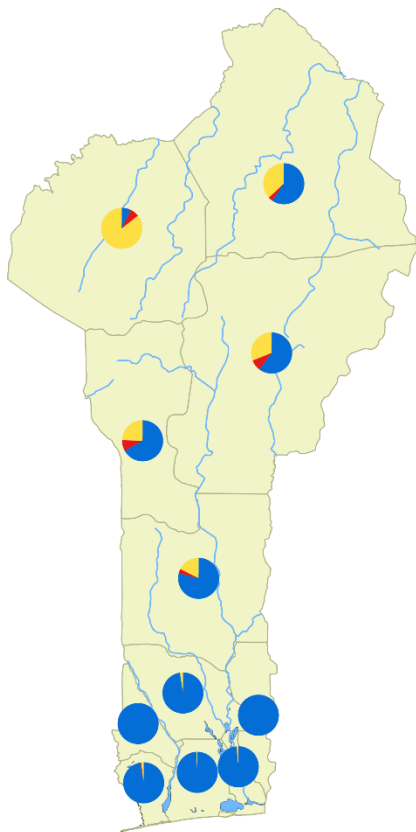

## Electrification options of Beninese regions

Electrification option

- Solar Home System
- Mini-Grid
- Grid Extension

Grid Buffer (diameter)

50 km

Power Grid

River and Lake

0 75 150 225 300 km

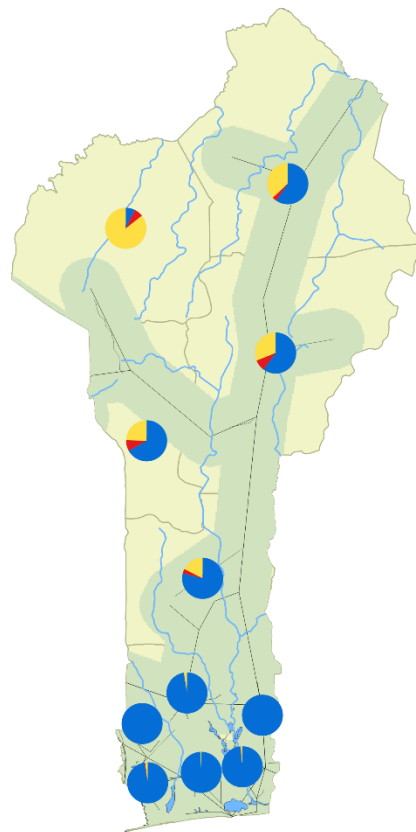

# Electrification option in all Beninese regions: GridPlanned-SHSDom

## Electrification options of Beninese regions

Electrification option

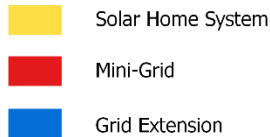

River and Lake

0 75 150 225 300 km

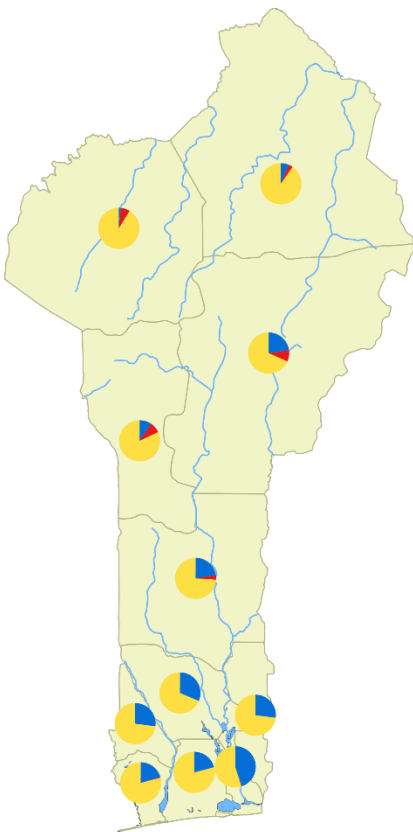

## Electrification options of Beninese regions

Electrification option

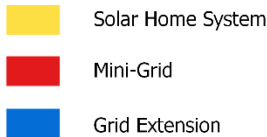

Grid Buffer (diameter)

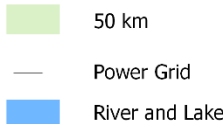

0 75 150 225 300 km

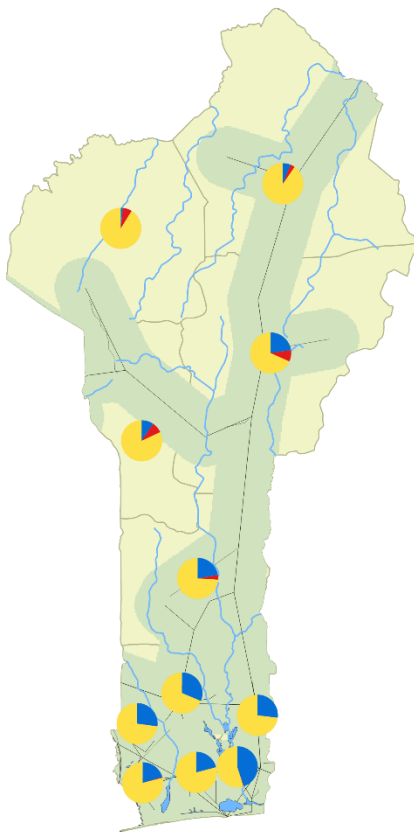

# Electrification option: GridPlanned-SHSDom

# Electrification option: GridPlanned-GridDom

Electrification options of Beninese regions

Electrification option

- Solar Home System
- Mini-Grid
- Grid Extension

Power Grid

River and Lake

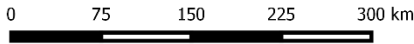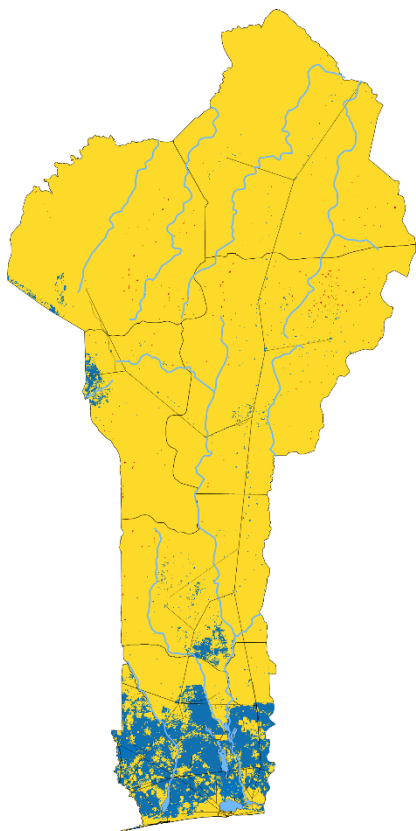

Electrification options of Beninese regions

Electrification option

- Solar Home System
- Mini-Grid
- Grid Extension

Power Grid

River and Lake

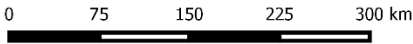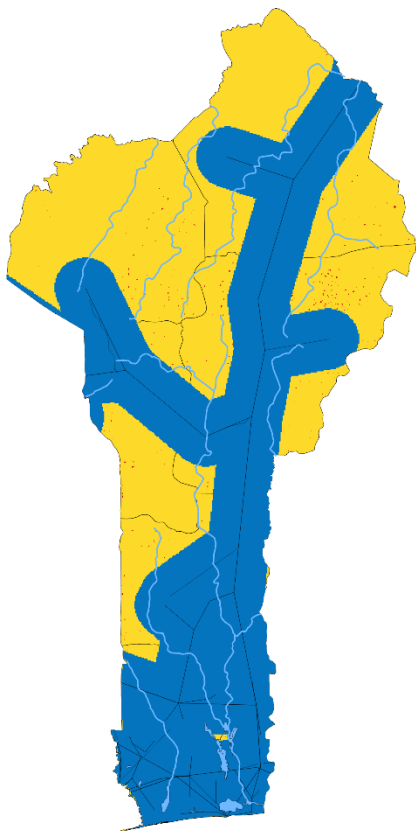

Share of electrification options in all Beninese regions

GridPlanned-GridDom

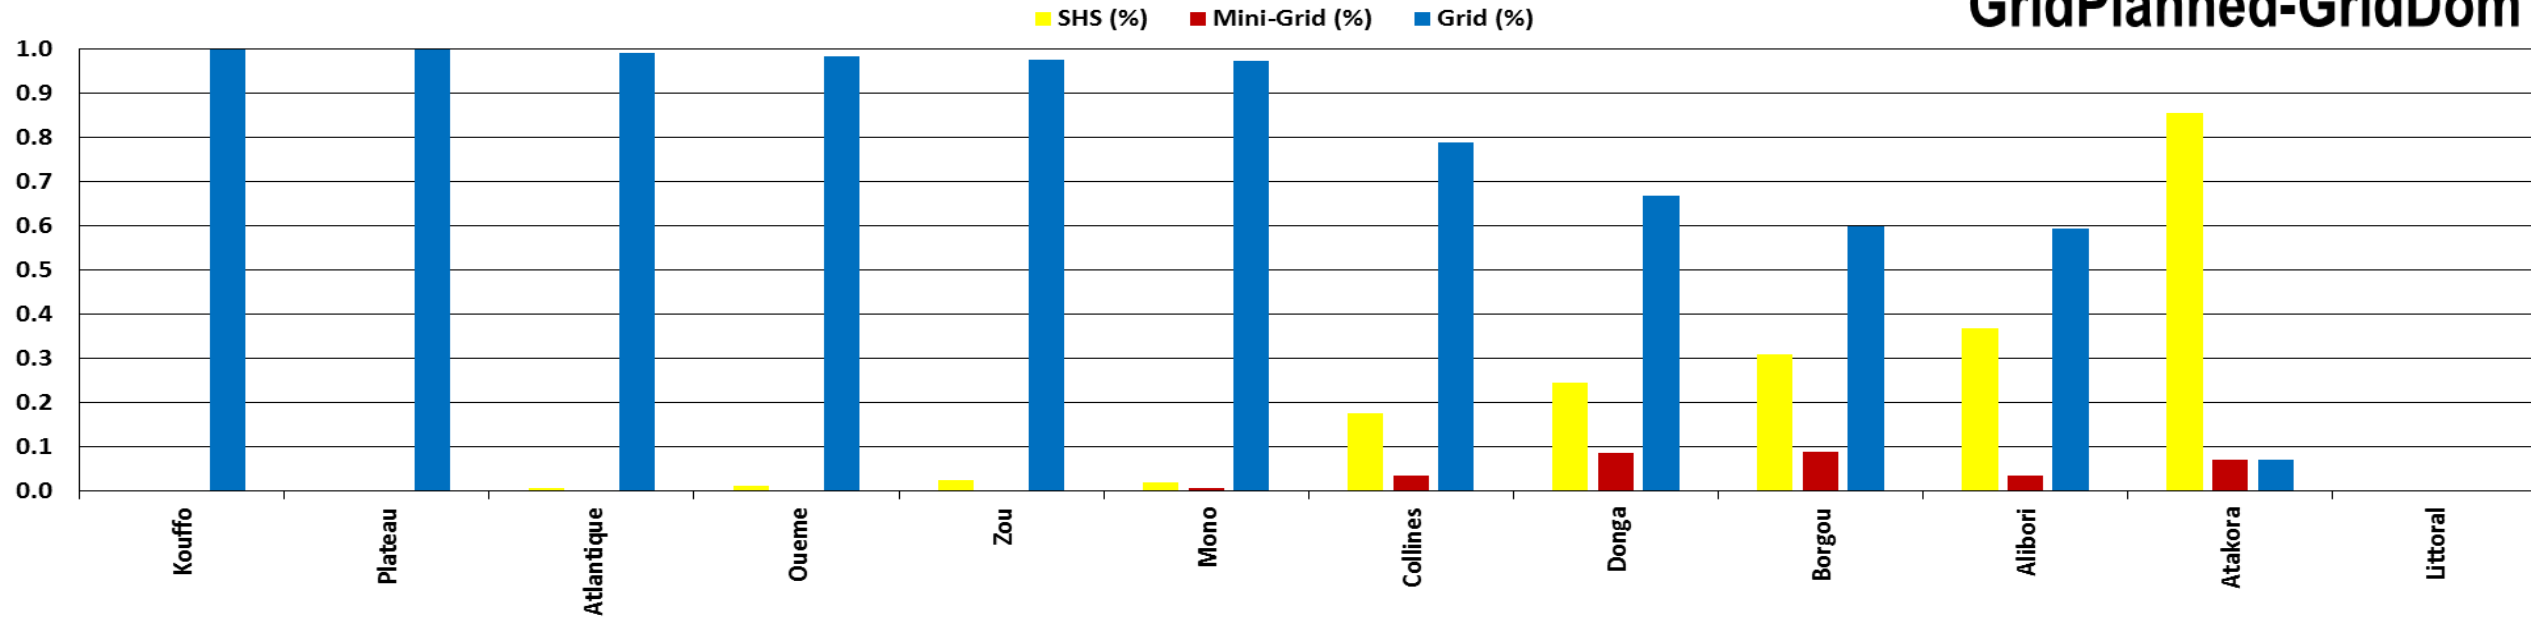

Share of electrification options in all Beninese regions

GridPlanned-SHSDom

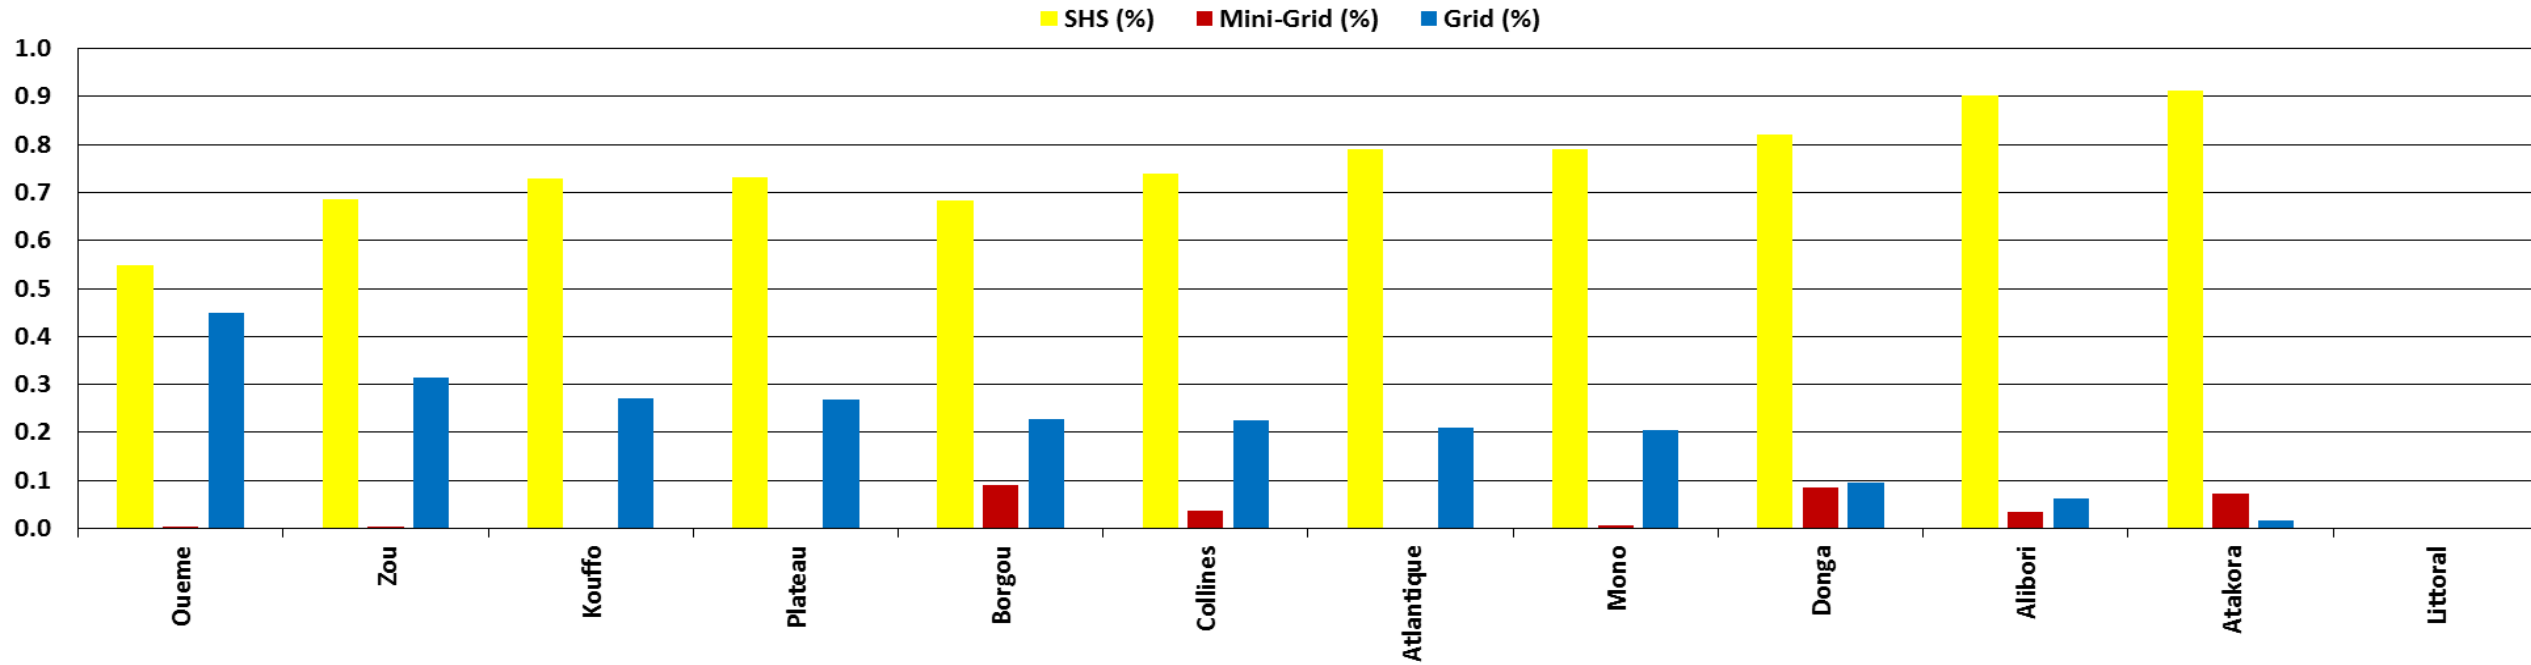

# Burkina Faso

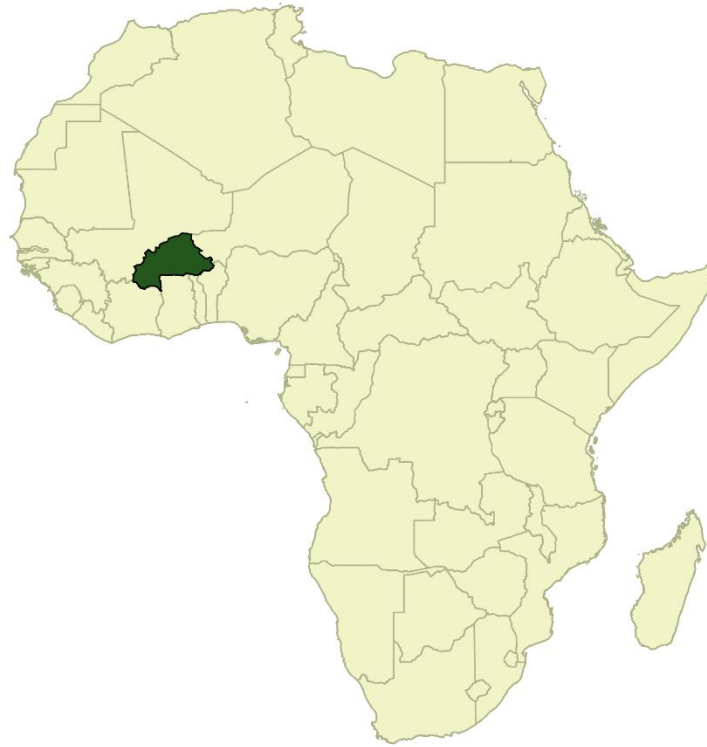

# Night light emission and Population of Burkinabé regions

**Night light emission in Burkina Faso**

Detected night lights

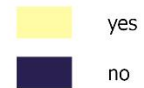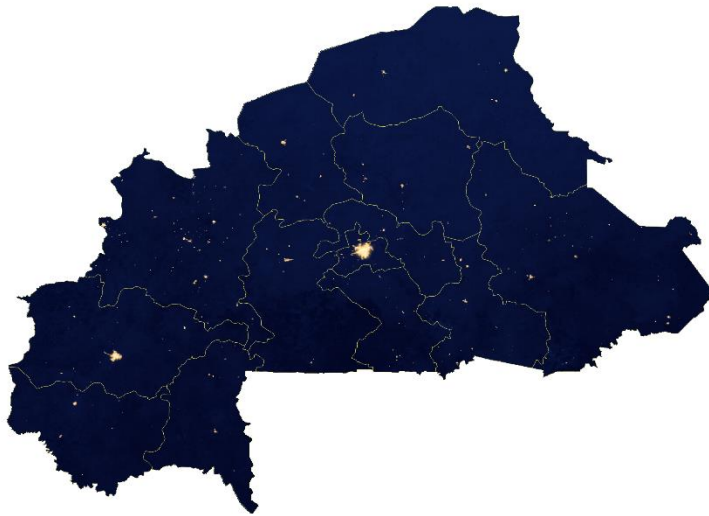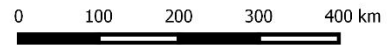

**Population structure of Burkina Faso**

Population Density (people/750x750m<sup>2</sup>)

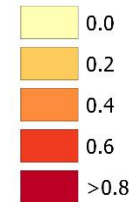

River and Lake

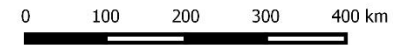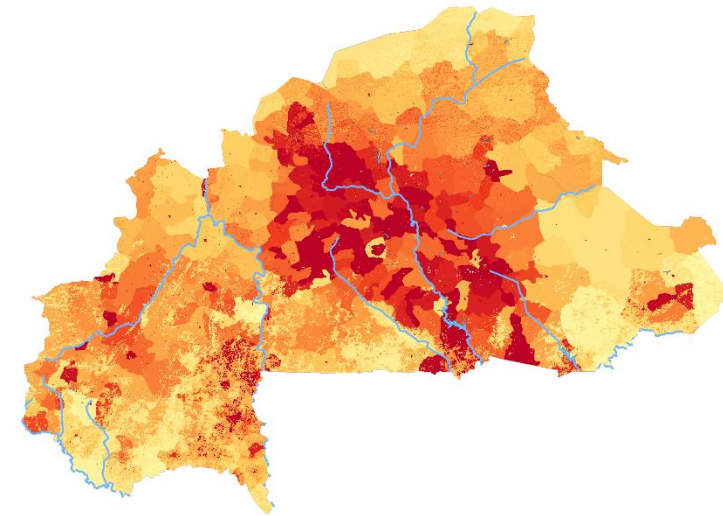

# Electrification option in all Burkinabé regions: GridBuilt-GridDom

## Electrification options of Burkinabé regions

Electrification option

- Solar Home System
- Mini-Grid
- Grid Extension

River and Lake

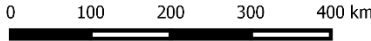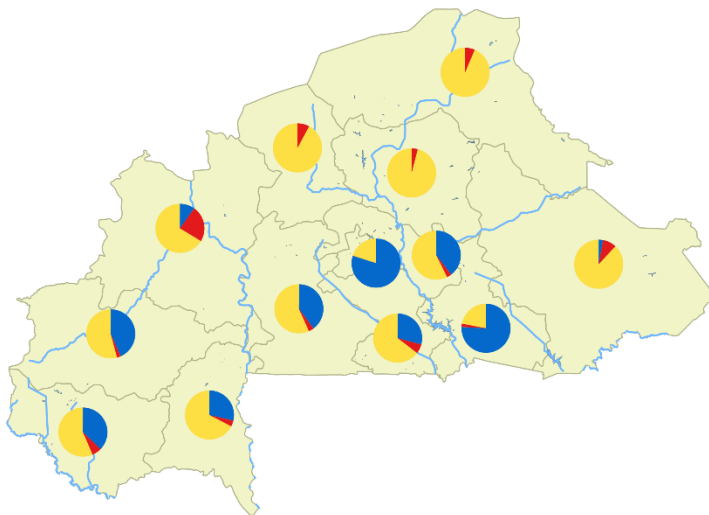

## Electrification options of Burkinabé regions

Electrification option

- Solar Home System
- Mini-Grid
- Grid Extension

Grid Buffer (diameter)

- 50 km
- Power Grid
- River and Lake

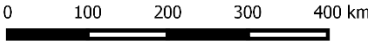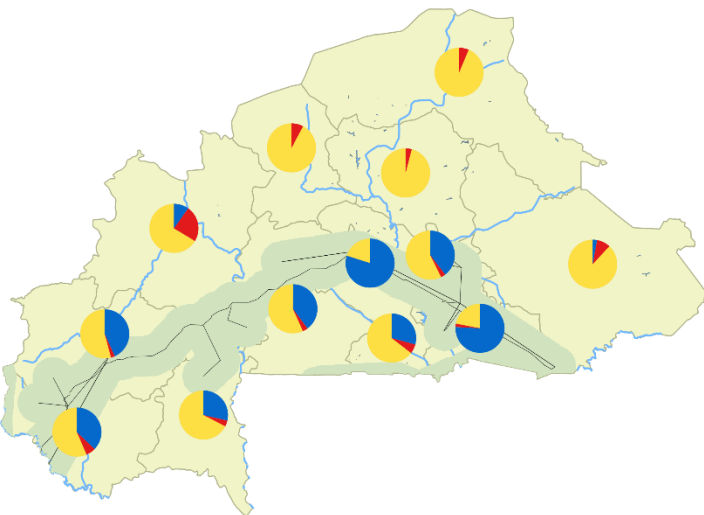

# Electrification option in all Burkinabé regions: GridBuilt-SHSDom

## Electrification options of Burkinabé regions

- Electrification option
- Solar Home System
  - Mini-Grid
  - Grid Extension

River and Lake

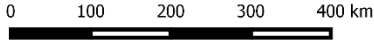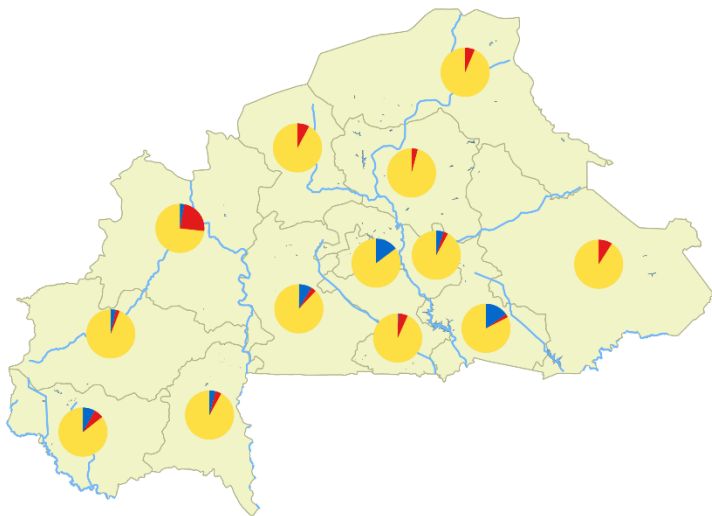

## Electrification options of Burkinabé regions

- Electrification option
- Solar Home System
  - Mini-Grid
  - Grid Extension

Grid Buffer (diameter)

50 km

Power Grid

River and Lake

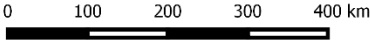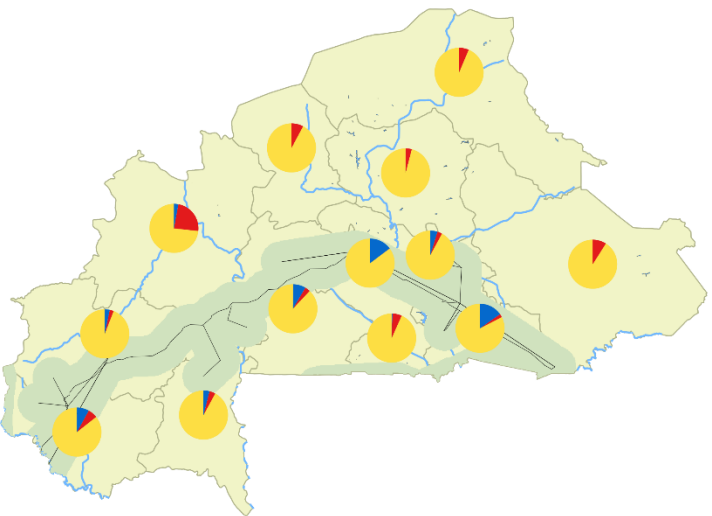

# Electrification option: GridBuilt-SHSDom

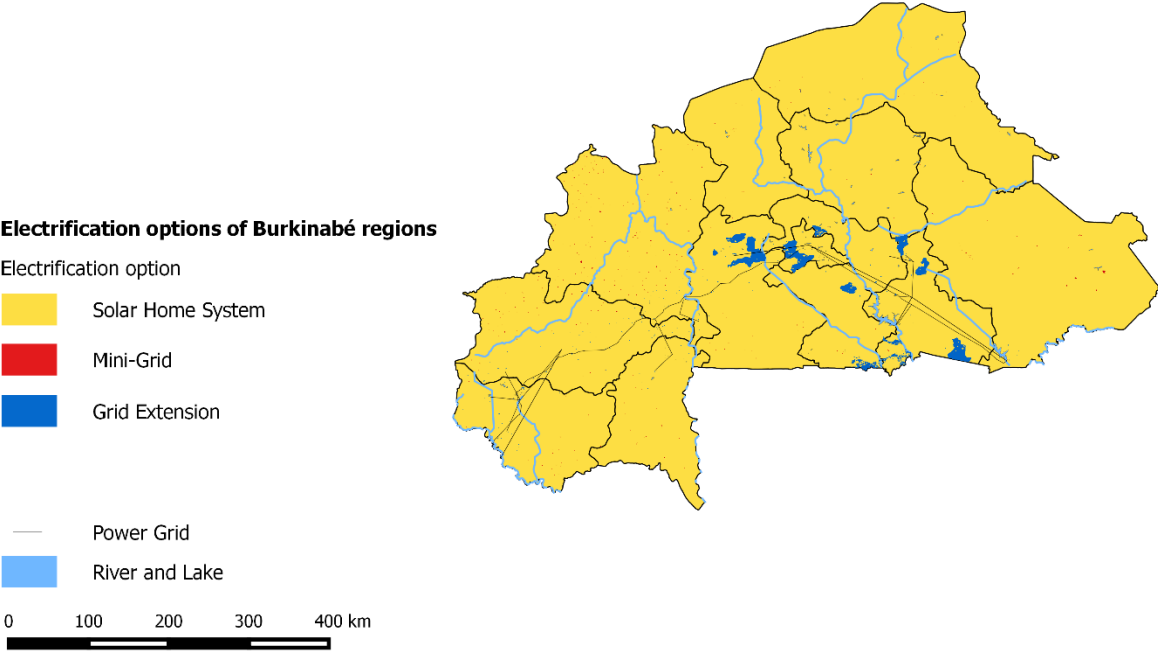

# Electrification option: GridBuilt-GridDom

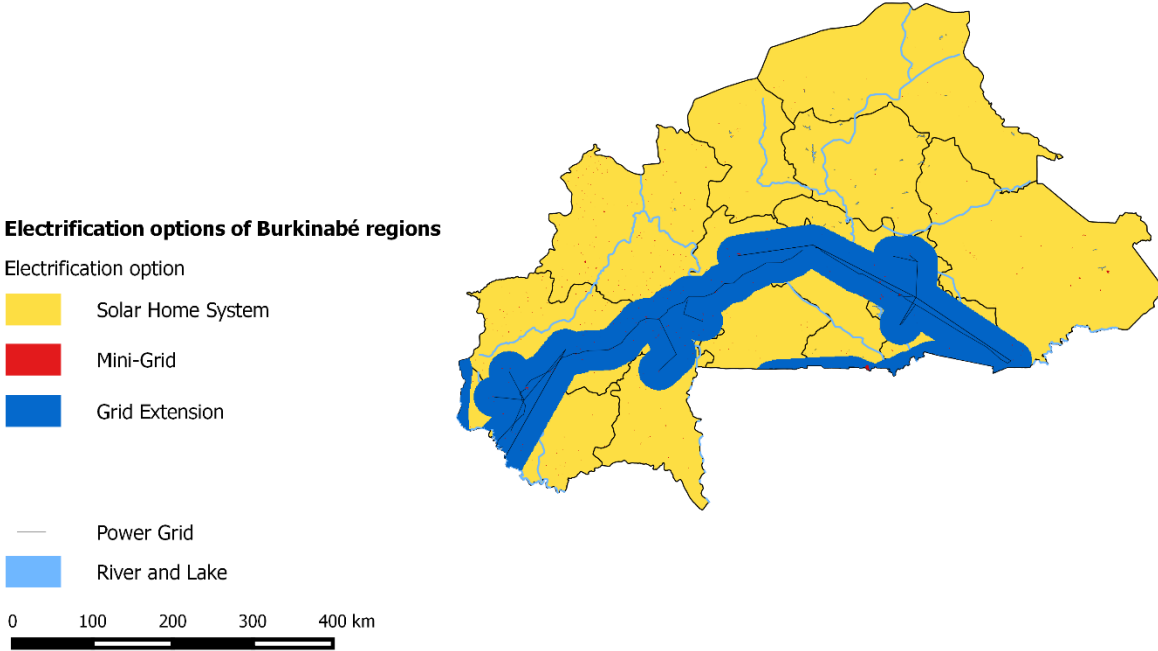

Share of electrification options in all Burkinabé regions

SHS (%) Mini-Grid (%) Grid (%)

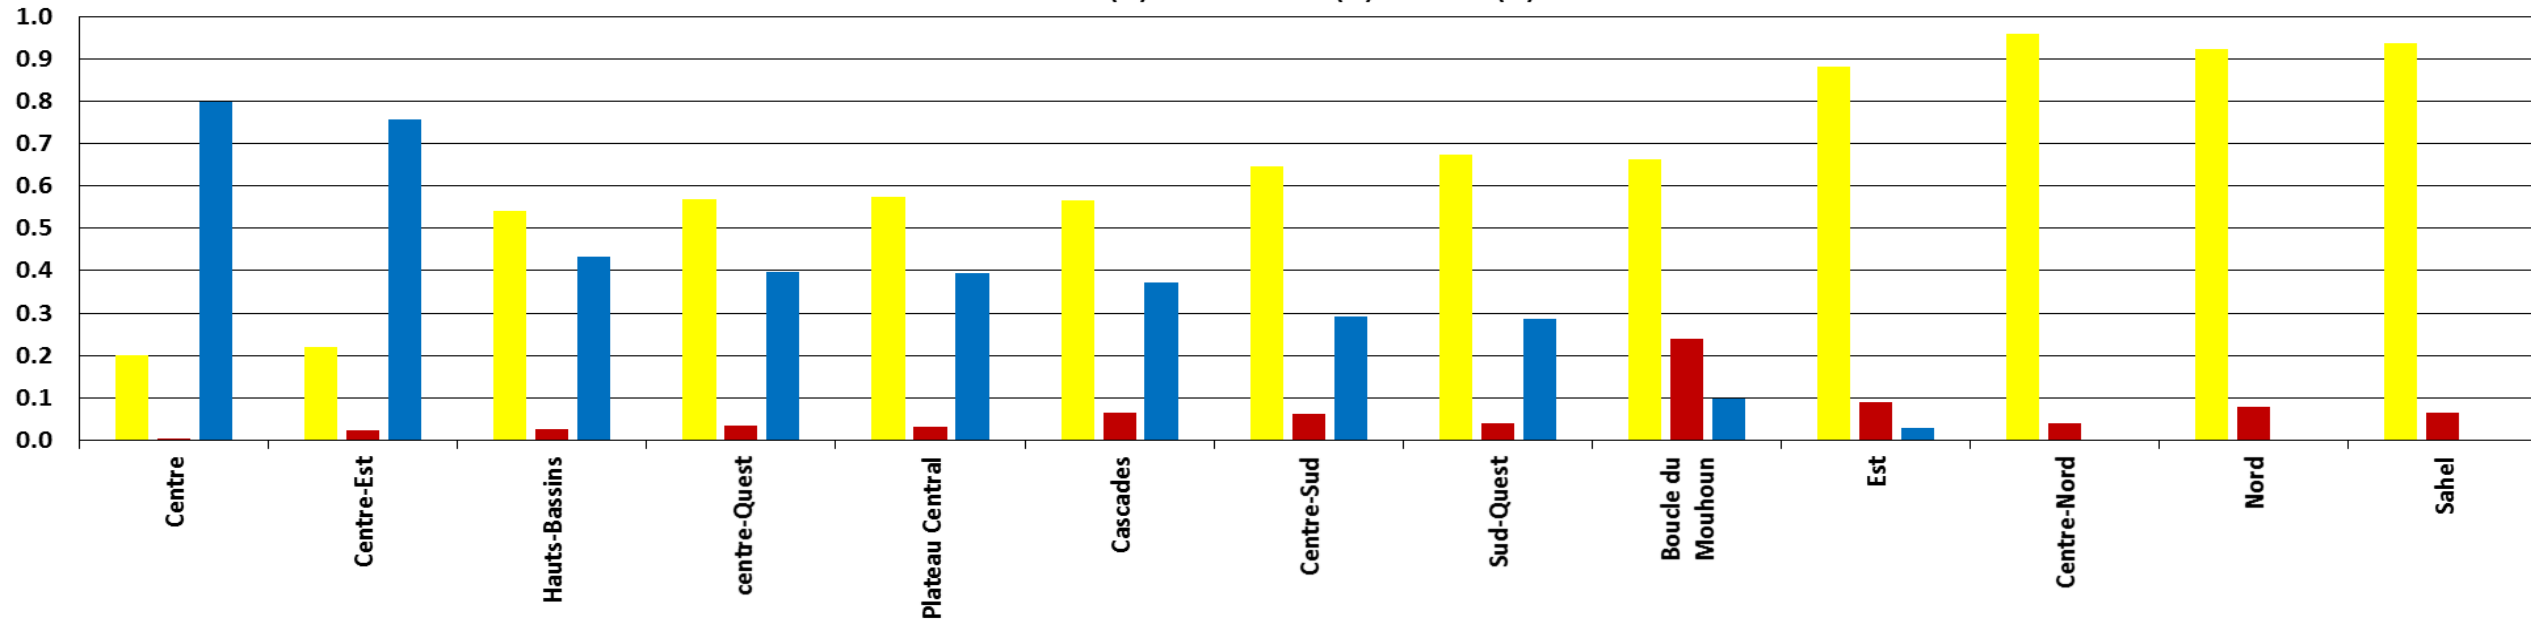

Share of electrification options in all Burkinabé regions

SHS (%) Mini-Grid (%) Grid (%)

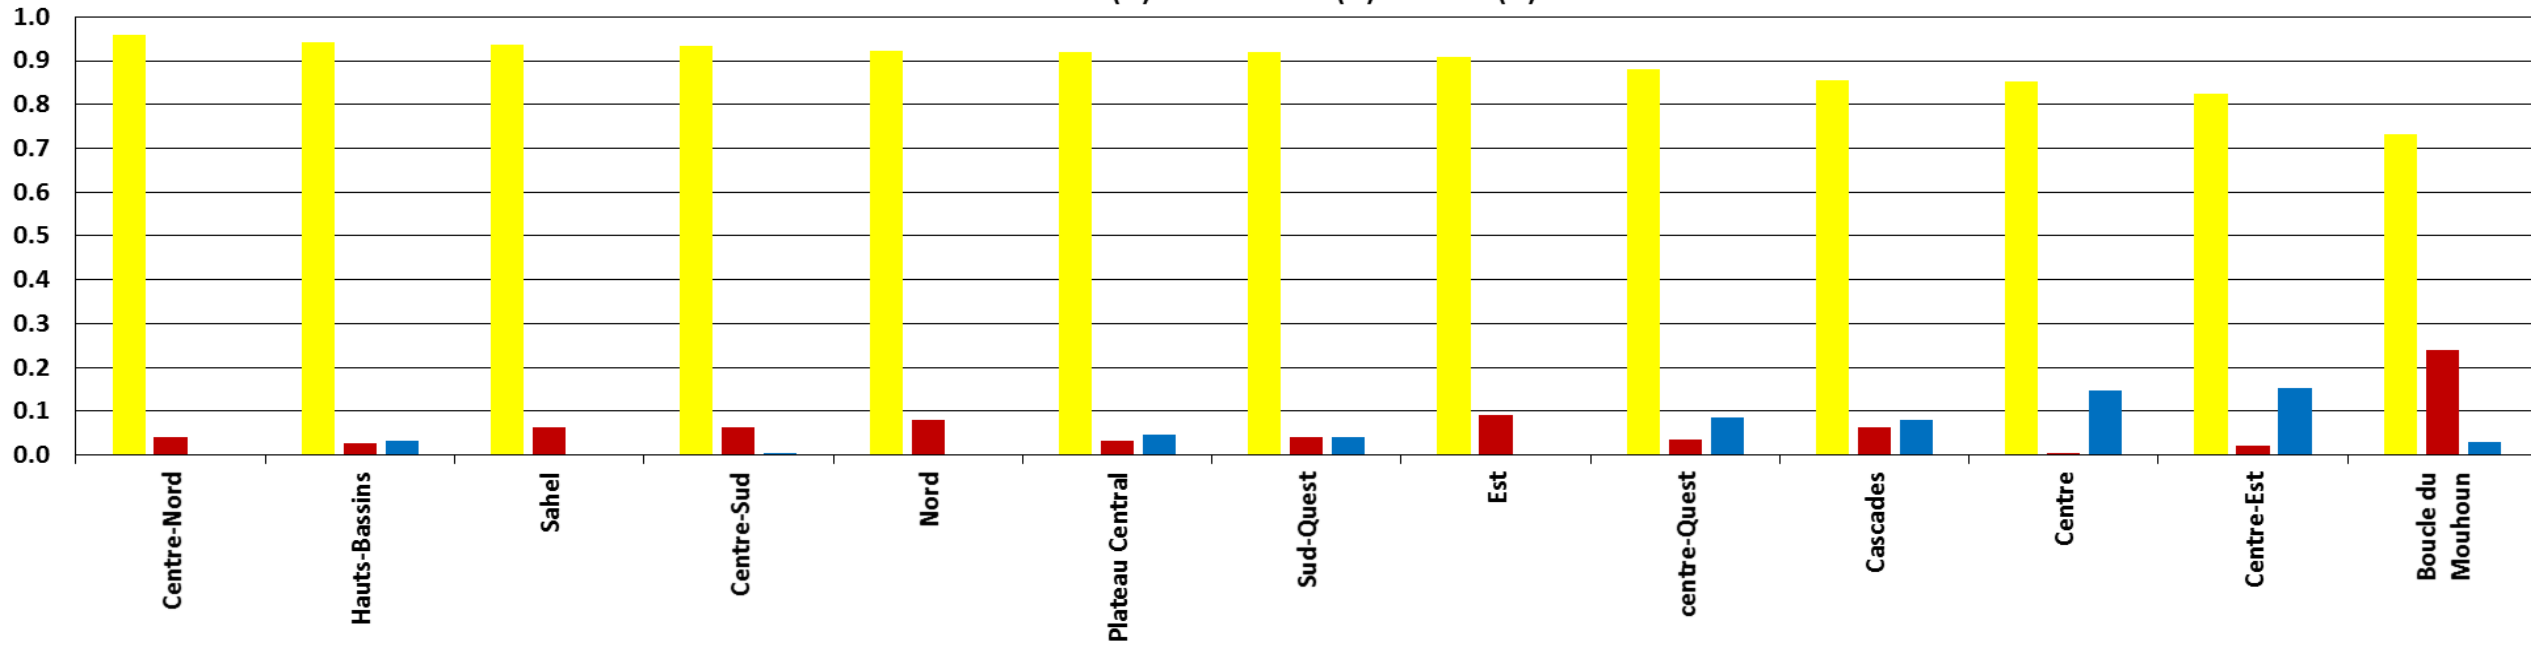

# Electrification option in all Burkinabé regions: GridPlanned-GridDom

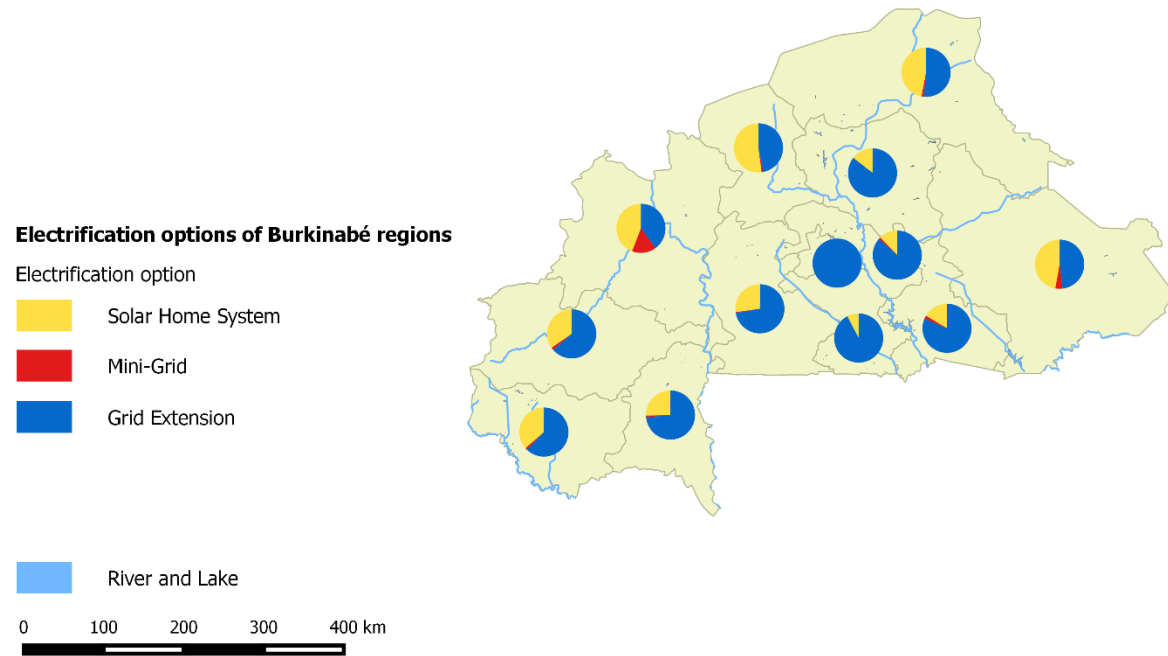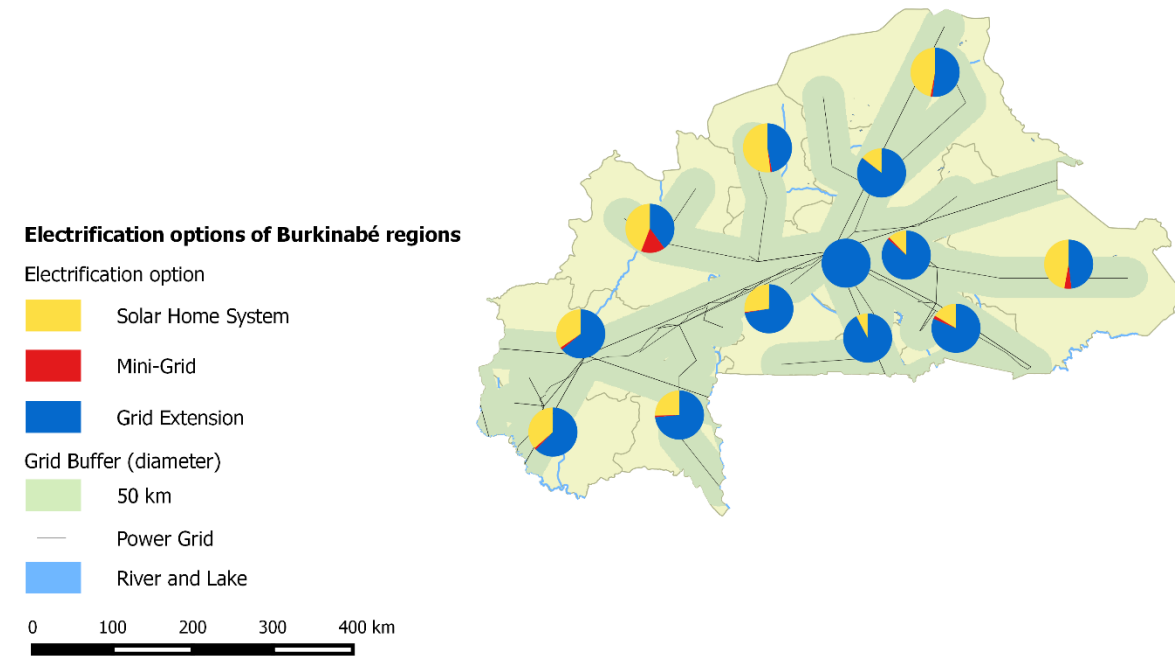

# Electrification option in all Burkinabé regions: GridPlanned-SHSDom

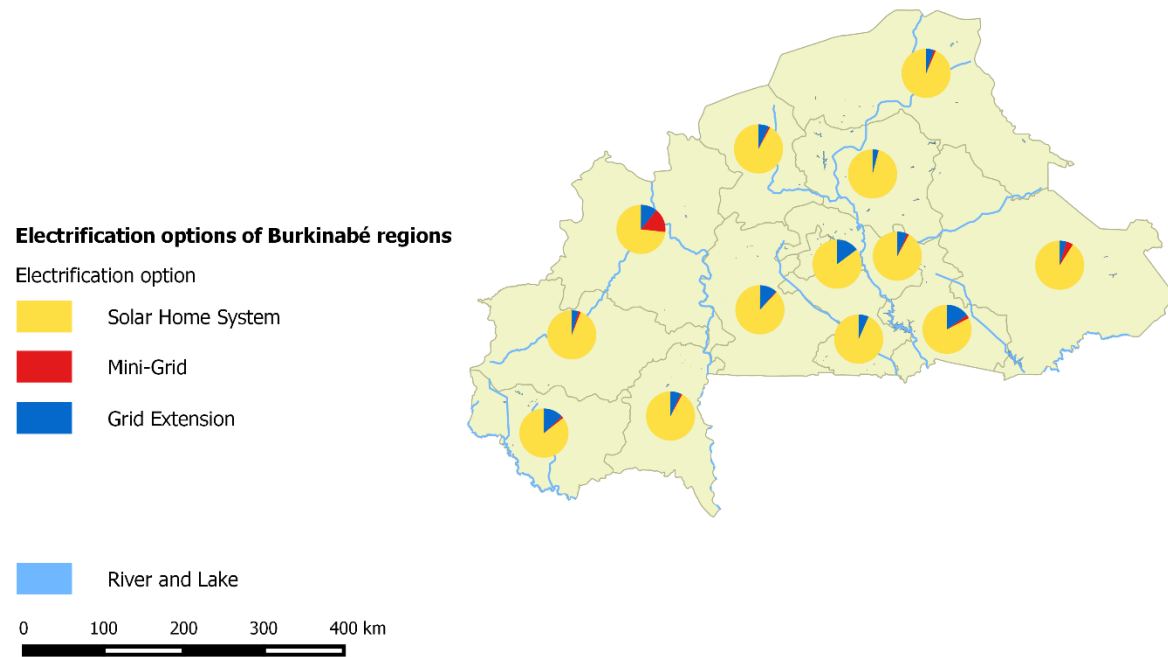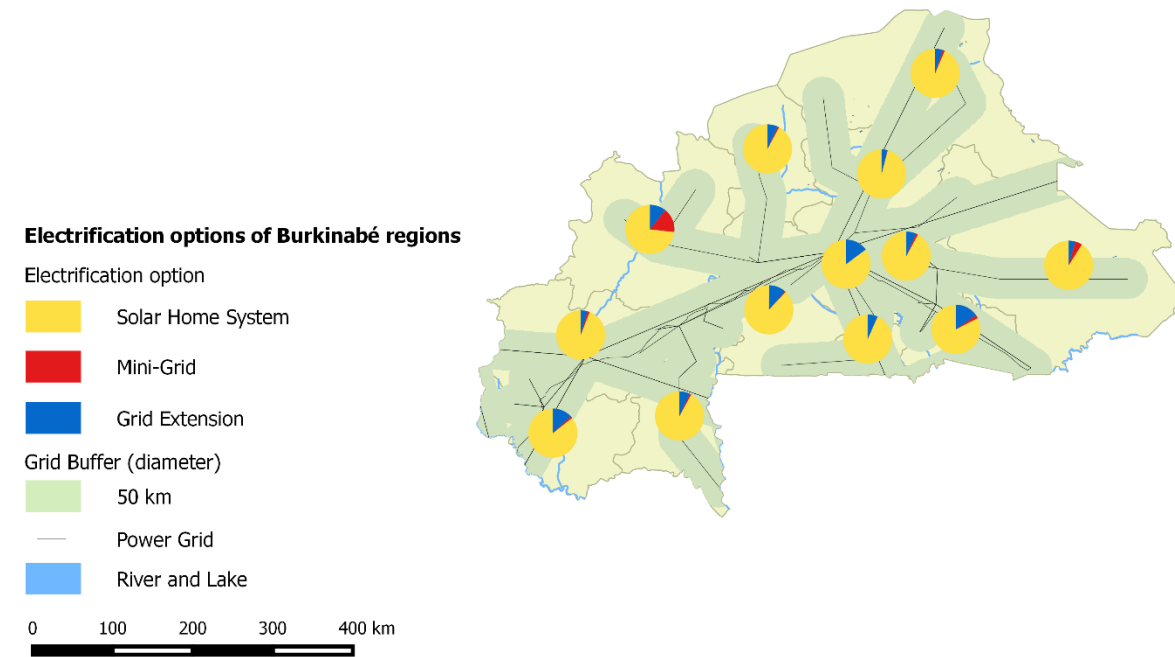

# Electrification option: GridPlanned-SHSDom

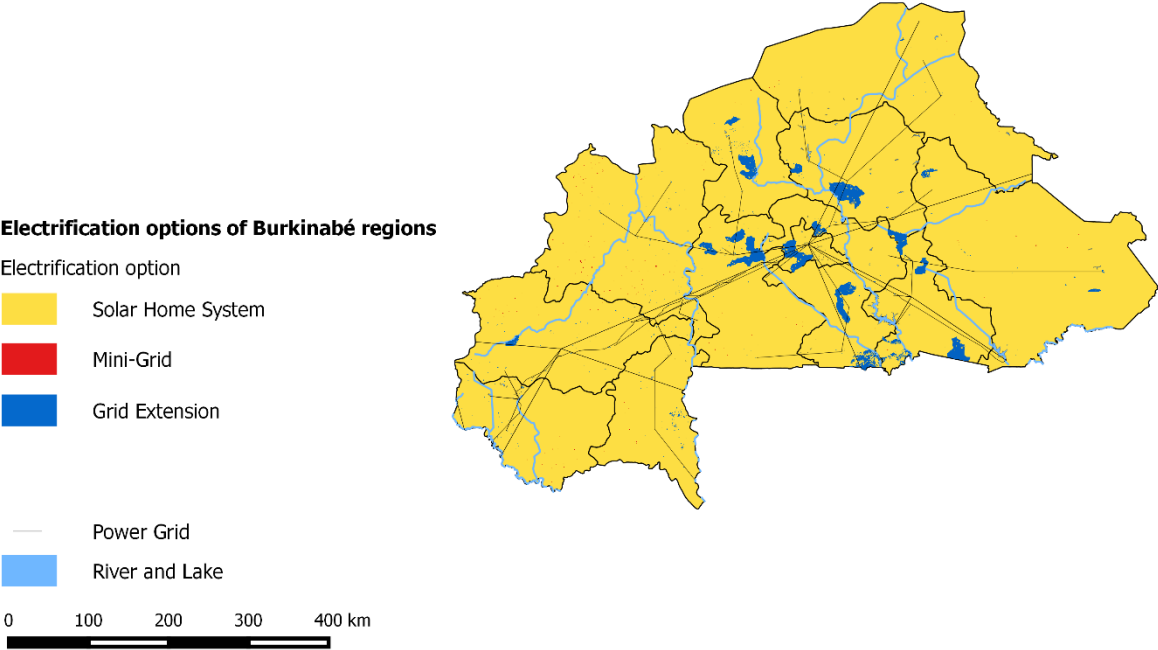

# Electrification option: GridPlanned-GridDom

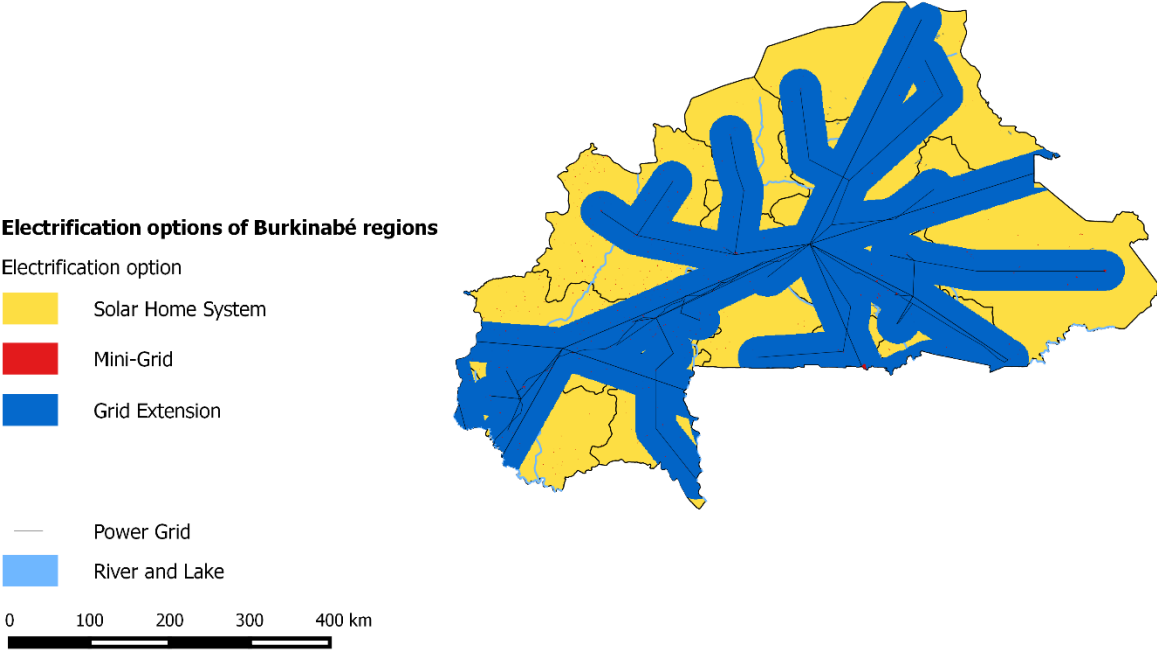

Share of electrification options in all Burkinabé regions

GridPlanned-GridDom

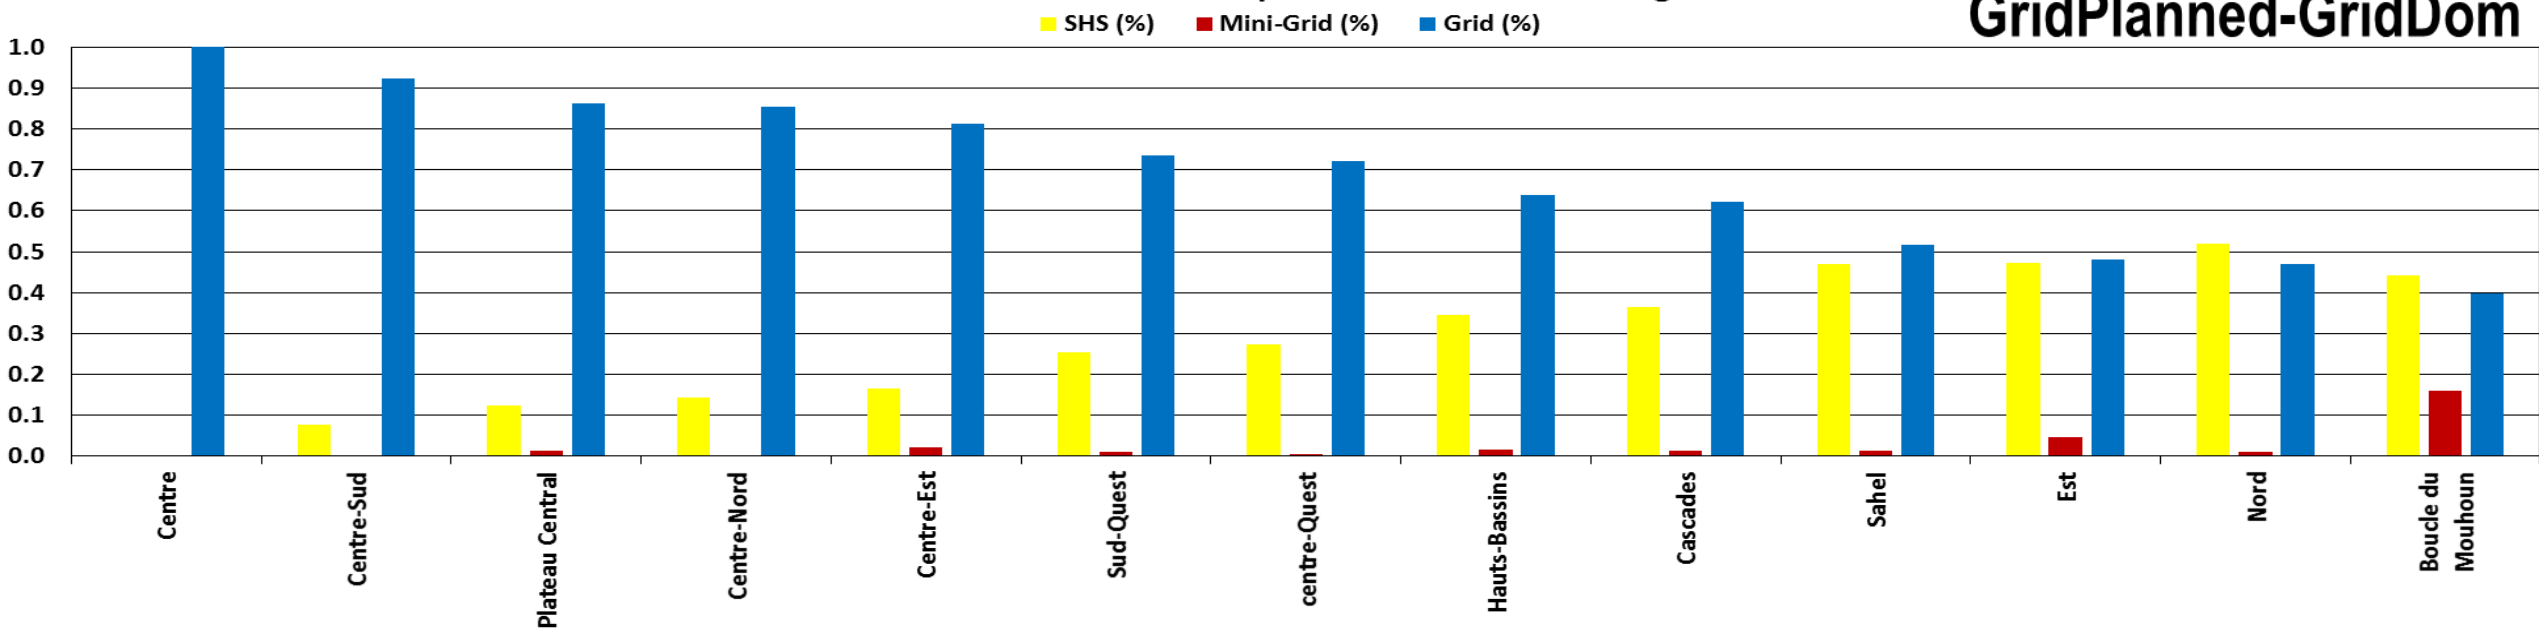

Share of electrification options in all Burkinabé regions

GridPlanned-SHSDom

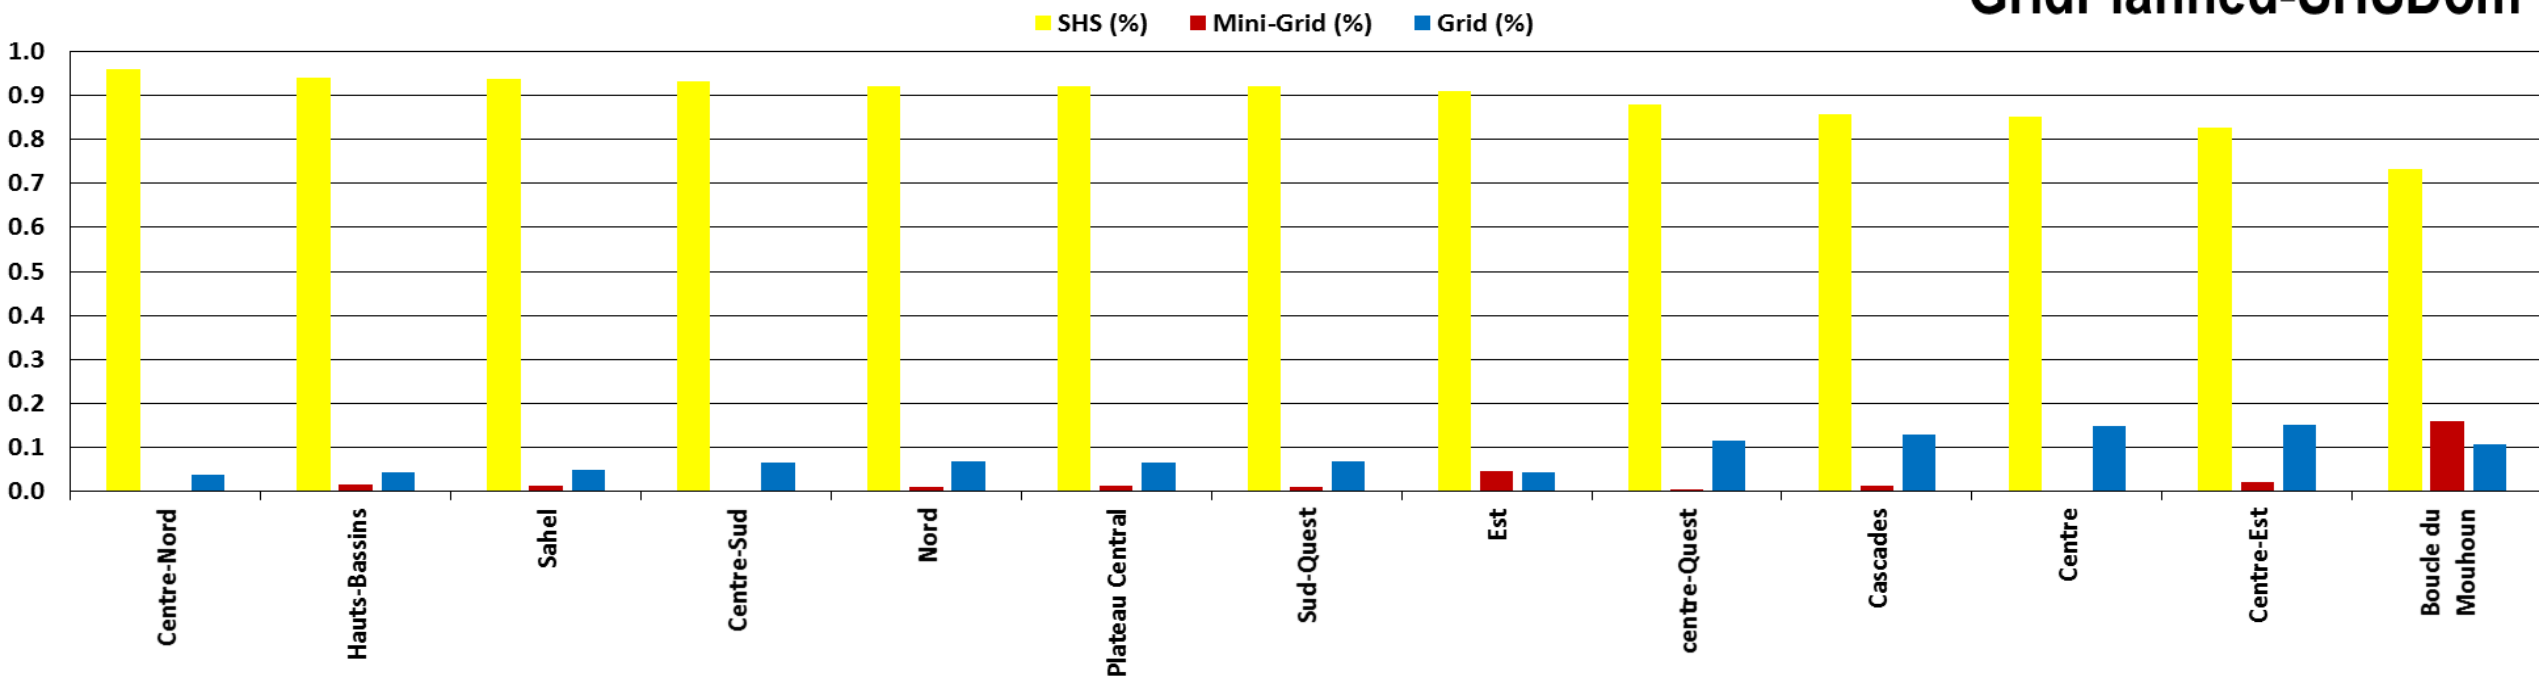

# Côte d'Ivoire

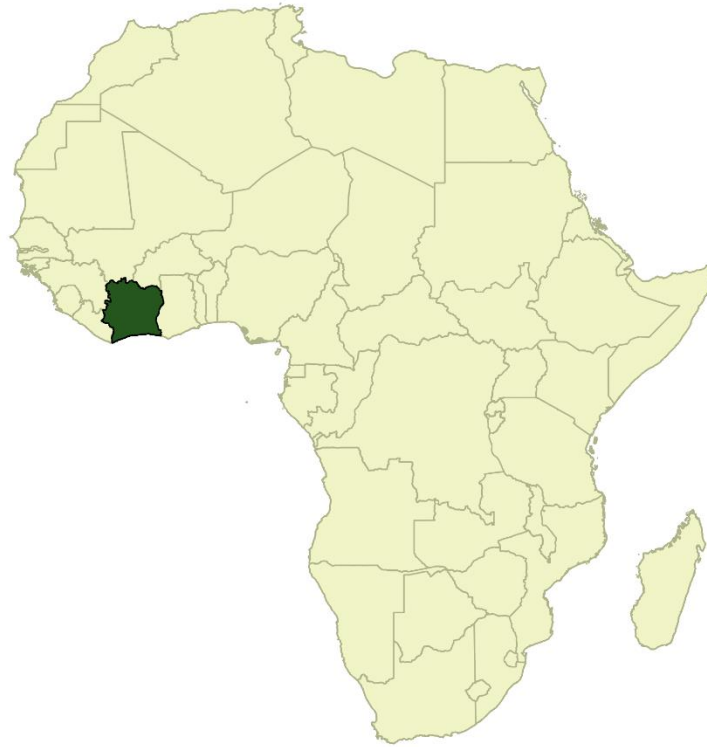

# Night light emission and Population of Ivorian regions

**Night light emission in Côte d'Ivoire**

Detected night lights

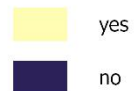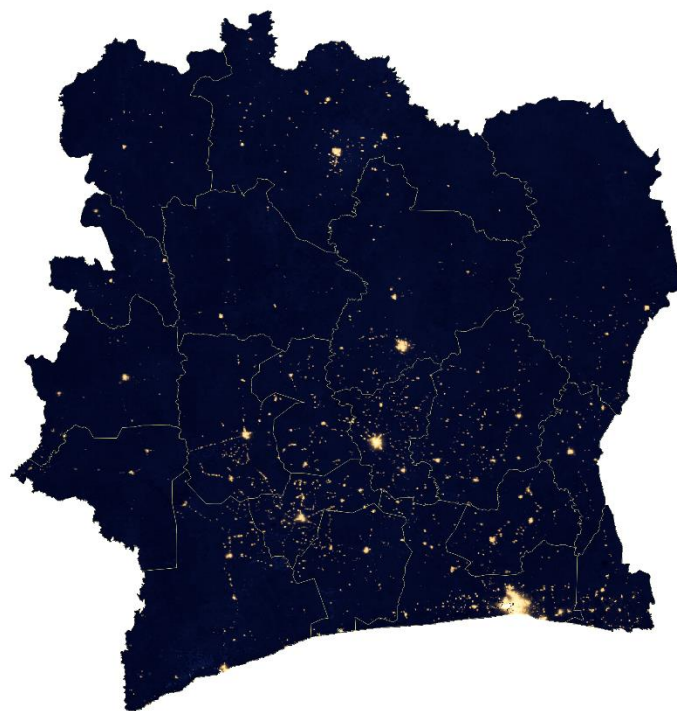

**Population structure of Côte d'Ivoire**

Population density (people/750x750m<sup>2</sup>)

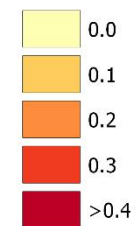

River and Lake

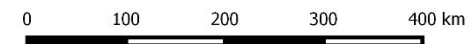

# Electrification option in all Ivorian regions: GridBuilt-GridDom

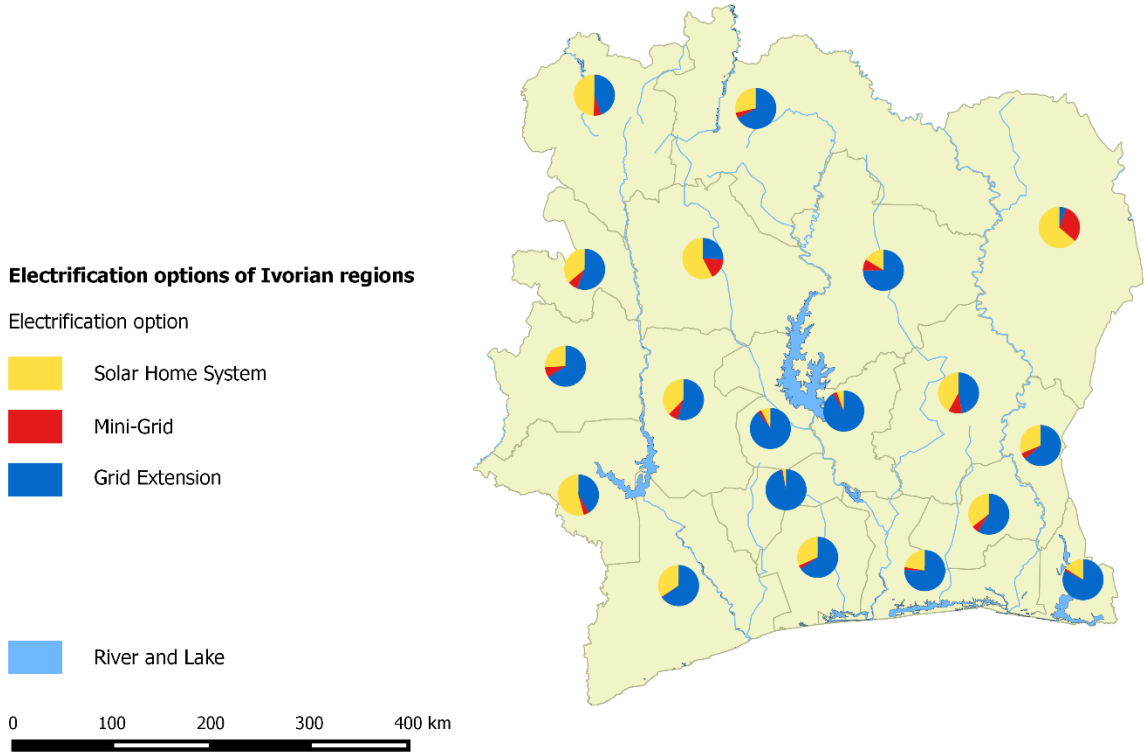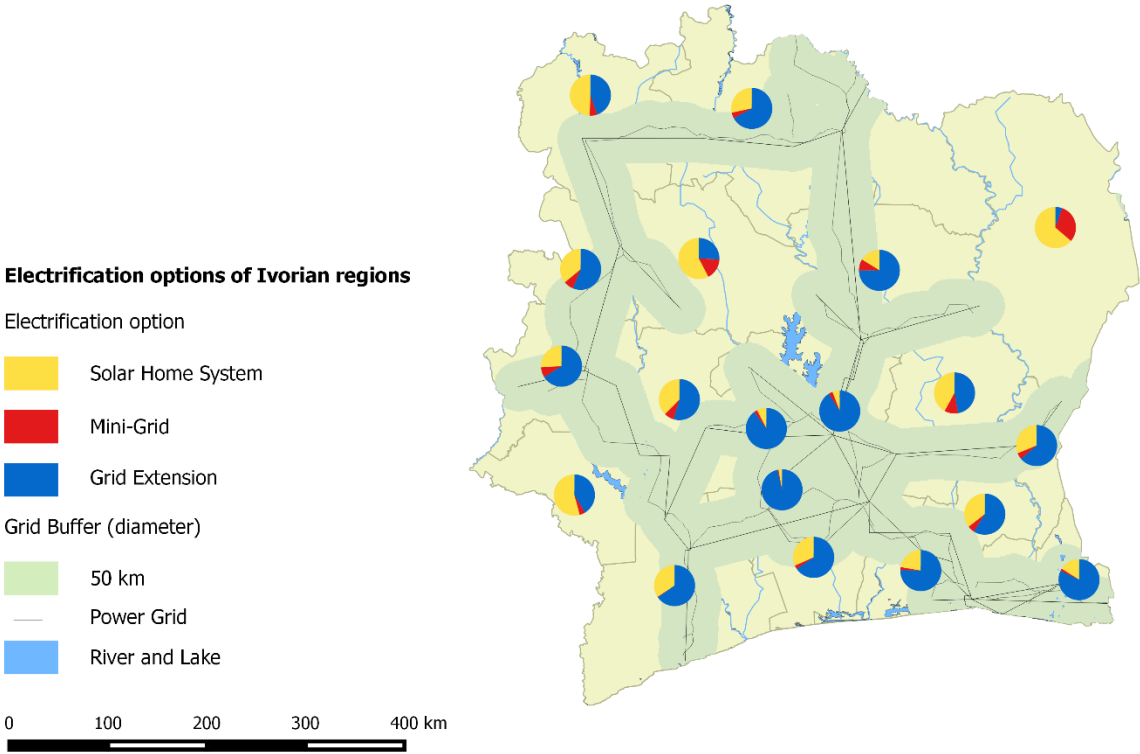

# Electrification option in all Ivorian regions: GridBuilt-SHSDom

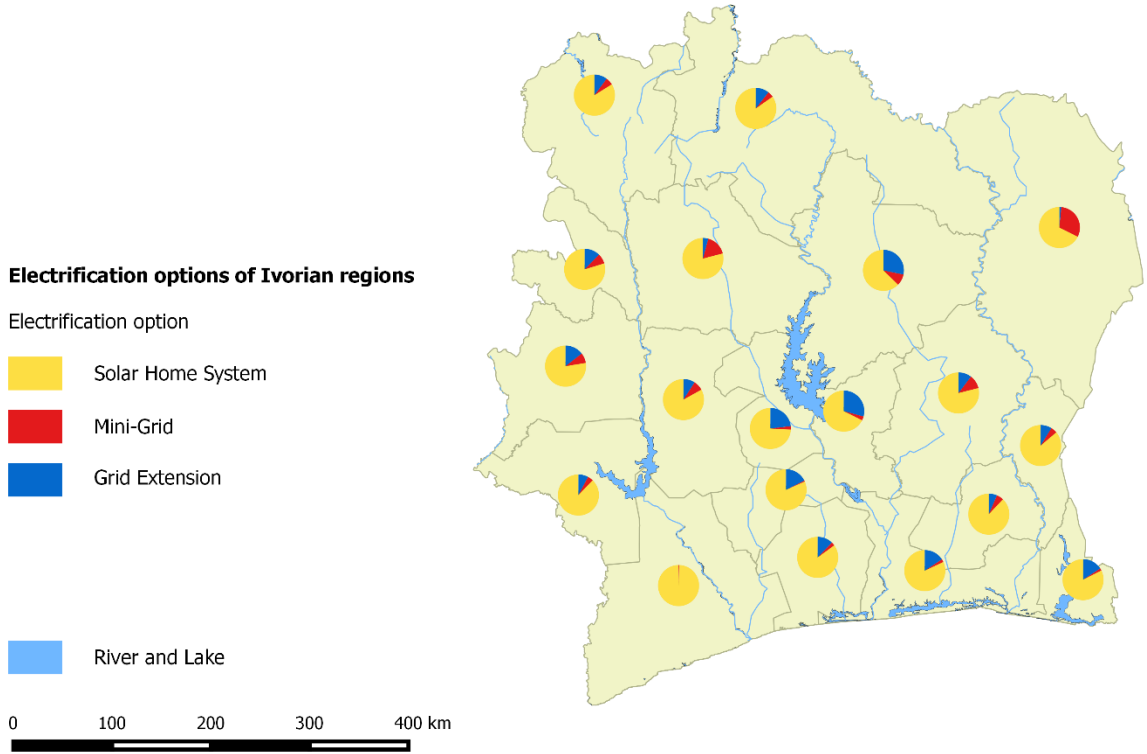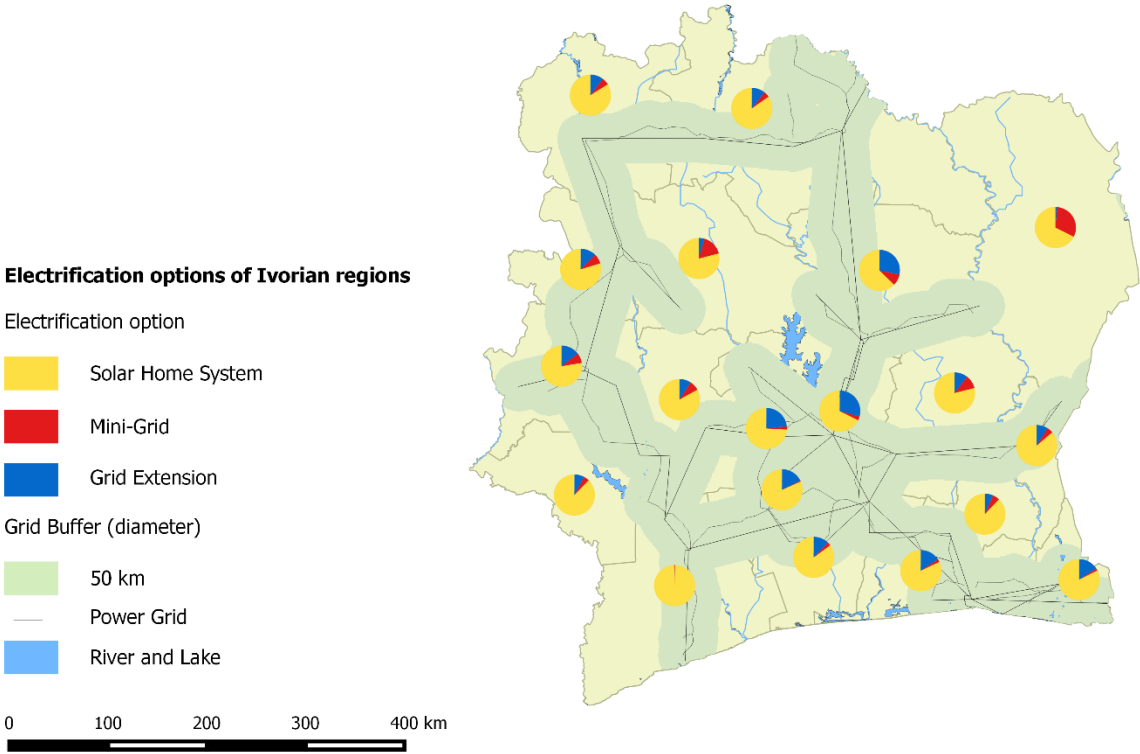

# Electrification option: GridBuilt-SHSDom

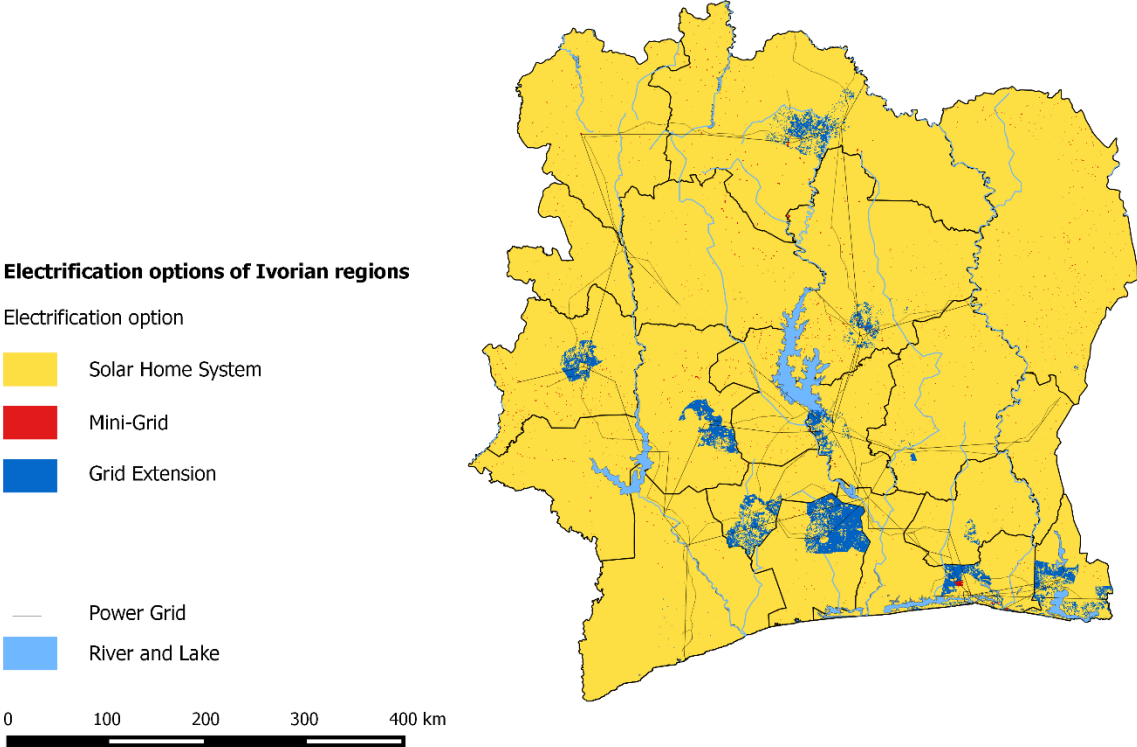

# Electrification option: GridBuilt-GridDom

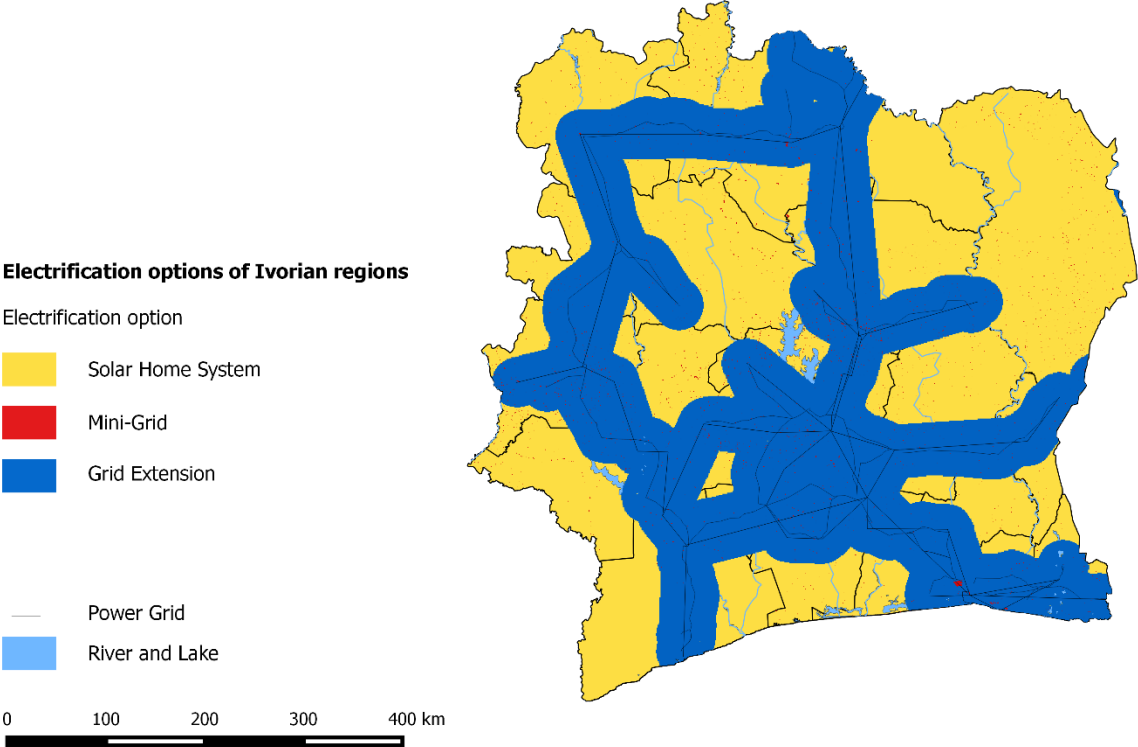

Share of electrification options in all Ivorian regions

GridBuilt-GridDom

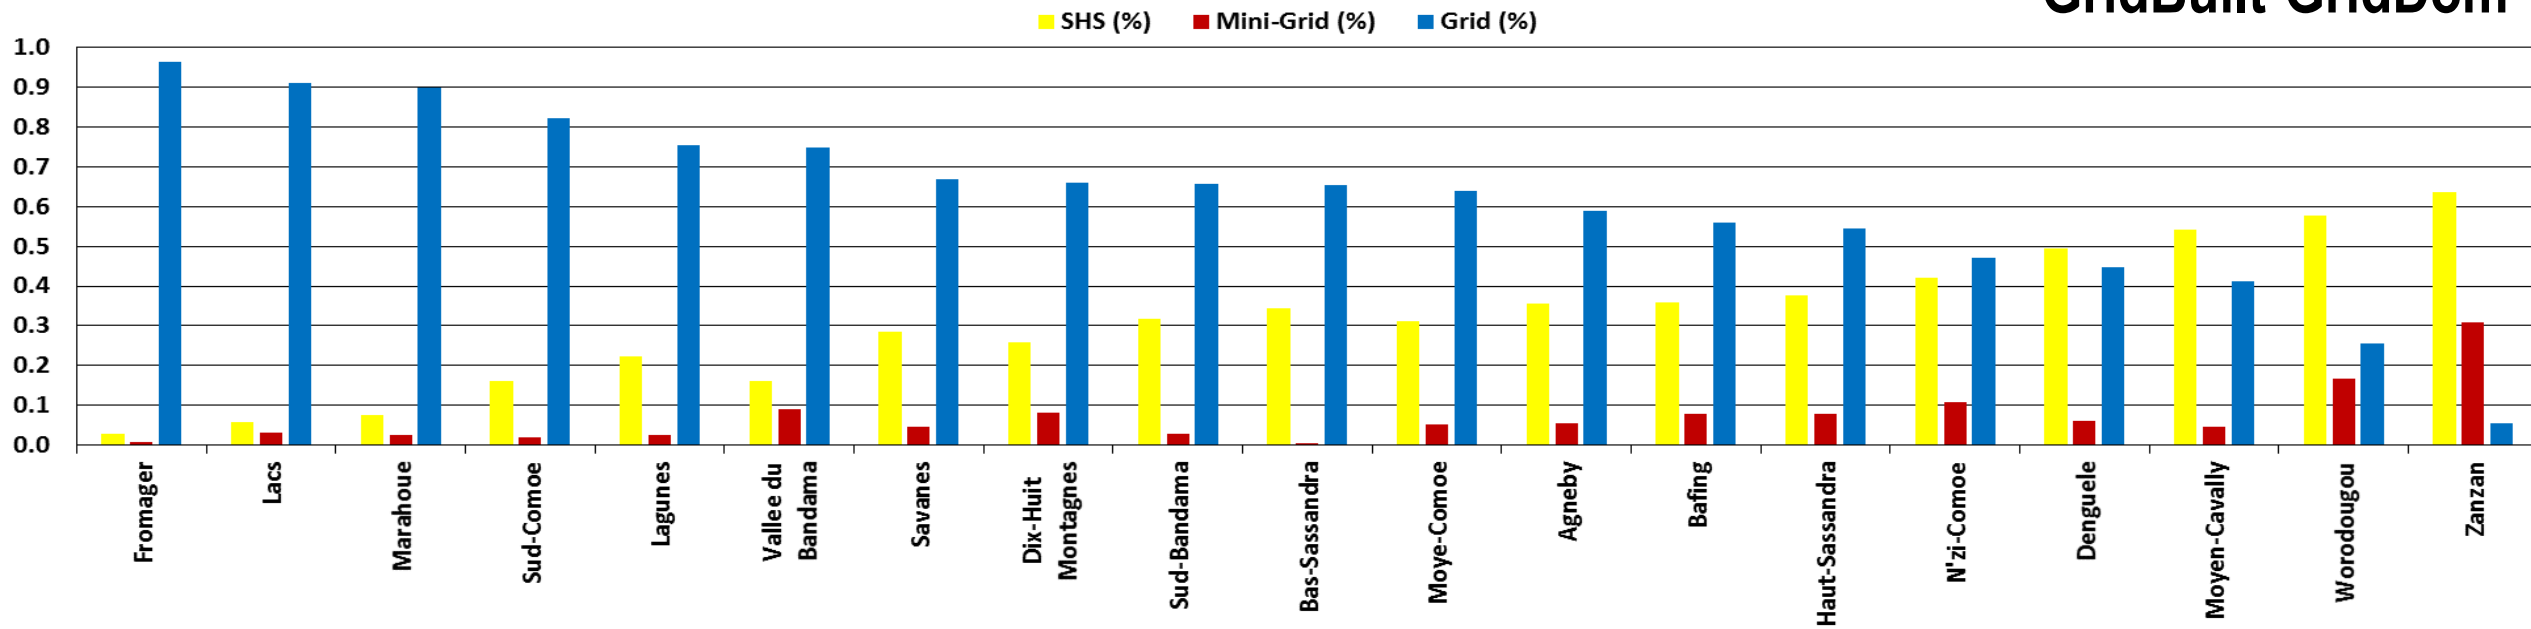

Share of electrification options in all Ivorian regions

GridBuilt-SHSDom

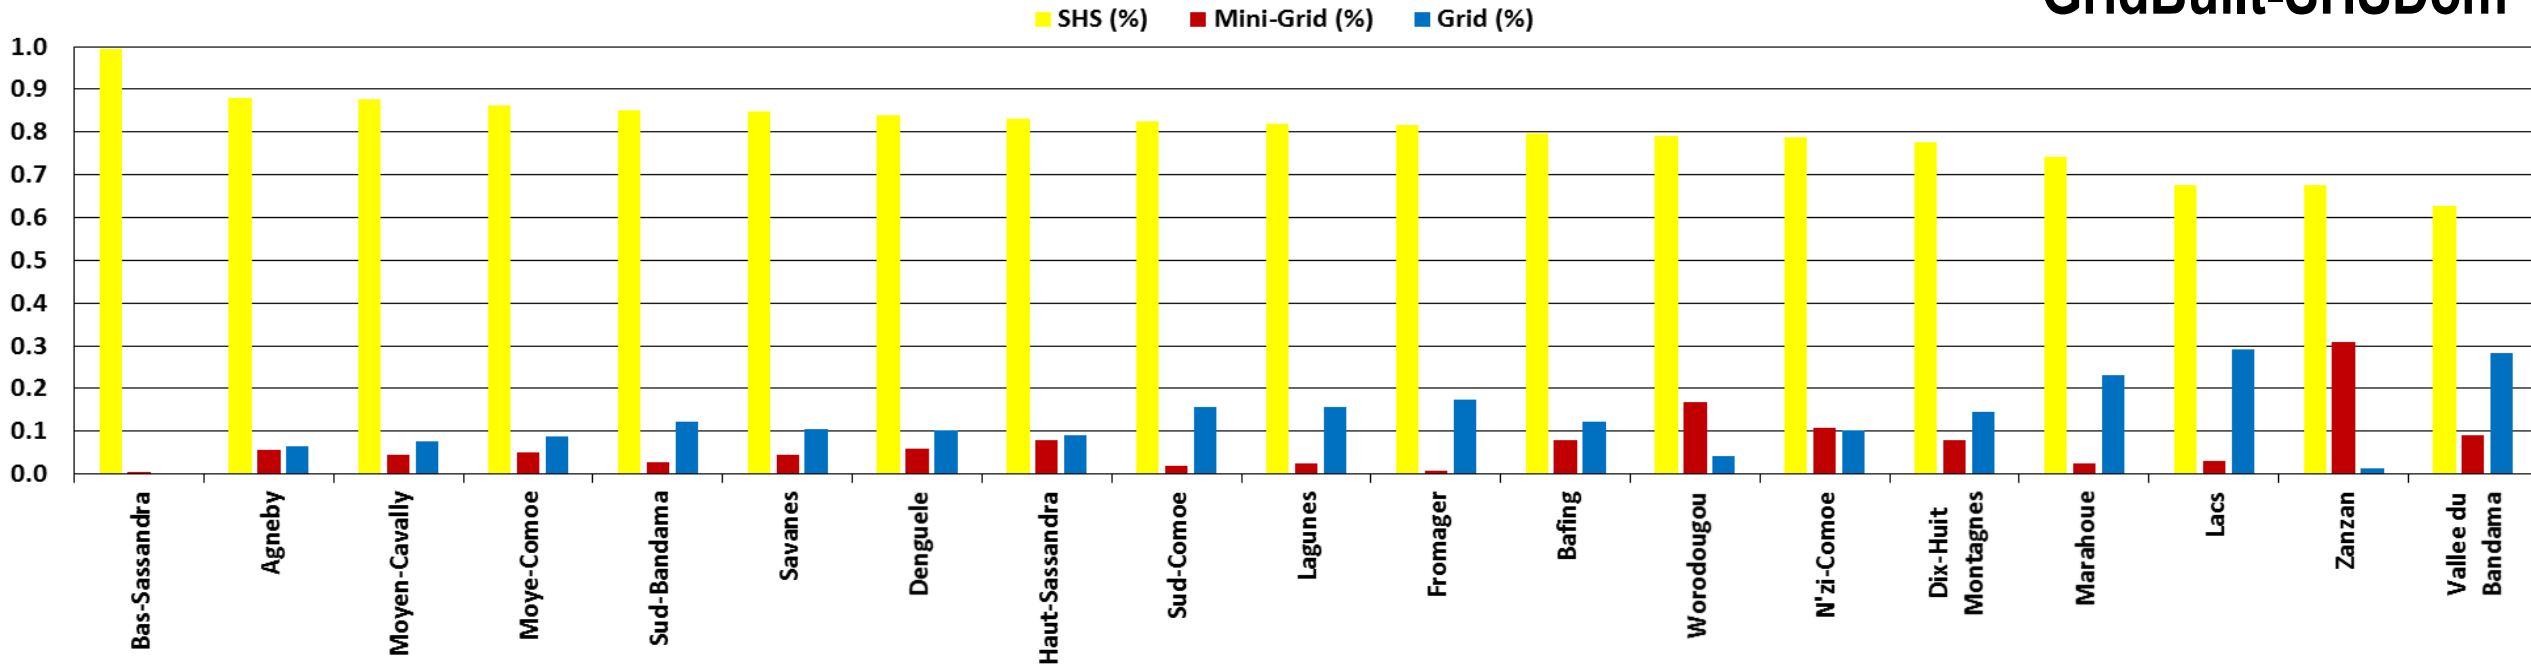

# Electrification option in all Ivorian regions: GridPlanned-GridDom

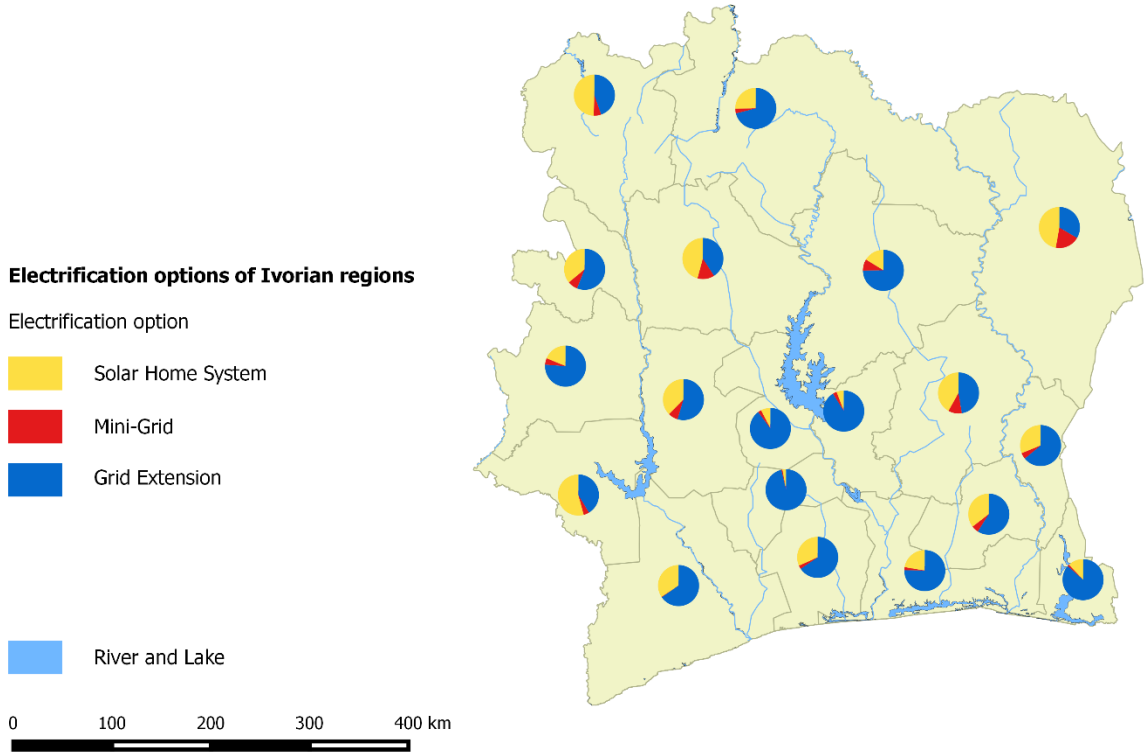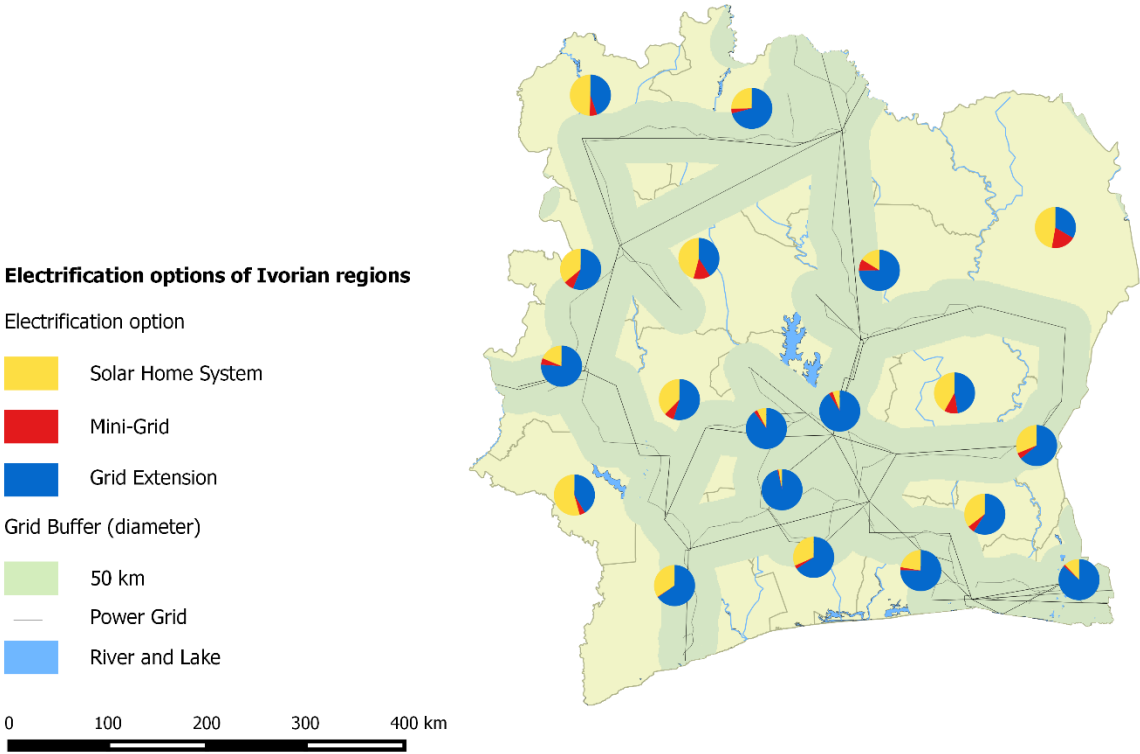

# Electrification option in all Ivorian regions: GridPlanned-SHSDom

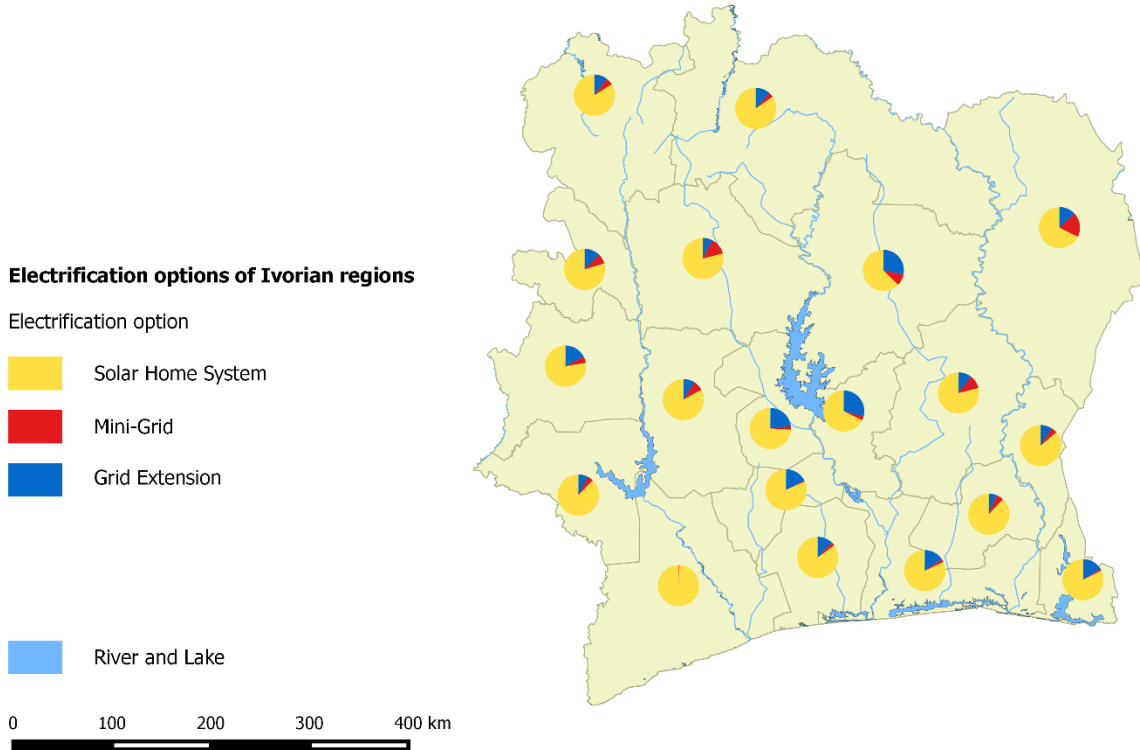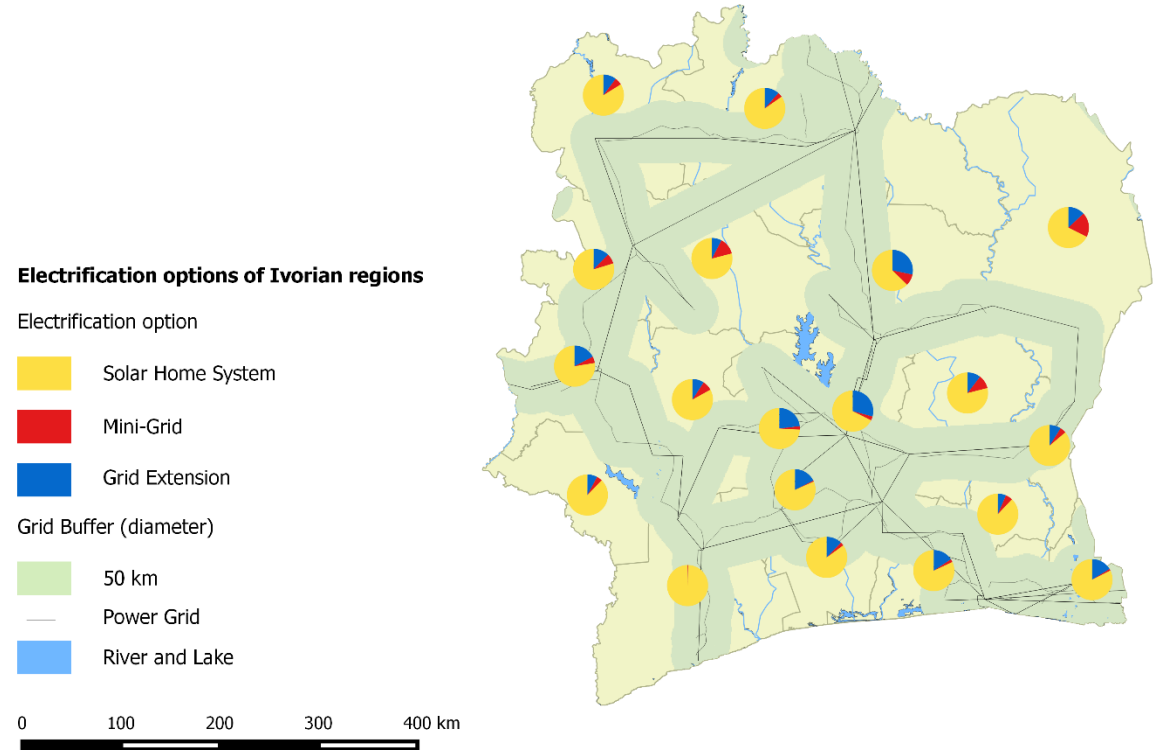

# Electrification option: GridPlanned-SHSDom

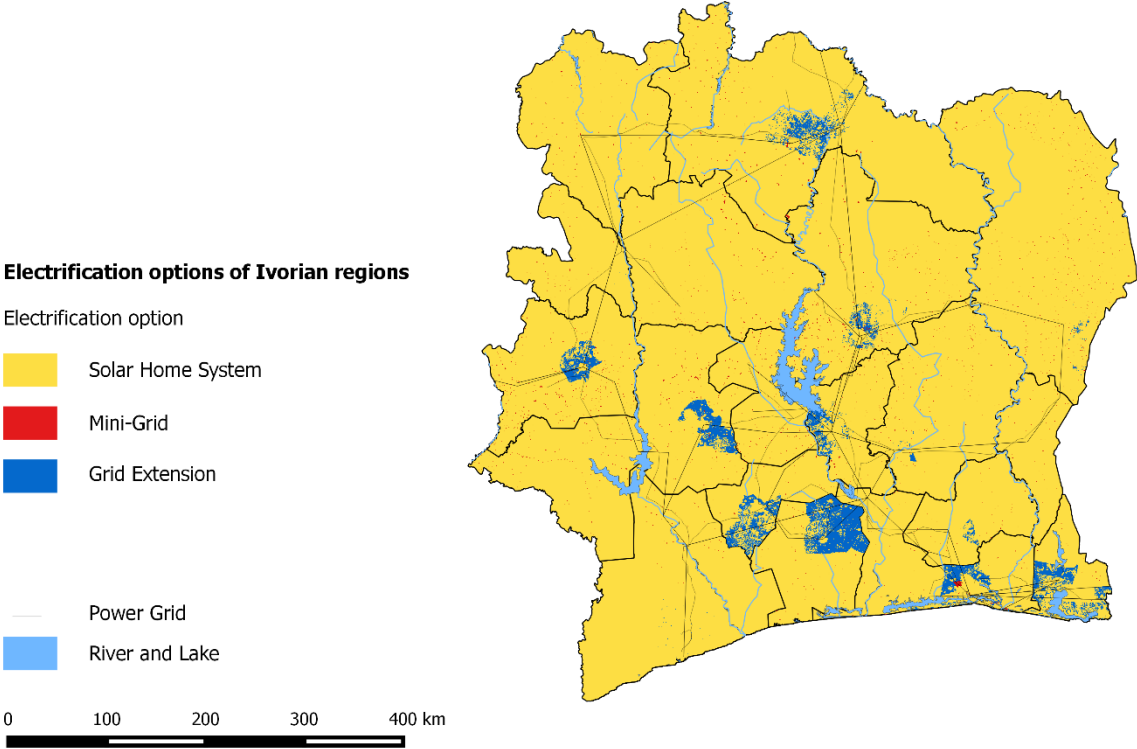

# Electrification option: GridPlanned-GridDom

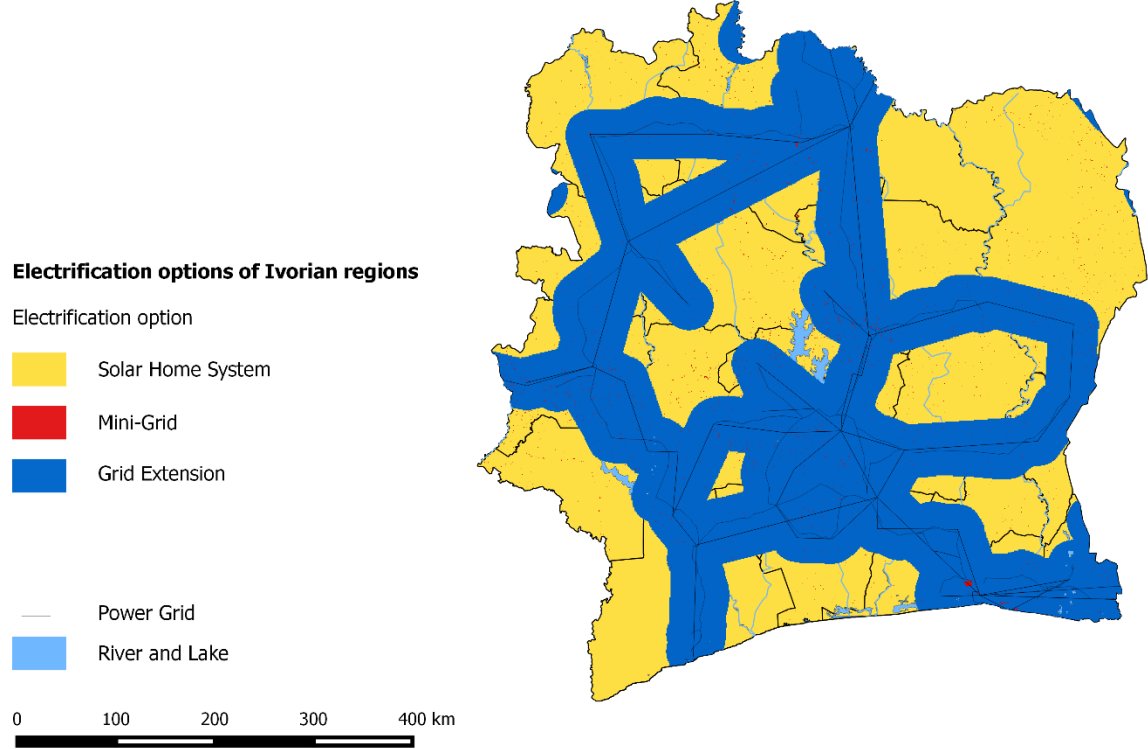

Share of electrification options in all Ivorian regions

SHS (%) Mini-Grid (%) Grid (%)

GridPlanned-GridDom

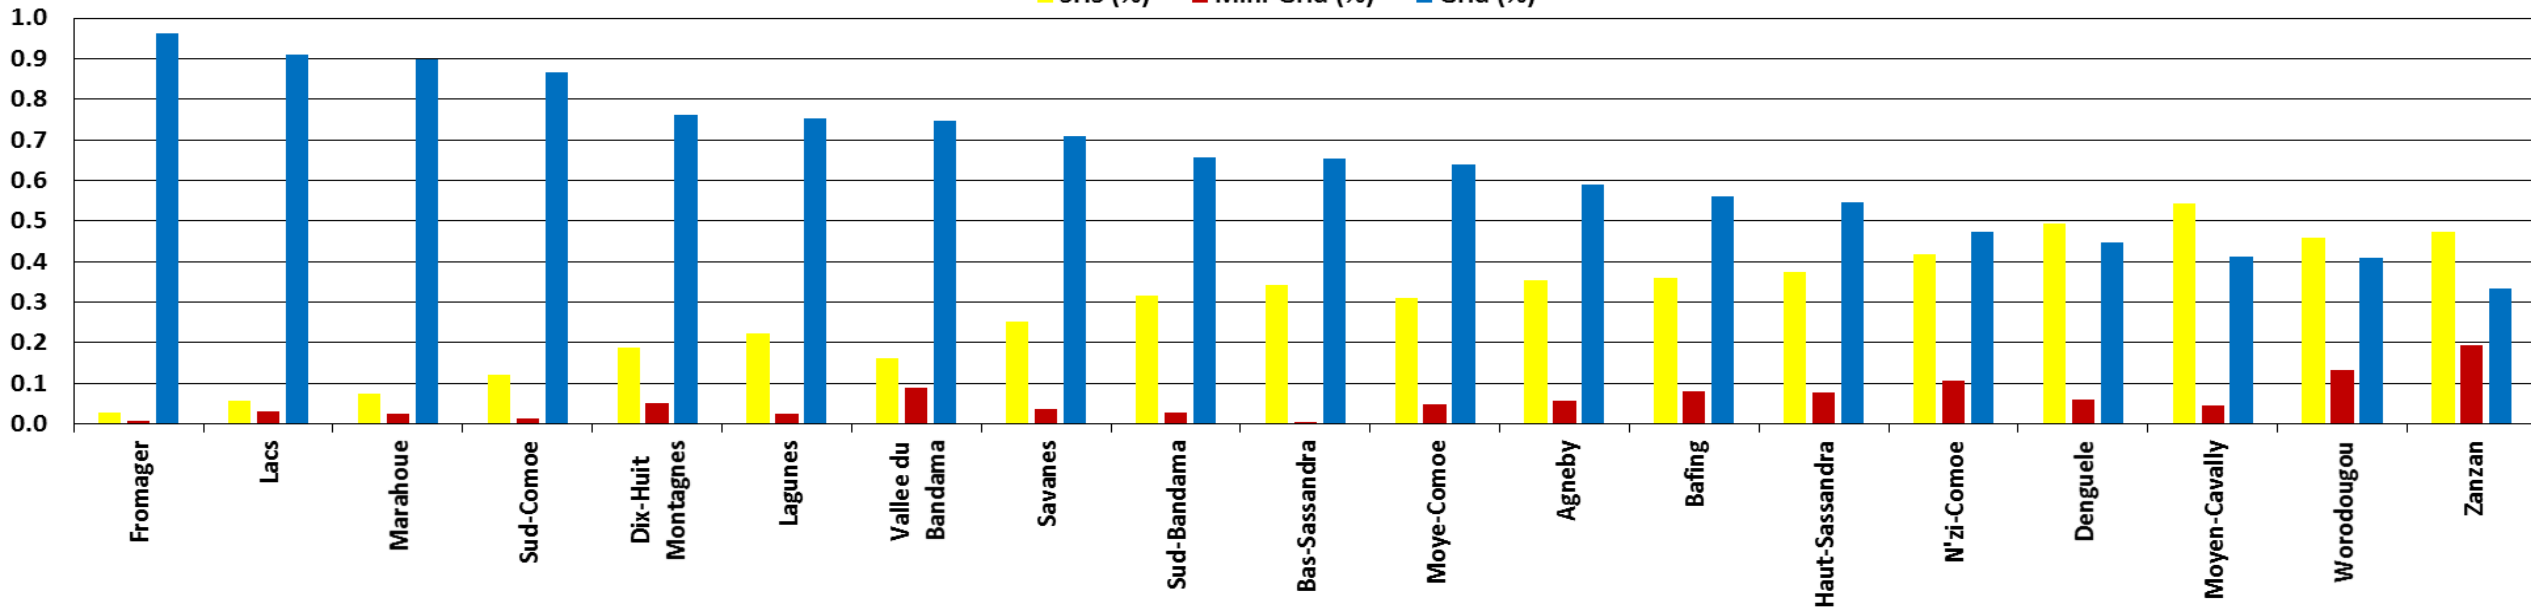

Share of electrification options in all Ivorian regions

SHS (%) Mini-Grid (%) Grid (%)

GridPlanned-SHSDom

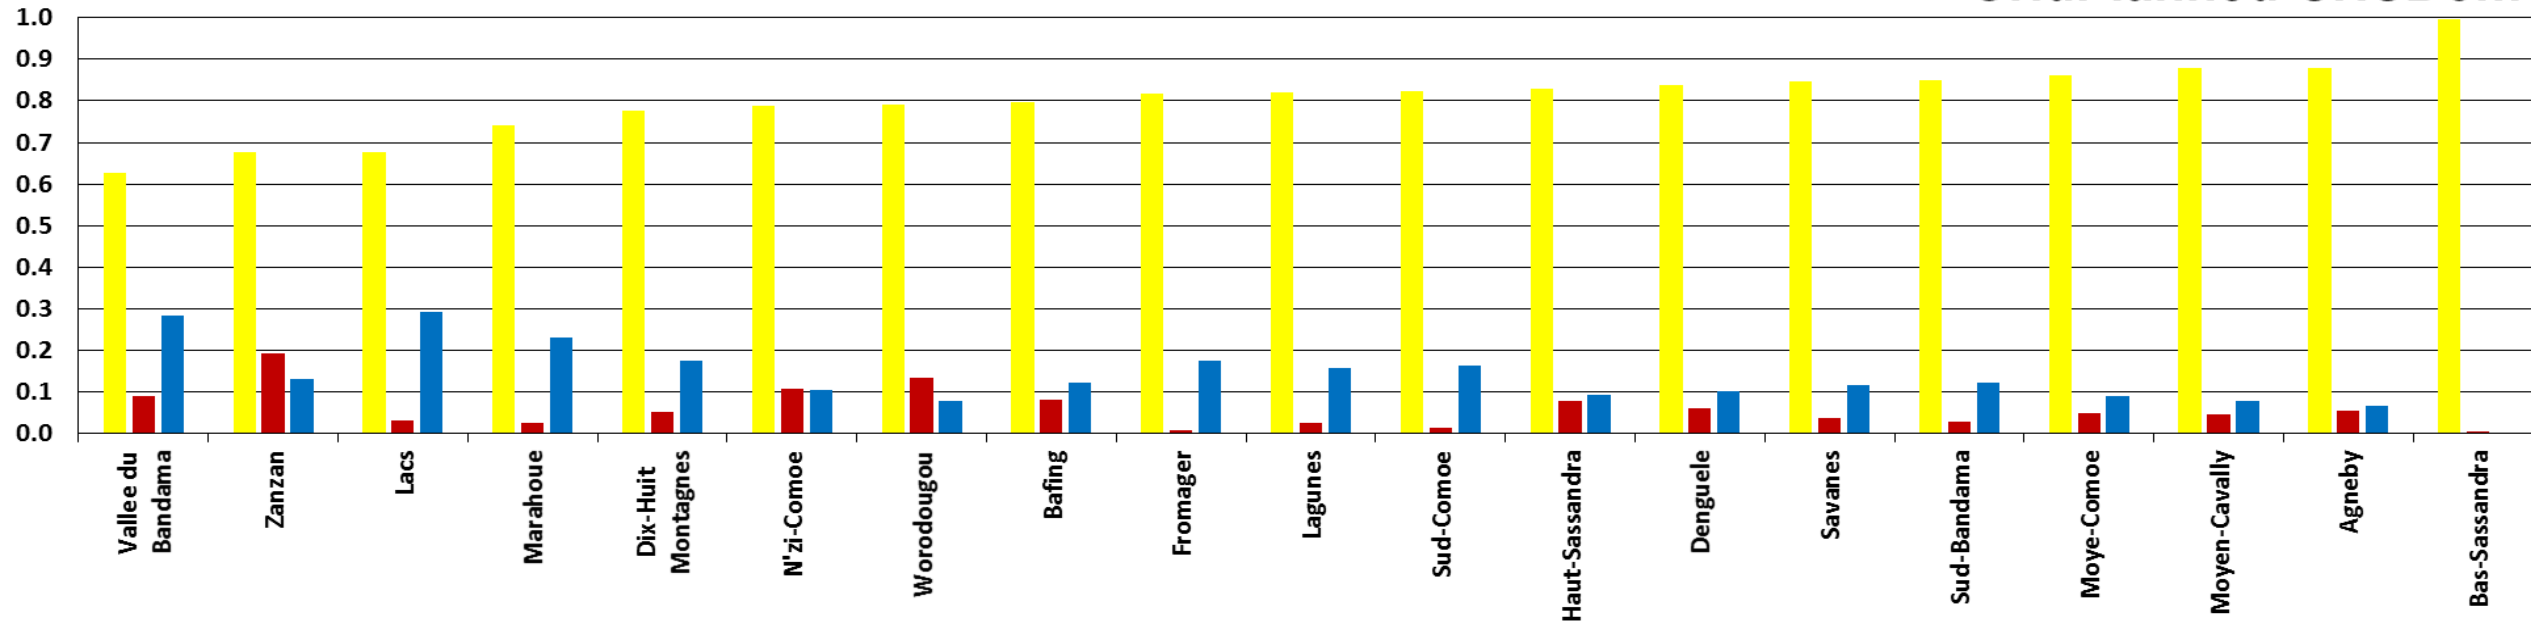

# Gambia

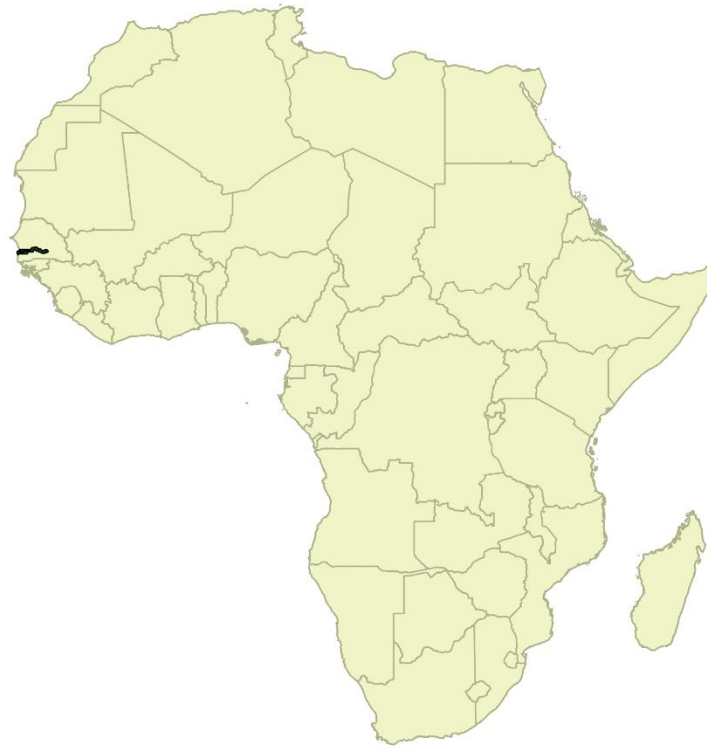

# Night light emission and Population of Gambian regions

## Night light emission in Gambia

Detected night lights

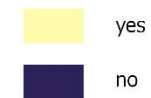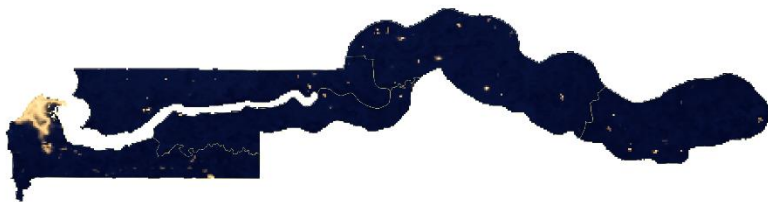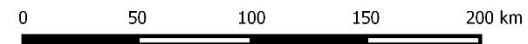

## Population structure of Gambia

Population density (people/750x750m<sup>2</sup>)

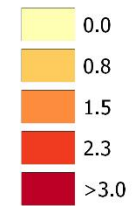

Ocean, river and lake (blue)

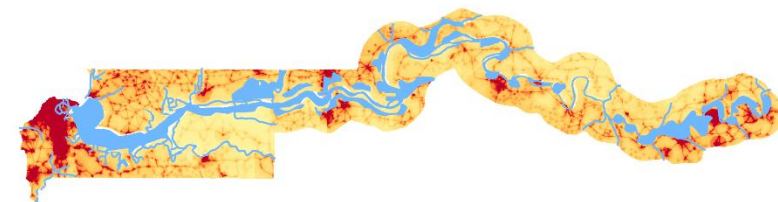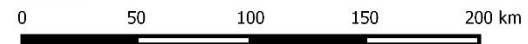

# Electrification option in all Gambian regions: GridBuilt-GridDom

## Electrification options of Gambian regions

Electrification option

-  Solar Home System
-  Mini-Grid
-  Grid Extension

 Ocean, river and lake

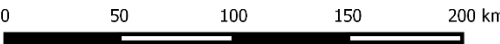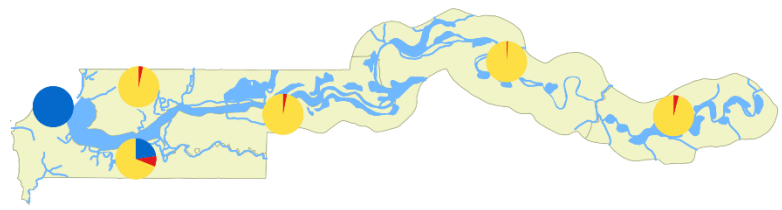

## Electrification options of Gambian regions

Electrification option

-  Solar Home System
-  Mini-Grid
-  Grid Extension

Grid Buffer (diameter)

-  50 km
-  Power Grid
-  Ocean, river and lake

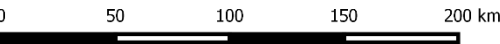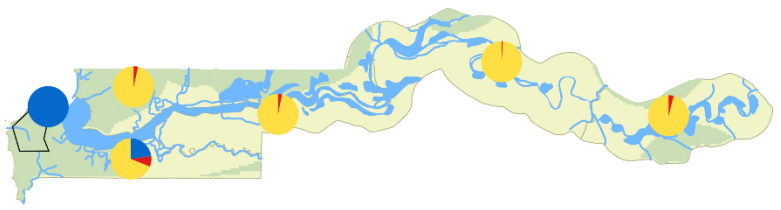

# Electrification option in all Gambian regions: GridBuilt-SHSDom

## Electrification options of Gambian regions

Electrification option

-  Solar Home System
-  Mini-Grid
-  Grid Extension

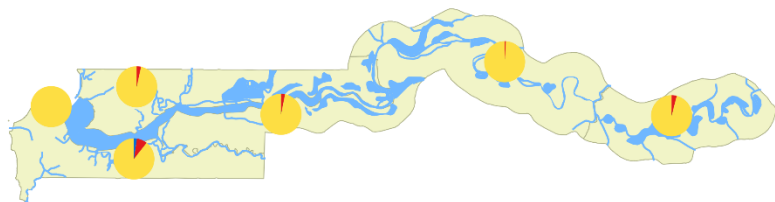

0 50 100 150 200 km

## Electrification options of Gambian regions

Electrification option

-  Solar Home System
-  Mini-Grid
-  Grid Extension

Grid Buffer (diameter)

-  50 km
-  Power Grid
-  Ocean, river and lake

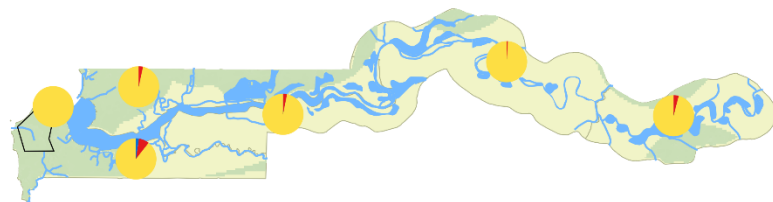

0 50 100 150 200 km

# Electrification option: GridBuilt-SHSDom

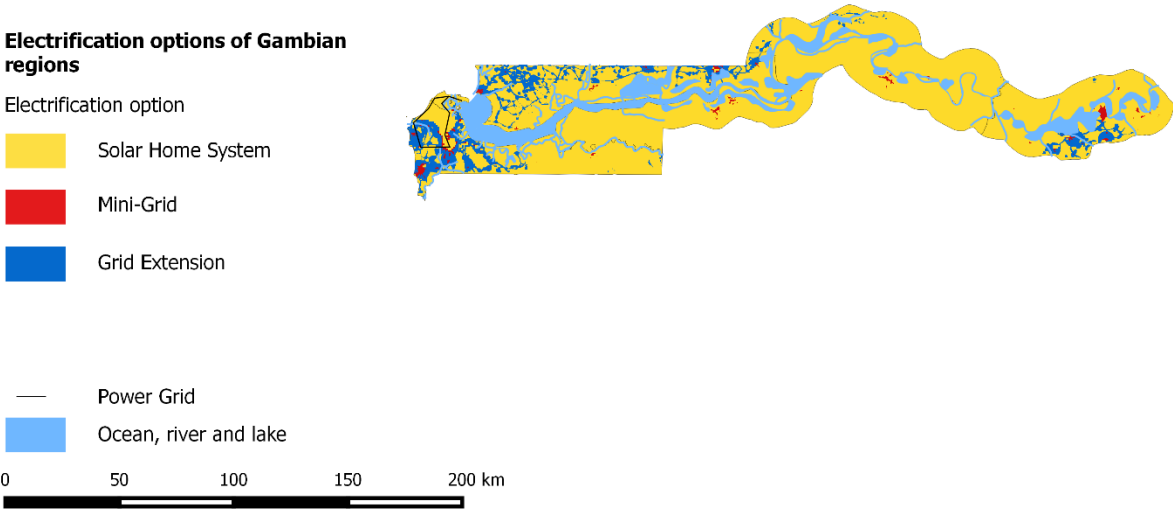

# Electrification option: GridBuilt-GridDom

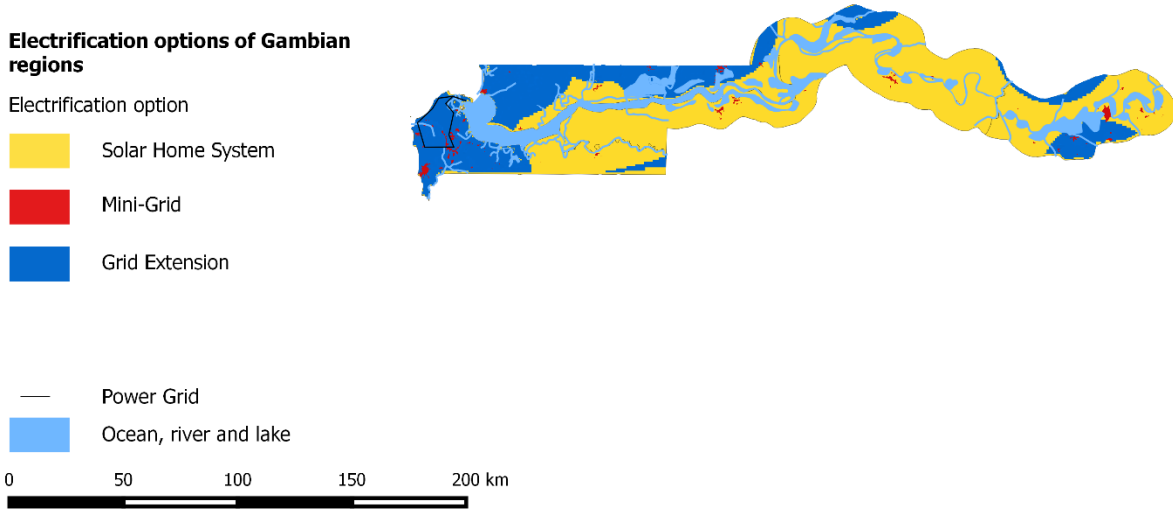

Share of electrification options in all Gambian regions

SHS (%) Mini-Grid (%) Grid (%)

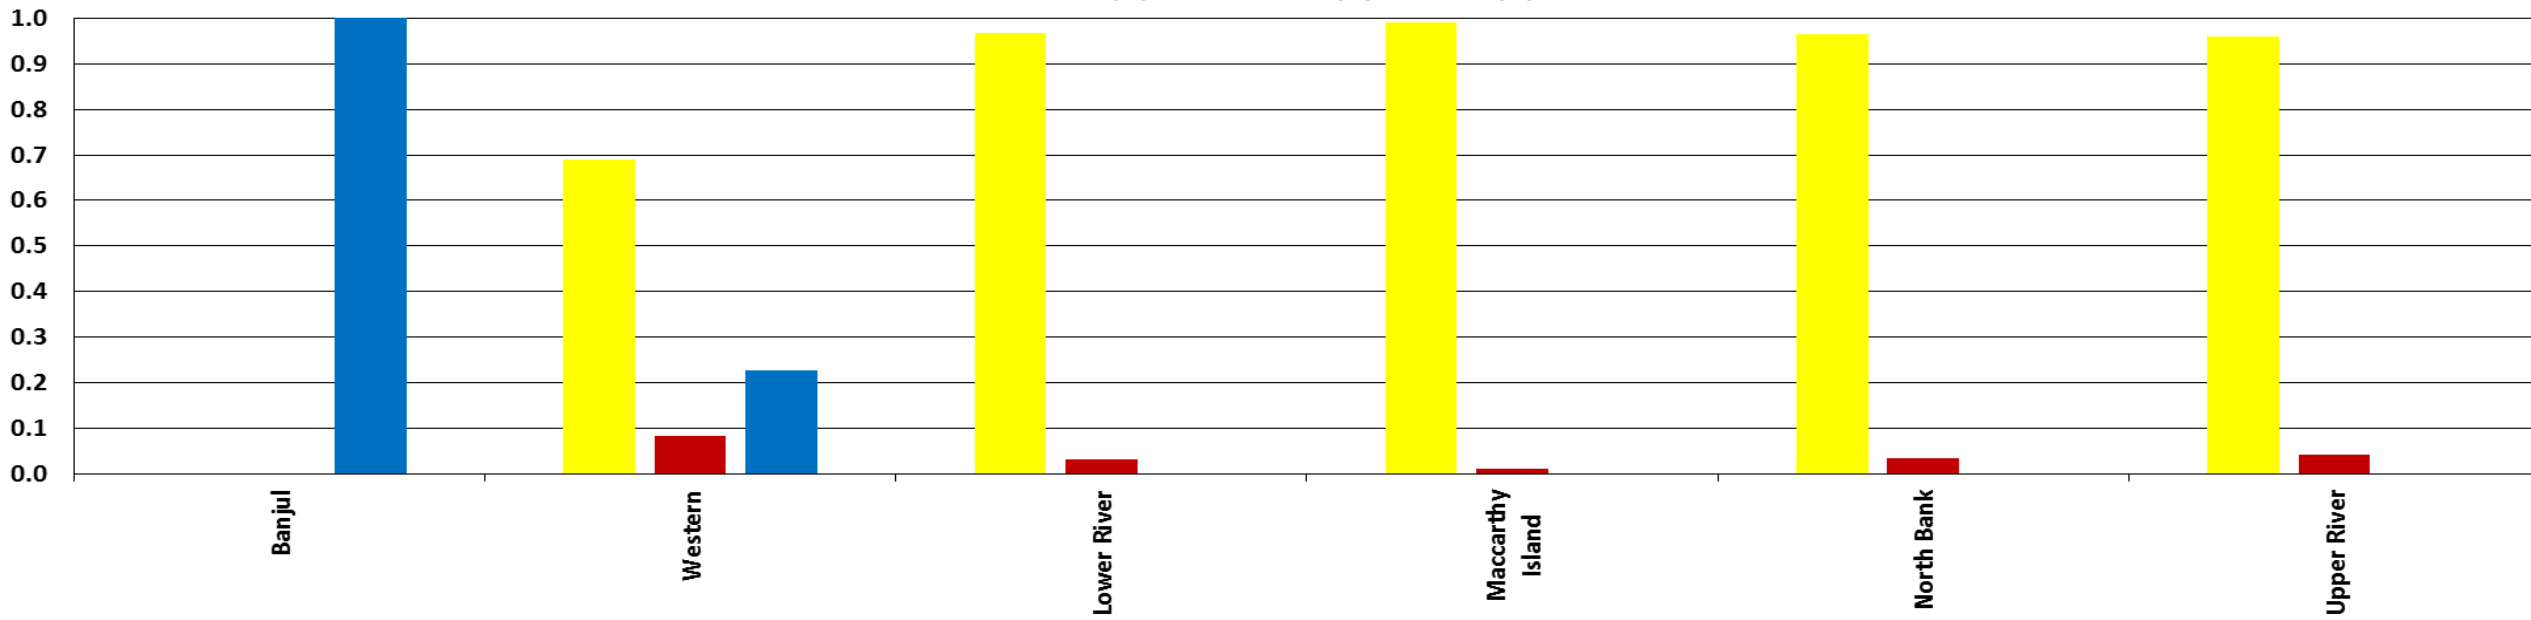

GridBuilt-GridDom

Share of electrification options in all Gambian regions

SHS (%) Mini-Grid (%) Grid (%)

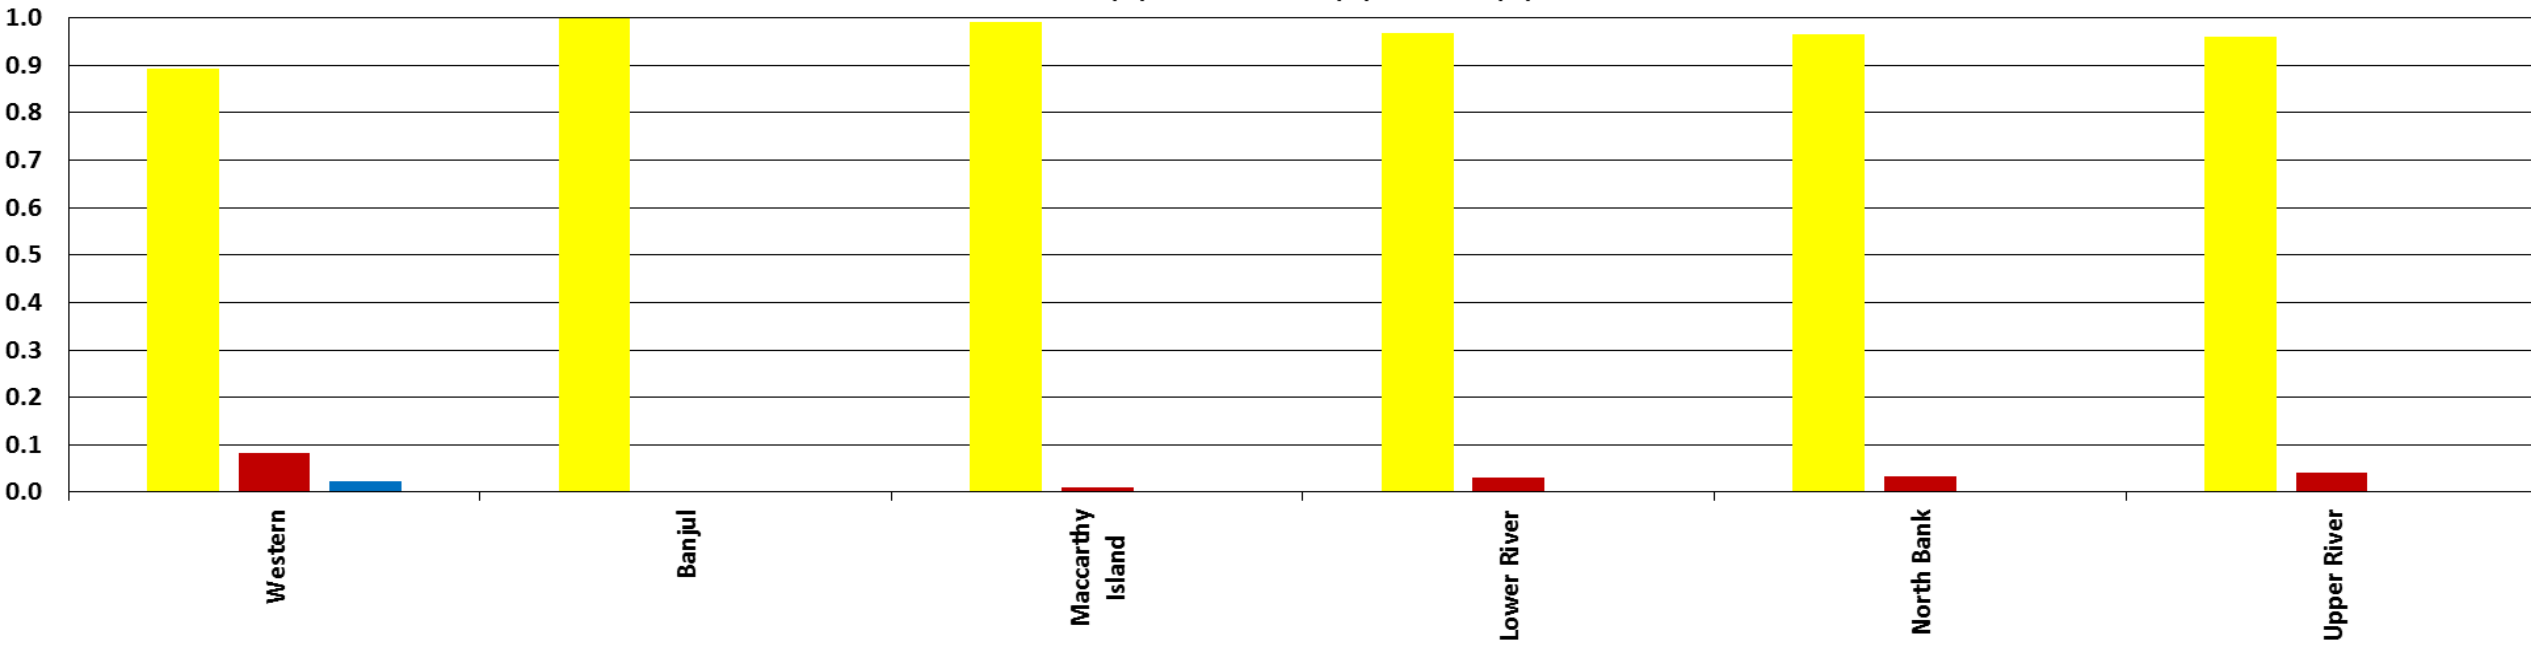

GridBuilt-SHSDom

# Electrification option in all Gambian regions: GridPlanned-GridDom

**Electrification options of Gambian regions**

- Electrification option
- Solar Home System
  - Mini-Grid
  - Grid Extension

Ocean, river and lake

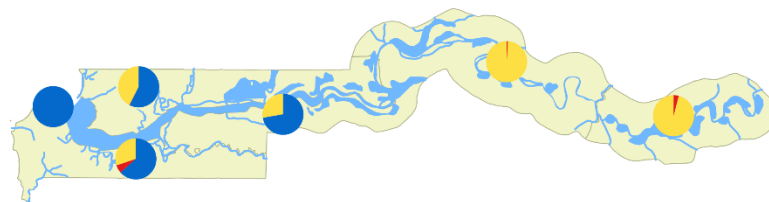

**Electrification options of Gambian regions**

- Electrification option
- Solar Home System
  - Mini-Grid
  - Grid Extension

- Grid Buffer (diameter)
- 50 km
  - Power Grid
  - Ocean, river and lake

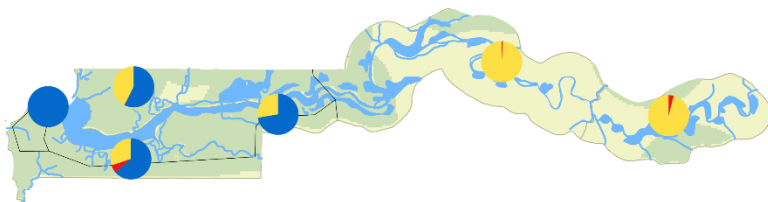

# Electrification option in all Gambian regions: GridPlanned-SHSDom

## Electrification options of Gambian regions

- Electrification option
- Solar Home System
  - Mini-Grid
  - Grid Extension

Ocean, river and lake

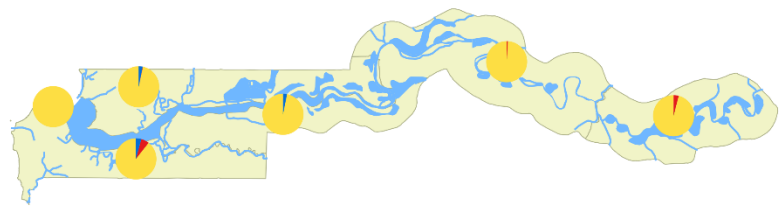

## Electrification options of Gambian regions

- Electrification option
- Solar Home System
  - Mini-Grid
  - Grid Extension

- Grid Buffer (diameter)
- 50 km
  - Power Grid
  - Ocean, river and lake

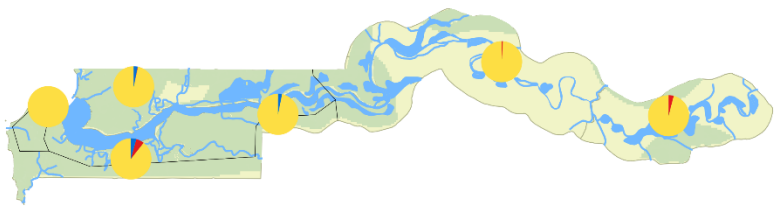

# Electrification option: GridPlanned-SHSDom

# Electrification option: GridPlanned-GridDom

Electrification options of Gambian regions

- Electrification option
- Solar Home System
  - Mini-Grid
  - Grid Extension

- Power Grid
- Ocean, river and lake

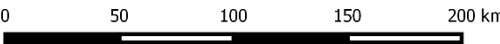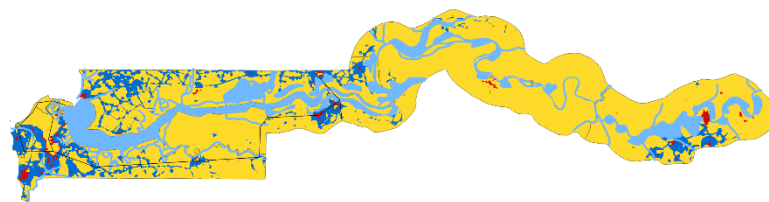

Electrification options of Gambian regions

- Electrification option
- Solar Home System
  - Mini-Grid
  - Grid Extension

- Power Grid
- Ocean, river and lake

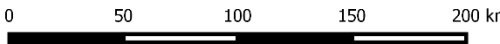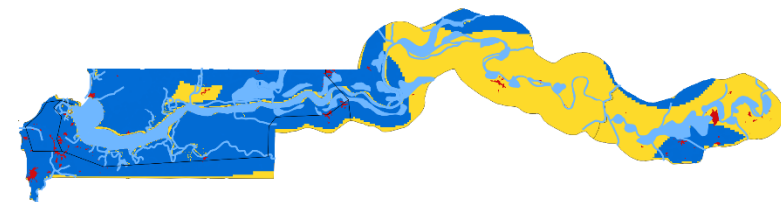

Share of electrification options in all Gambian regions

SHS (%) Mini-Grid (%) Grid (%)

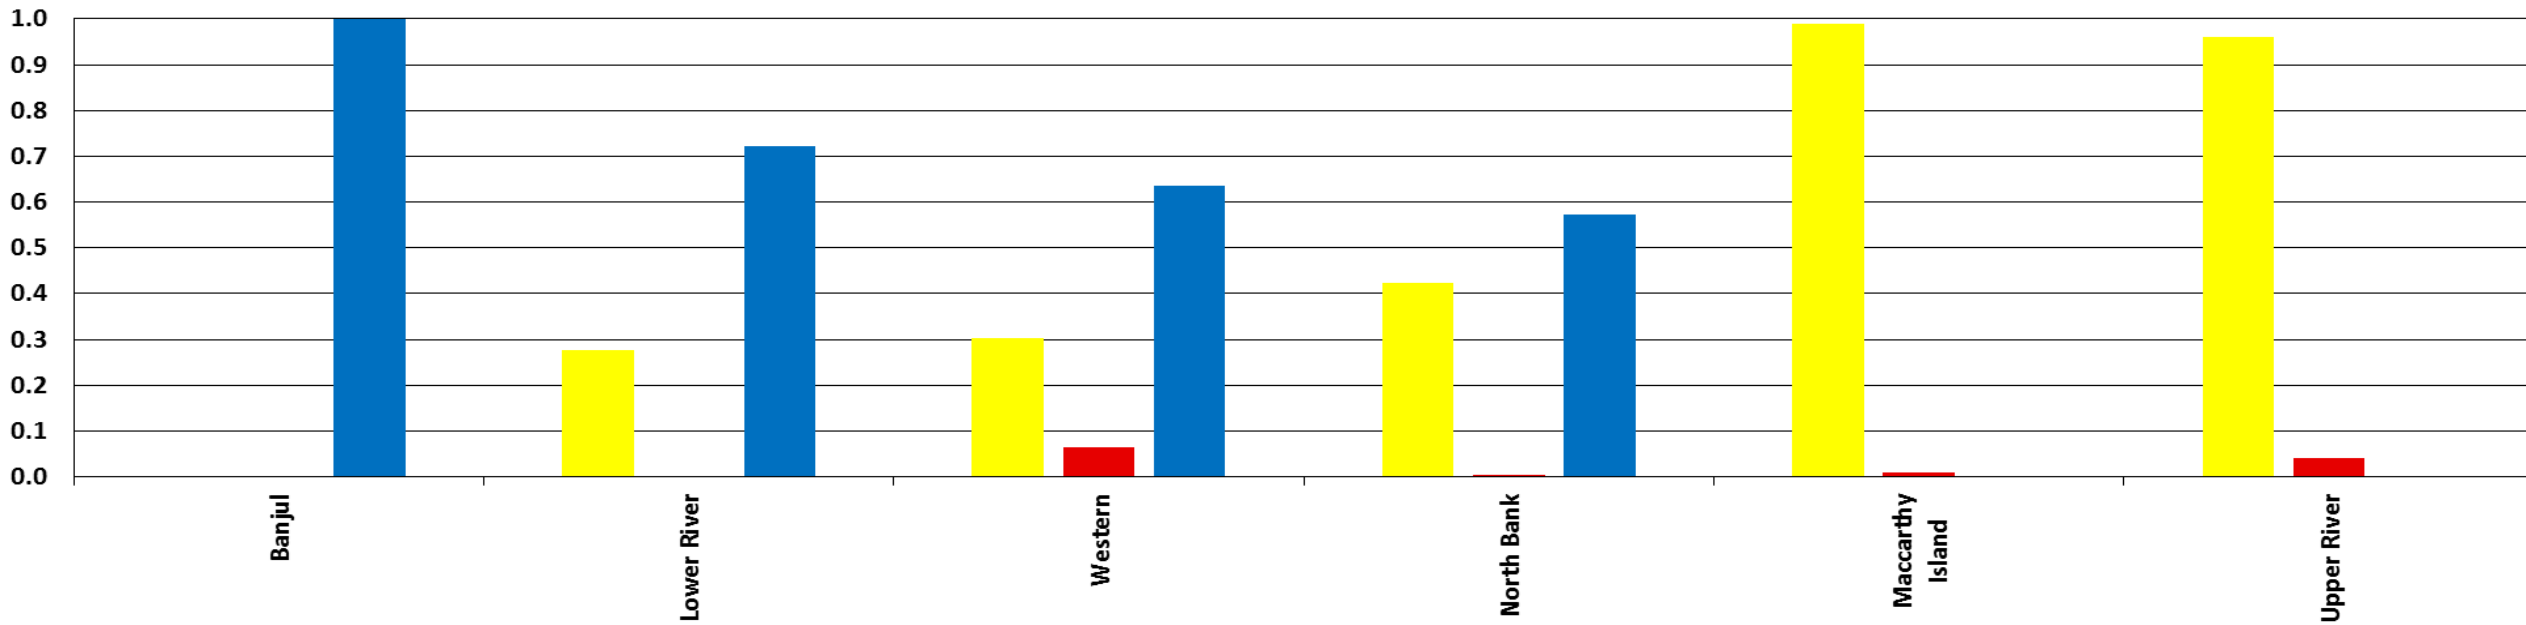

Share of electrification options in all Gambian regions

SHS (%) Mini-Grid (%) Grid (%)

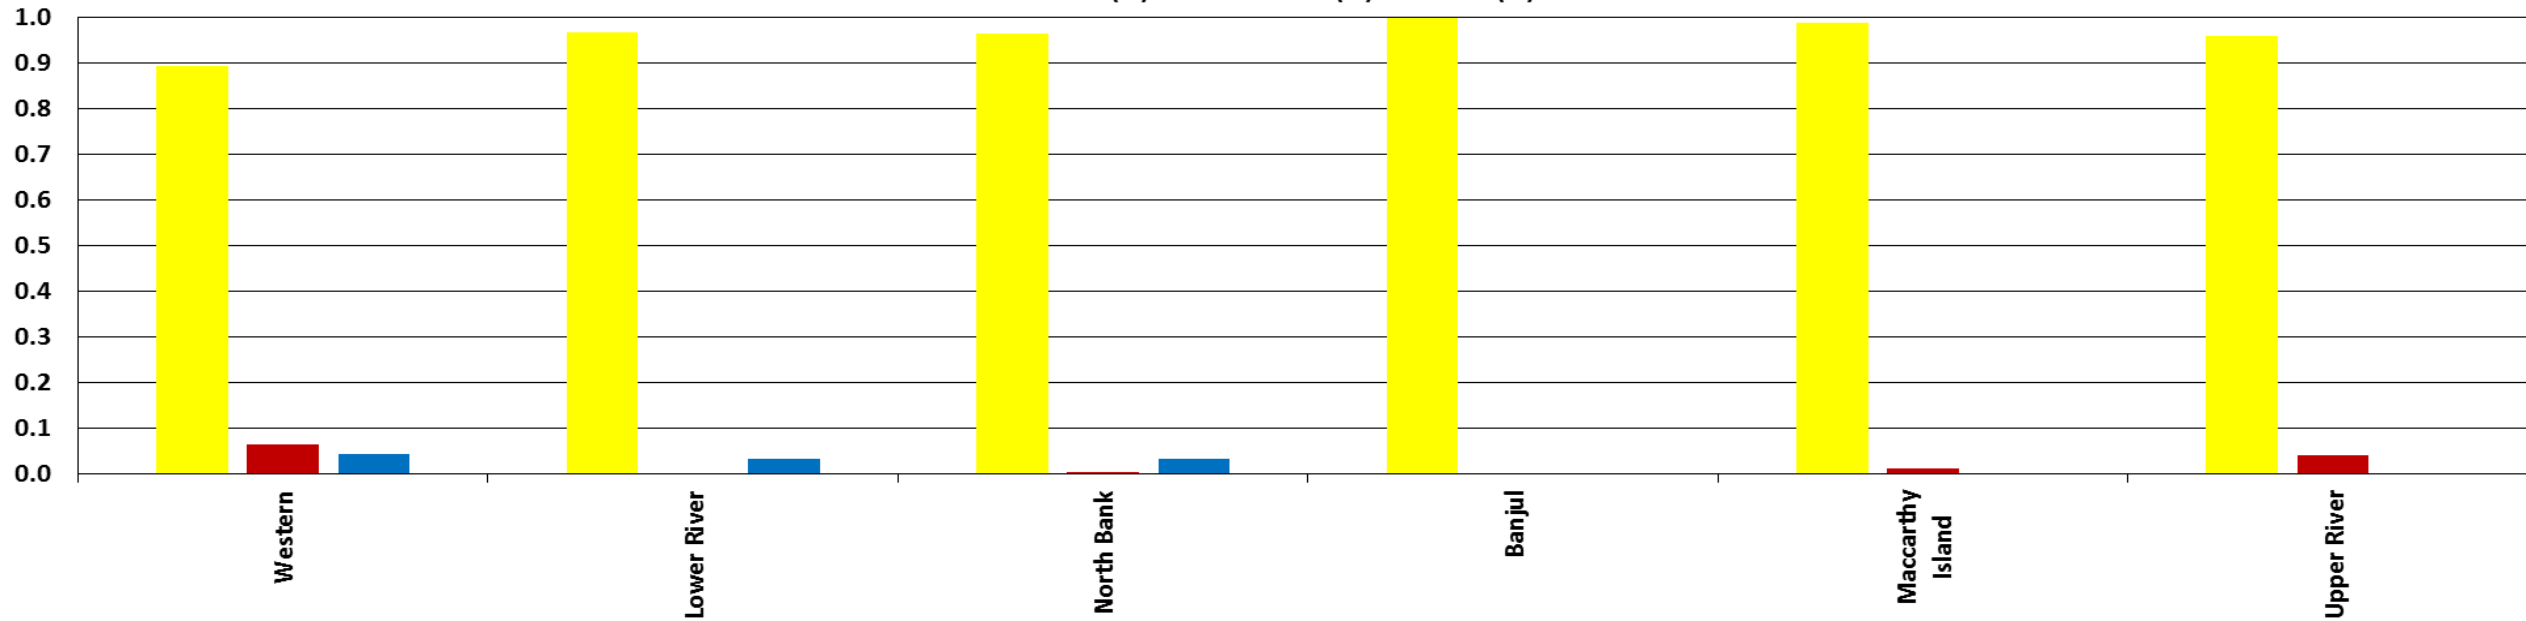

# Ghana

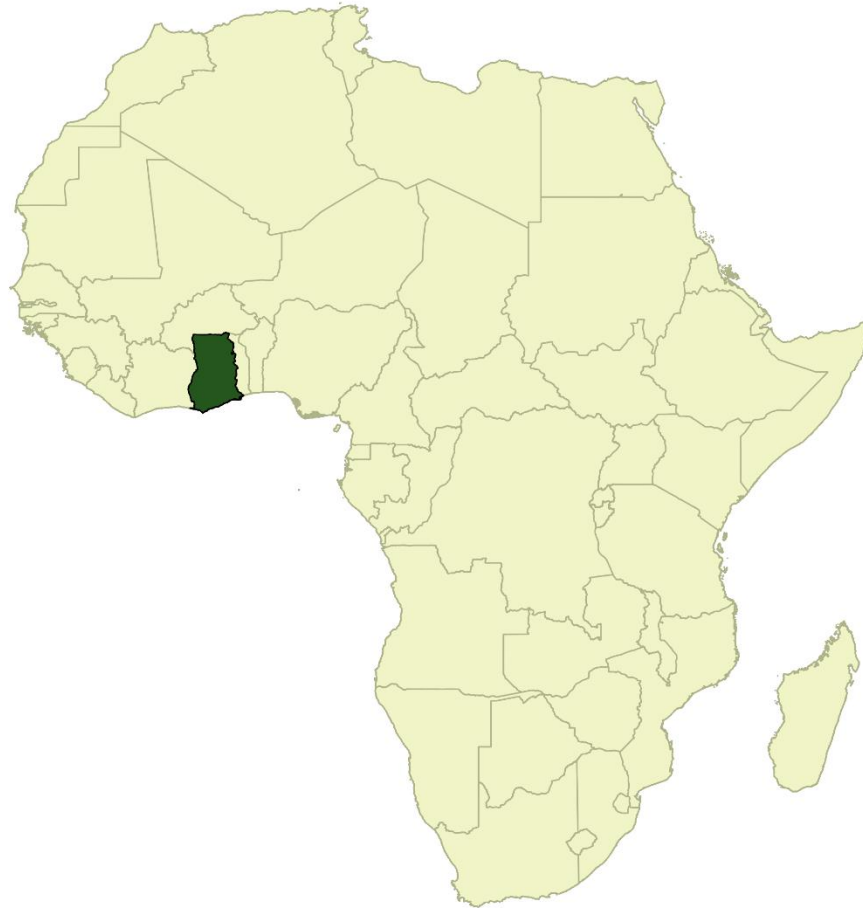

# Night light emission and Population of Ghanaian regions

## Night light emission in Ghana

Detected night lights

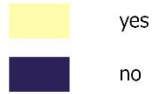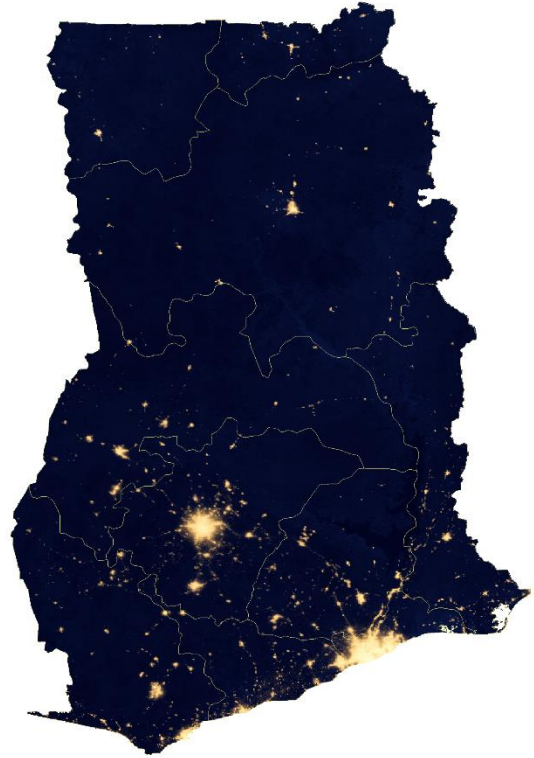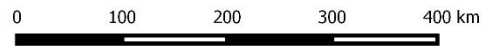

## Population structure of Ghana

Population density (people/750x750m<sup>2</sup>)

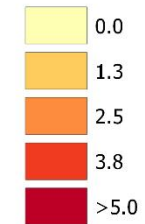

Ocean, River and Lake (blue)

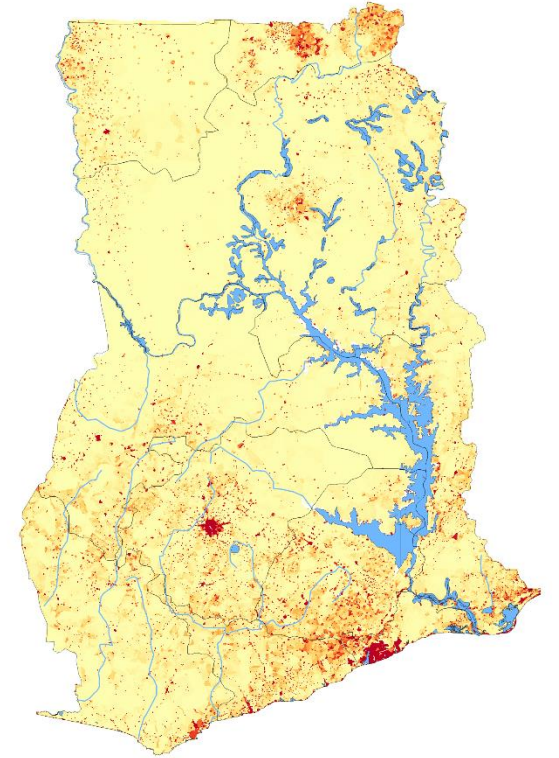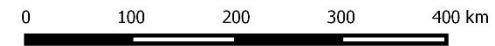

# Electrification option in all Ghanaian regions: GridBuilt-GridDom

## Electrification options of Ghanaian regions

Electrification option

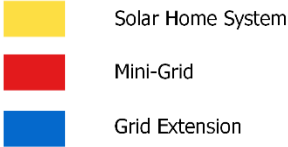

Ocean, River and Lake (Light Blue)

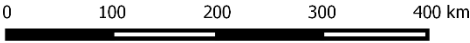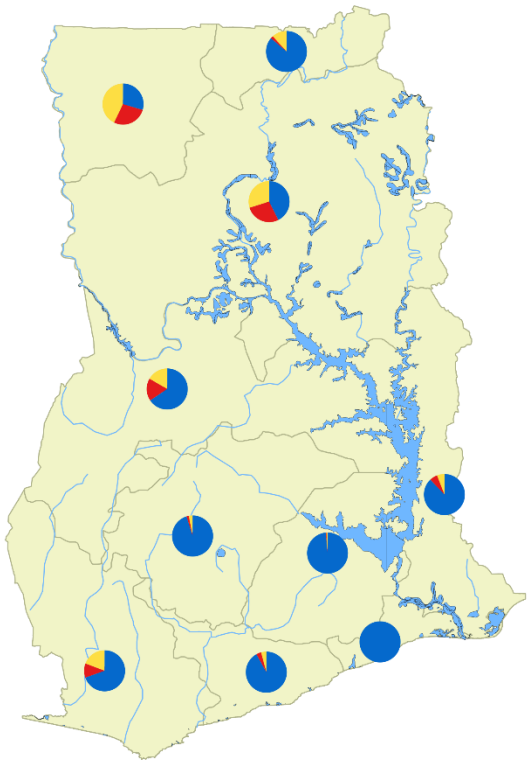

## Electrification options of Ghanaian regions

Electrification option

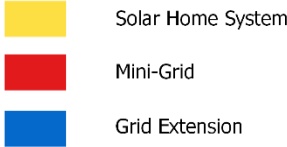

Grid Buffer (diameter)

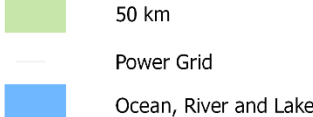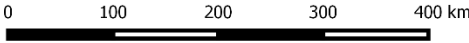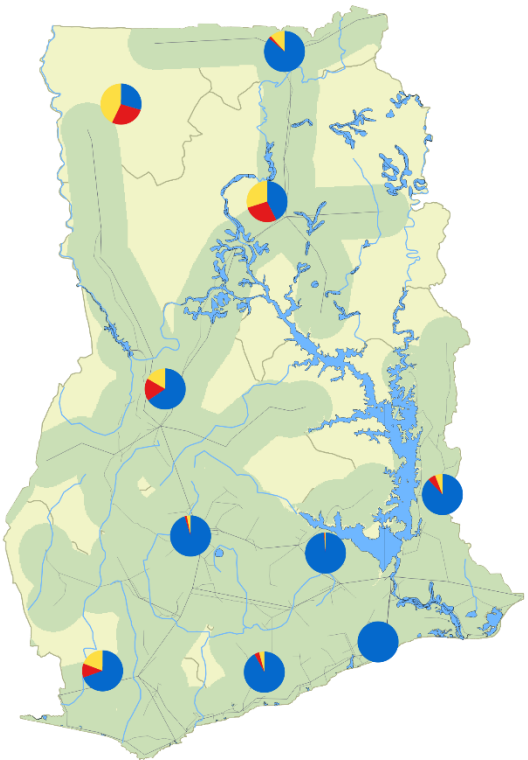

# Electrification option in all Ghanaian regions: GridBuilt-SHSDom

## Electrification options of Ghanaian regions

Electrification option

- Solar Home System
- Mini-Grid
- Grid Extension

Ocean, River and Lake

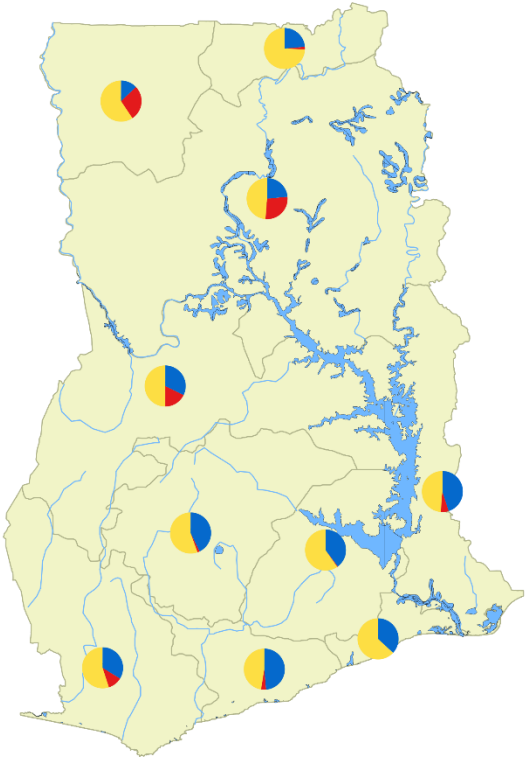

## Electrification options of Ghanaian regions

Electrification option

- Solar Home System
- Mini-Grid
- Grid Extension

Grid Buffer (diameter)

- 50 km
- Power Grid
- Ocean, River and Lake

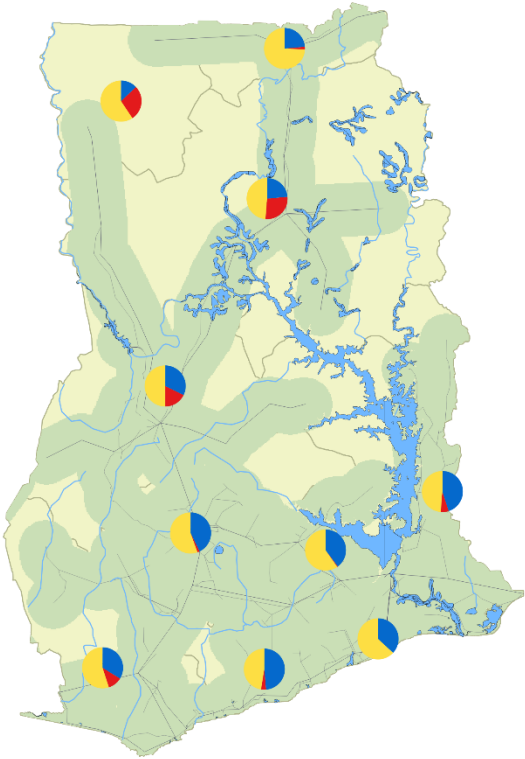

# Electrification option: GridBuilt-SHSDom

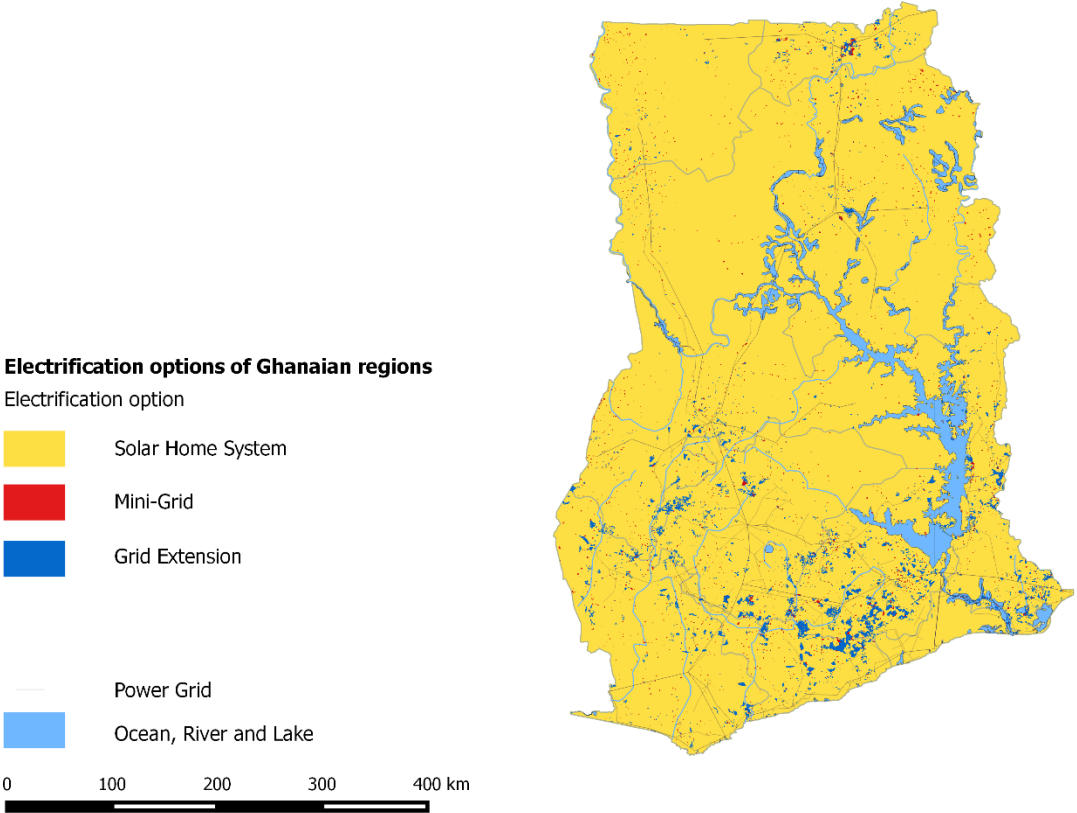

# Electrification option: GridBuilt-GridDom

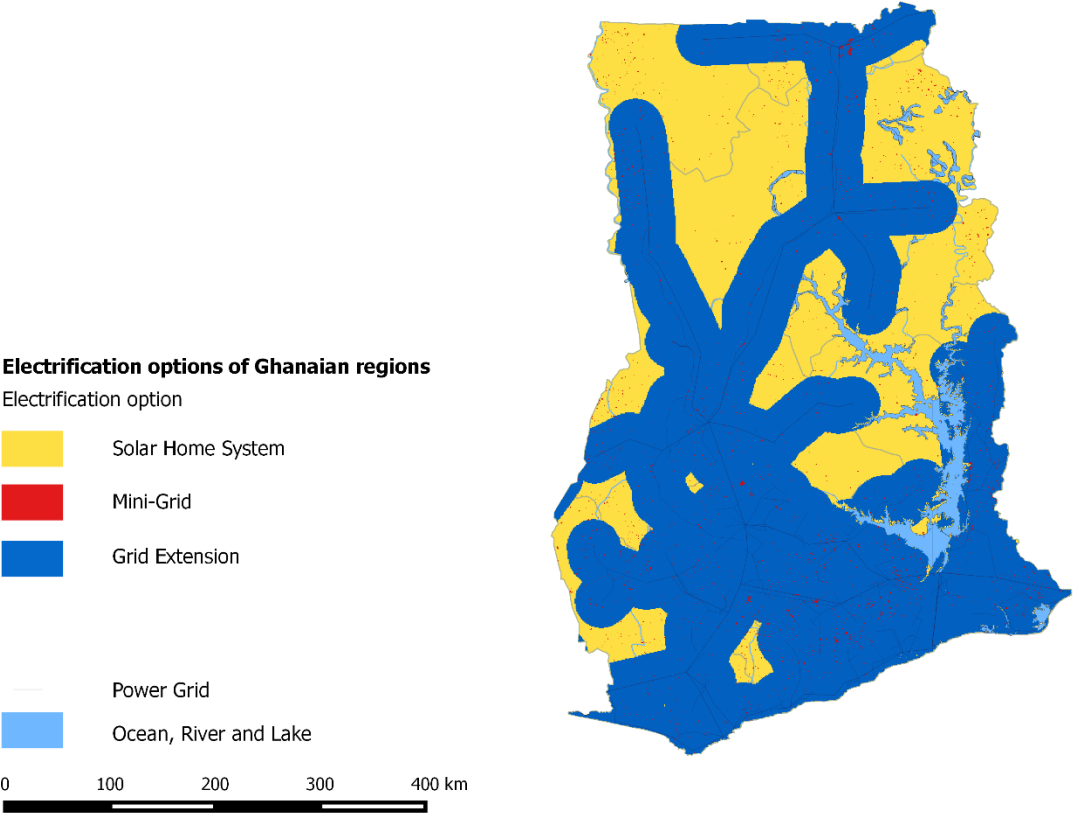

Share of electrification options in all Ghanaian regions

GridBuilt-GridDom

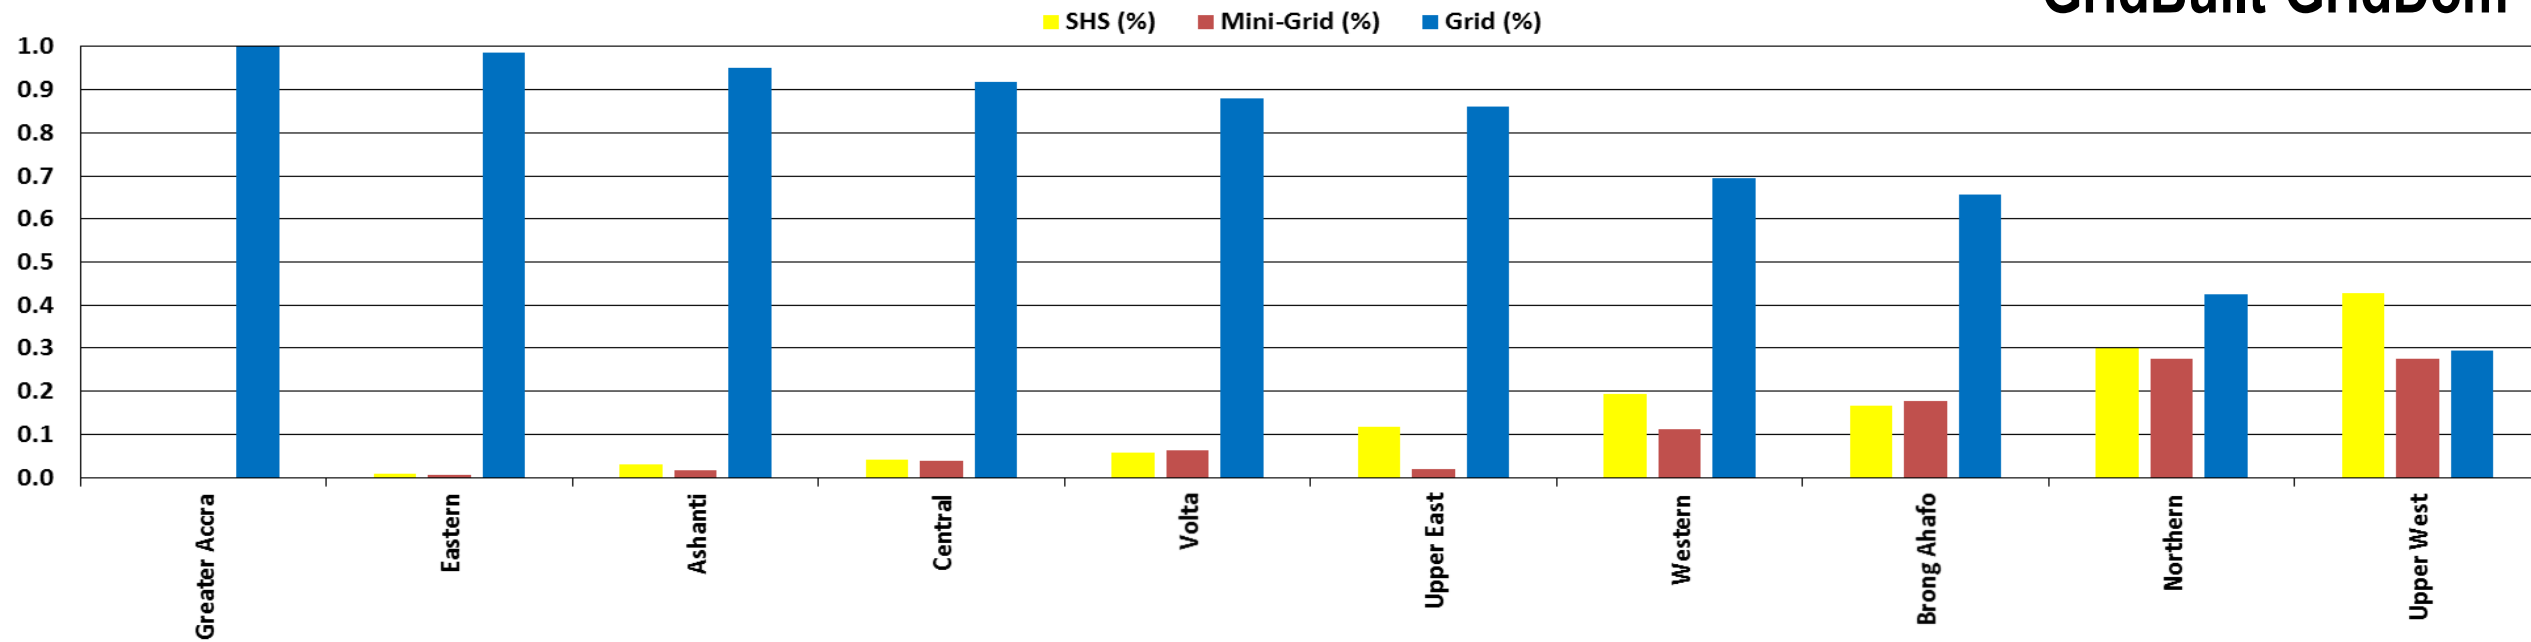

Share of electrification options in all Ghanaian regions

GridBuilt-SHSDom

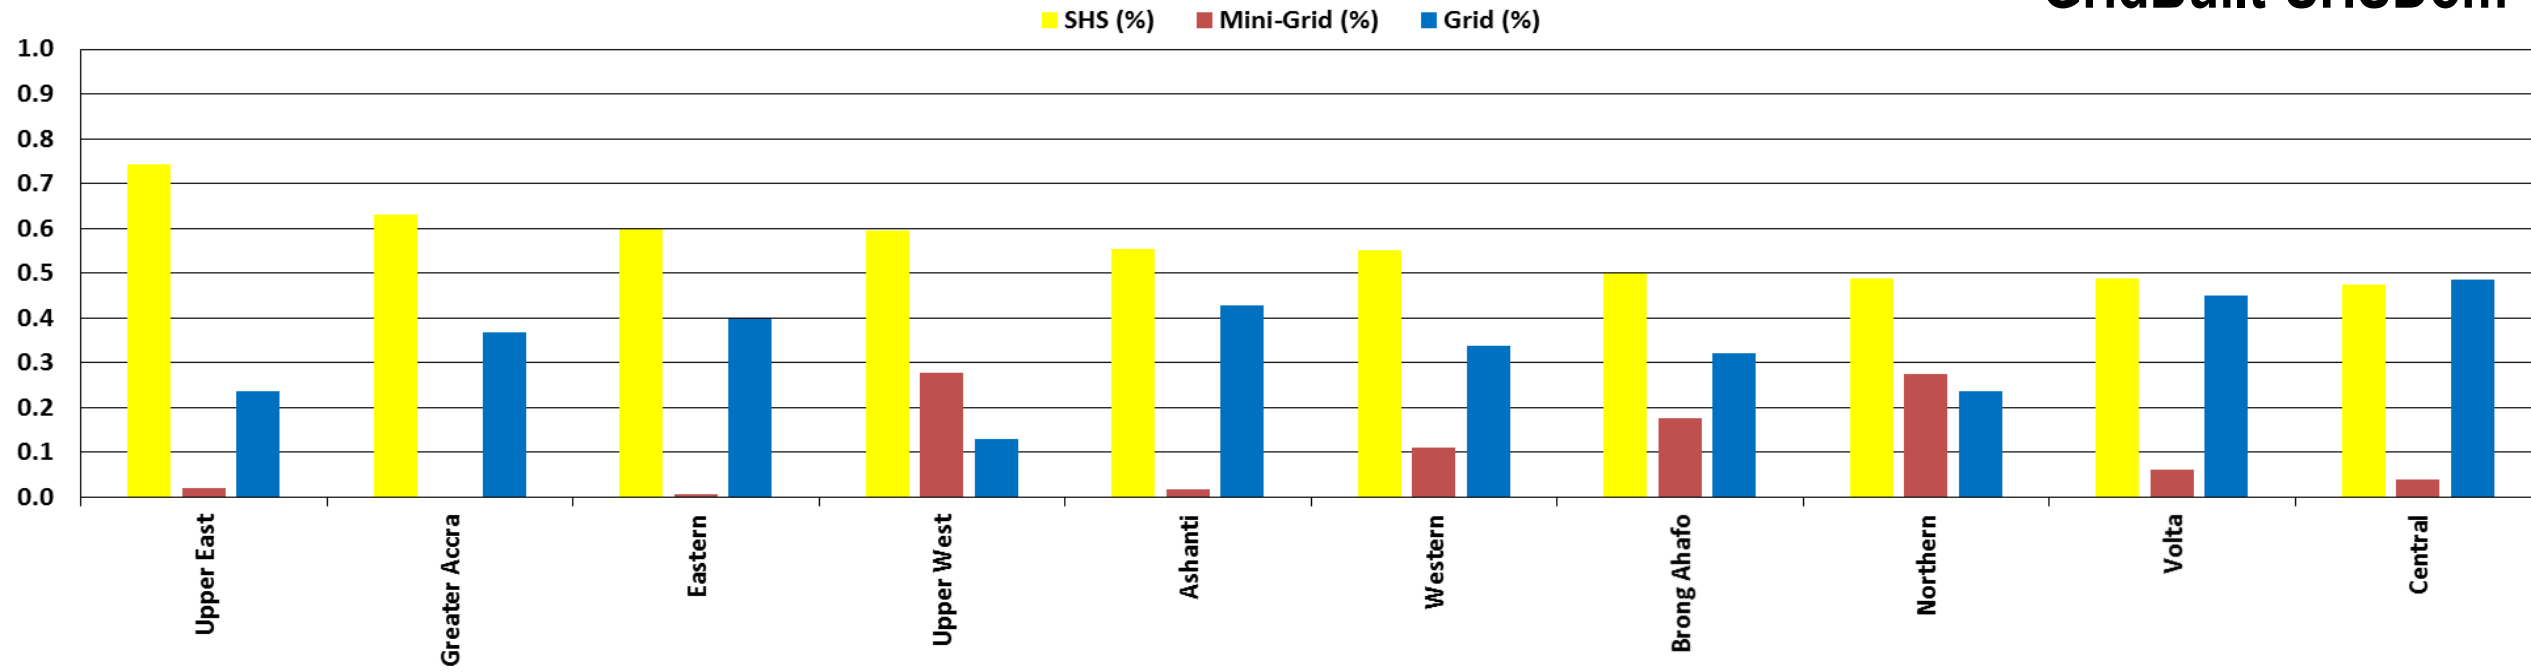

# Electrification option in all Ghanaian regions: GridPlanned-GridDom

## Electrification options of Ghanaian regions

Electrification option

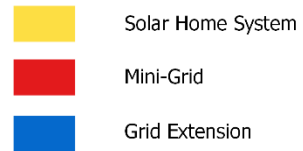

Ocean, River and Lake (Light Blue)

0 100 200 300 400 km

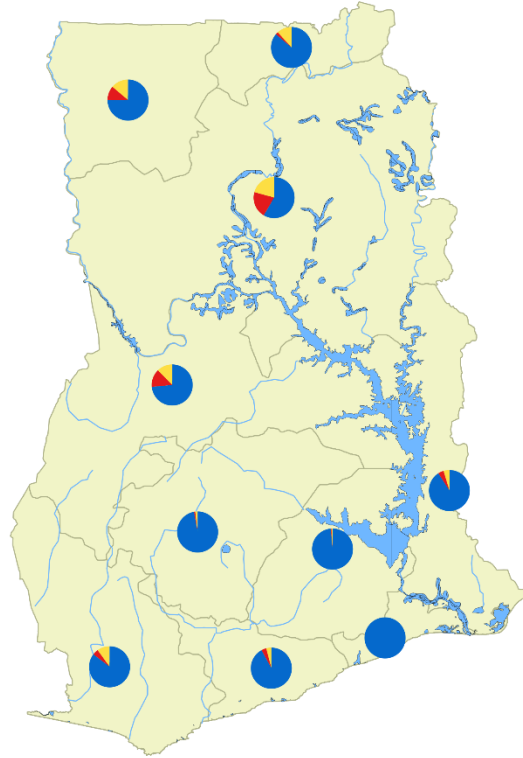

## Electrification options of Ghanaian regions

Electrification option

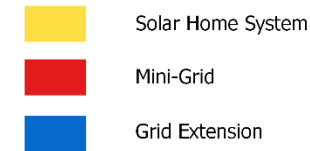

Grid Buffer (diameter)

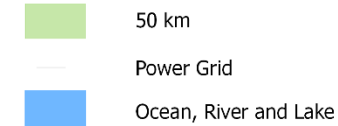

0 100 200 300 400 km

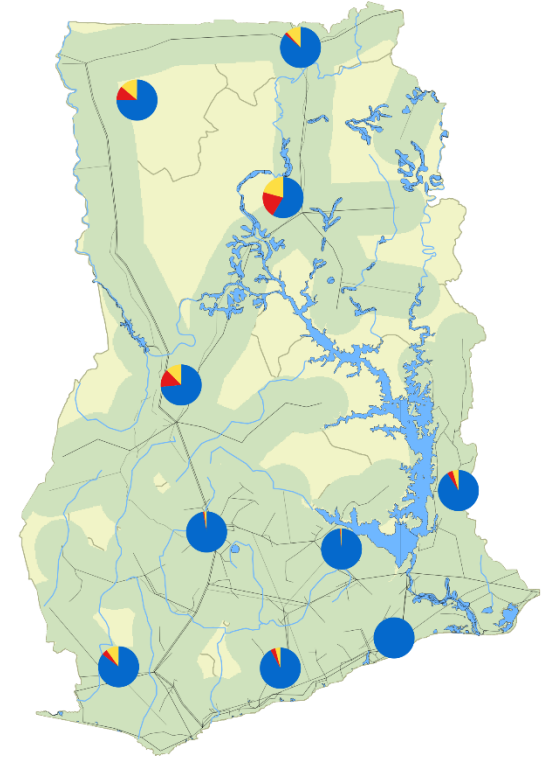

# Electrification option in all Ghanaian regions: GridPlanned-SHSDom

## Electrification options of Ghanaian regions

Electrification option



Ocean, River and Lake (Blue)

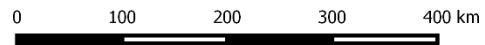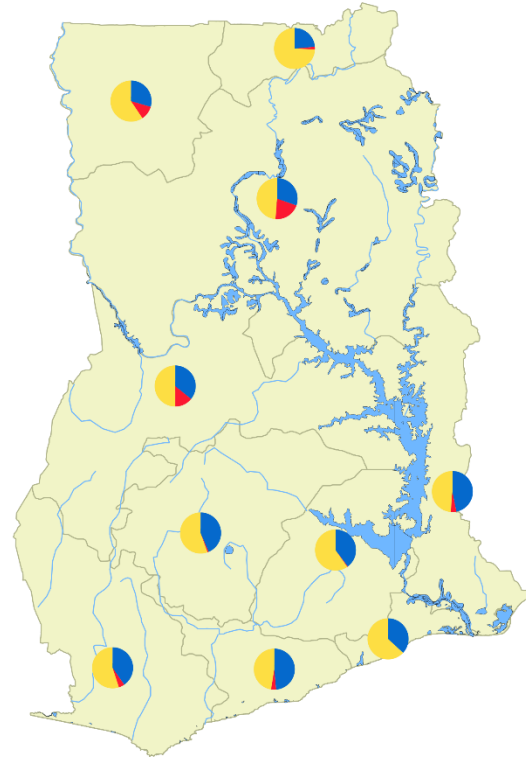

## Electrification options of Ghanaian regions

Electrification option

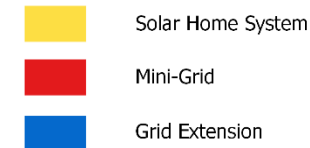

Grid Buffer (diameter)

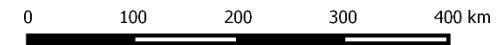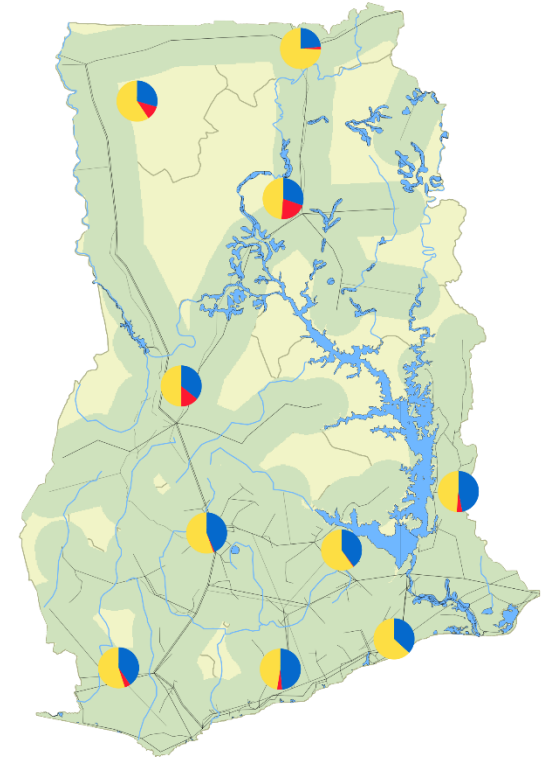

# Electrification option: GridPlanned-SHSDom

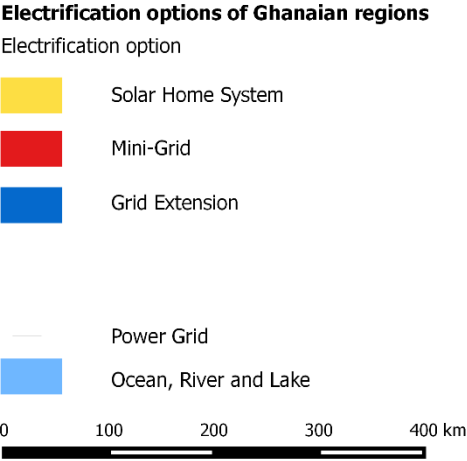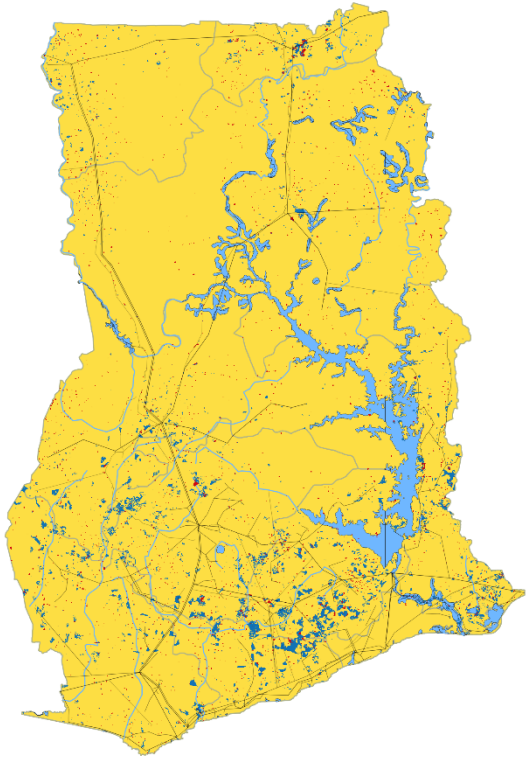

# Electrification option: GridPlanned-GridDom

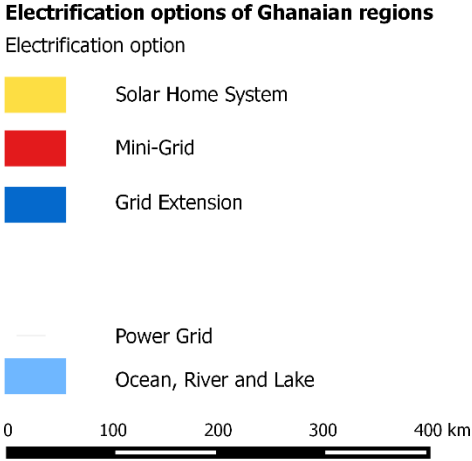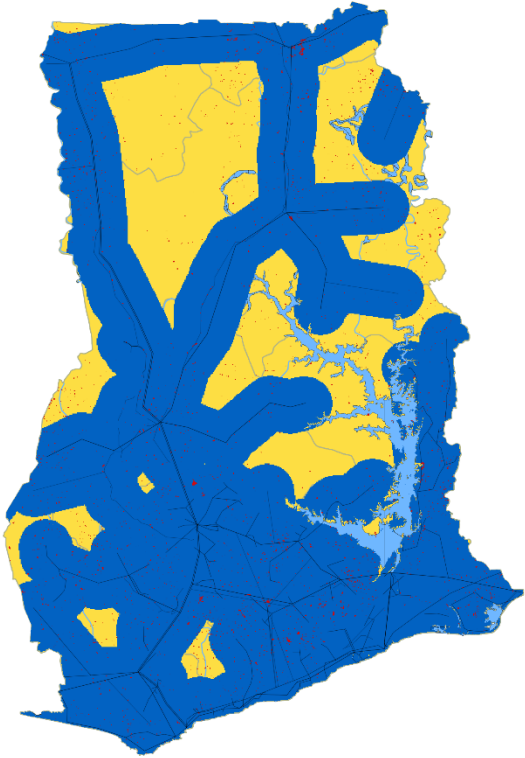

Share of electrification options in all Ghanaian regions

SHS (%) Mini-Grid (%) Grid (%)

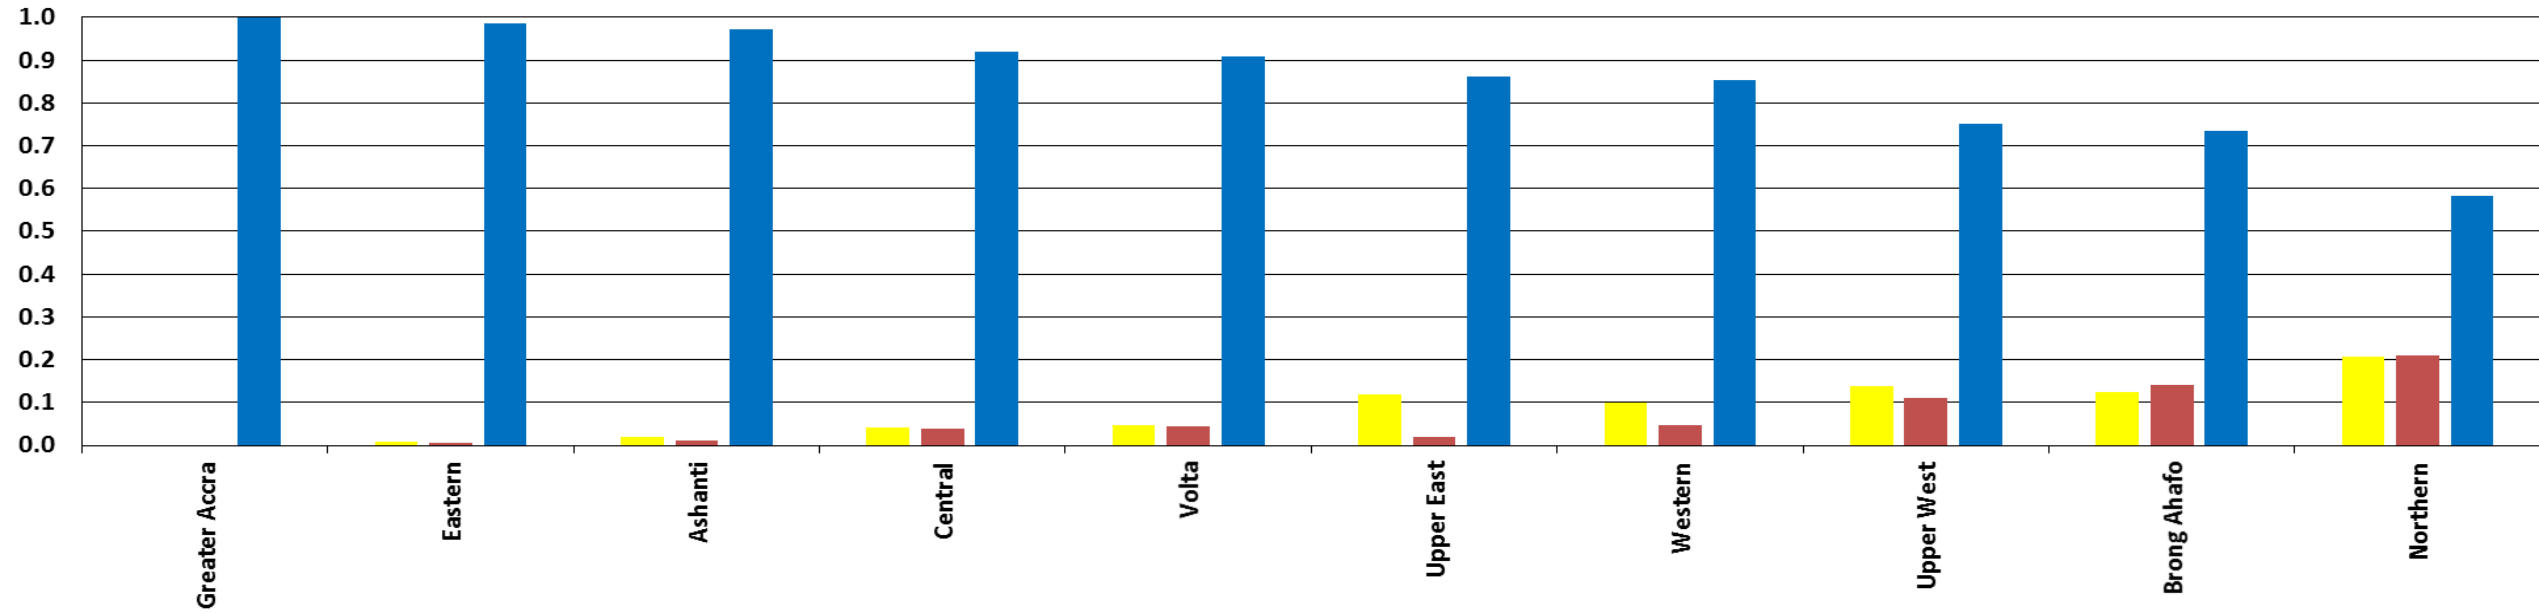

Share of electrification options in all Ghanaian regions

SHS (%) Mini-Grid (%) Grid (%)

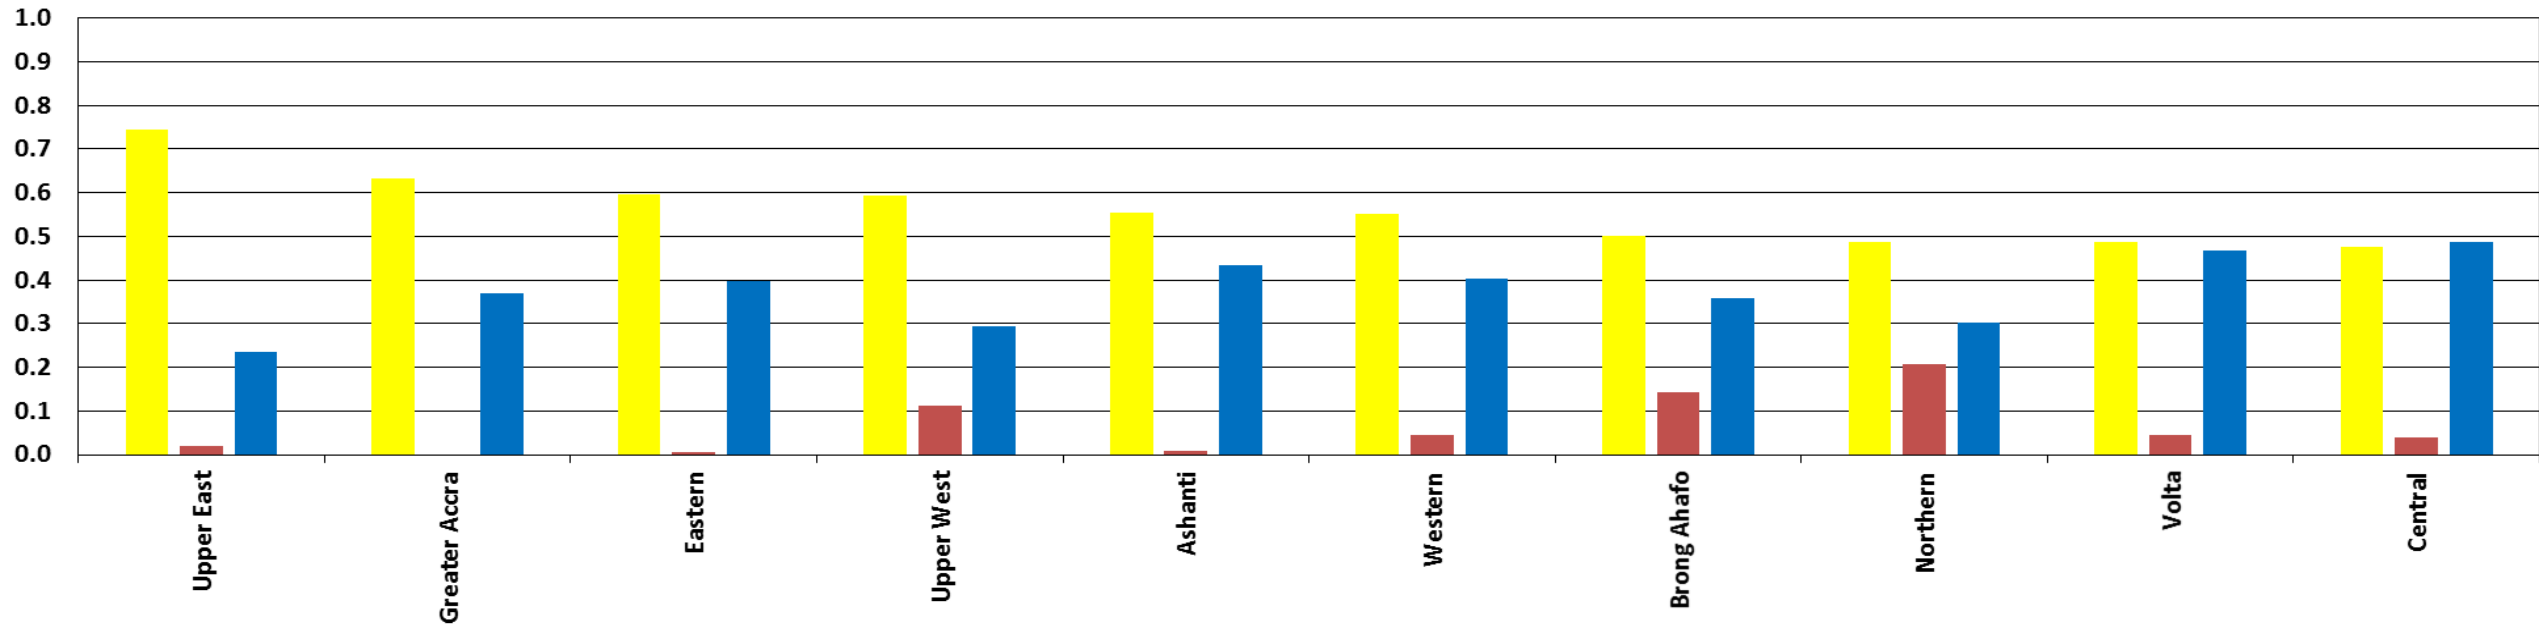

# Guinea

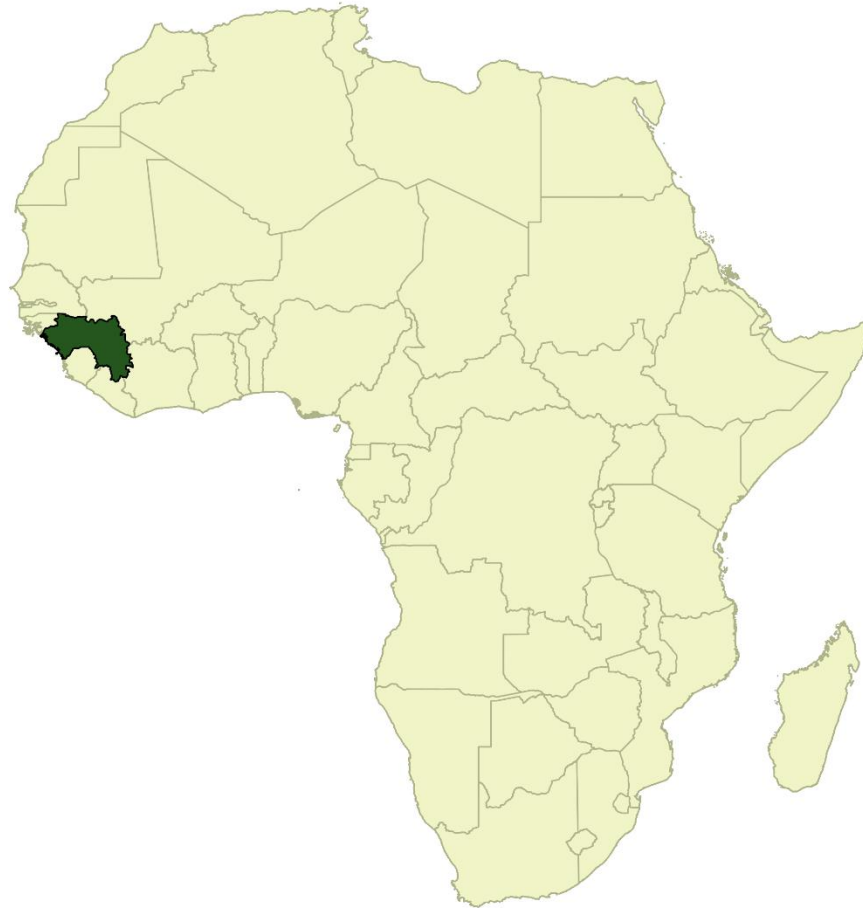

# Night light emission and Population of Guinean regions

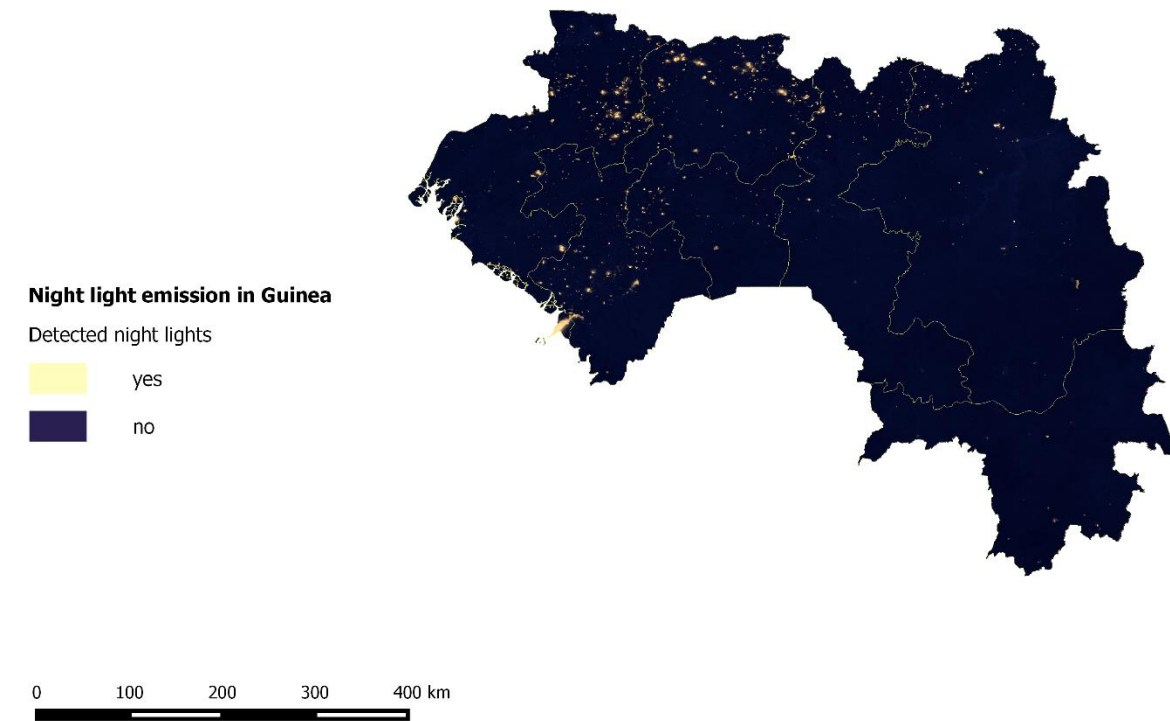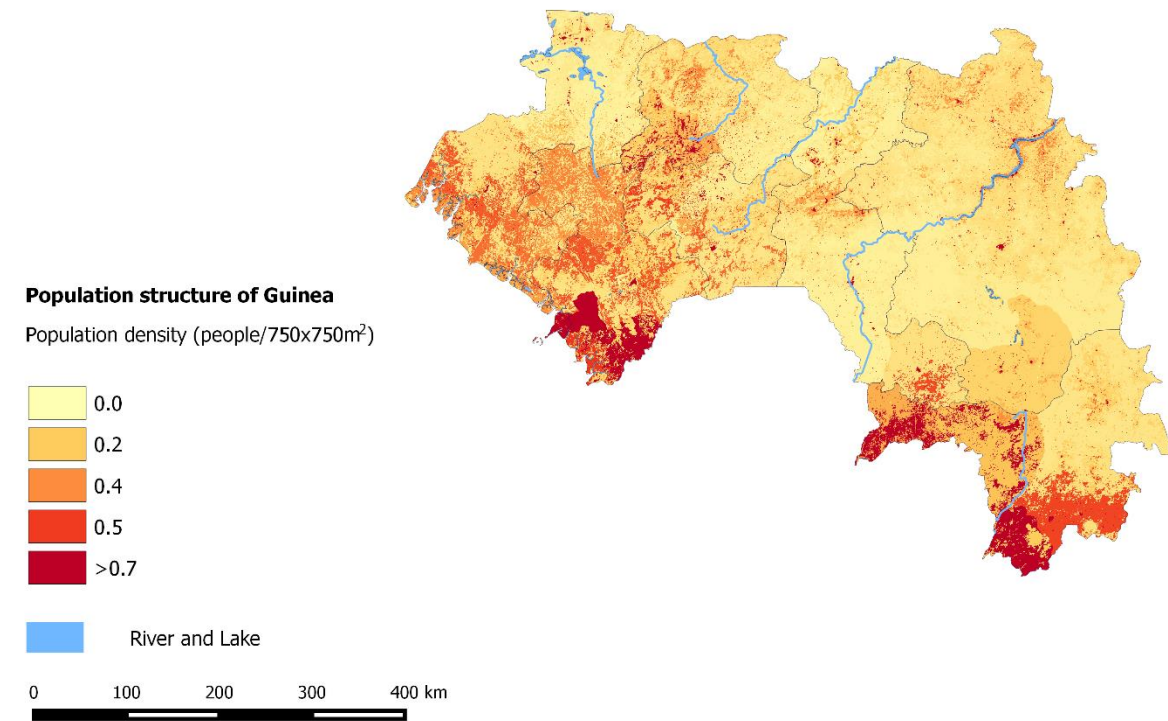

# Electrification option in all Guinean regions: GridBuilt-GridDom

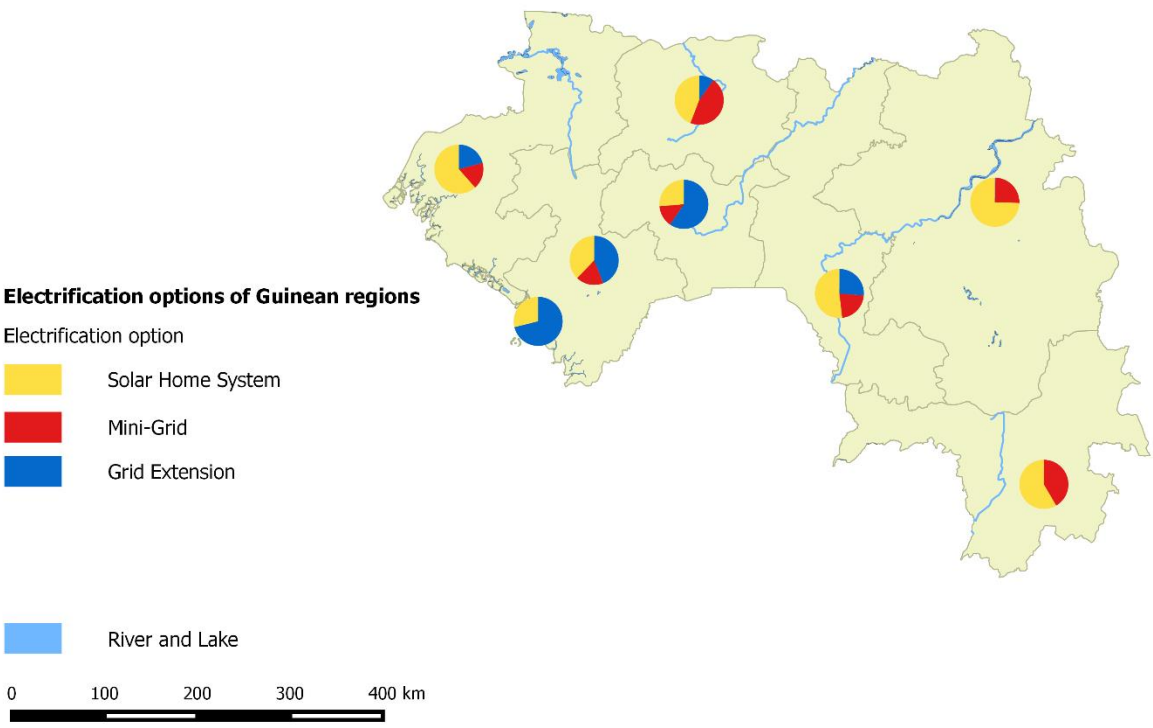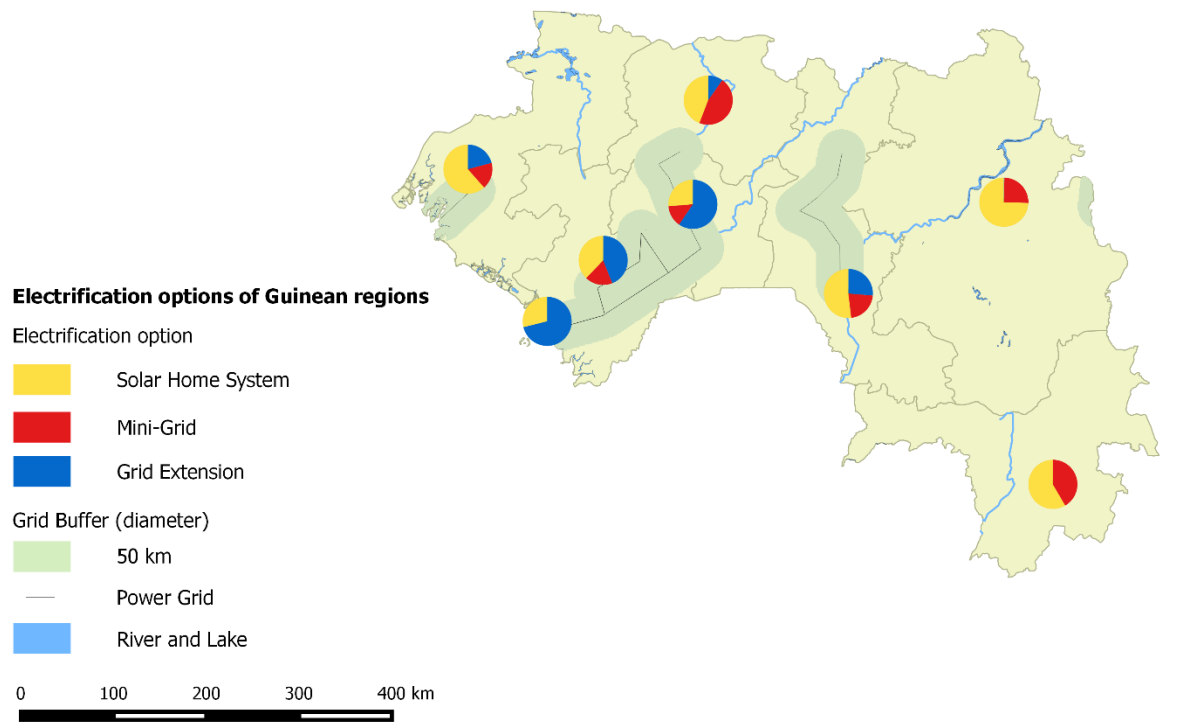

# Electrification option in all Guinean regions: GridBuilt-SHSDom

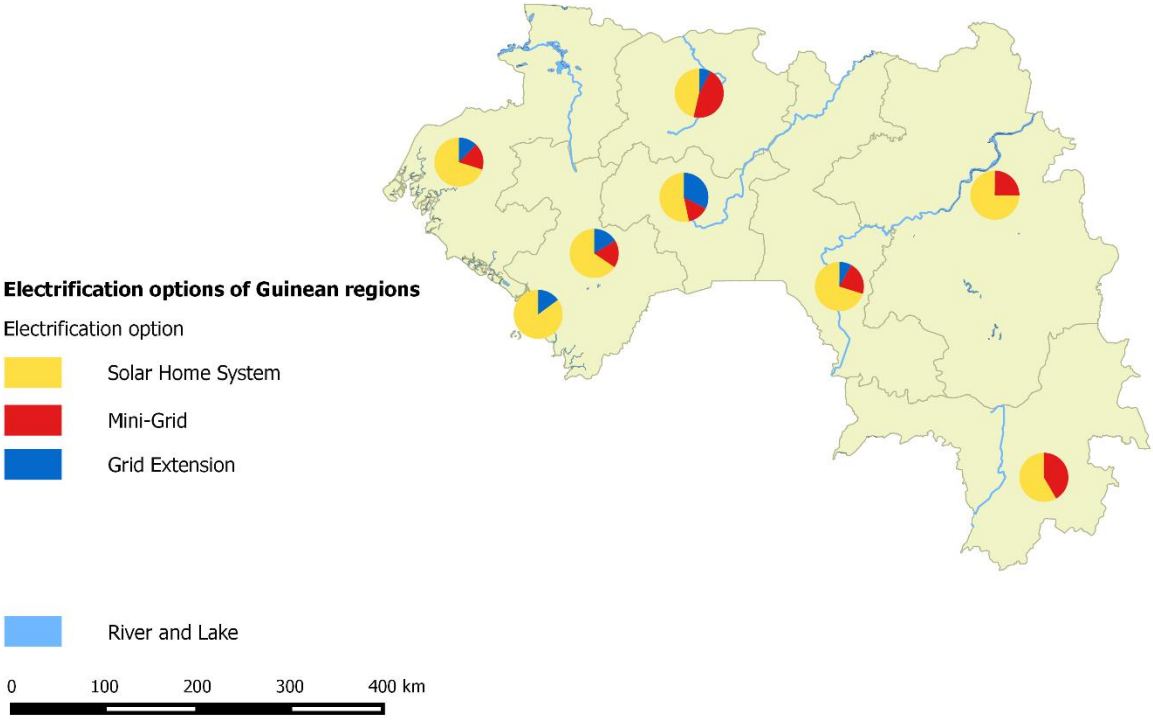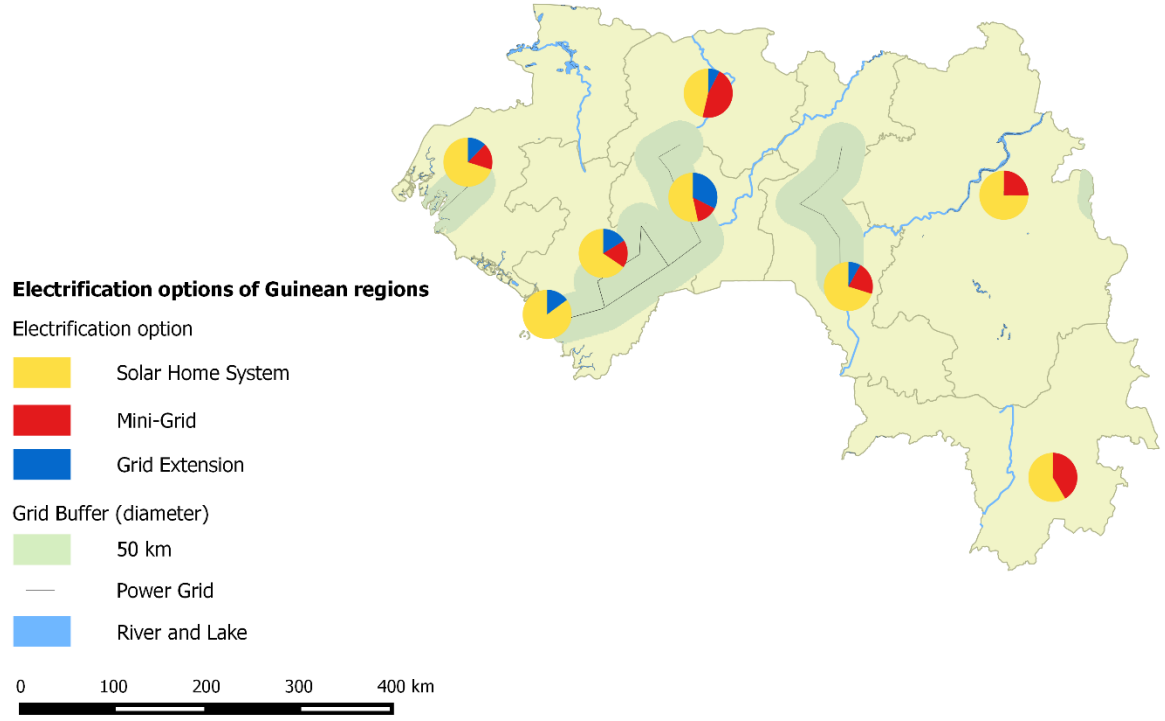

# Electrification option: GridBuilt-SHSDom

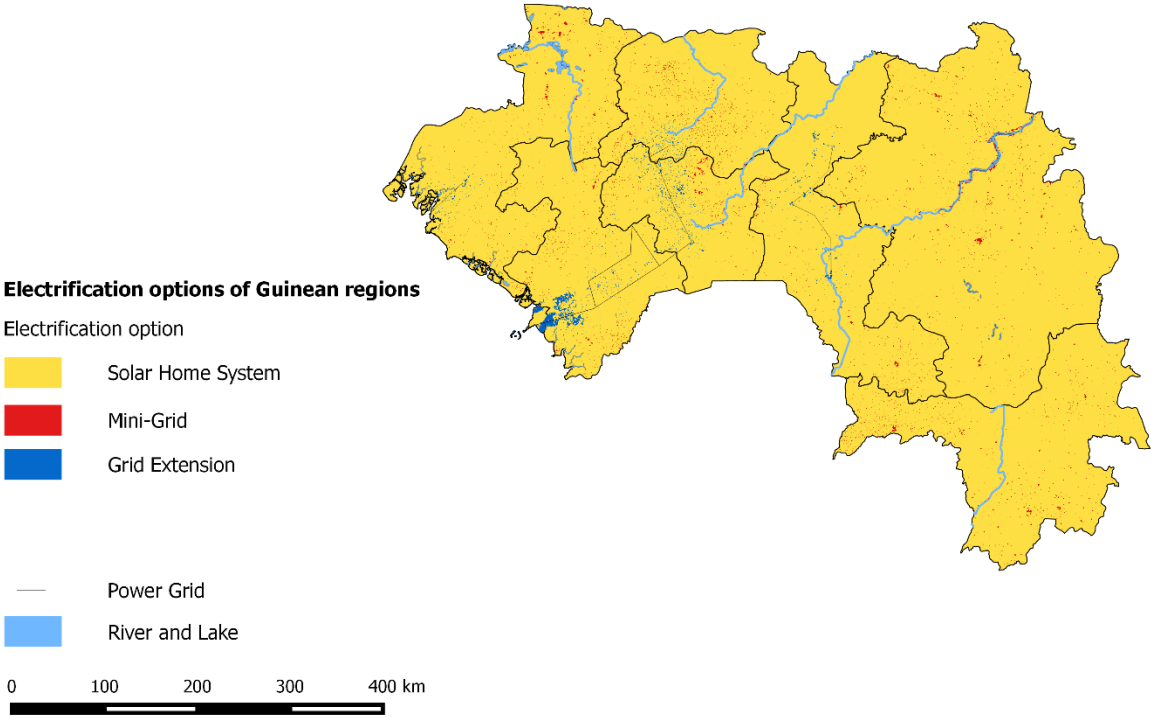

# Electrification option: GridBuilt-GridDom

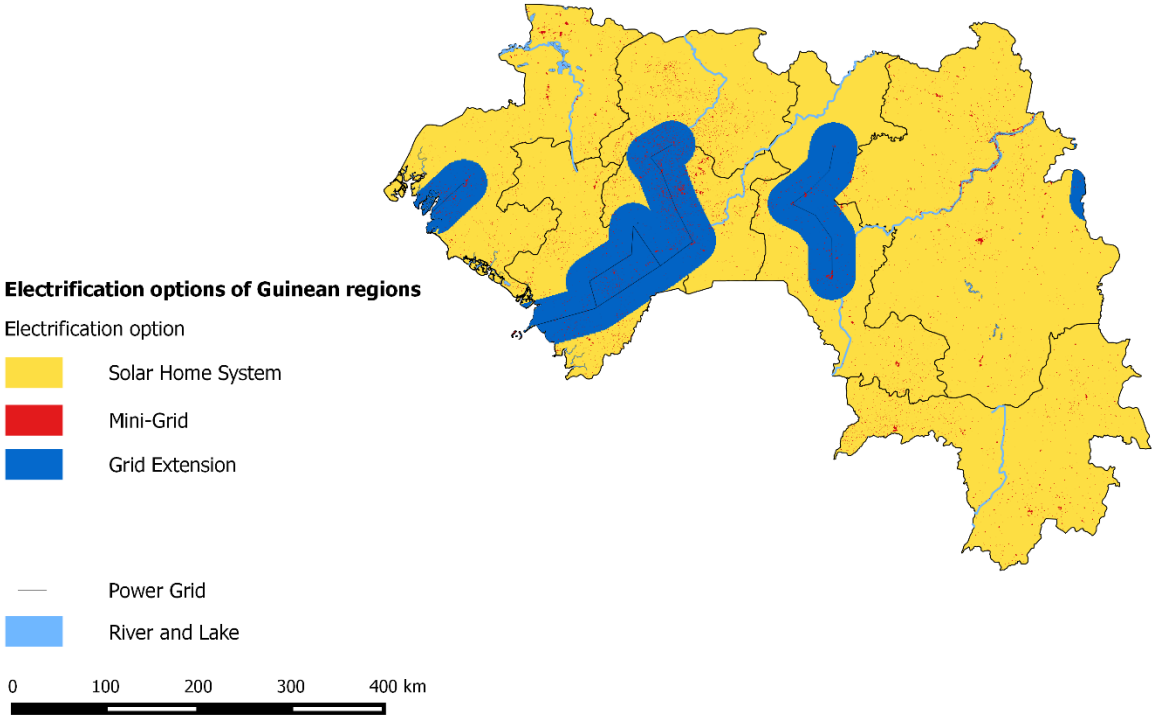

Share of electrification options in all Guinean regions

SHS (%) Mini-Grid (%) Grid (%)

GridBuilt-GridDom

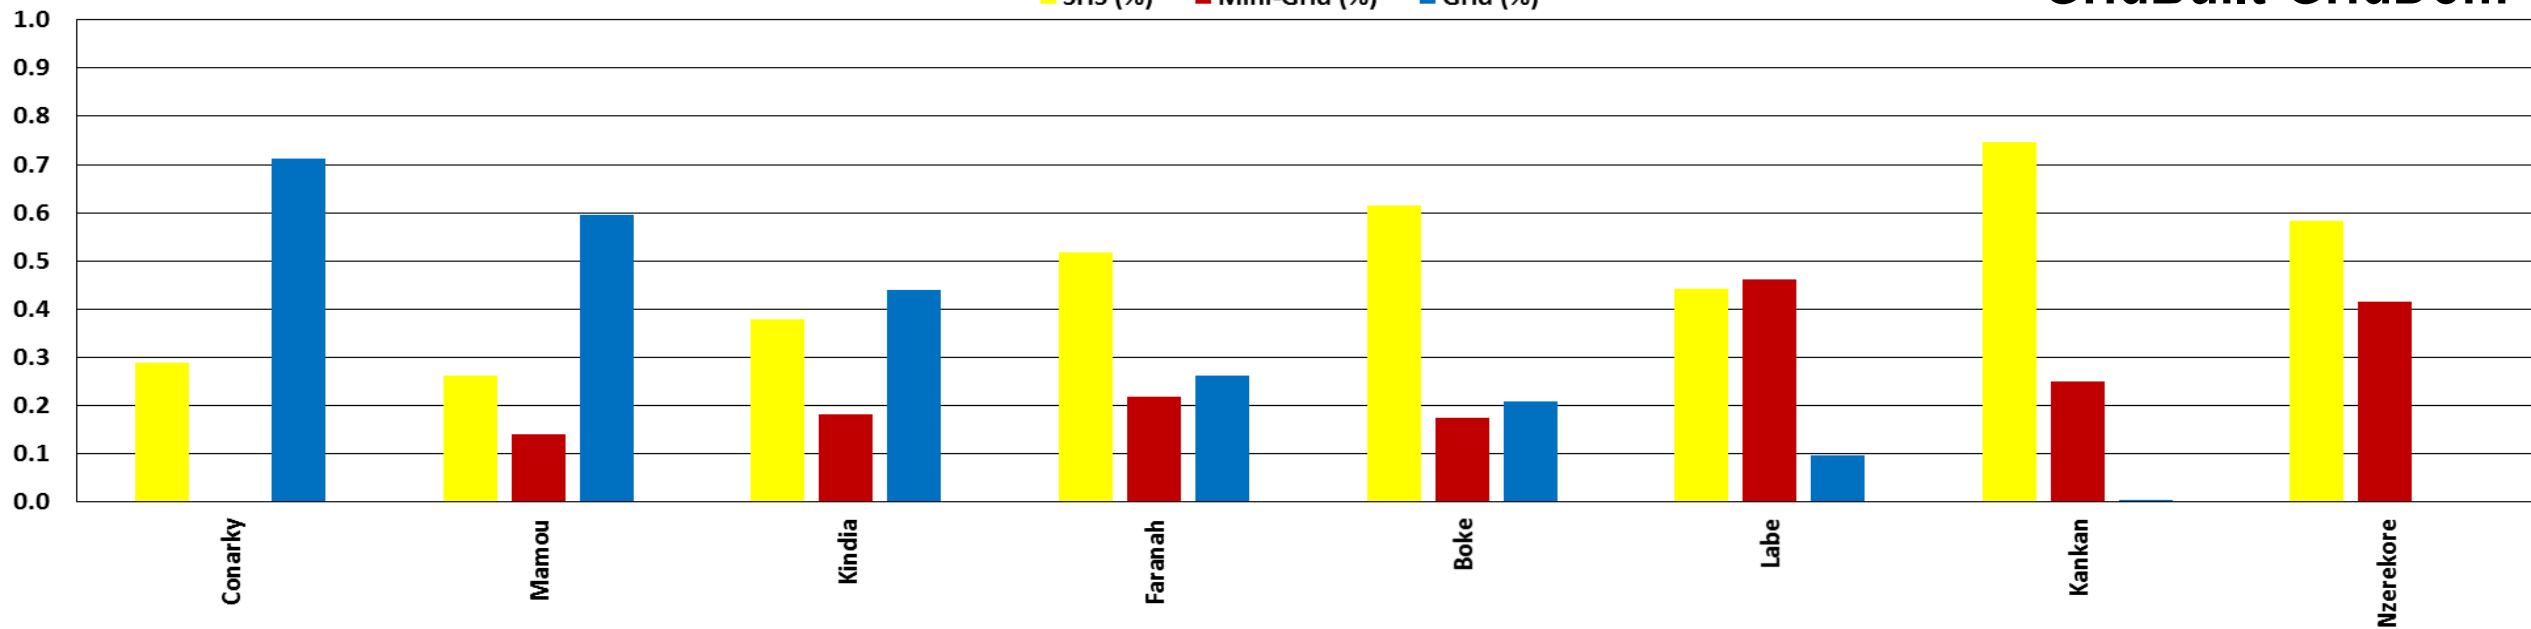

Share of electrification options in all Guinean regions

SHS (%) Mini-Grid (%) Grid (%)

GridBuilt-SHSDom

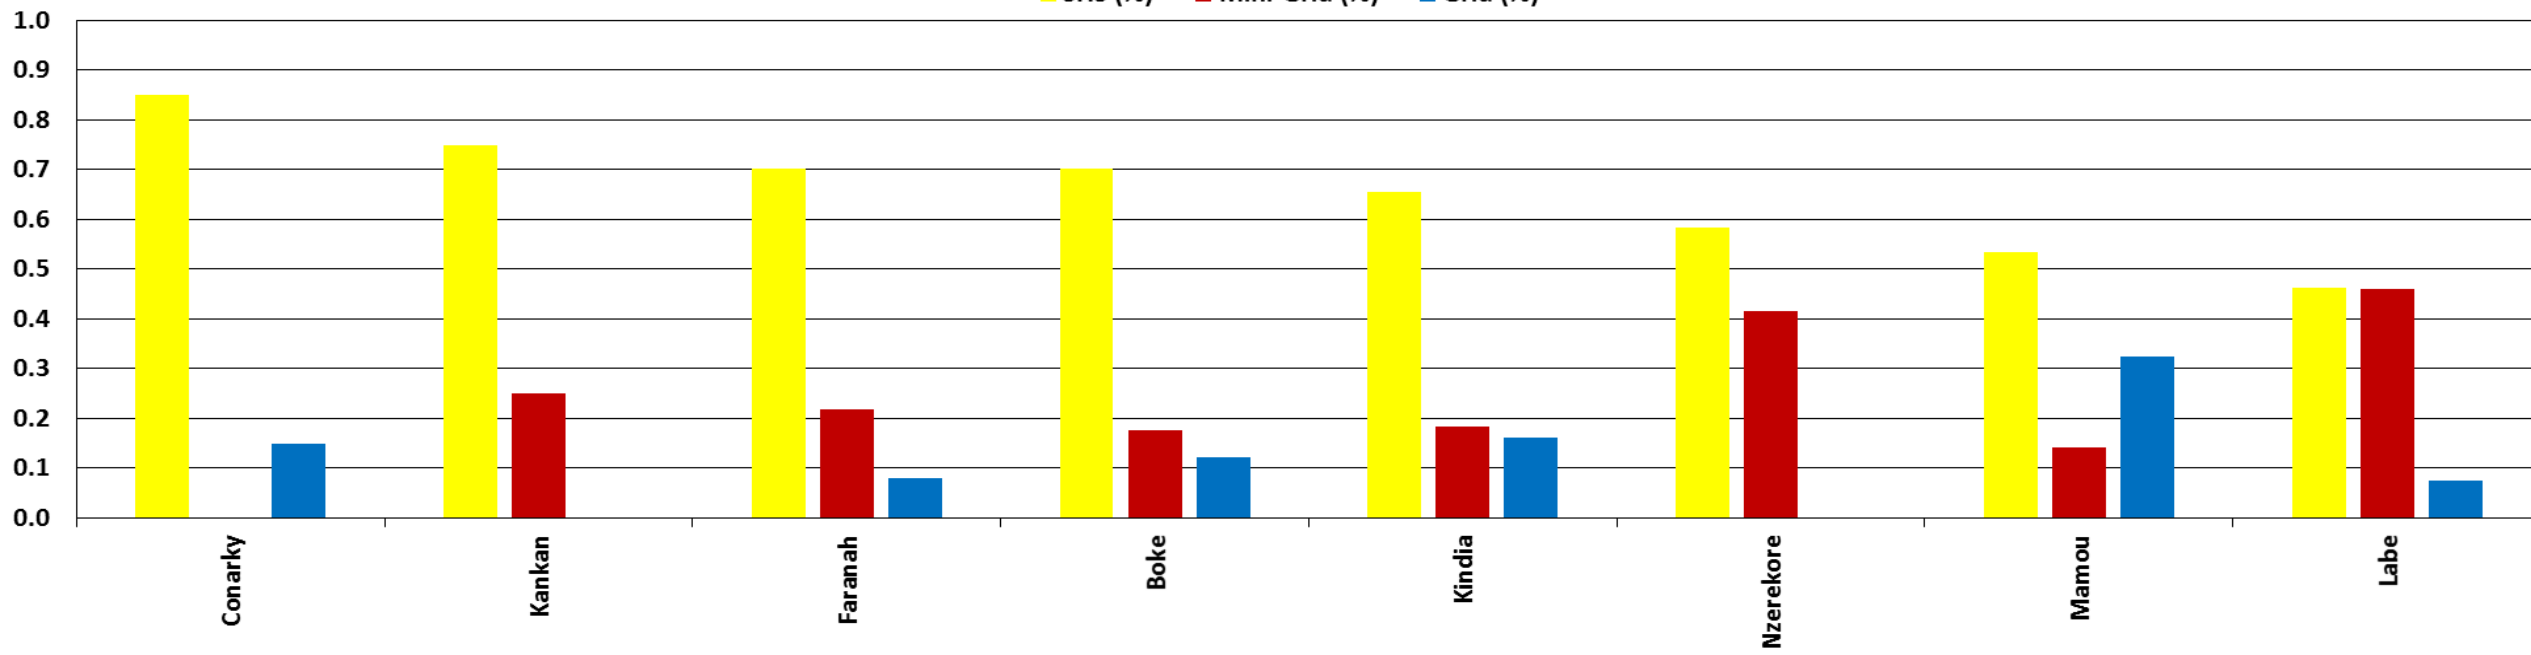

# Electrification option in all Guinean regions: GridPlanned-GridDom

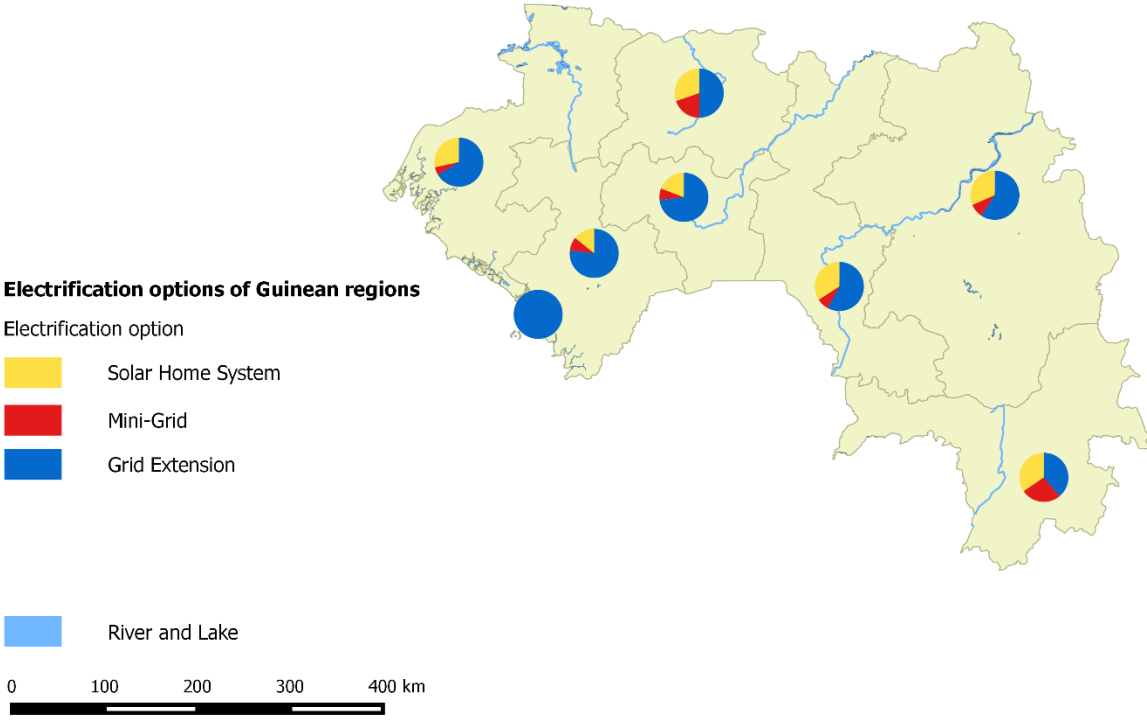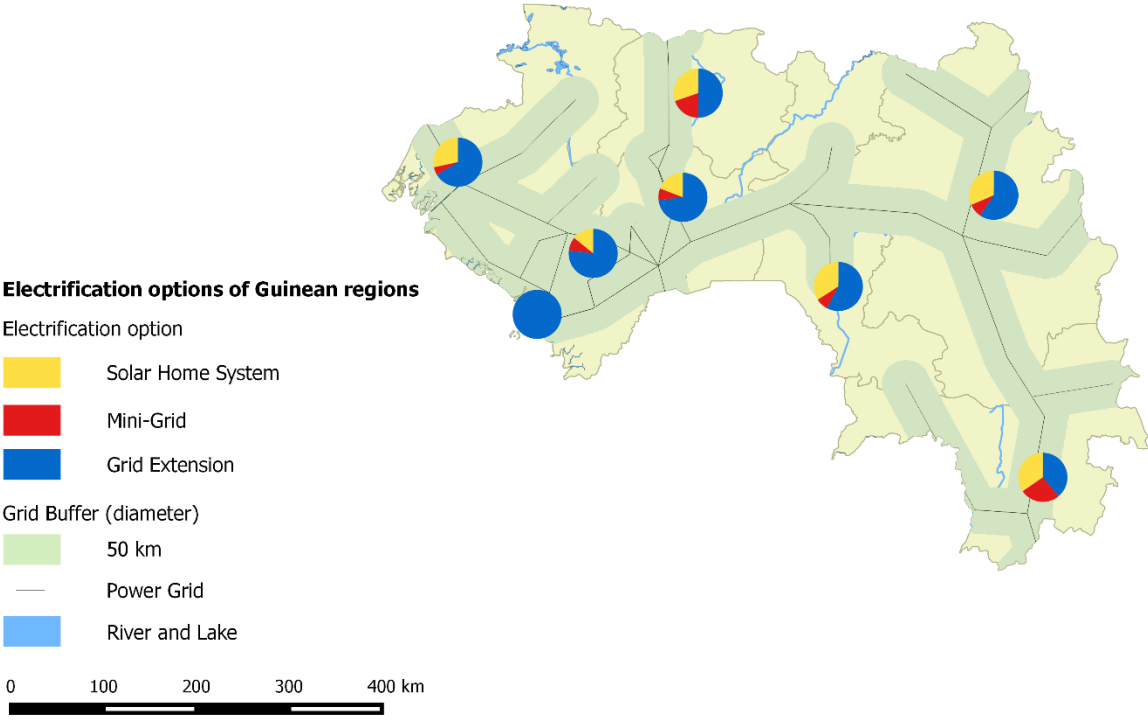

# Electrification option in all Guinean regions: GridPlanned-SHSDom

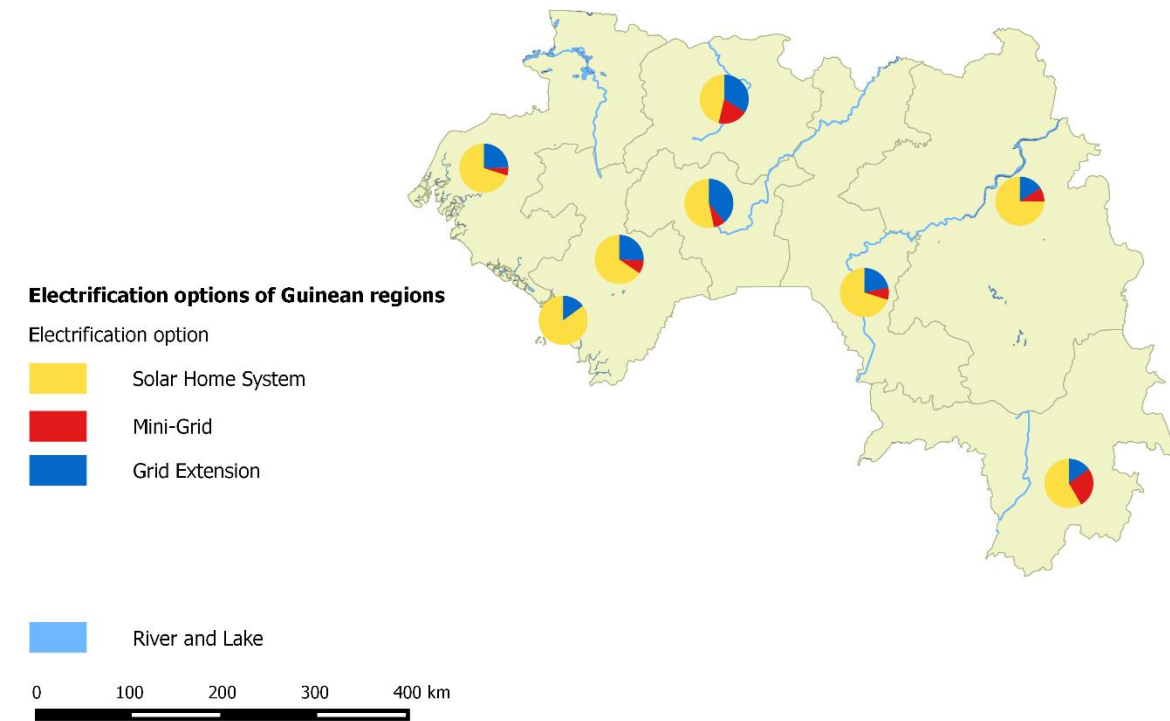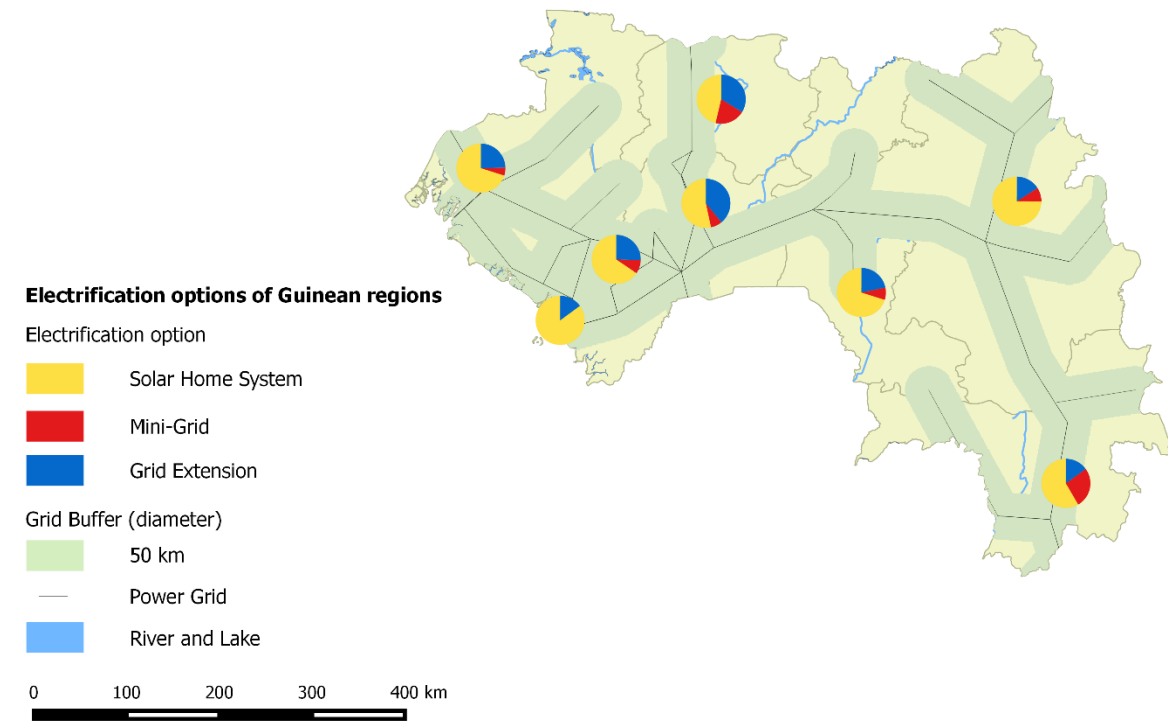

# Electrification option: GridPlanned-SHSDom

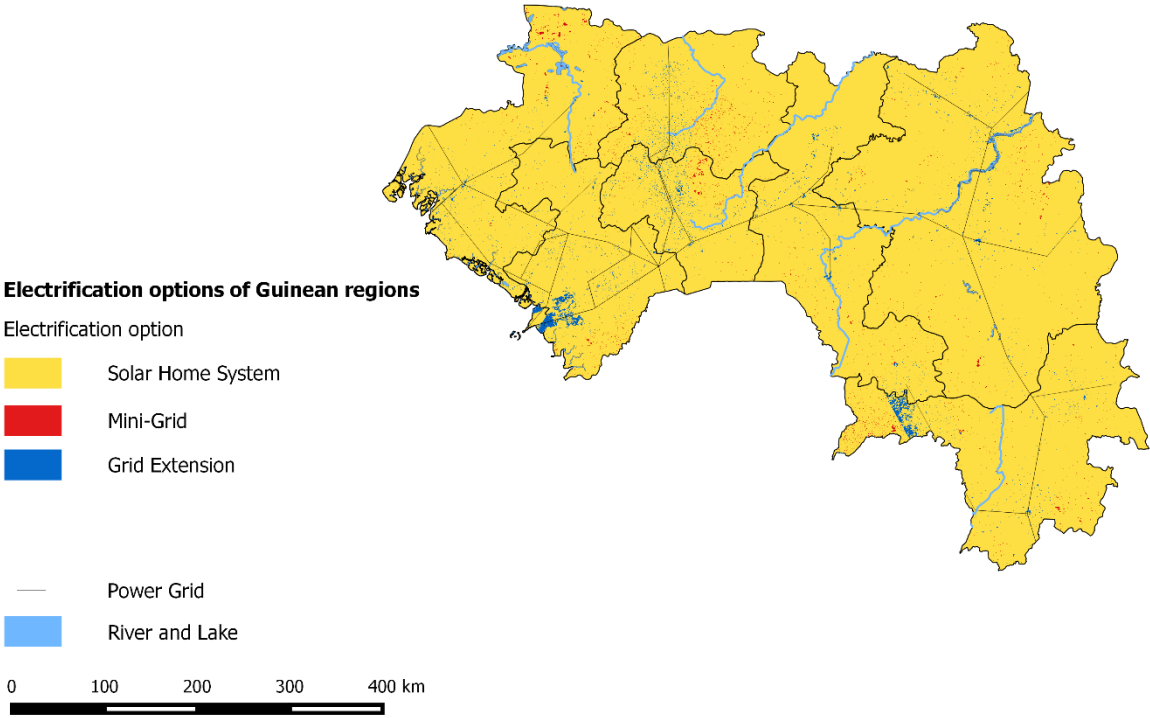

# Electrification option: GridPlanned-GridDom

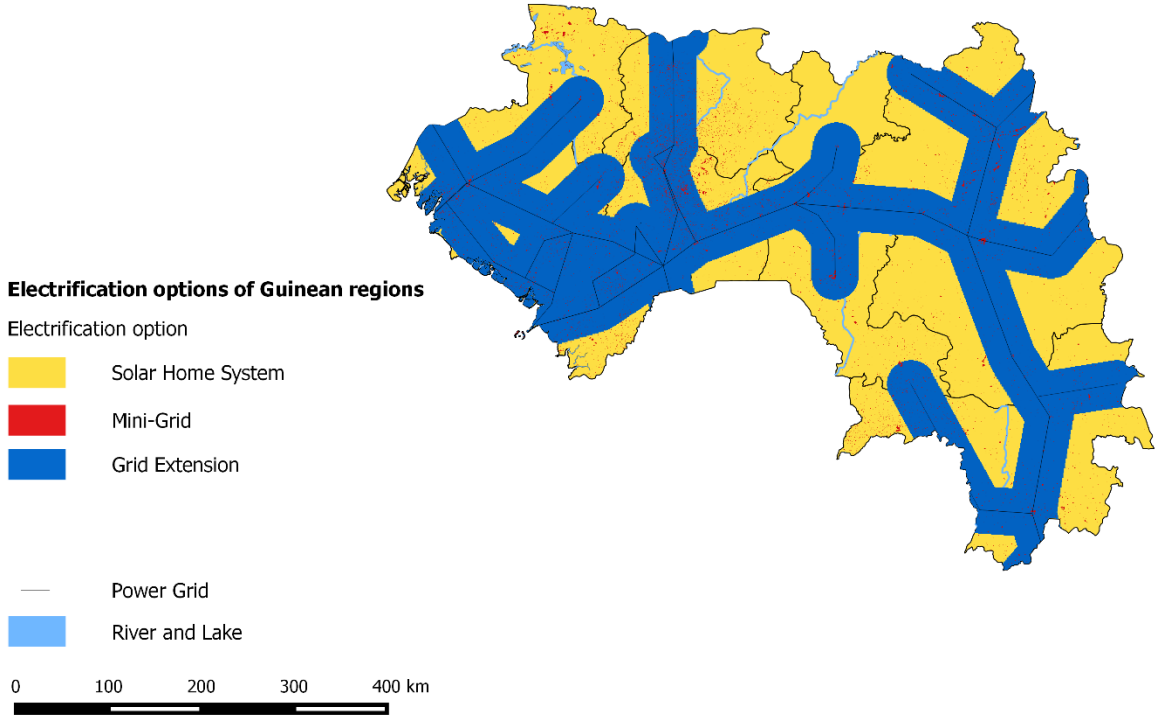

Share of electrification options in all Guinean regions

GridPlanned-GridDom

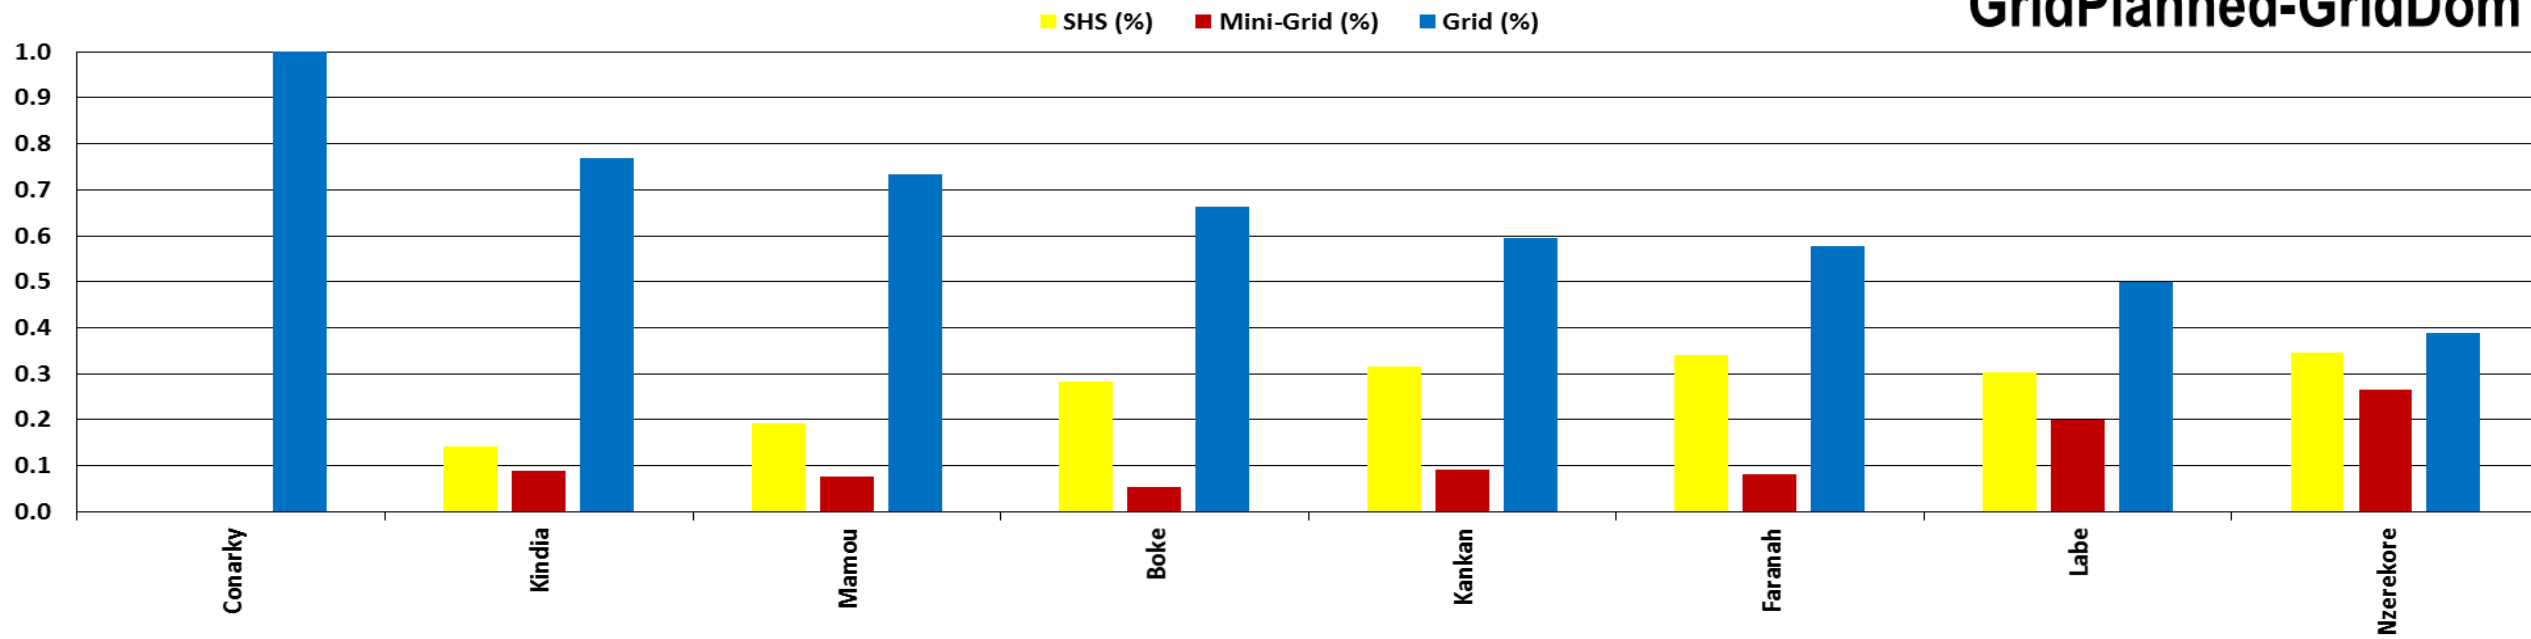

Share of electrification options in all Guinean regions

GridPlanned-SHSDom

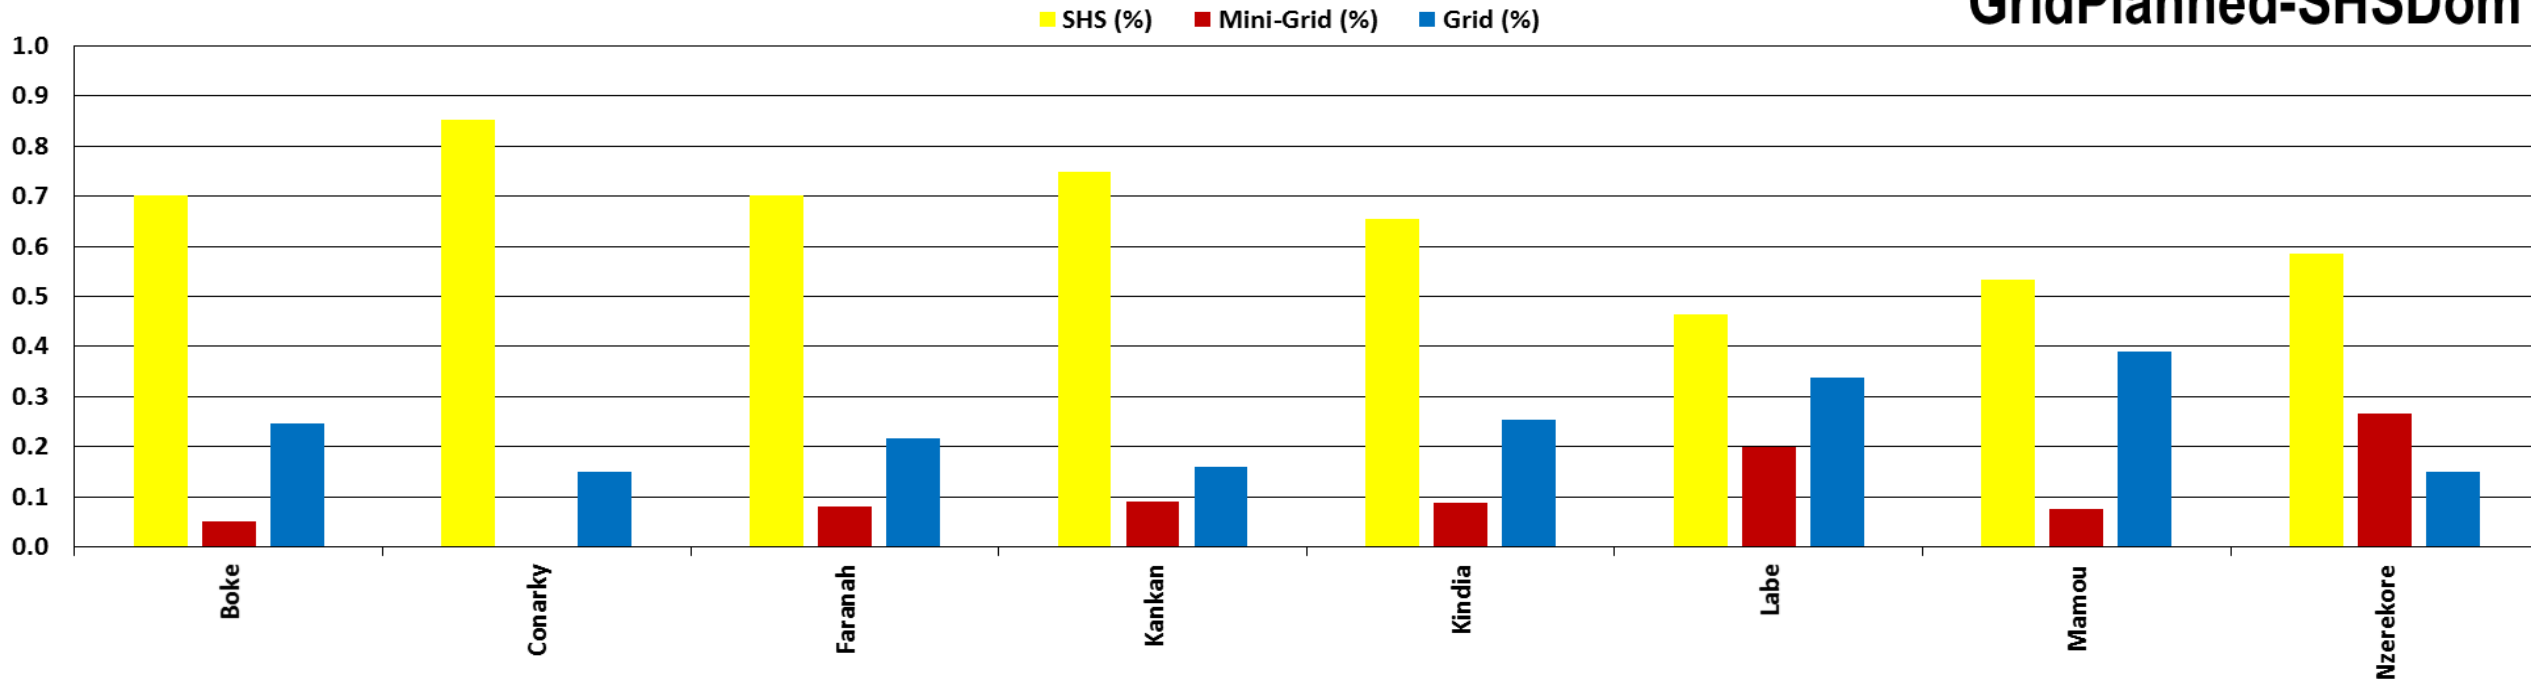

# Guinea-Bissau

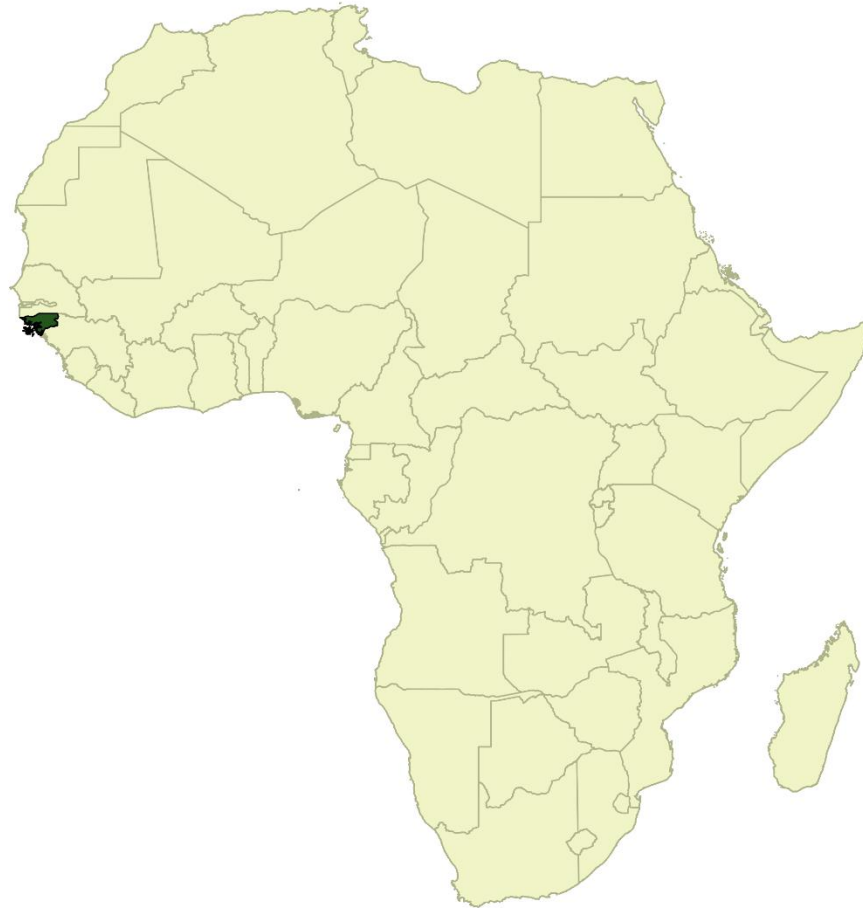

# Night light emission and Population of Guinea-Bissauan regions

Night light emission in Guinea-Bissau

Detected night lights

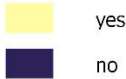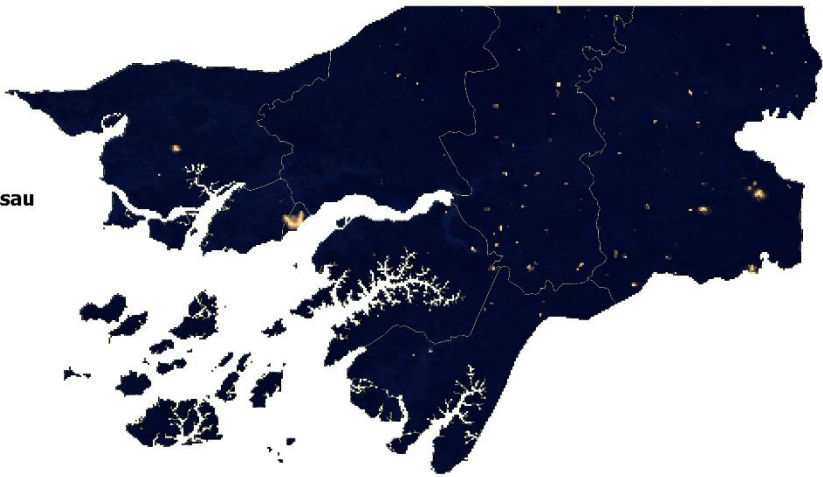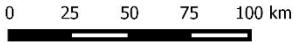

Population structure of Guinea-Bissau

Population density (people/750x750m<sup>2</sup>)

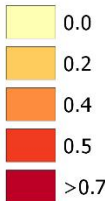

River and Lake (blue)

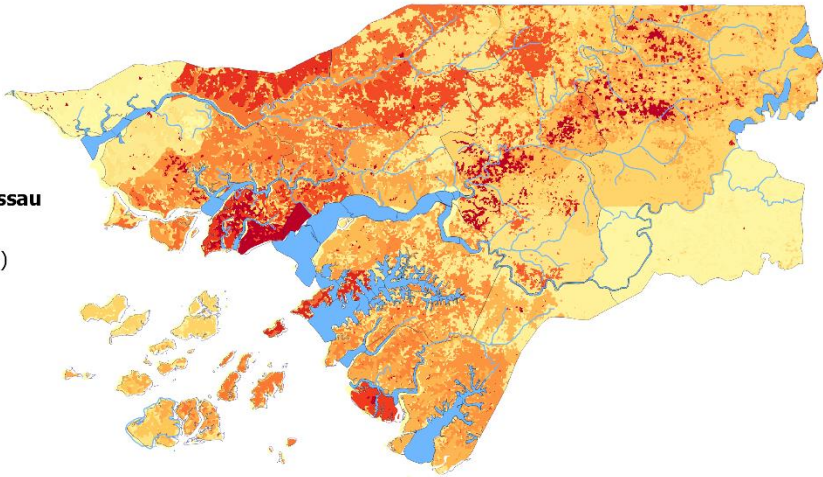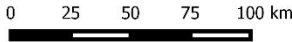

# Electrification option in all Guinea-Bissauan regions: GridBuilt-GridDom

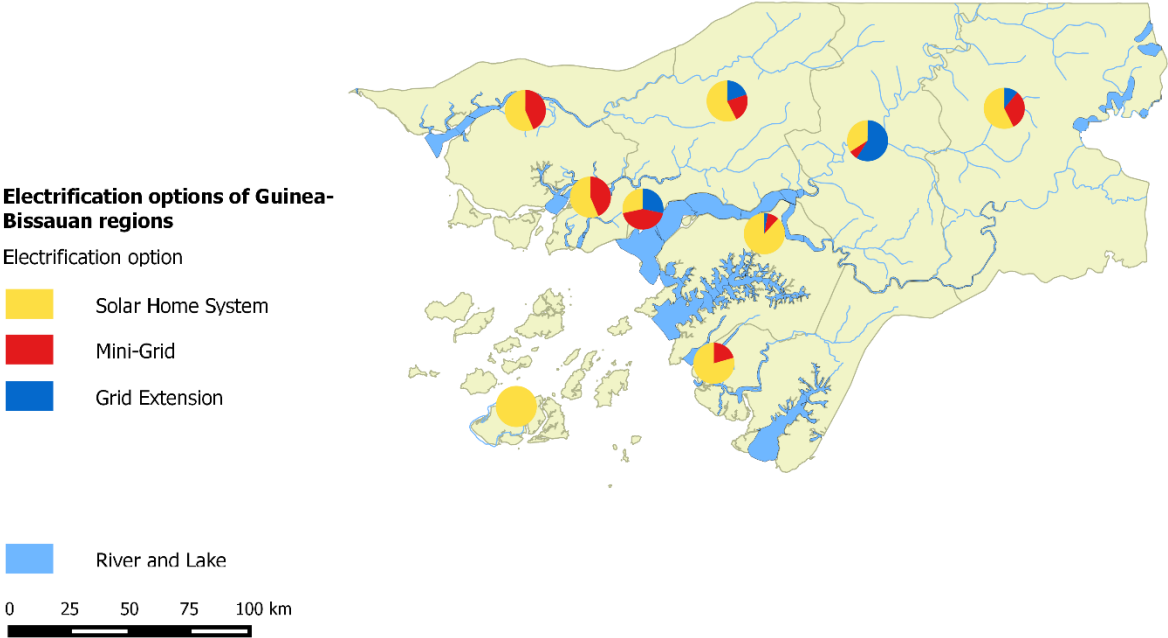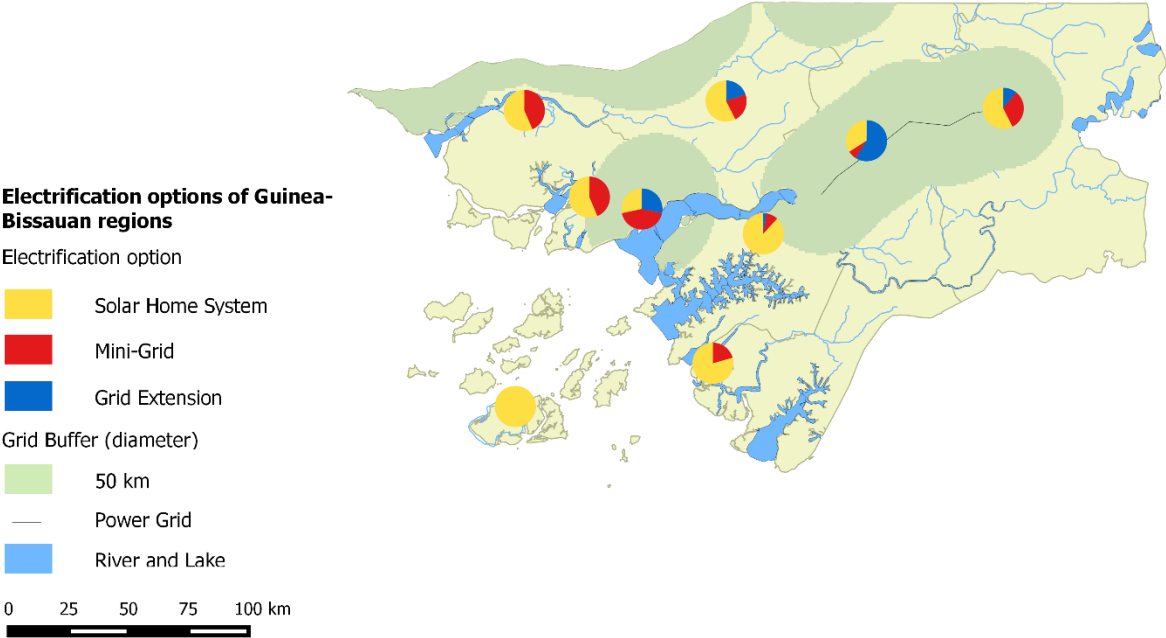

# Electrification option in all Guinea-Bissauan regions: GridBuilt-SHSDom

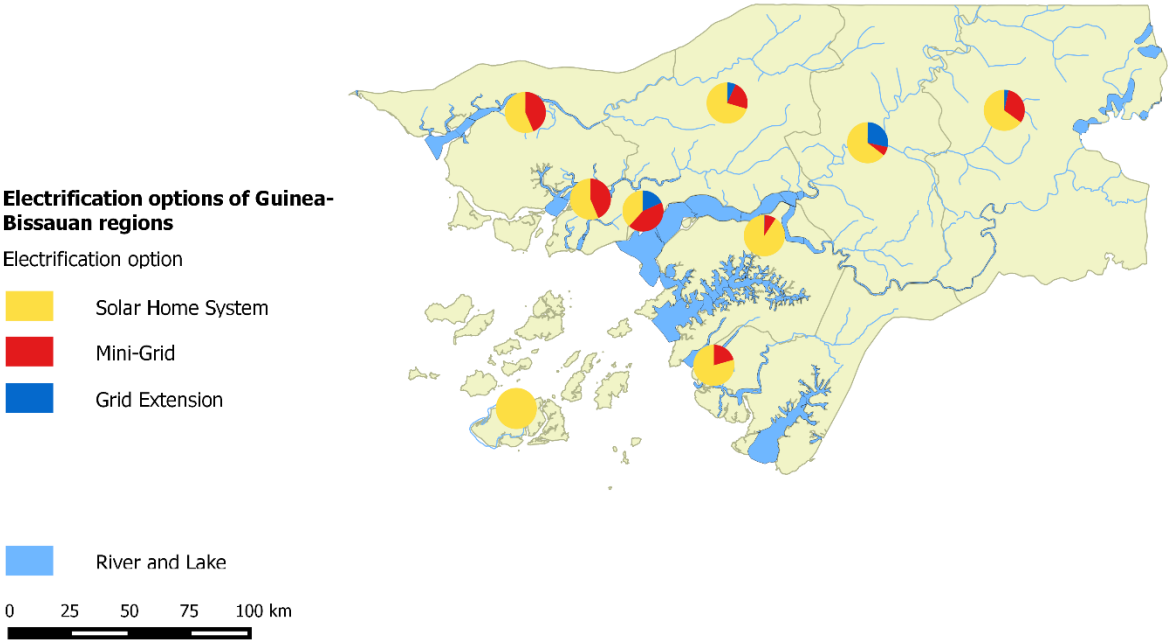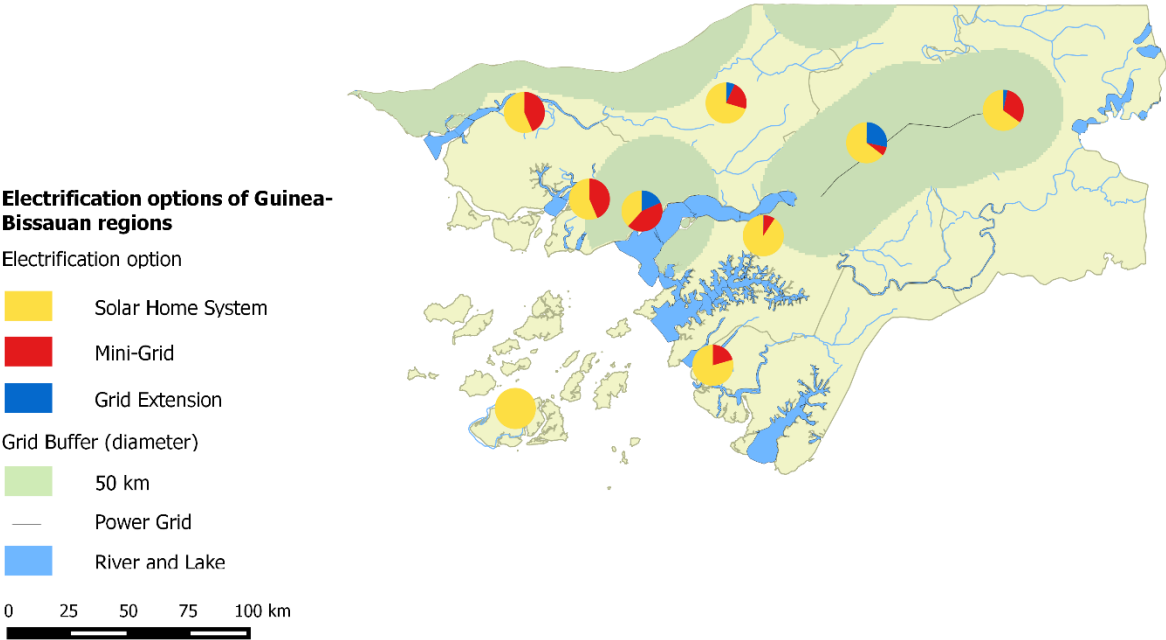

# Electrification option: GridBuilt-SHSDom

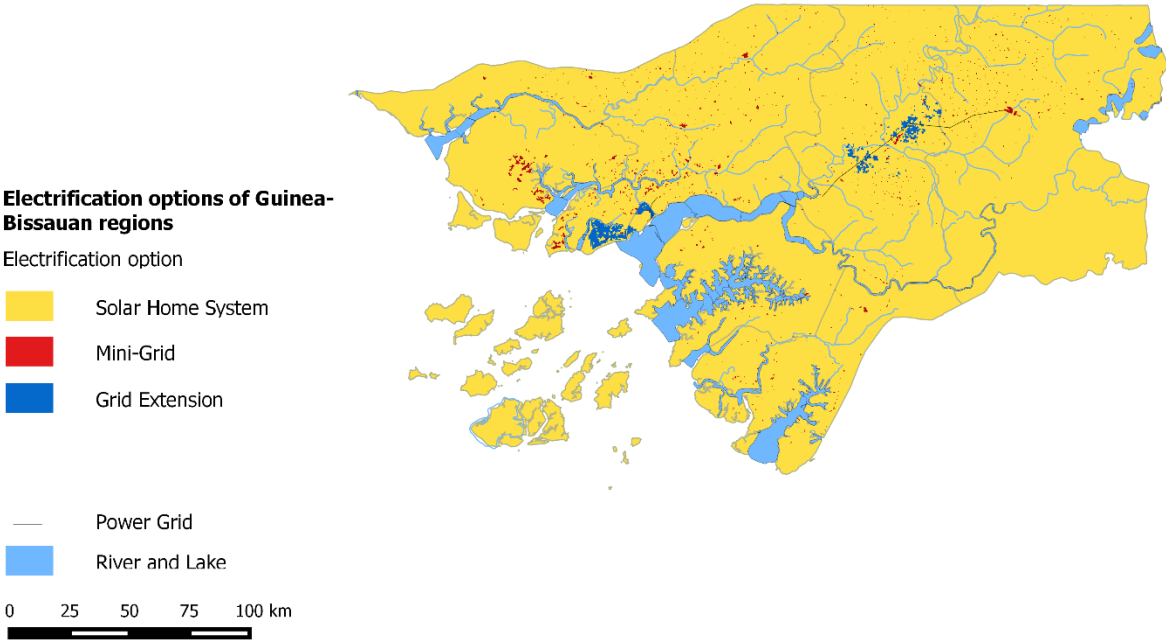

# Electrification option: GridBuilt-GridDom

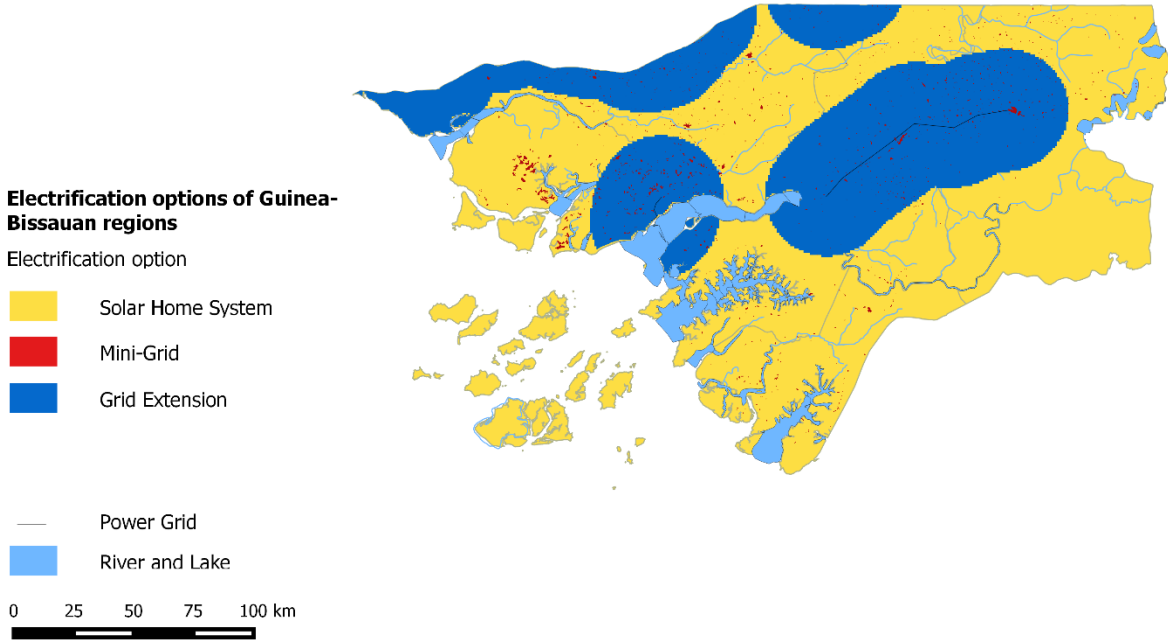

Share of electrification options in all Guinea-Bissauan regions

SHS (%) Mini-Grid (%) Grid (%)

GridBuilt-GridDom

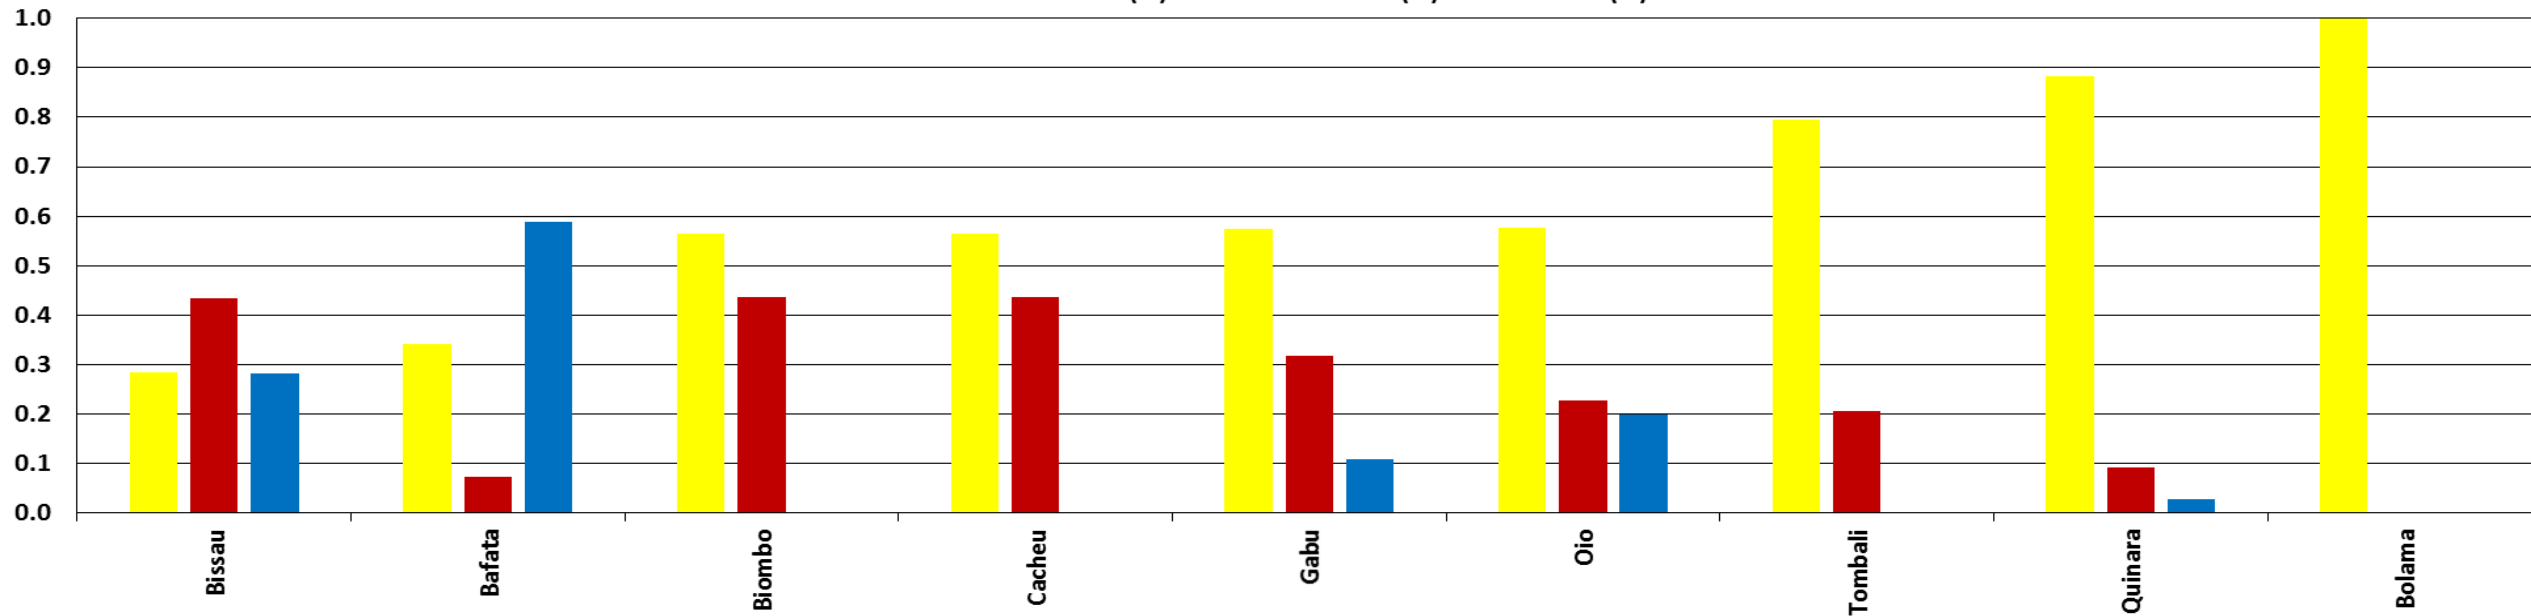

Share of electrification options in all Guinea-Bissauan regions

SHS (%) Mini-Grid (%) Grid (%)

GridBuilt-SHSDom

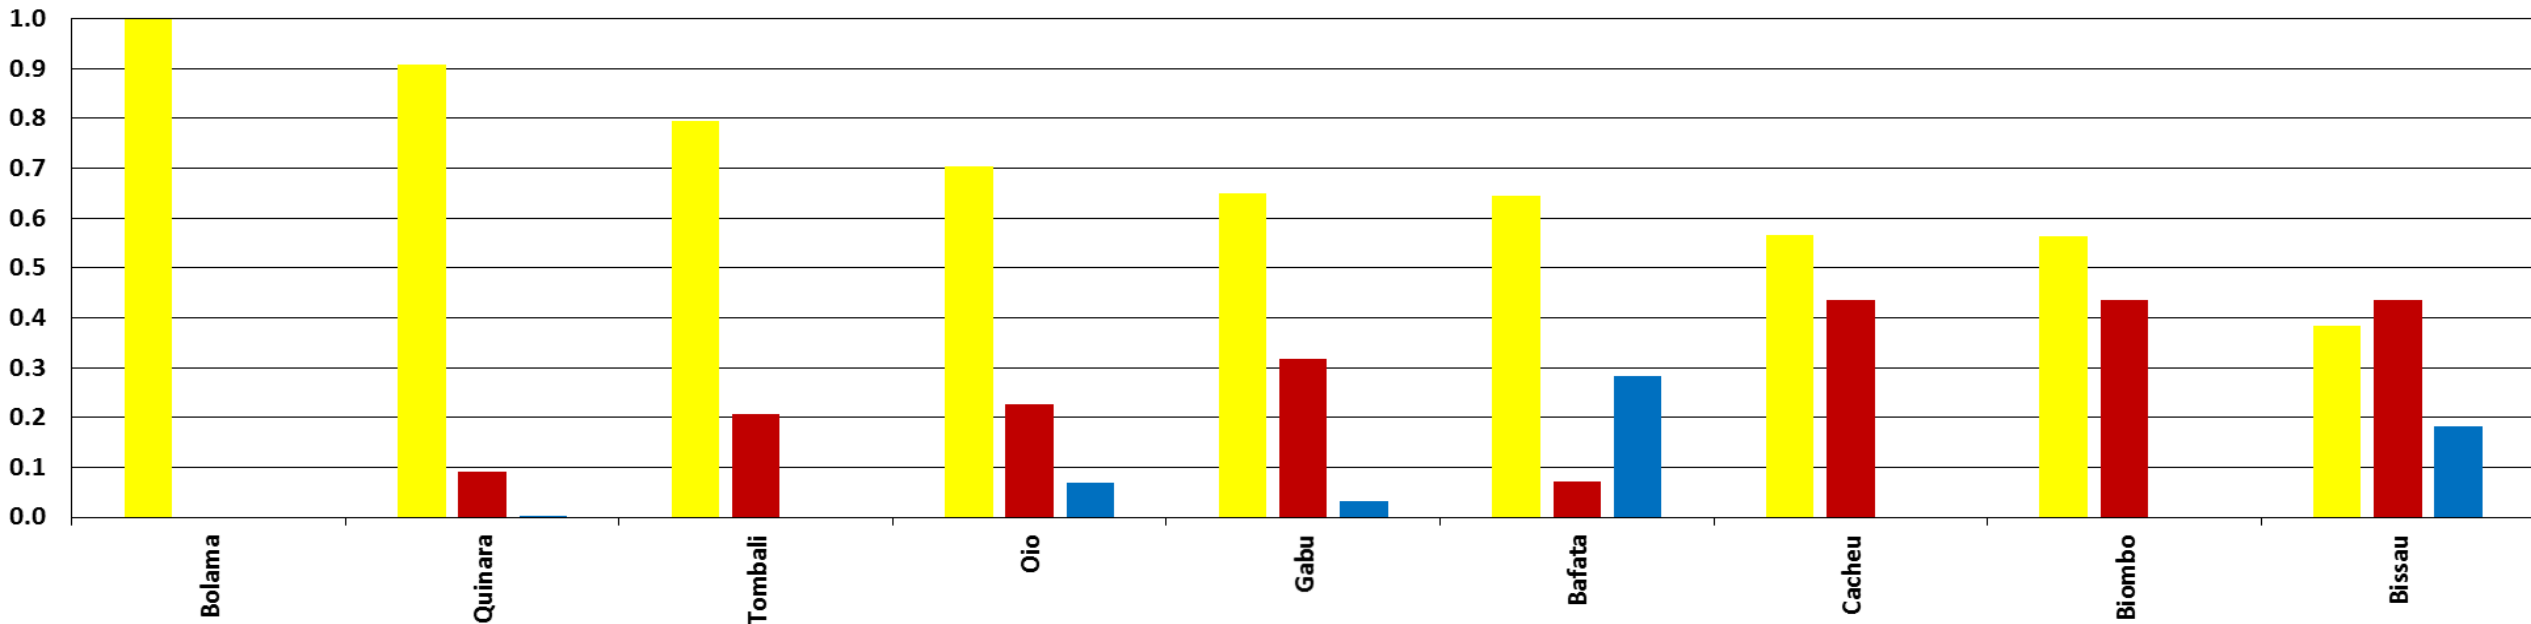

# Electrification option in all Guinea-Bissauan regions: GridPlanned-GridDom

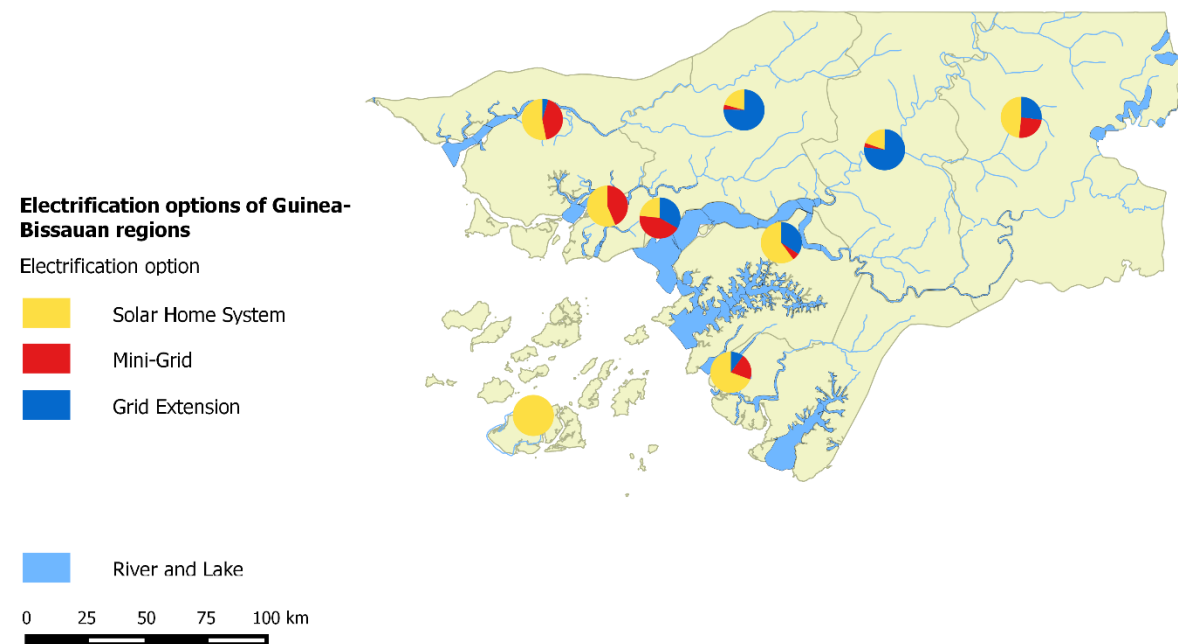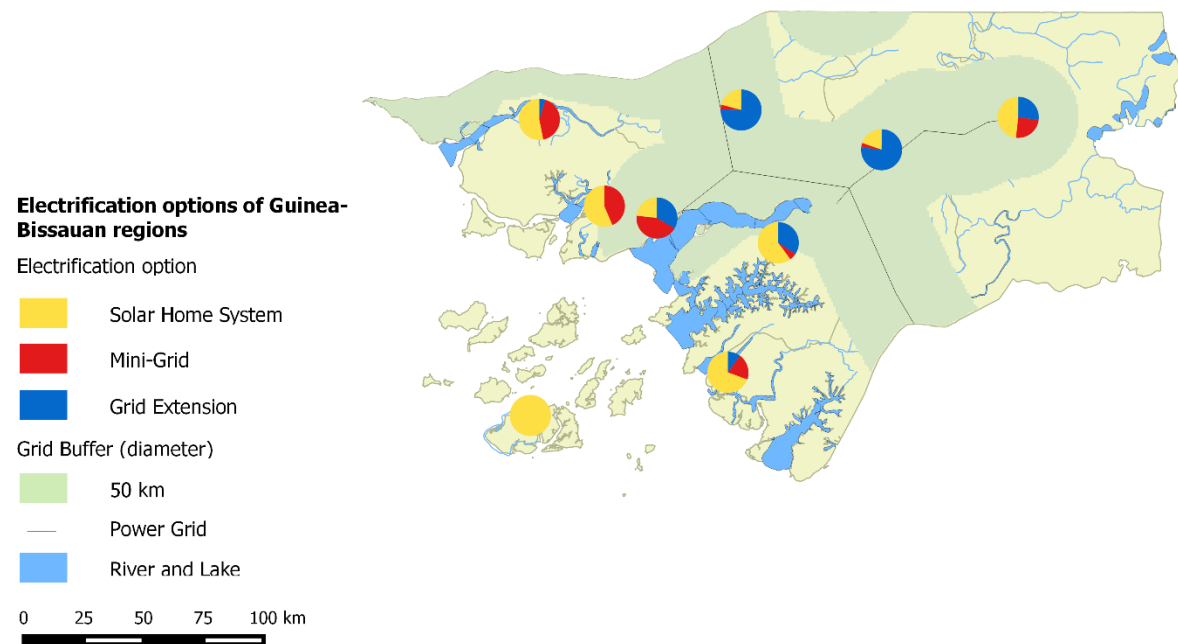

# Electrification option in all Guinea-Bissauan regions: GridPlanned-SHSDom

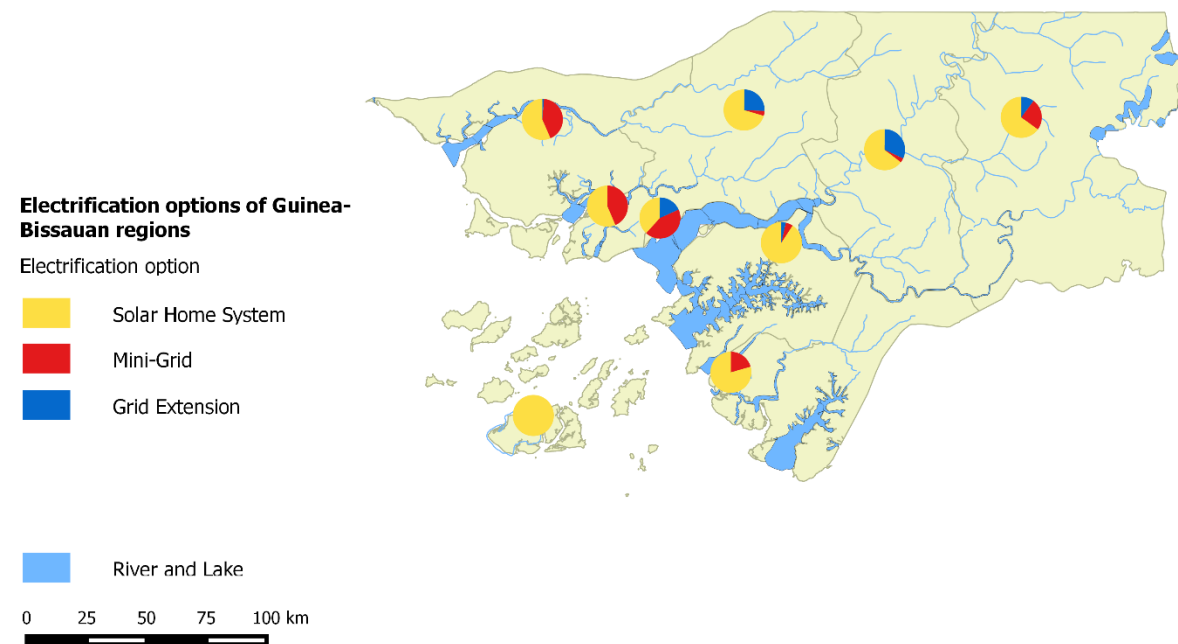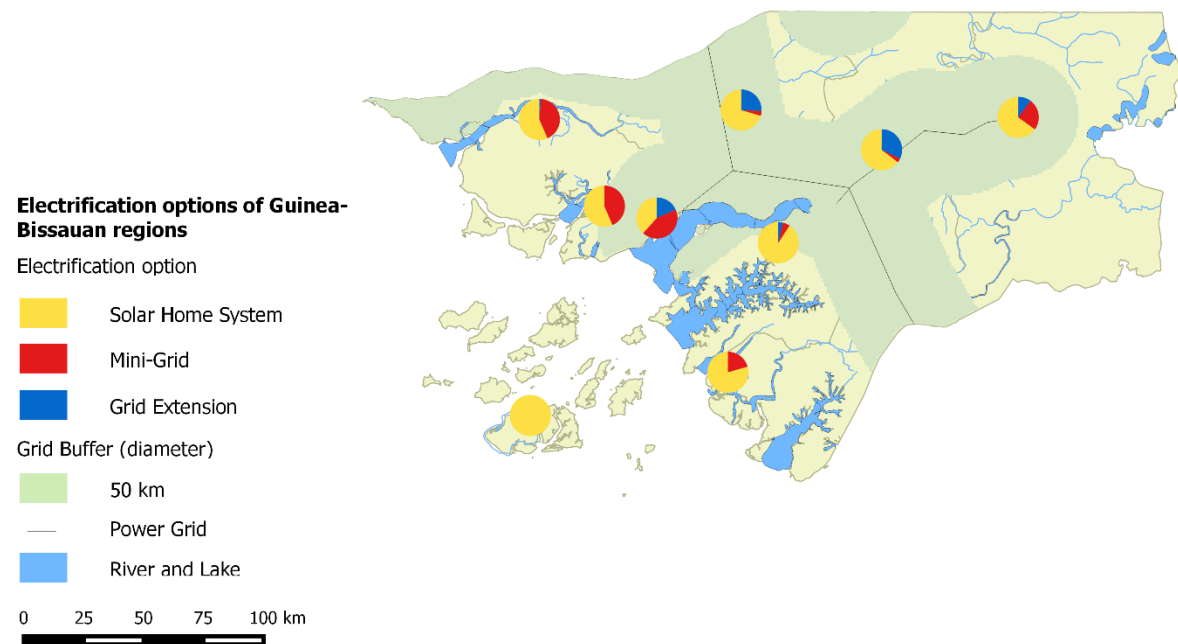

# Electrification option: GridPlanned-SHSDom

# Electrification option: GridPlanned-GridDom

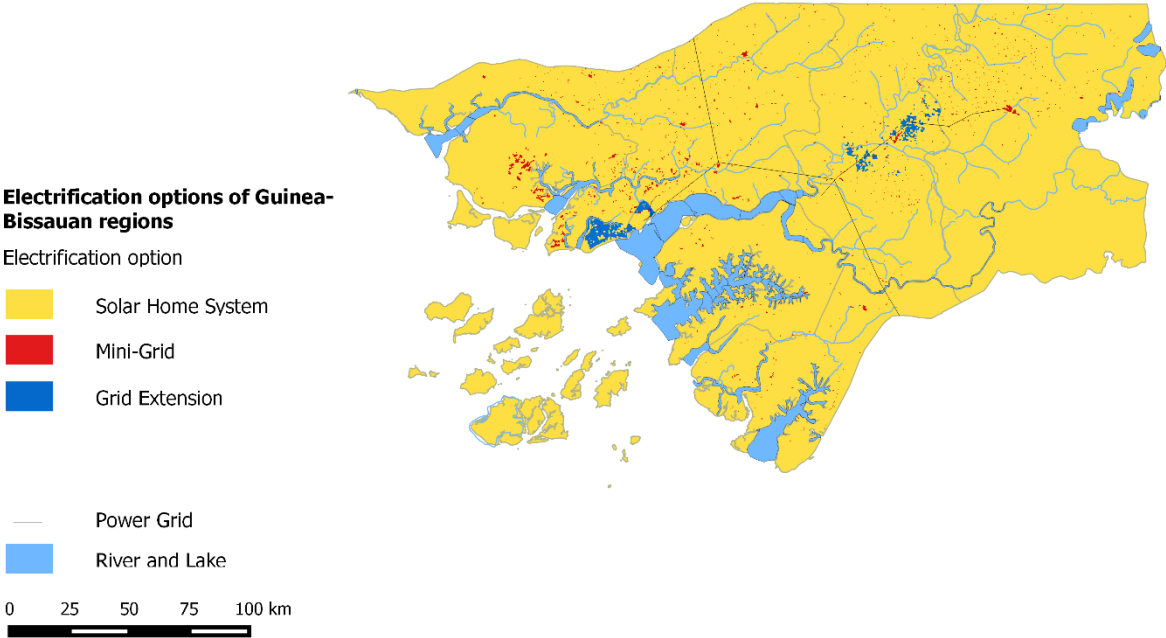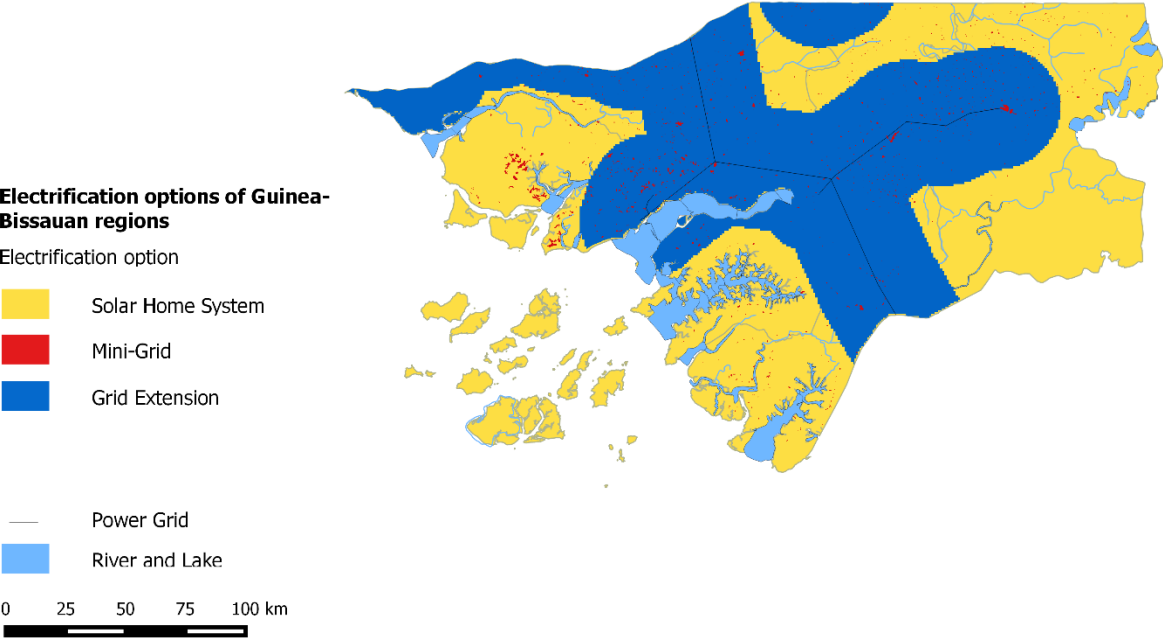

Share of electrification options in all Guinea-Bissauan regions

SHS (%) Mini-Grid (%) Grid (%)

GridPlanned-GridDom

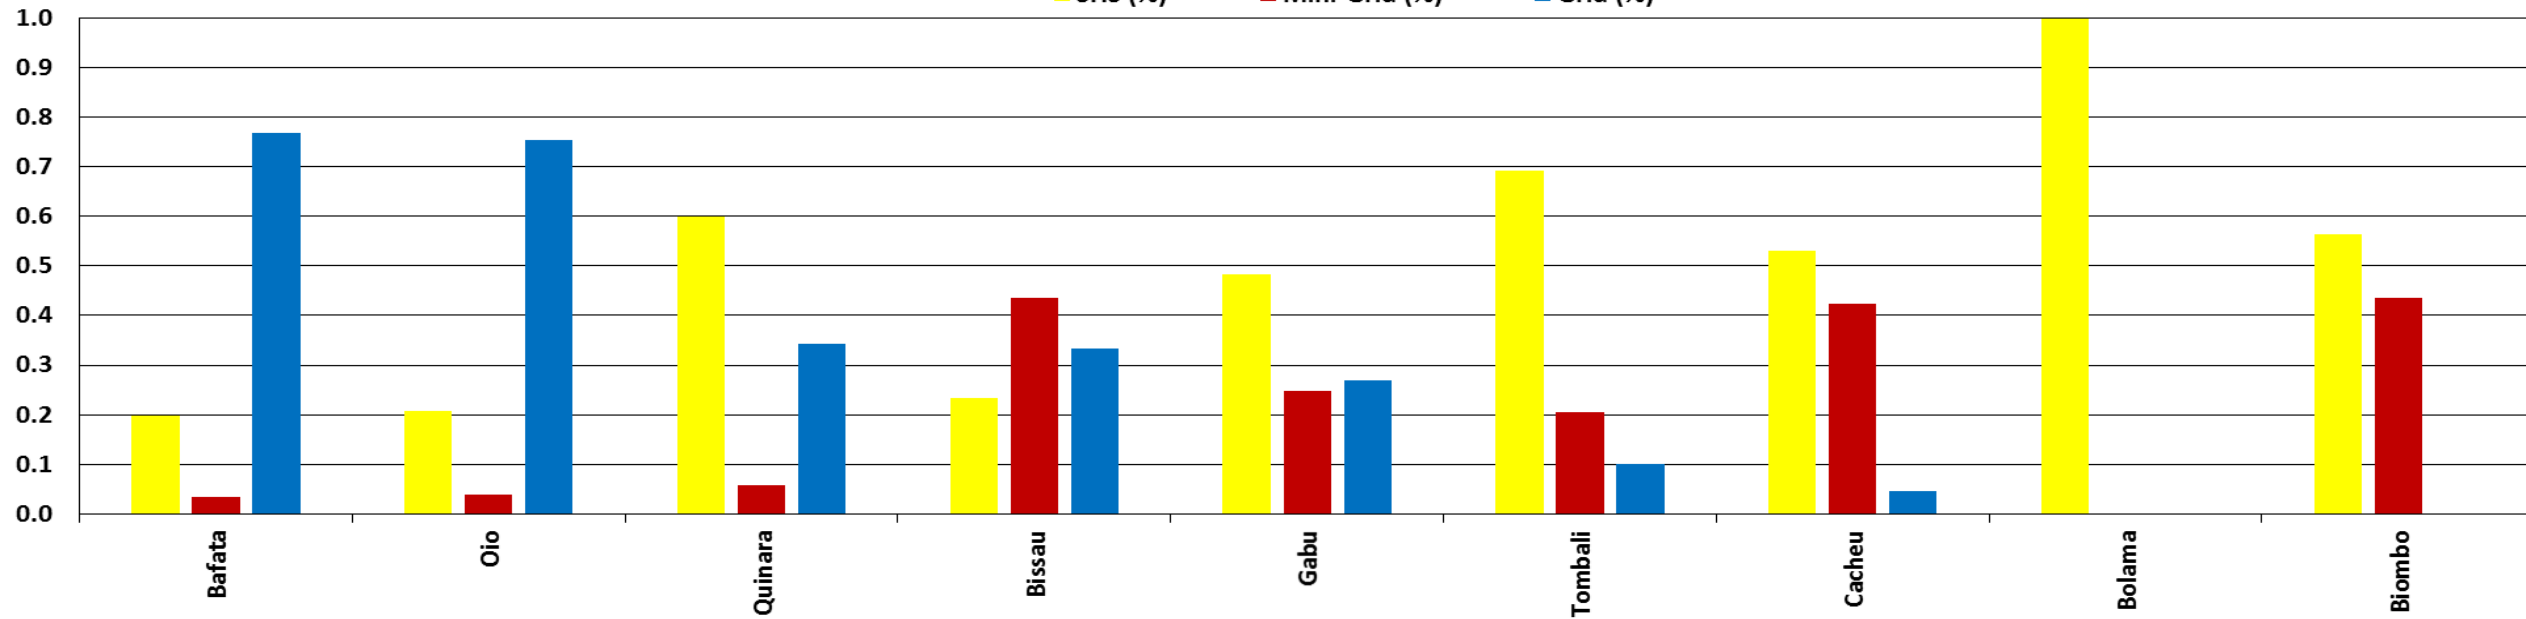

Share of electrification options in all Guinea-Bissauan regions

SHS (%) Mini-Grid (%) Grid (%)

GridPlanned-SHSDom

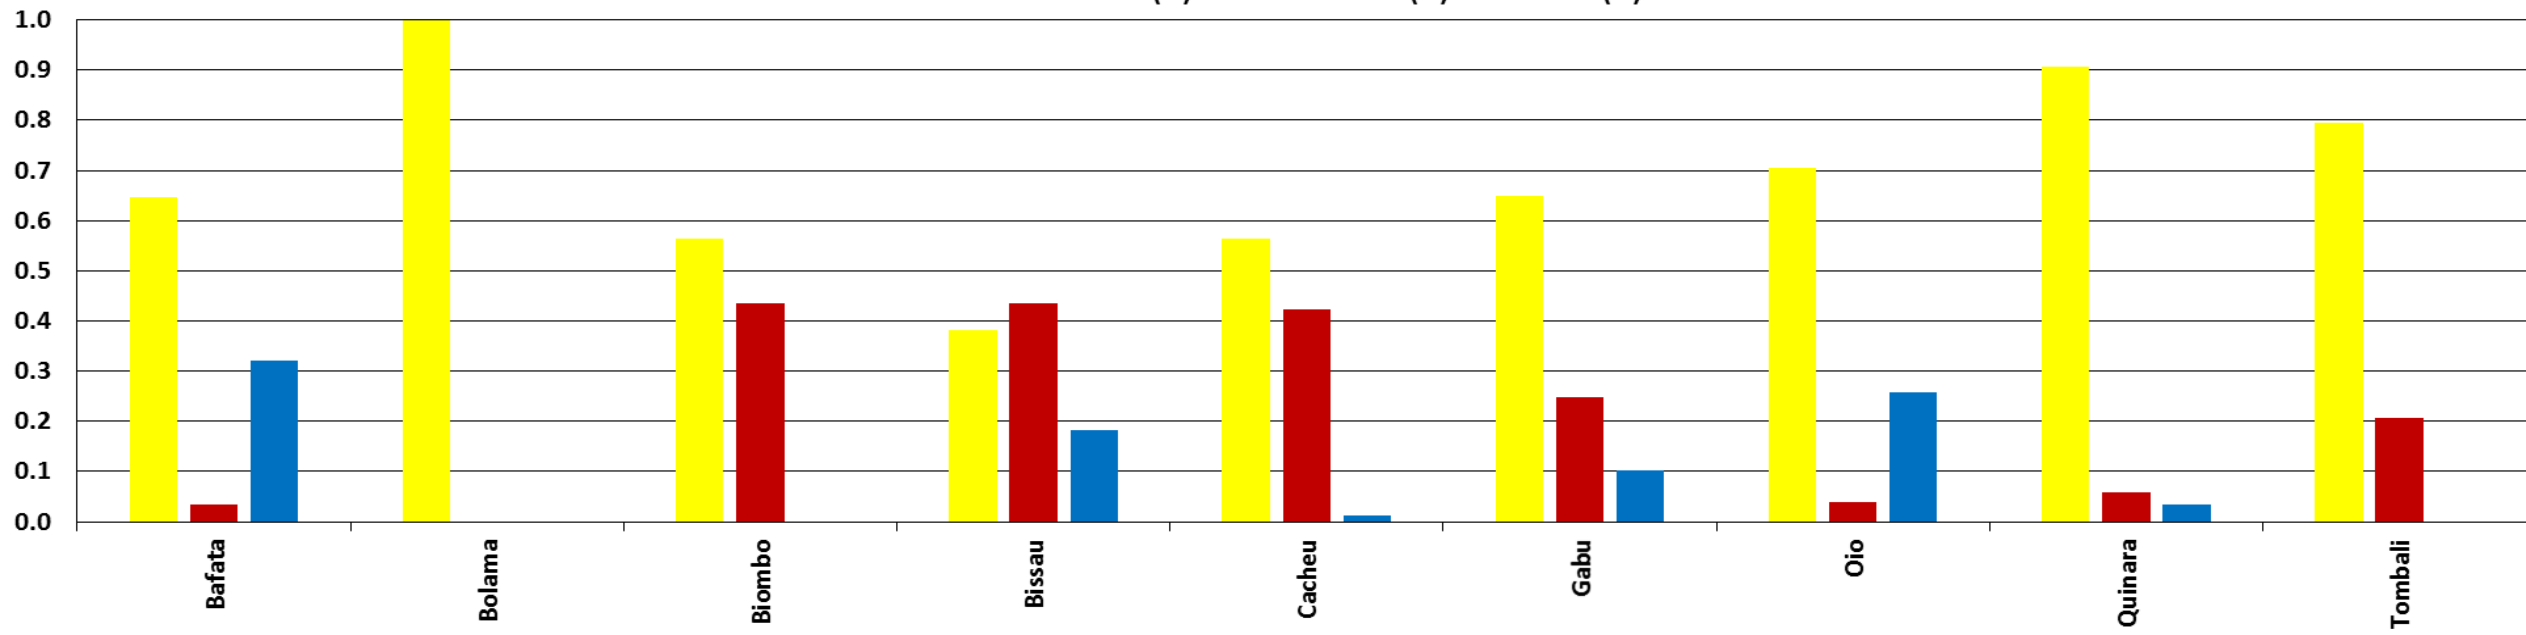

# Liberia

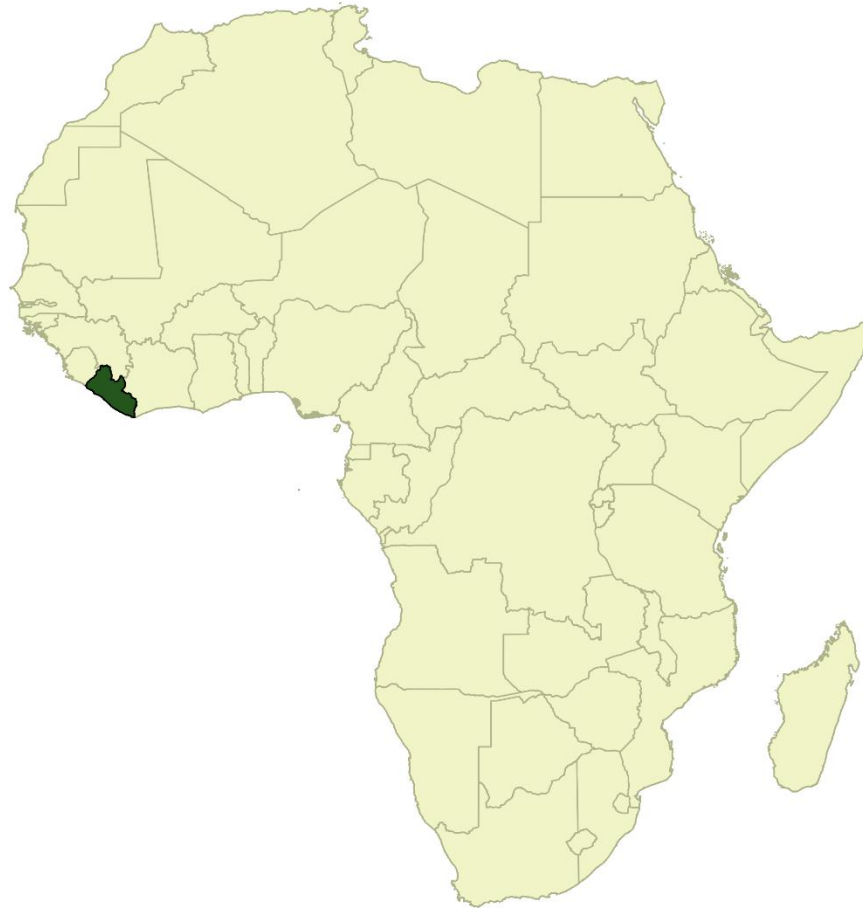

# Night light emission and Population of Liberian regions

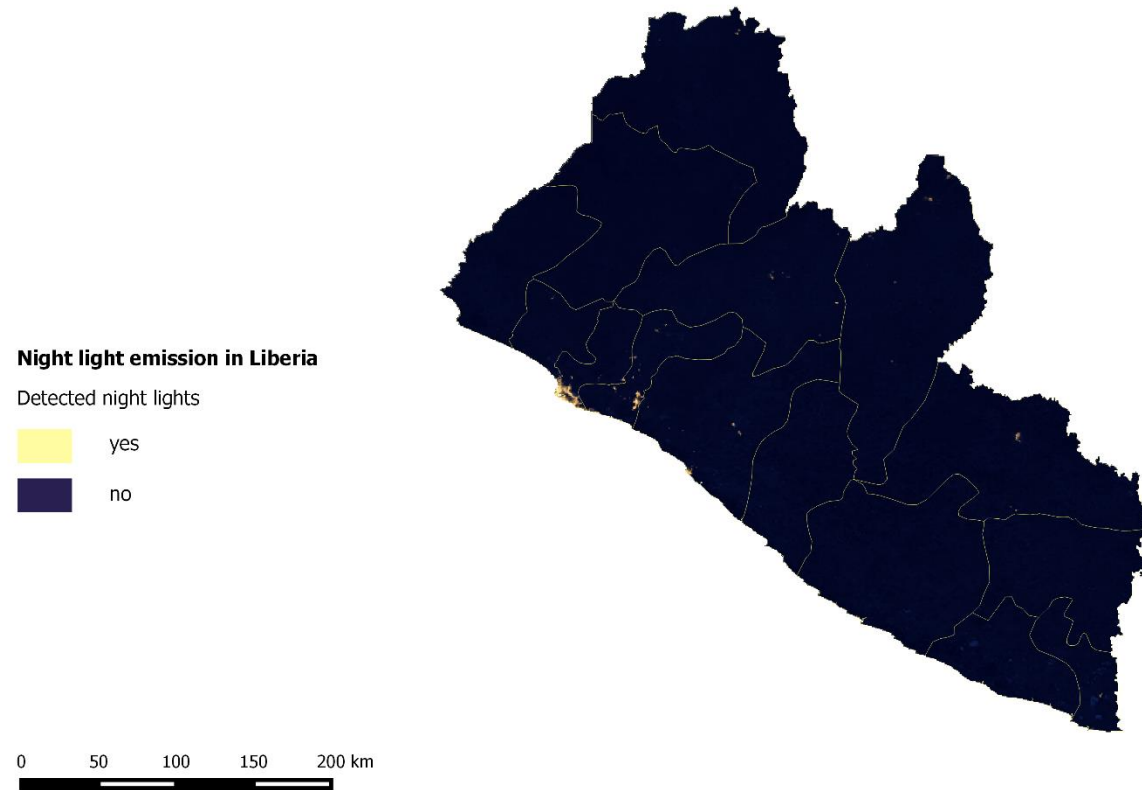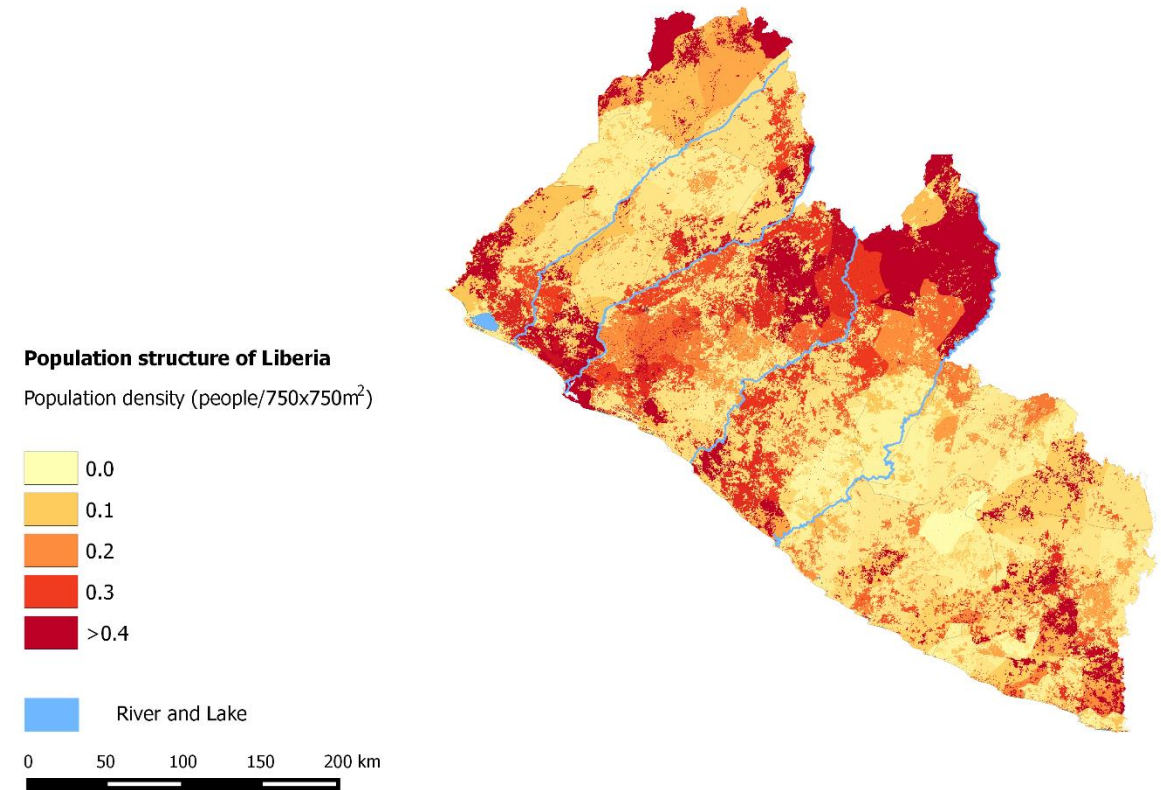

## Electrification option in all Liberian regions: GridBuilt-GridDom

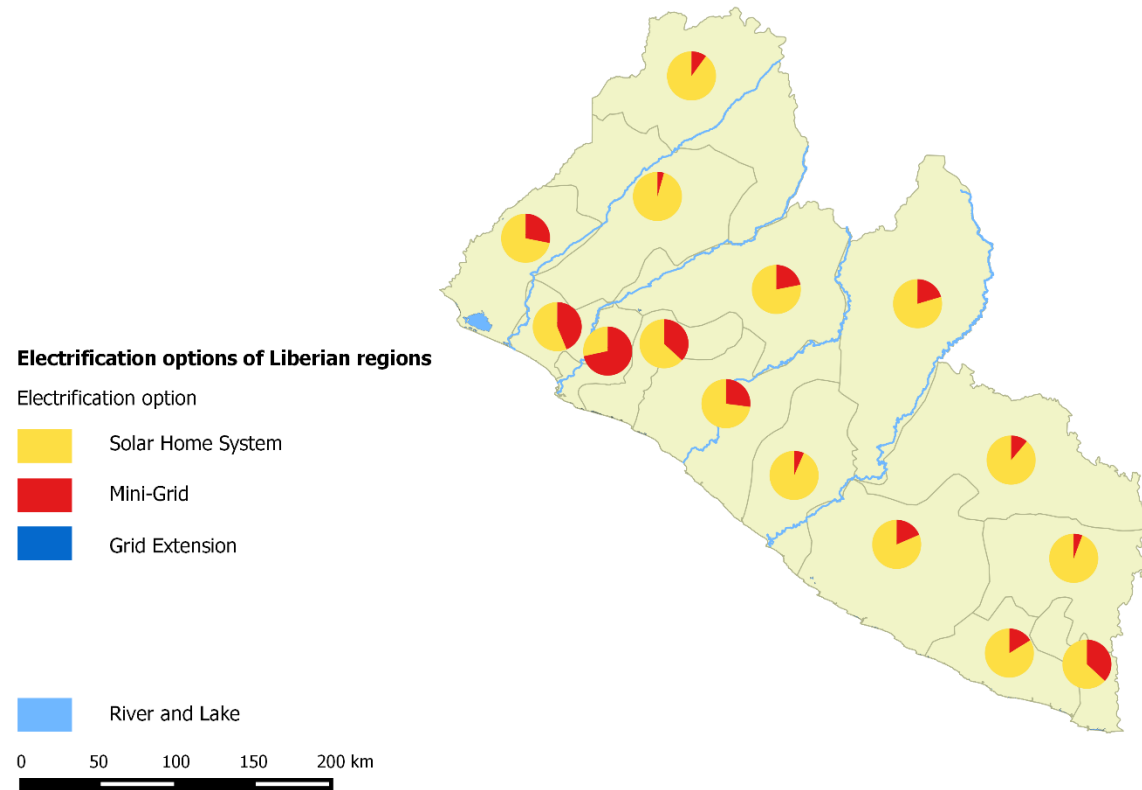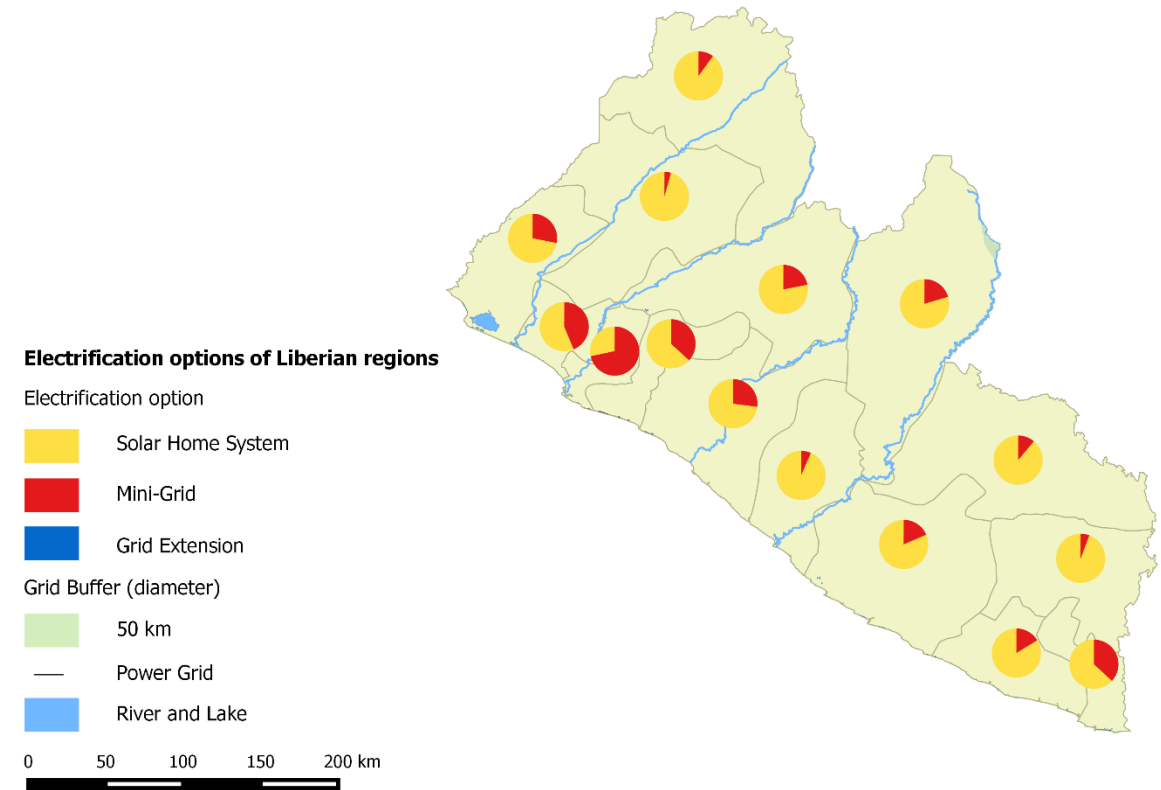

# Electrification option in all Liberian regions: GridBuilt-SHSDom

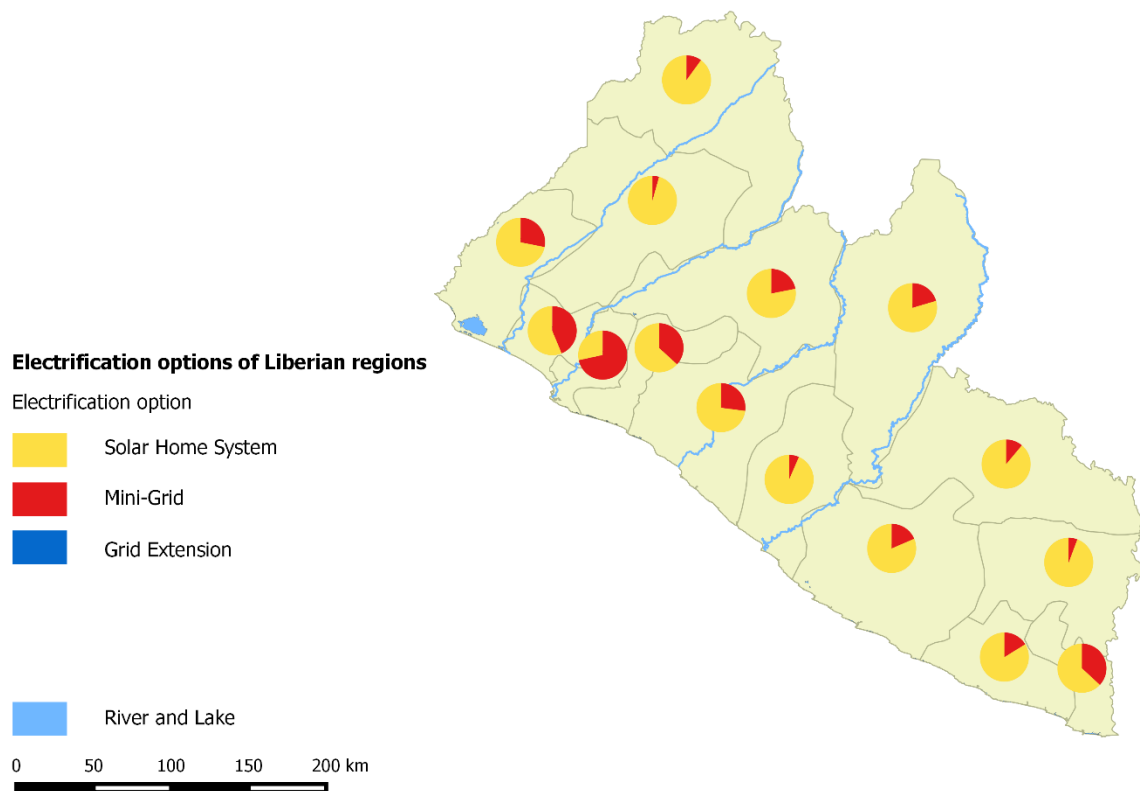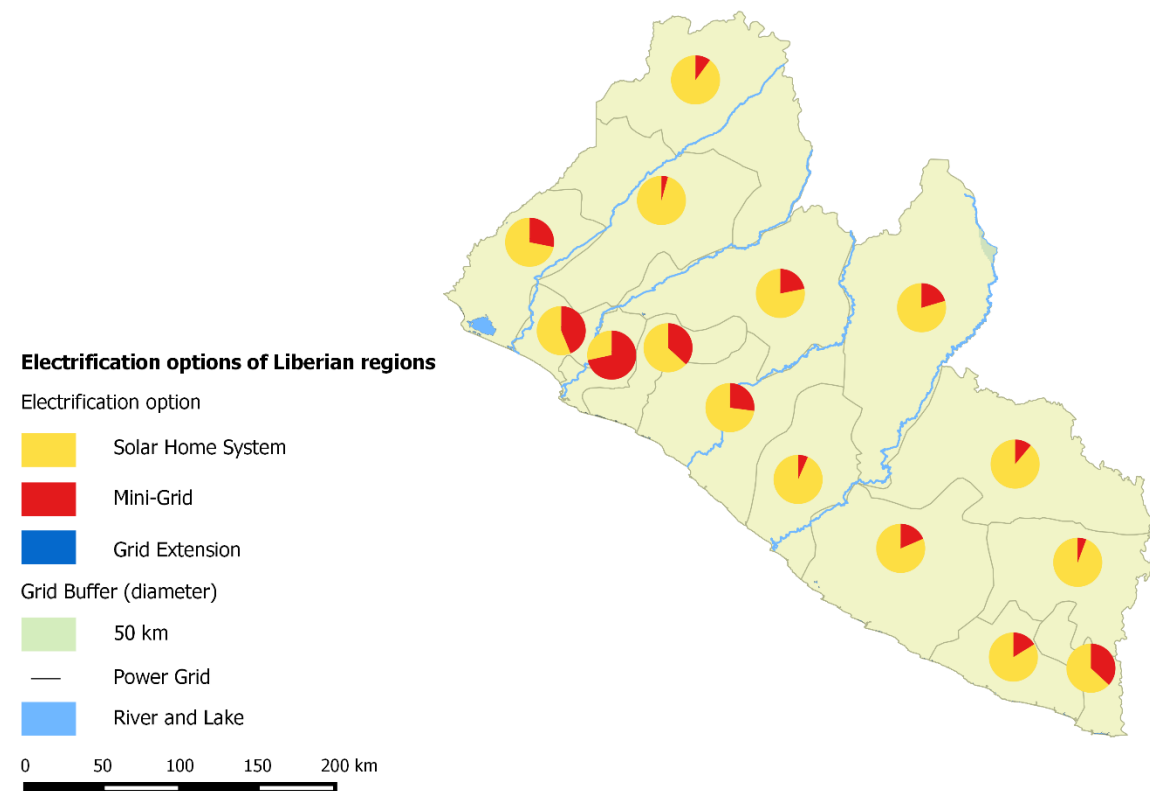

# Electrification option: GridBuilt-SHSDom

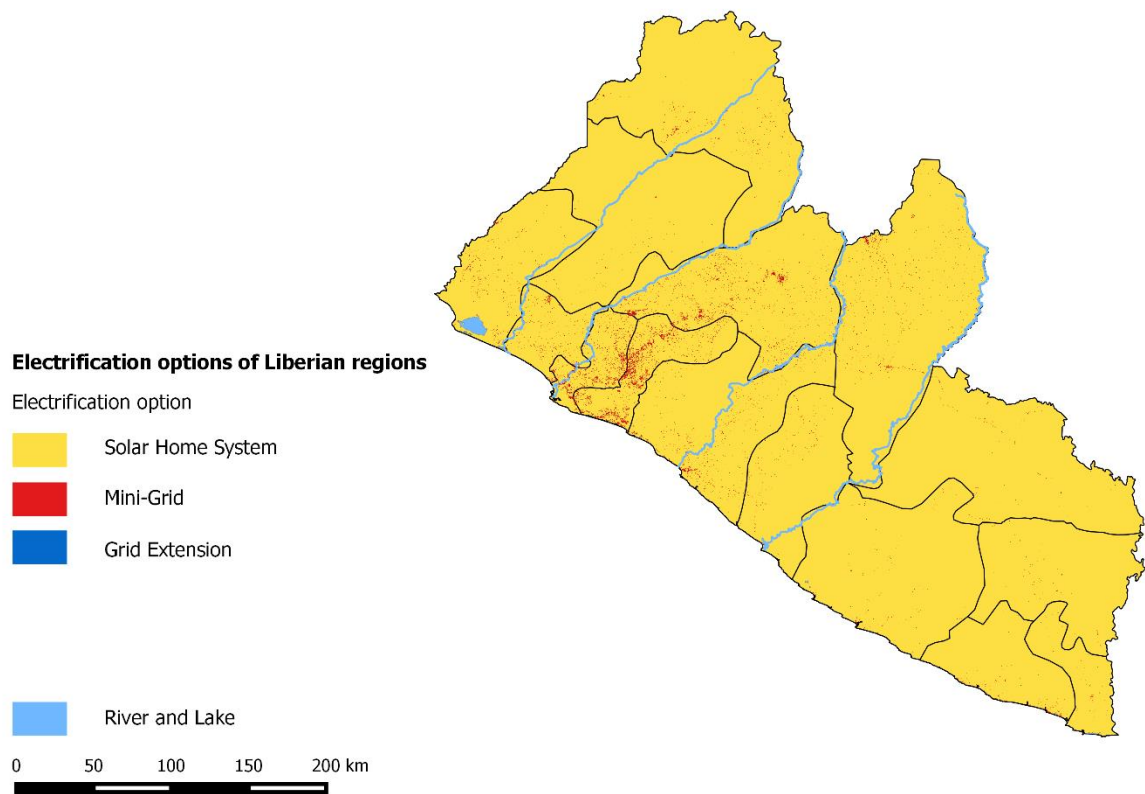

# Electrification option: GridBuilt-GridDom

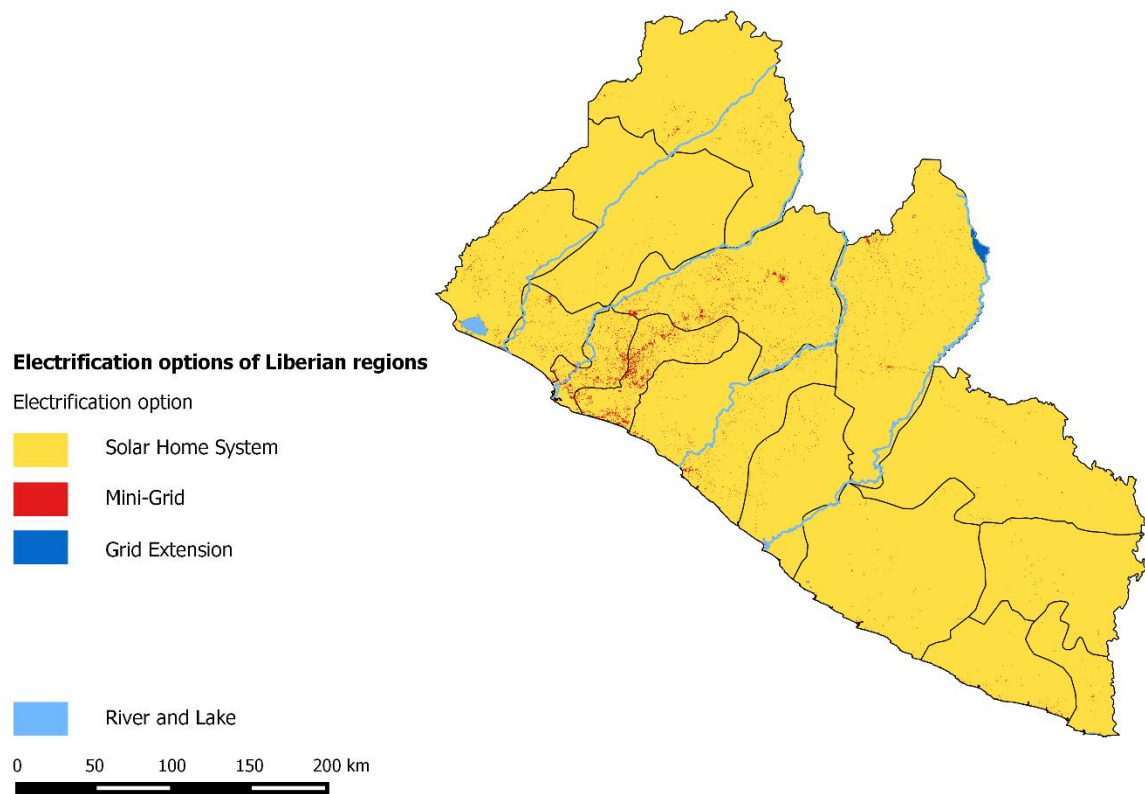

Share of electrification options in all Liberian regions

GridBuilt-GridDom

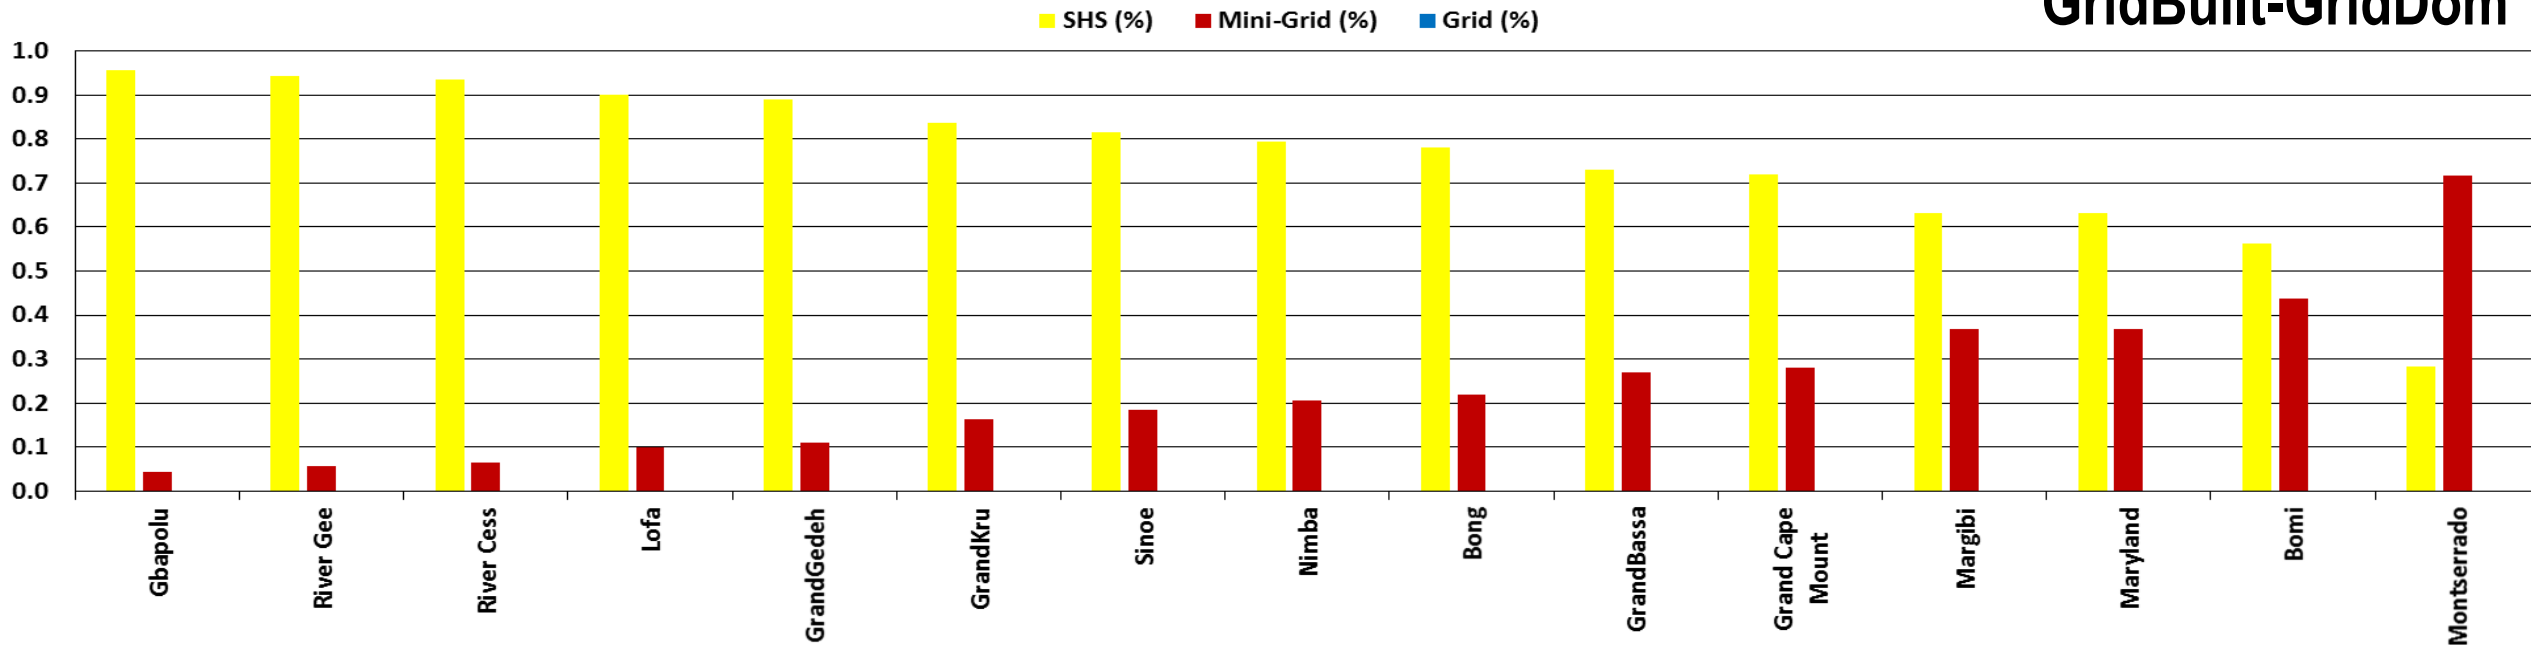

Share of electrification options in all Liberian region

GridBuilt-SHSDom

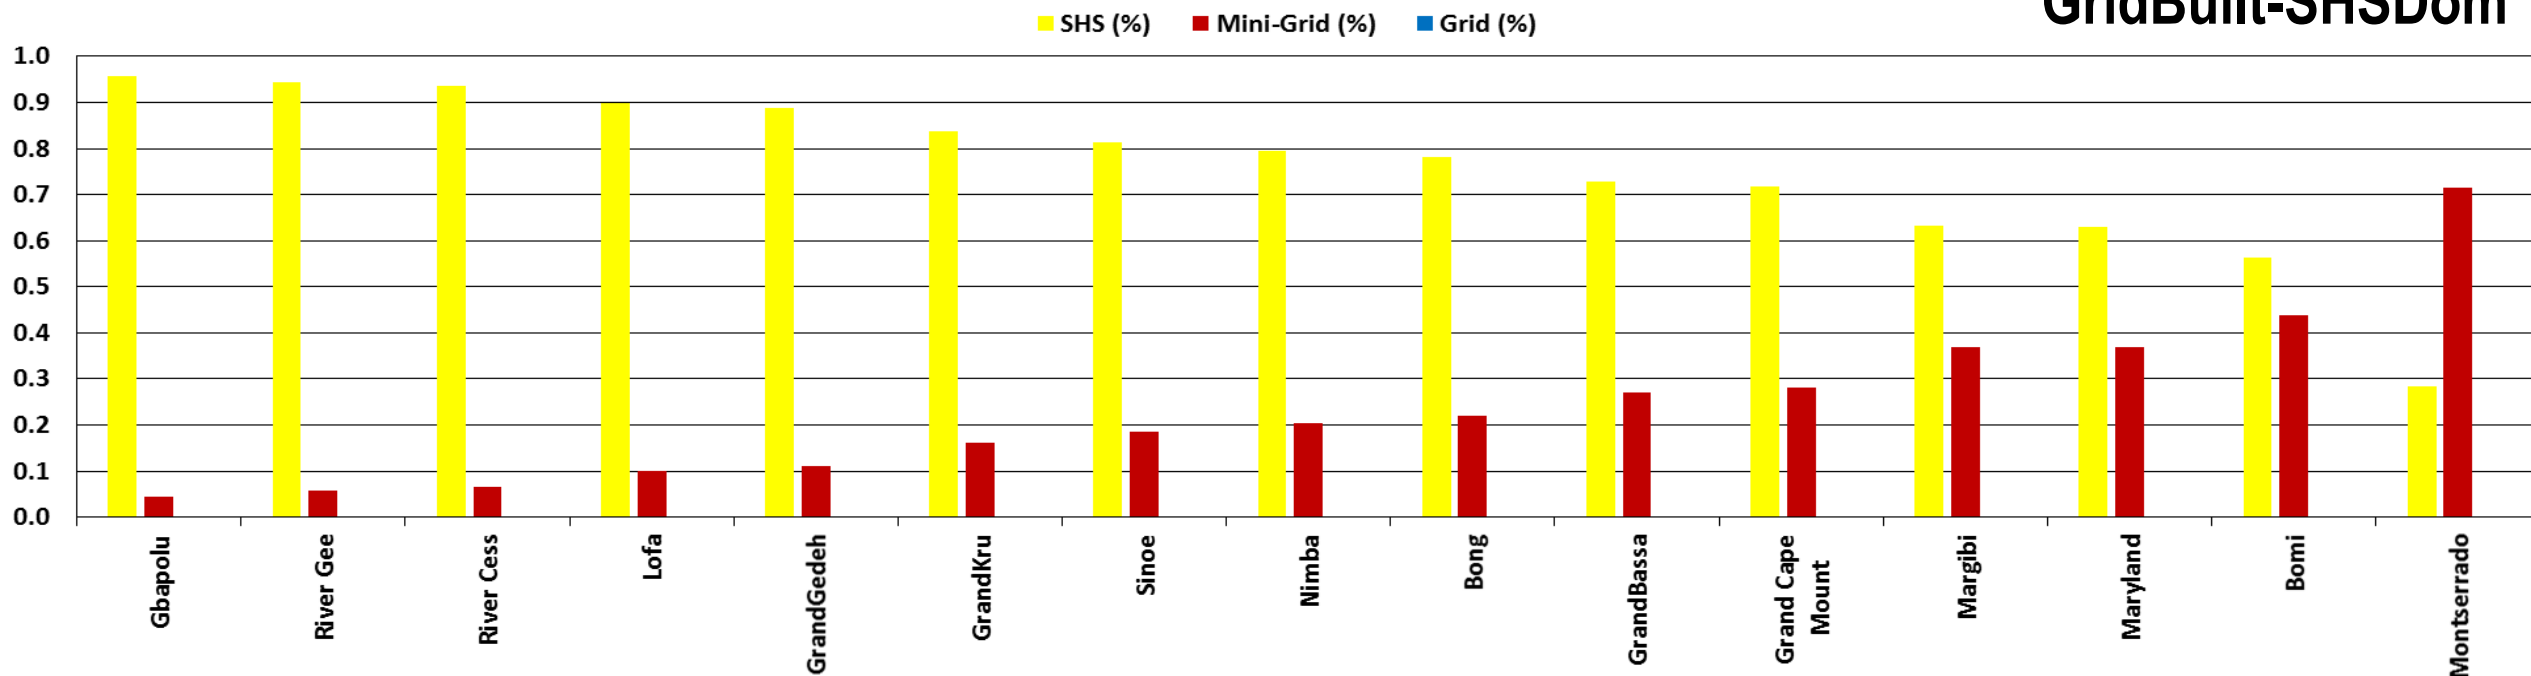

# Electrification option in all Liberian regions: GridPlanned-GridDom

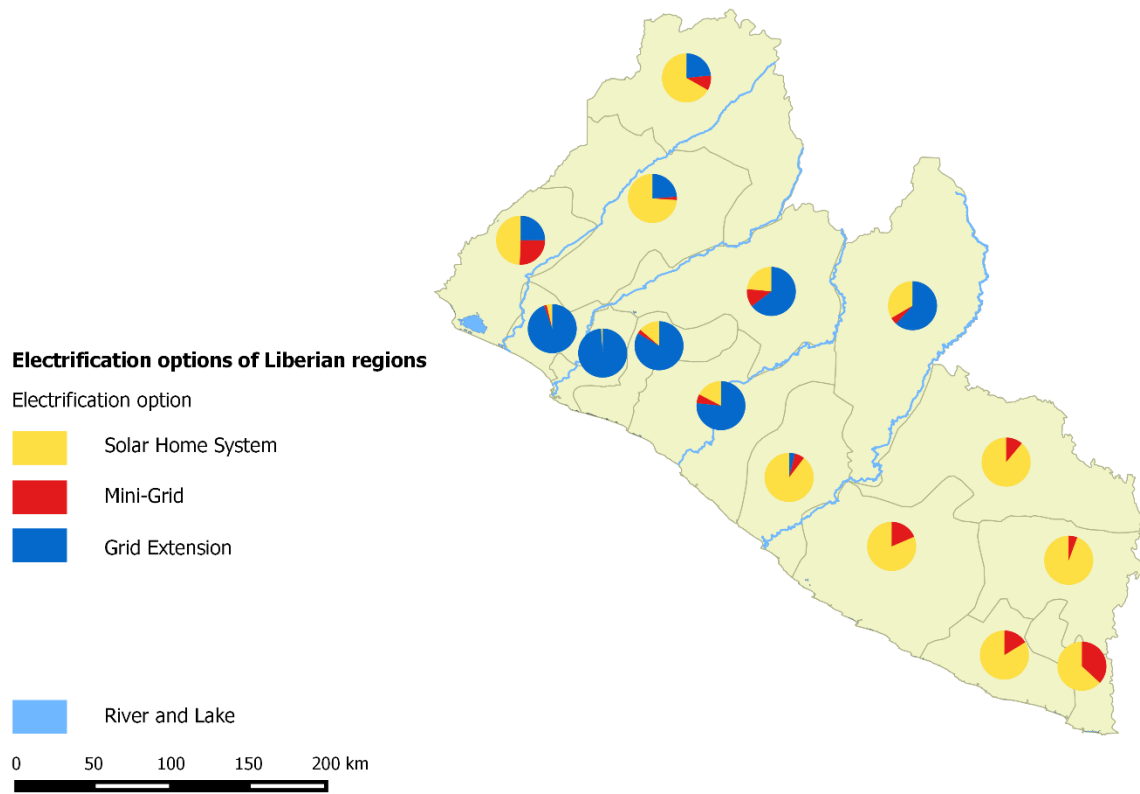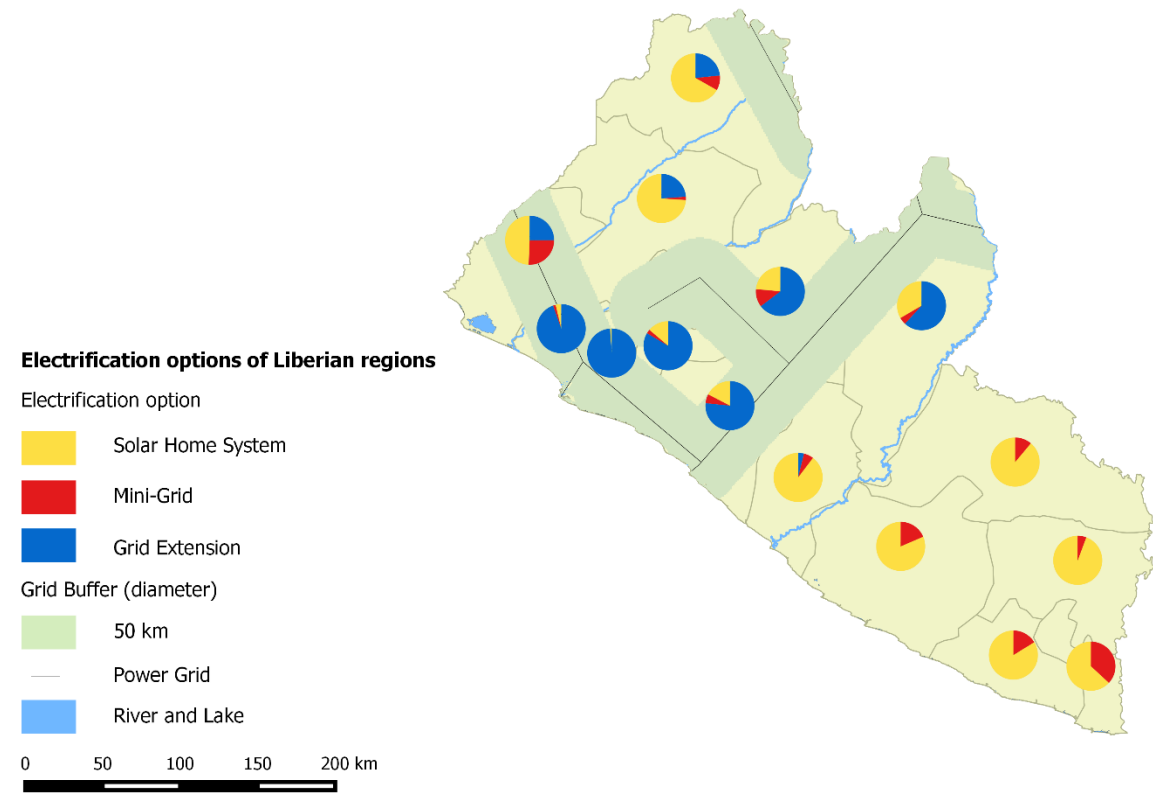

# Electrification option in all Liberian regions: GridPlanned-SHSDom

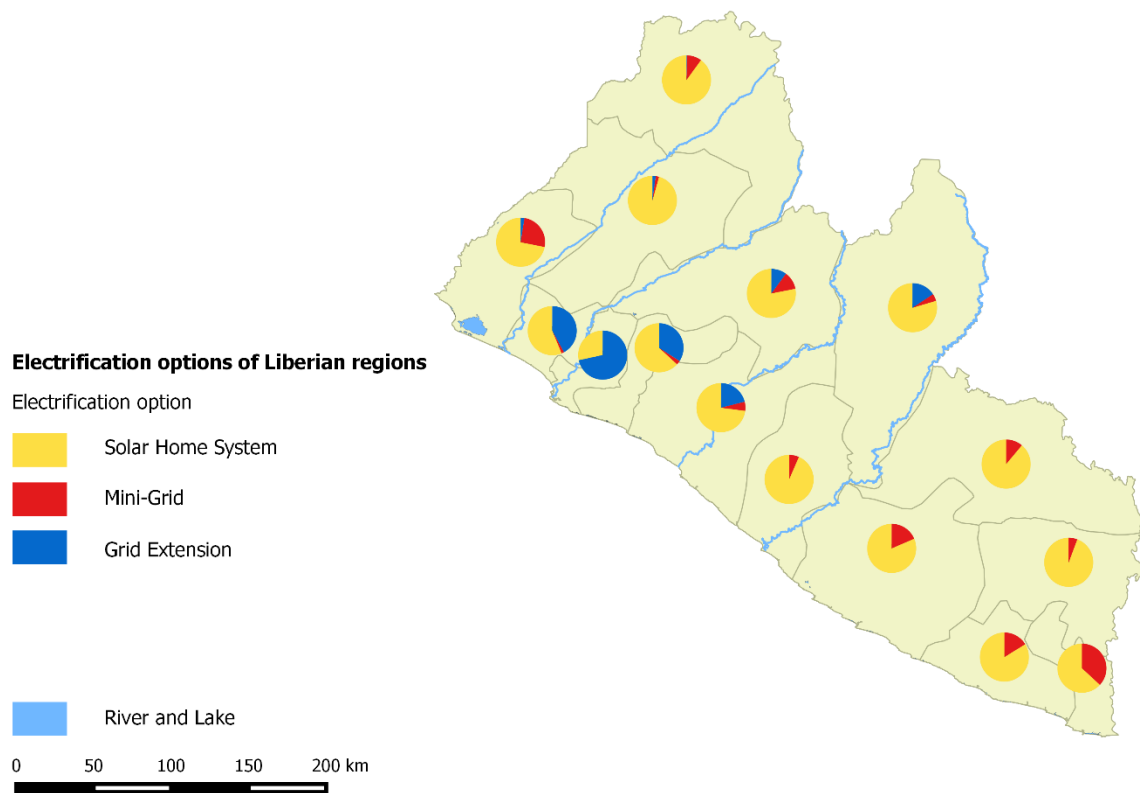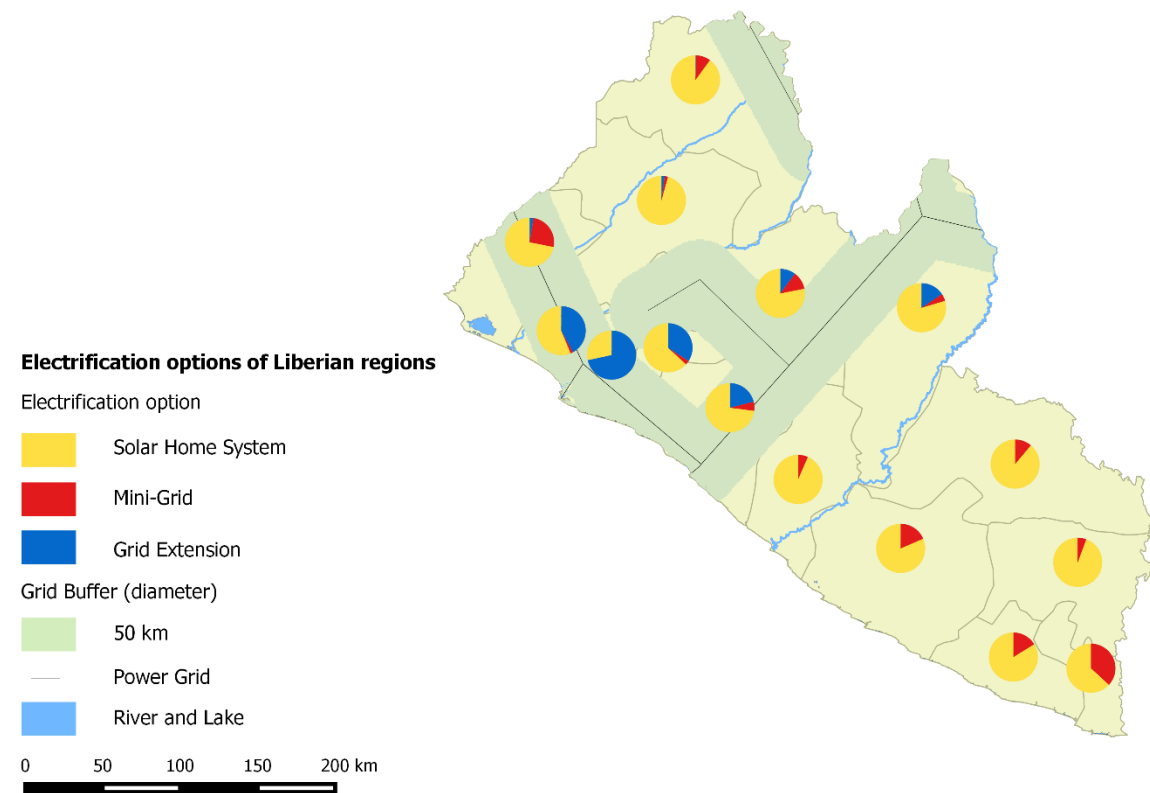

# Electrification option: GridPlanned-SHSDom

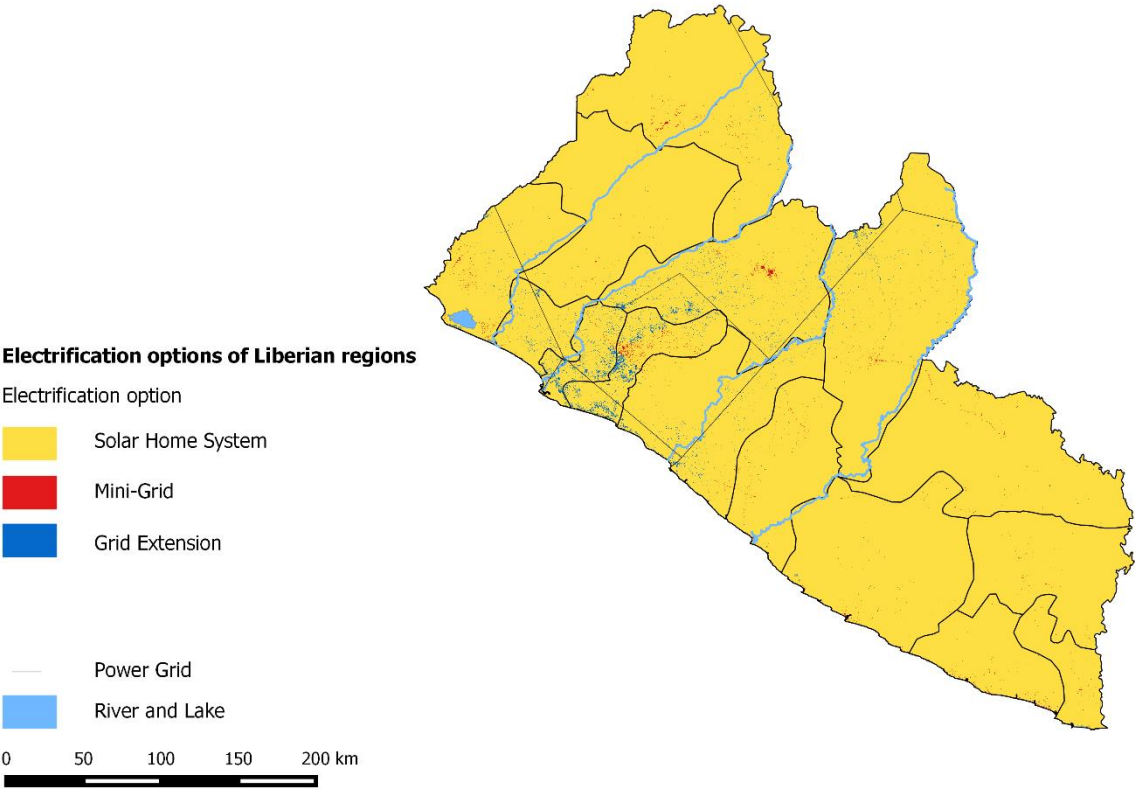

# Electrification option: GridPlanned-GridDom

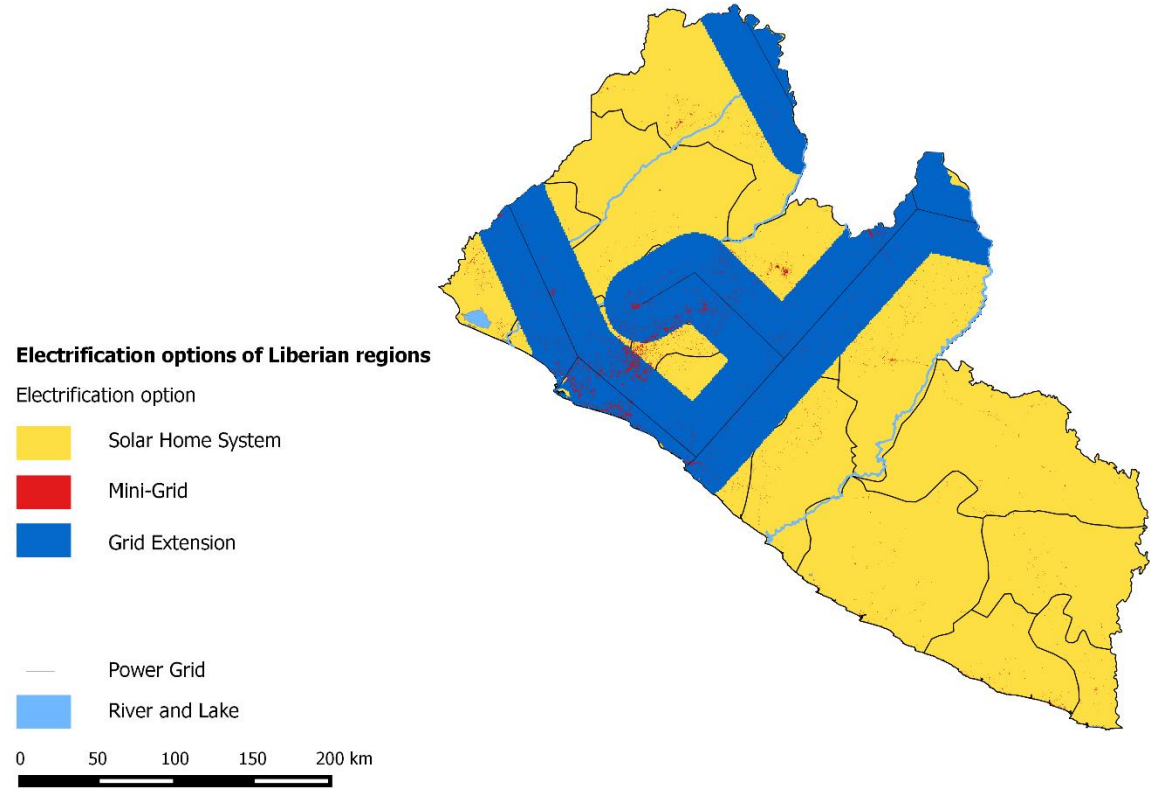

Share of electrification options in all Liberian regions

SHS (%) Mini-Grid (%) Grid (%)

GridPlanned-GridDom

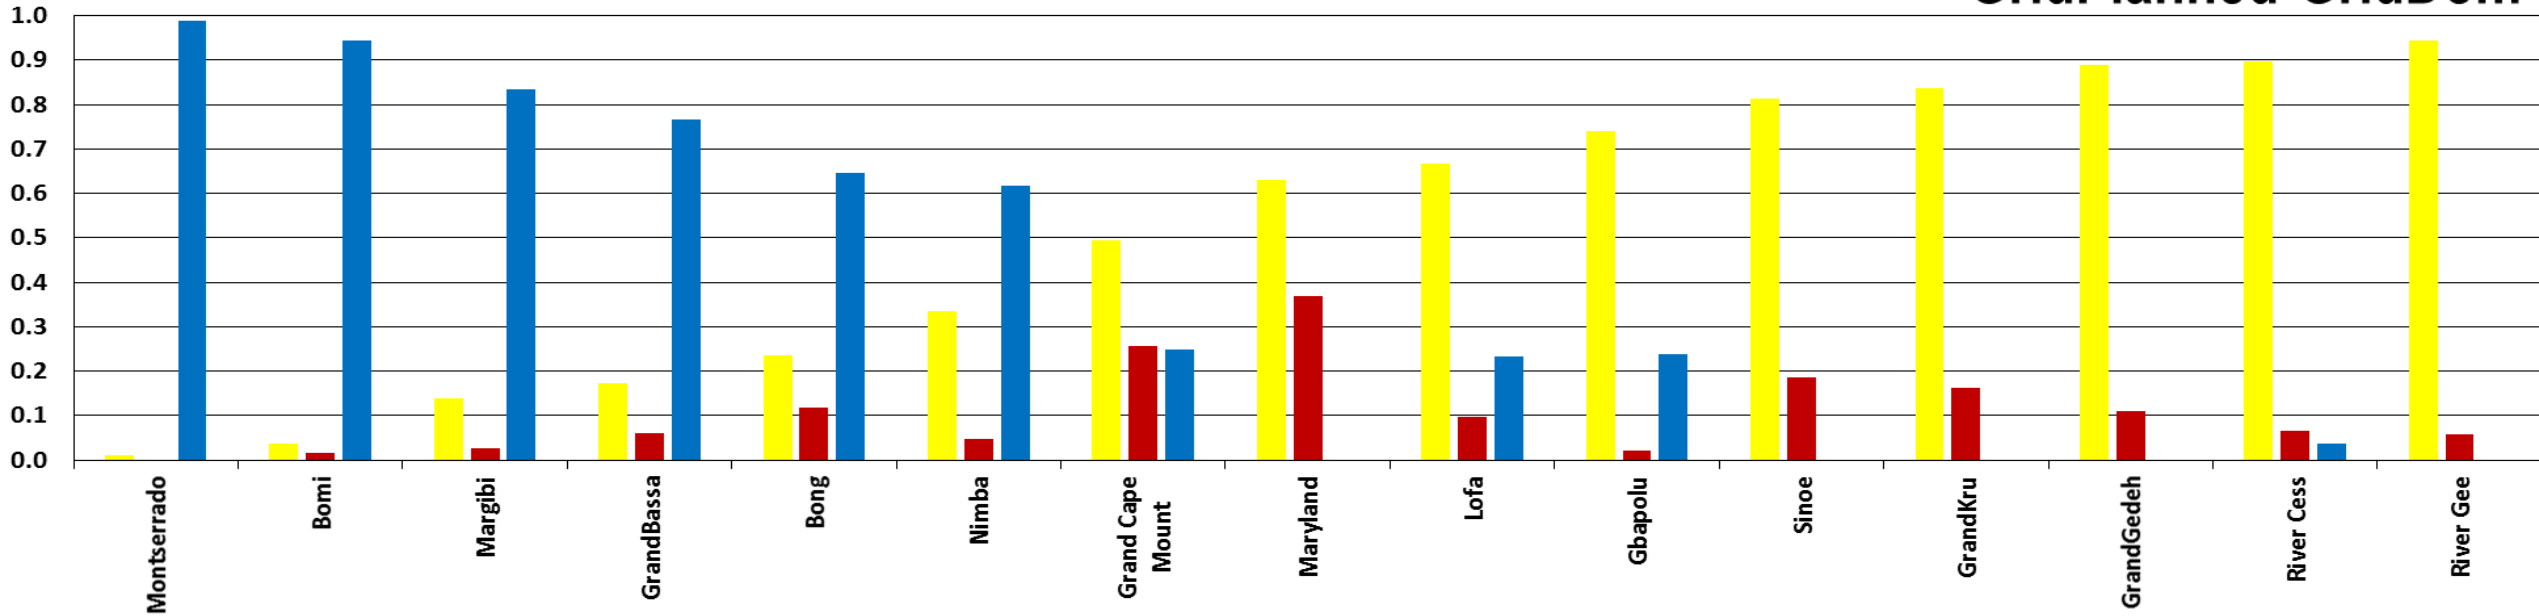

Share of electrification options in all Liberian regions

SHS (%) Mini-Grid (%) Grid (%)

GridPlanned-SHSDom

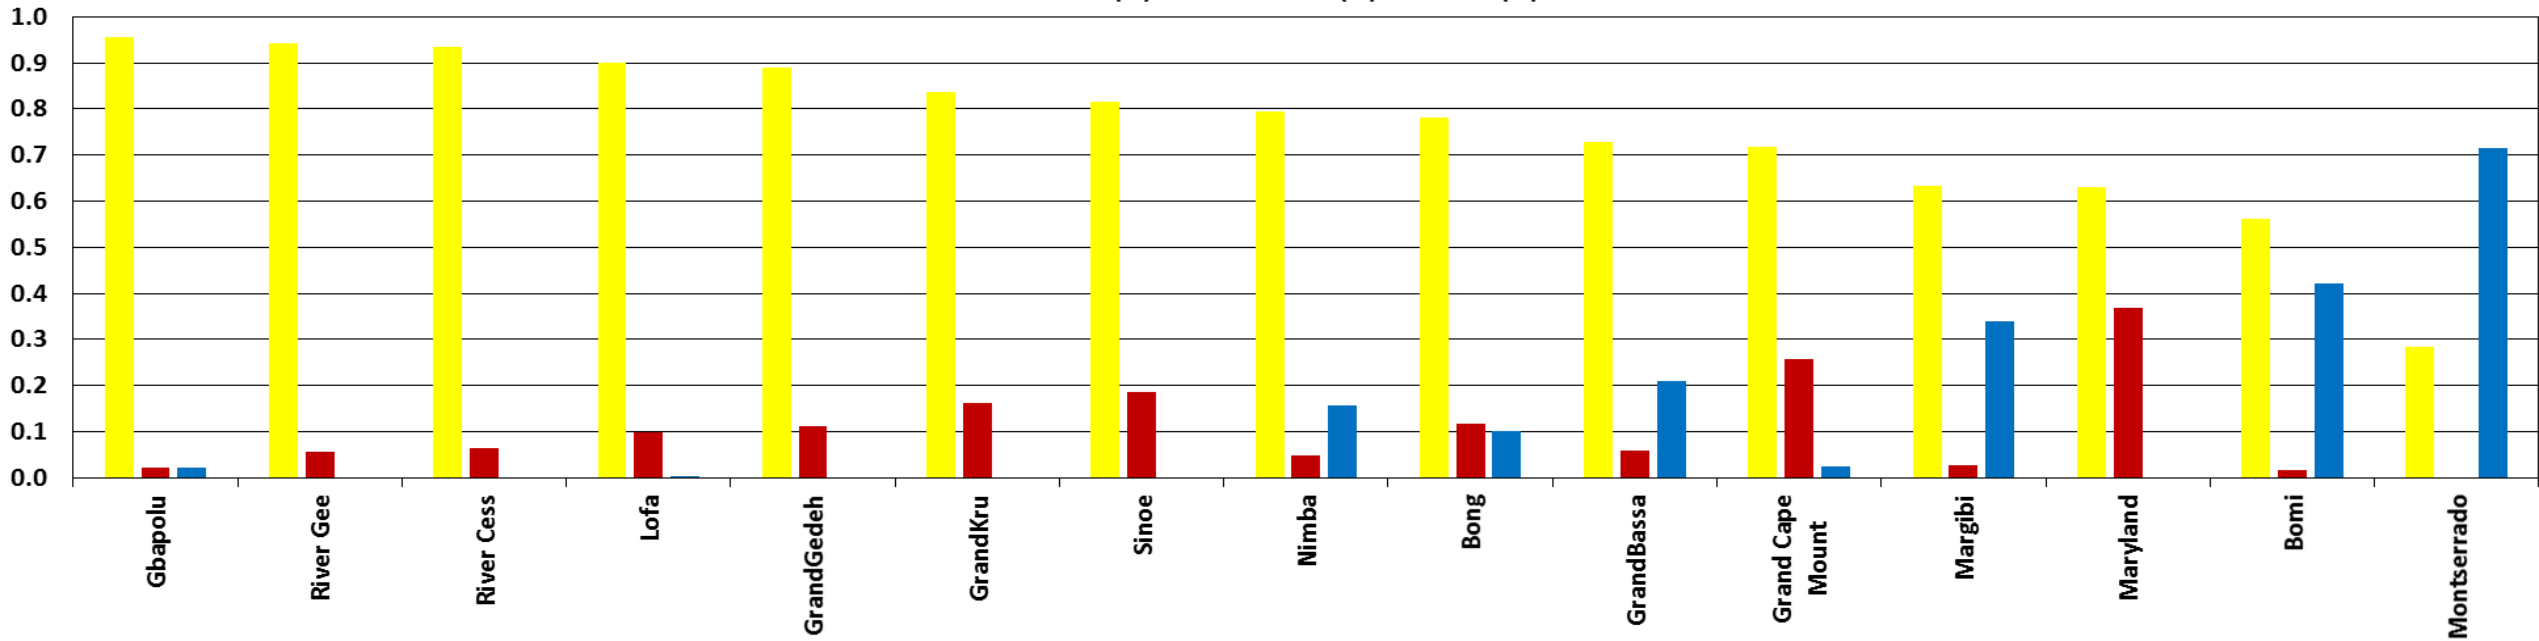

# Mali

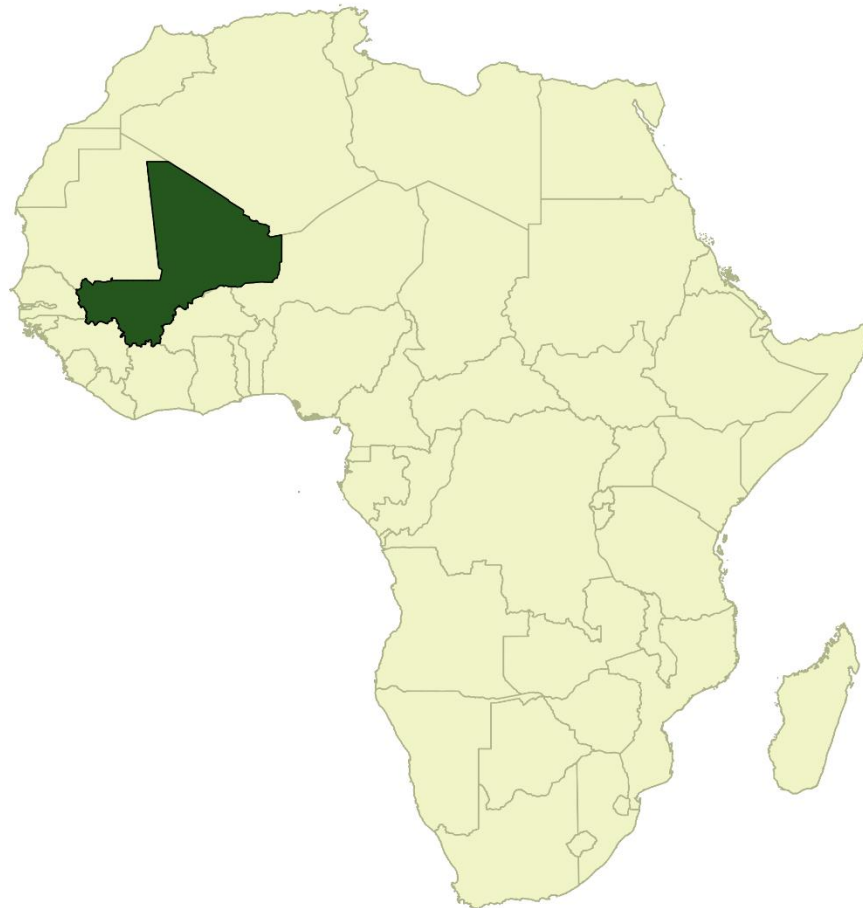

# Night light emission and Population of Malian regions

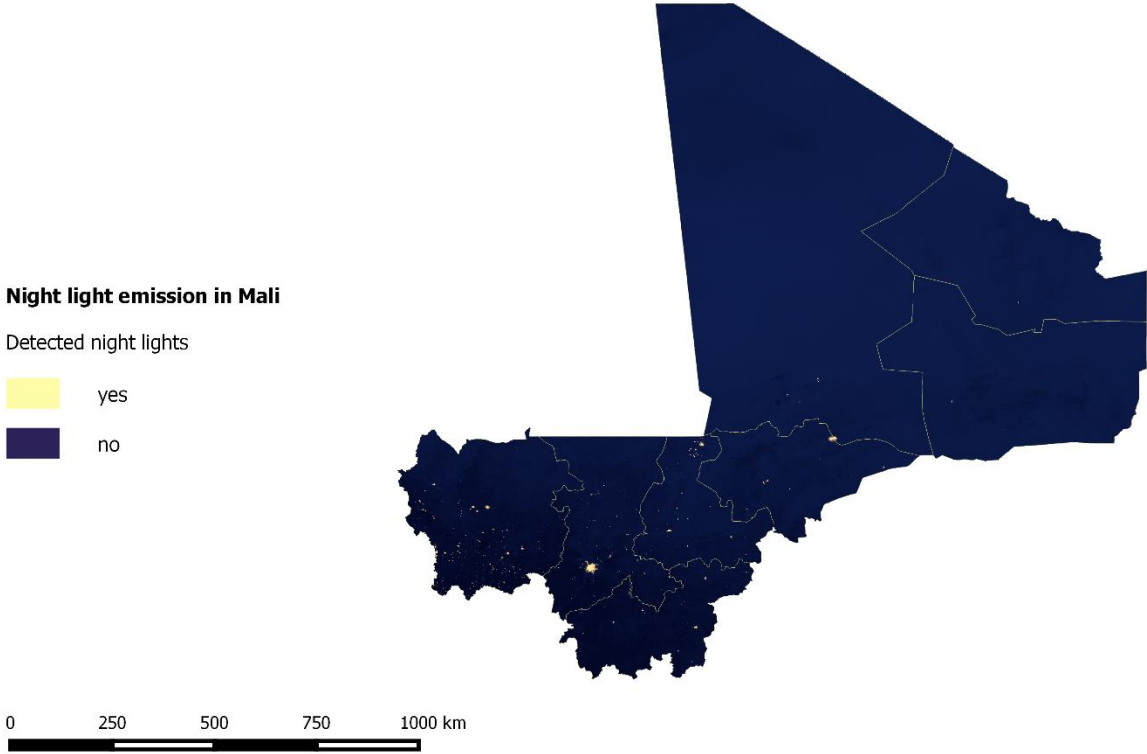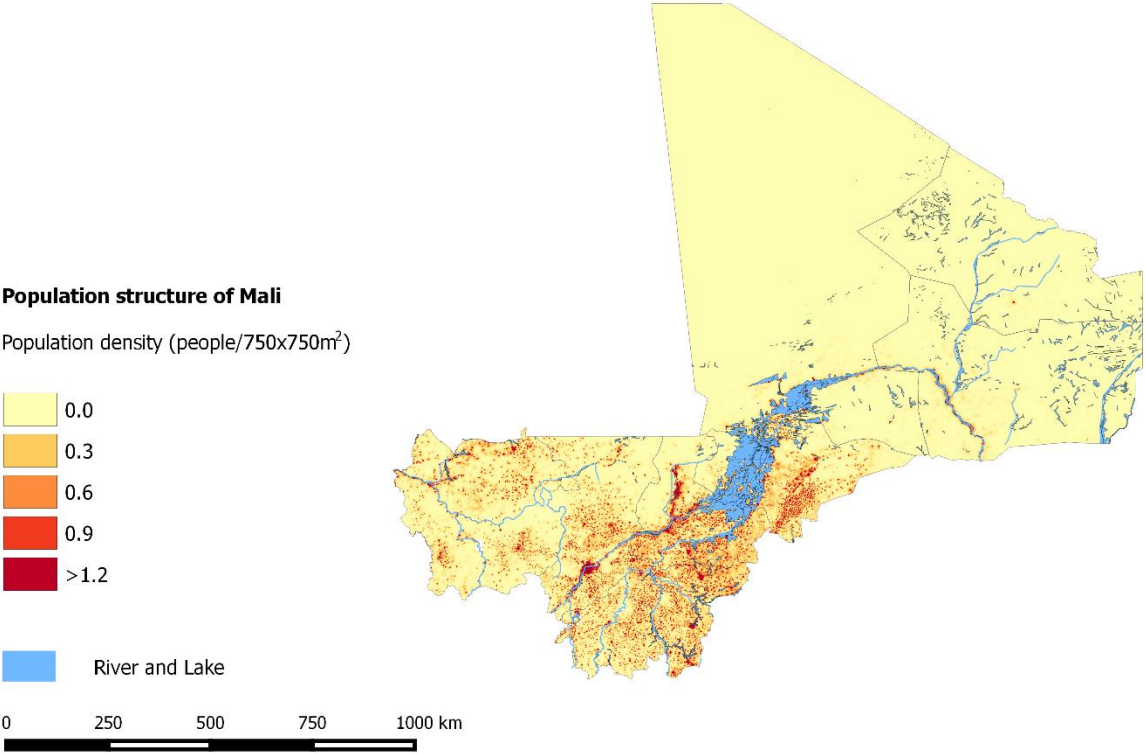

# Electrification option in all Malian regions: GridBuilt-GridDom

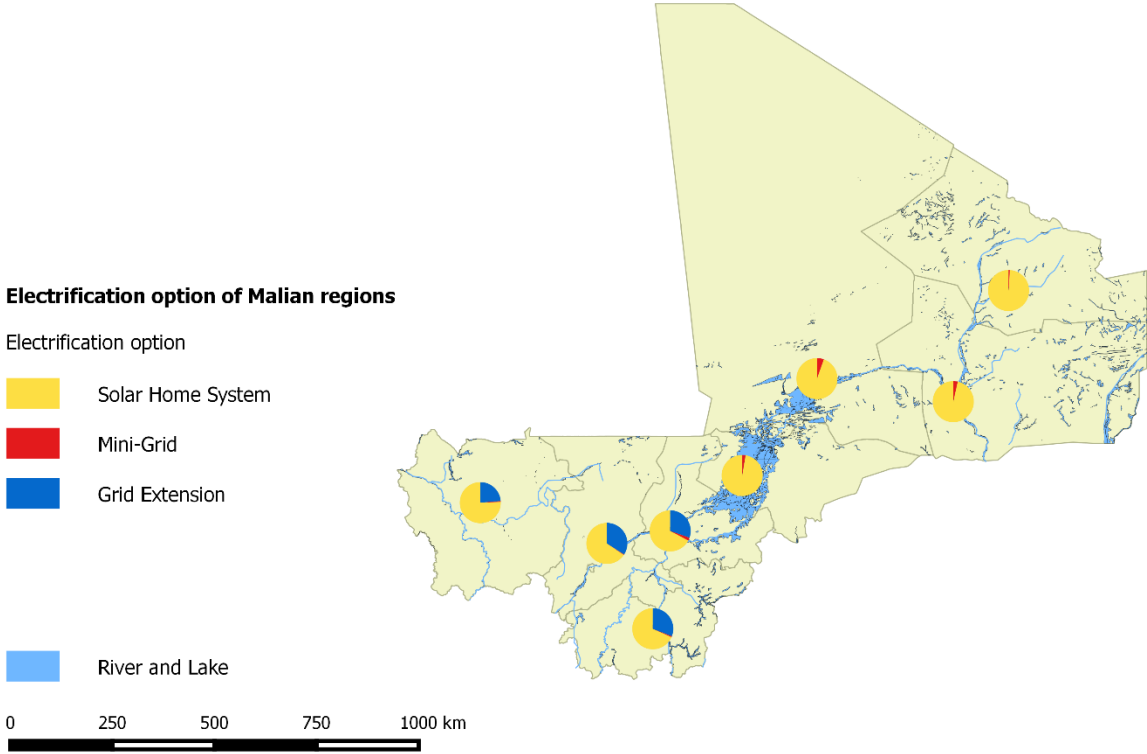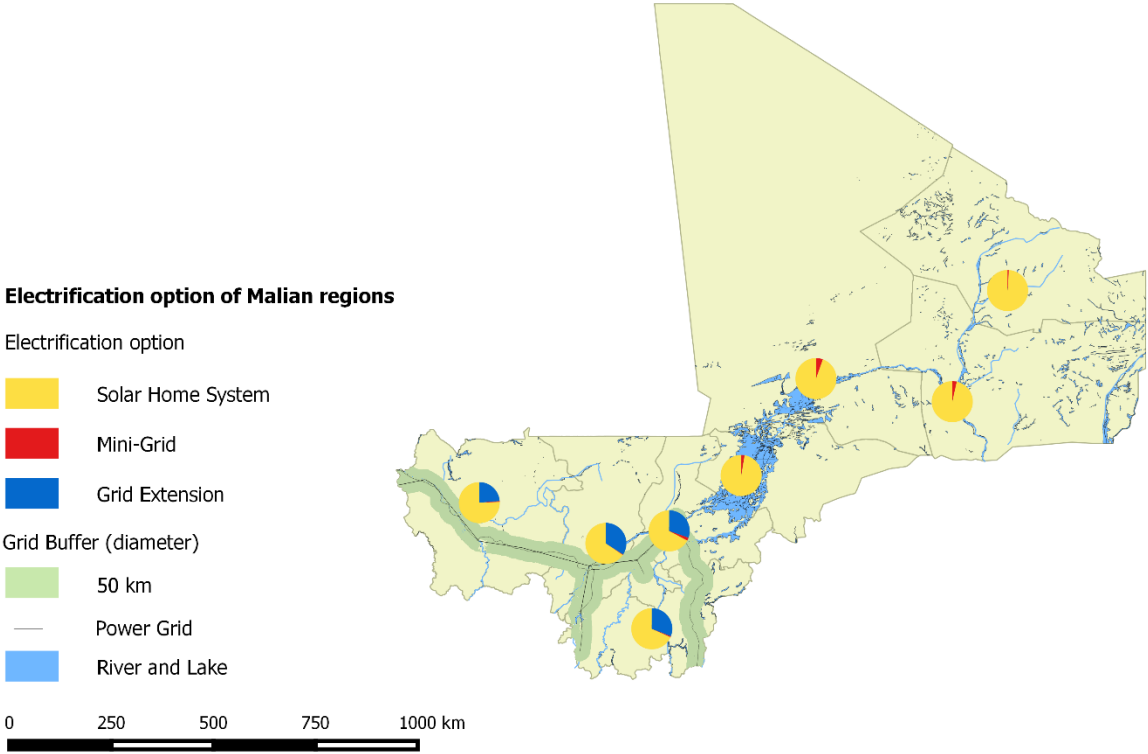

# Electrification option in all Malian regions: GridBuilt-SHSDom

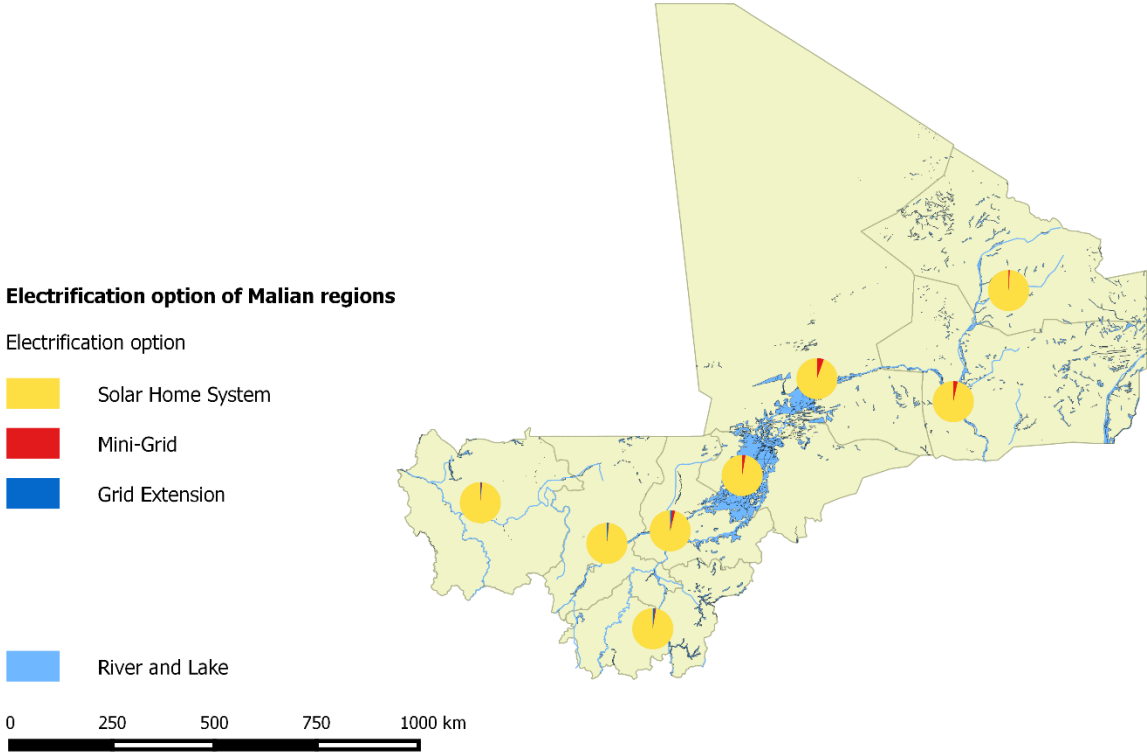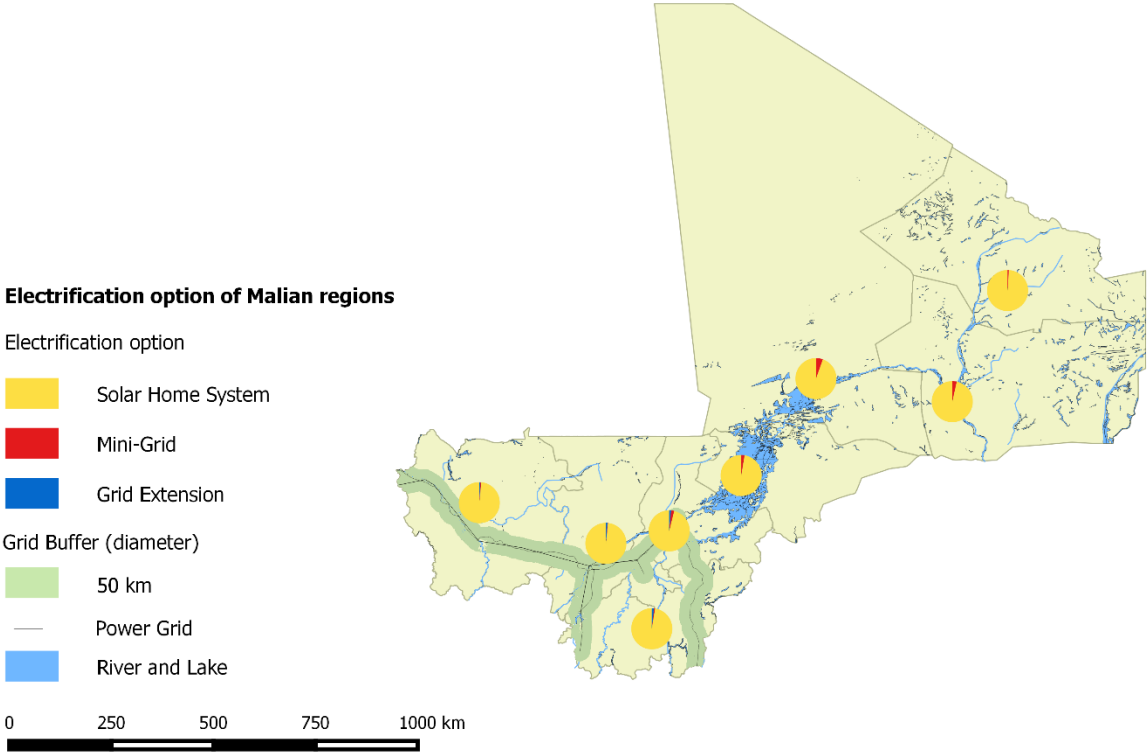

# Electrification option: GridBuilt-SHSDom

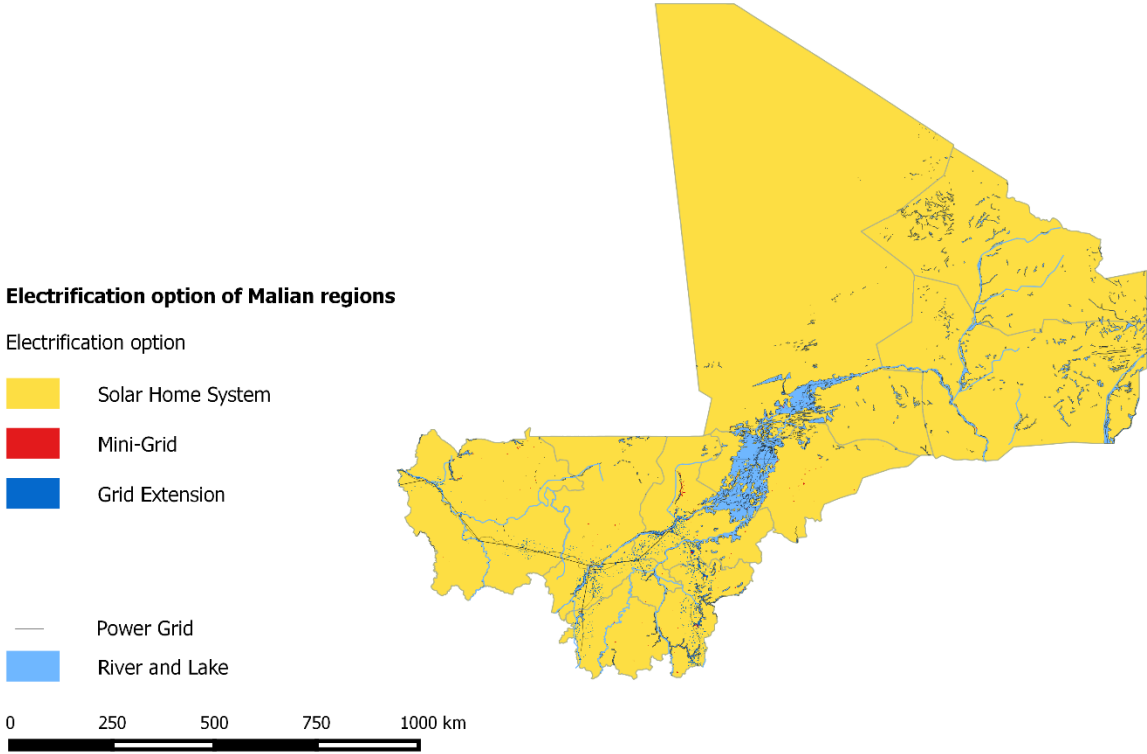

# Electrification option: GridBuilt-GridDom

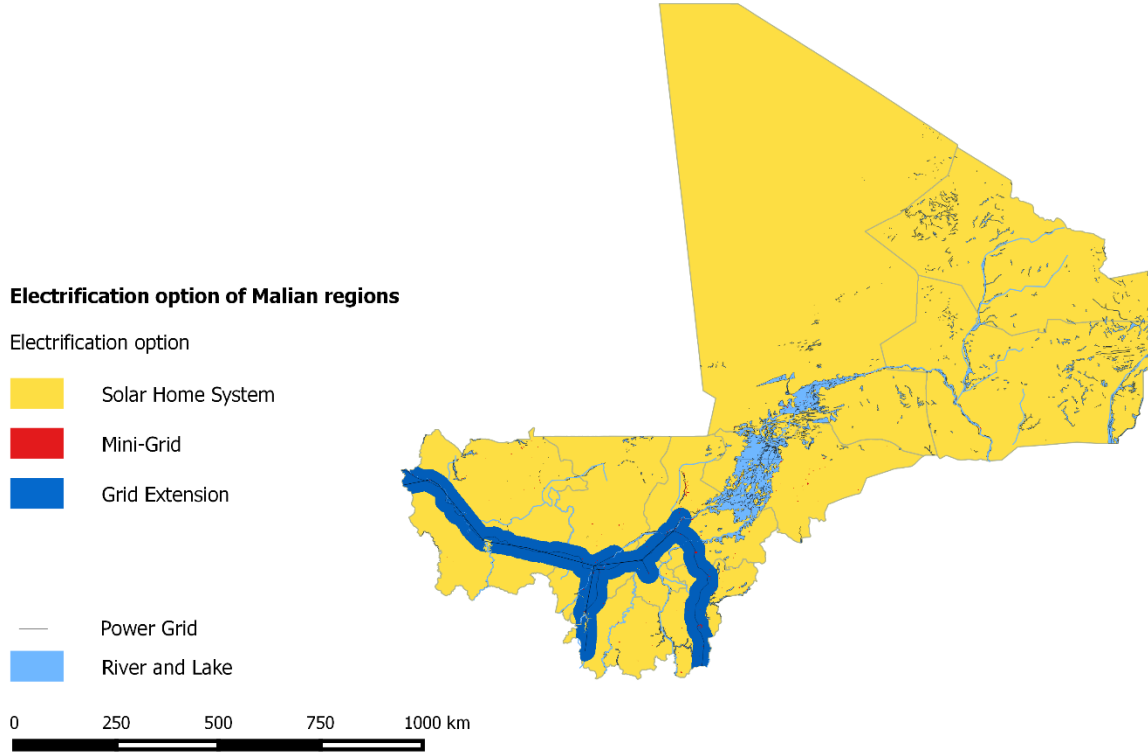

Share of electrification options in all Malian regions

GridBuilt-GridDom

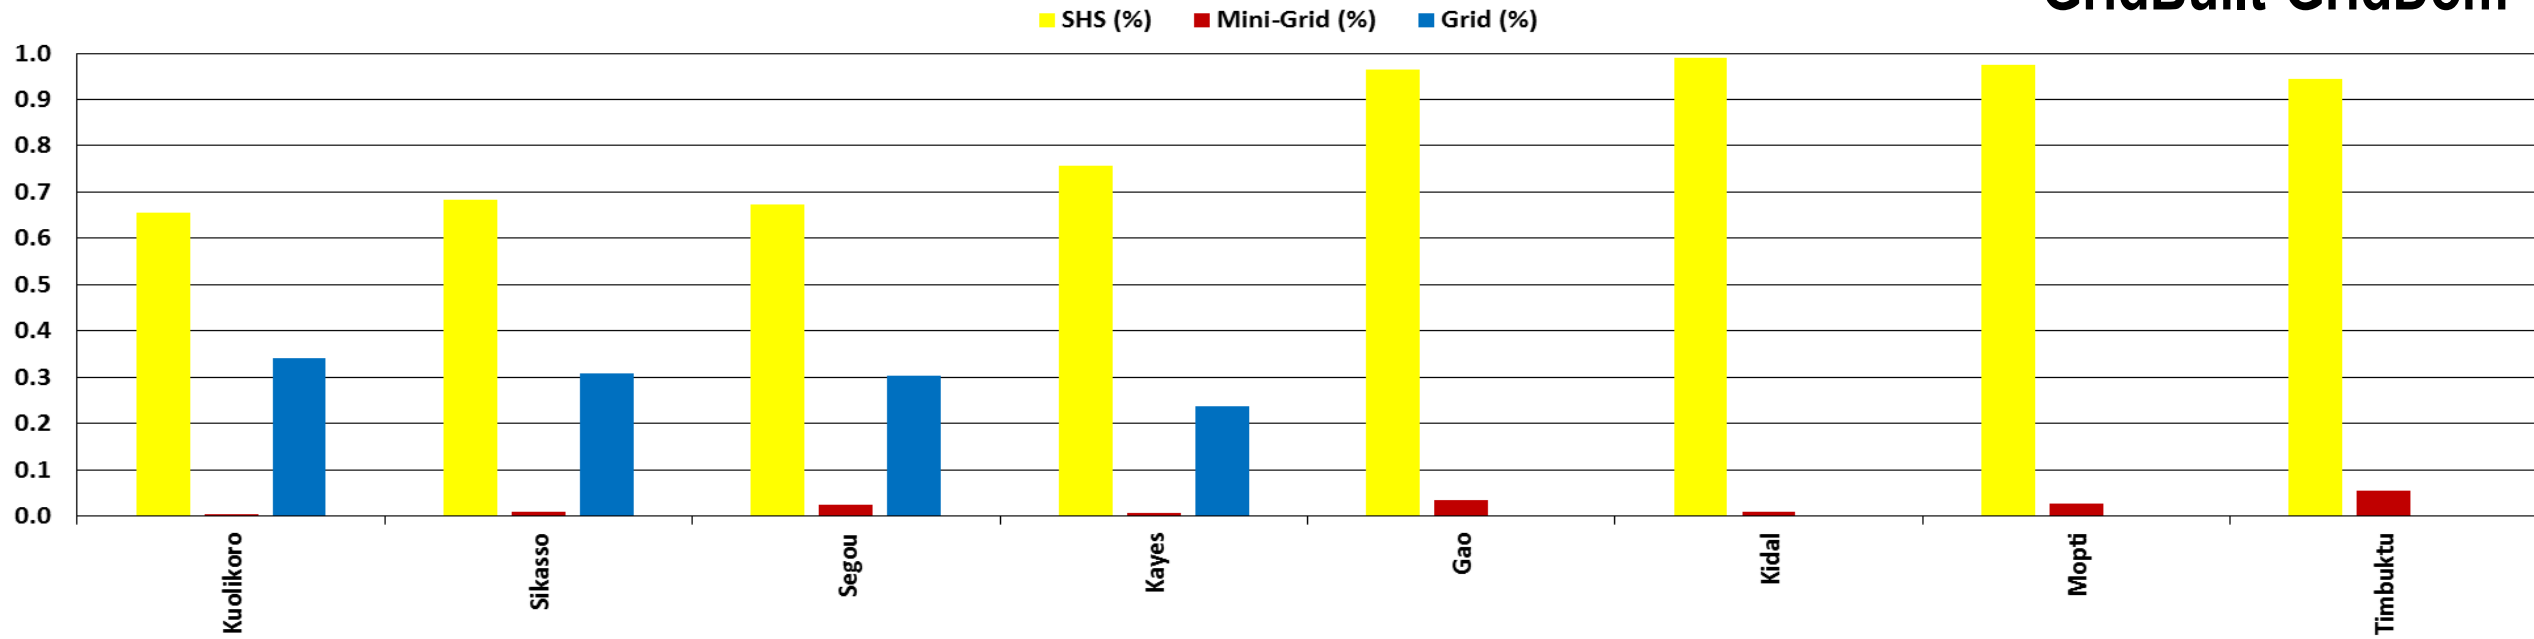

Share of electrification options in all Malian regions

GridBuilt-SHSDom

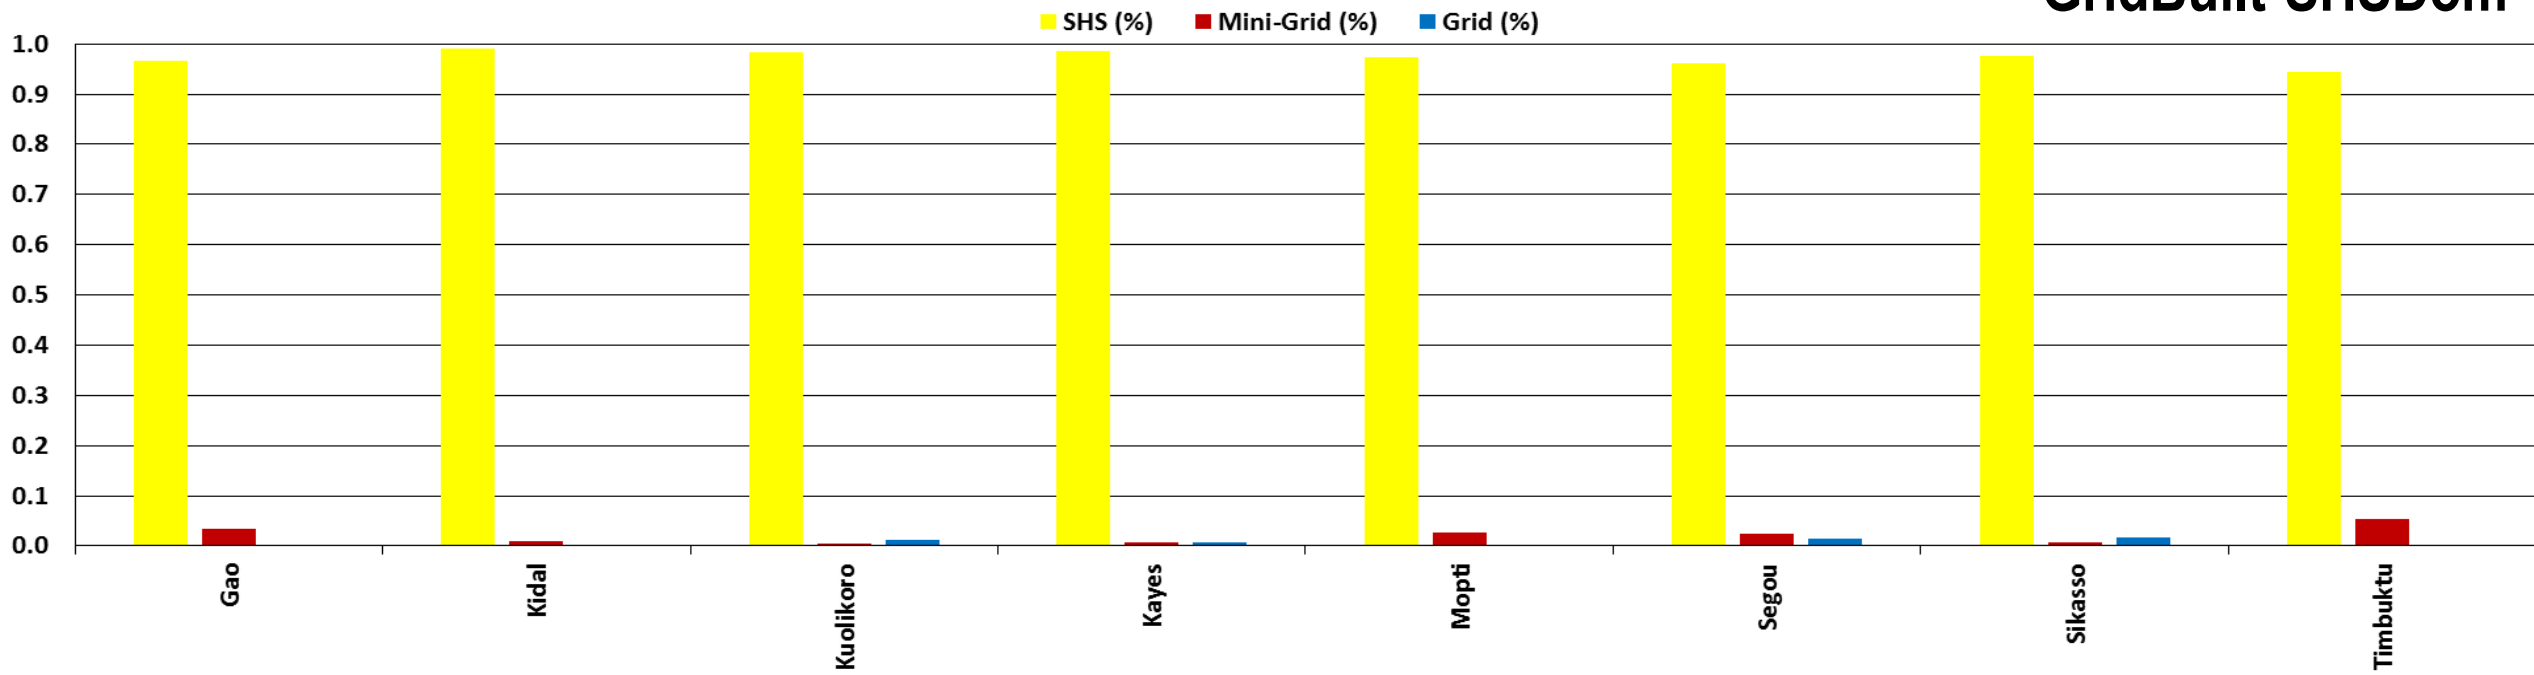

# Electrification option in all Malian regions: GridPlanned-GridDom

## Electrification option of Malian regions

Electrification option

- Solar Home System
- Mini-Grid
- Grid Extension

River and Lake

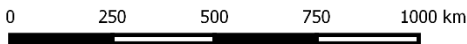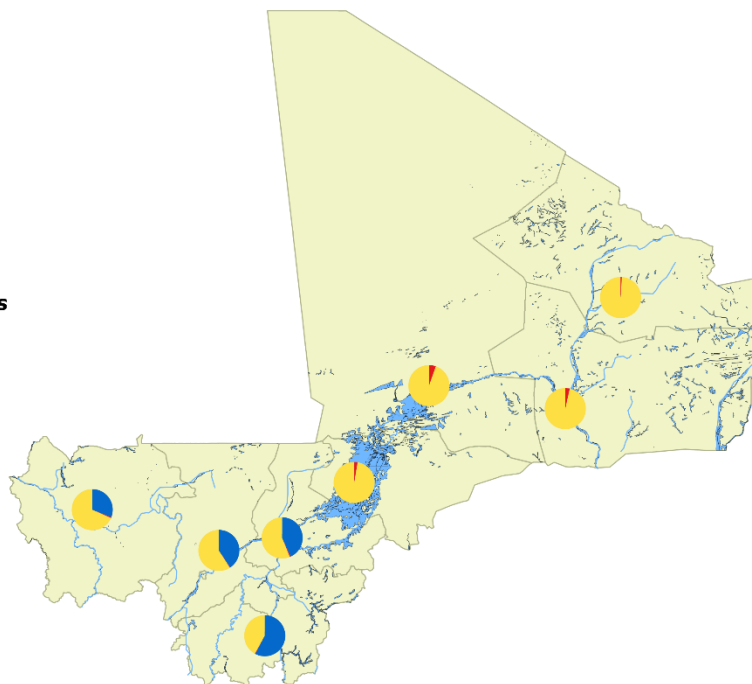

## Electrification option of Malian regions

Electrification option

- Solar Home System
- Mini-Grid
- Grid Extension

Grid Buffer (diameter)

- 50 km
- Power Grid
- River and Lake

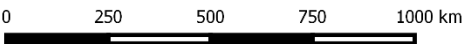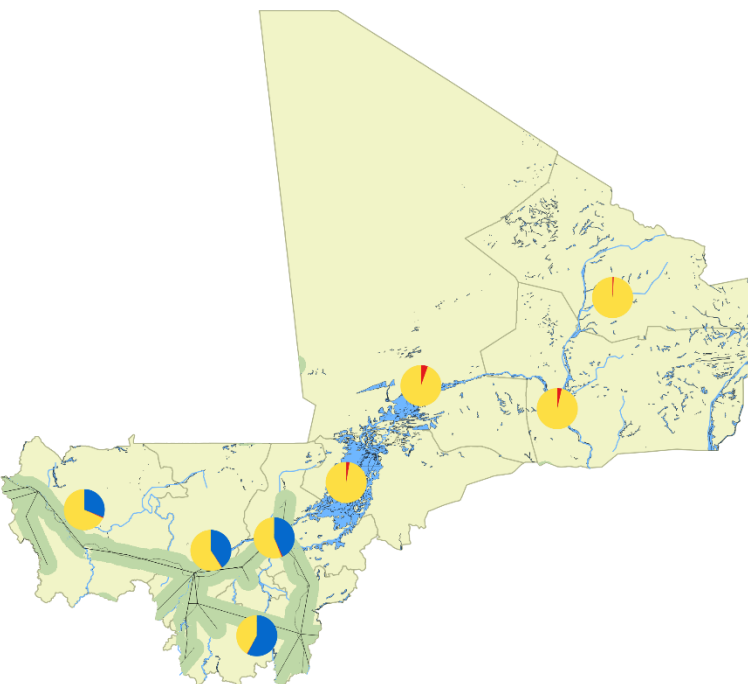

# Electrification option in all Malian regions: GridPlanned-SHSDom

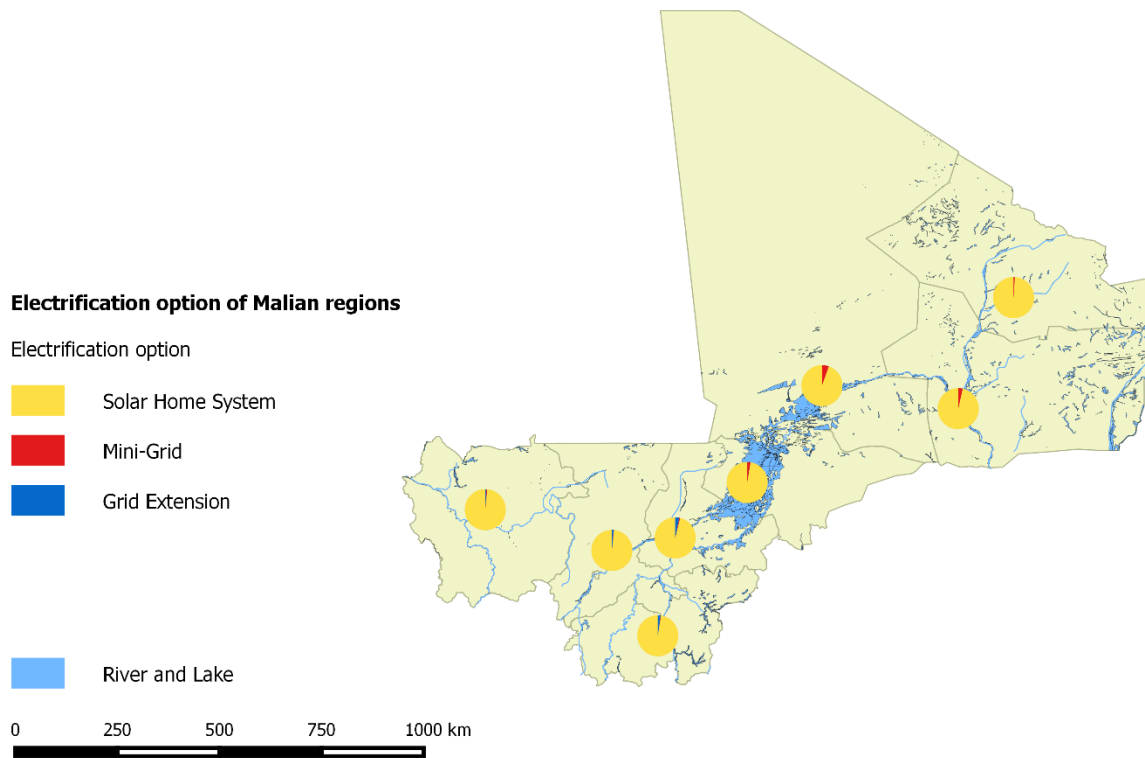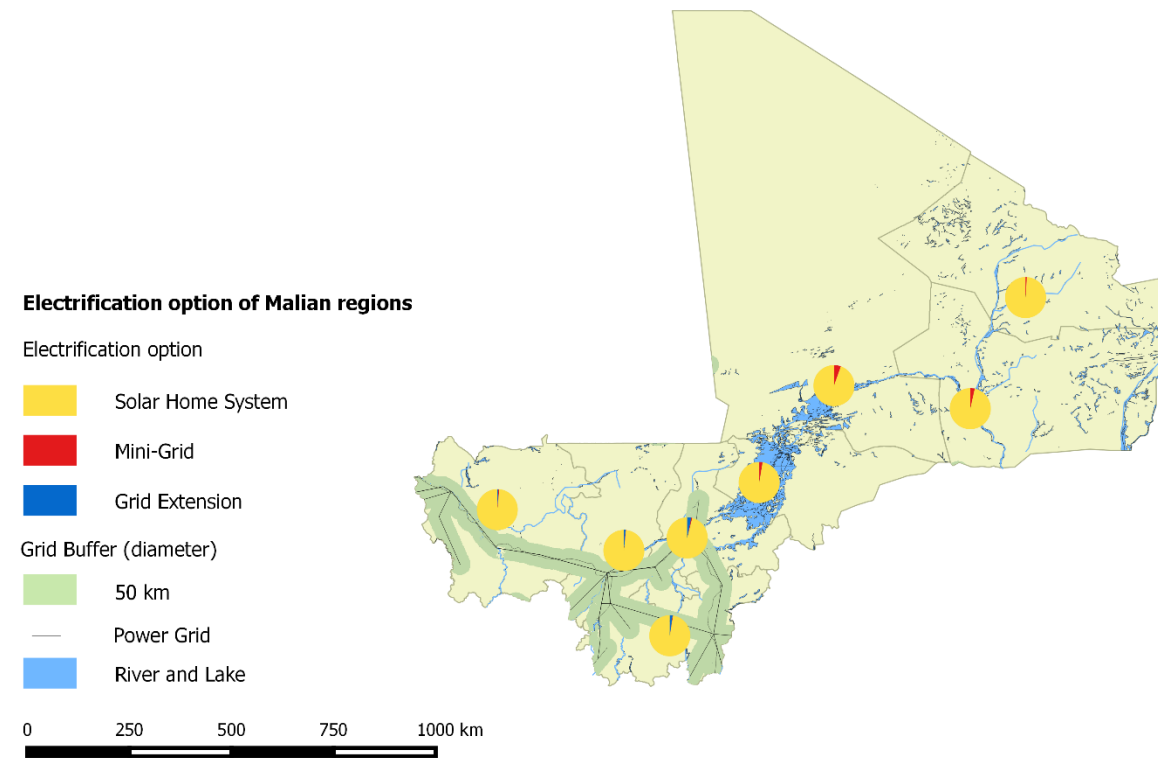

# Electrification option: GridPlanned-SHSDom

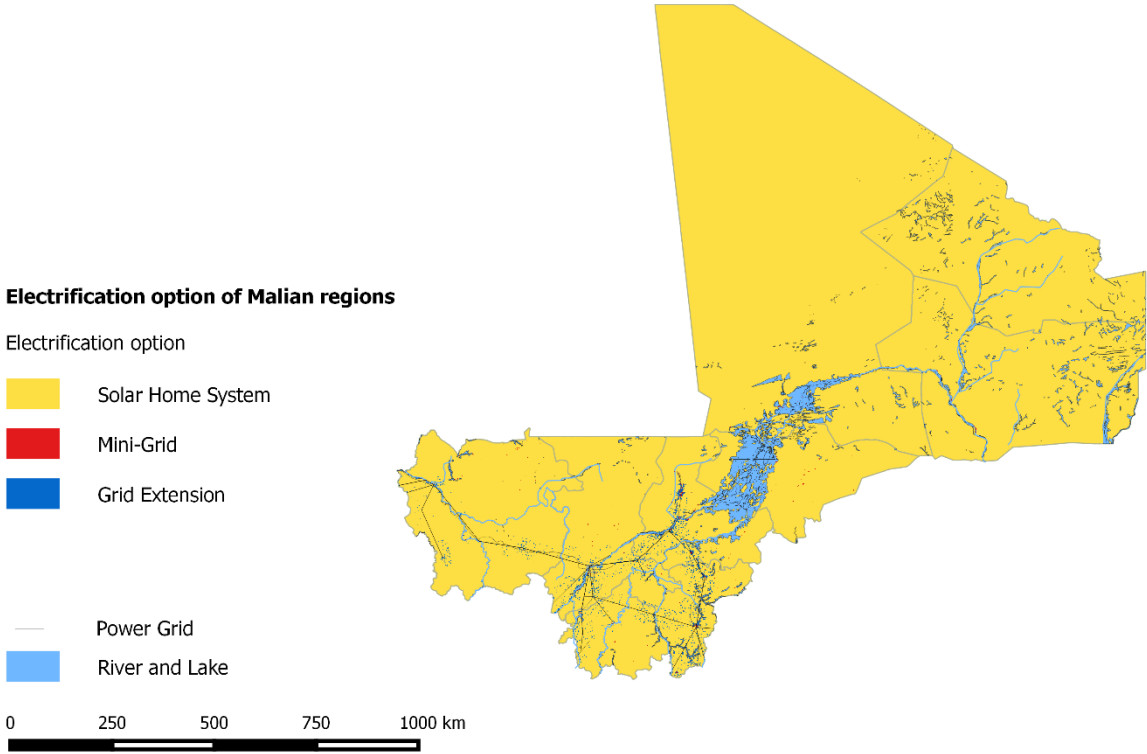

# Electrification option: GridPlanned-GridDom

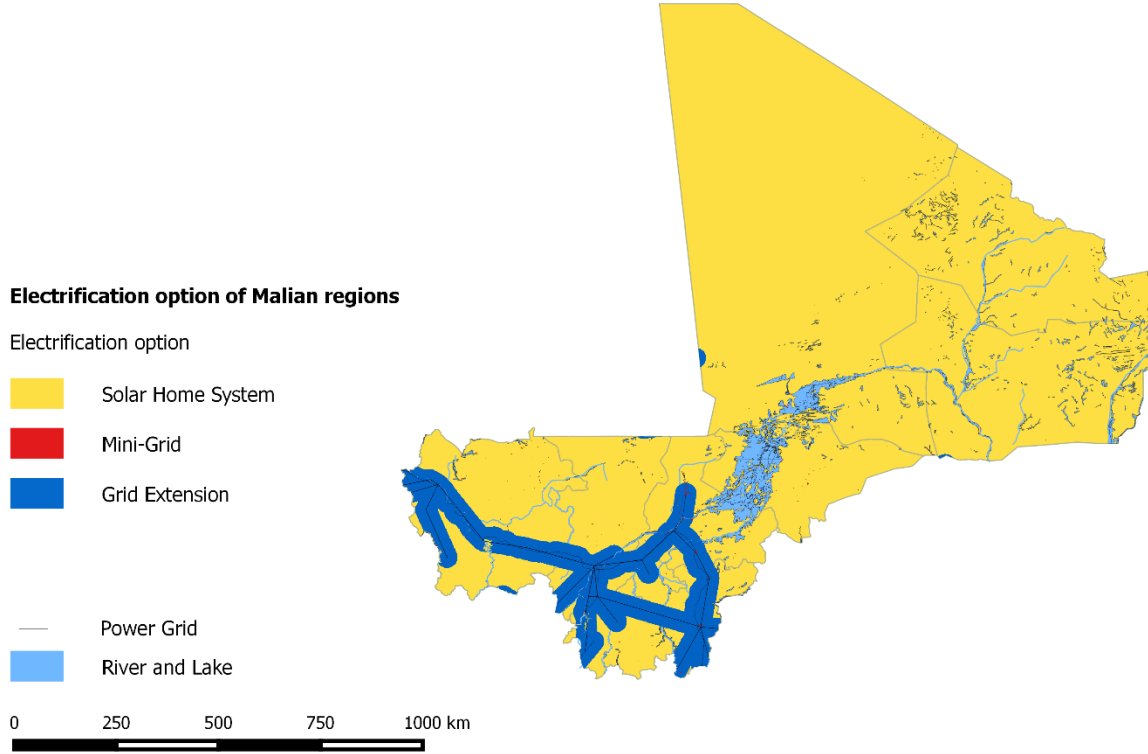

Share of electrification options in all Malian regions

GridPlanned-GridDom

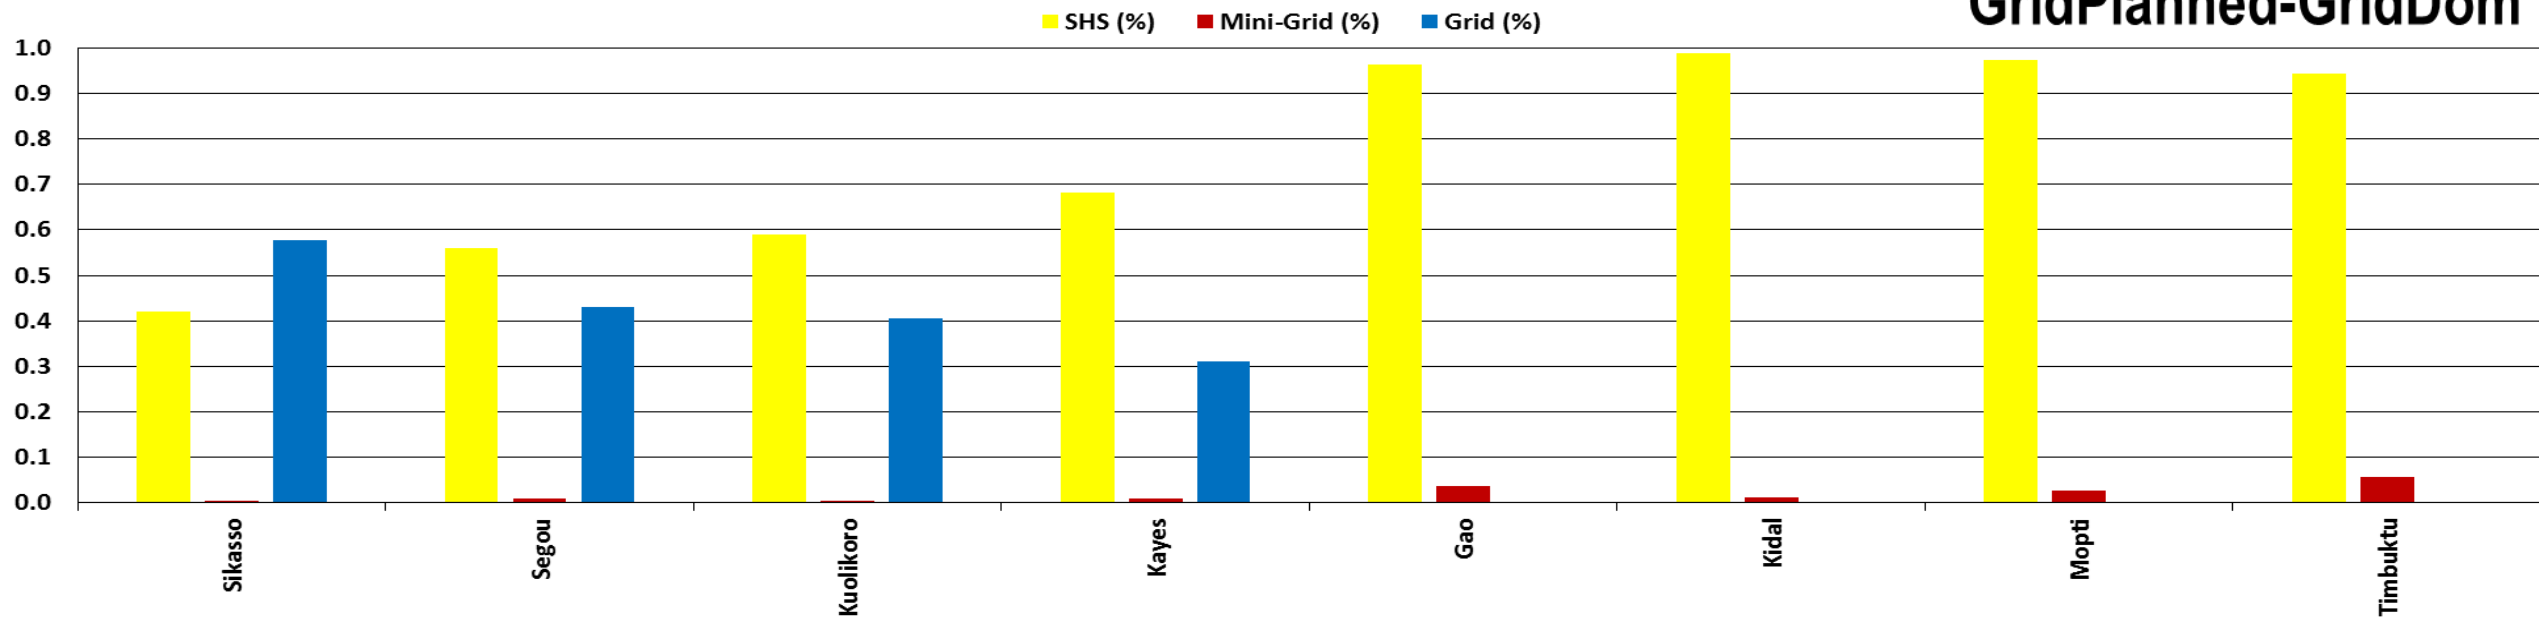

Share of electrification options in all Malian regions

GridPlanned-SHSDom

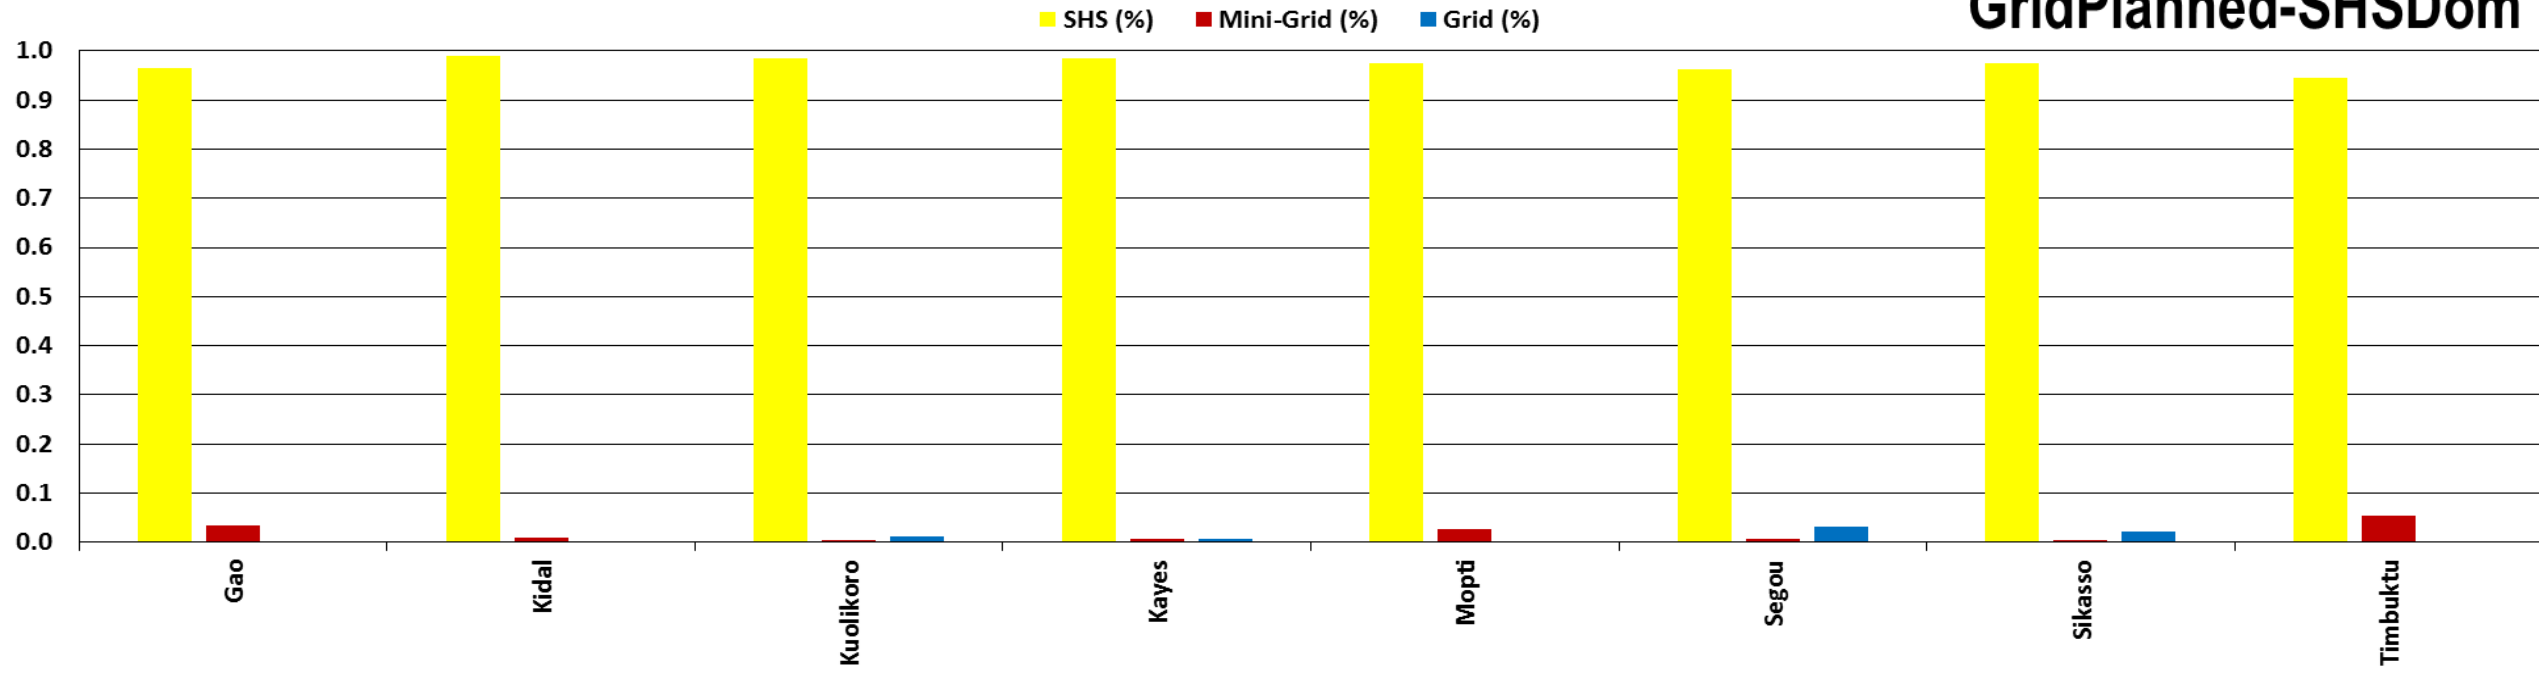

# Mauritania

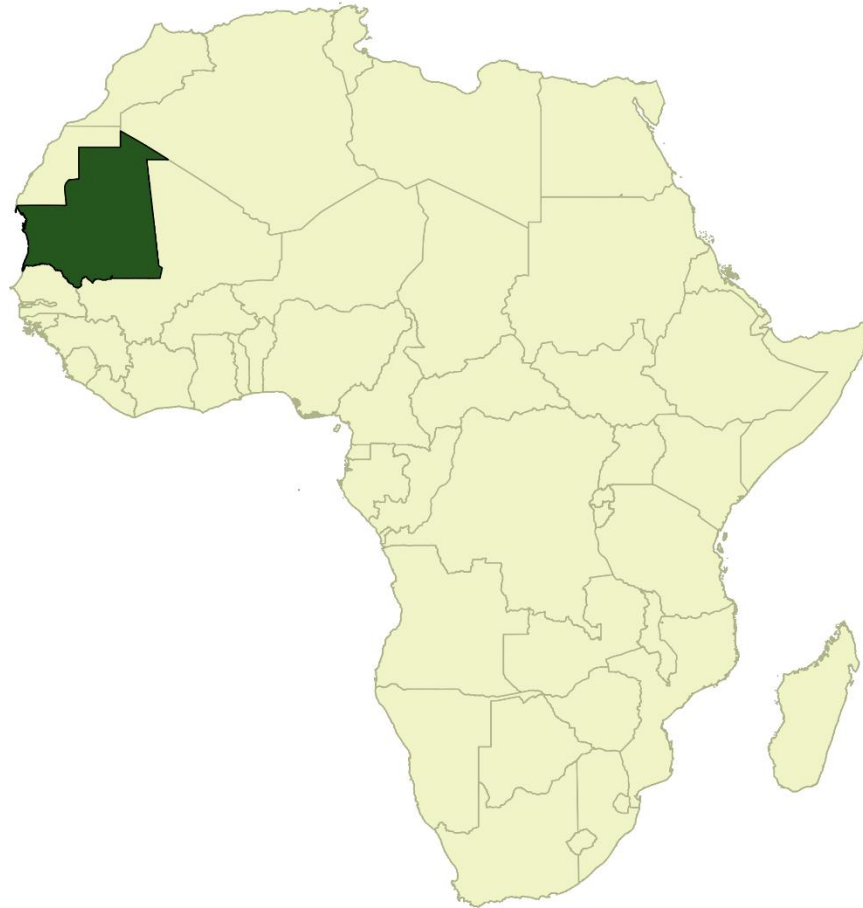

# Night light emission and Population of Mauritanian regions

Night light emission in Mauritania

Detected night lights

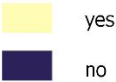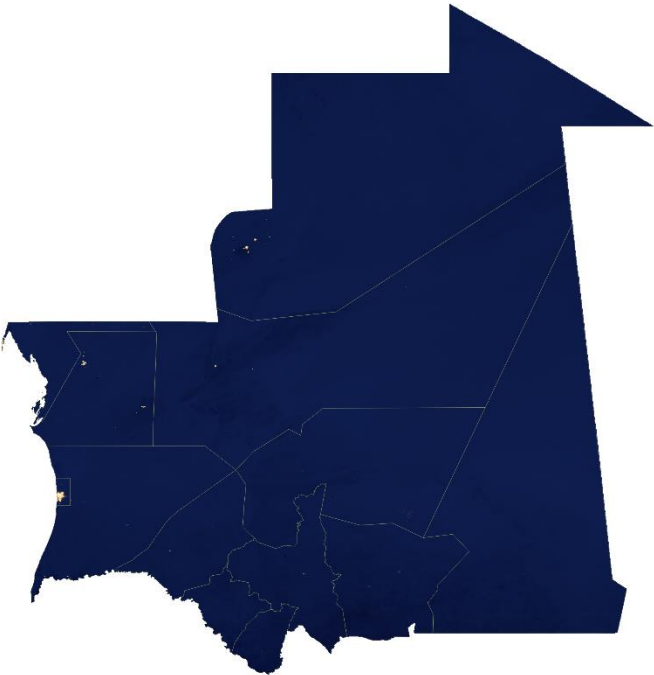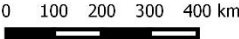

Populationstructure of Mauritania

Population density (people/750x750m<sup>2</sup>)

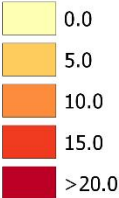

River and Lake

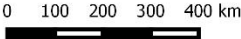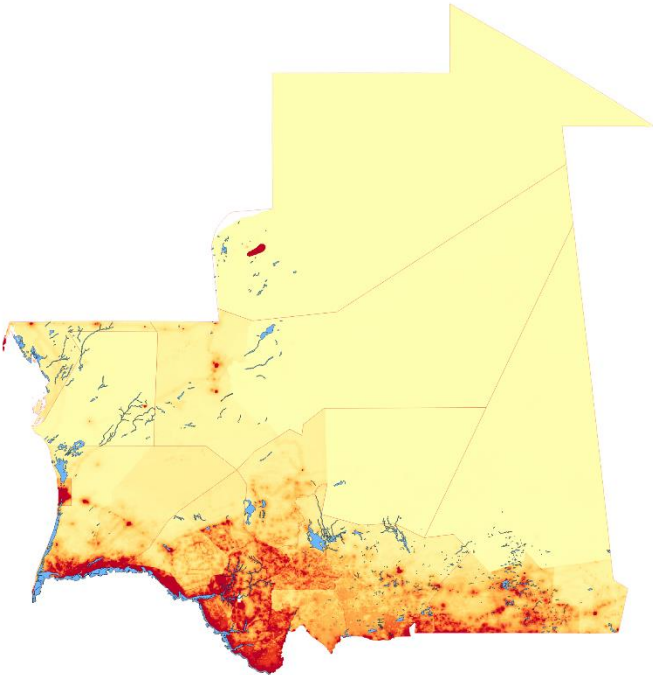

# Electrification option in all Mauritanian regions: GridBuilt-GridDom

## Electrification options of Mauritanian regions

Electrification option

-  Solar Home System
-  Mini-Grid
-  Grid Extension

 River and Lake

0 100 200 300 400 km

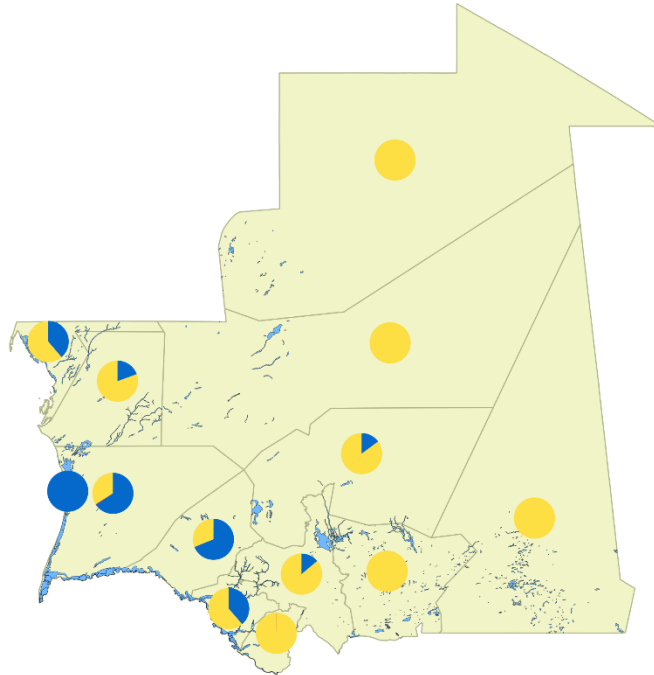

## Electrification options of Mauritanian regions

Electrification option

-  Solar Home System
-  Mini-Grid
-  Grid Extension

Grid Buffer (diameter)

-  50 km
-  Power Grid
-  River and Lake

0 100 200 300 400 km

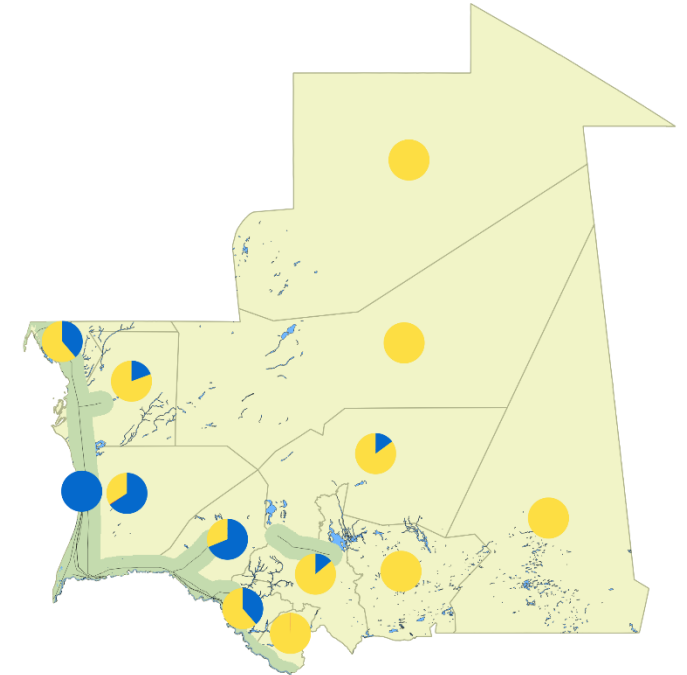

# Electrification option in all Mauritanian regions: GridBuilt-SHSDom

## Electrification options of Mauritanian regions

Electrification option

- Solar Home System
- Mini-Grid
- Grid Extension

■ River and Lake

0 100 200 300 400 km

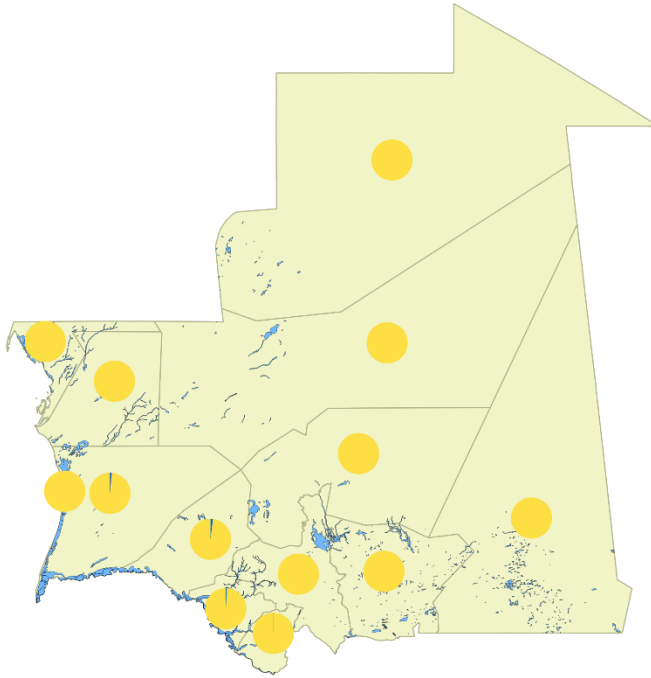

## Electrification options of Mauritanian regions

Electrification option

- Solar Home System
- Mini-Grid
- Grid Extension

Grid Buffer (diameter)

- 50 km
- Power Grid
- River and Lake

0 100 200 300 400 km

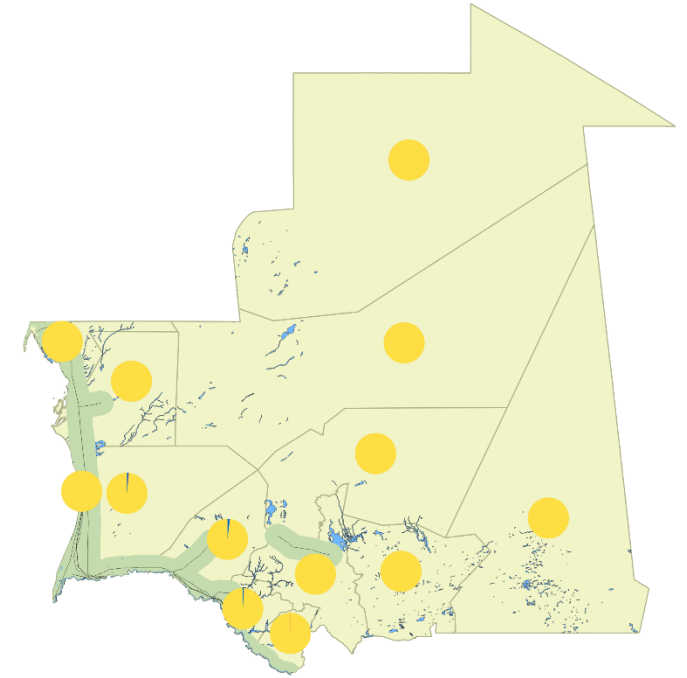

# Electrification option: GridBuilt-SHSDom

## Electrification options of Mauritanian regions

- Electrification option
- Solar Home System
  - Mini-Grid
  - Grid Extension
- Power Grid
- River and Lake

0 100 200 300 400 km

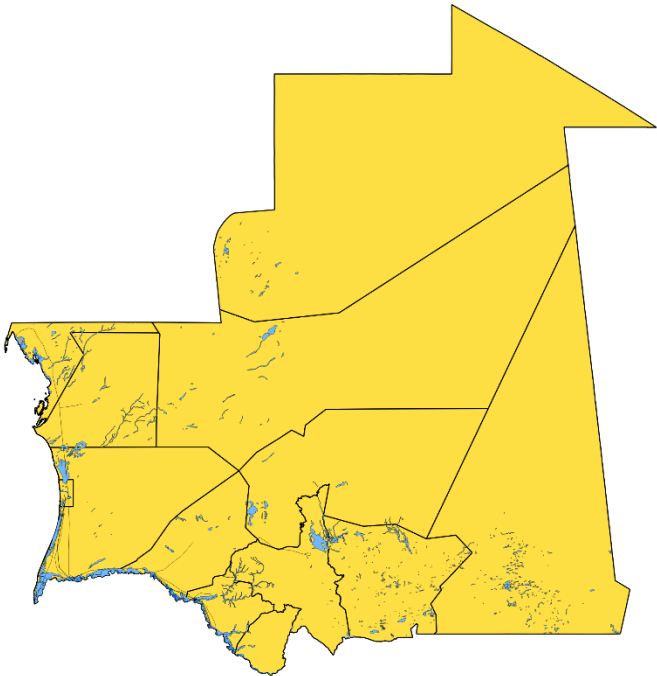

# Electrification option: GridBuilt-GridDom

## Electrification options of Mauritanian regions

- Electrification option
- Solar Home System
  - Mini-Grid
  - Grid Extension
- Power Grid
- River and Lake

0 100 200 300 400 km

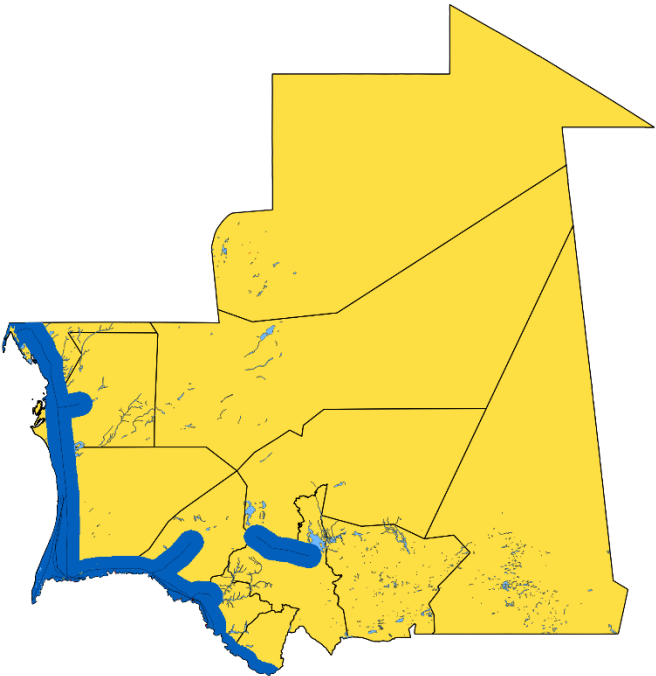

Share of electrification options in all Mauritanian regions

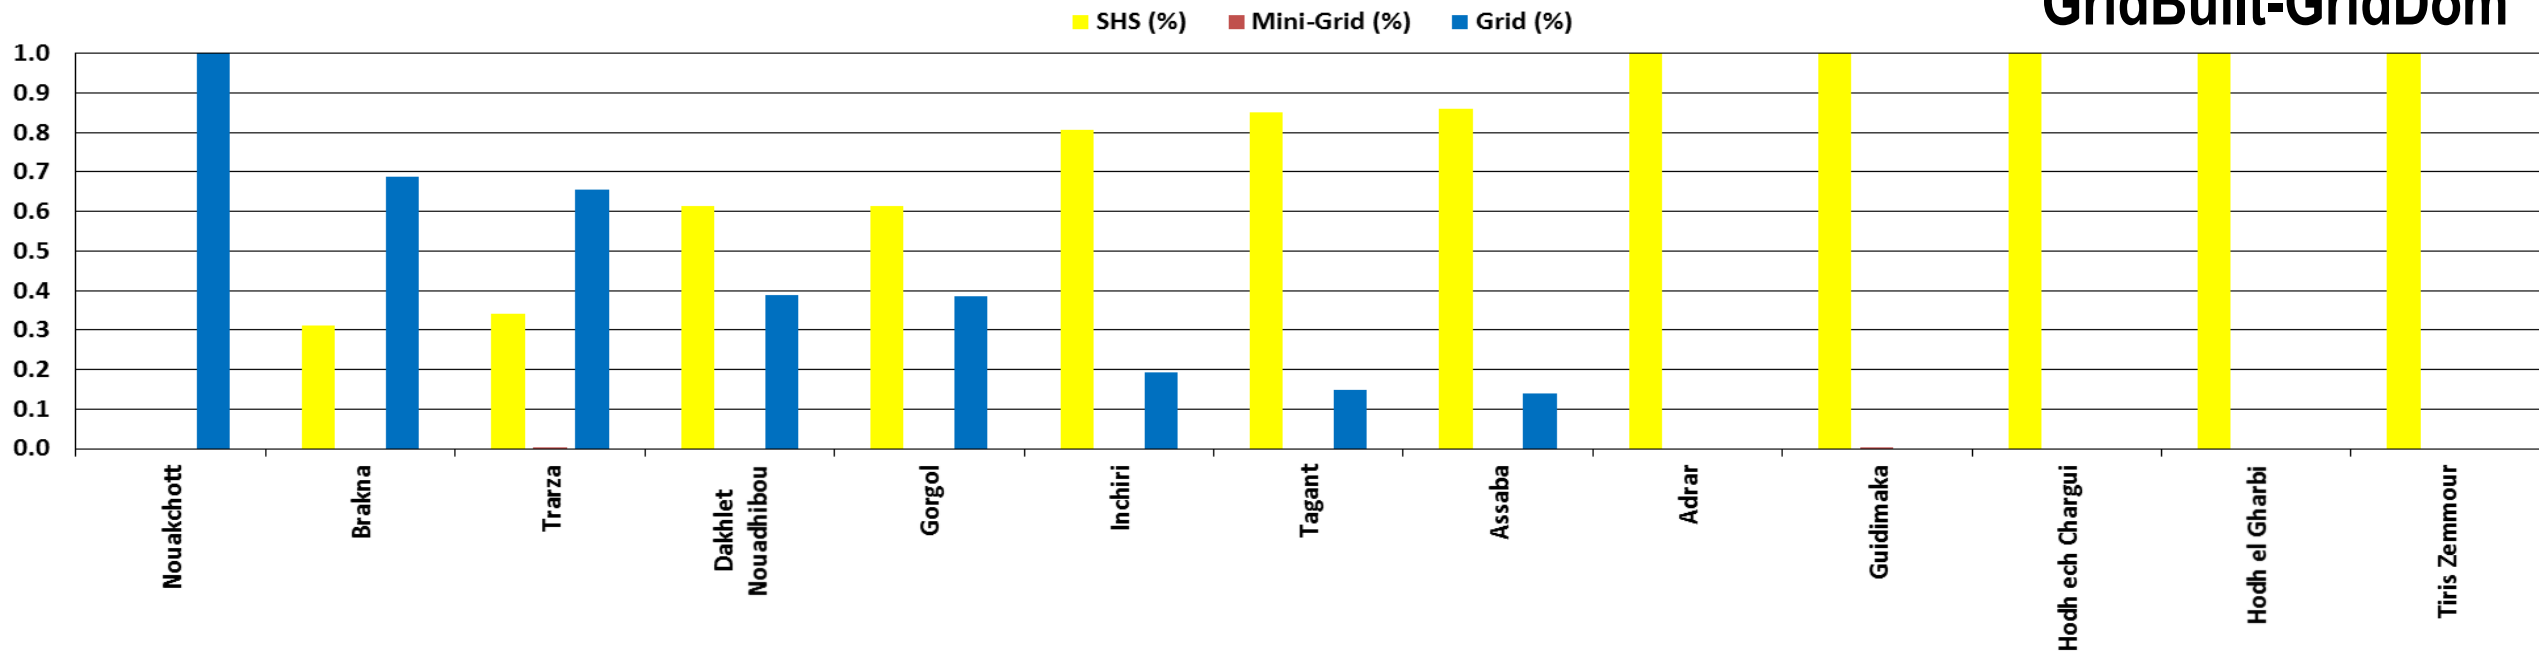

GridBuilt-GridDom

Share of electrification options in all Mauritanian regions

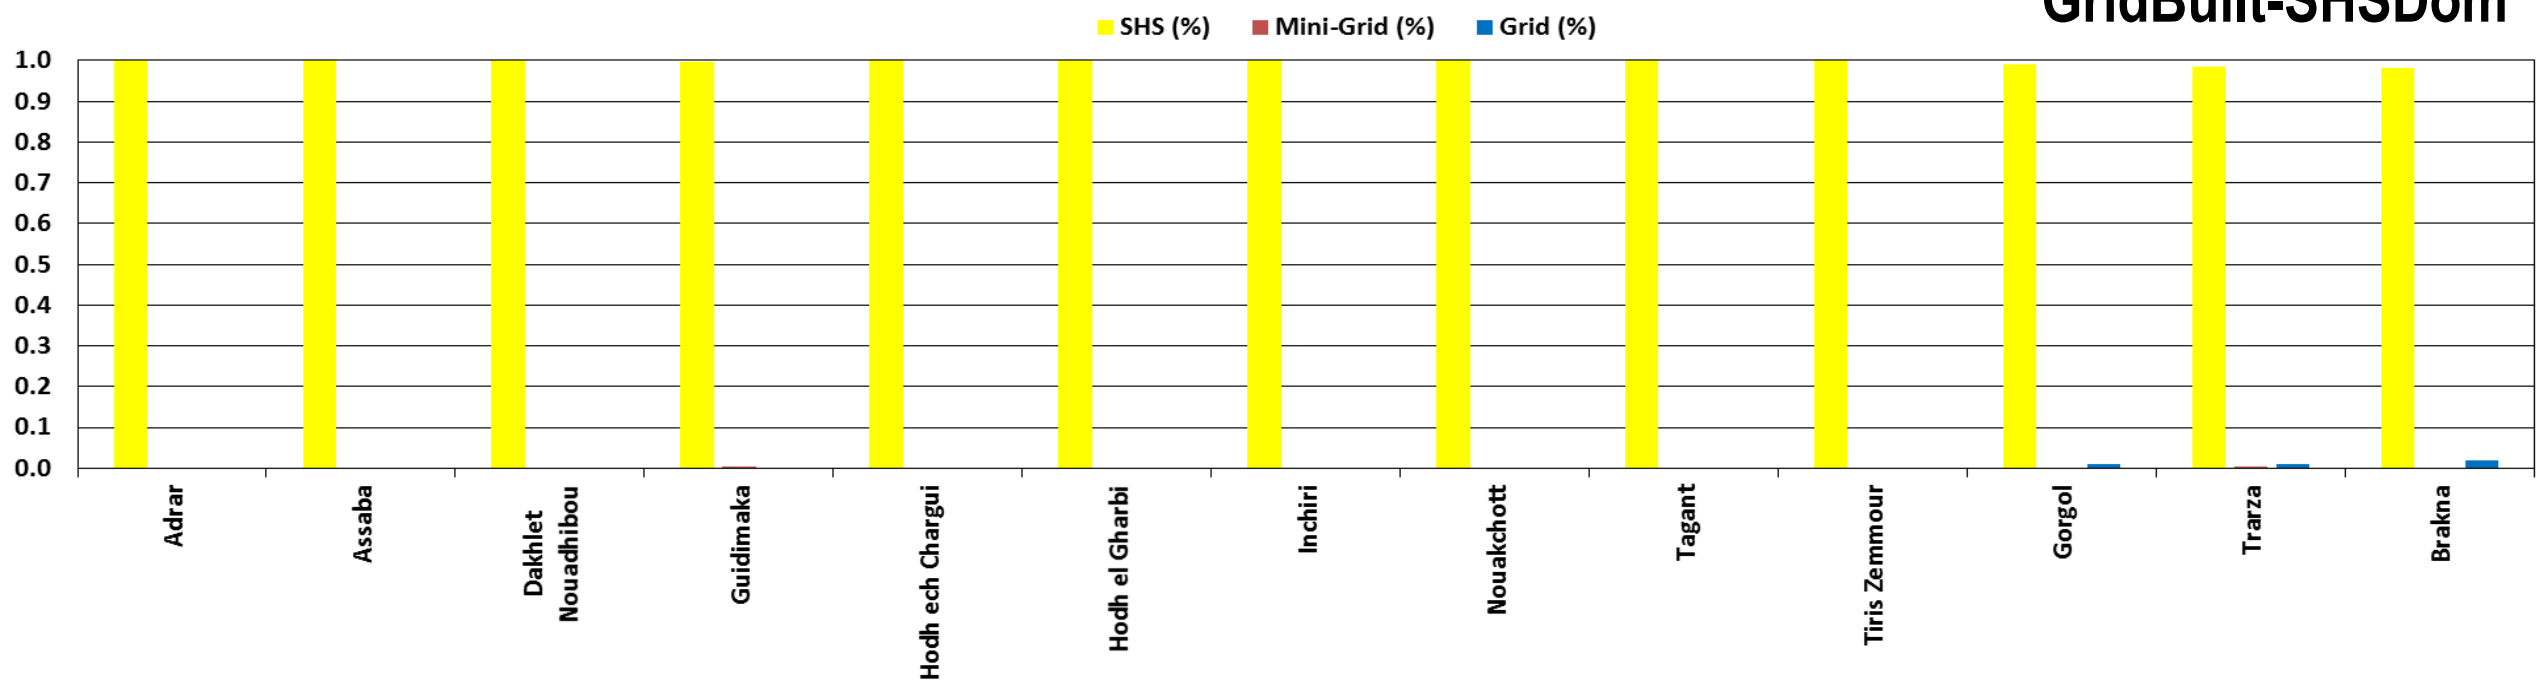

GridBuilt-SHSDom

# Electrification option in all Mauritanian regions: GridPlanned-GridDom

## Electrification options of Mauritanian regions

Electrification option

- Solar Home System
- Mini-Grid
- Grid Extension

River and Lake

0 100 200 300 400 km

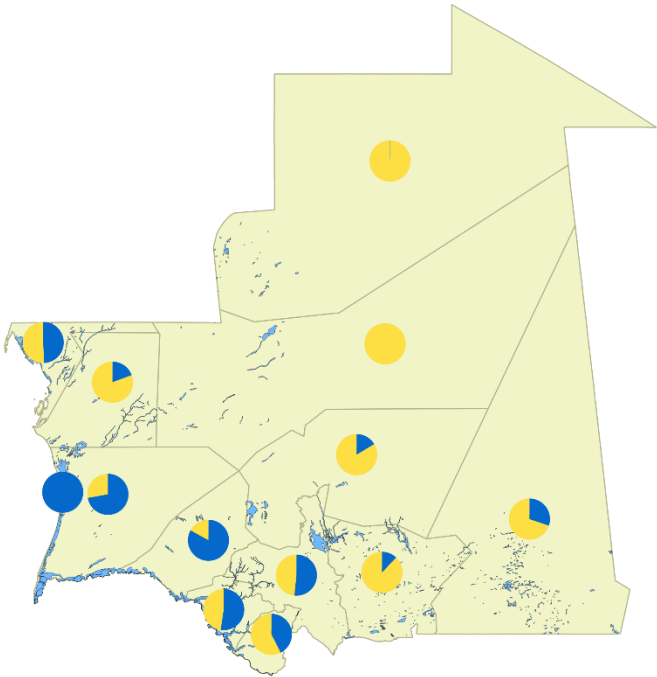

## Electrification options of Mauritanian regions

Electrification option

- Solar Home System
- Mini-Grid
- Grid Extension

Grid Buffer (diameter)

- 50 km
- Power Grid
- River and Lake

0 100 200 300 400 km

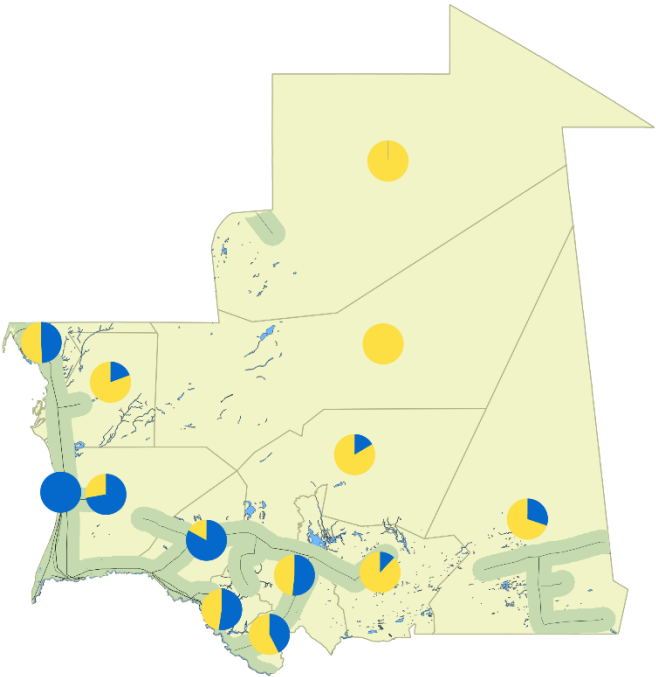

# Electrification option in all Mauritanian regions: GridPlanned-SHSDom

## Electrification options of Mauritanian regions

Electrification option

- Solar Home System
- Mini-Grid
- Grid Extension

River and Lake

0 100 200 300 400 km

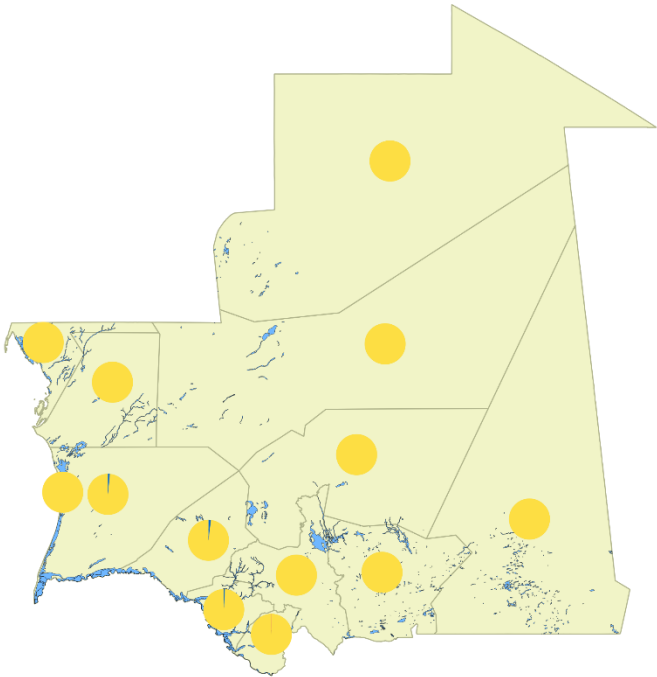

## Electrification options of Mauritanian regions

Electrification option

- Solar Home System
- Mini-Grid
- Grid Extension

Grid Buffer (diameter)

- 50 km
- Power Grid
- River and Lake

0 100 200 300 400 km

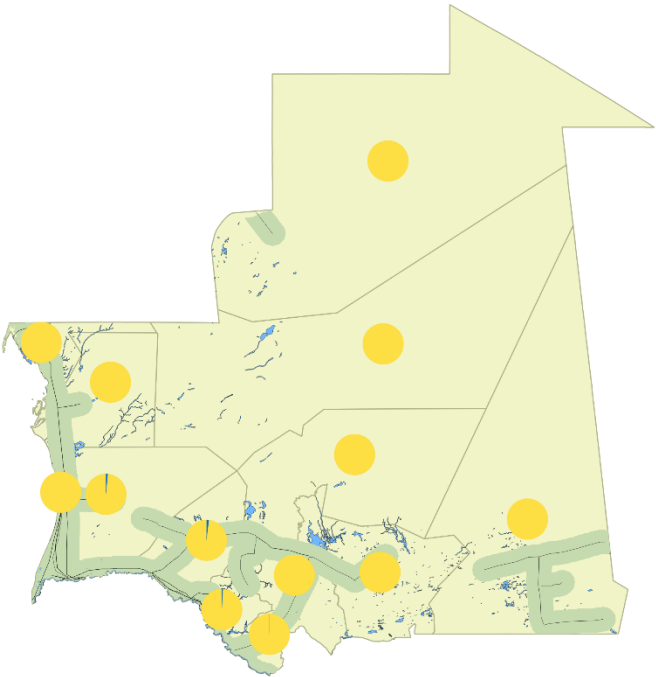

# Electrification option: GridPlanned-SHSDom

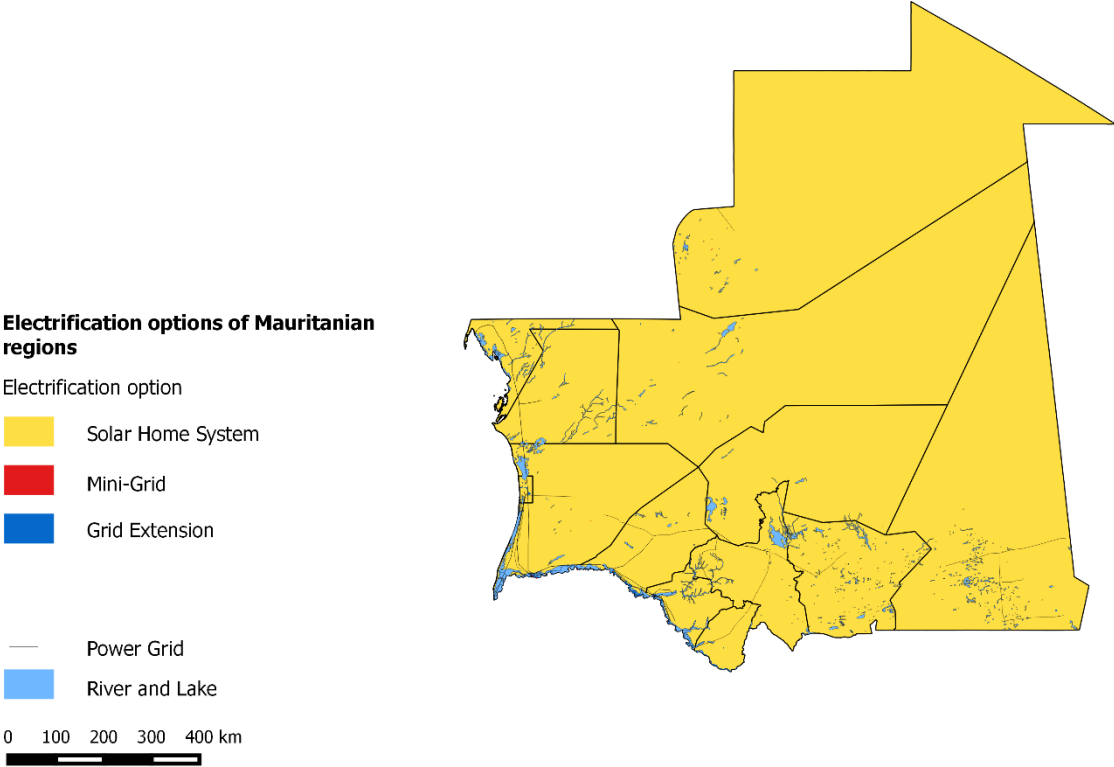

# Electrification option: GridPlanned-GridDom

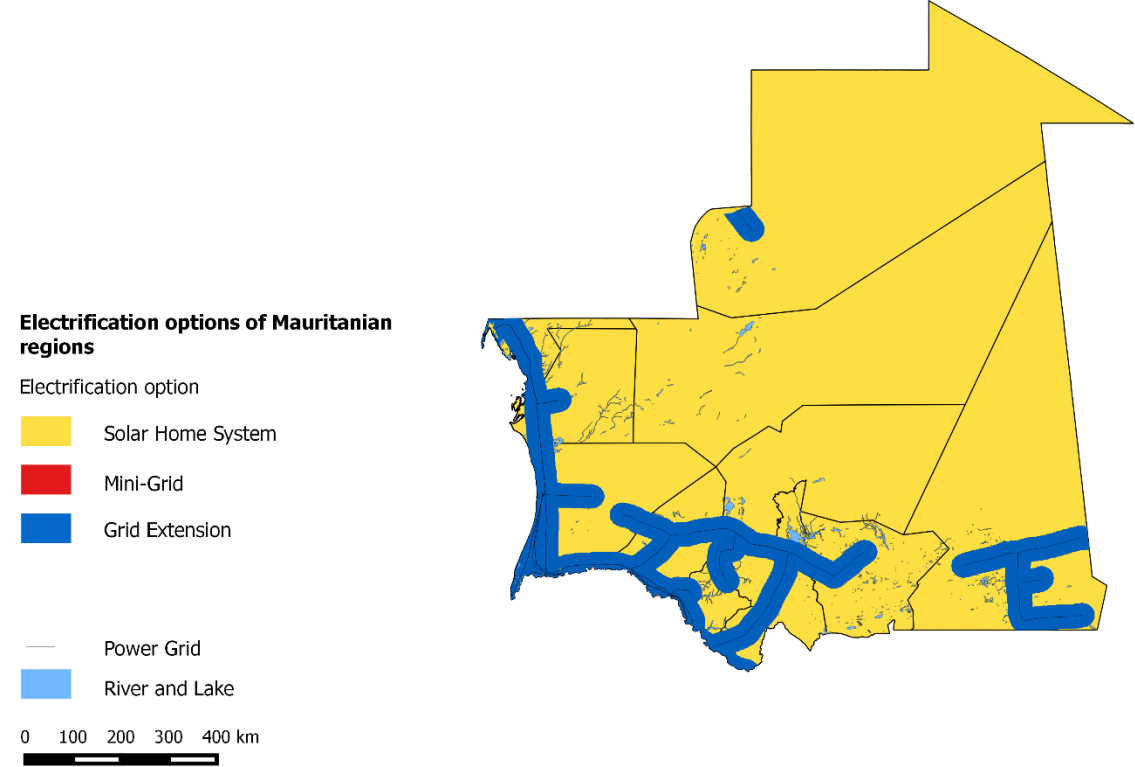

Share of electrification options in all Mauritanian regions

SHS (%) Mini-Grid (%) Grid (%)

GridPlanned-GridDom

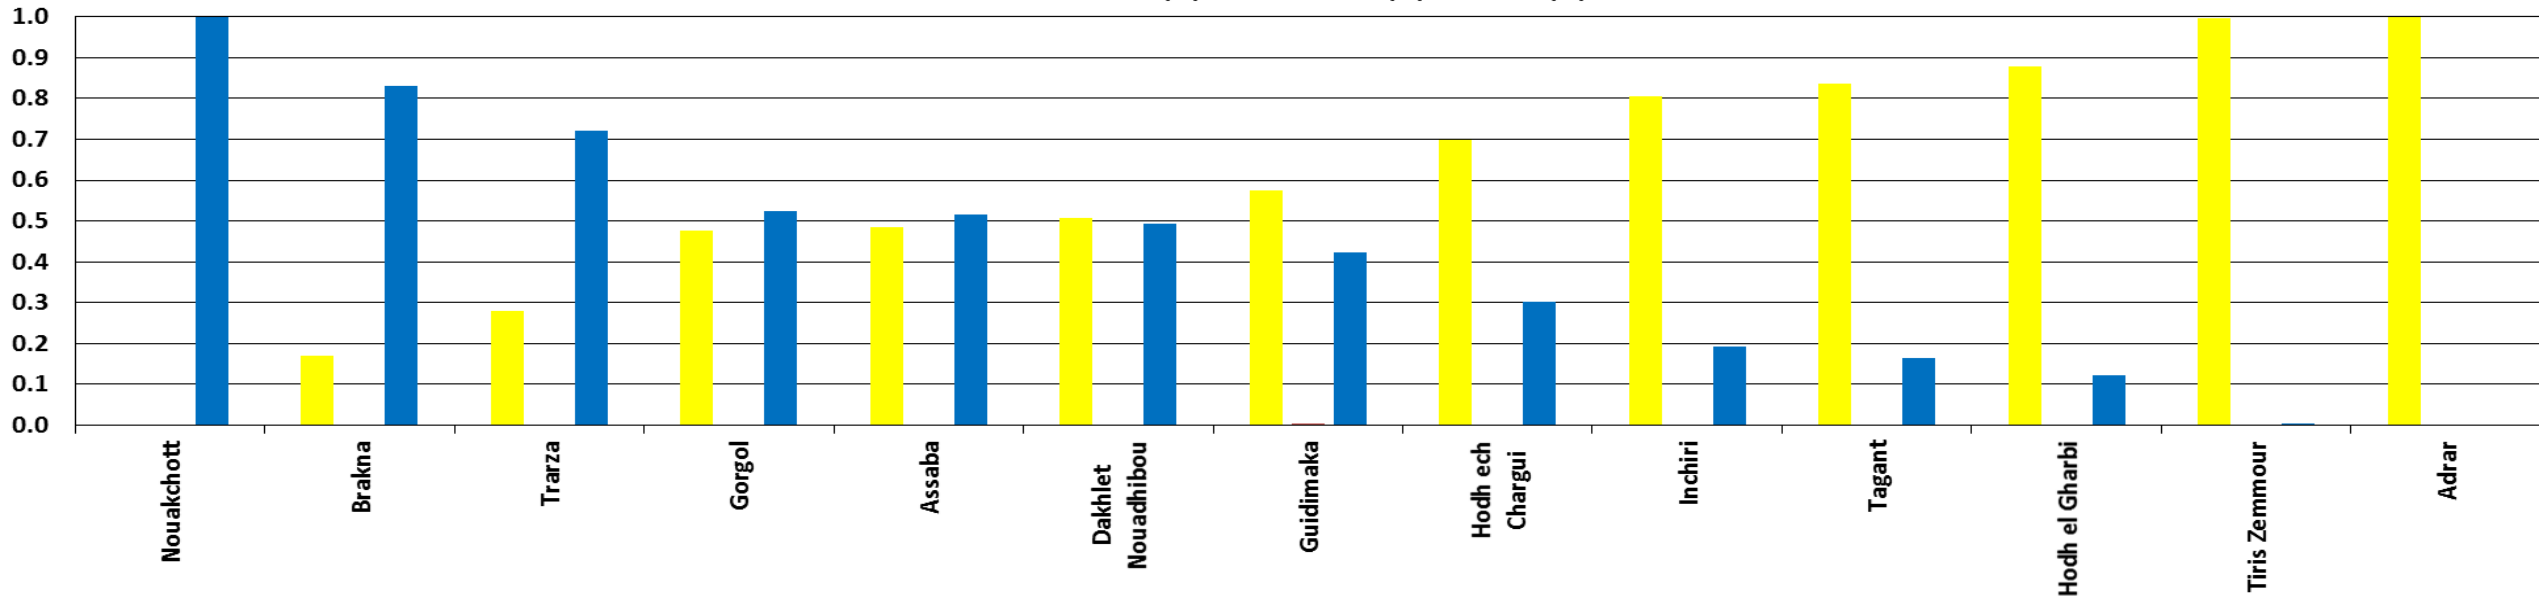

Share of electrification options in all Mauritanian regions

SHS (%) Mini-Grid (%) Grid (%)

GridPlanned-SHSDom

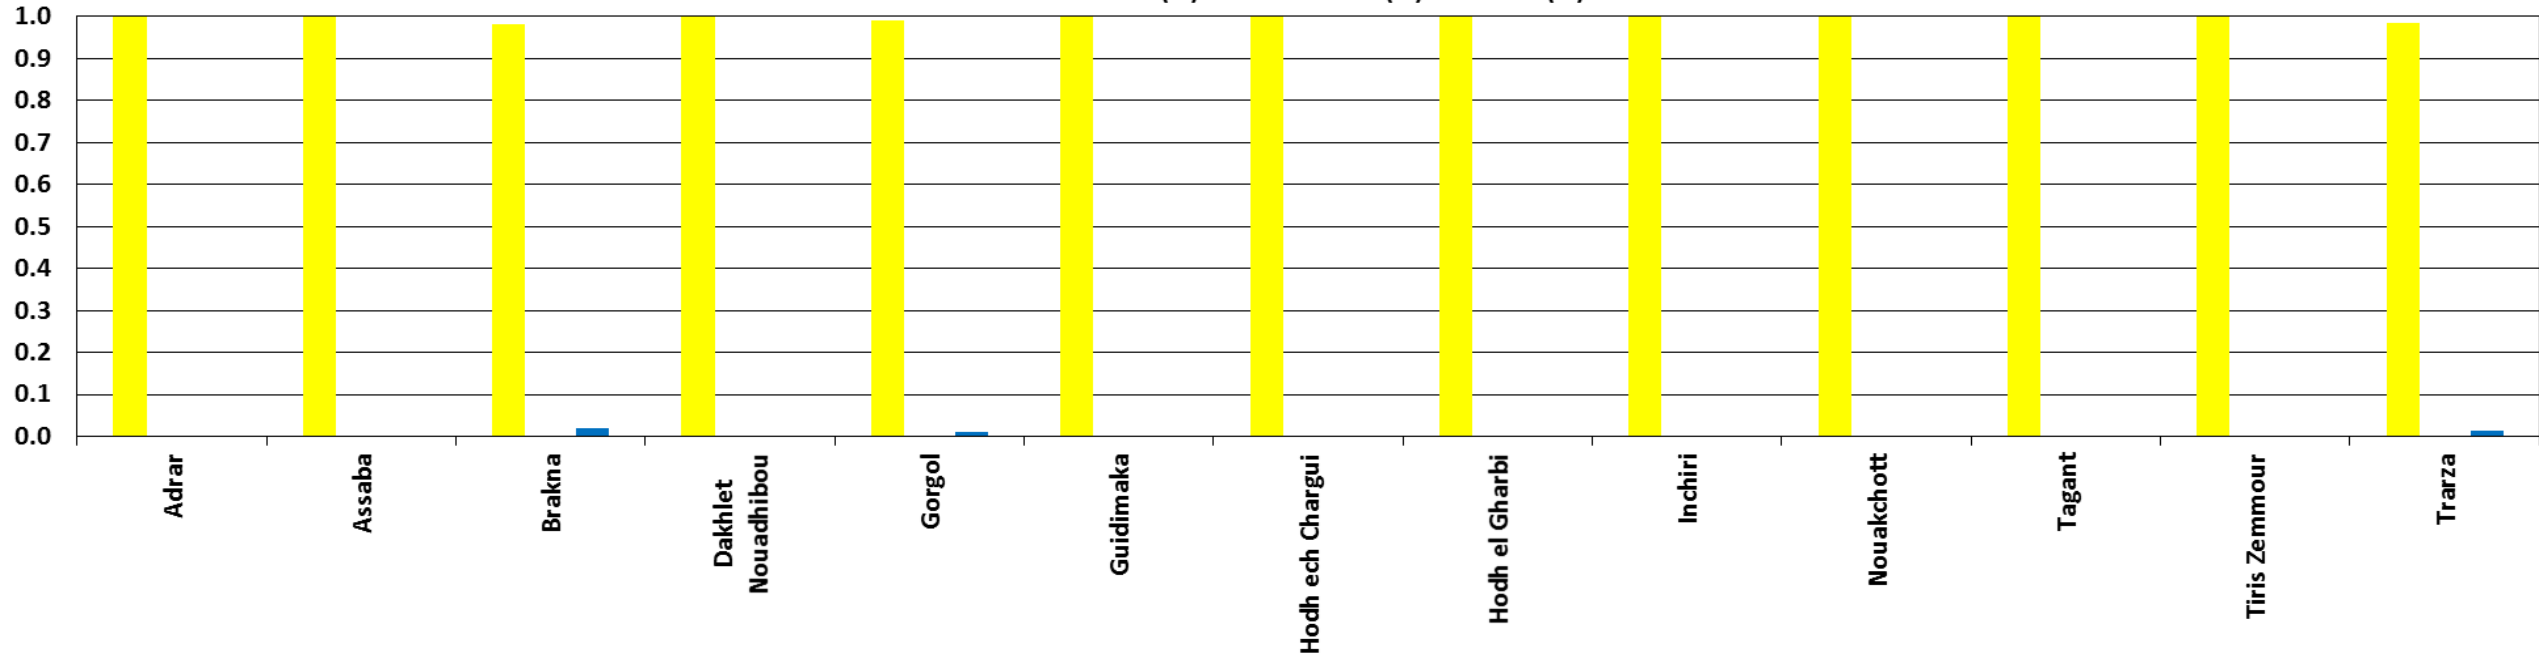

# Niger

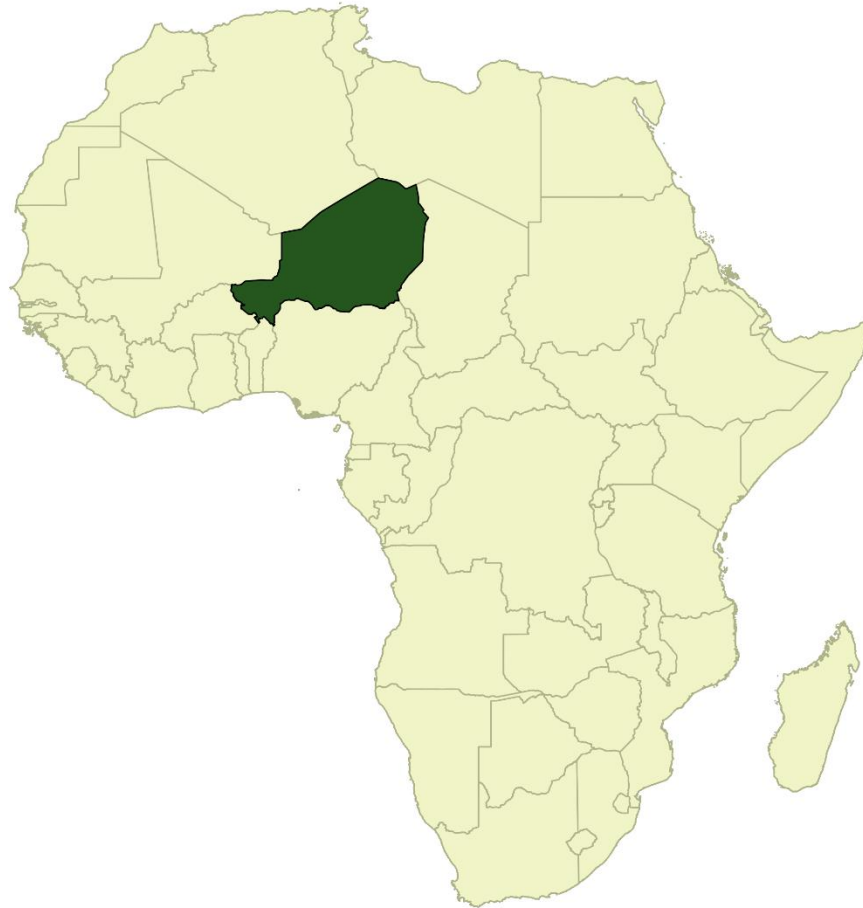

# Night light emission and Population of Nigerien regions

Night light emission in Niger

Detected night lights

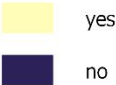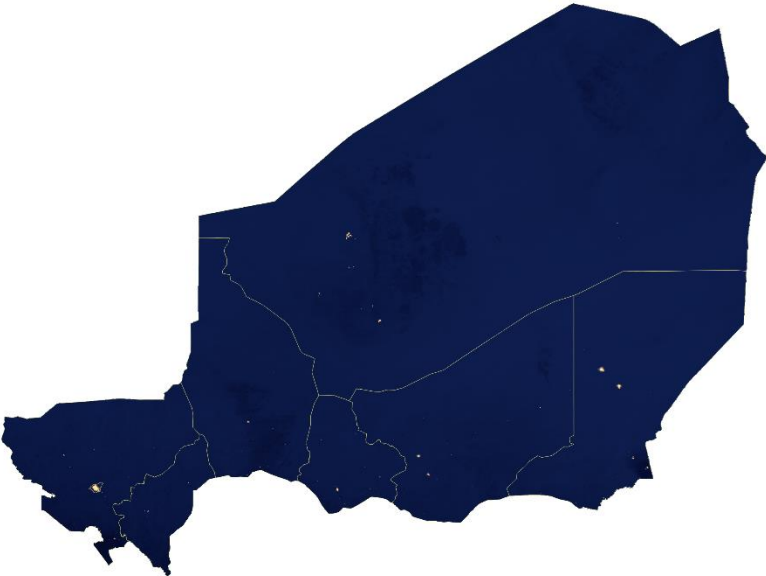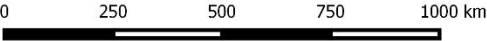

Population structure of Niger

Population density (people/750x750m<sup>2</sup>)

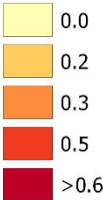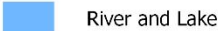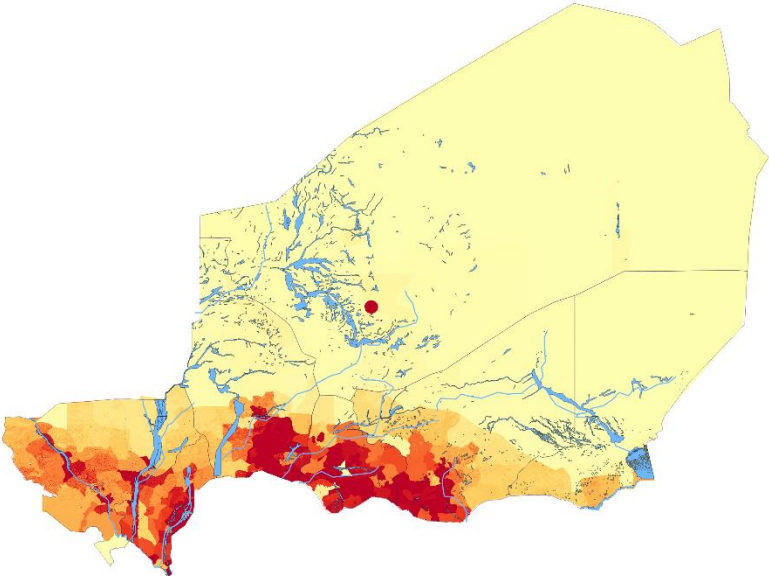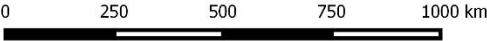

# Electrification option in all Nigerien regions: GridBuilt-GridDom

Electrification options of Nigerien regions

- Electrification option
- Solar Home System
  - Mini-Grid
  - Grid Extension
- River and Lake

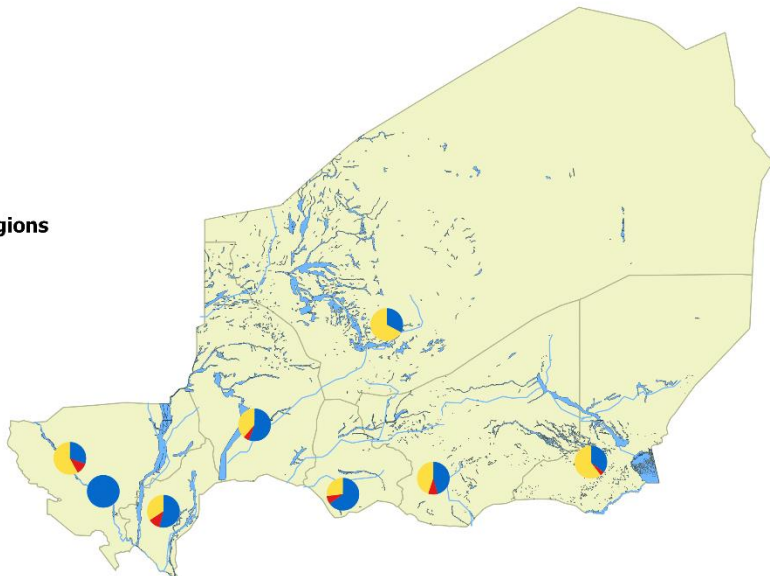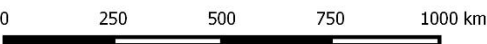

Electrification options of Nigerien regions

- Electrification option
- Solar Home System
  - Mini-Grid
  - Grid Extension
- Grid Buffer (diameter)
- 50 km
- Power Grid
- River and Lake

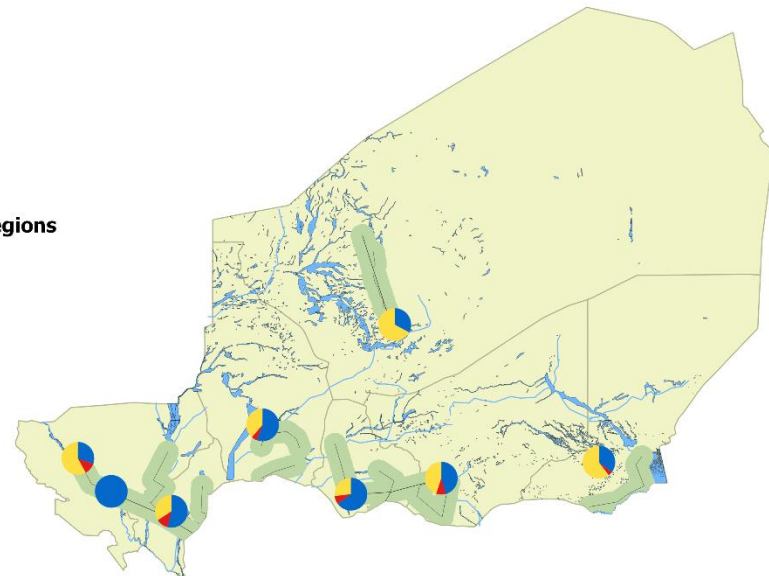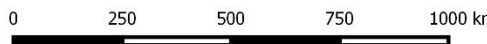

# Electrification option in all Nigerien regions: GridBuilt-SHSDom

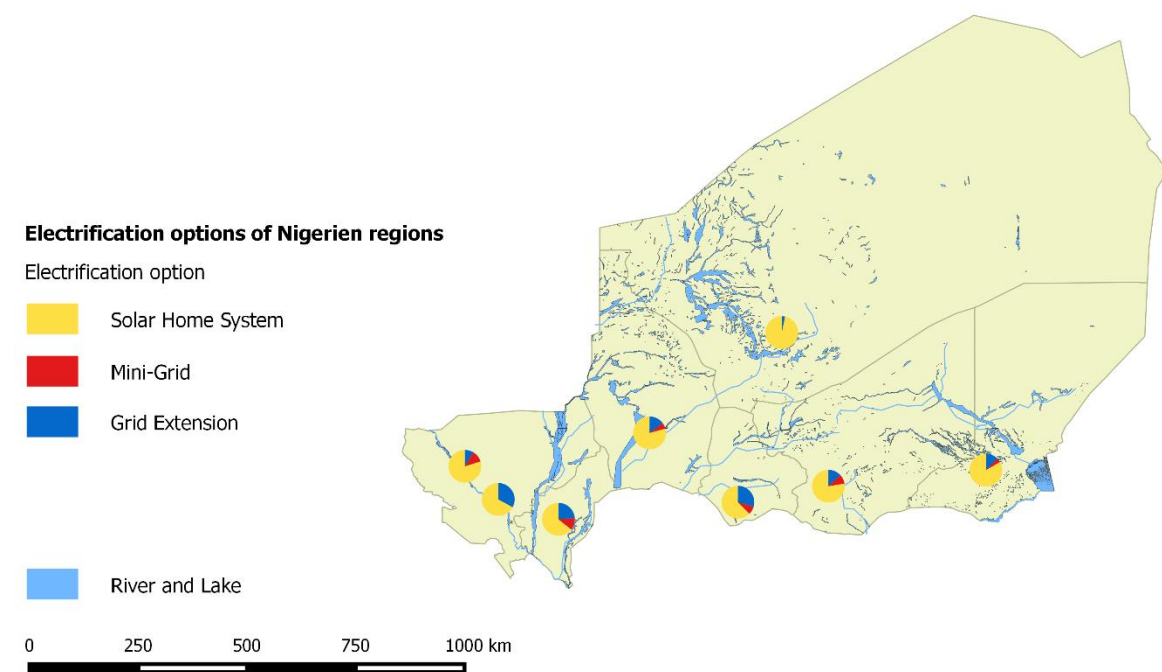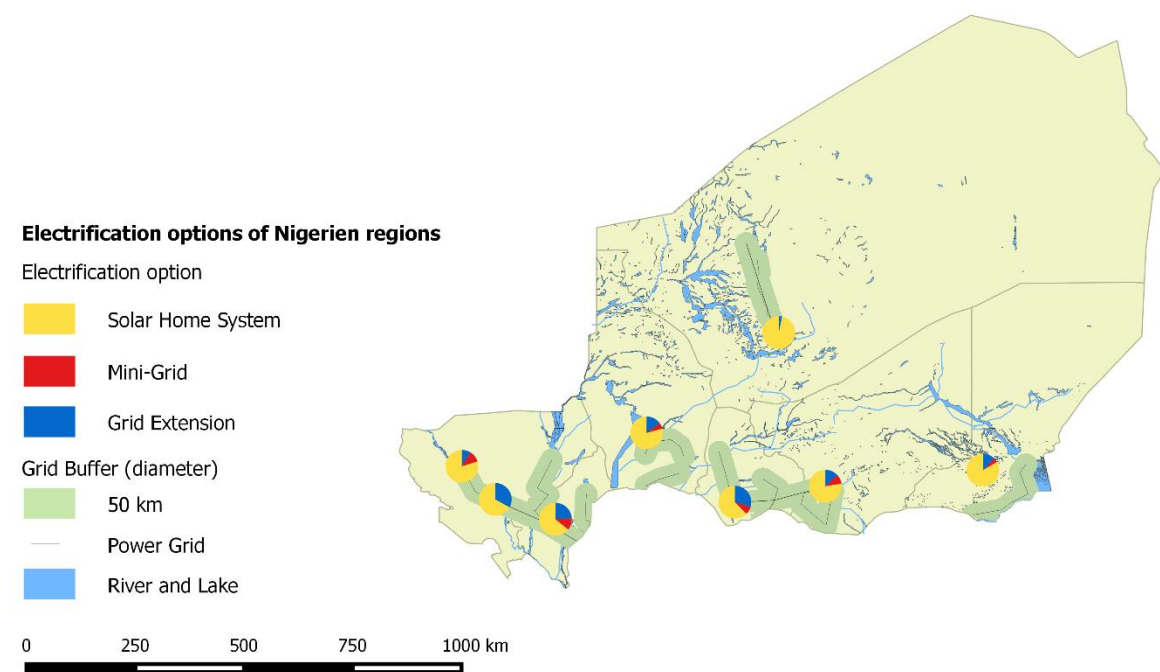

# Electrification option: GridBuilt-SHSDom

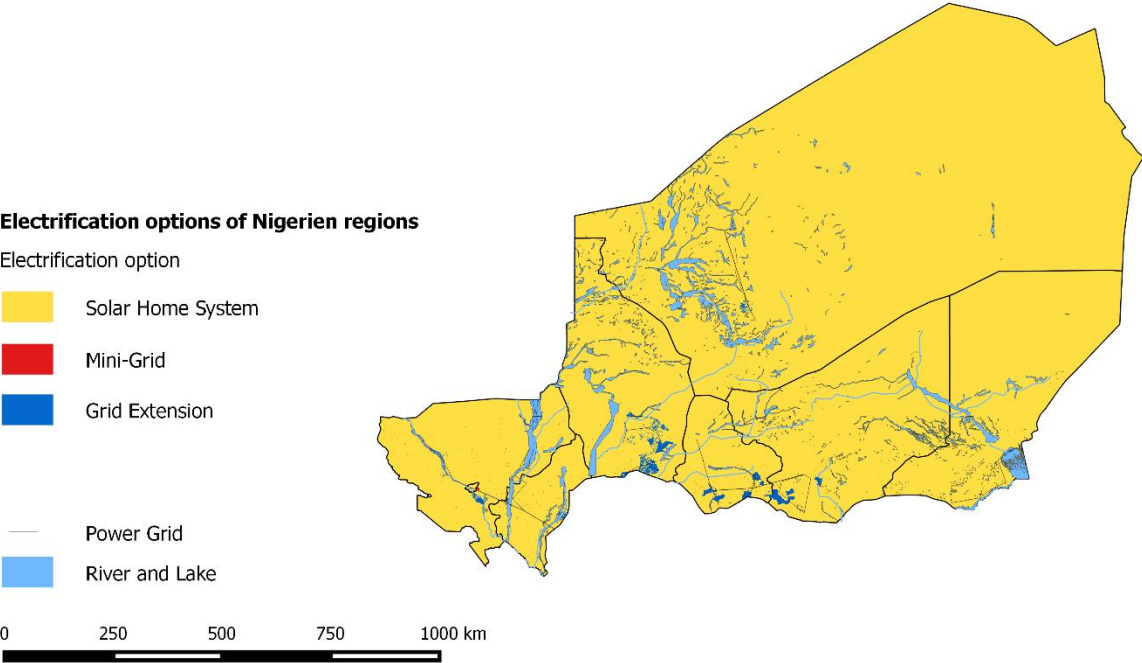

# Electrification option: GridBuilt-GridDom

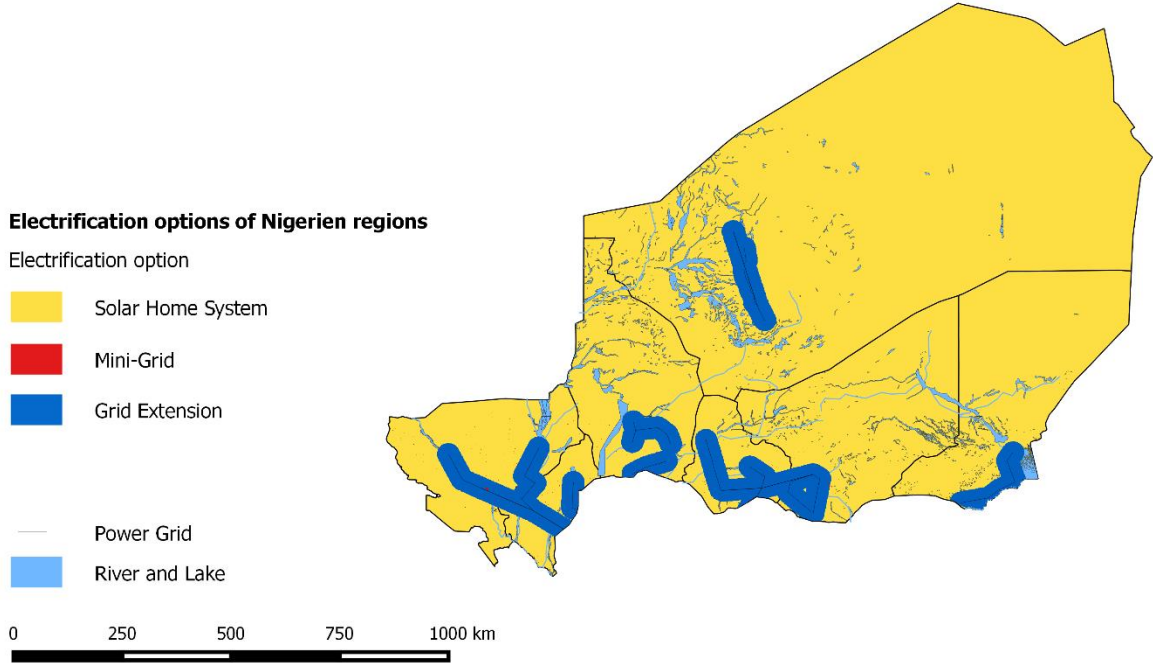

Share of electrification options in all Nigerien regions

GridBuilt-GridDom

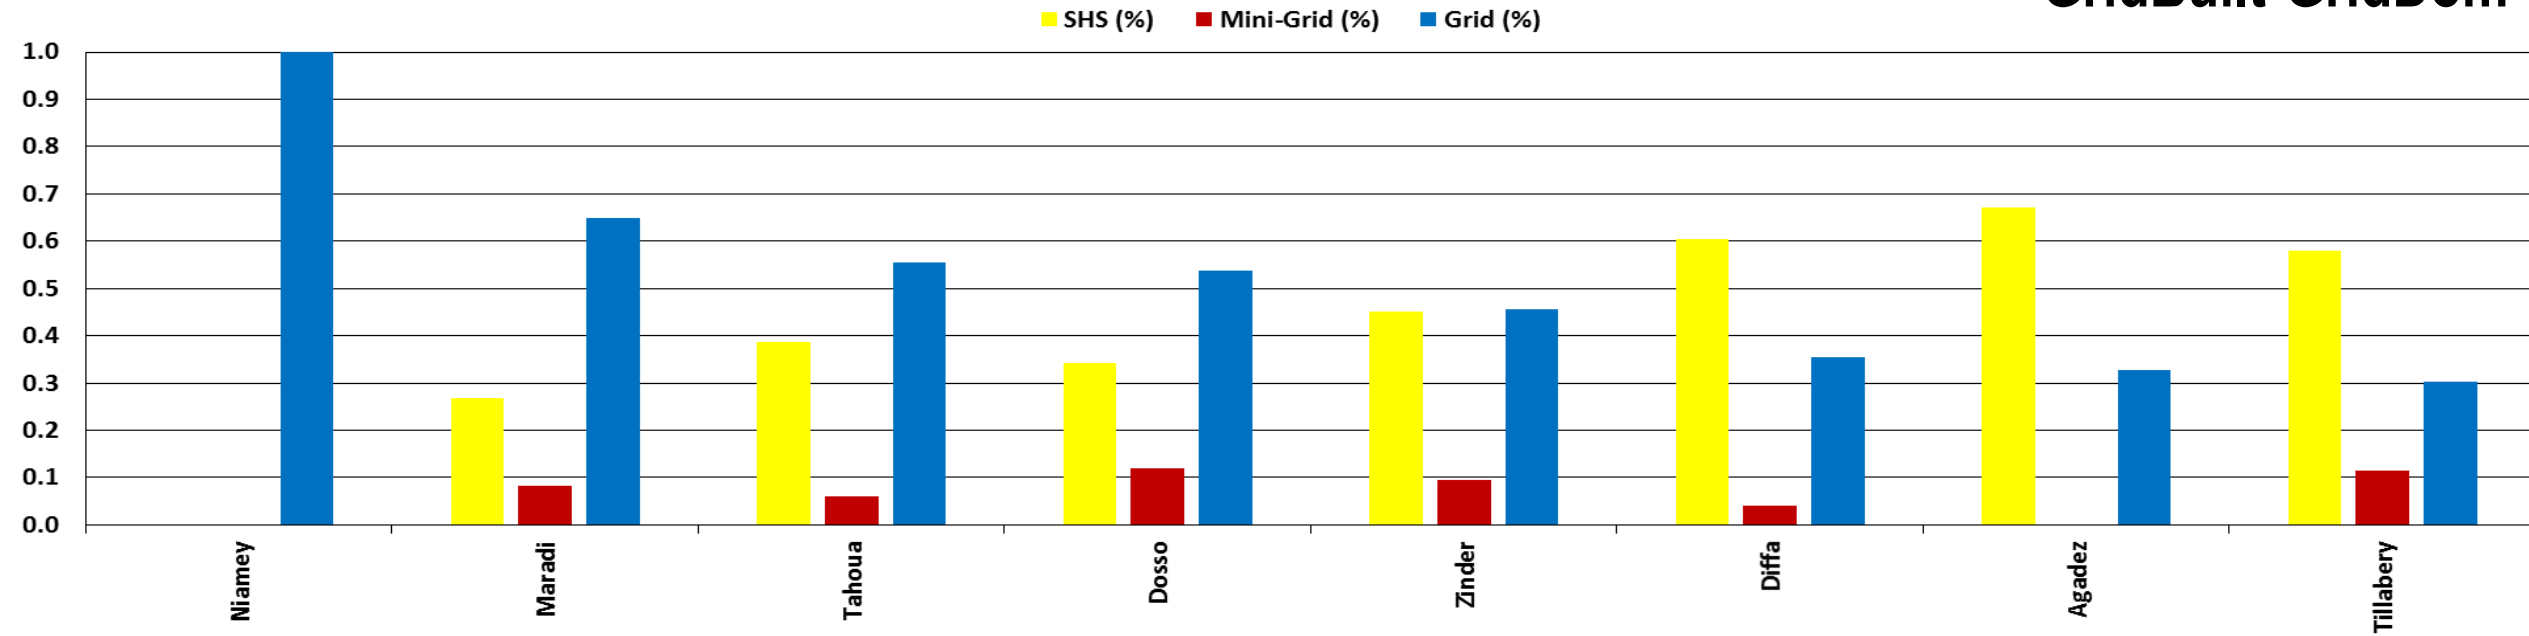

Share of electrification options in all Nigerien regions

GridBuilt-SHSDom

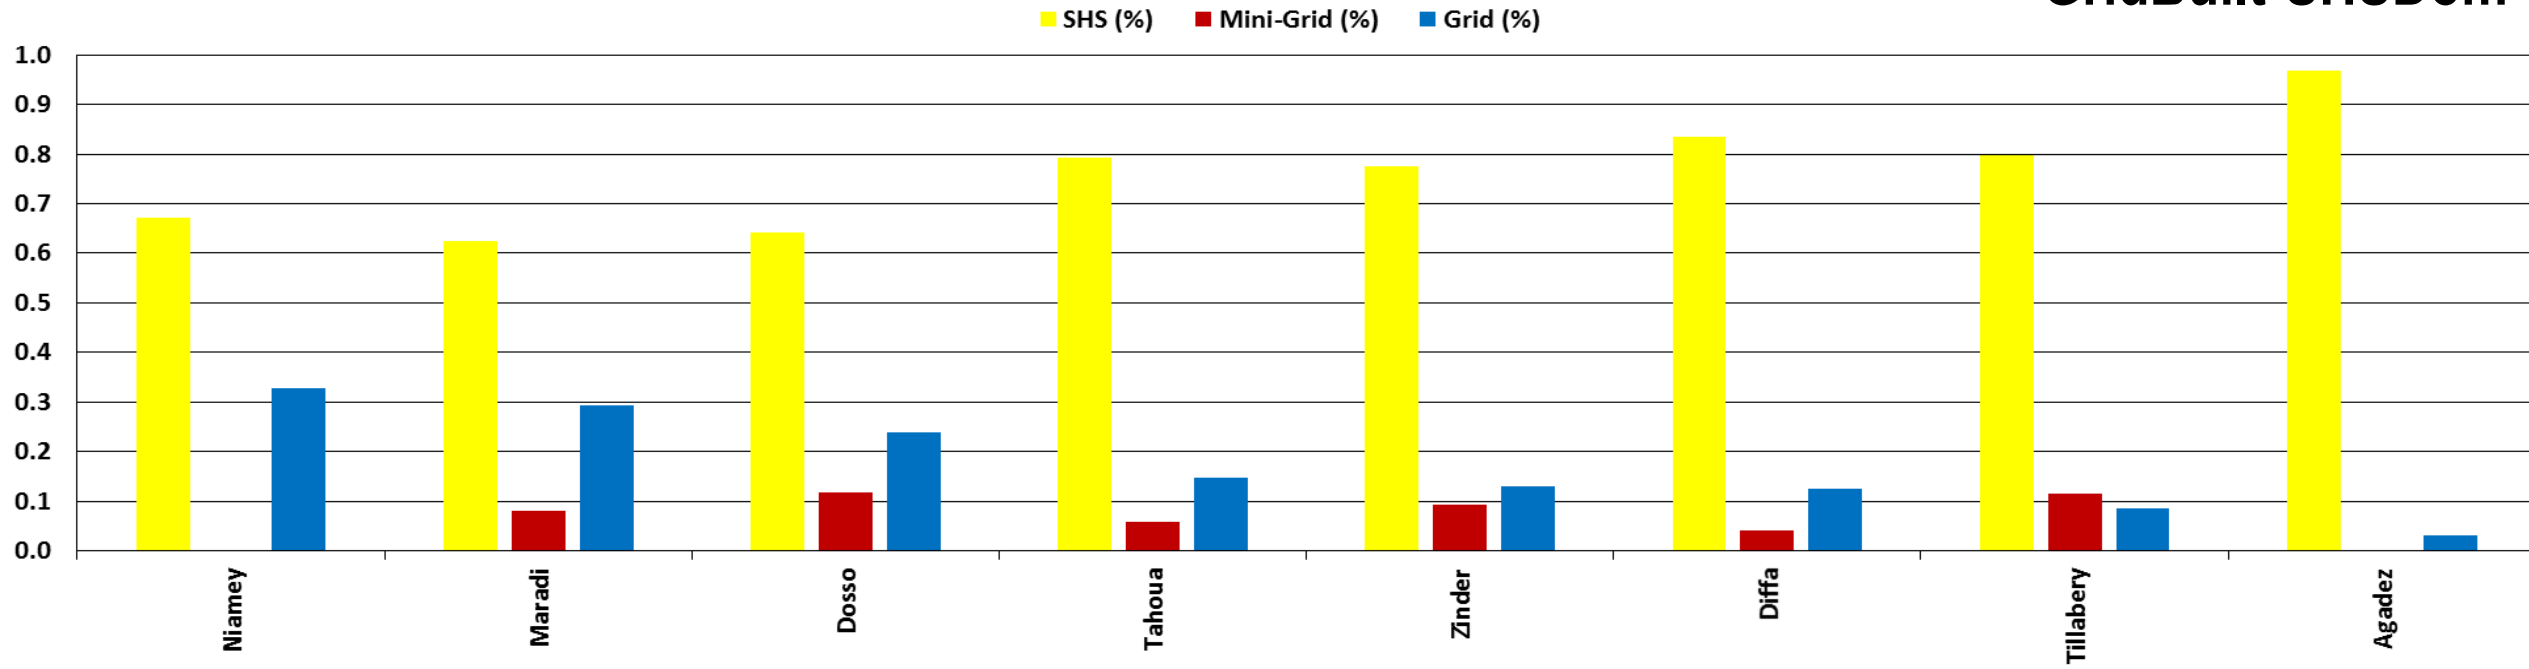

# Electrification option in all Nigerien regions: GridPlanned-GridDom

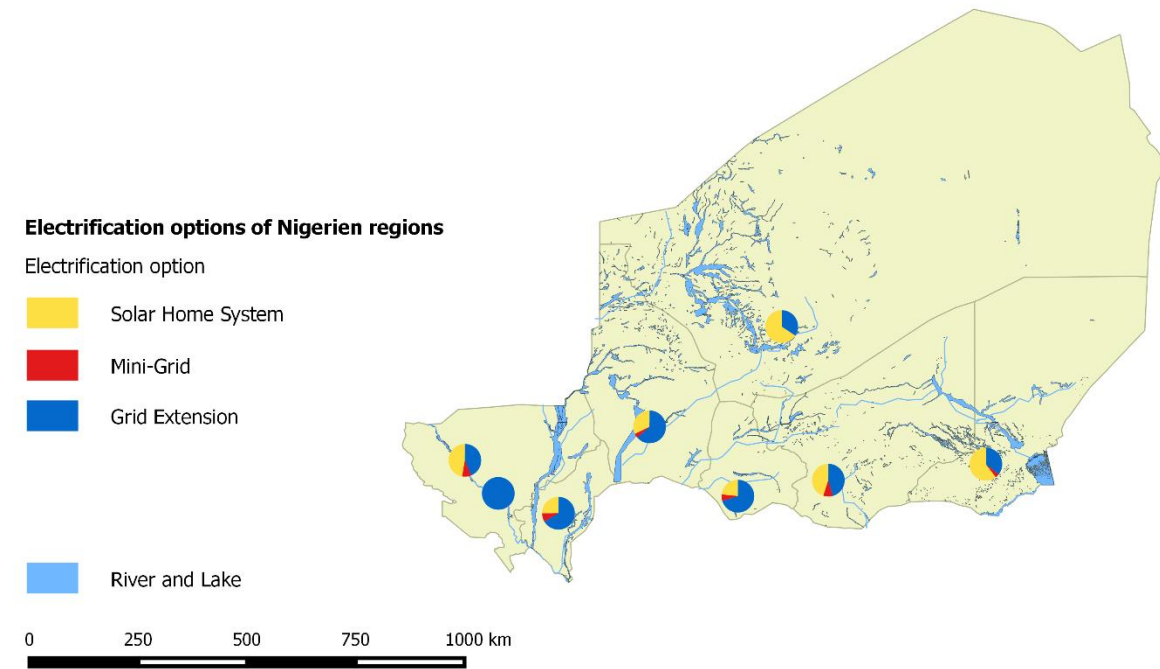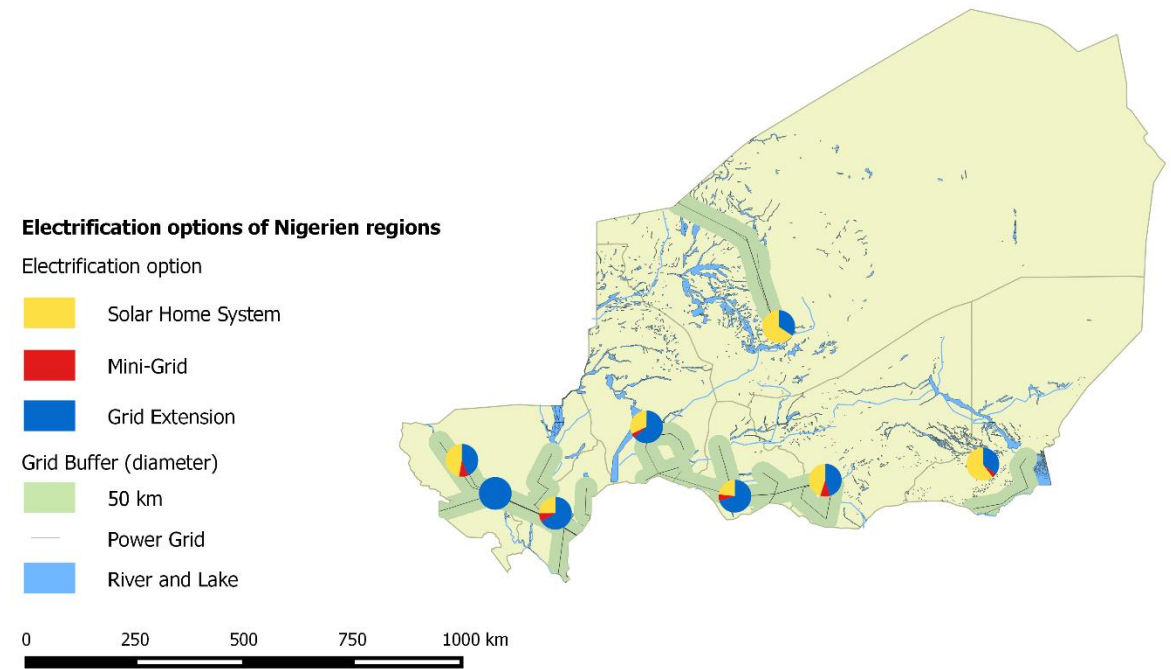

# Electrification option in all Nigerien regions: GridPlanned-SHSDom

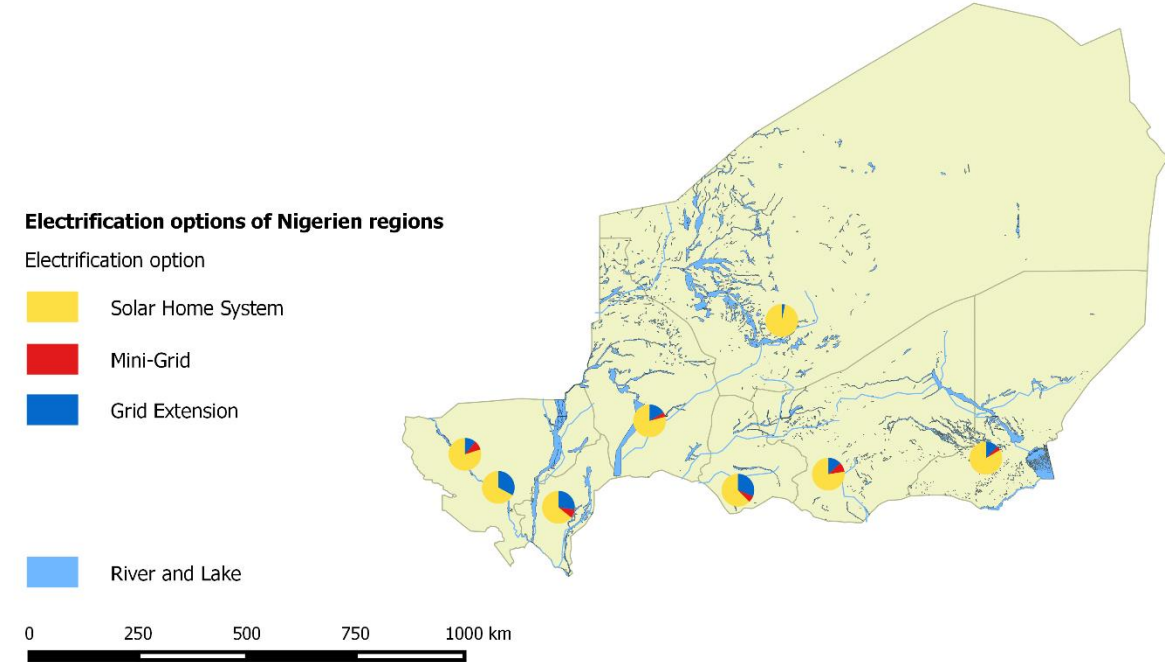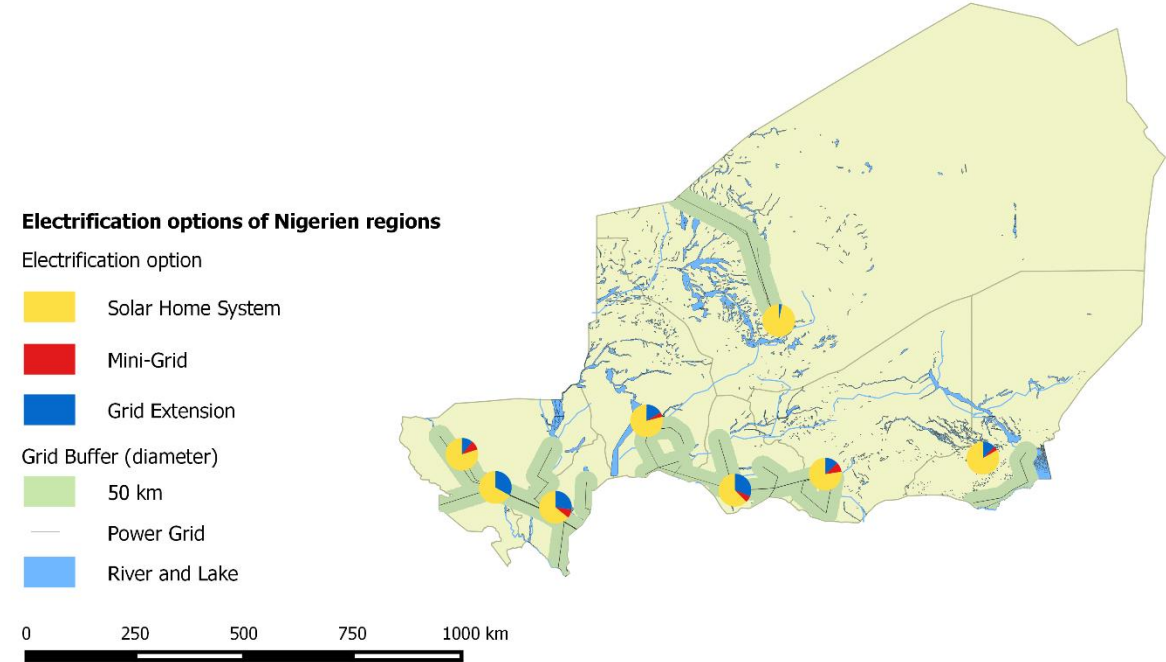

# Electrification option: GridPlanned-SHSDom

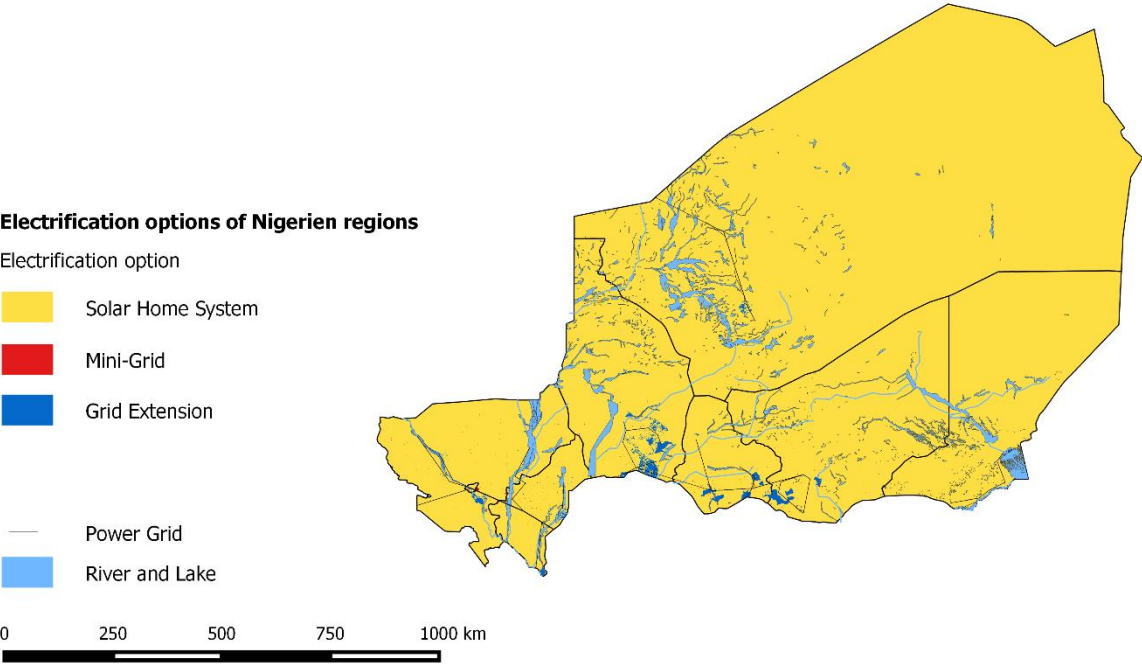

# Electrification option: GridPlanned-GridDom

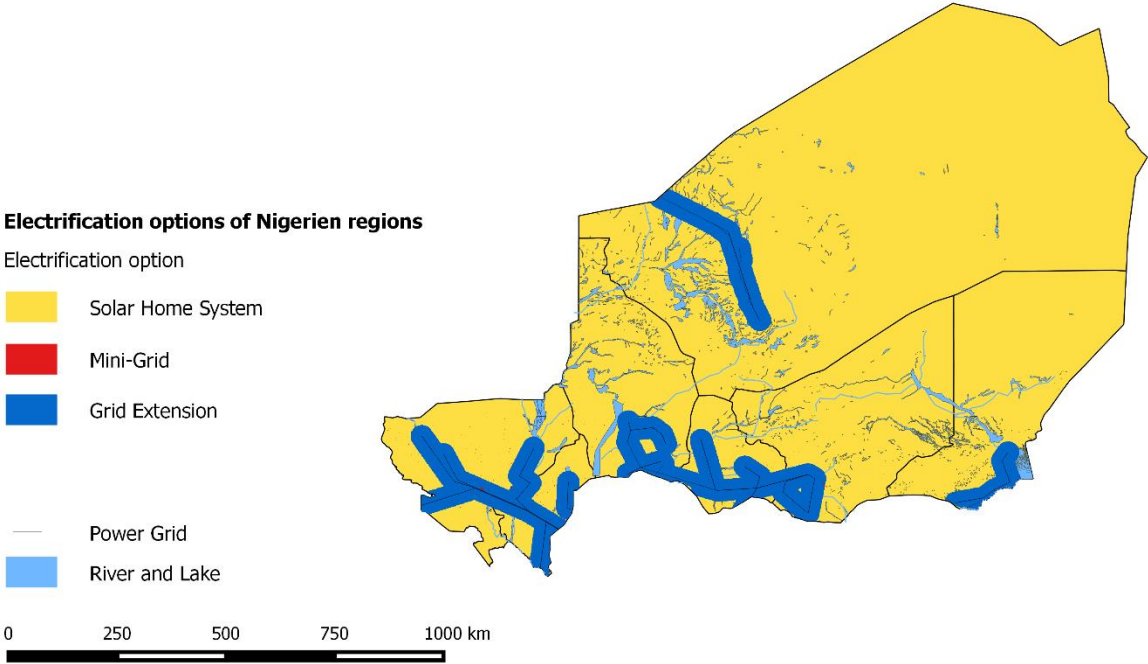

Share of electrification options in all Nigerien regions

GridPlanned-GridDom

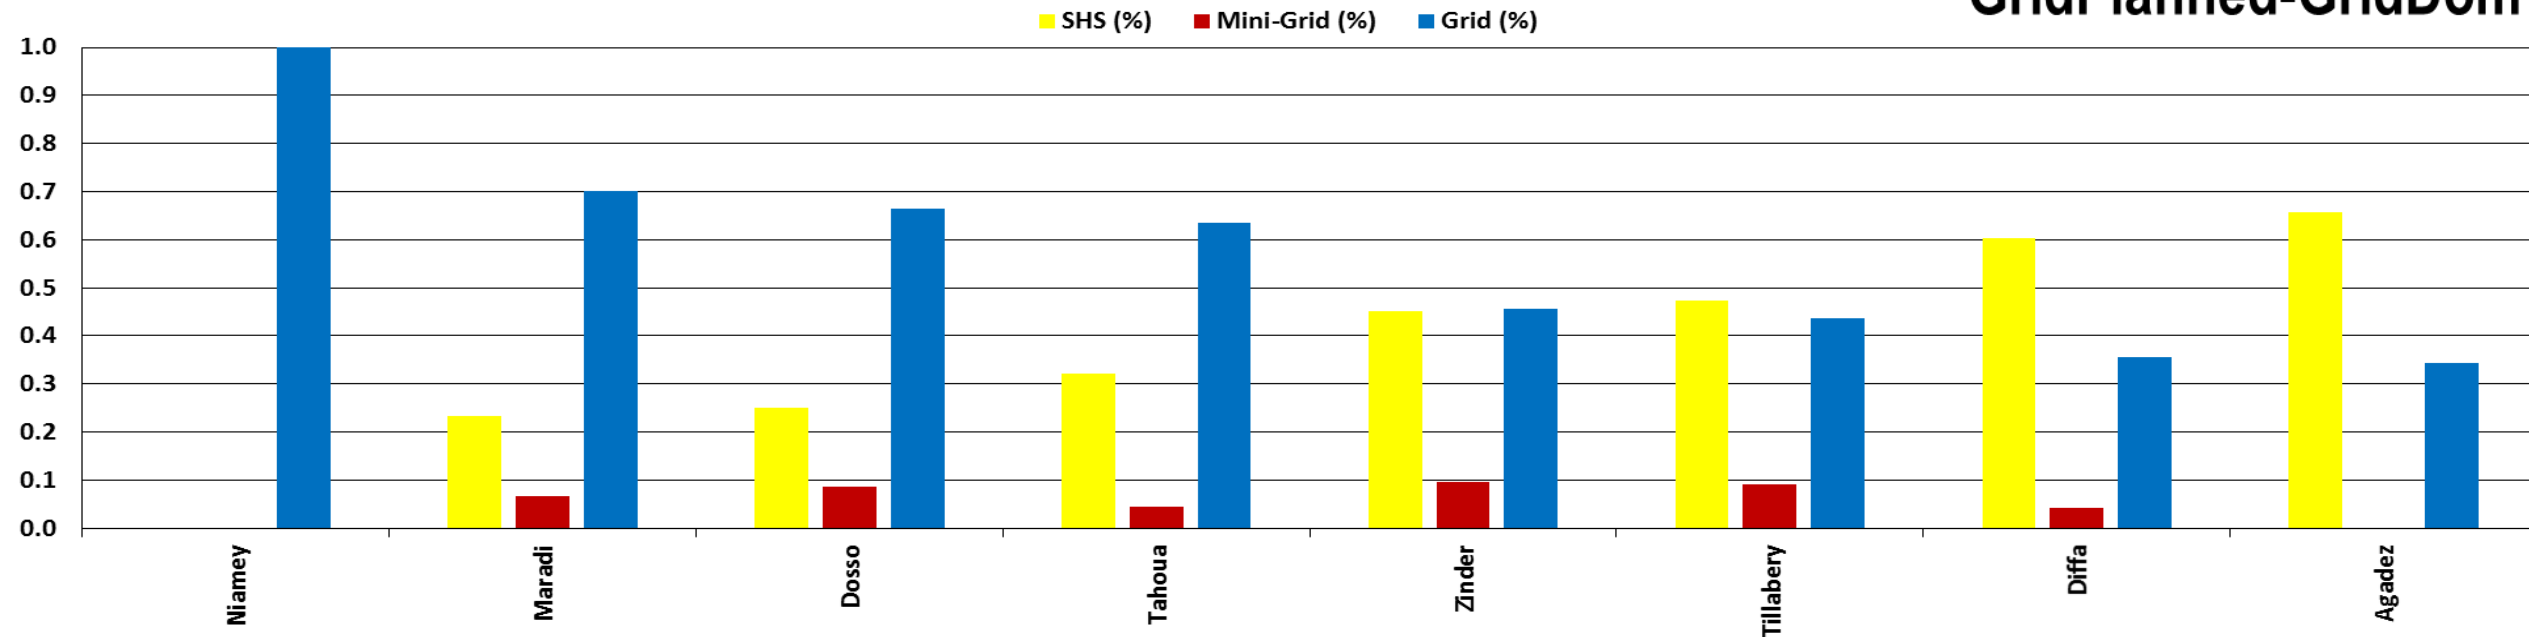

Share of electrification options in all Nigerien regions

GridPlanned-SHSDom

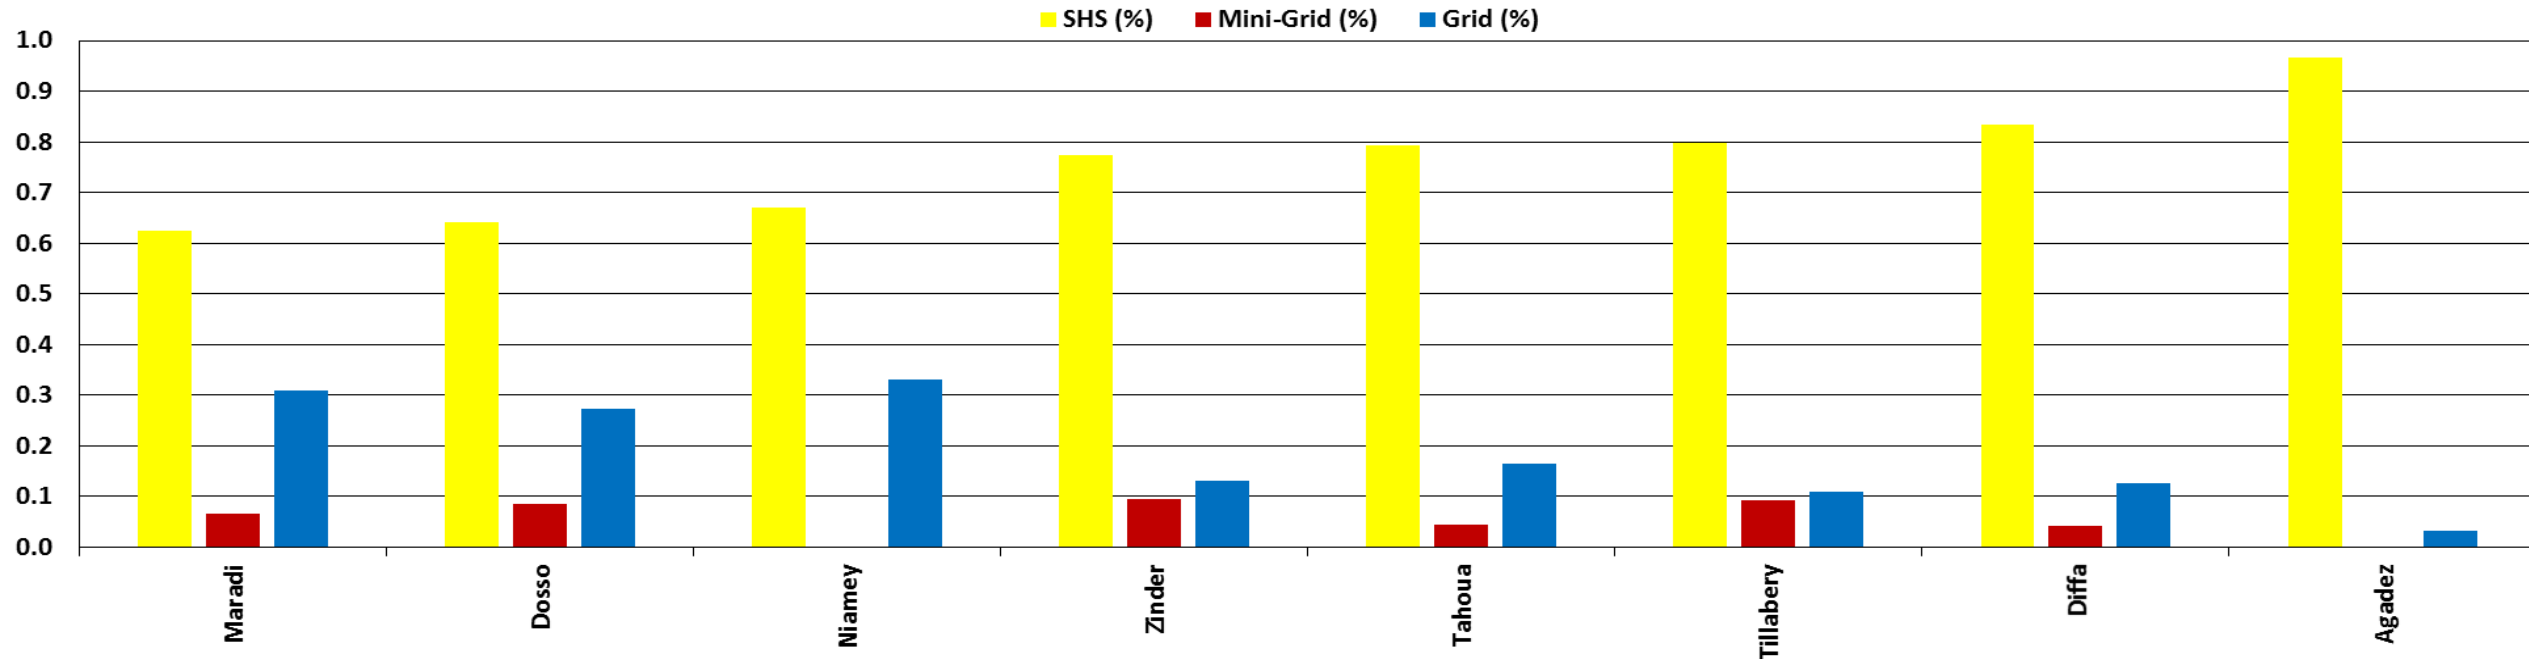

# Nigeria

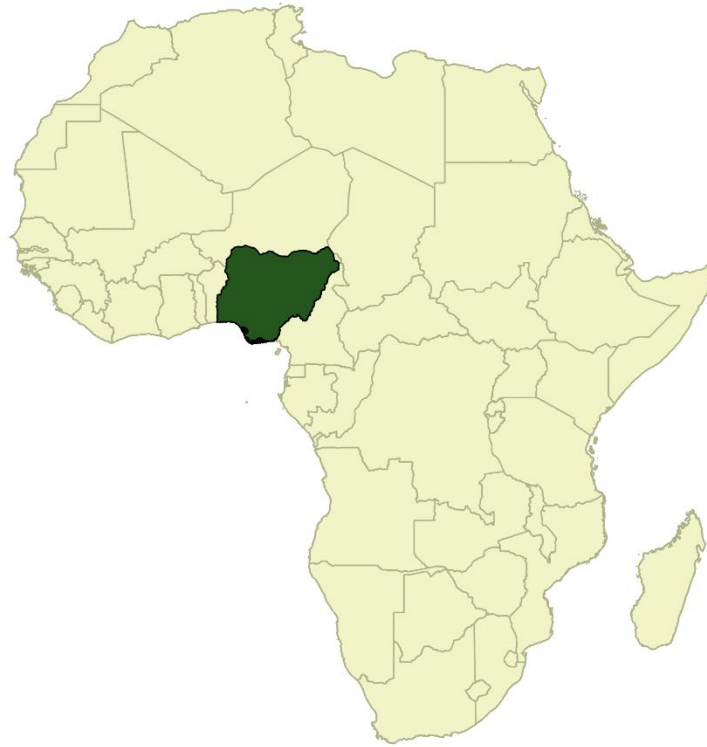

# Night light emission and Population of Nigerian states

## Night light emission in Nigeria

Detected night lights

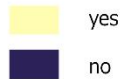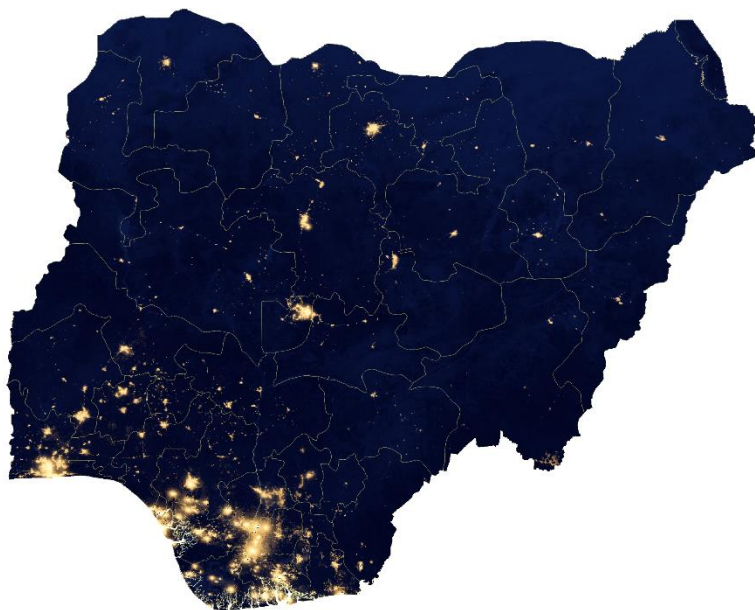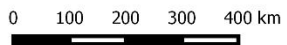

## Population structure in Nigeria

Population density (people/750x750m<sup>2</sup>)

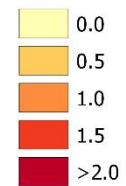

Ocean, River and Lake (blue)

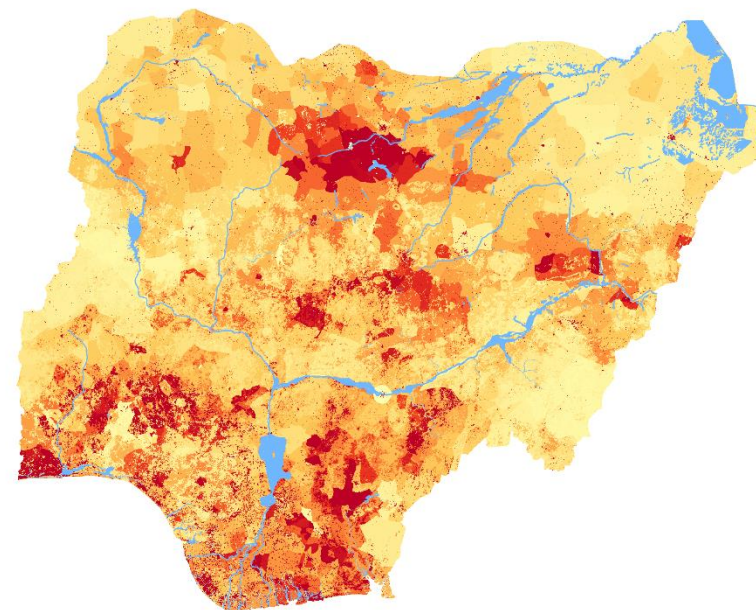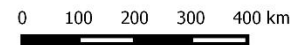

# Electrification option in all Nigerian states: GridBuilt-GridDom

## Electrification options of Nigerian states

Electrification option

- Solar Home System
- Mini-Grid
- Grid Extension

Ocean, River and Lake

0 100 200 300 400 km

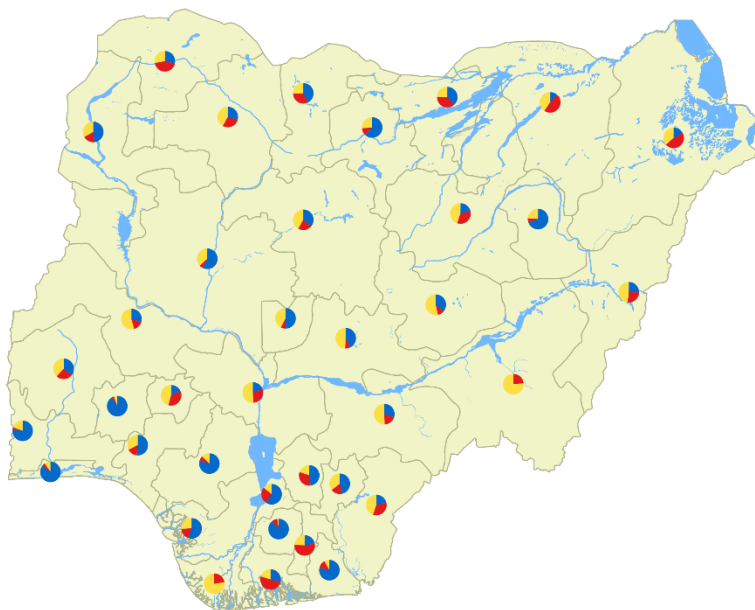

## Electrification options of Nigerian states

Electrification option

- Solar Home System
- Mini-Grid
- Grid Extension

Grid Buffer (diameter)

- 50 km
- Power Grid
- Ocean, River and Lake

0 100 200 300 400 km

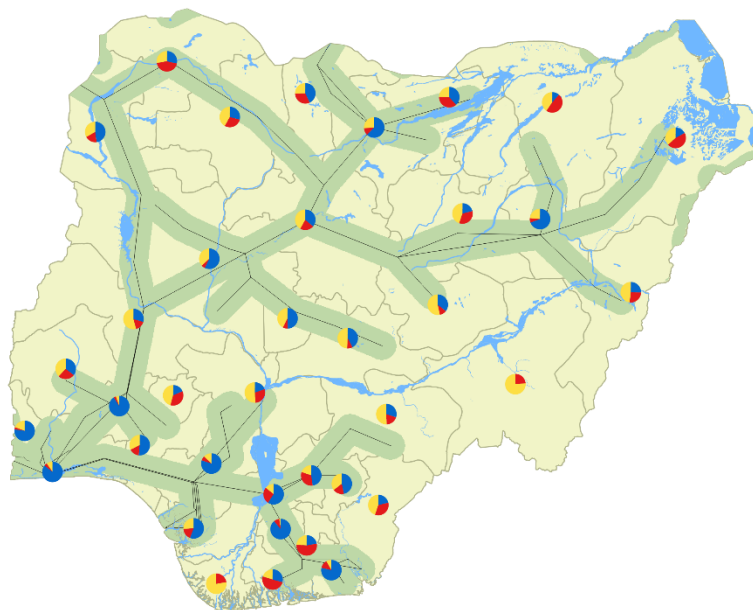

# Electrification option in all Nigerian states: GridBuilt-SHSDom

## Electrification options of Nigerian states

Electrification option

- Solar Home System
- Mini-Grid
- Grid Extension

Ocean, River and Lake

0 100 200 300 400 km

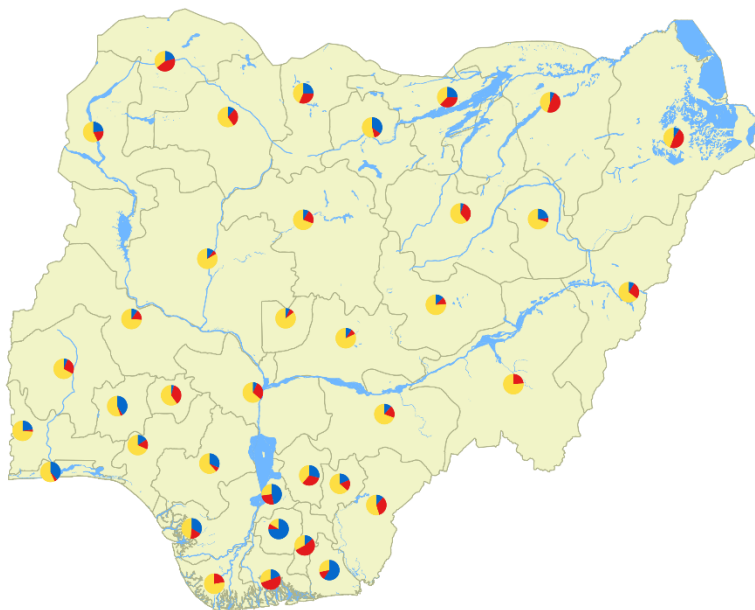

## Electrification options of Nigerian states

Electrification option

- Solar Home System
- Mini-Grid
- Grid Extension

Grid Buffer (diameter)

- 50 km
- Power Grid
- Ocean, River and Lake

0 100 200 300 400 km

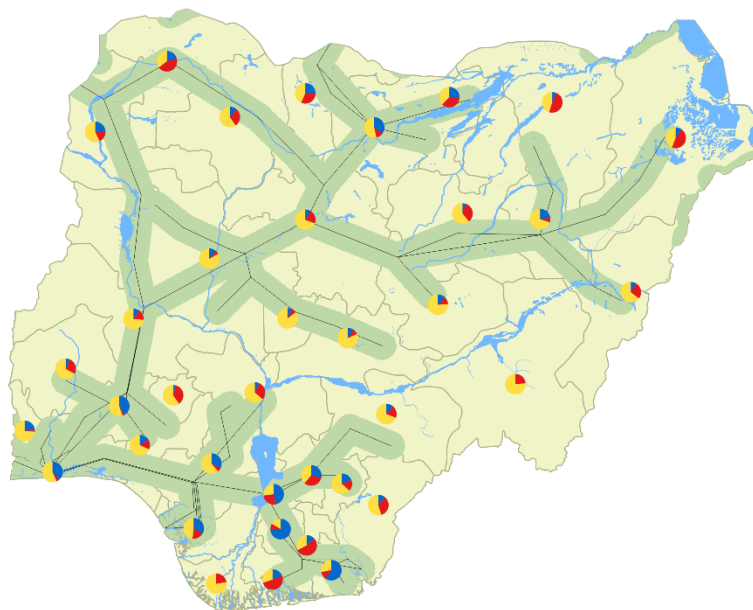

# Electrification option: GridBuilt-SHSDom

## Electrification options of Nigerian states

- Electrification option
- Solar Home System
  - Mini-Grid
  - Grid Extension

- Power Grid
- Ocean, River and Lake

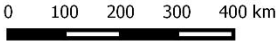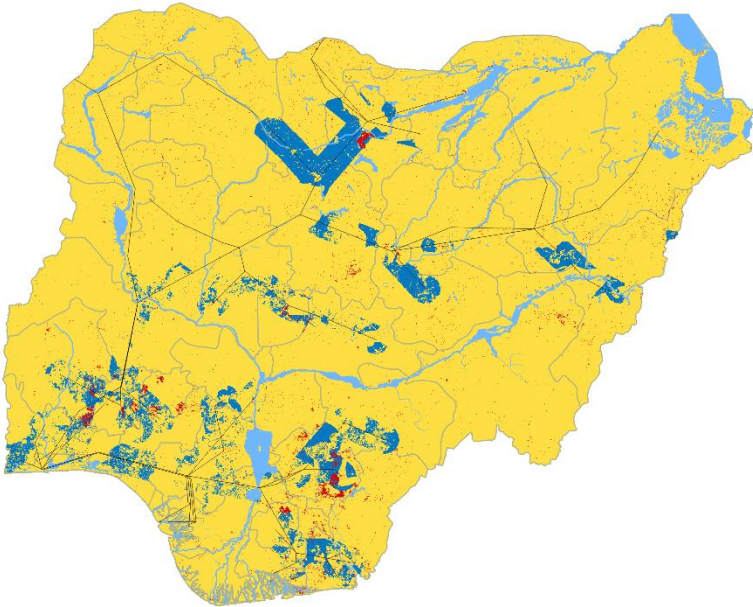

# Electrification option: GridBuilt-GridDom

## Electrification options of Nigerian states

- Electrification option
- Solar Home System
  - Mini-Grid
  - Grid Extension

- Power Grid
- Ocean, River and Lake

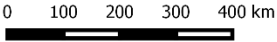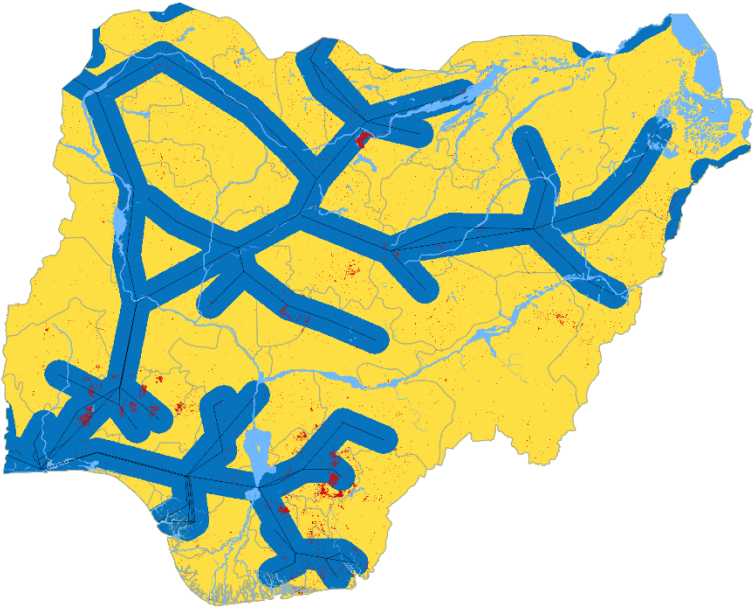

Share of electrification options in all Nigerian states

GridBuilt-GridDom

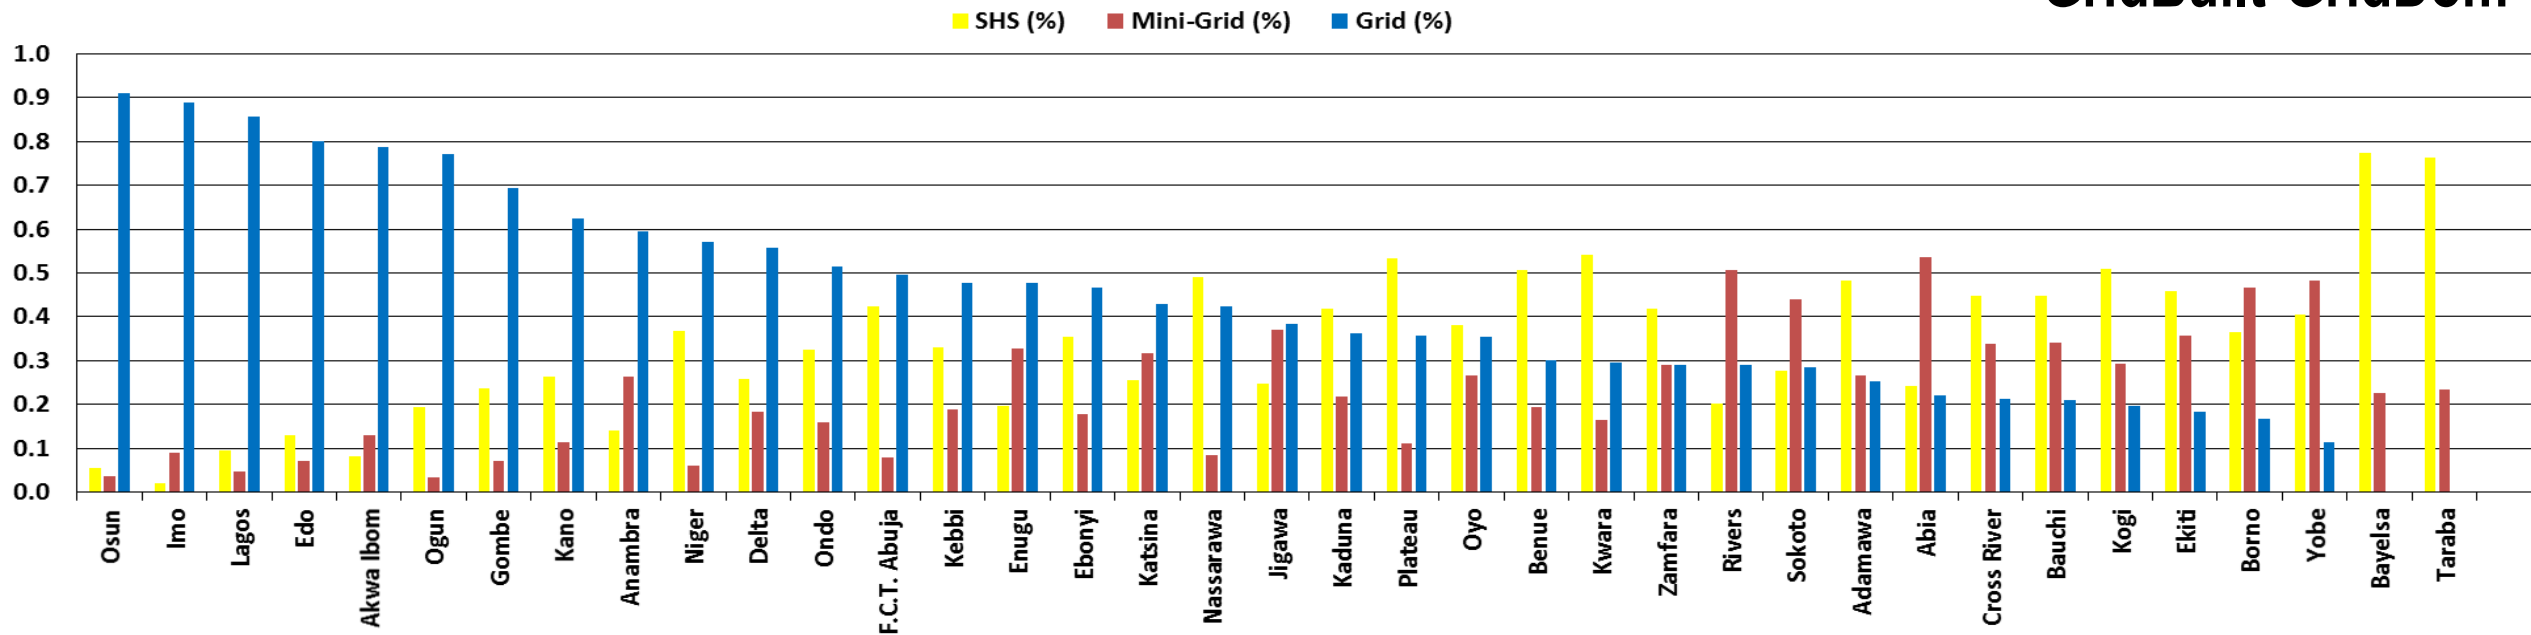

Share of electrification options in all Nigerian states

GridBuilt-SHSDom

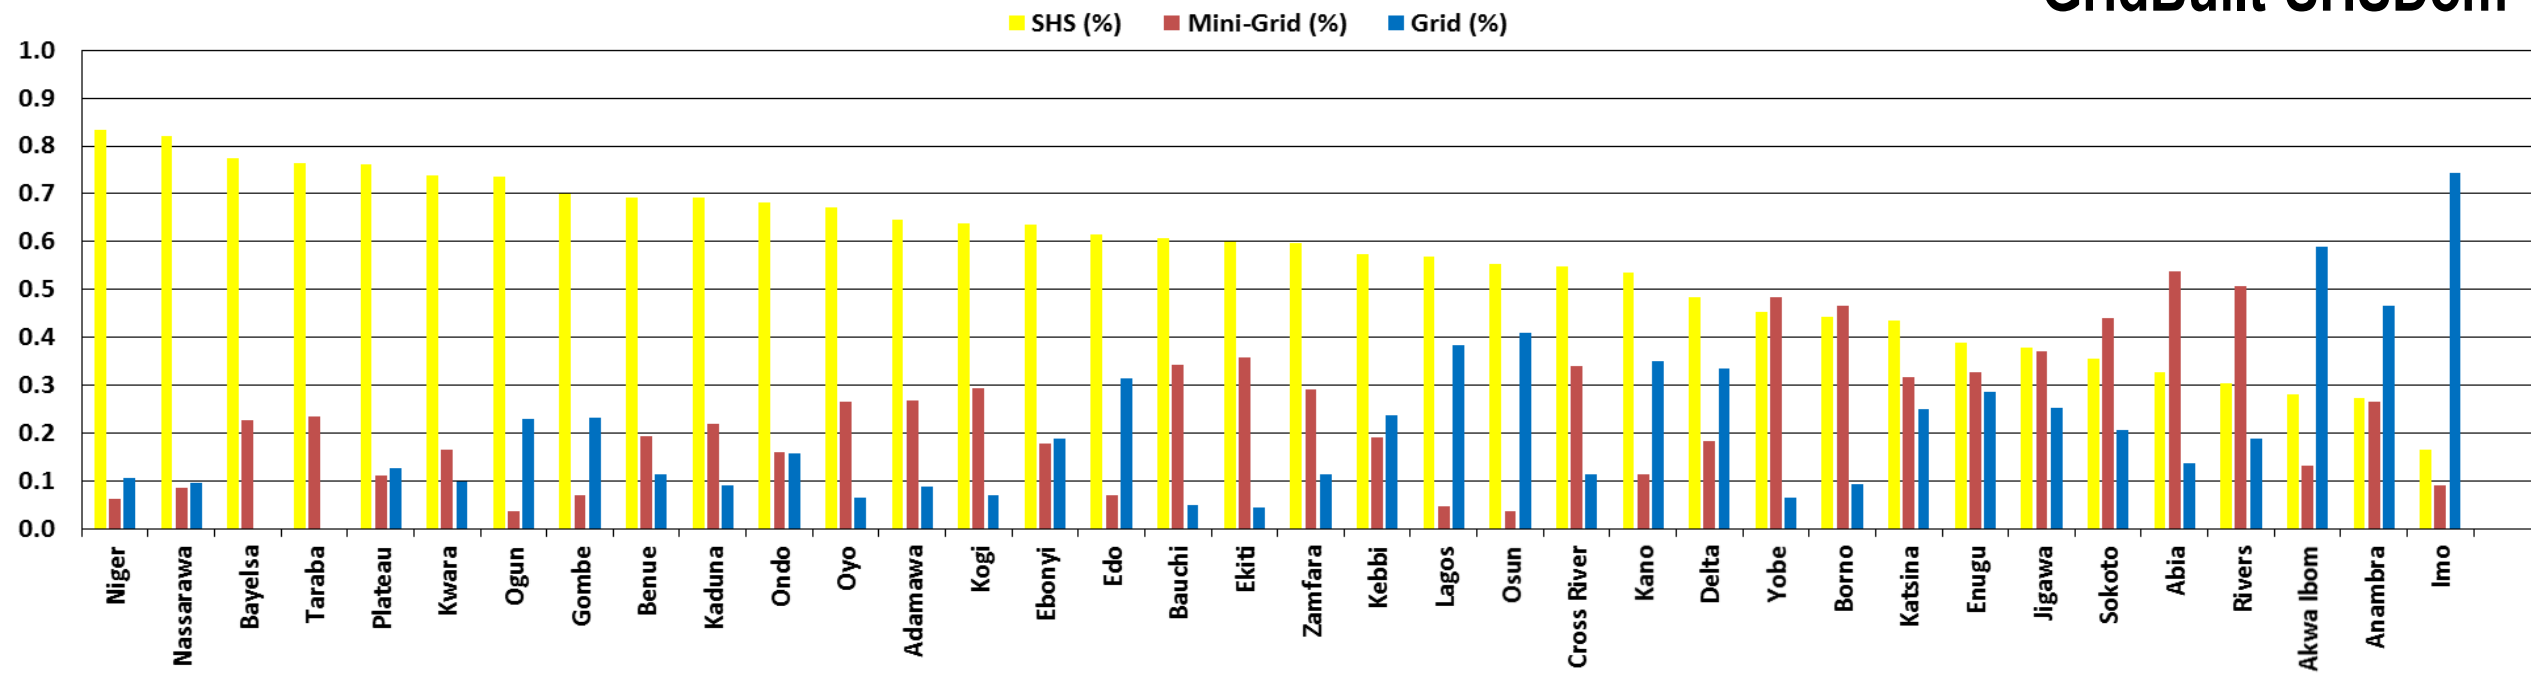

# Electrification option in all Nigerian states: GridPlanned-GridDom

## Electrification options of Nigerian states

Electrification option

- Solar Home System
- Mini-Grid
- Grid Extension

Ocean, River and Lake

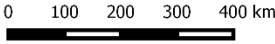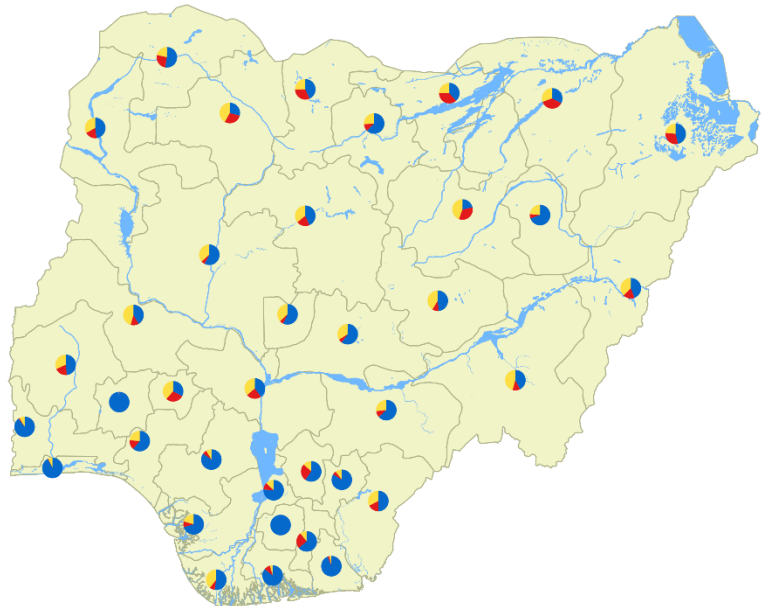

## Electrification options of Nigerian states

Electrification option

- Solar Home System
- Mini-Grid
- Grid Extension

Grid Buffer (diameter)

- 50 km
- Power Grid
- Ocean, River and Lake

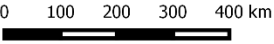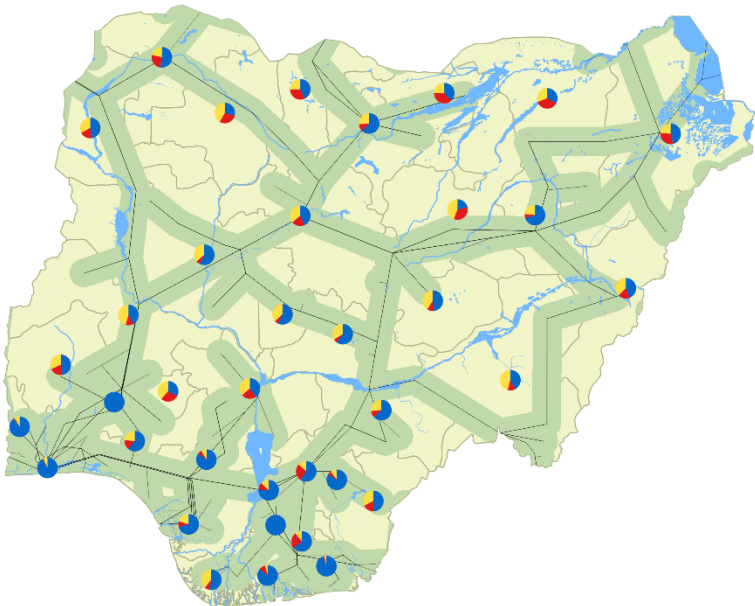

# Electrification option in all Nigerian states: GridPlanned-SHSDom

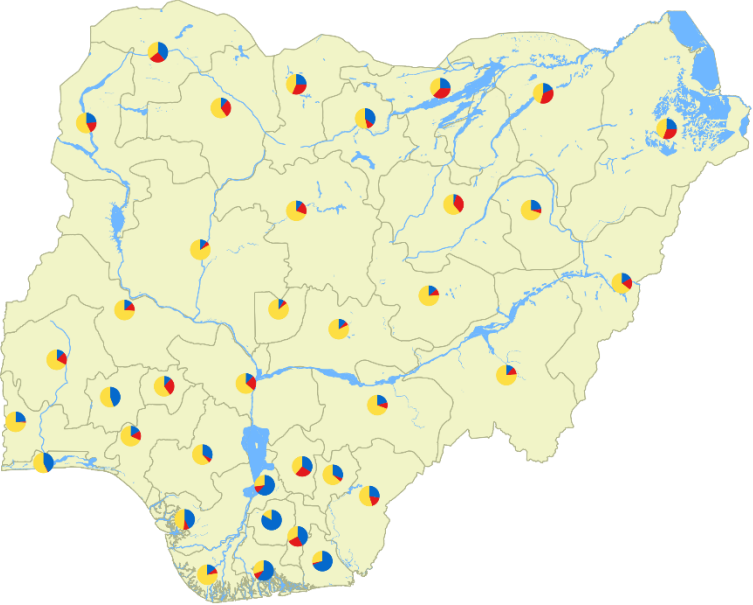

**Electrification options of Nigerian states**

Electrification option

- Solar Home System
- Mini-Grid
- Grid Extension

Ocean, River and Lake

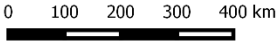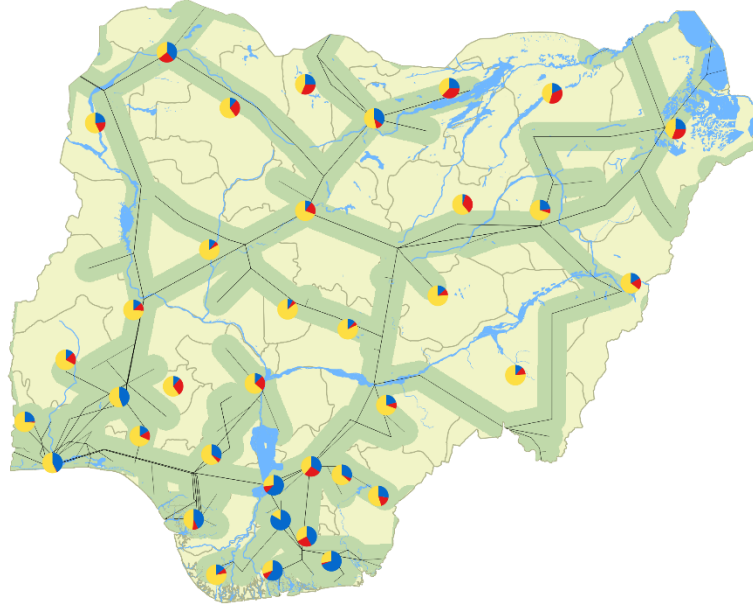

**Electrification options of Nigerian states**

Electrification option

- Solar Home System
- Mini-Grid
- Grid Extension

Grid Buffer (diameter)

- 50 km
- Power Grid
- Ocean, River and Lake

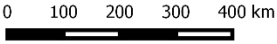

# Electrification option: GridPlanned-SHSDom

**Electrification options of Nigerian states**

- Electrification option
- Solar Home System
  - Mini-Grid
  - Grid Extension

- Power Grid
- Ocean, River and Lake

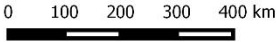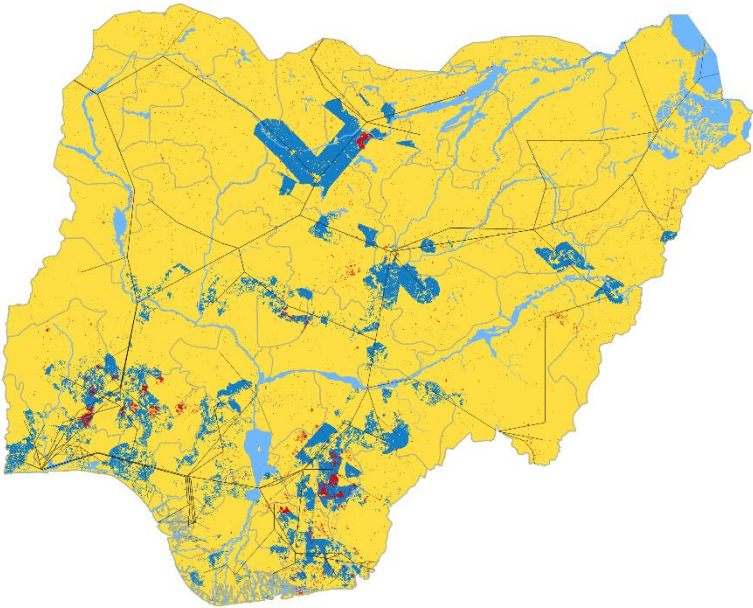

# Electrification option: GridPlanned-GridDom

**Electrification options of Nigerian states**

- Electrification option
- Solar Home System
  - Mini-Grid
  - Grid Extension

- Power Grid
- Ocean, River and Lake

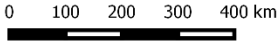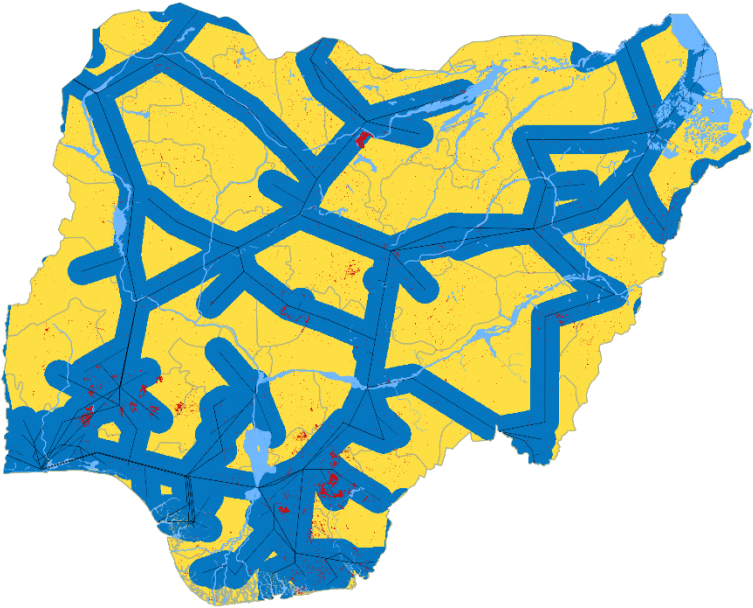

Share of electrification options in all Nigerian states

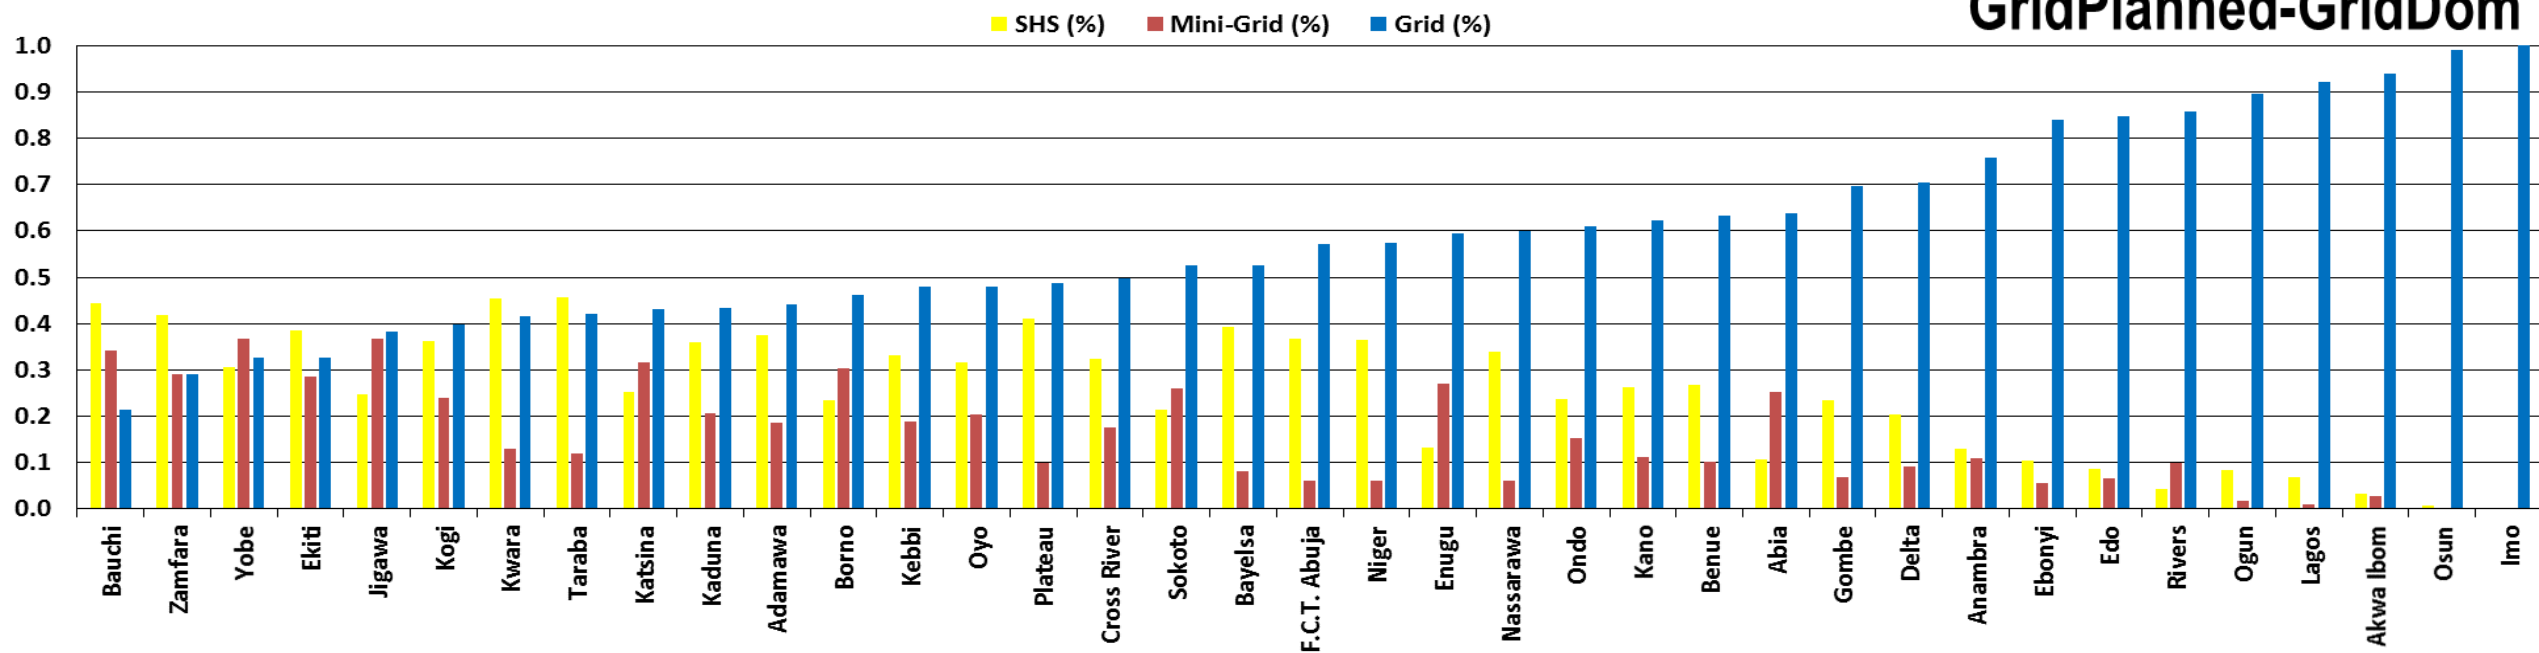

Share of electrification options in all Nigerian states

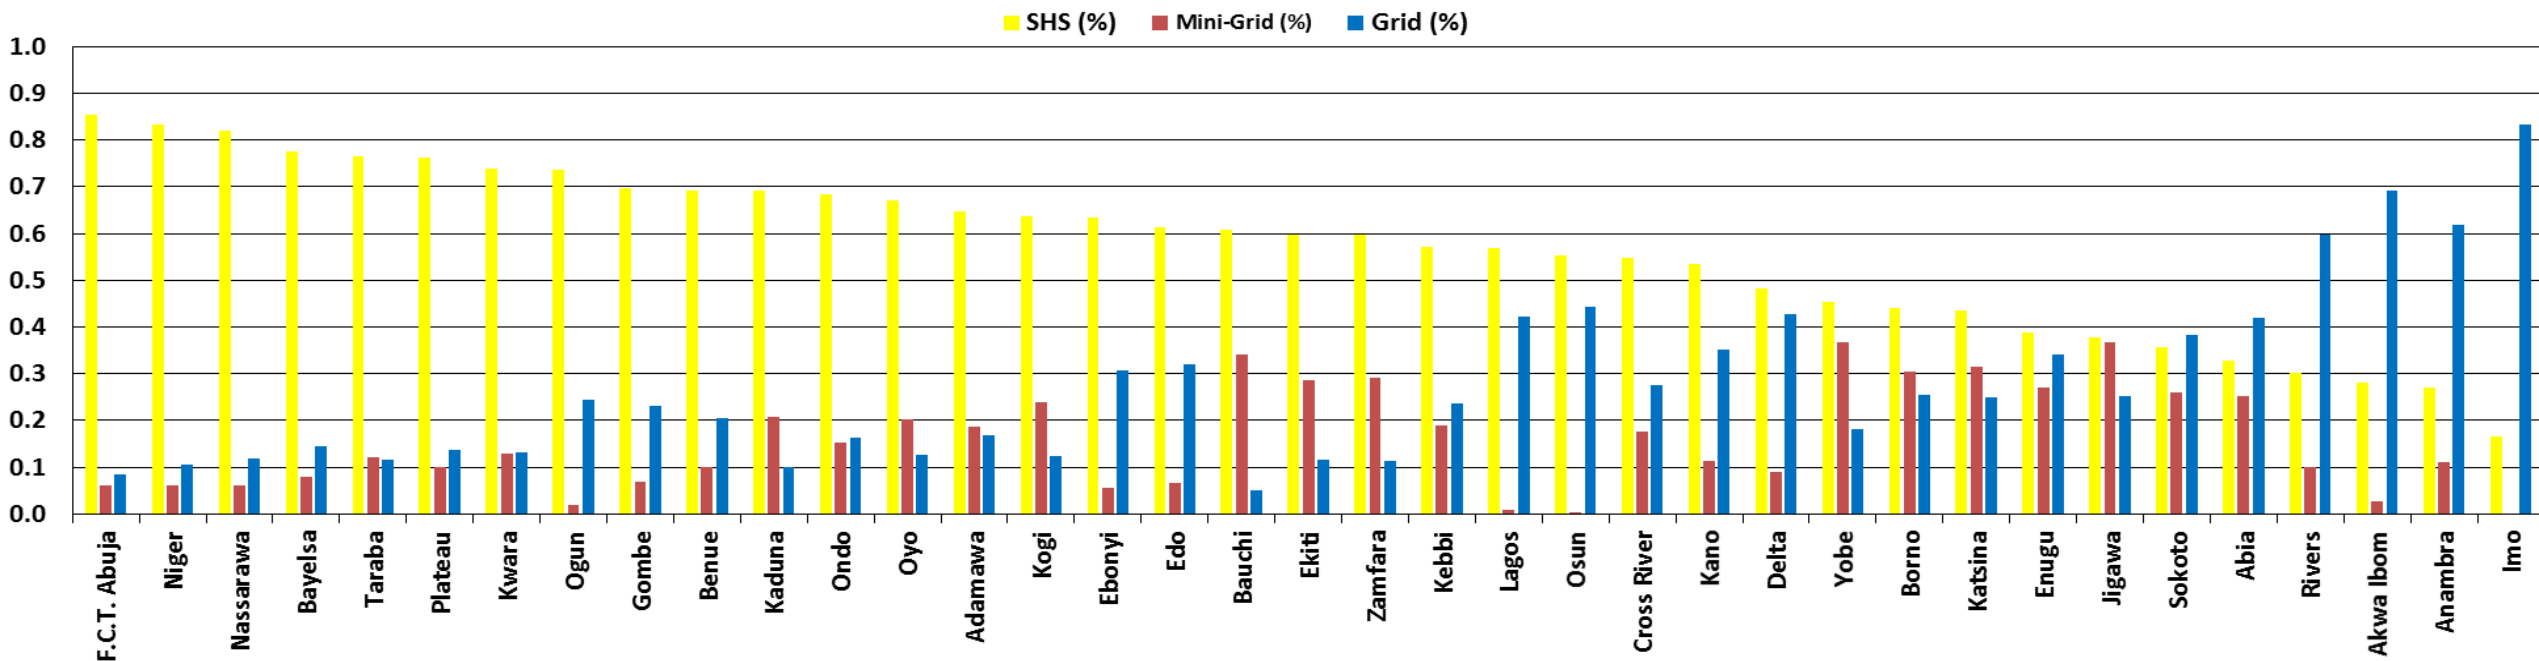

# Senegal

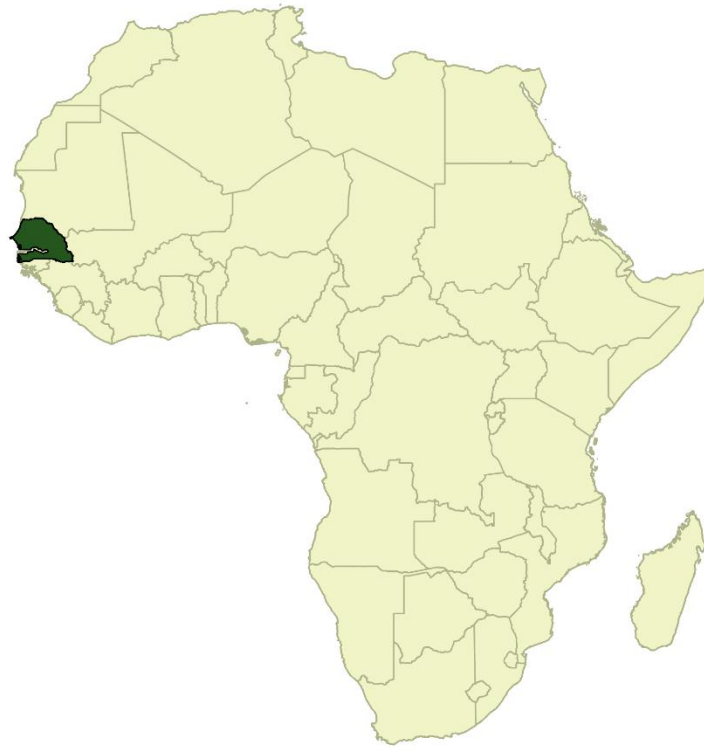

# Night light emission and Population of Senegalese regions

**Night light emission in Senegal**

Detected night lights

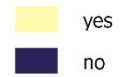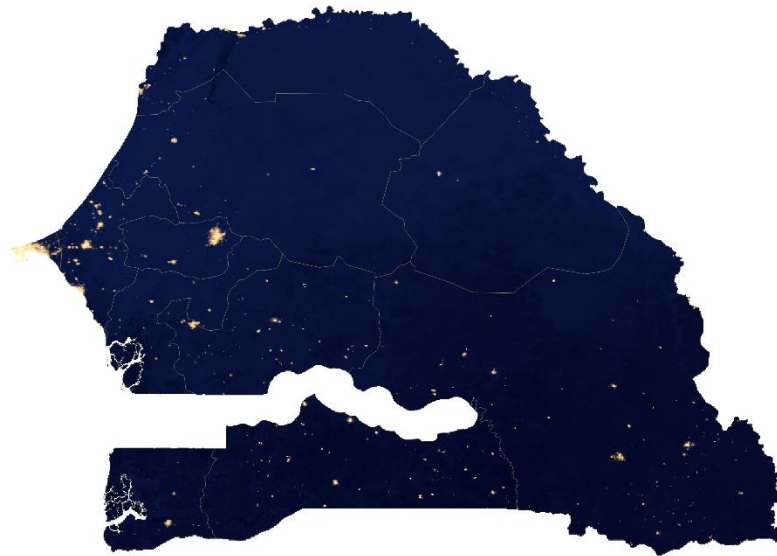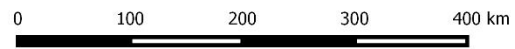

**Population structure of Senegal**

Population density (people/750x750m<sup>2</sup>)

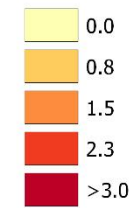

River and Lake

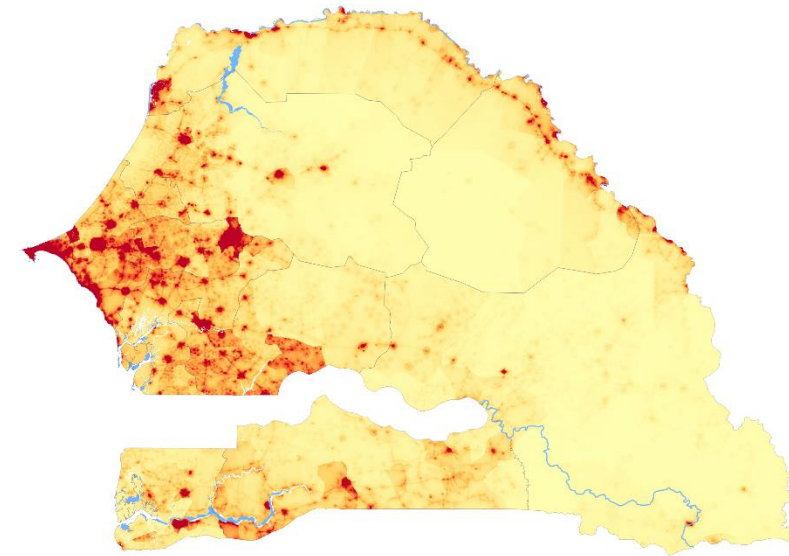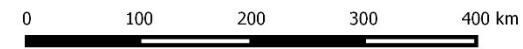

# Electrification option in all Senegalese regions: GridBuilt-GridDom

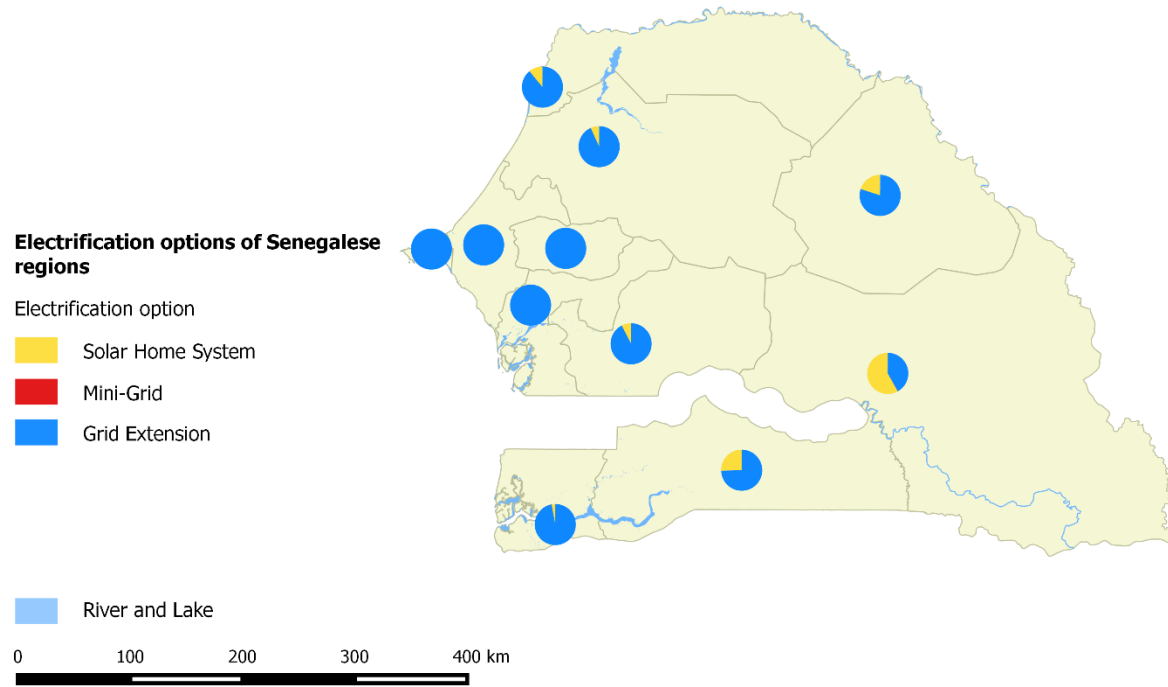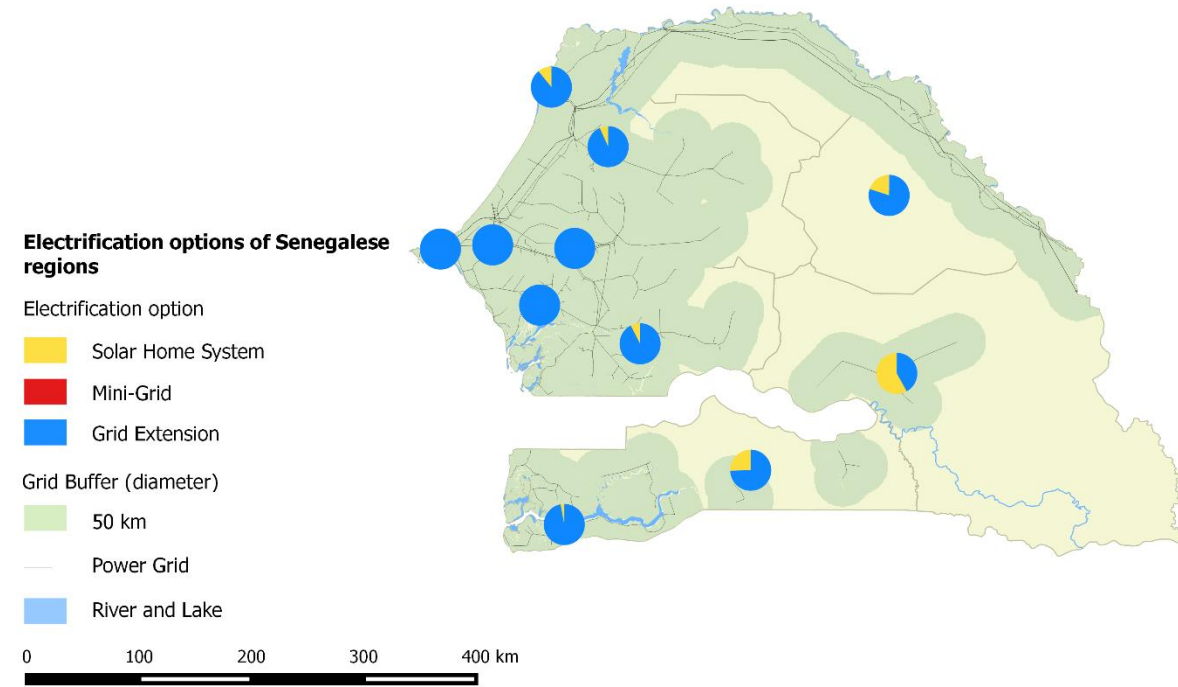

# Electrification option in all Senegalese regions: GridBuilt-SHSDom

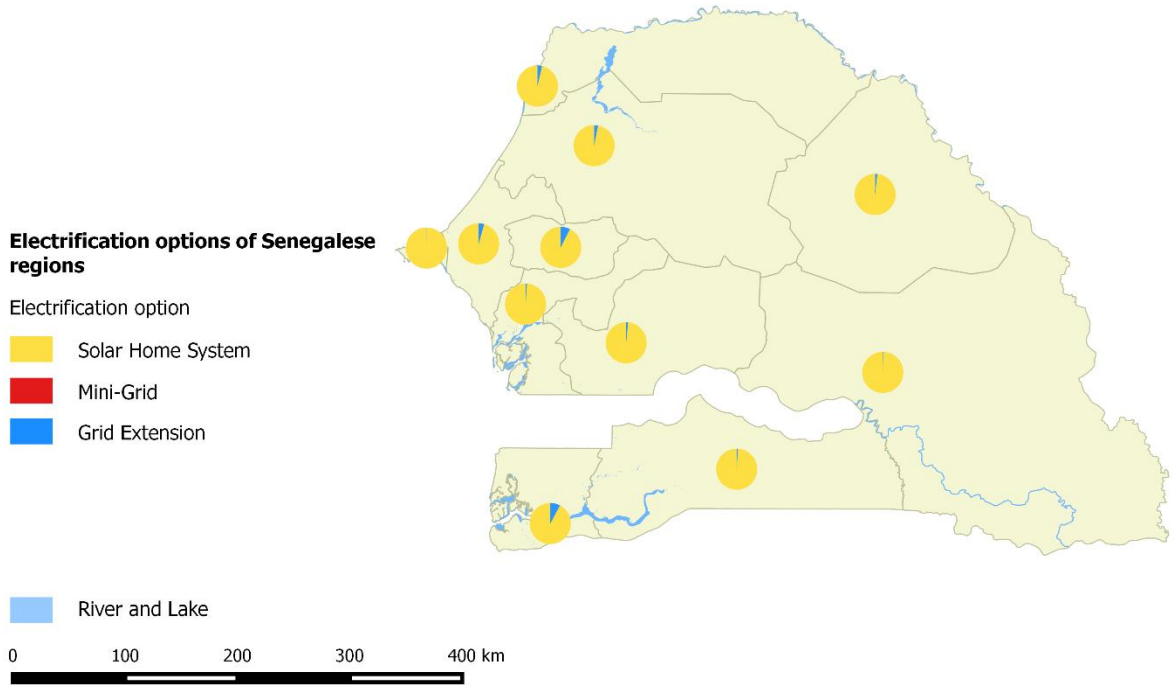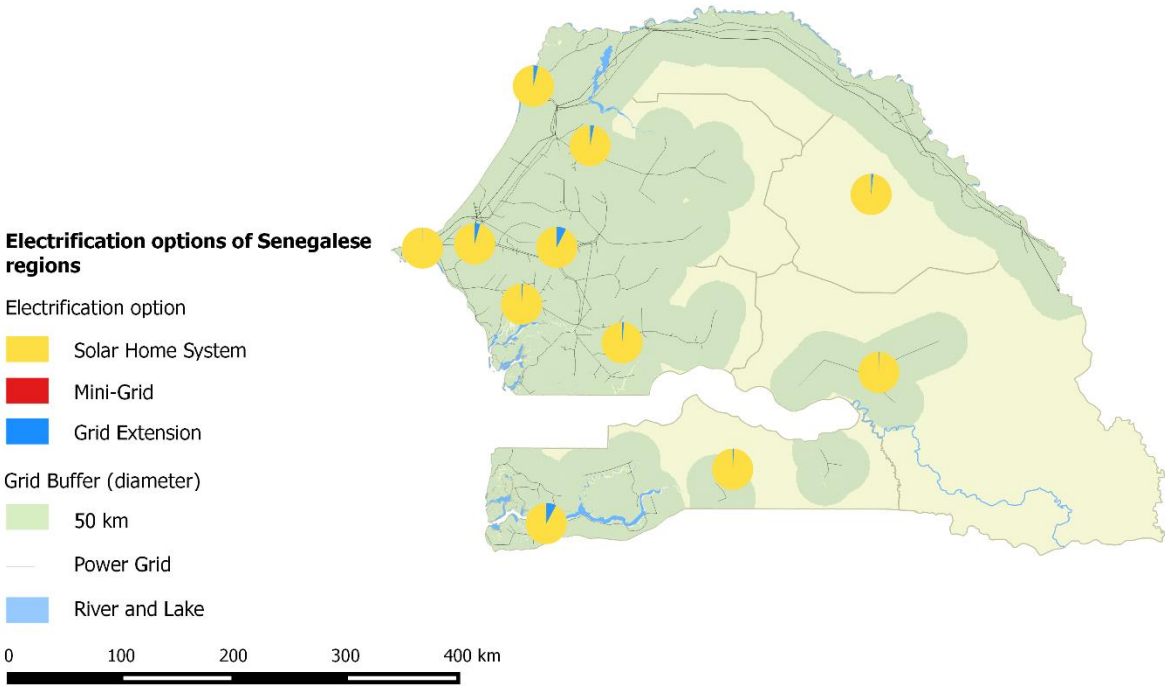

# Electrification option: GridBuilt-SHSDom

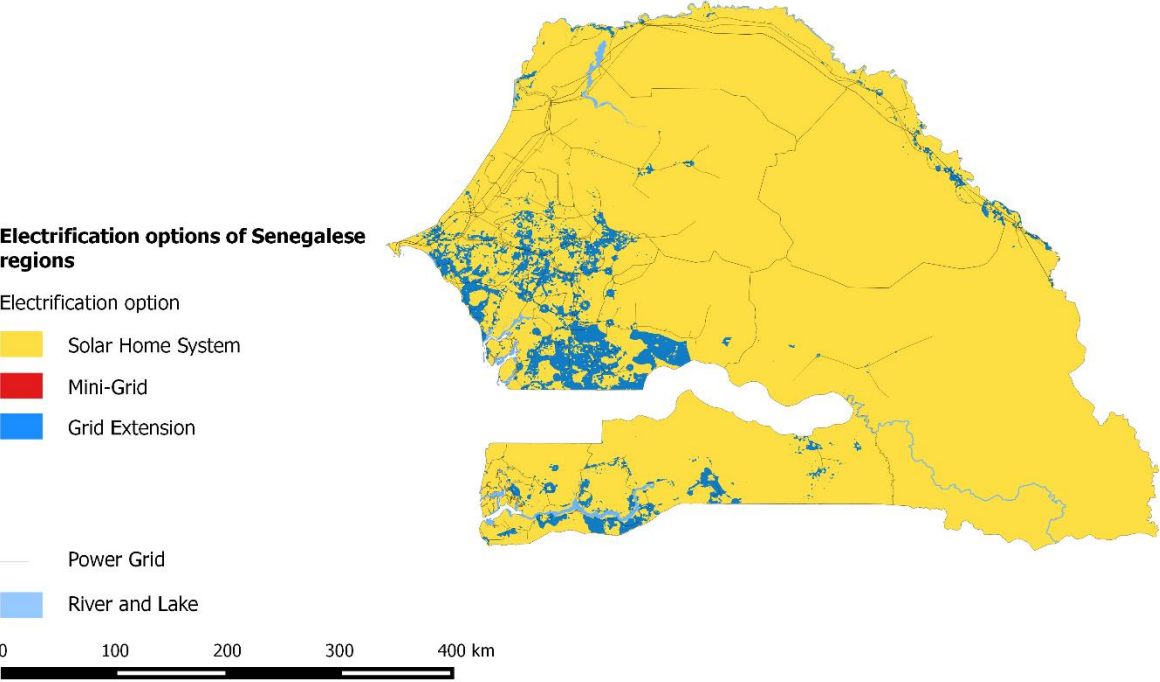

# Electrification option: GridBuilt-GridDom

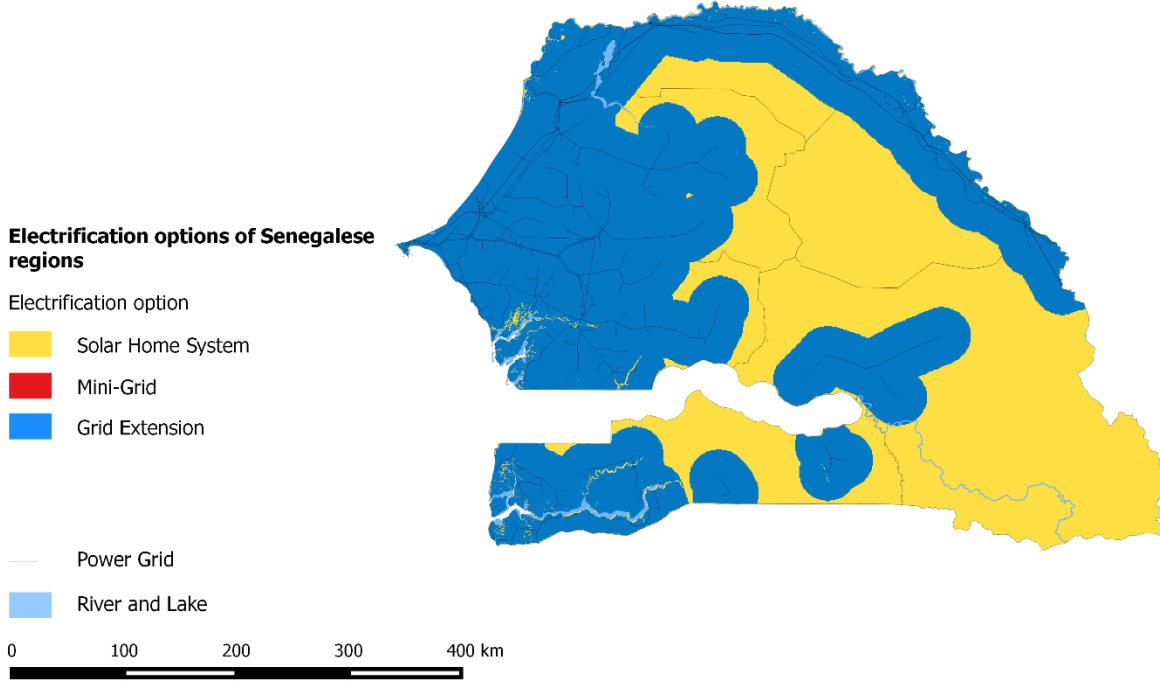

Share of electrification options in all Senegalese regions

SHS (%) Mini-Grid (%) Grid (%)

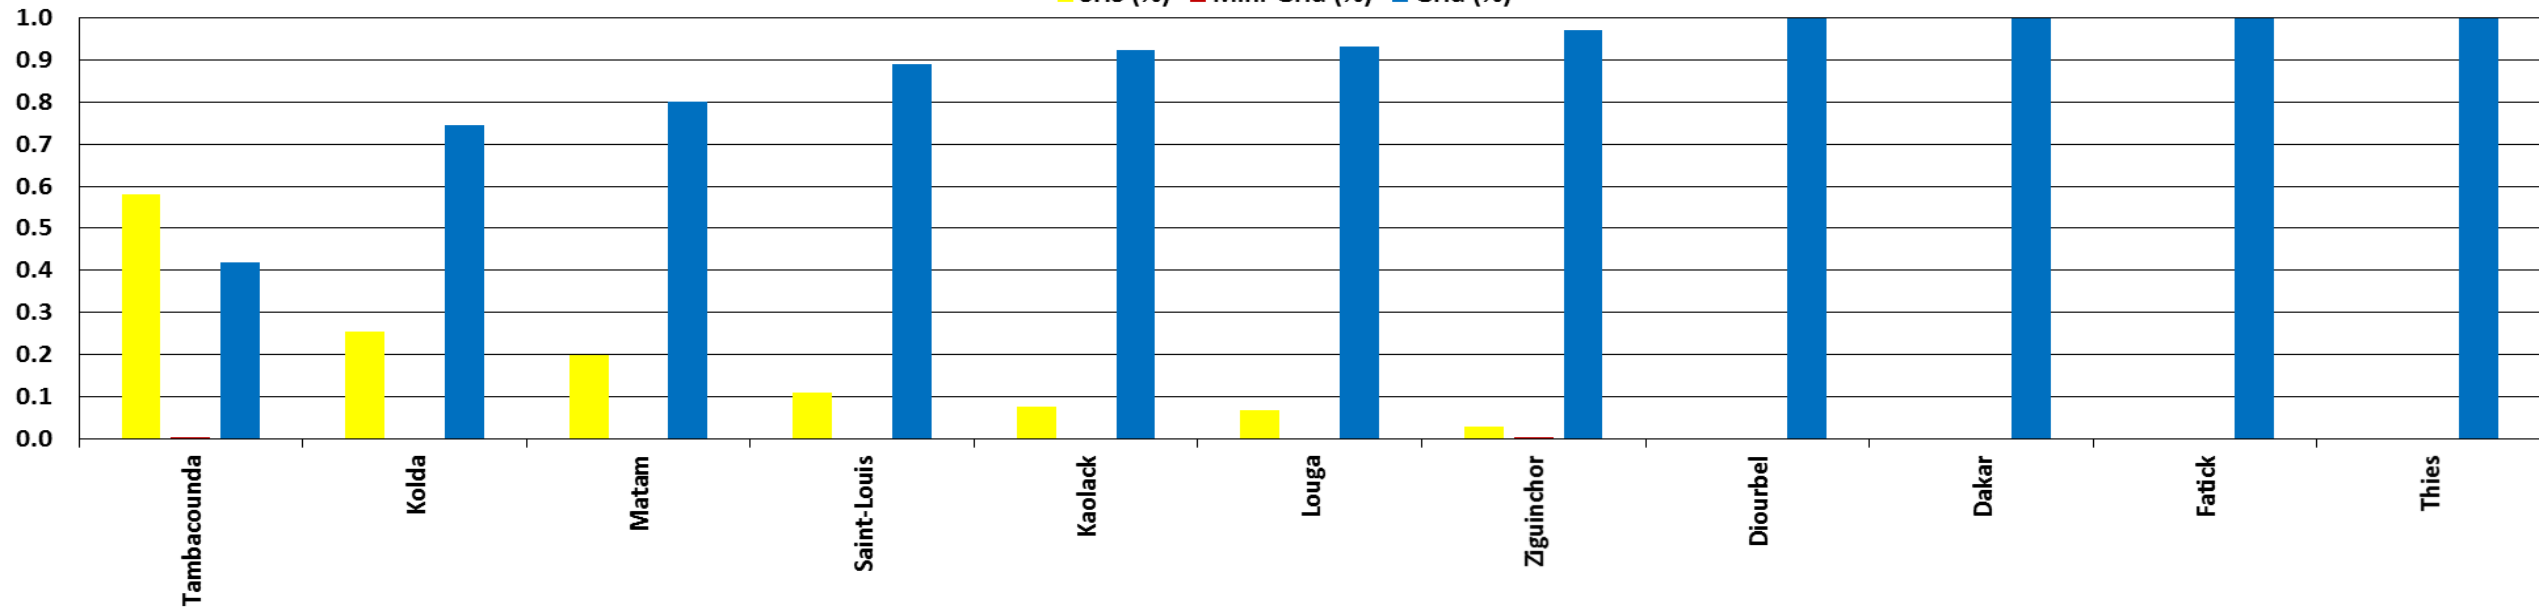

GridBuilt-GridDom

Share of electrification options in all Senegalese regions

SHS (%) Mini-Grid (%) Grid (%)

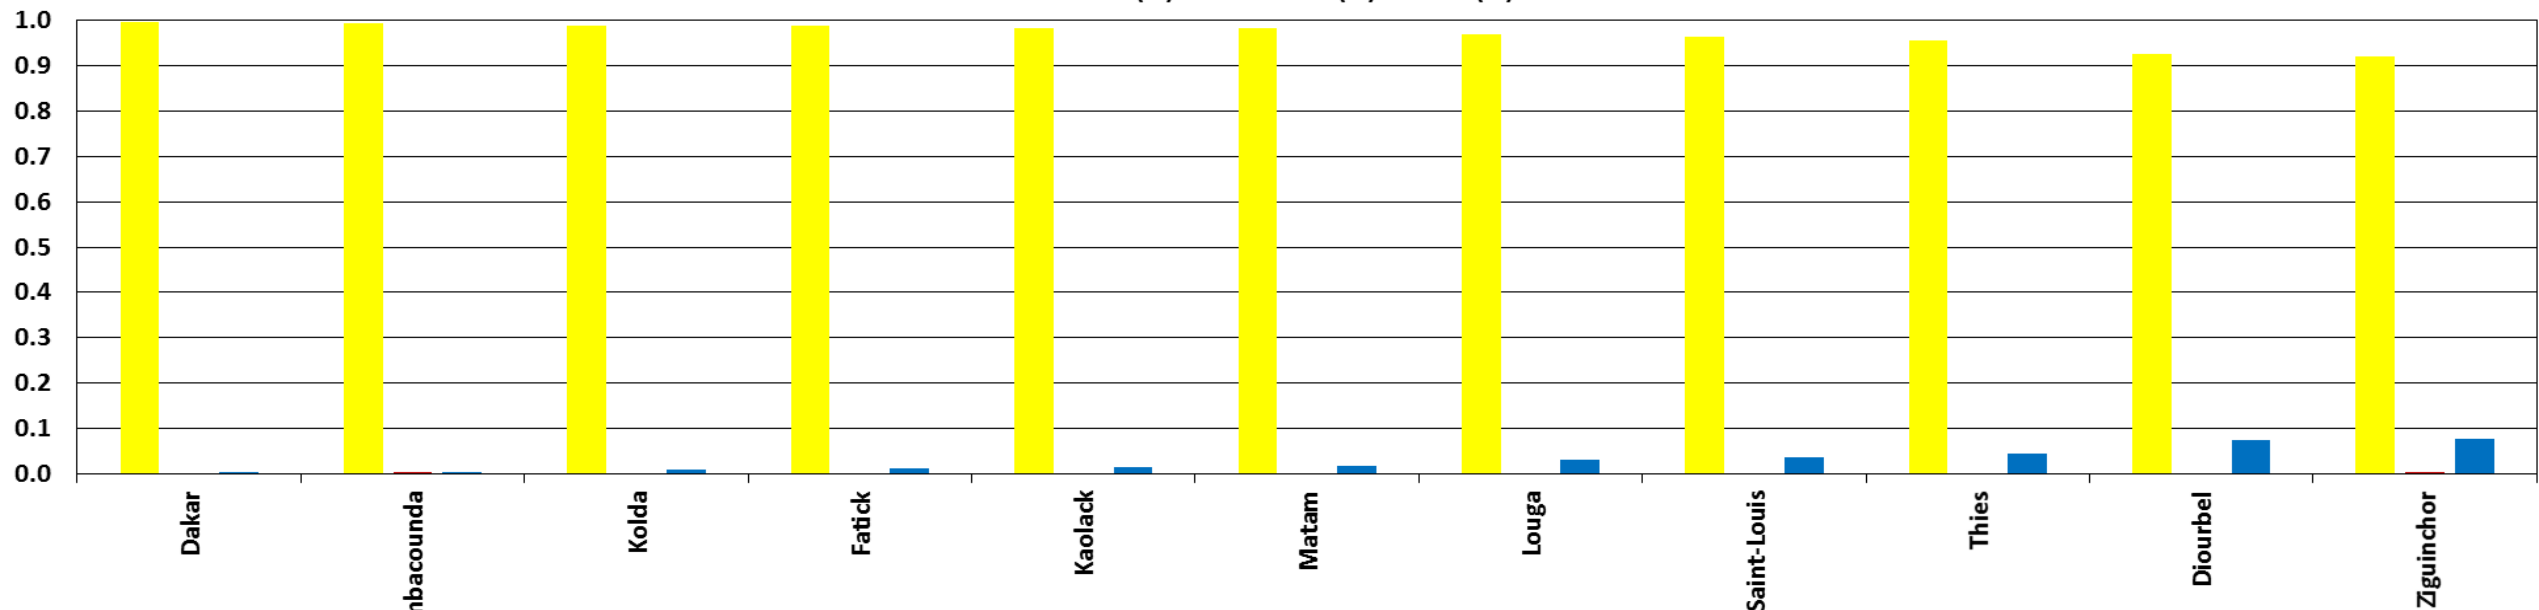

GridBuilt-SHSDom

# Electrification option in all Senegalese regions: GridPlanned-GridDom

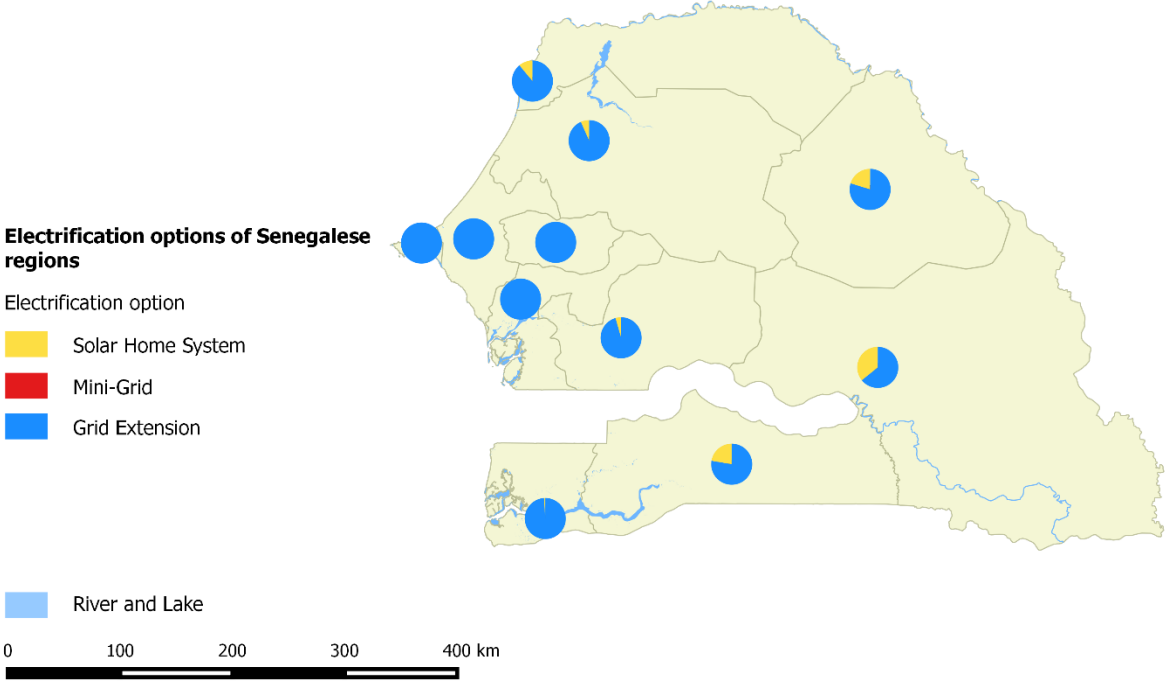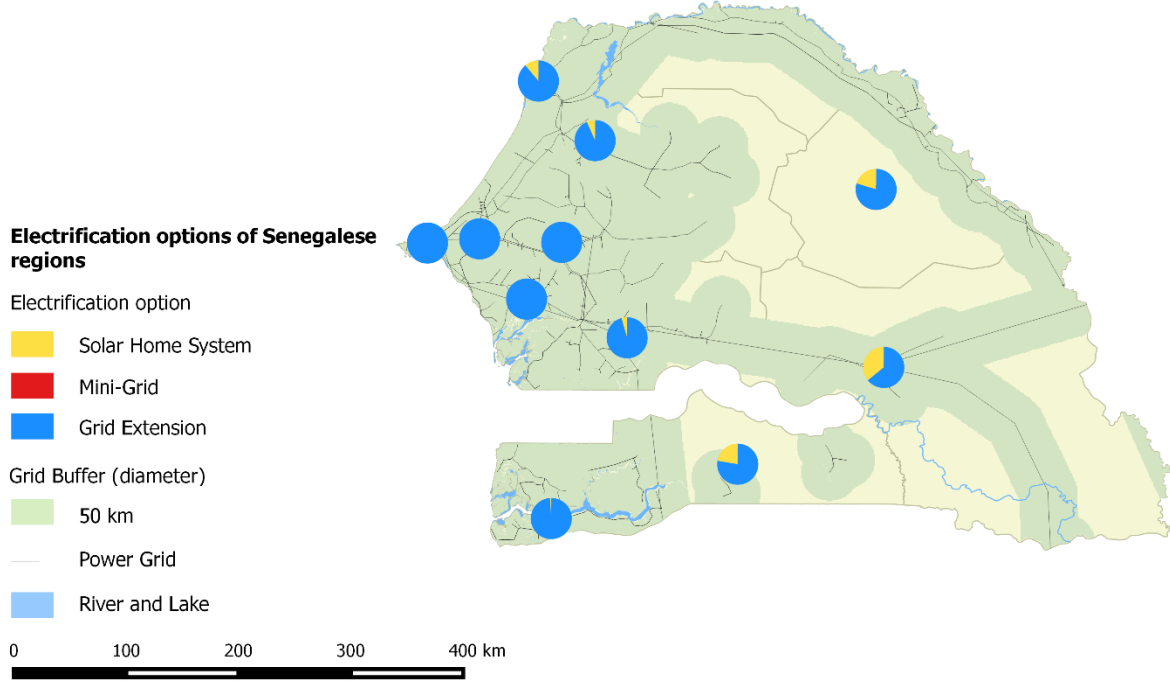

# Electrification option in all Senegalese regions: GridPlanned-SHSDom

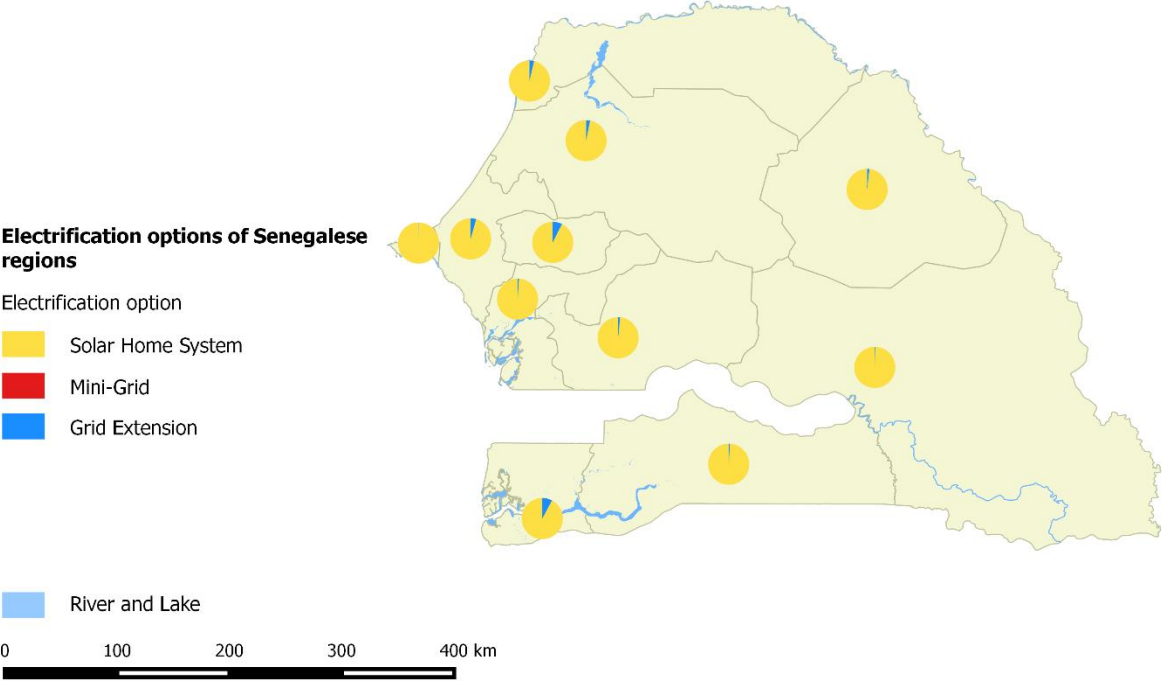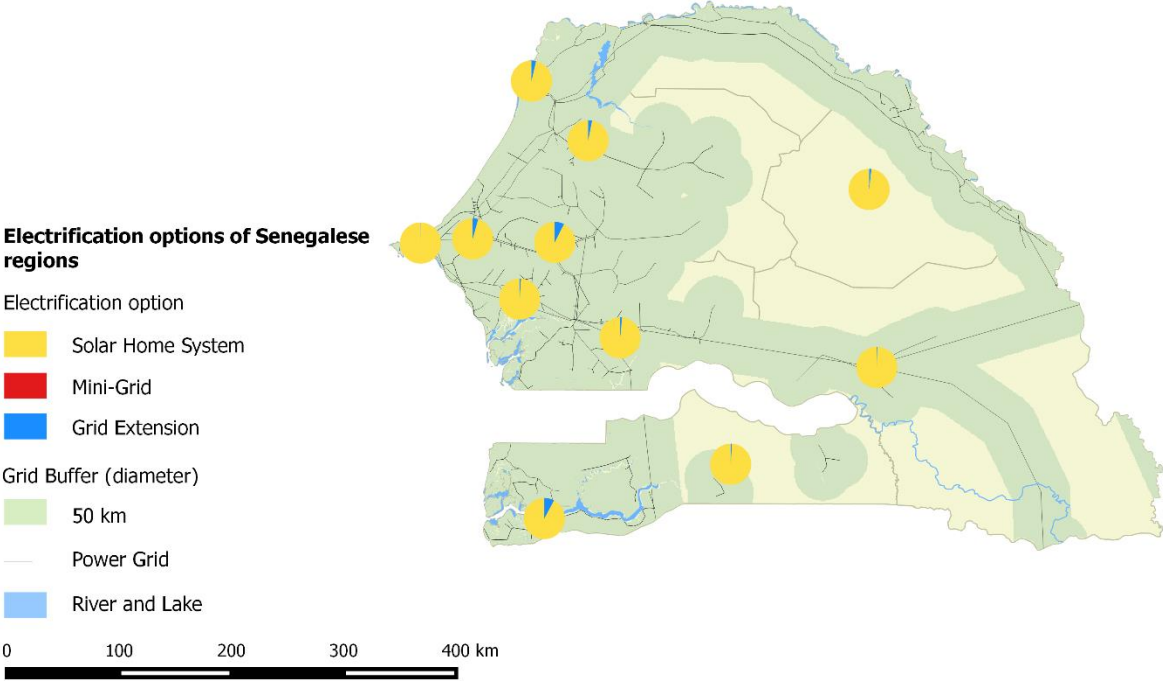

# Electrification option: GridPlanned-SHSDom

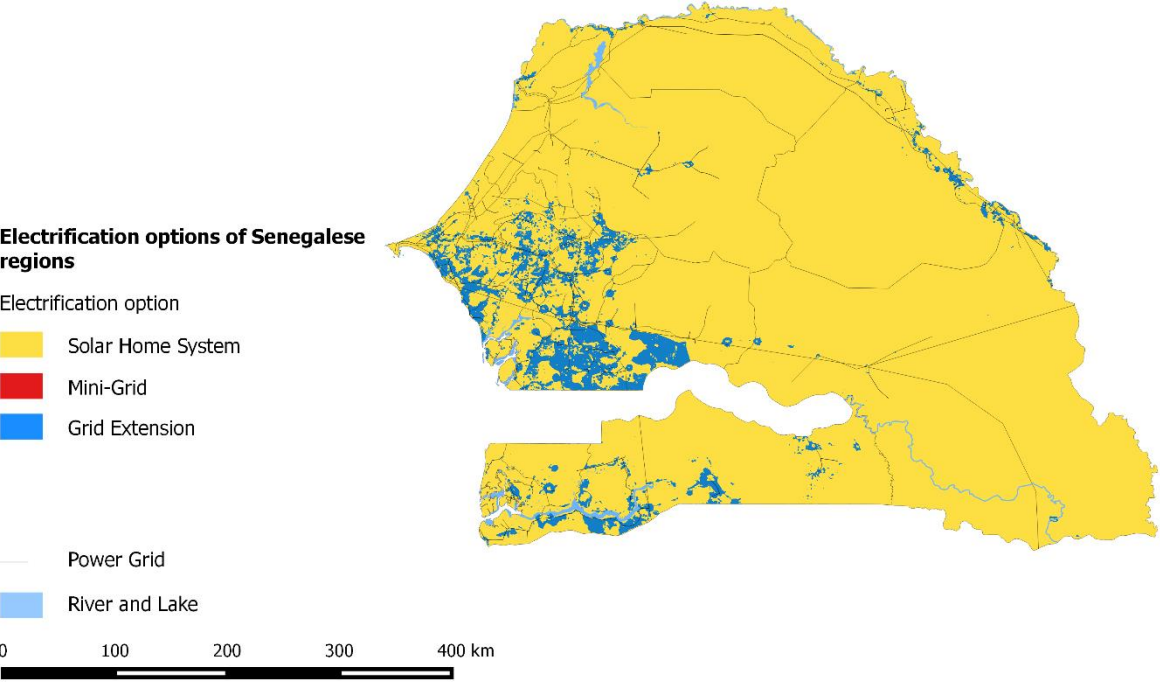

# Electrification option: GridPlanned-GridDom

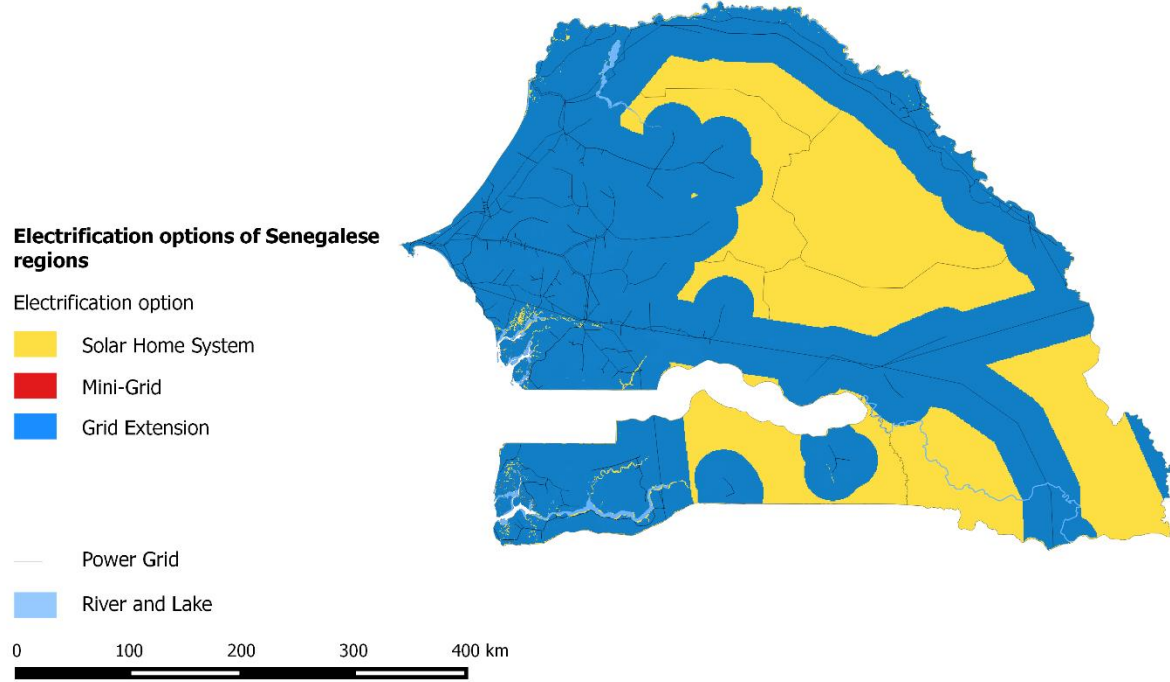

Share of electrification options in all Senegalese regions

SHS (%) Mini-Grid (%) Grid (%)

GridPlanned-GridDom

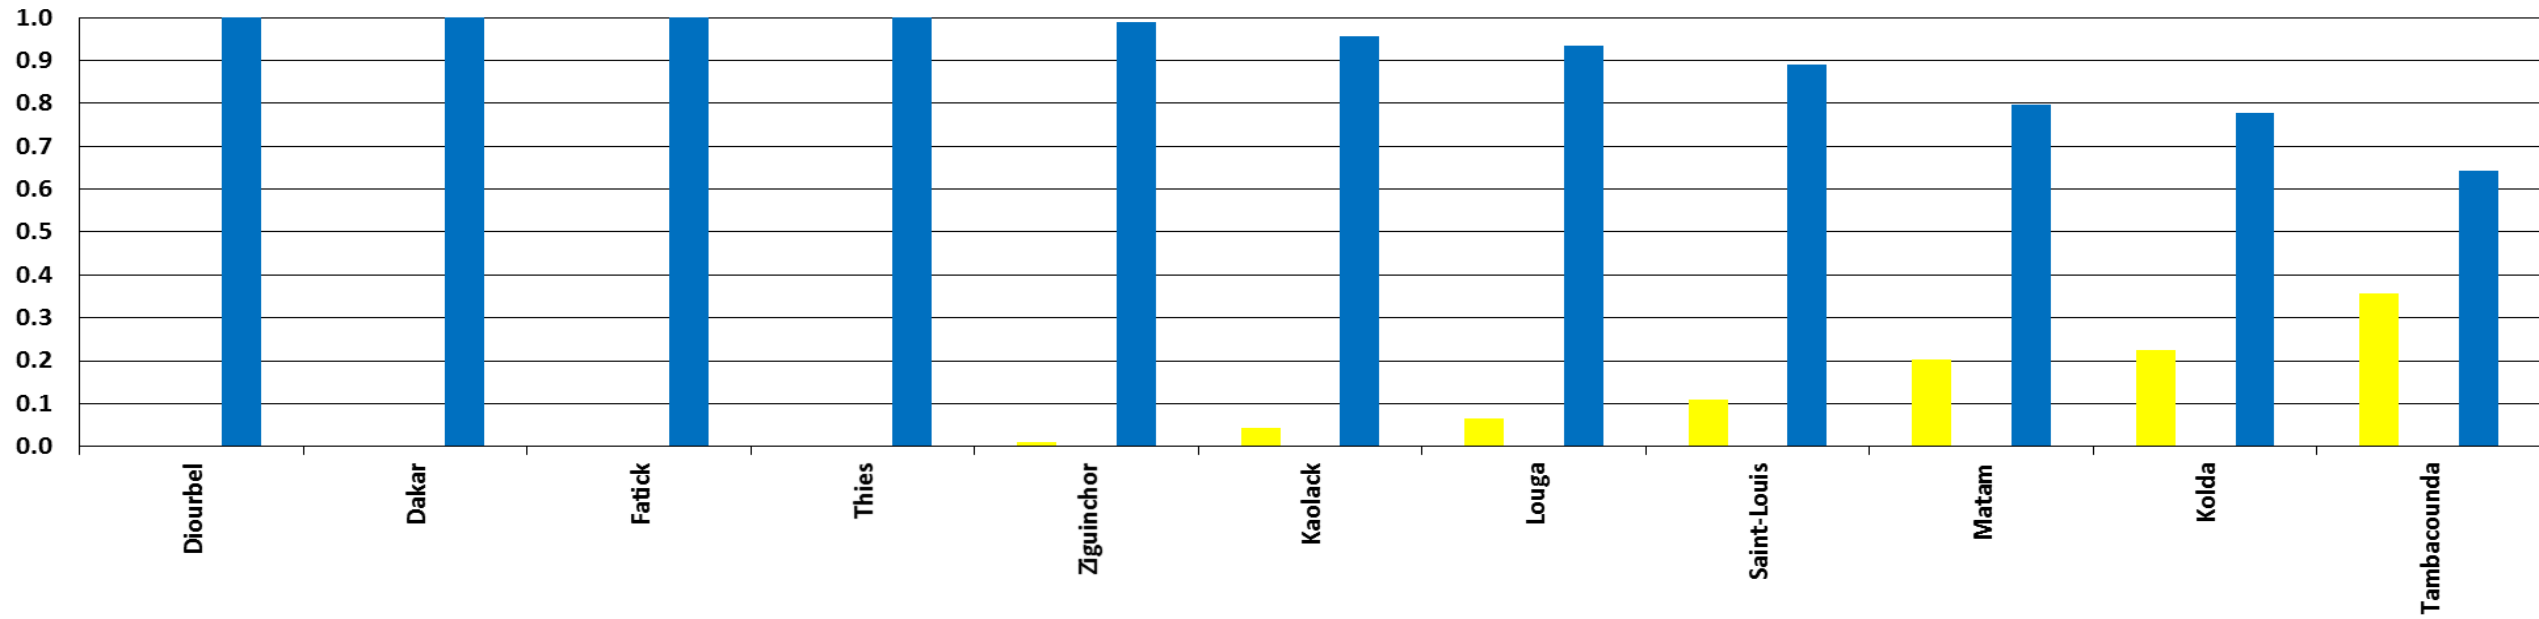

Share of electrification options in all Senegalese regions

SHS (%) Mini-Grid (%) Grid (%)

GridPlanned-SHSDom

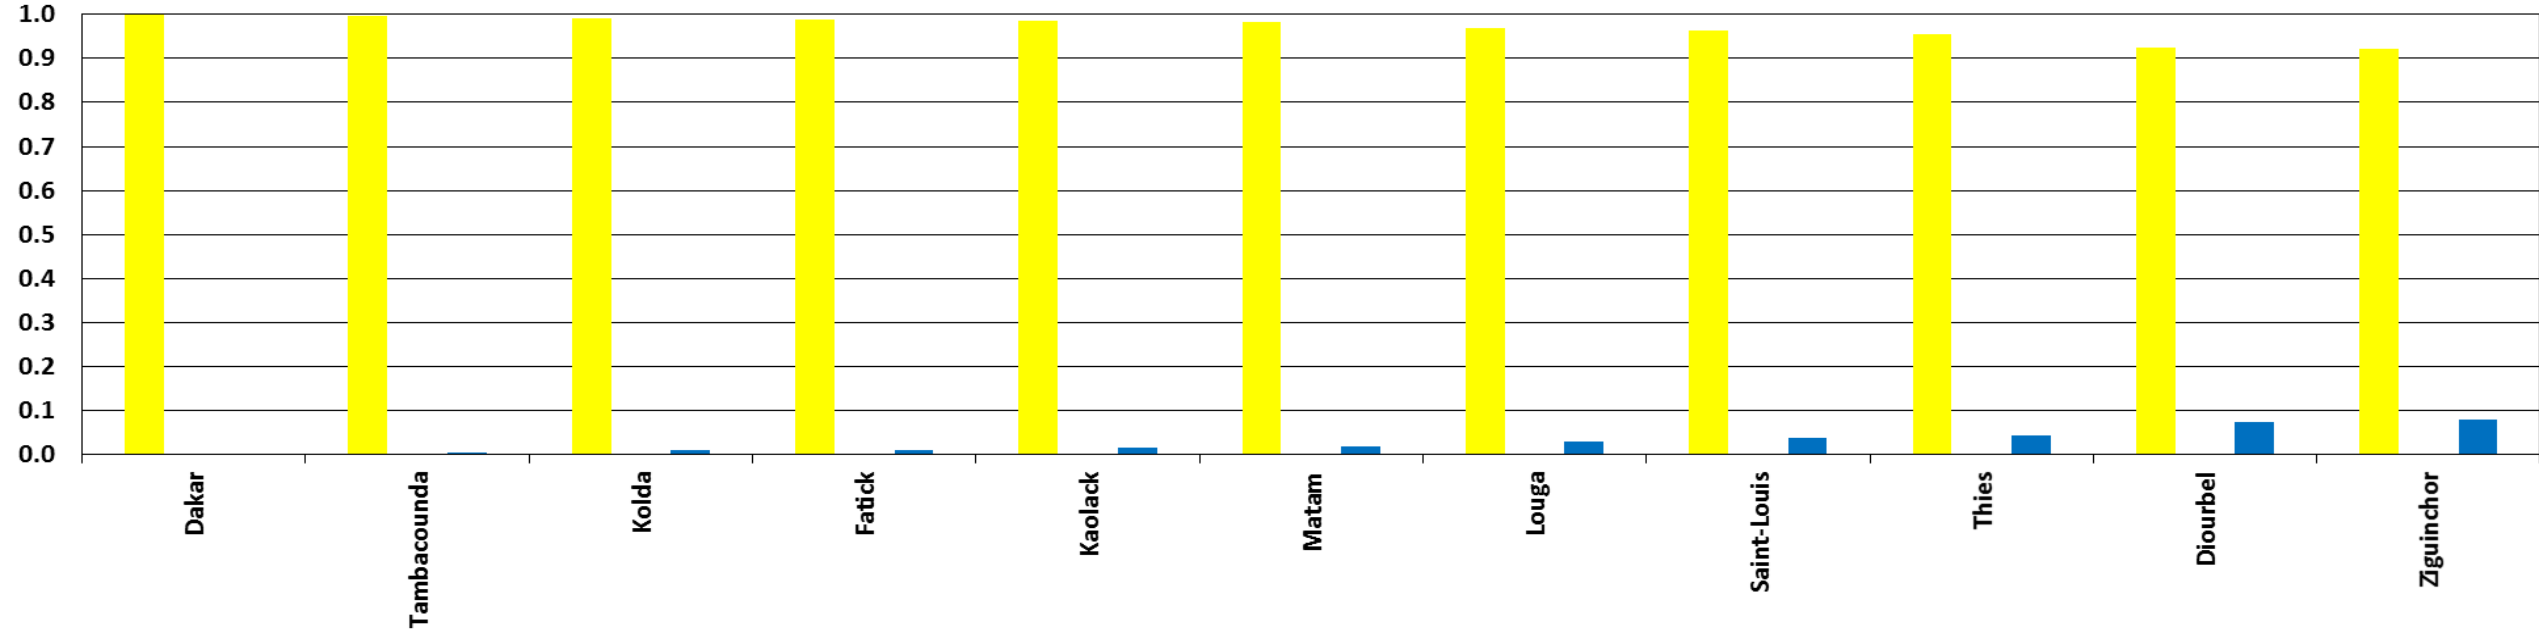

# Sierra Leone

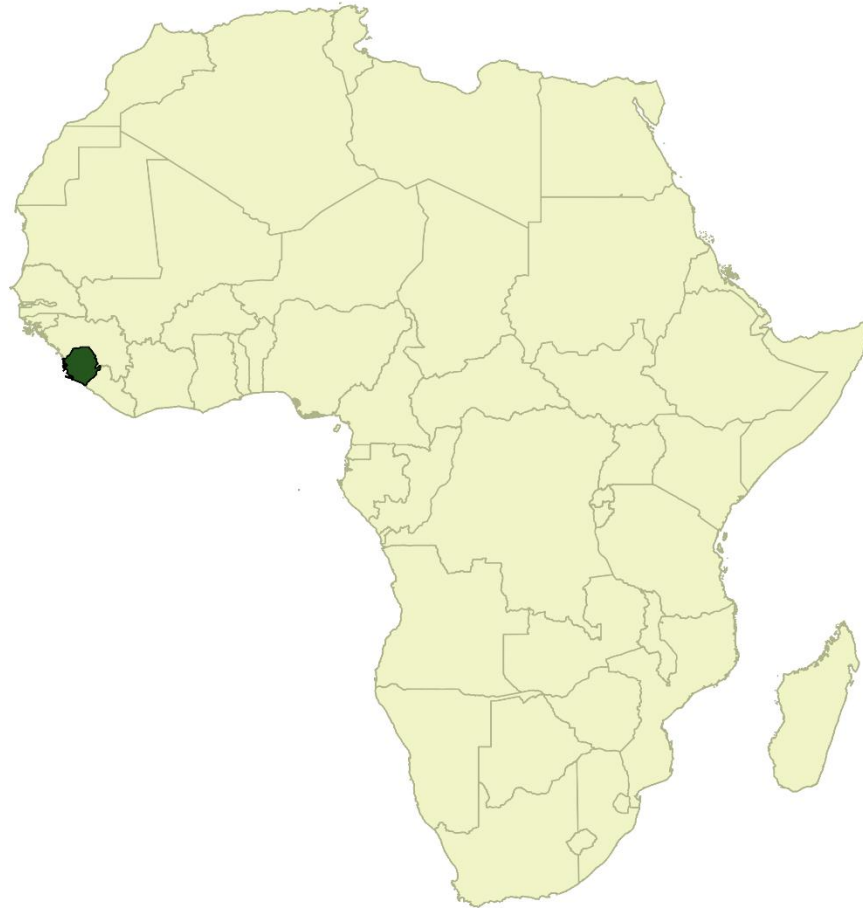

# Night light emission and Population of Sierra Leonean regions

Night light emission in Sierra Leone

Detected night lights

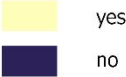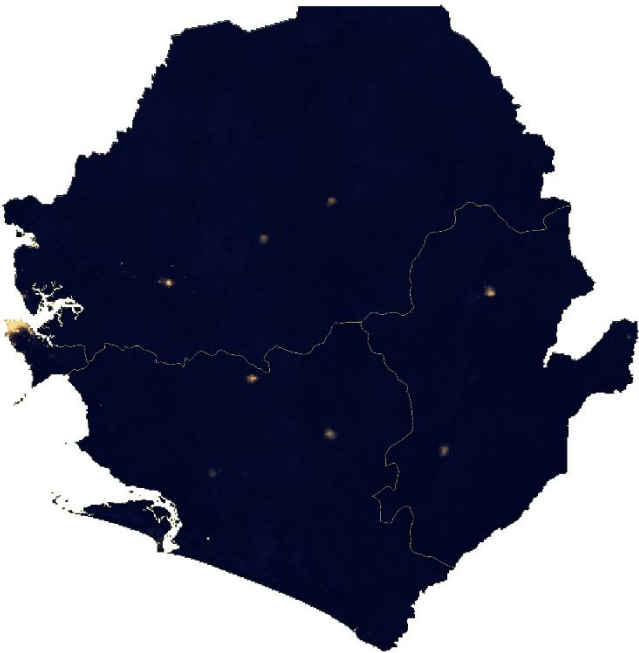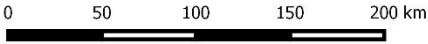

Population structure of Sierra Leone

Population density (people/750x750m<sup>2</sup>)

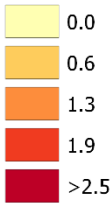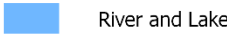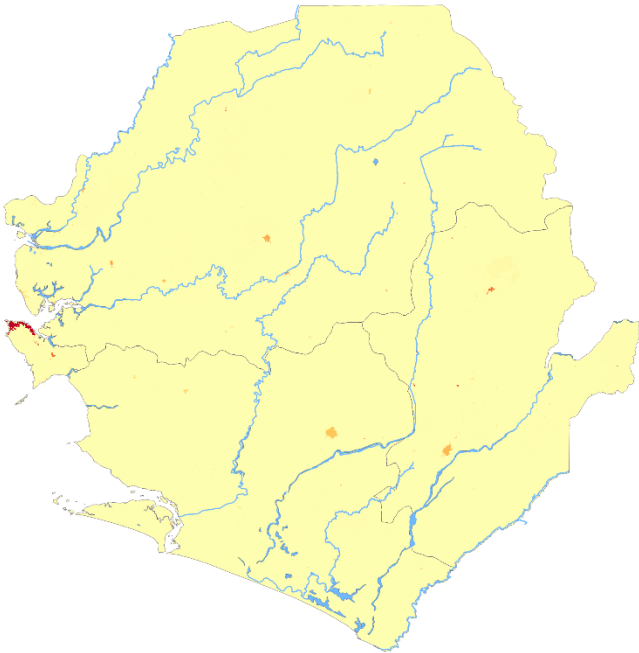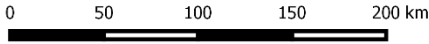

# Electrification option in all Sierra Leonean regions: GridBuilt-GridDom

Electrification options of Sierra Leonean regions

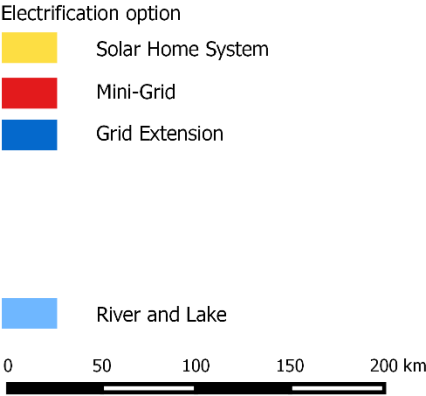

Electrification options of Sierra Leonean regions

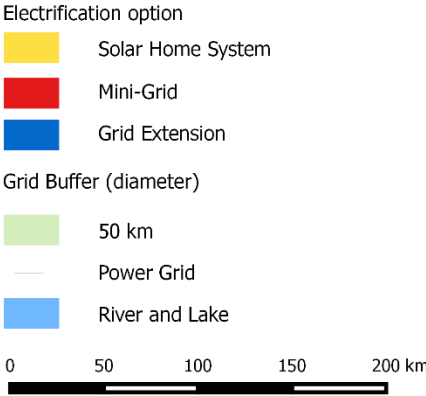

# Electrification option in all Sierra Leonean regions: GridBuilt-SHSDom

Electrification options of Sierra Leonean regions



Electrification options of Sierra Leonean regions



# Electrification option: GridBuilt-SHSDom

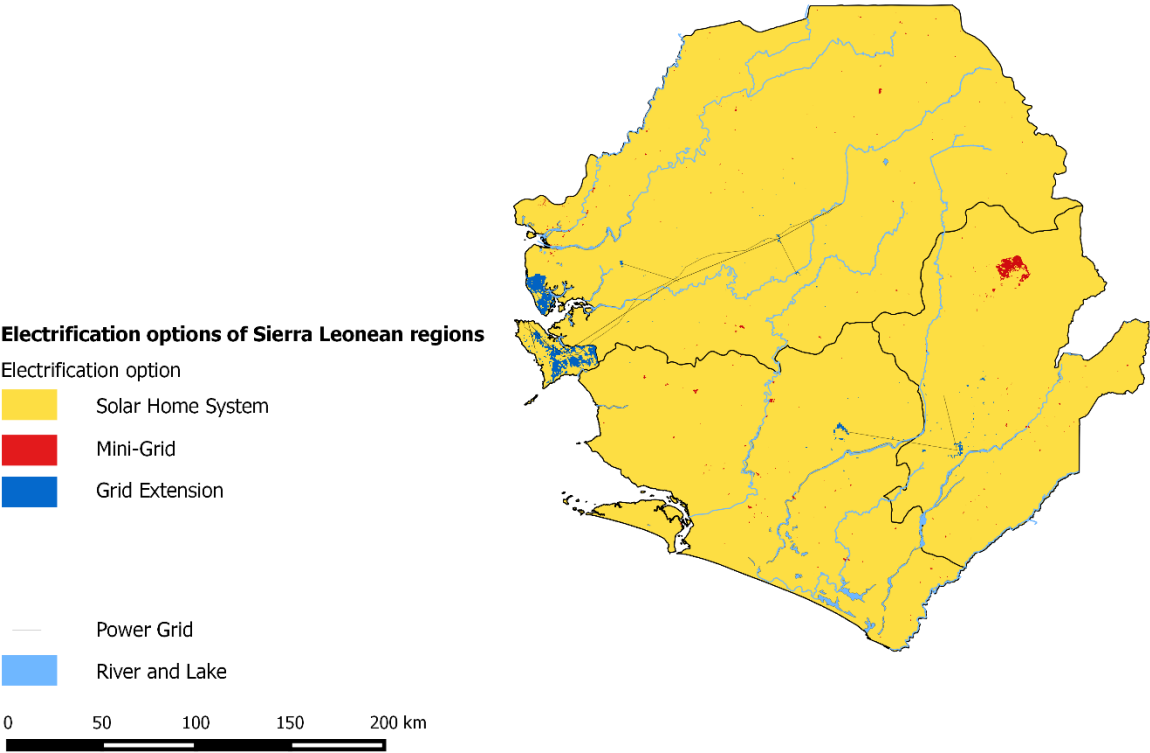

# Electrification option: GridBuilt-GridDom

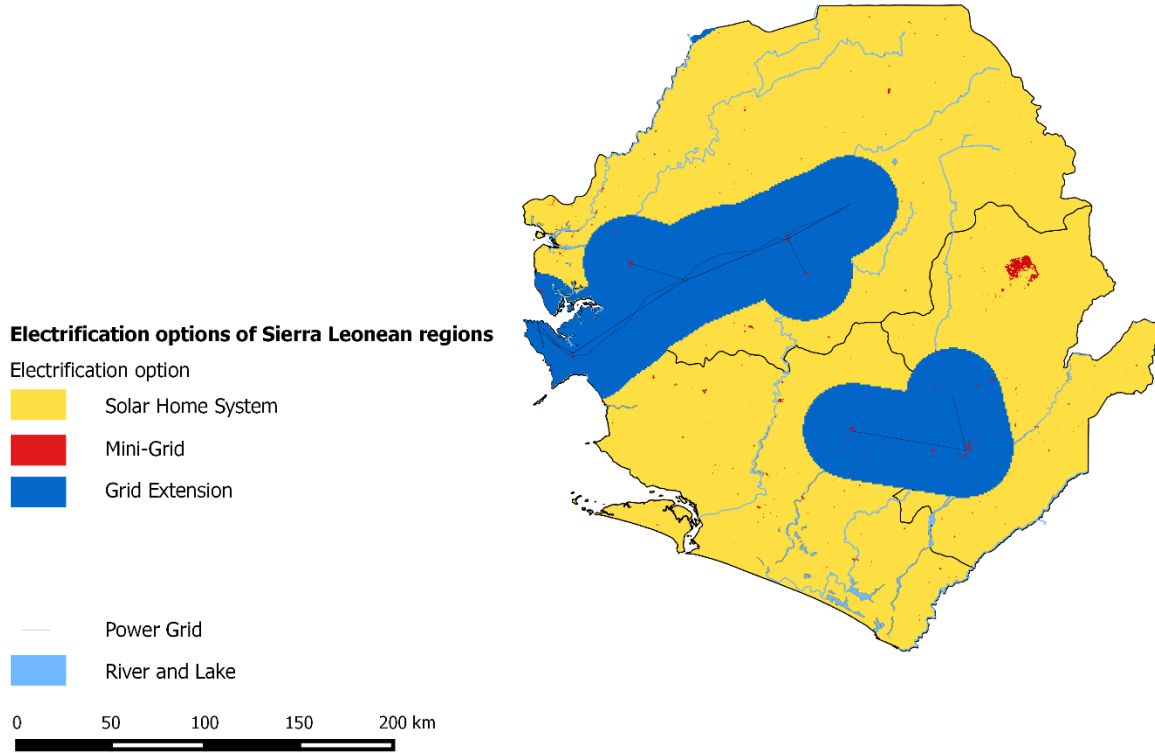

Share of electrification options in all Sierra Leonean regions

SHS (%) Mini-Grid (%) Grid (%)

GridBuilt-GridDom

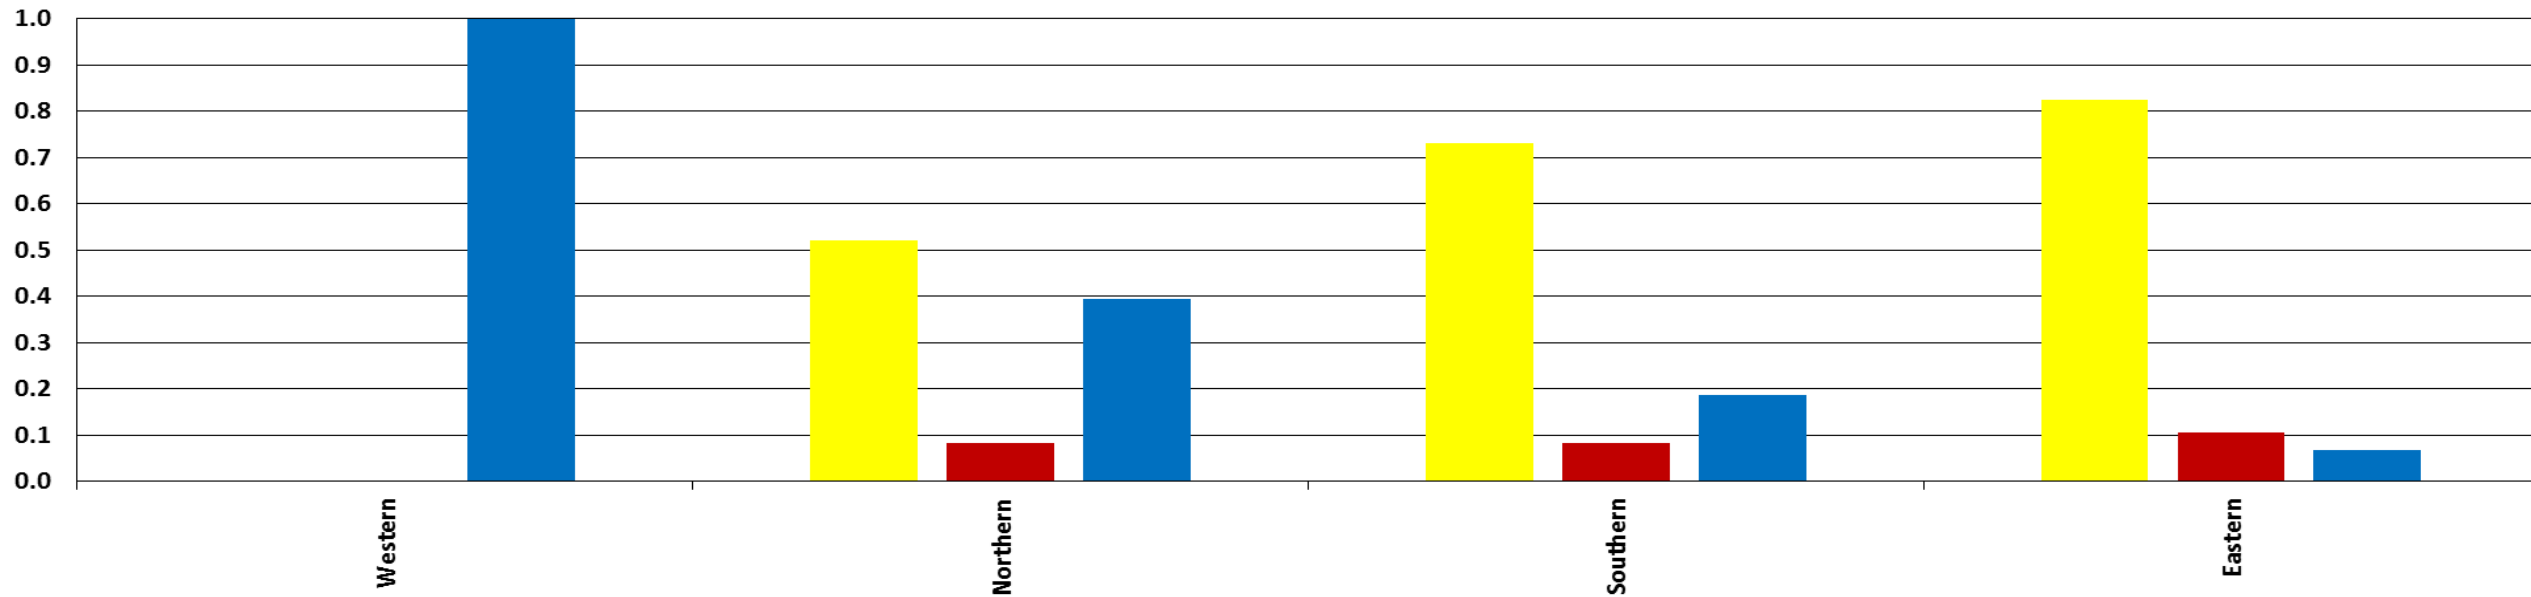

Share of electrification options in all Sierra Leonean regions

SHS (%) Mini-Grid (%) Grid (%)

GridBuilt-SHSDom

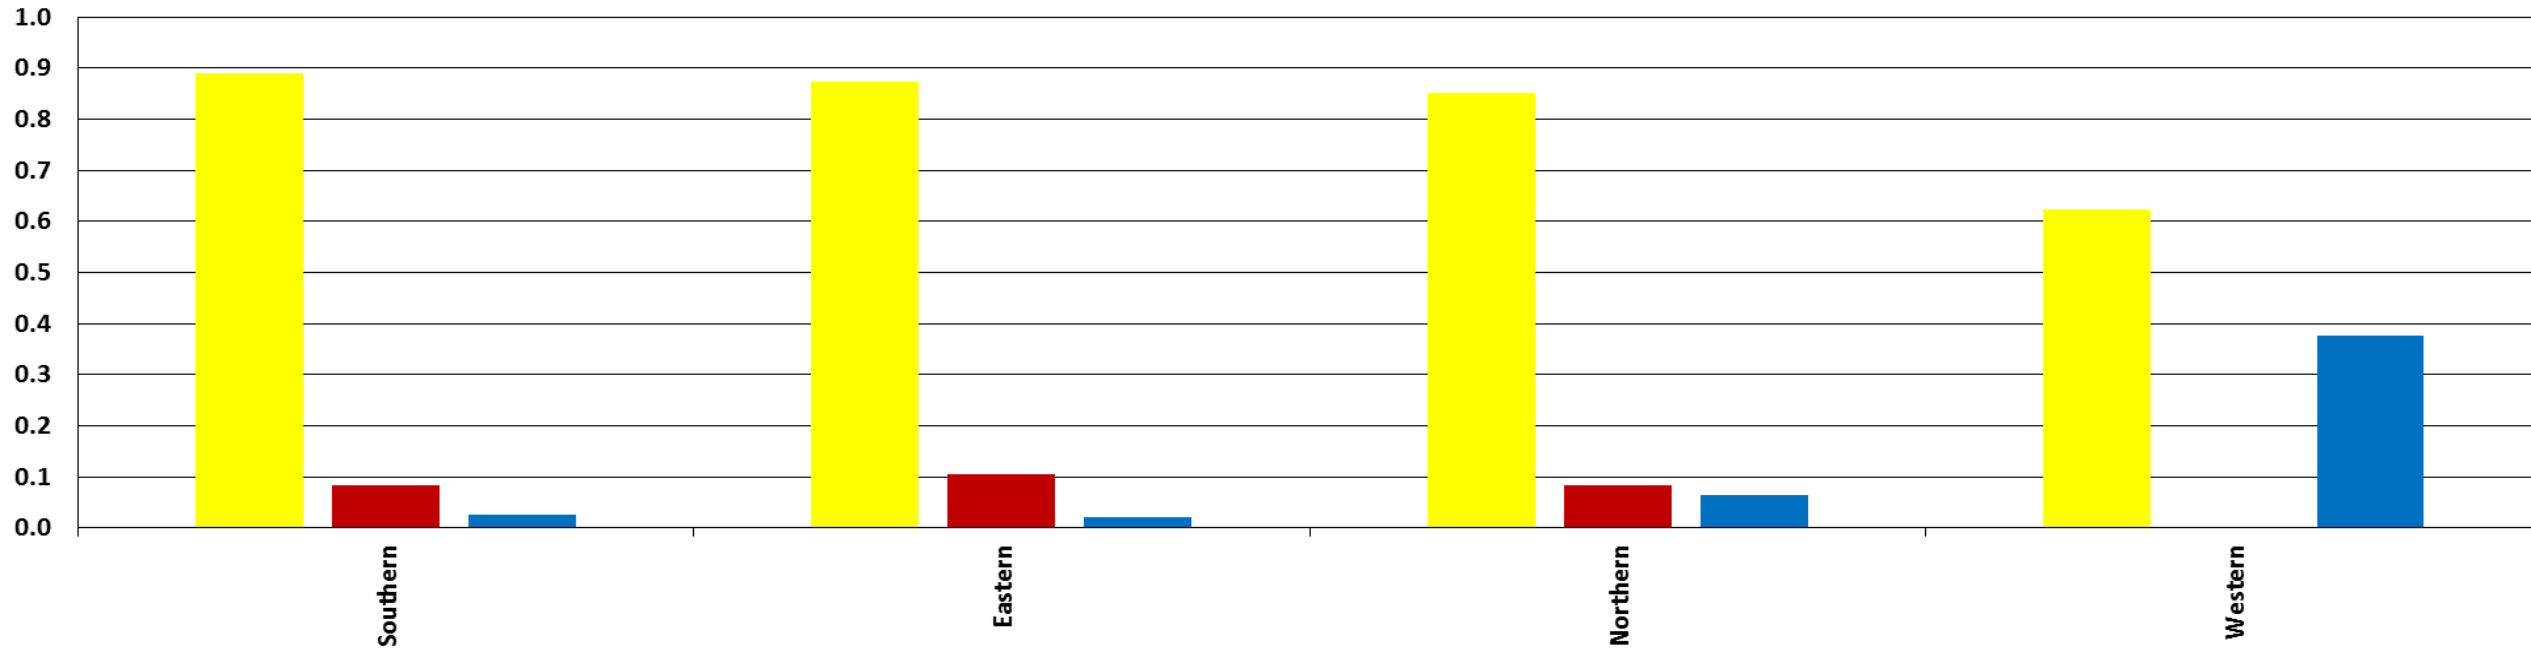

# Electrification option in all Sierra Leonean regions: GridPlanned-GridDom

Electrification options of Sierra Leonean regions

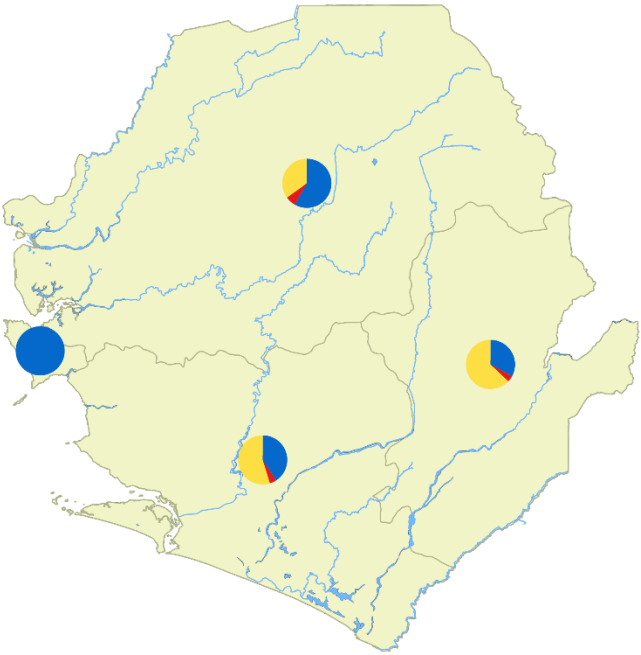

Electrification options of Sierra Leonean regions

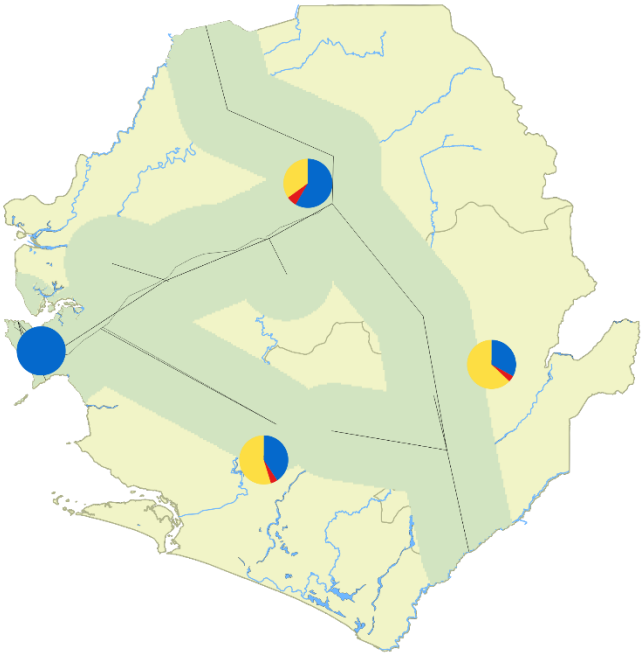

# Electrification option in all Sierra Leonean regions: GridPlanned-SHSDom

Electrification options of Sierra Leonean regions



Electrification options of Sierra Leonean regions



# Electrification option: GridPlanned-SHSDom

# Electrification option: GridPlanned-GridDom

Electrification options of Sierra Leonean regions

- Electrification option
- Solar Home System
  - Mini-Grid
  - Grid Extension

- Power Grid
- River and Lake

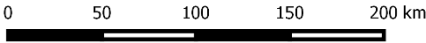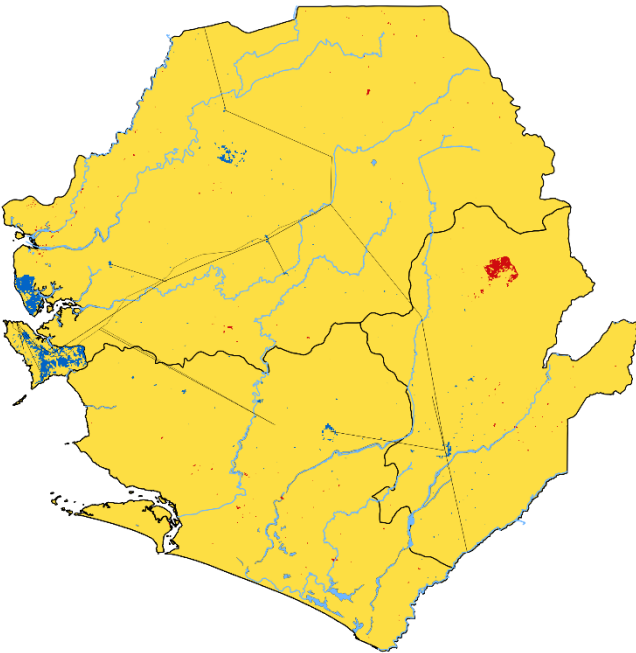

Electrification options of Sierra Leonean regions

- Electrification option
- Solar Home System
  - Mini-Grid
  - Grid Extension

- Power Grid
- River and Lake

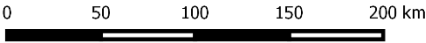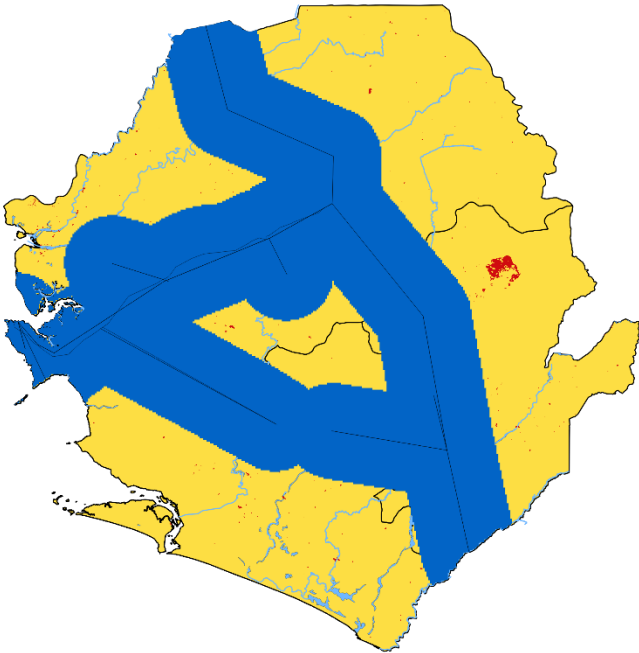

Share of electrification options in all Sierra Leonean regions

SHS (%) Mini-Grid (%) Grid (%)

GridPlanned-GridDom

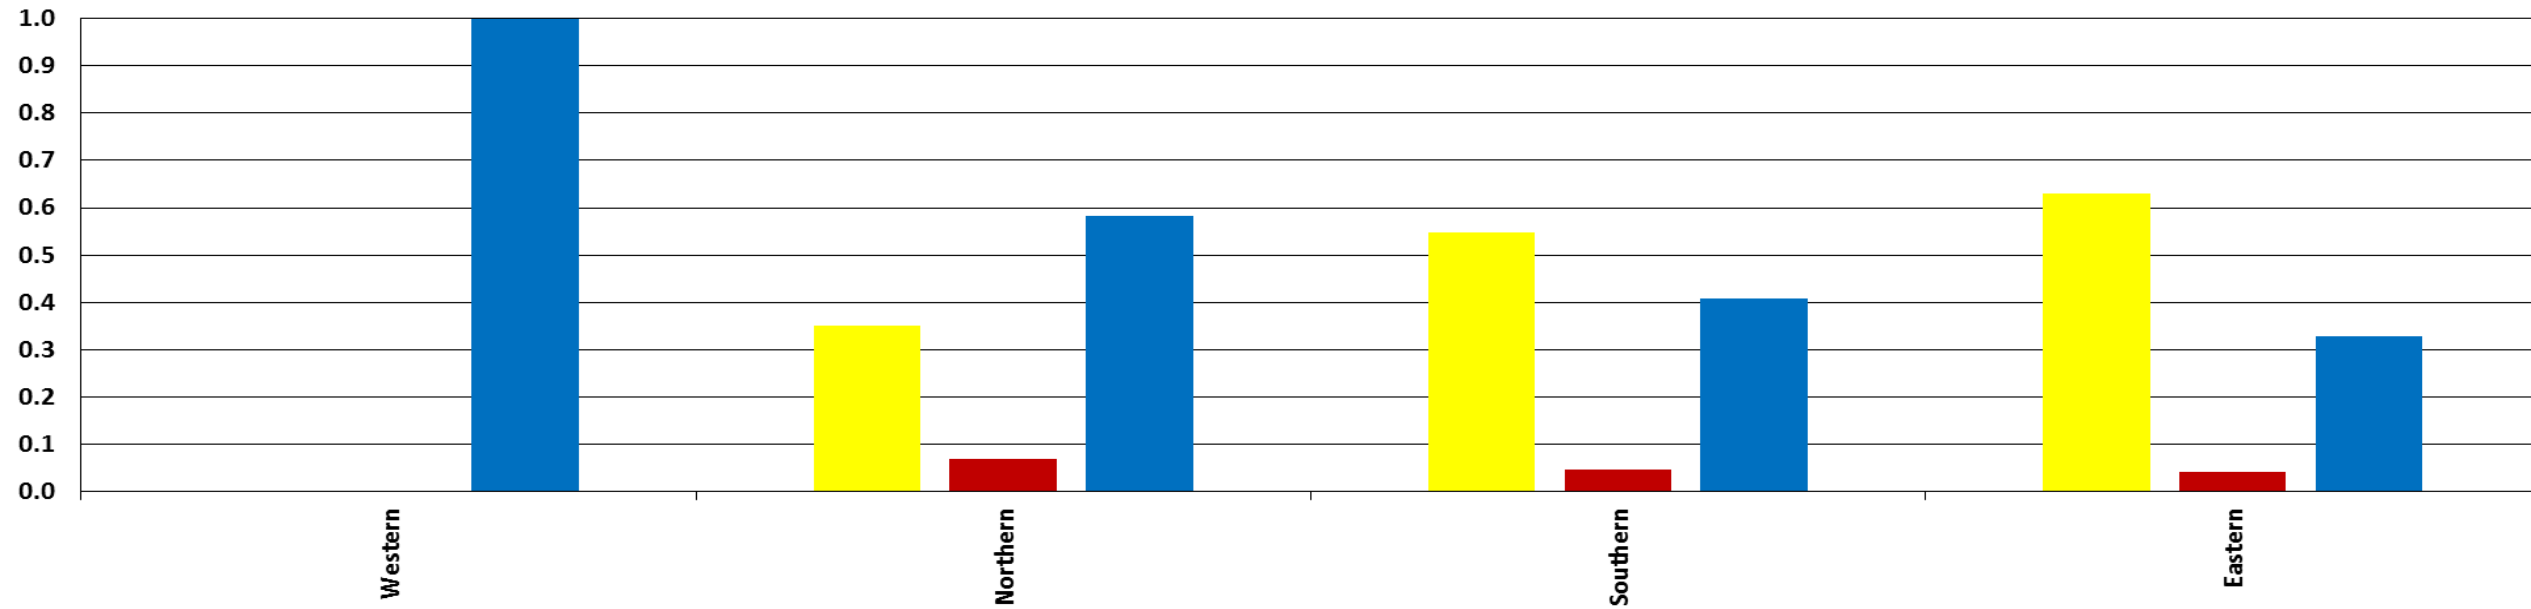

Share of electrification options in all Sierra Leonean regions

SHS (%) Mini-Grid (%) Grid (%)

GridPlanned-SHSDom

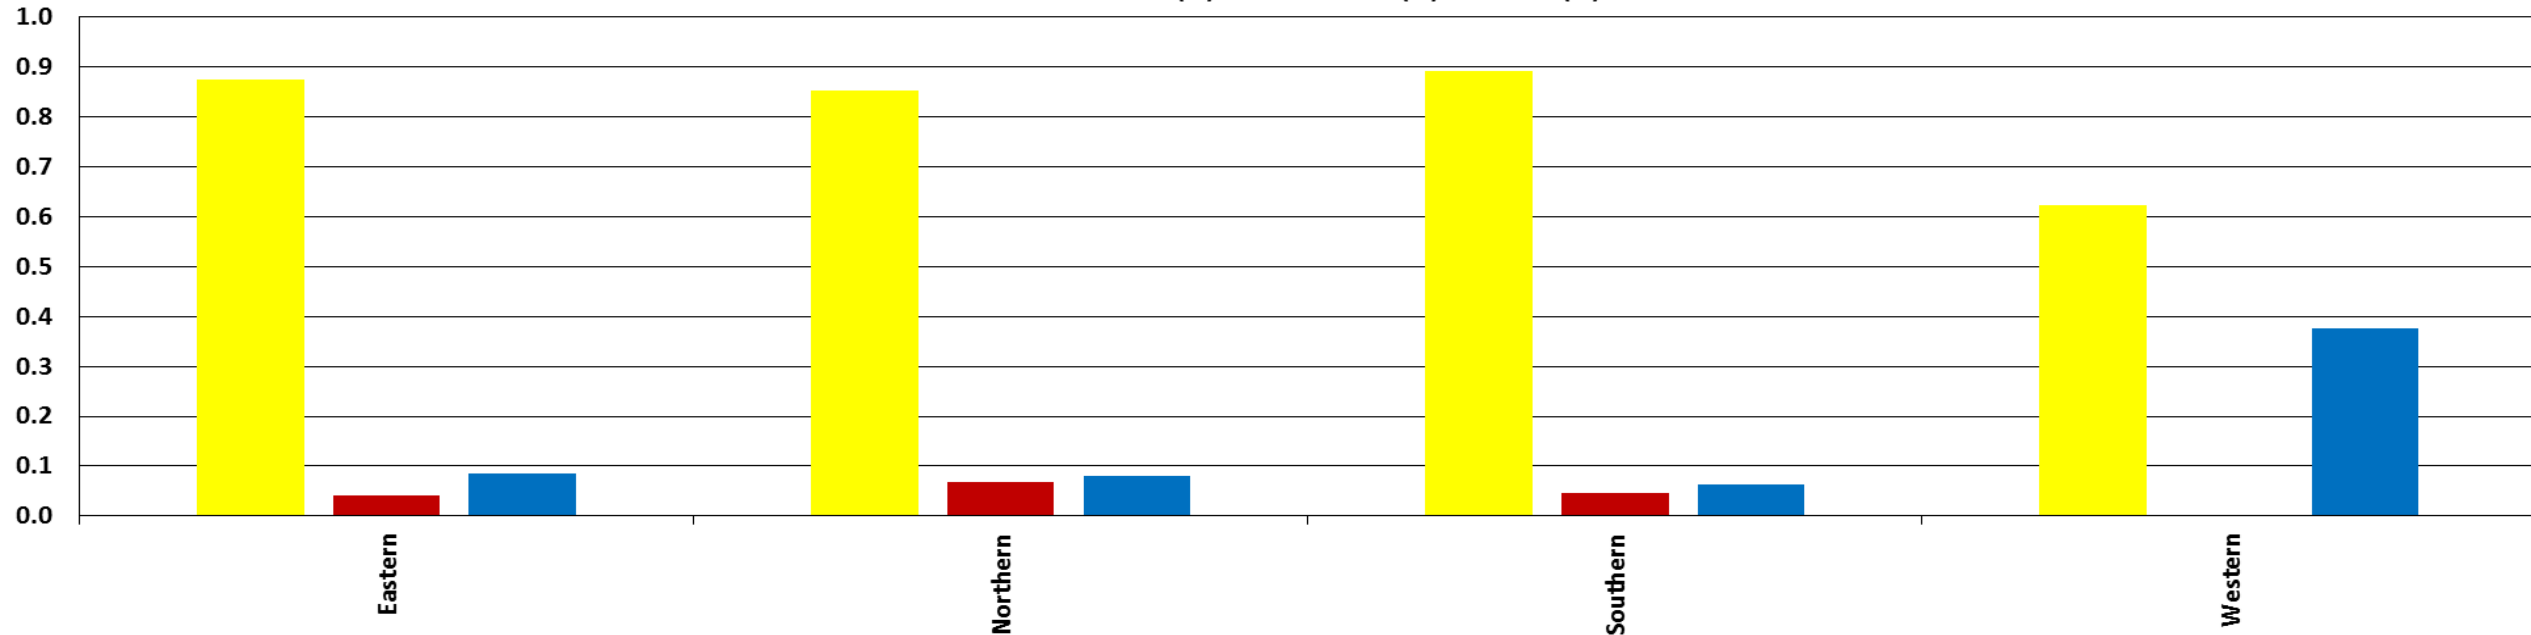

# Togo

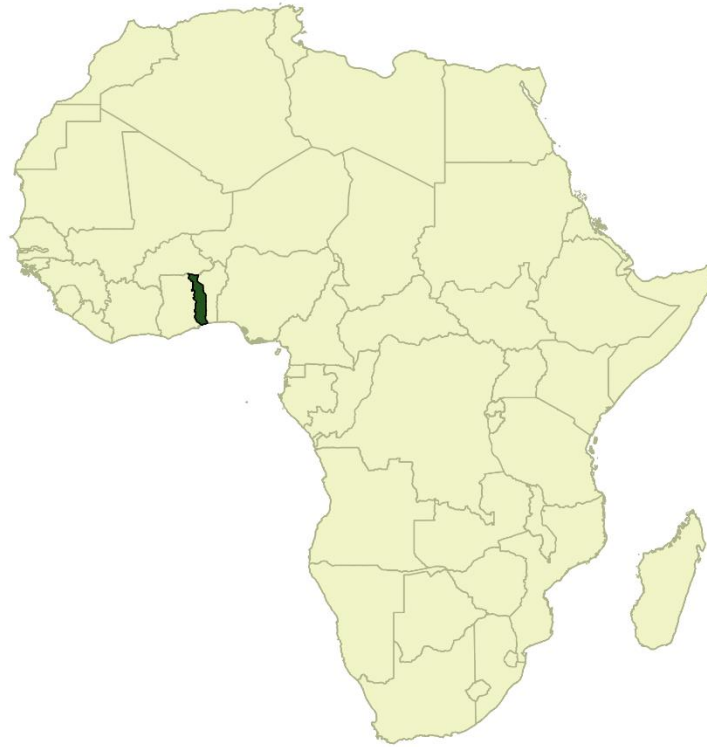

# Night light emission and Population of Togolese regions

## Night light emission in Togo

Detected night lights

- yes
- no

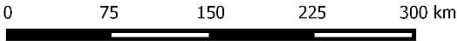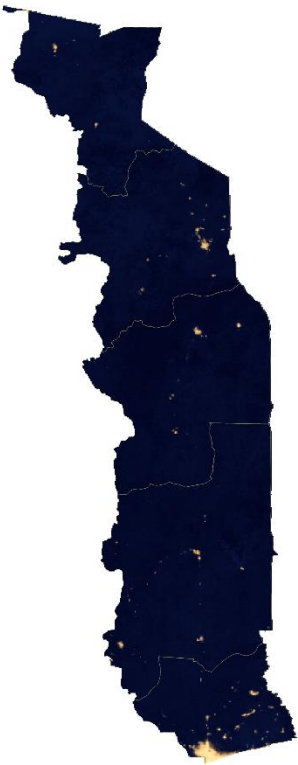

## Population structure of Togo

Population density (people/750x750m<sup>2</sup>)

- 0.0
- 0.5
- 1.0
- 1.5
- >2.0

River and Lake

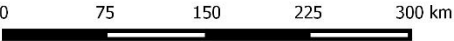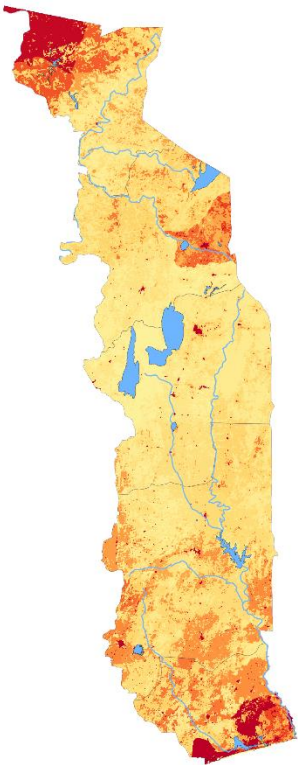

# Electrification option in all Togolese regions: GridBuilt-GridDom

## Electrification options of Togolese regions

Electrification option

- Solar Home System
- Mini-Grid
- Grid Extension

River and Lake

0 75 150 225 300 km

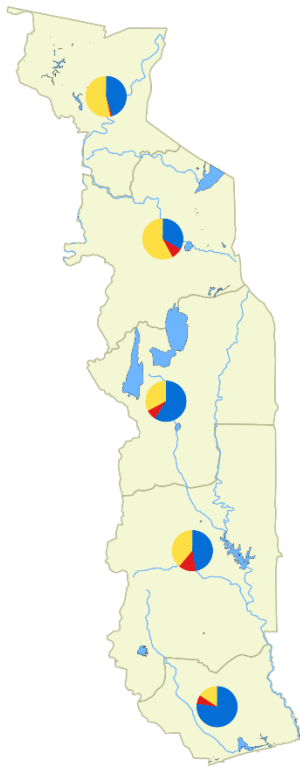

## Electrification options of Togolese regions

Electrification option

- Solar Home System
- Mini-Grid
- Grid Extension

Grid Buffer (diameter)

50 km

Power Grid

River and Lake

0 75 150 225 300 km

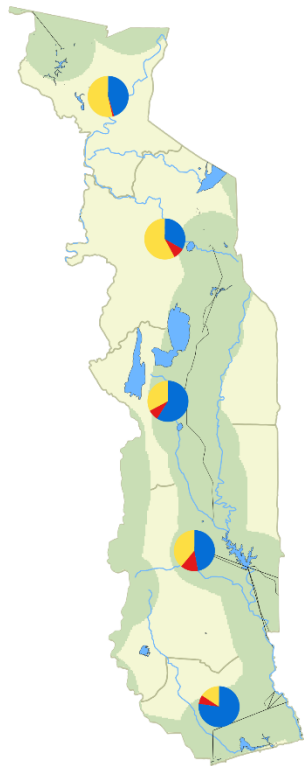

# Electrification option in all Togolese regions: GridBuilt-SHSDom

## Electrification options of Togolese regions

Electrification option

-  Solar Home System
-  Mini-Grid
-  Grid Extension

 River and Lake

0 75 150 225 300 km

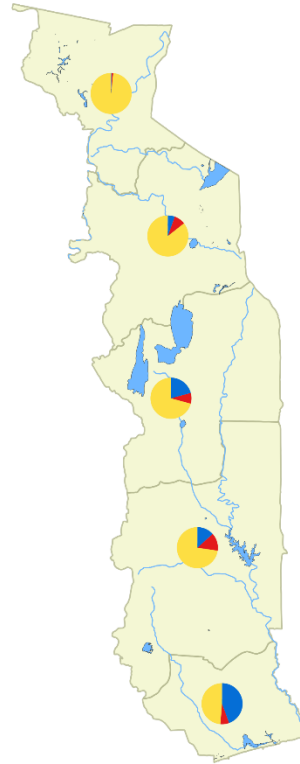

## Electrification options of Togolese regions

Electrification option

-  Solar Home System
-  Mini-Grid
-  Grid Extension

Grid Buffer (diameter)

 50 km

 Power Grid

 River and Lake

0 75 150 225 300 km

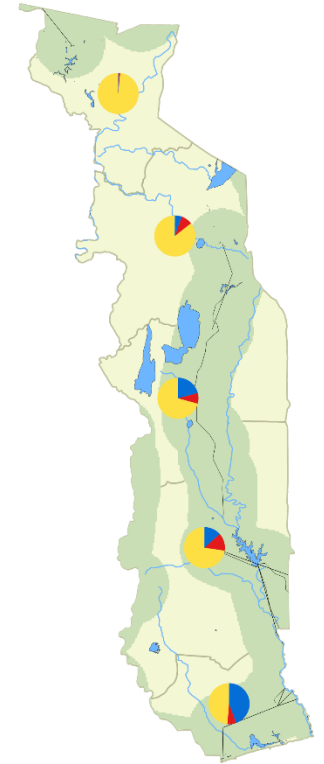

# Electrification option: GridBuilt-SHSDom

Electrification options of Togolese regions

- Electrification option
- Solar Home System
  - Mini-Grid
  - Grid Extension

- Power Grid
- River and Lake

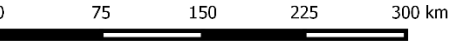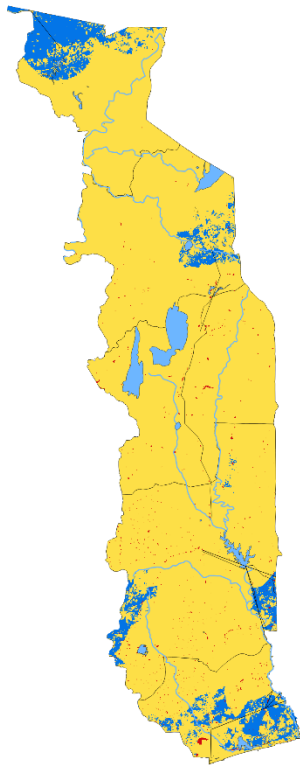

# Electrification option: GridBuilt-GridDom

Electrification options of Togolese regions

- Electrification option
- Solar Home System
  - Mini-Grid
  - Grid Extension

- Power Grid
- River and Lake

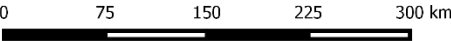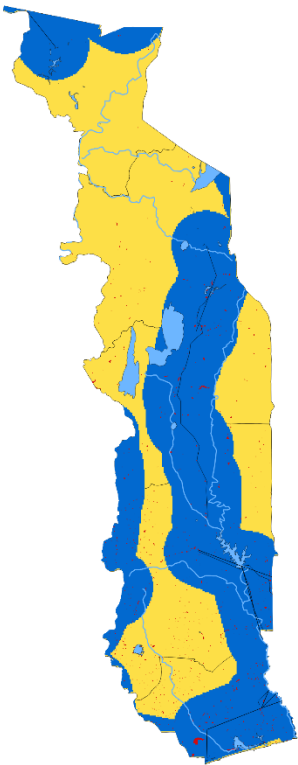

Share of electrification options in all Togolese regions

SHS (%) Mini-Grid (%) Grid (%)

GridBuilt-GridDom

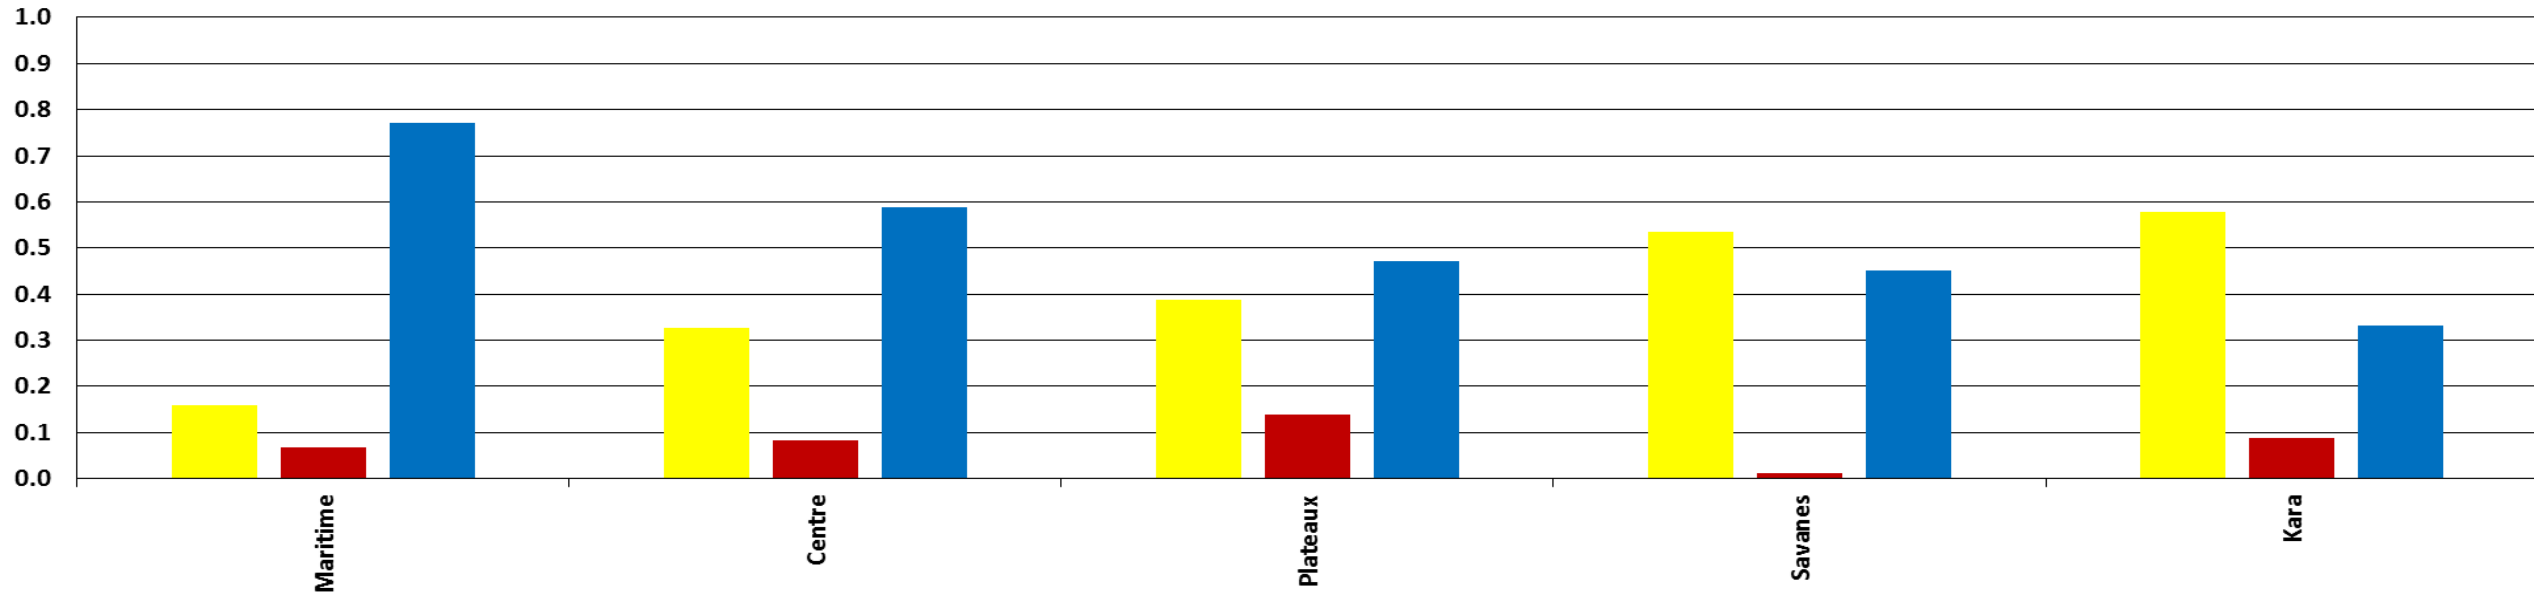

Share of electrification options in all Togolese regions

SHS (%) Mini-Grid (%) Grid (%)

GridBuilt-SHSDom

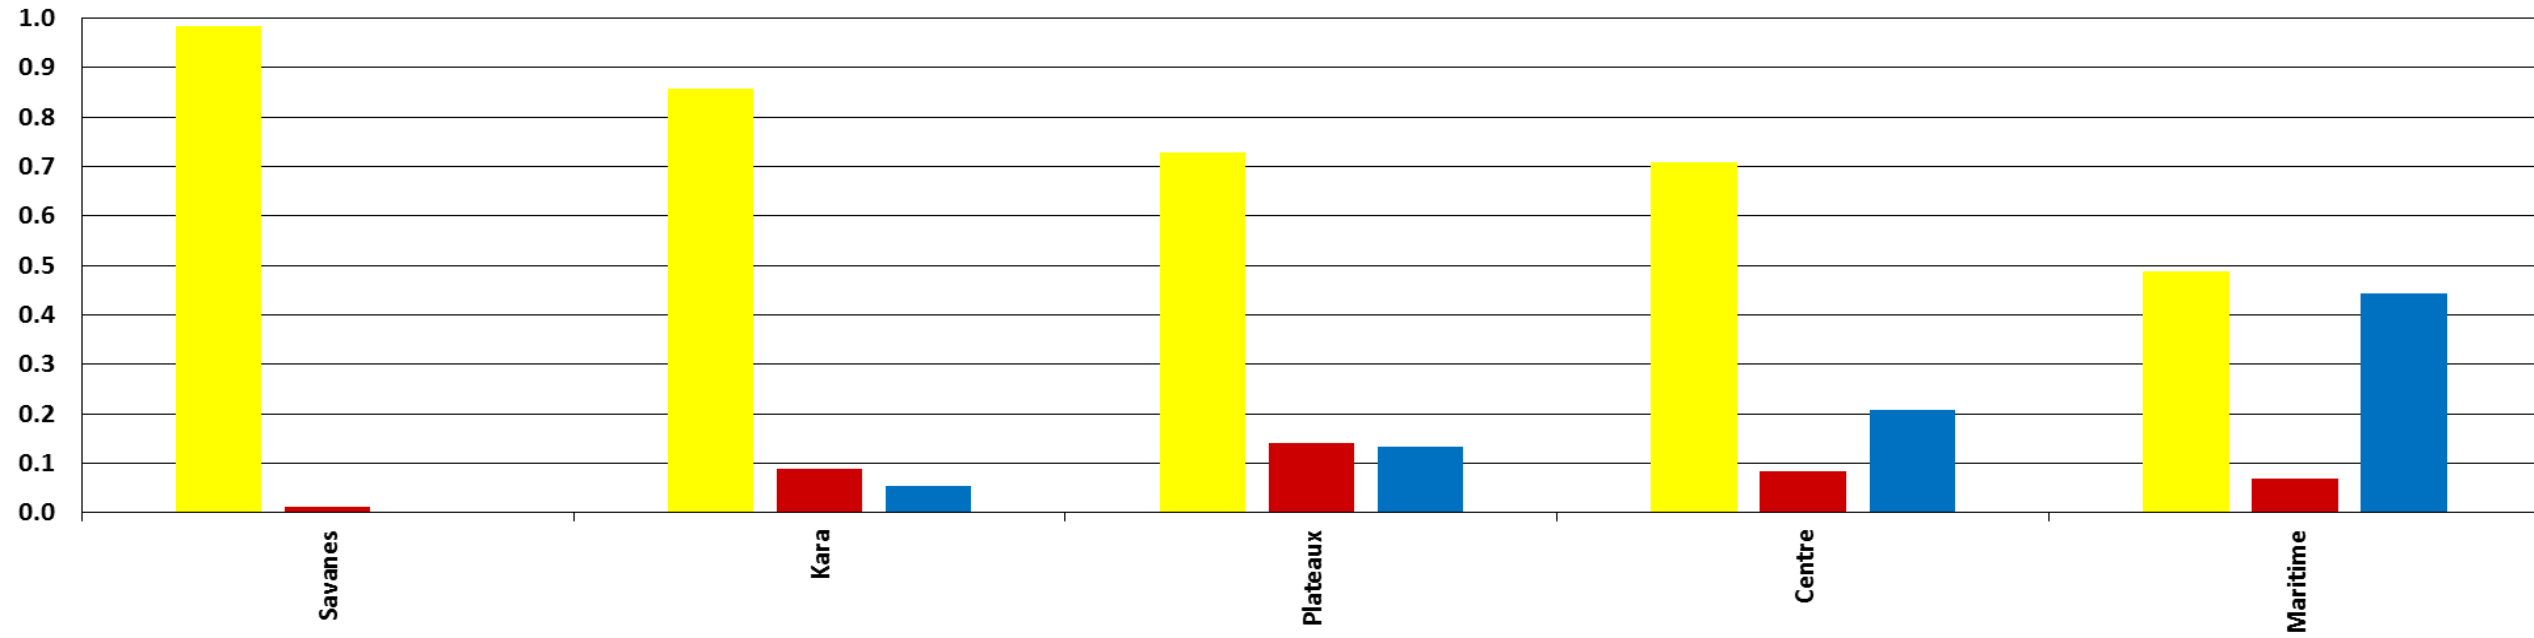

# Electrification option in all Togolese regions: GridPlanned-GridDom

## Electrification options of Togolese regions

Electrification option

- Solar Home System
- Mini-Grid
- Grid Extension

River and Lake

0 75 150 225 300 km

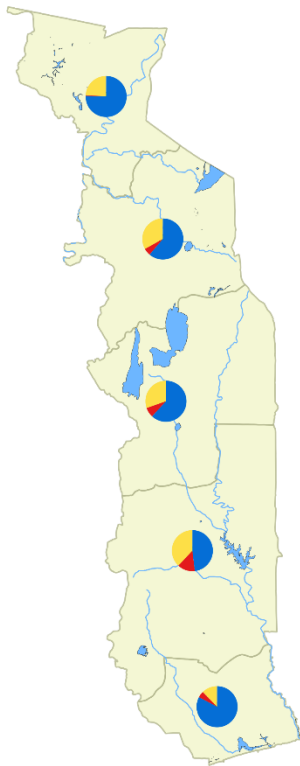

## Electrification options of Togolese regions

Electrification option

- Solar Home System
- Mini-Grid
- Grid Extension

Grid Buffer (diameter)

- 50 km
- Power Grid
- River and Lake

0 75 150 225 300 km

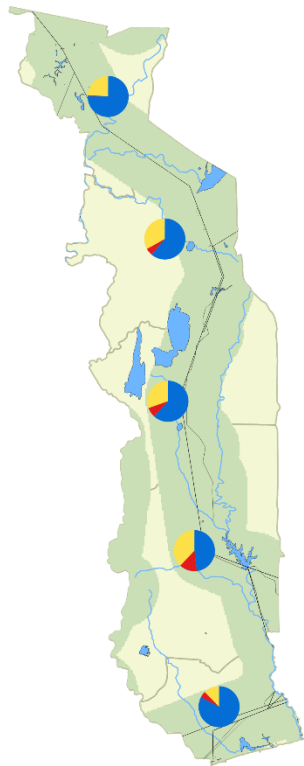

# Electrification option in all Togolese regions: GridPlanned-SHSDom

## Electrification options of Togolese regions

Electrification option

- Solar Home System
- Mini-Grid
- Grid Extension

River and Lake

0 75 150 225 300 km

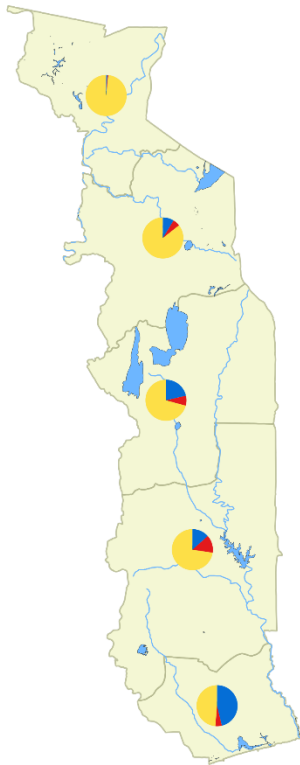

## Electrification options of Togolese regions

Electrification option

- Solar Home System
- Mini-Grid
- Grid Extension

Grid Buffer (diameter)

50 km

Power Grid

River and Lake

0 75 150 225 300 km

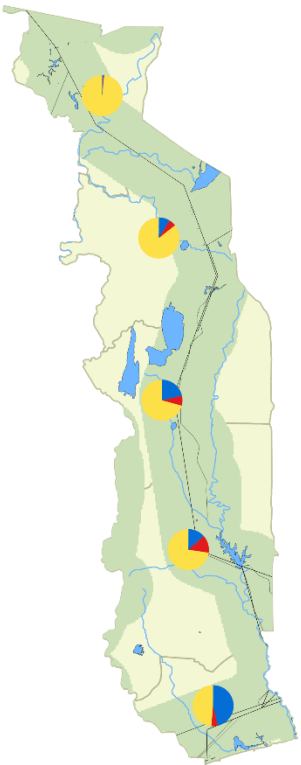

# Electrification option: GridPlanned-SHSDom

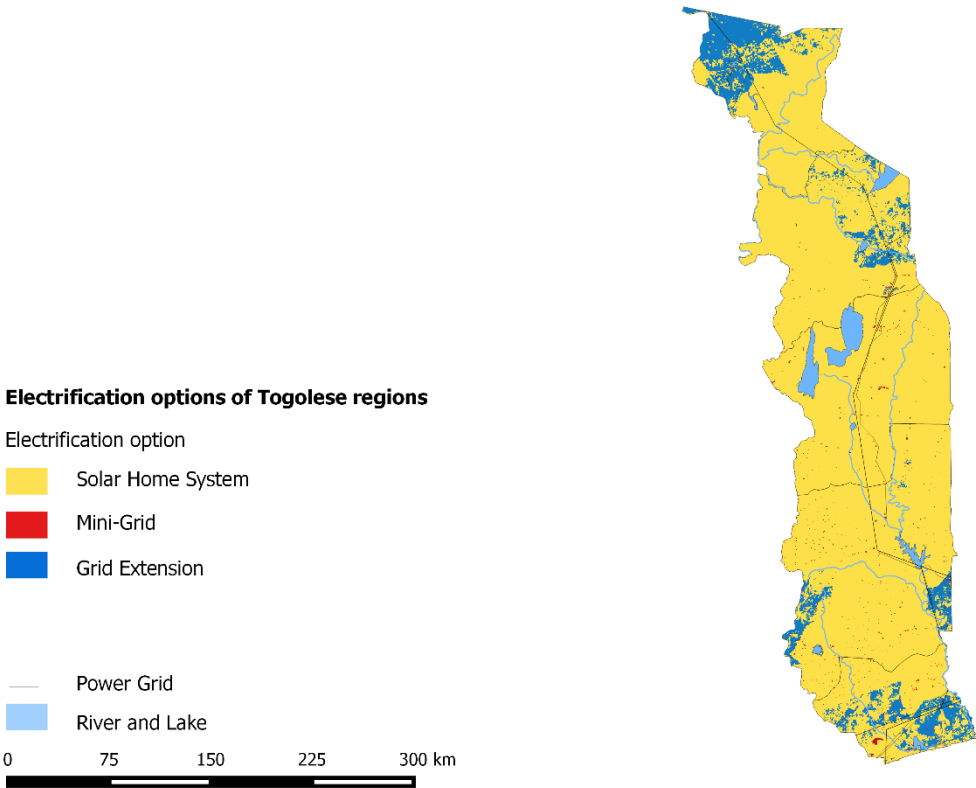

# Electrification option: GridPlanned-GridDom

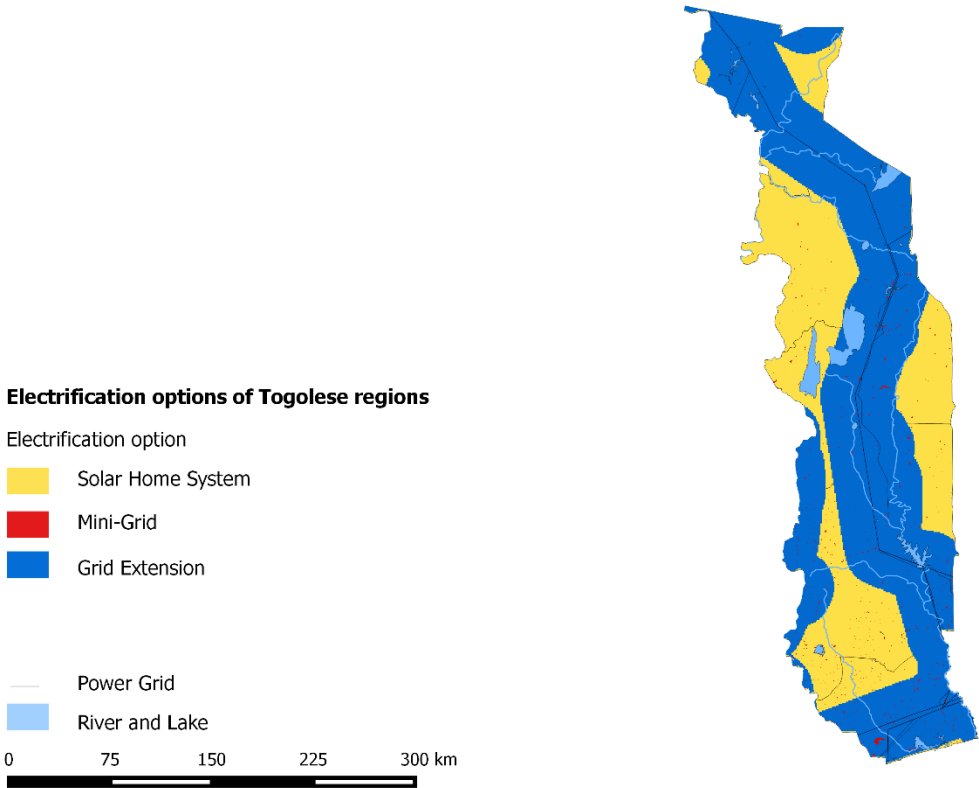

Share of electrification options in all Togolese regions

SHS (%) Mini-Grid (%) Grid (%)

GridPlanned-GridDom

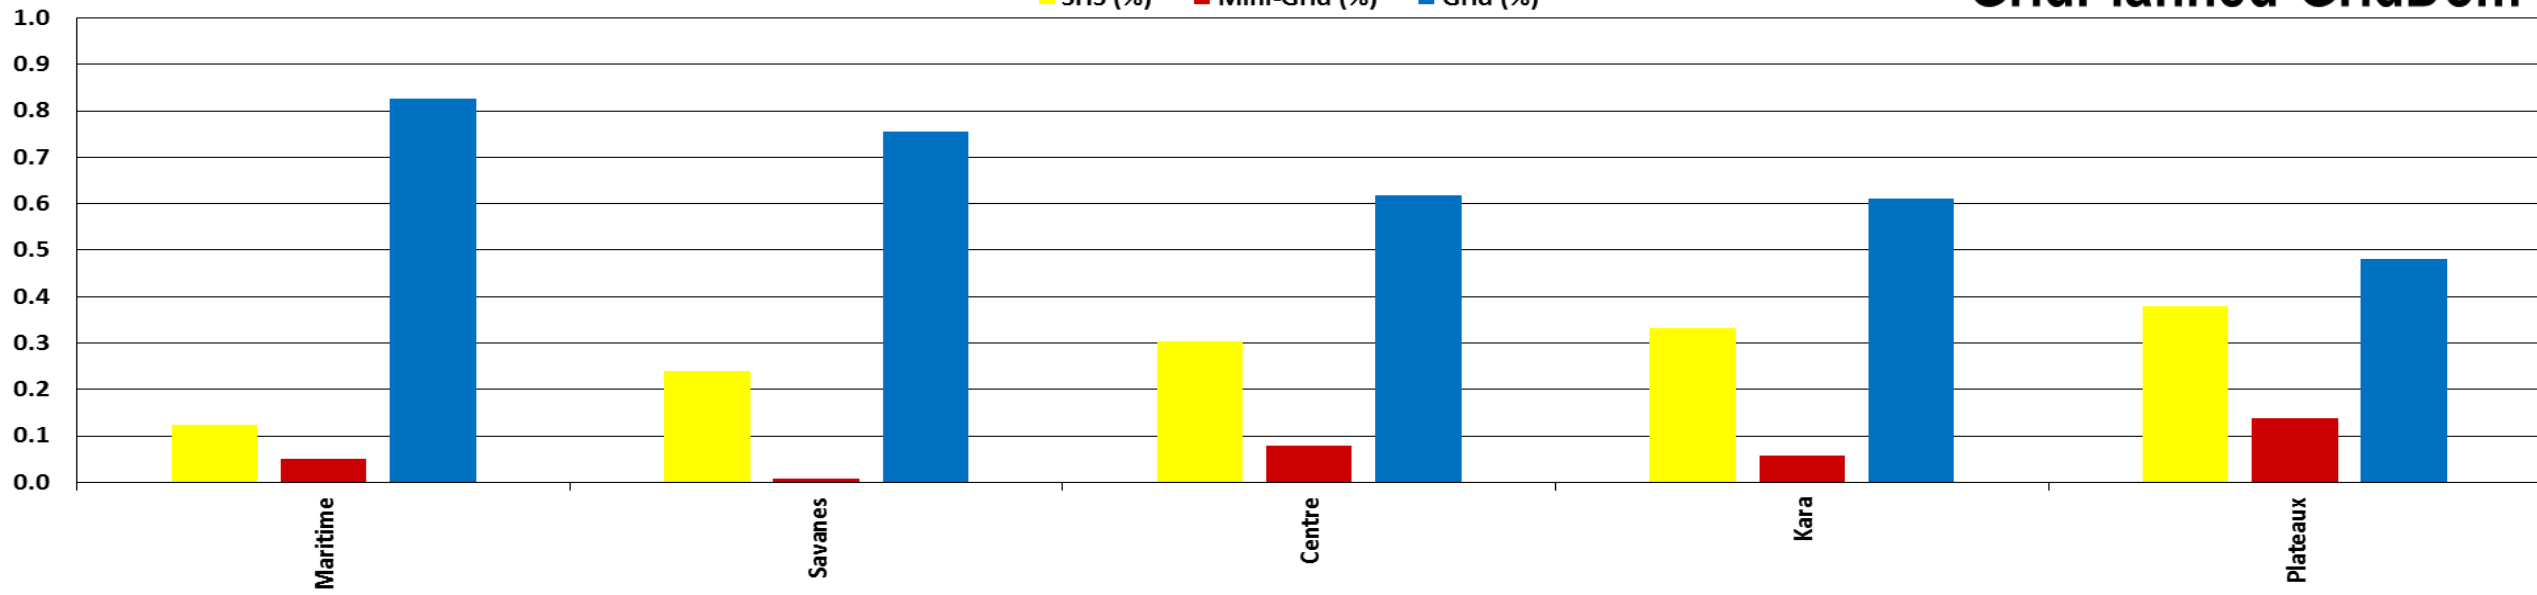

Share of electrification options in all Togolese regions

SHS (%) Mini-Grid (%) Grid (%)

GridPlanned-SHSDom

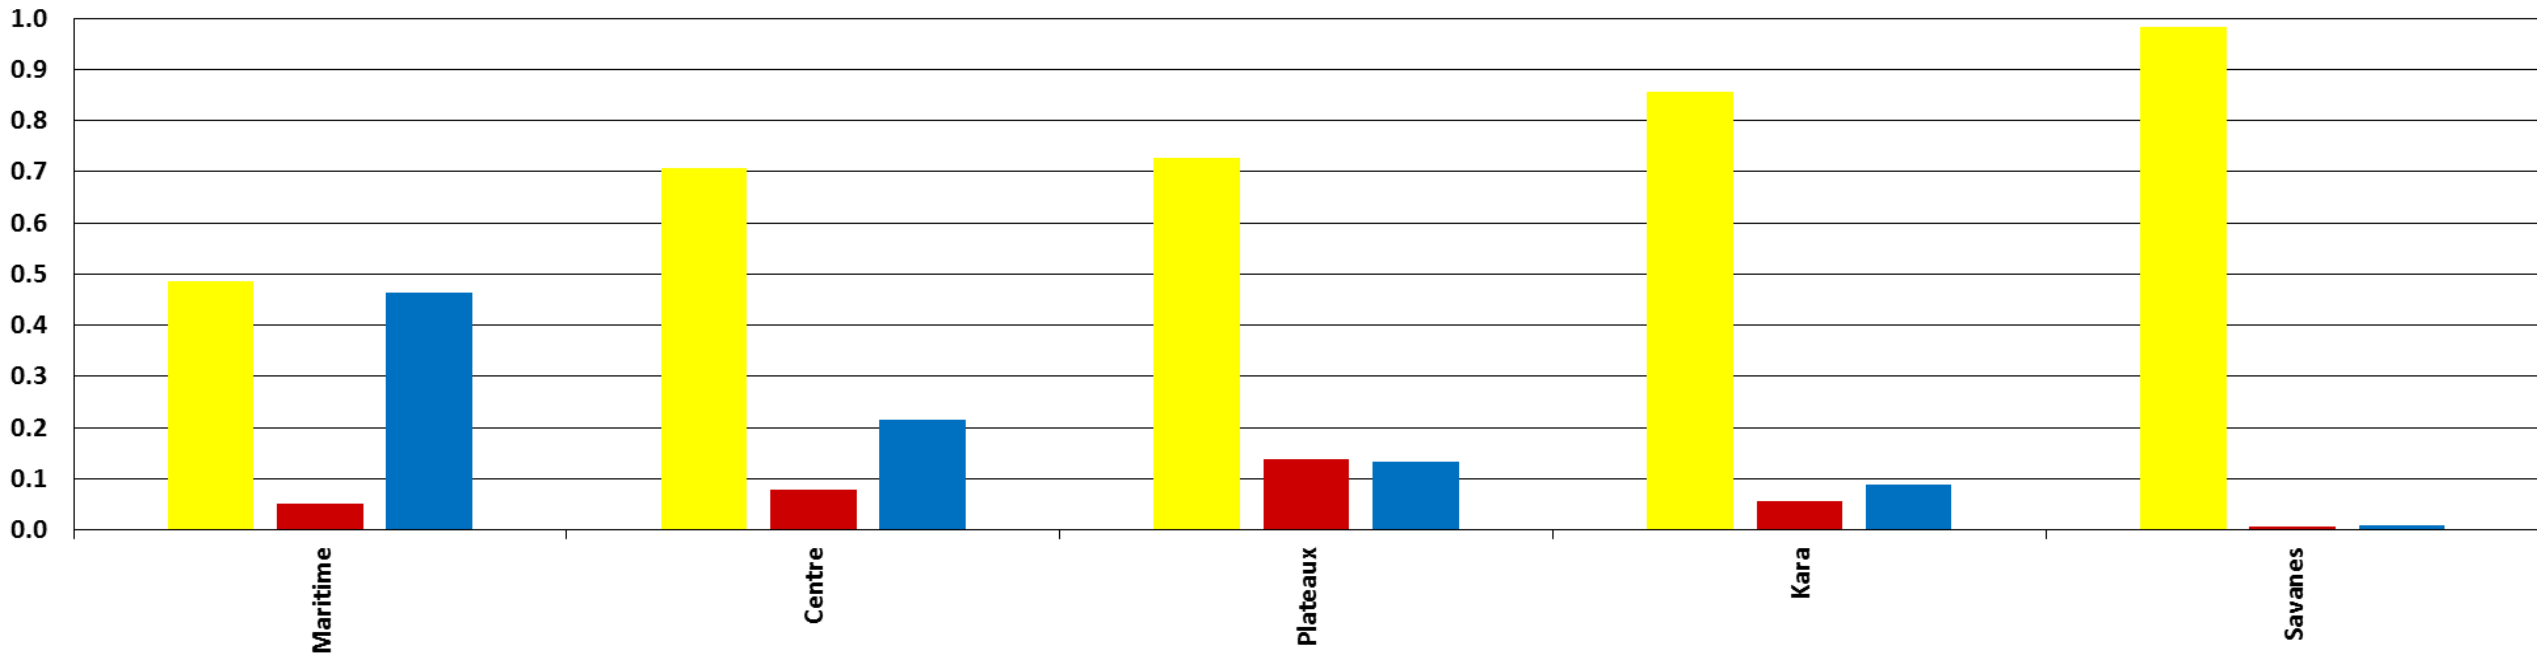

Supplement: s1 [file s1]
